# Supplementary material for: Integrating transcriptomic network reconstruction and eQTL analyses reveals mechanistic connections between genomic architecture and Brassica rapa development
Source: PubMed Central journal article supplement (PMC6759183; doi:10.1371/journal.pgen.1008367), 2019-09-12

HeightModel3\_v1\_ResErrModel,Treat= UN\_2011,Line 1 (#Inv=5);95CI GrowthCurves

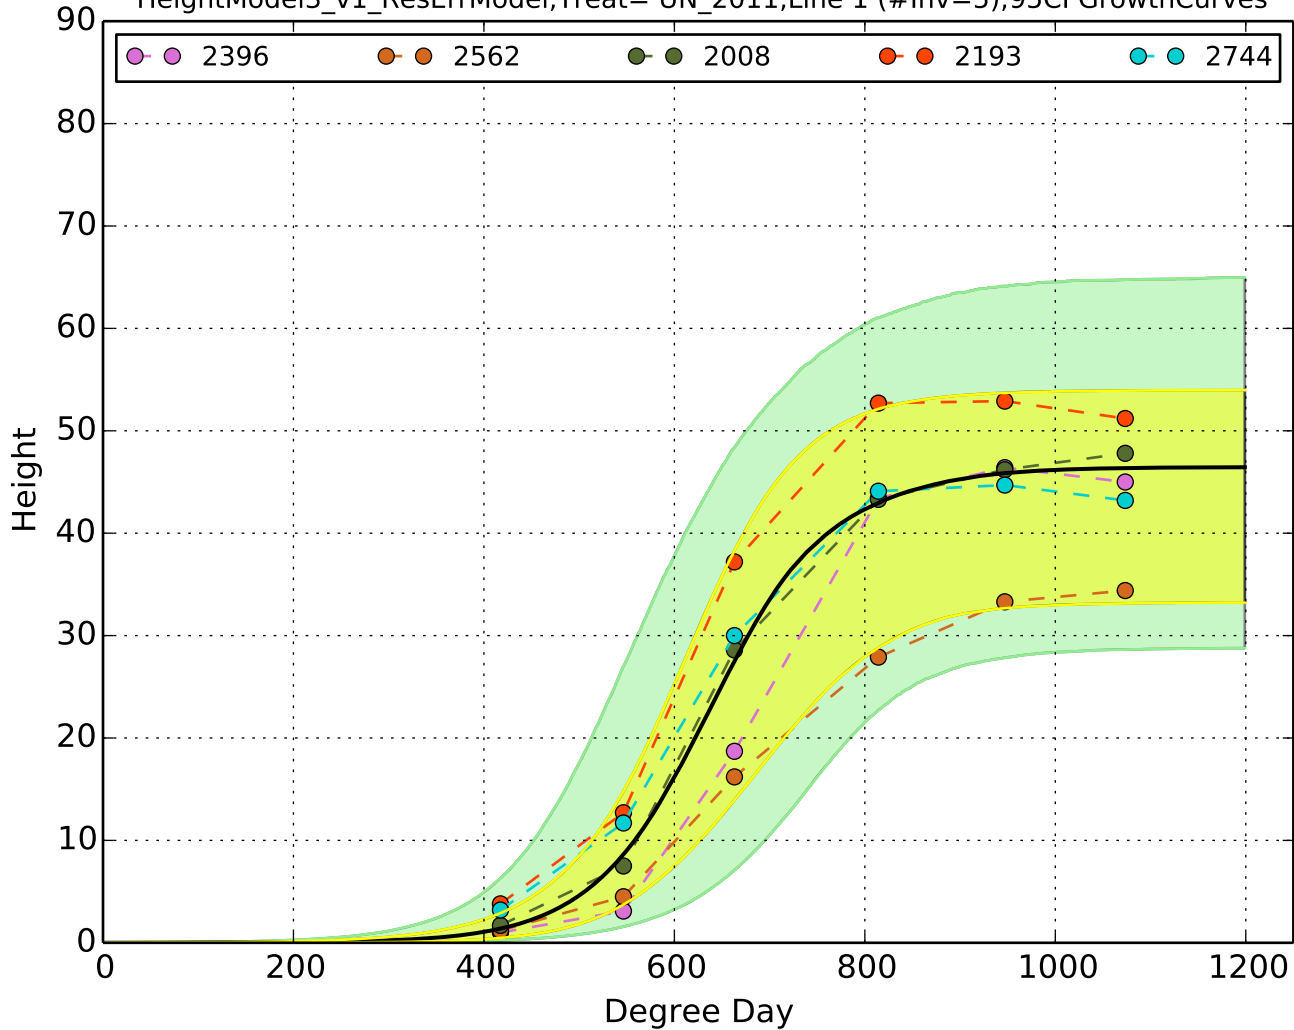

HeightModel3\_v1\_ResErrModel,Treat= UN\_2011,Line 2 (#Inv=5);95CI GrowthCurves

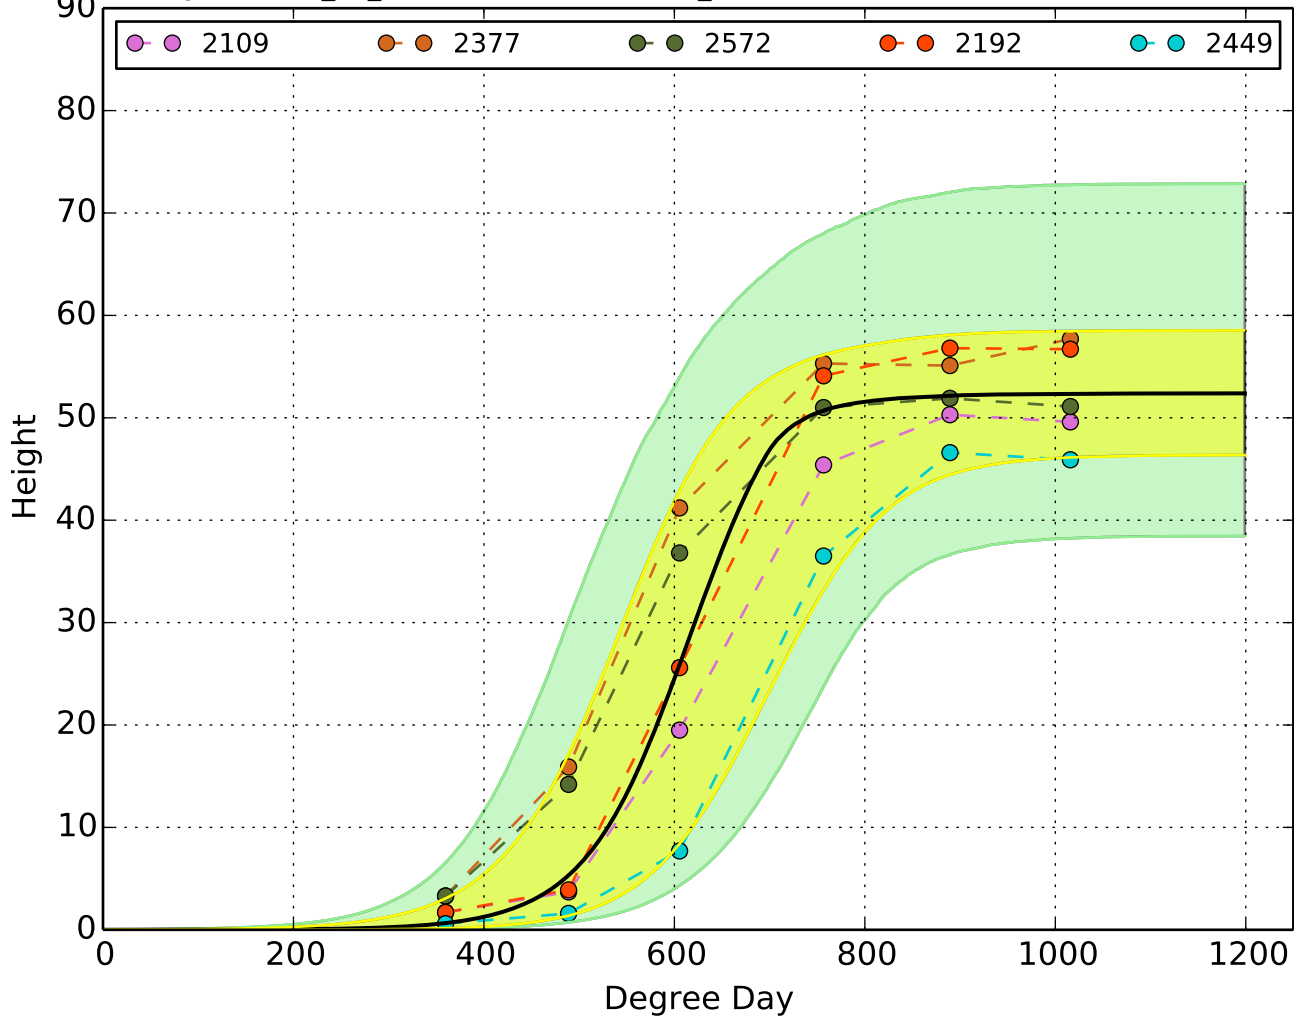

HeightModel3\_v1\_ResErrModel,Treat= UN\_2011,Line 7 (#Inv=6);95CI GrowthCurves

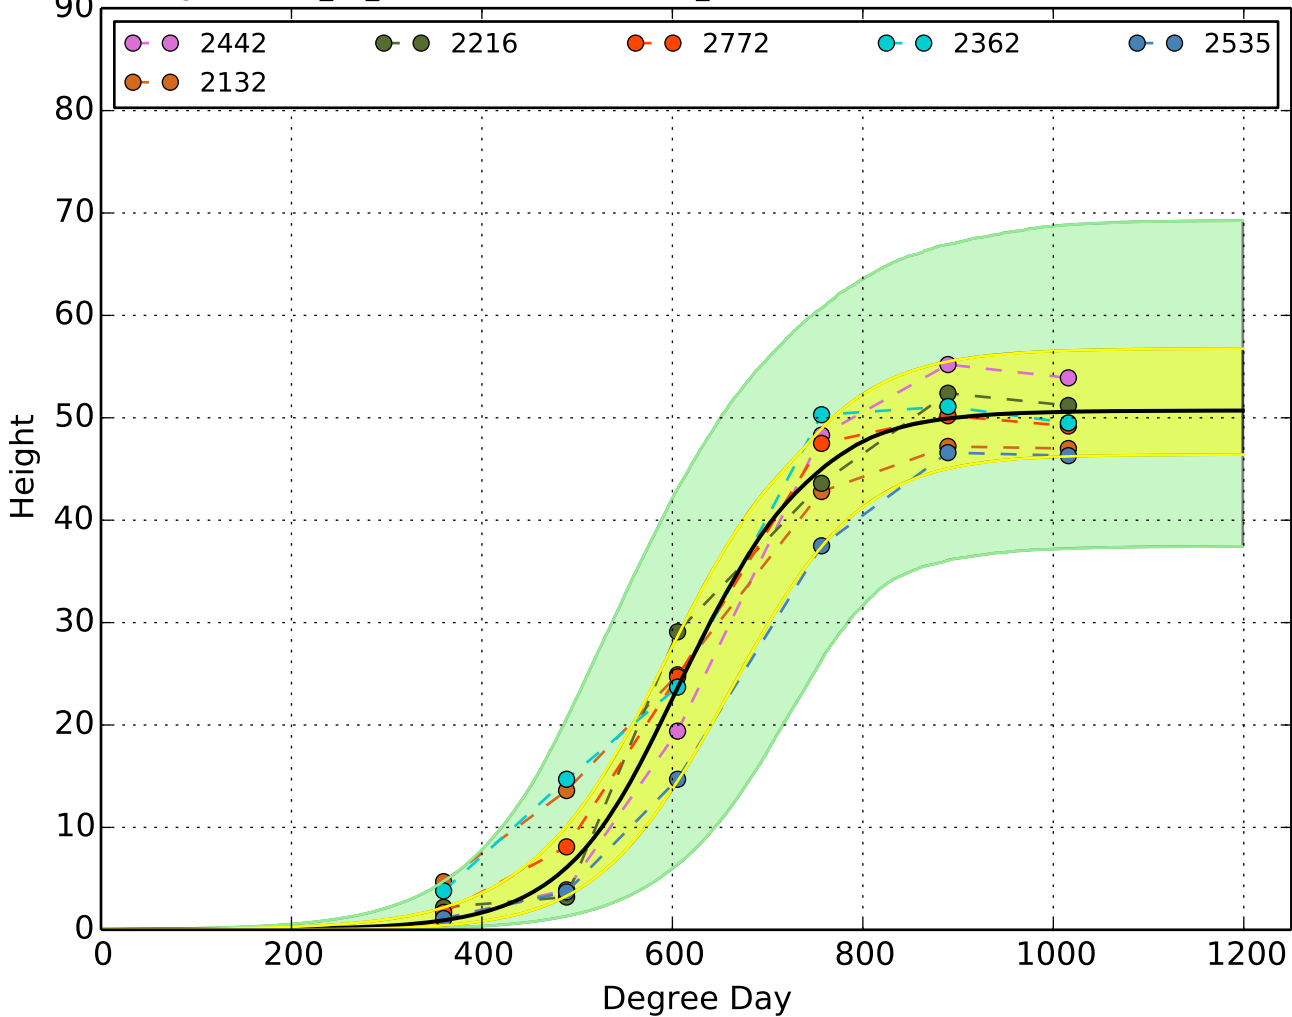

HeightModel3\_v1\_ResErrModel,Treat= UN\_2011,Line 9 (#Inv=5);95CI GrowthCurves

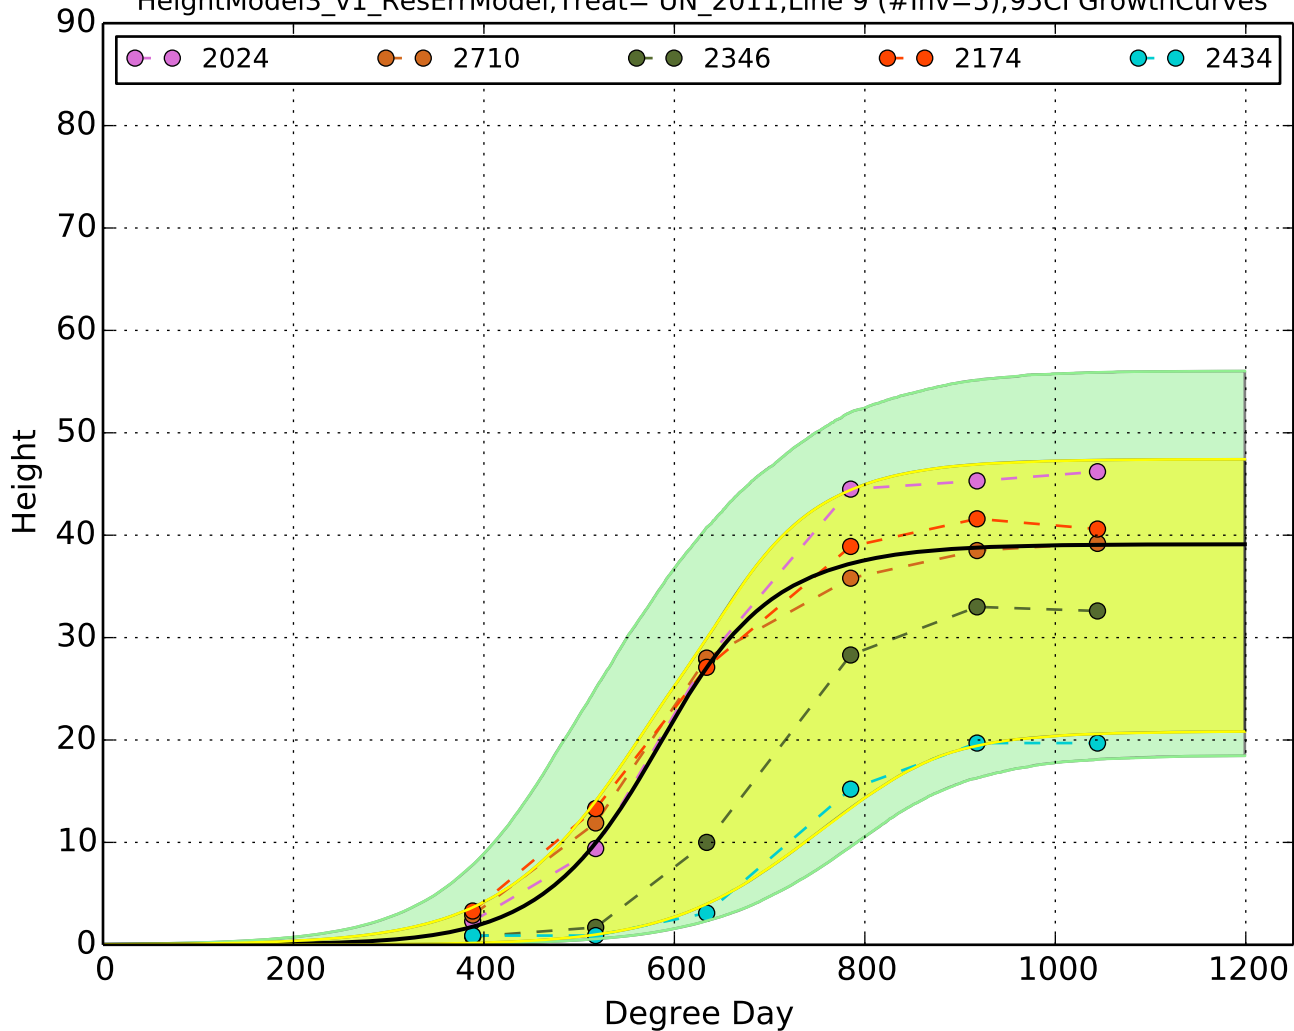

HeightModel3\_v1\_ResErrModel,Treat= UN\_2011,Line 12 (#Inv=10);95CI GrowthCurves

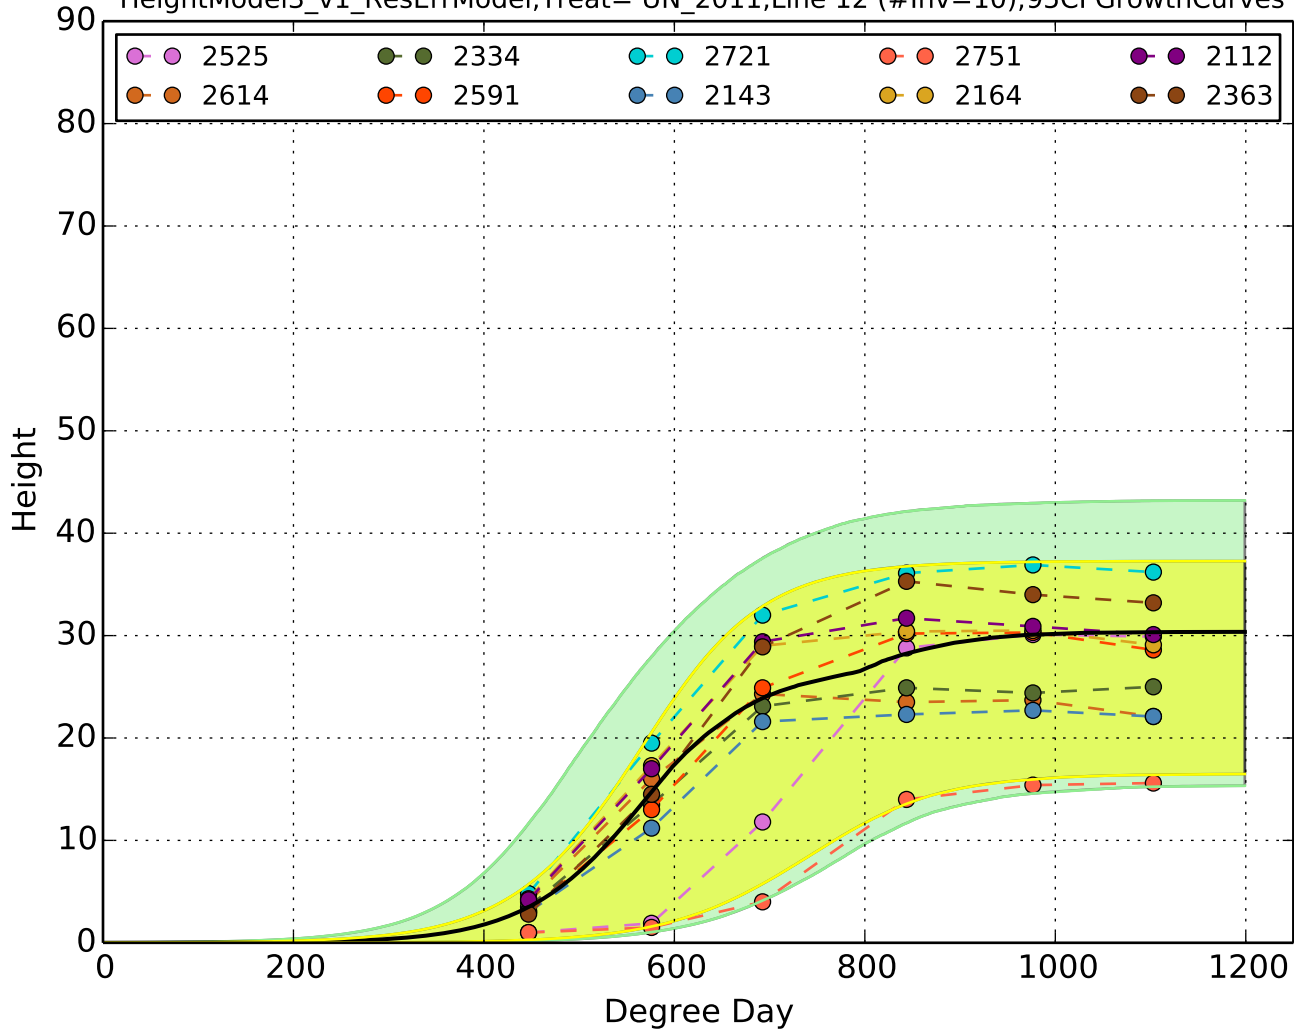

HeightModel3\_v1\_ResErrModel,Treat= UN\_2011,Line 15 (#Inv=6);95CI GrowthCurves

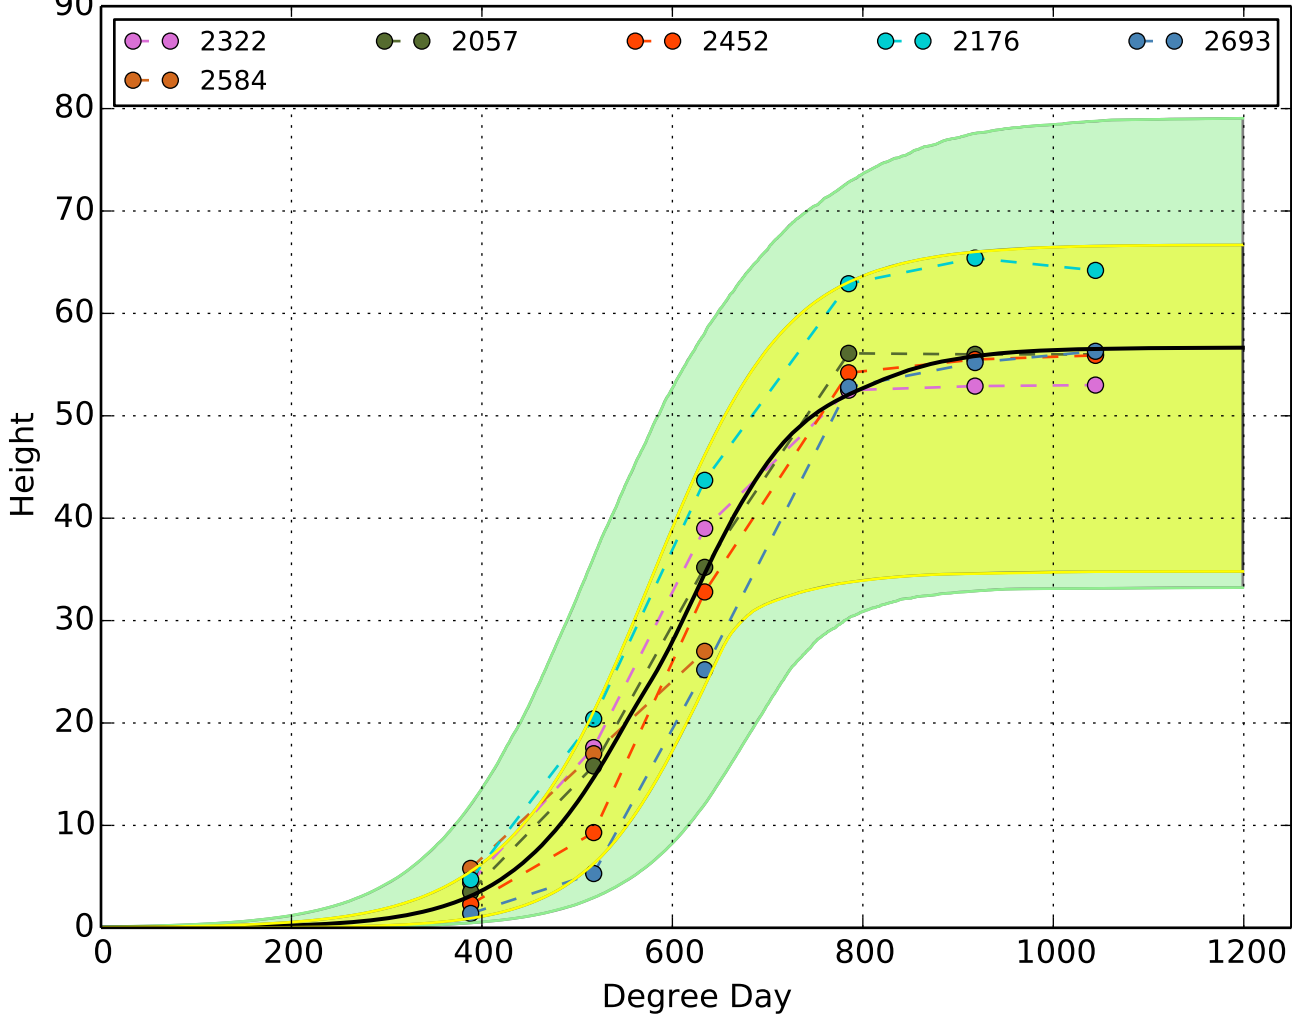

HeightModel3\_v1\_ResErrModel,Treat= UN\_2011,Line 16 (#Inv=5);95CI GrowthCurves

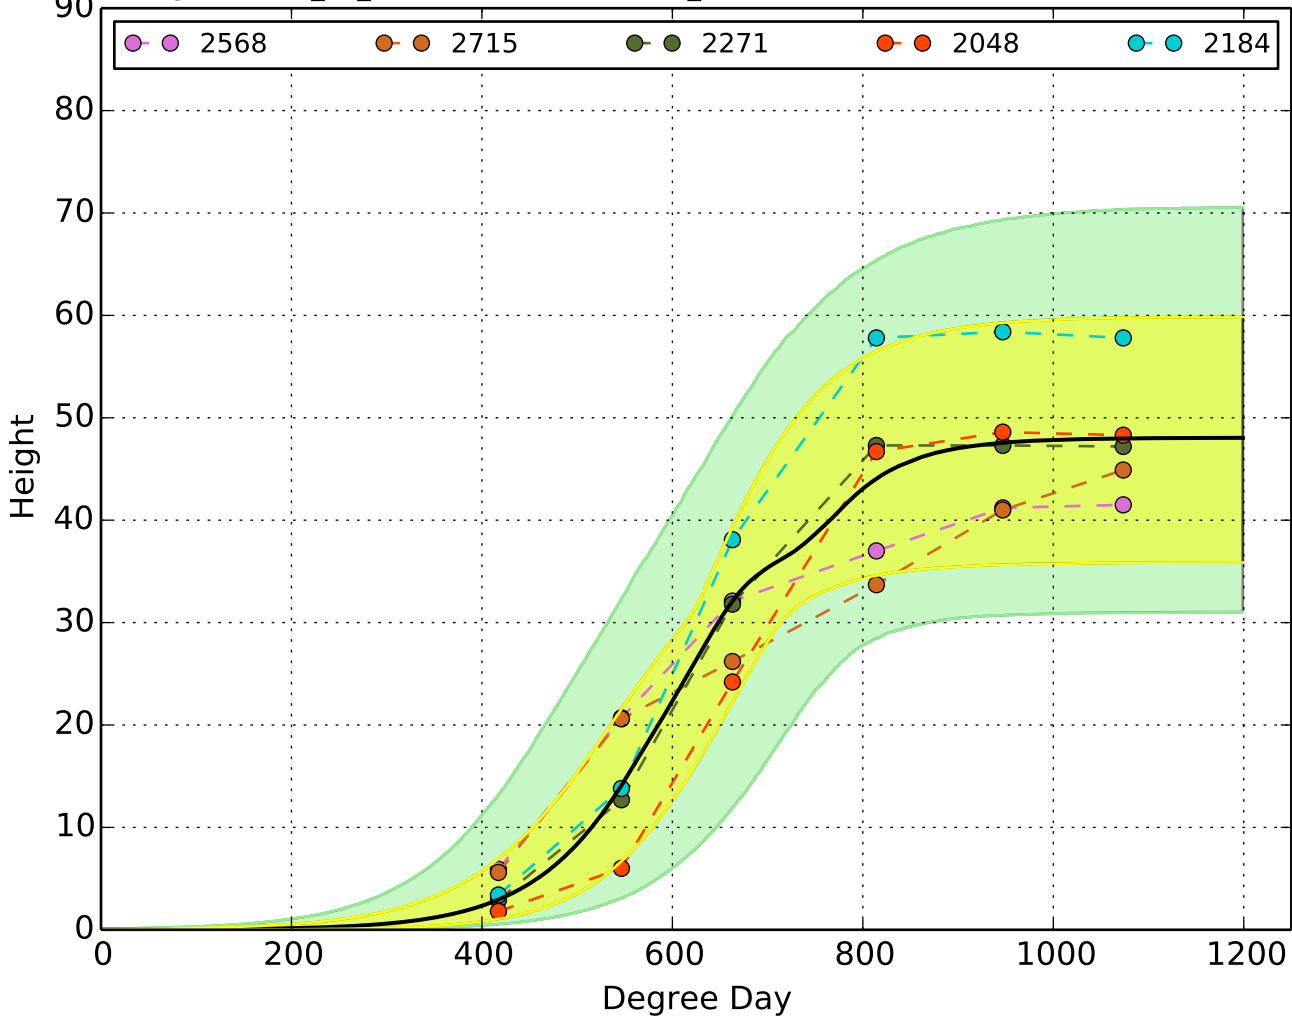

HeightModel3\_v1\_ResErrModel,Treat= UN\_2011,Line 21 (#Inv=6);95CI GrowthCurves

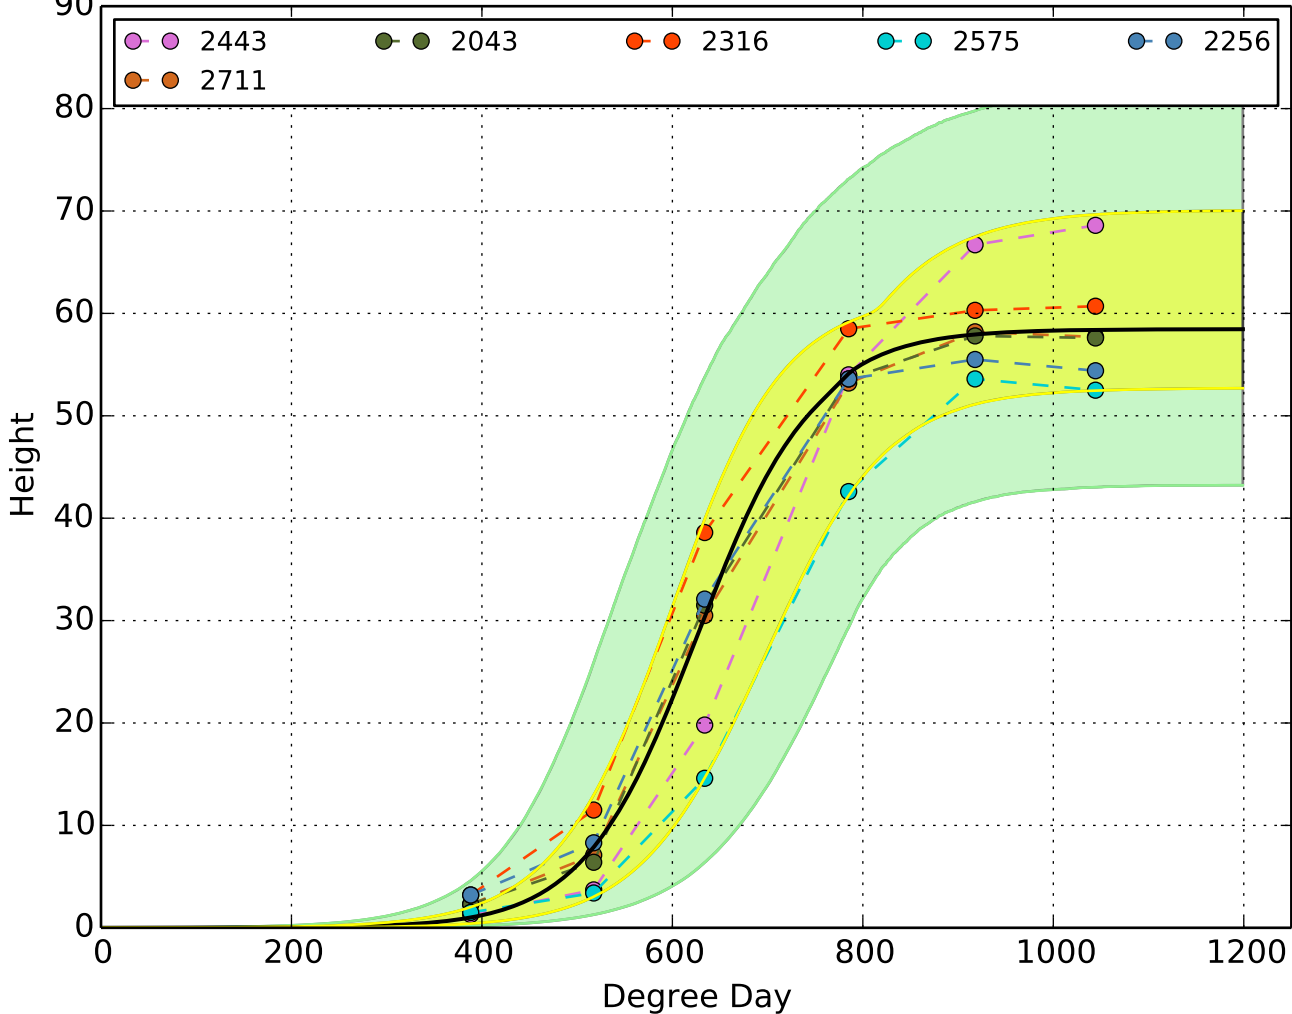



HeightModel3\_v1\_ResErrModel,Treat= UN\_2011,Line 23 (#Inv=6);95CI GrowthCurves

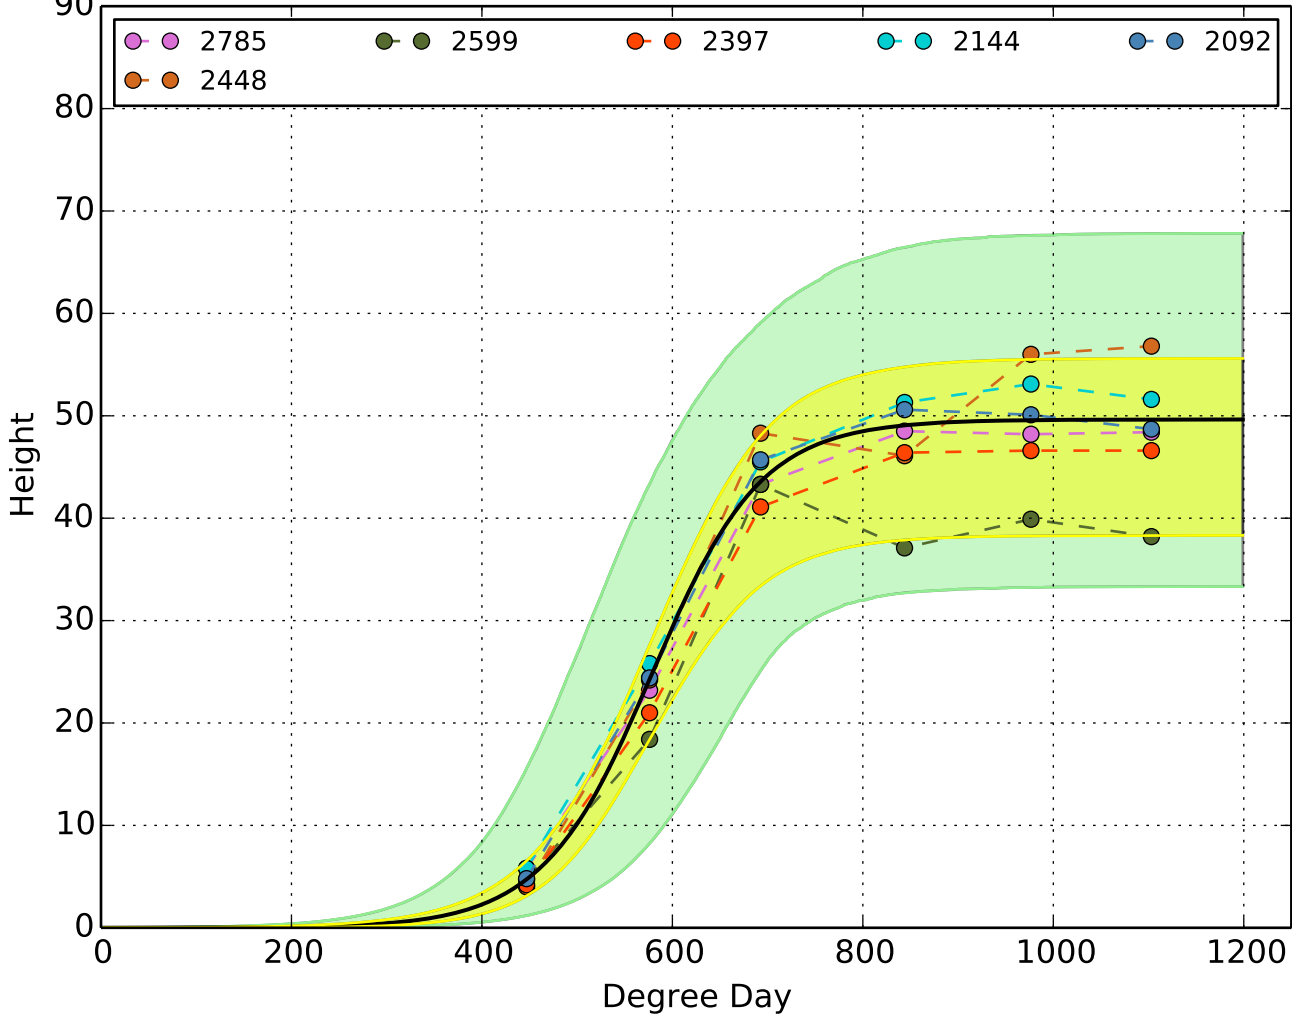

HeightModel3\_v1\_ResErrModel,Treat= UN\_2011,Line 25 (#Inv=6);95CI GrowthCurves

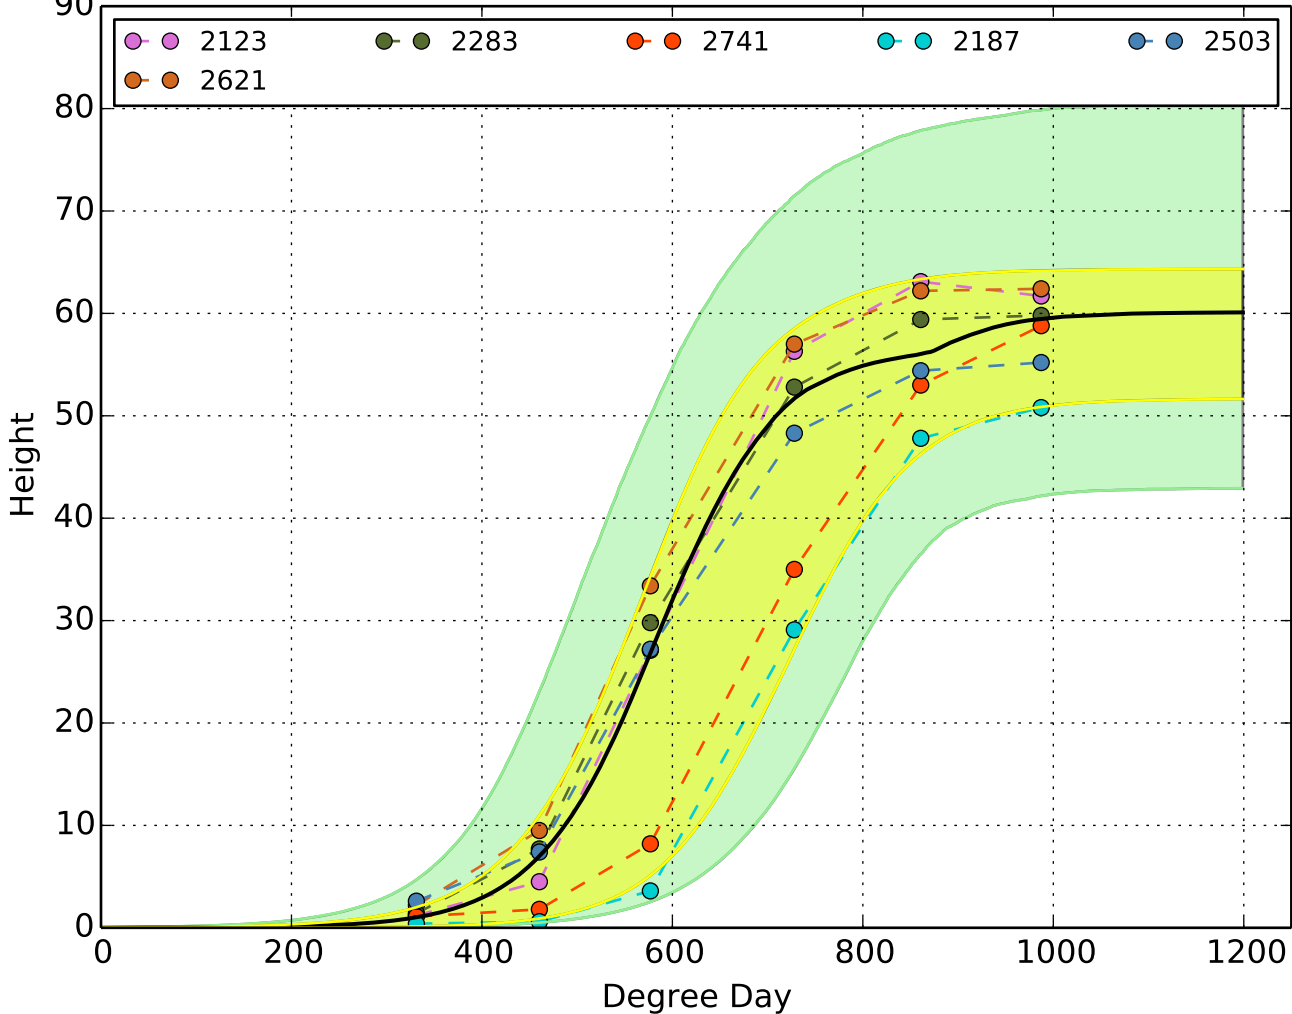

HeightModel3\_v1\_ResErrModel,Treat= UN\_2011,Line 30 (#Inv=6);95CI GrowthCurves

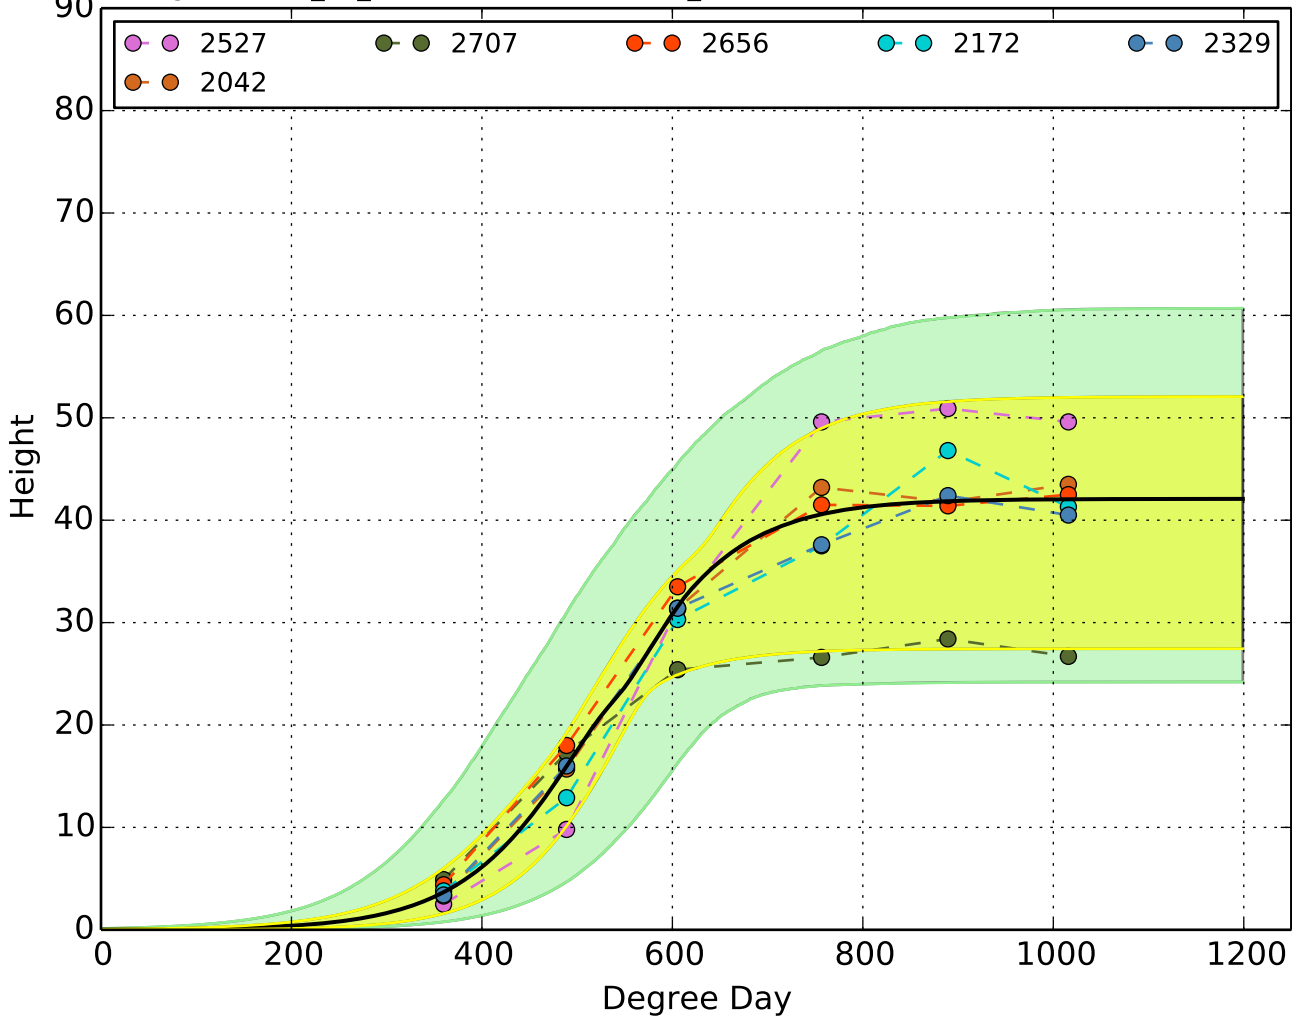

HeightModel3\_v1\_ResErrModel,Treat= UN\_2011,Line 31 (#Inv=6);95CI GrowthCurves

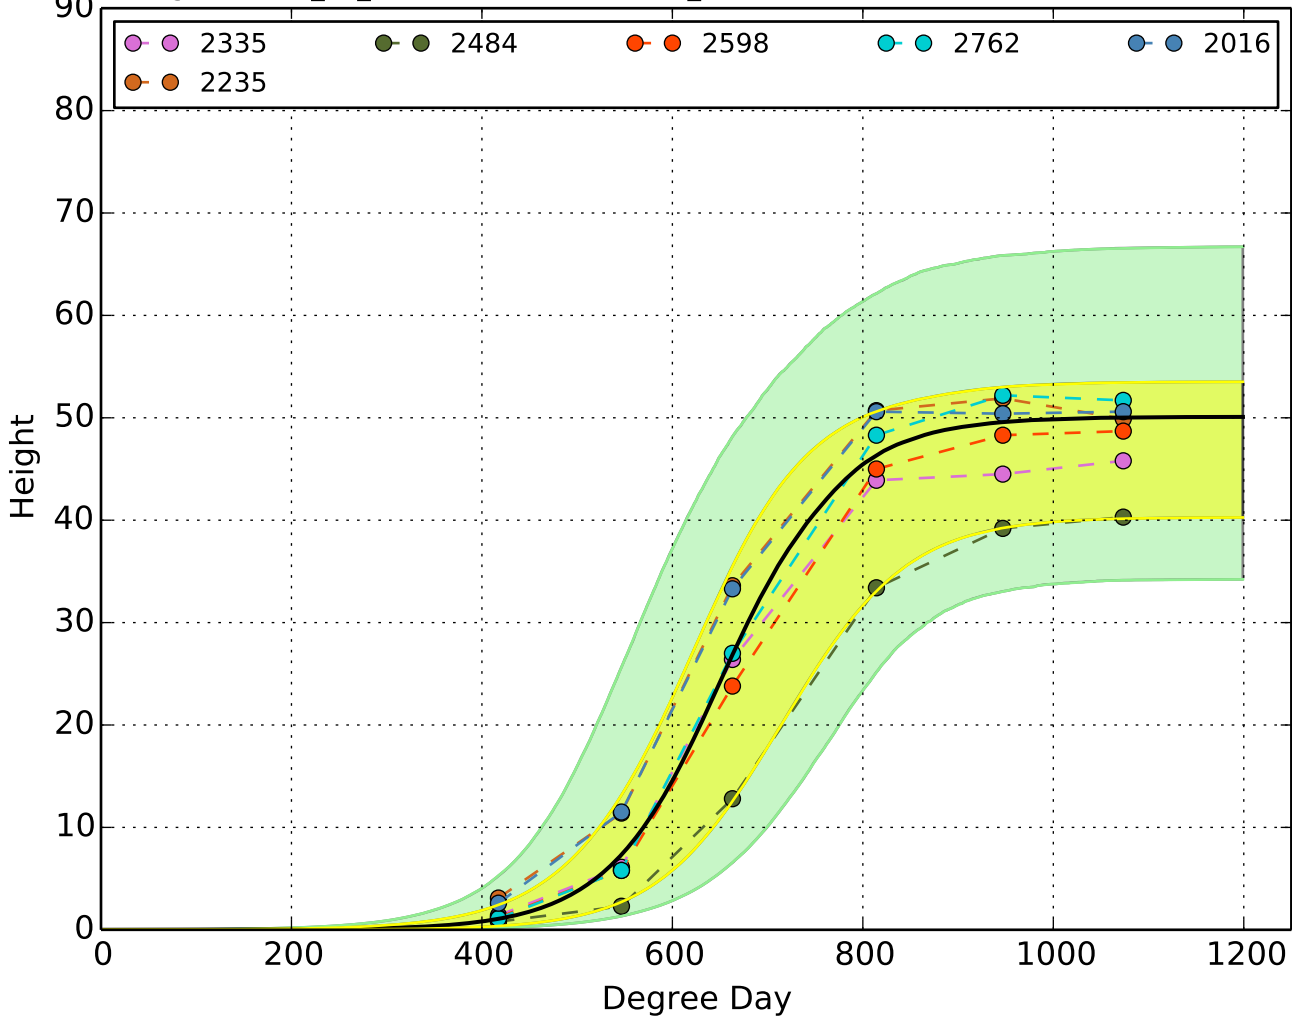

HeightModel3\_v1\_ResErrModel,Treat= UN\_2011,Line 36 (#Inv=12);95CI GrowthCurves

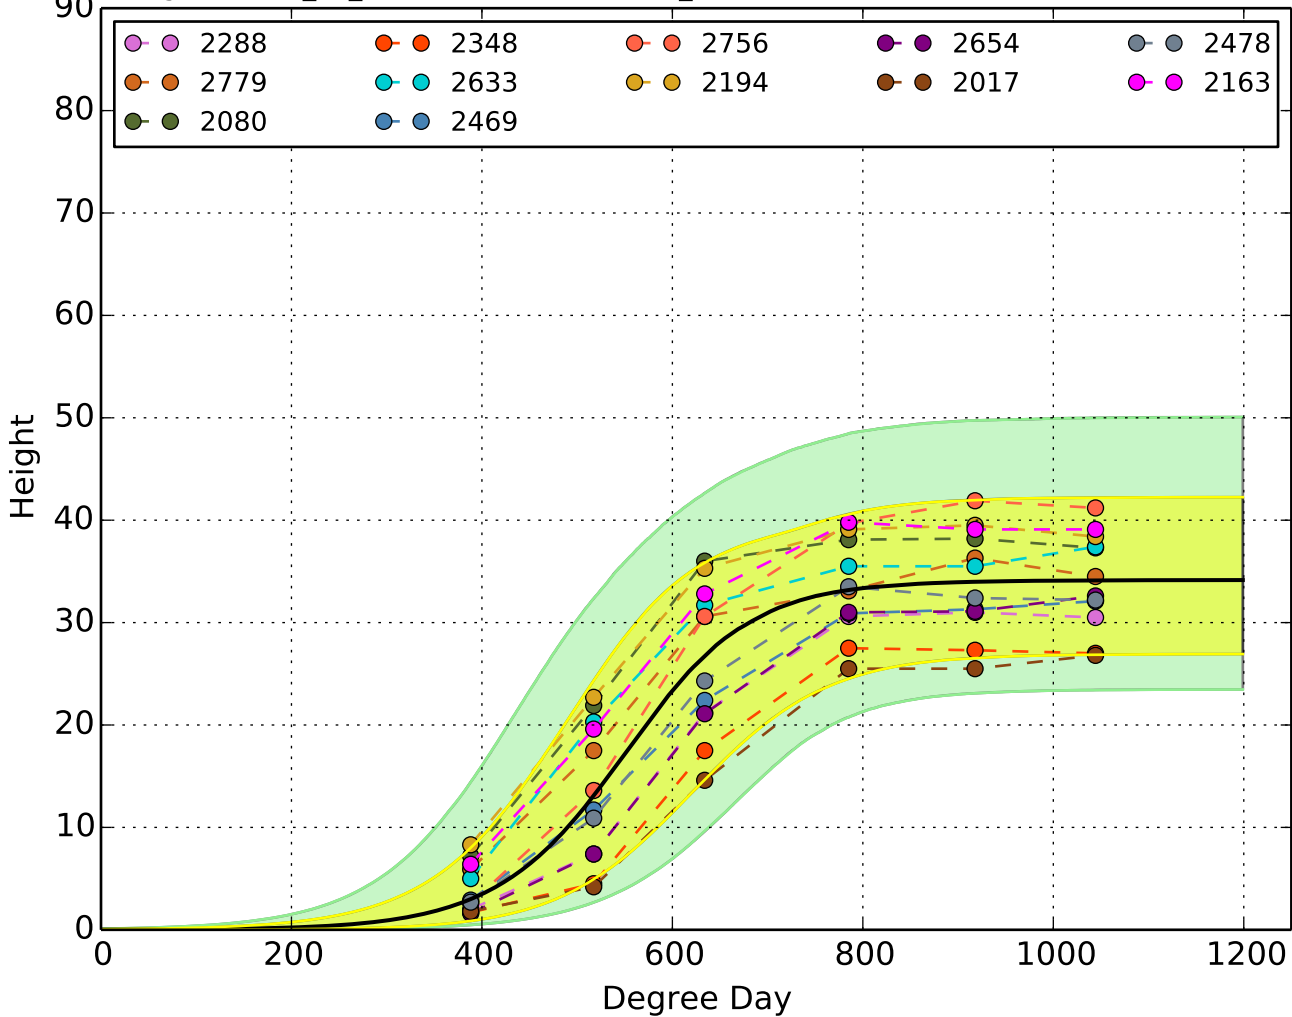

HeightModel3\_v1\_ResErrModel,Treat= UN\_2011,Line 39 (#Inv=4);95CI GrowthCurves

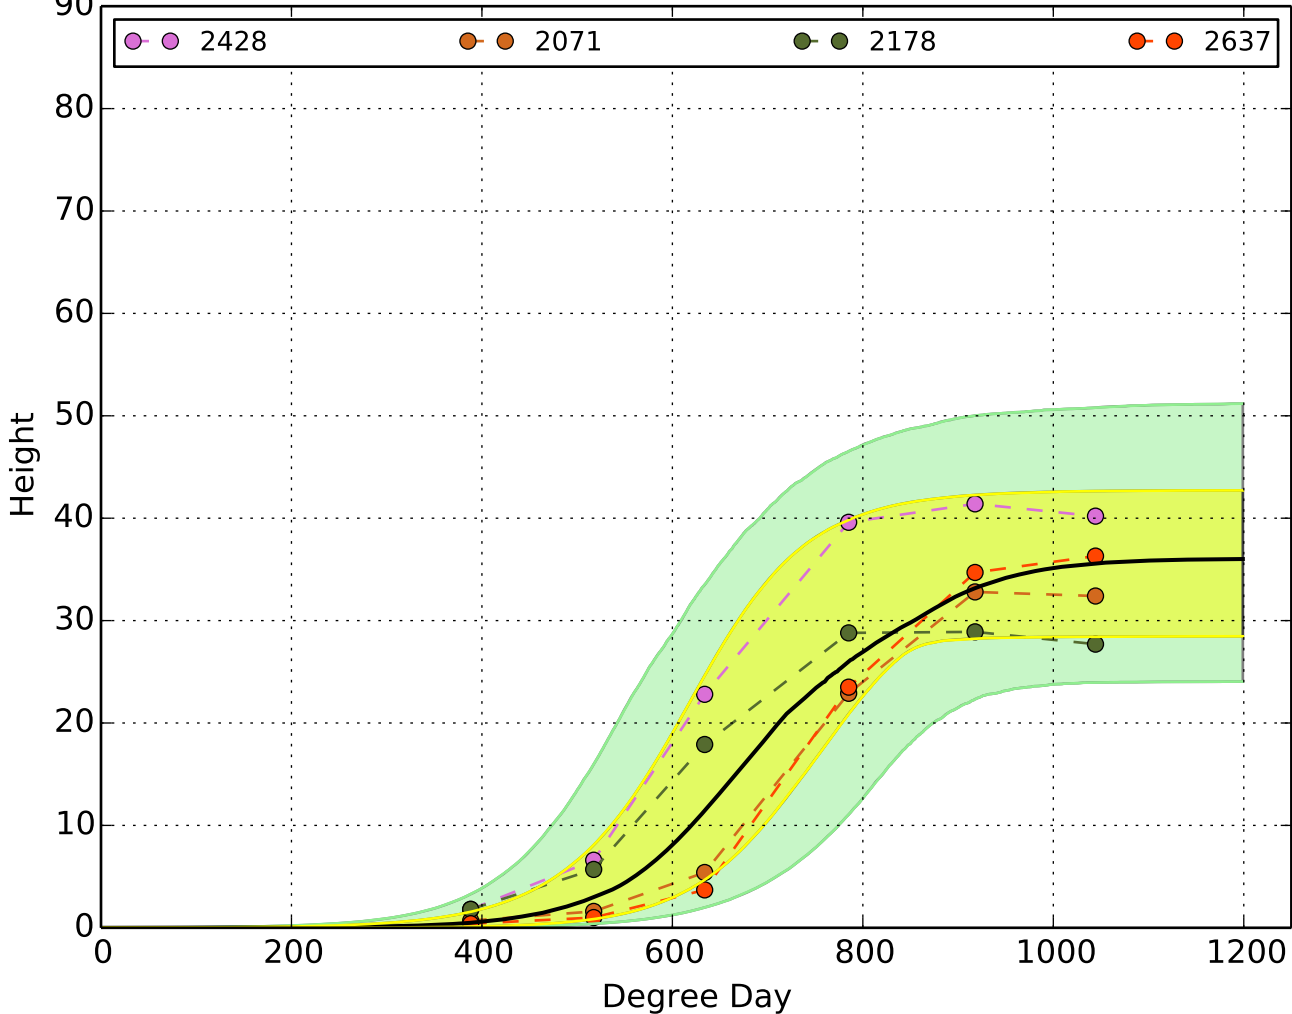

HeightModel3\_v1\_ResErrModel,Treat= UN\_2011,Line 42 (#Inv=6);95CI GrowthCurves

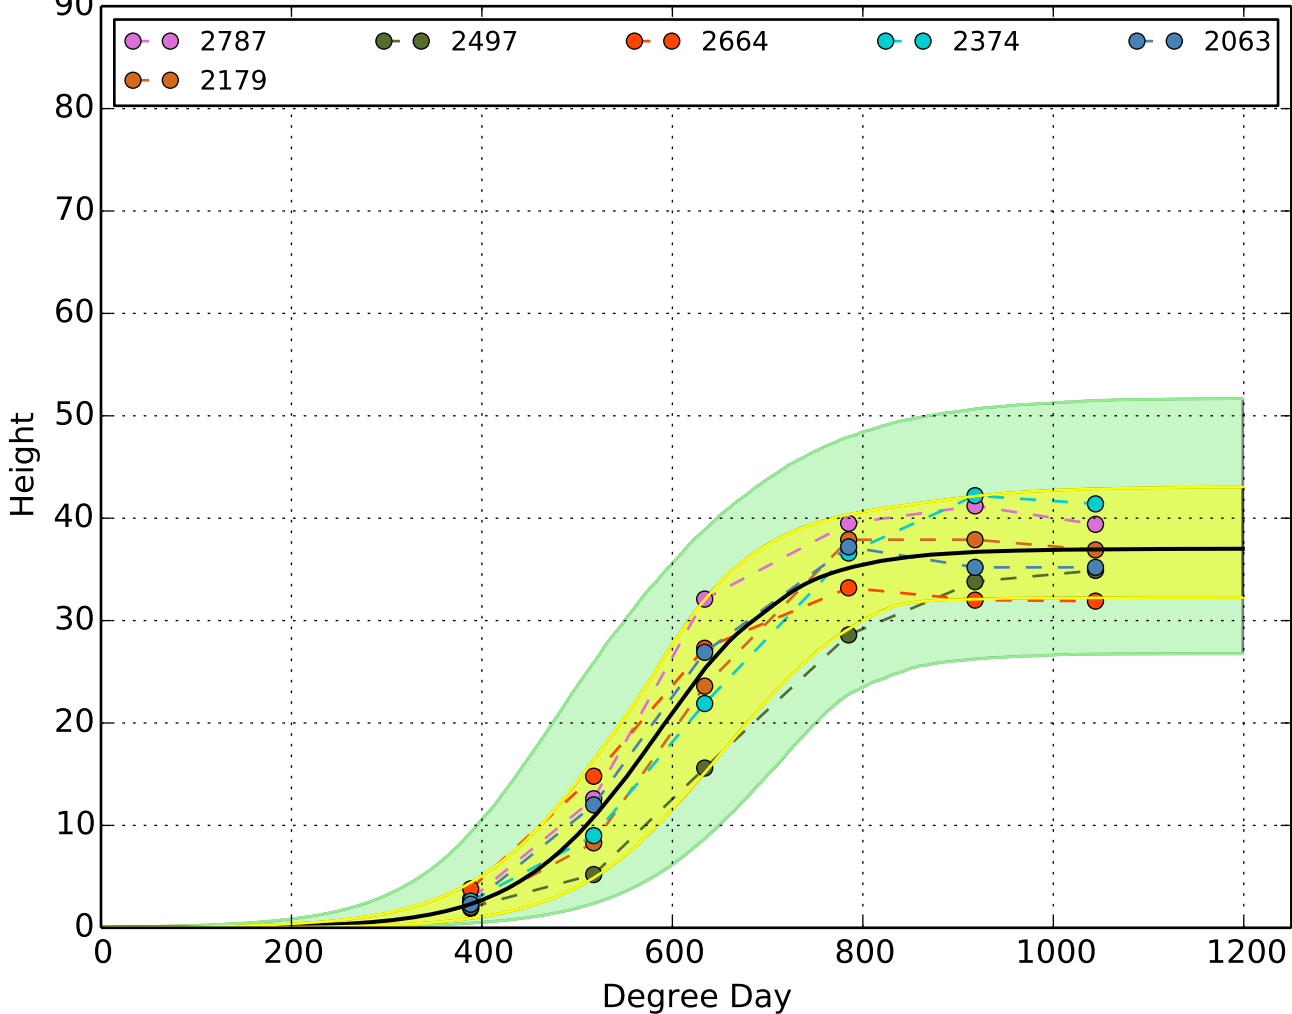

HeightModel3\_v1\_ResErrModel,Treat= UN\_2011,Line 46 (#Inv=4);95CI GrowthCurves

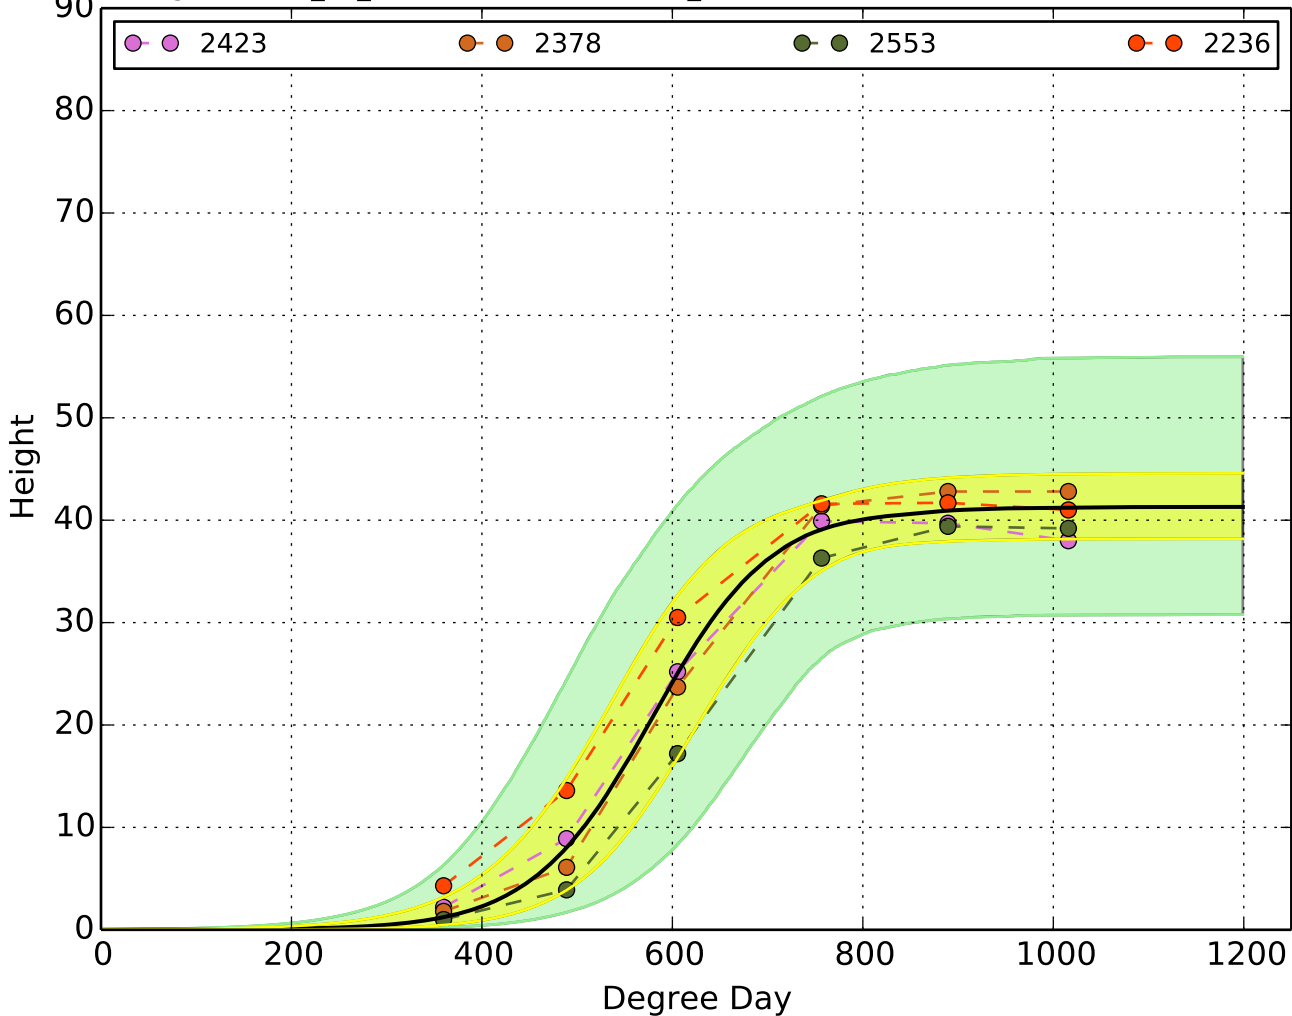



HeightModel3\_v1\_ResErrModel,Treat= UN\_2011,Line 53 (#Inv=9);95CI GrowthCurves

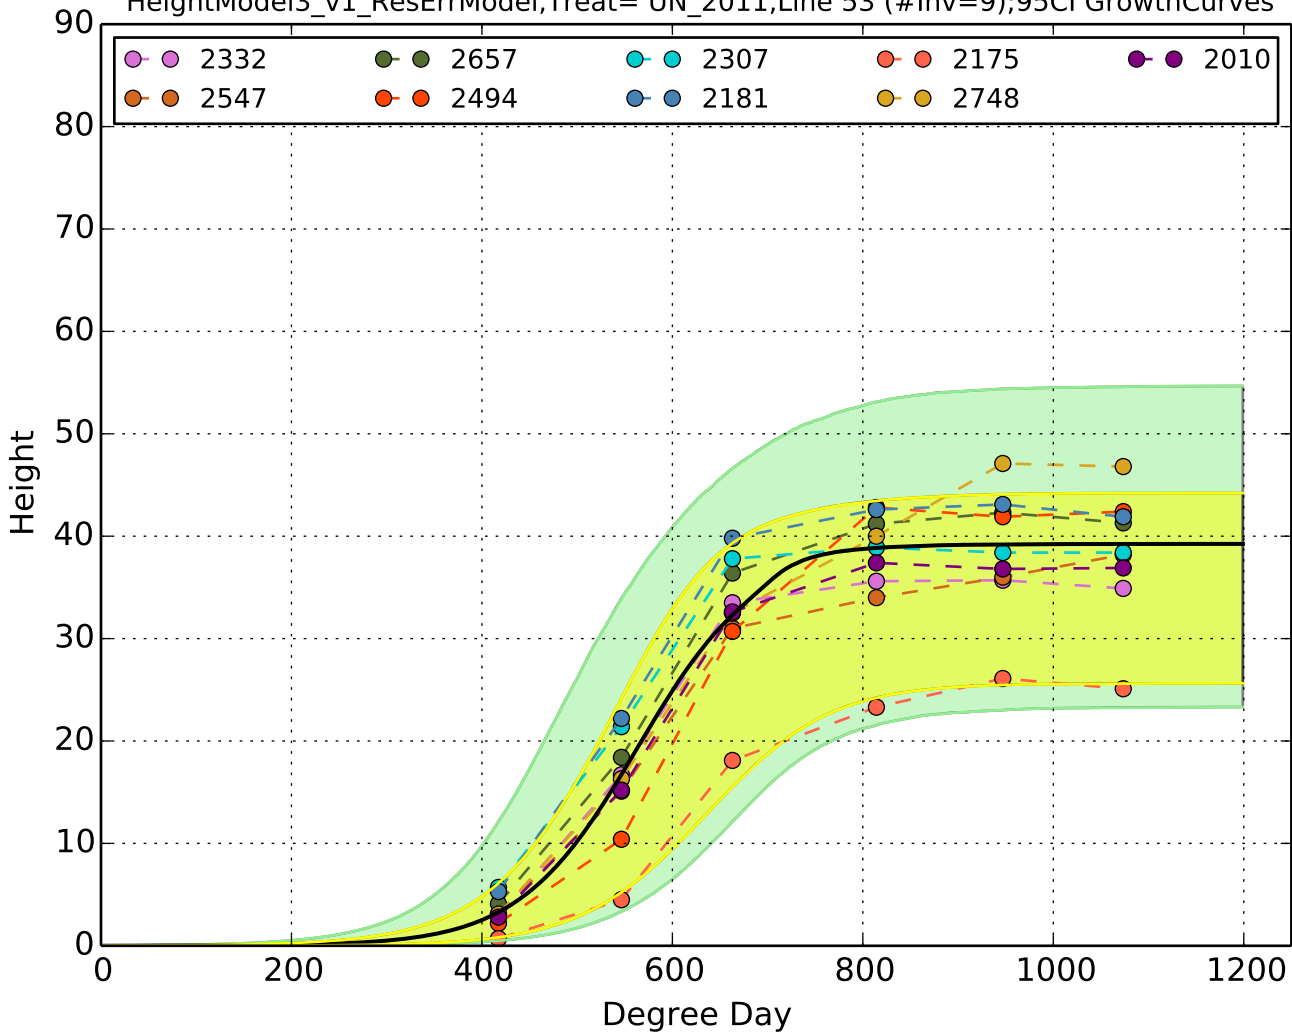

HeightModel3\_v1\_ResErrModel,Treat= UN\_2011,Line 60 (#Inv=6);95CI GrowthCurves

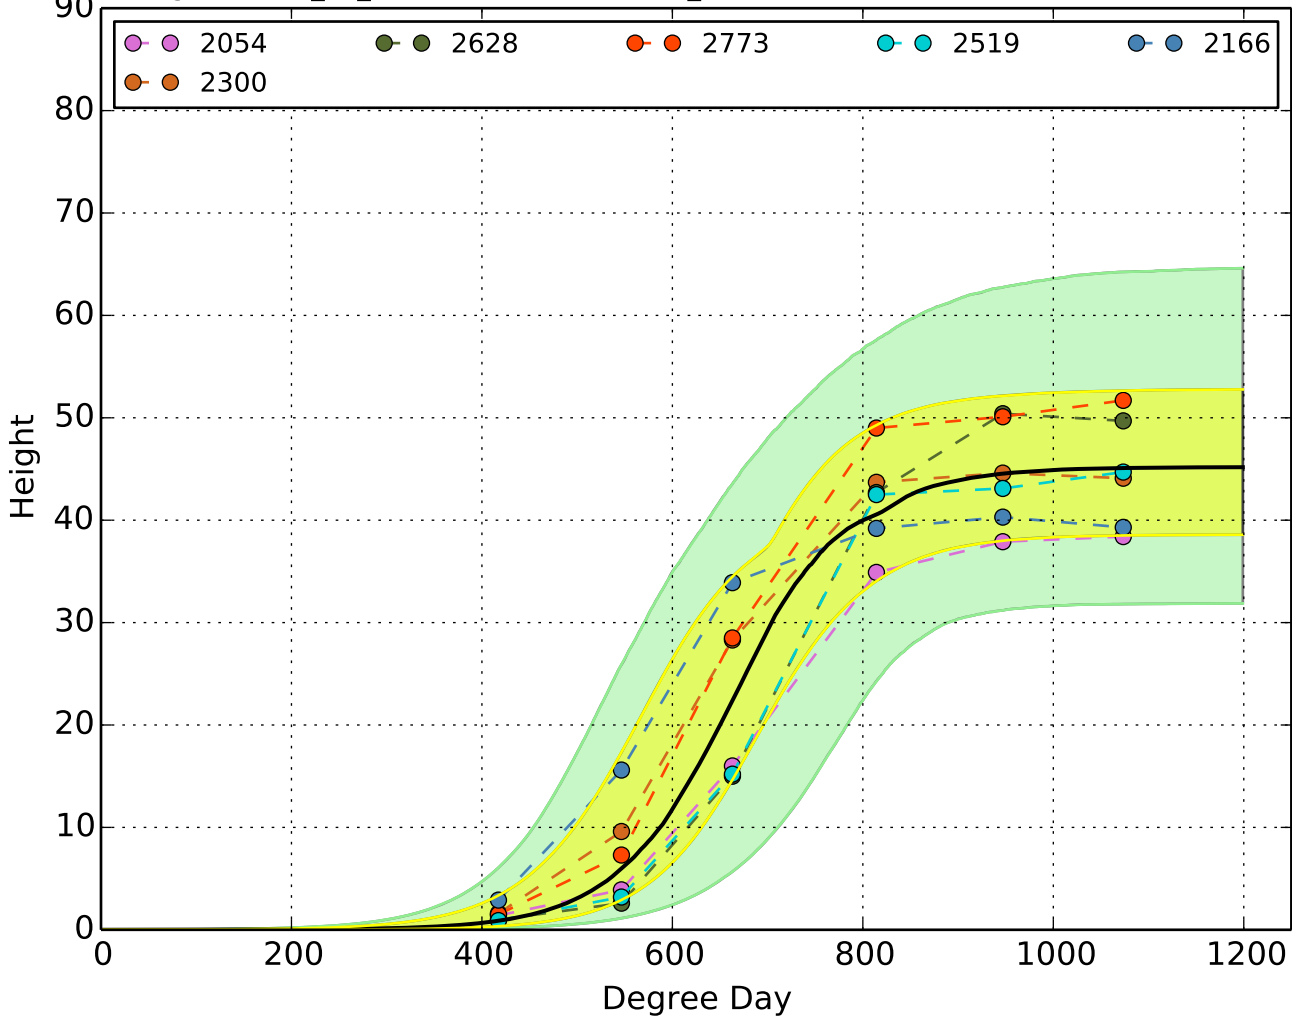

HeightModel3\_v1\_ResErrModel,Treat= UN\_2011,Line 63 (#Inv=6);95CI GrowthCurves

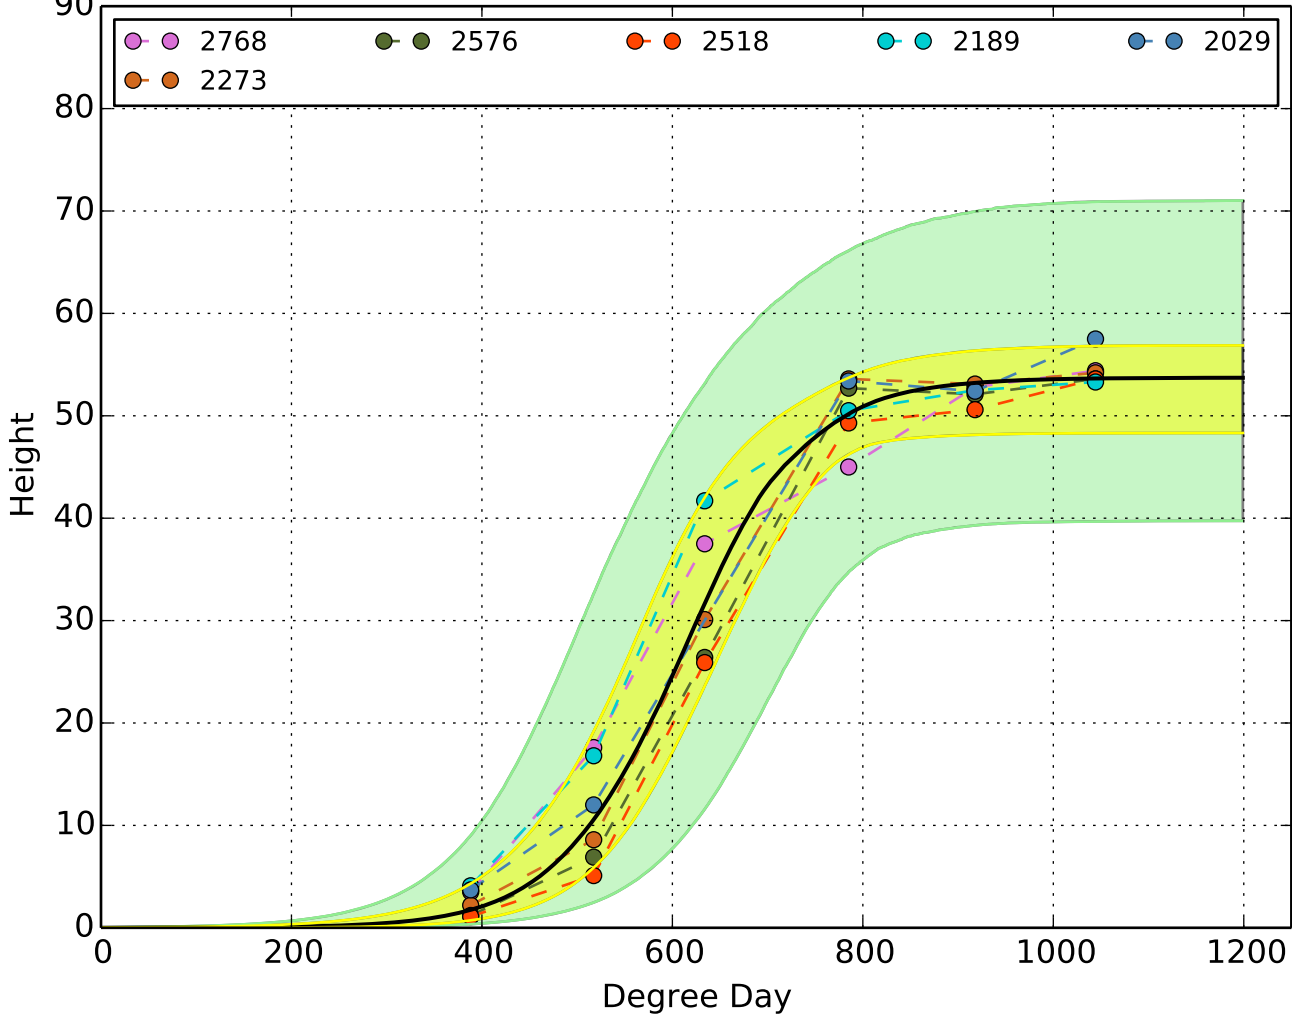

HeightModel3\_v1\_ResErrModel,Treat= UN\_2011,Line 65 (#Inv=6);95CI GrowthCurves

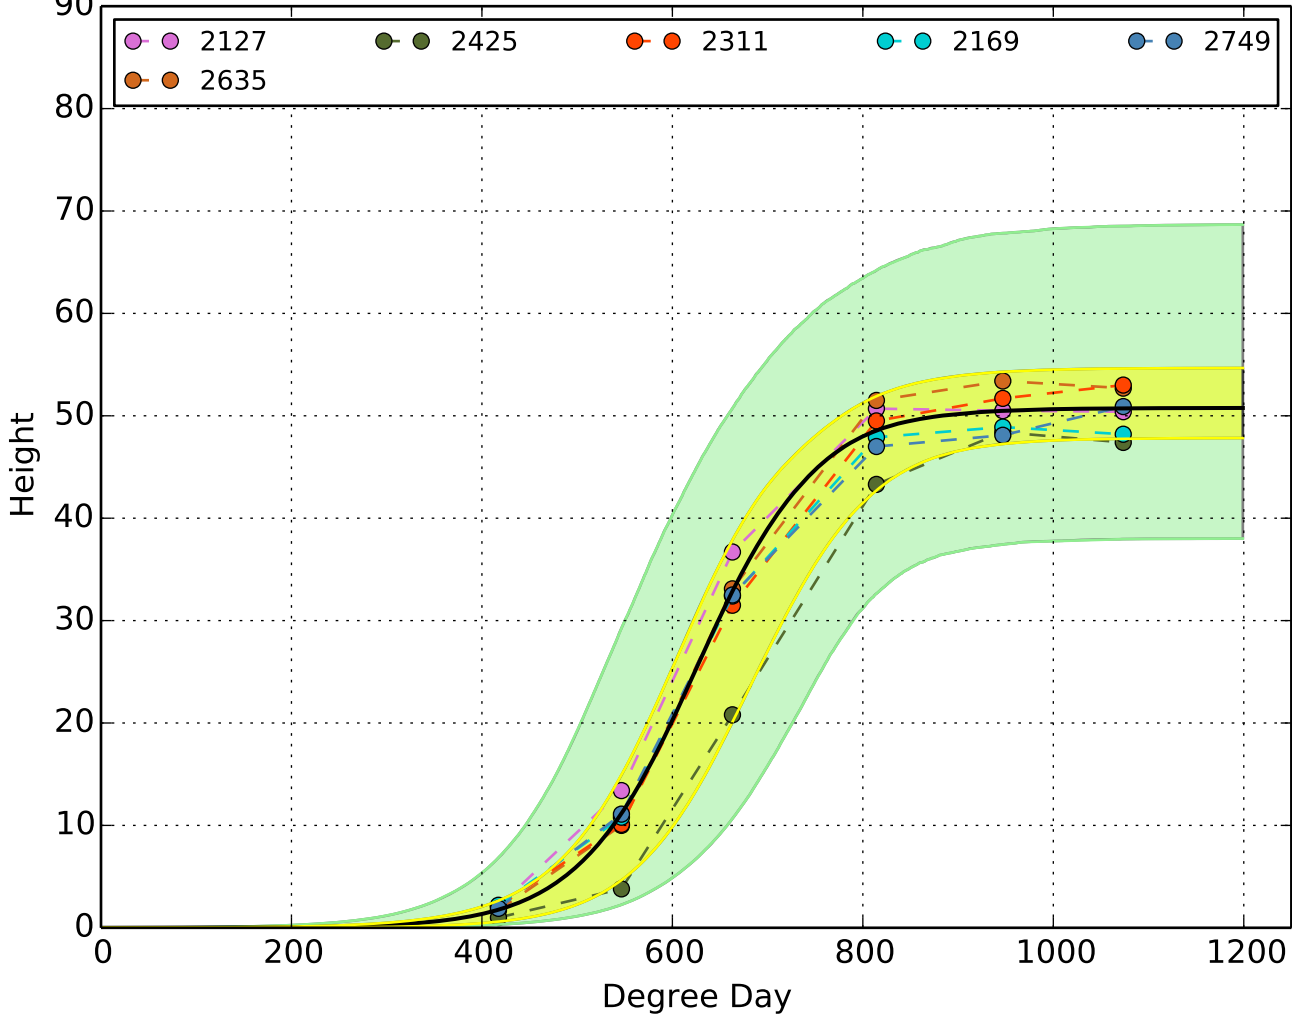

HeightModel3\_v1\_ResErrModel,Treat= UN\_2011,Line 66 (#Inv=3);95CI GrowthCurves

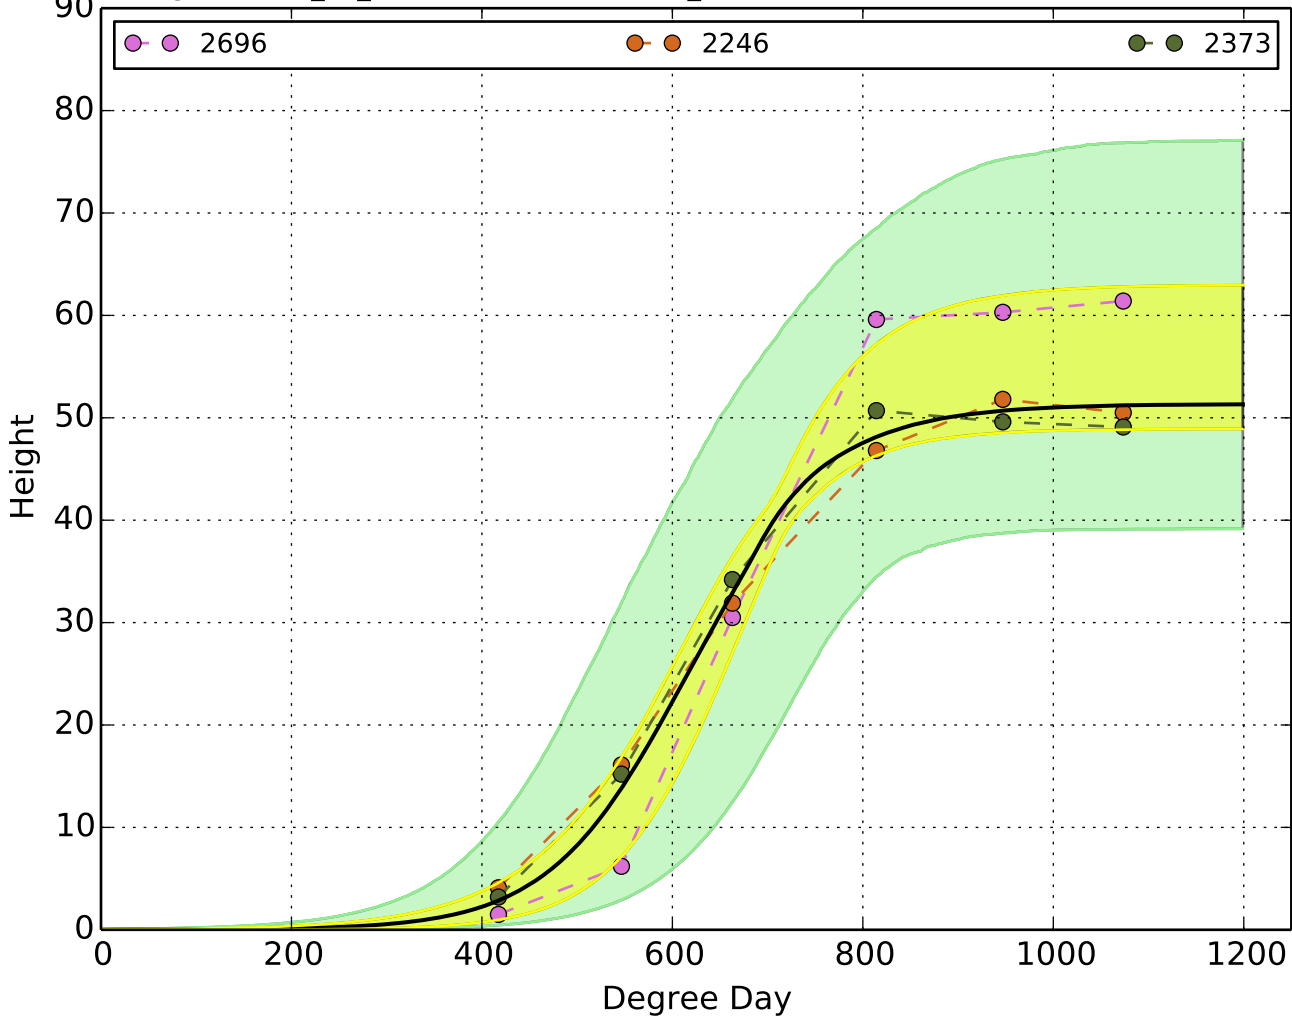

HeightModel3\_v1\_ResErrModel,Treat= UN\_2011,Line 69 (#Inv=3);95CI GrowthCurves

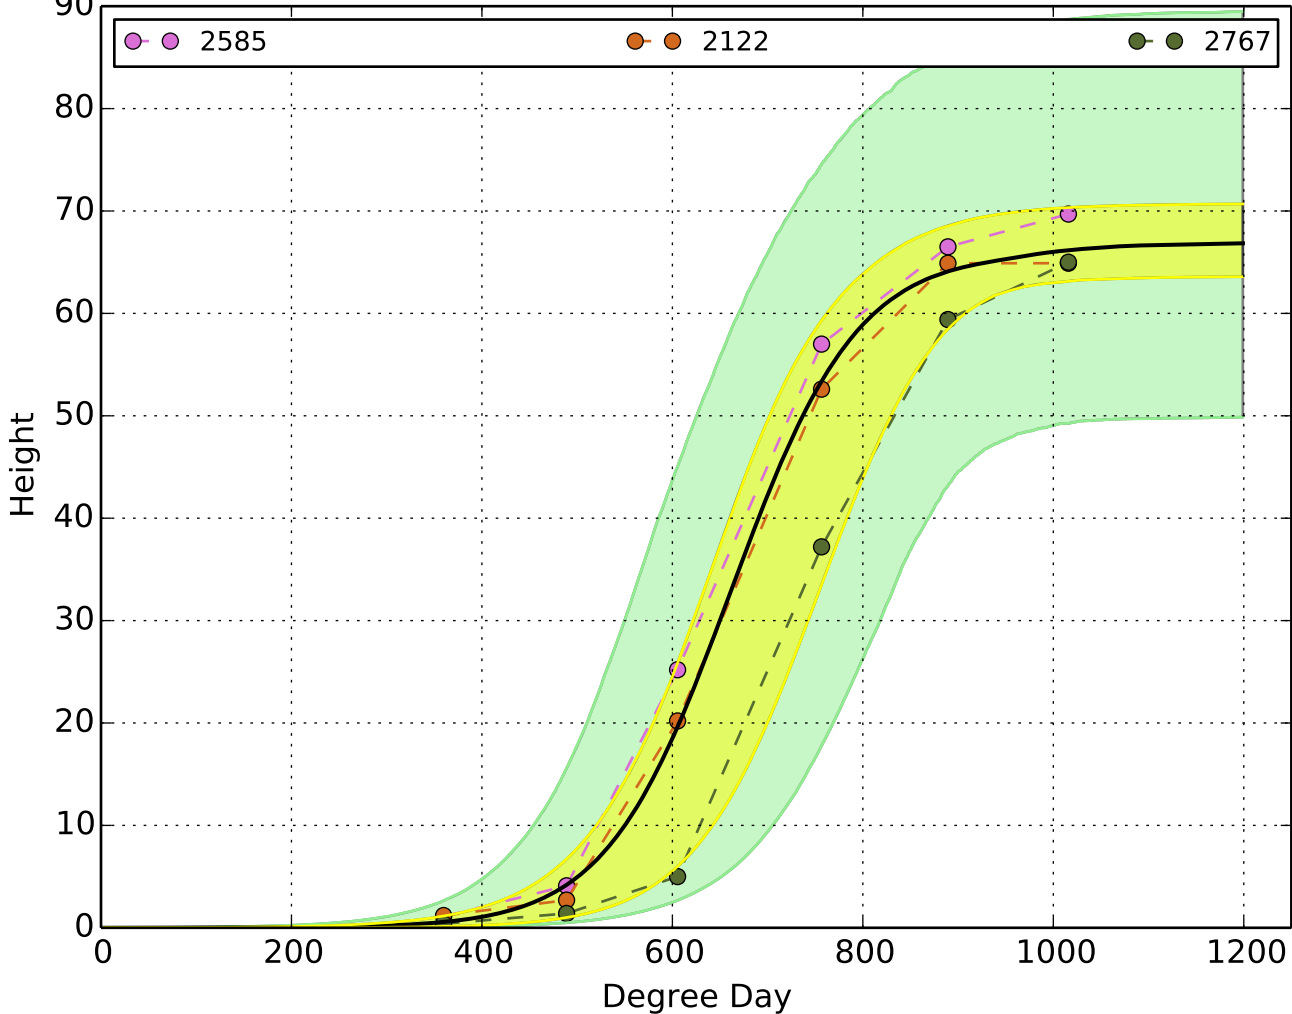

HeightModel3\_v1\_ResErrModel,Treat= UN\_2011,Line 70 (#Inv=6);95CI GrowthCurves

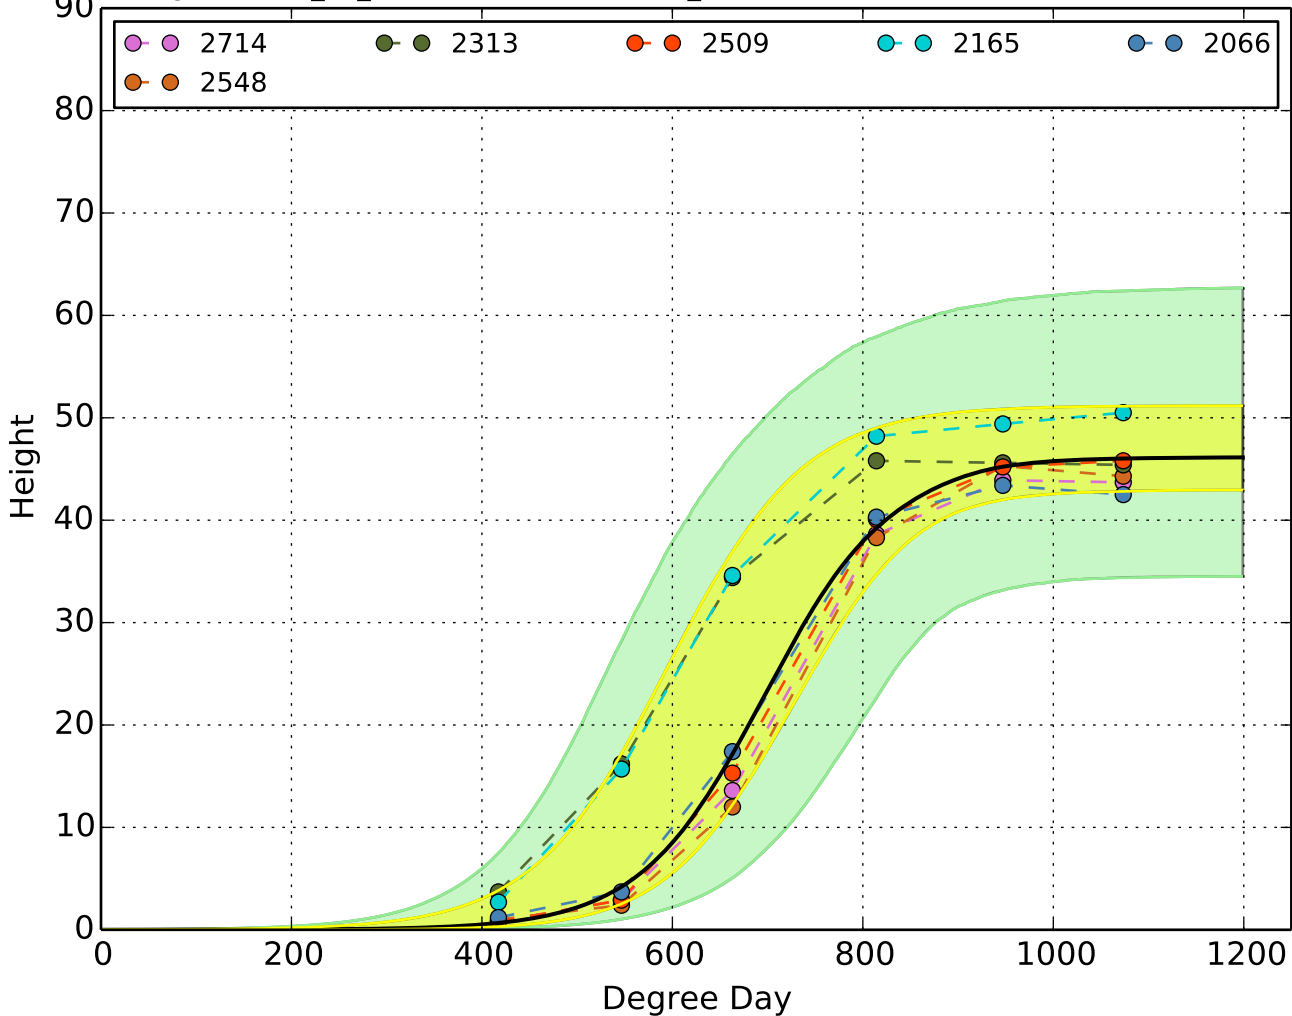

HeightModel3\_v1\_ResErrModel,Treat= UN\_2011,Line 73 (#Inv=6);95CI GrowthCurves

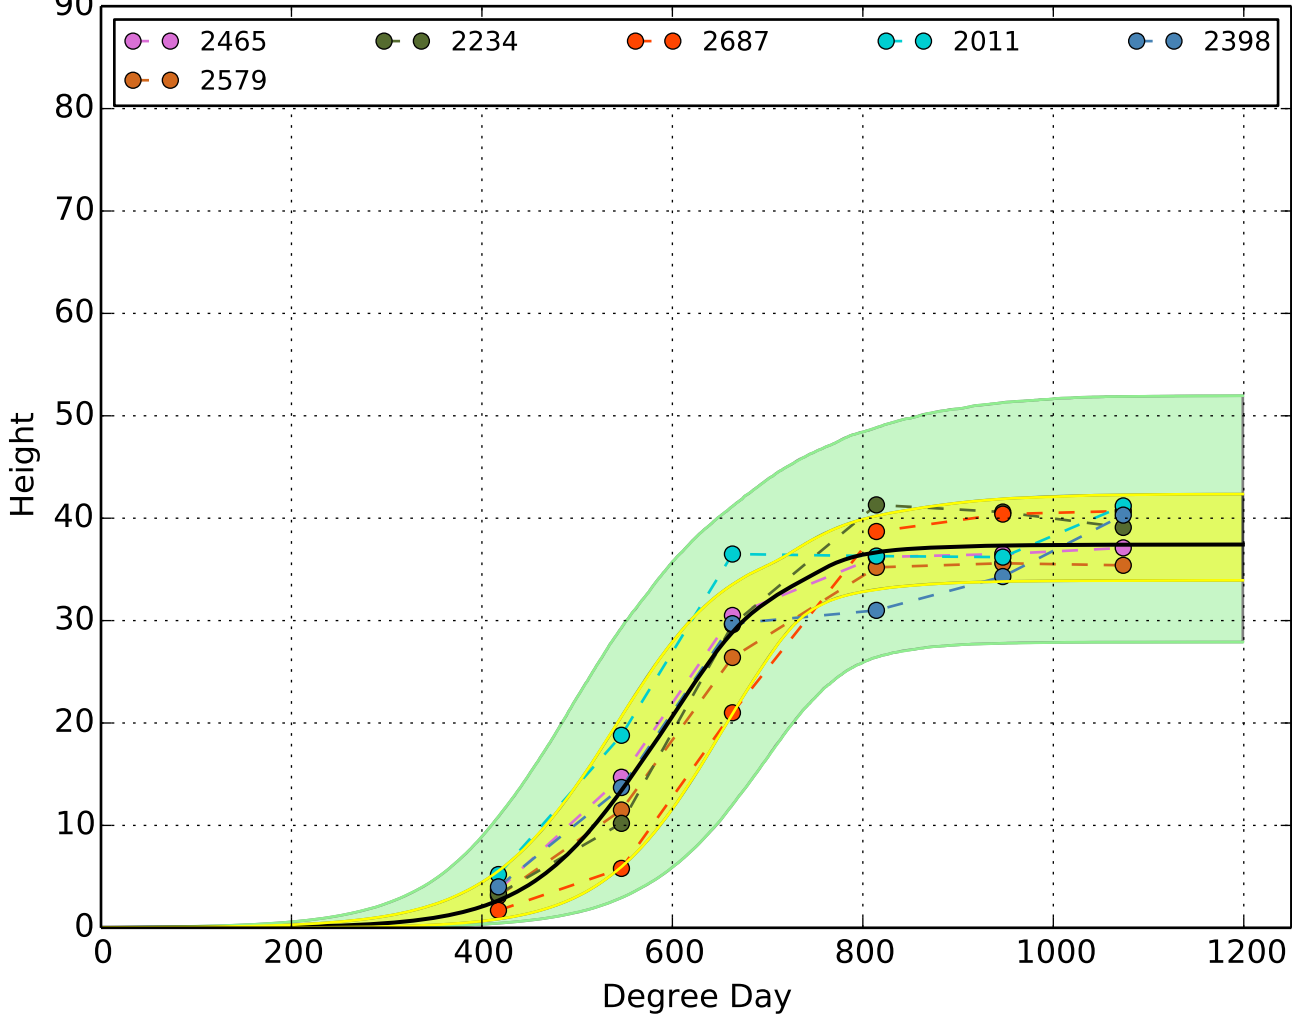



HeightModel3\_v1\_ResErrModel,Treat= UN\_2011,Line 76 (#Inv=5);95CI GrowthCurves

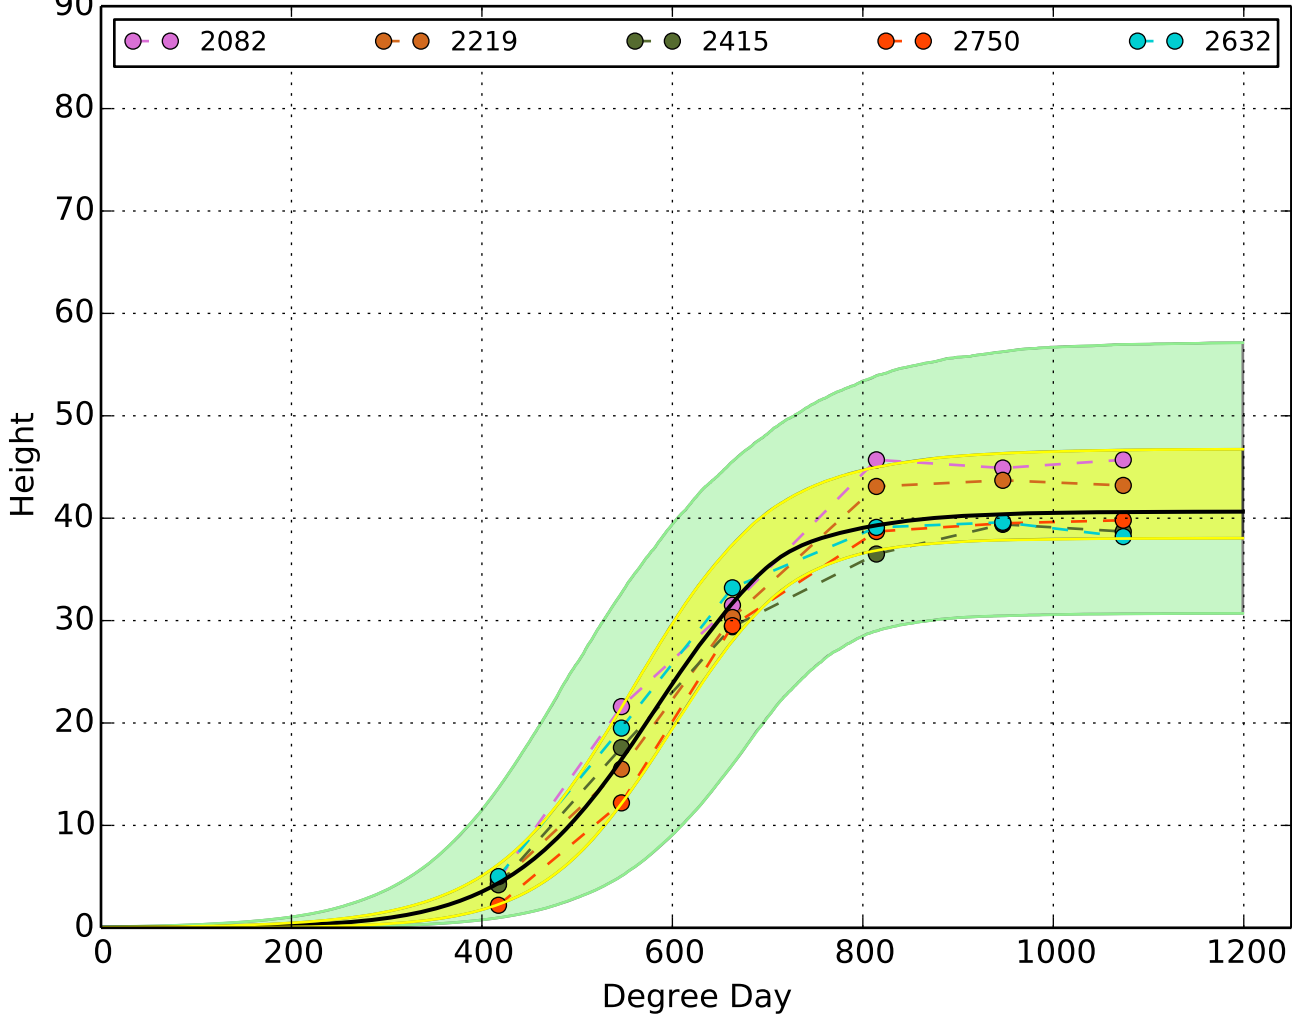

HeightModel3\_v1\_ResErrModel,Treat= UN\_2011,Line 80 (#Inv=4);95CI GrowthCurves

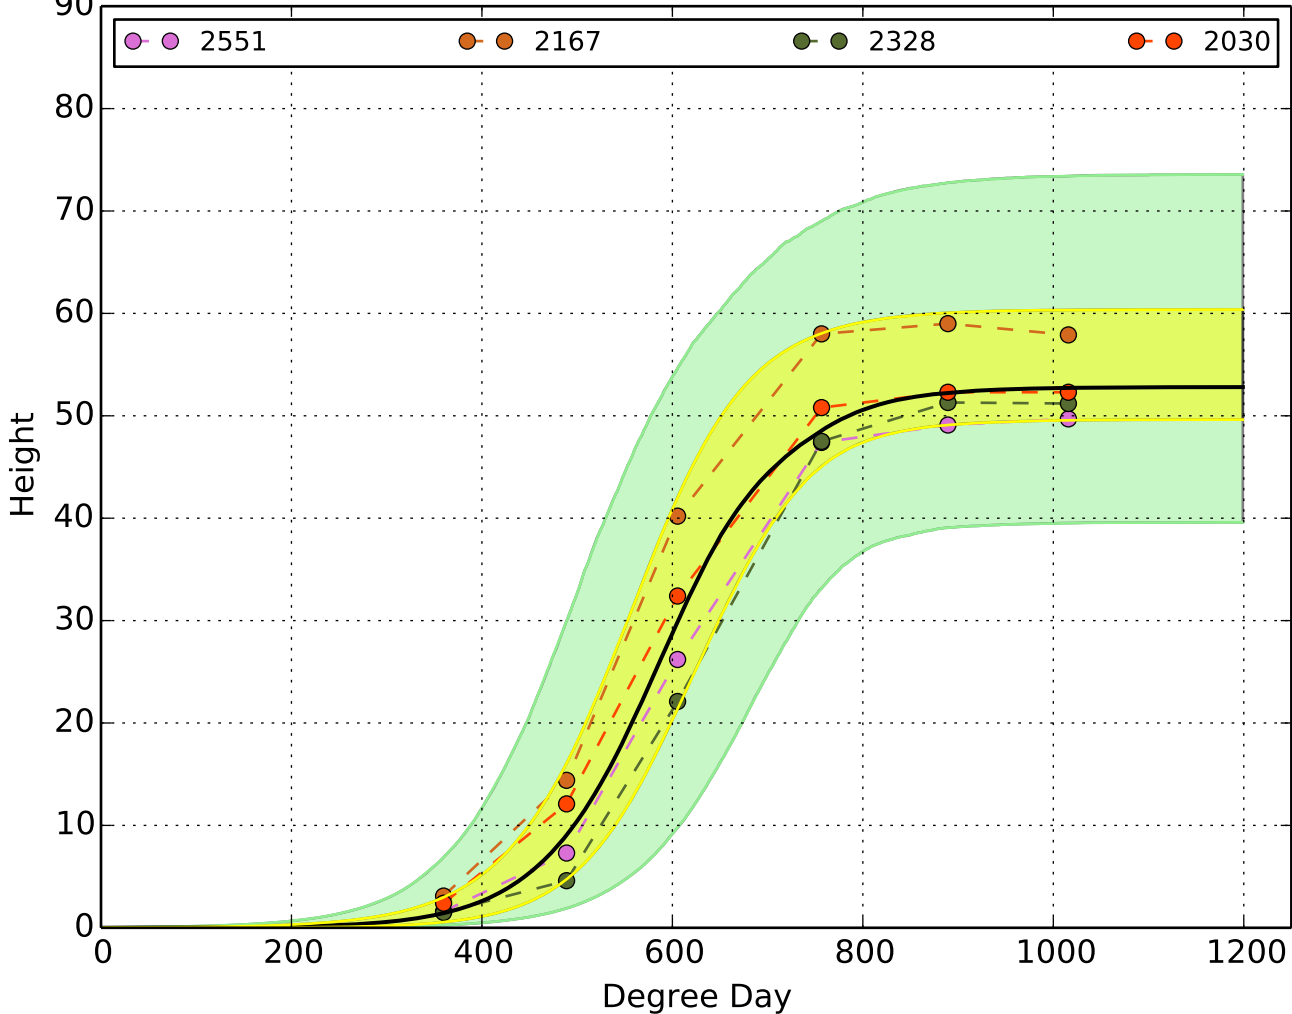

HeightModel3\_v1\_ResErrModel,Treat= UN\_2011,Line 89 (#Inv=5);95CI GrowthCurves

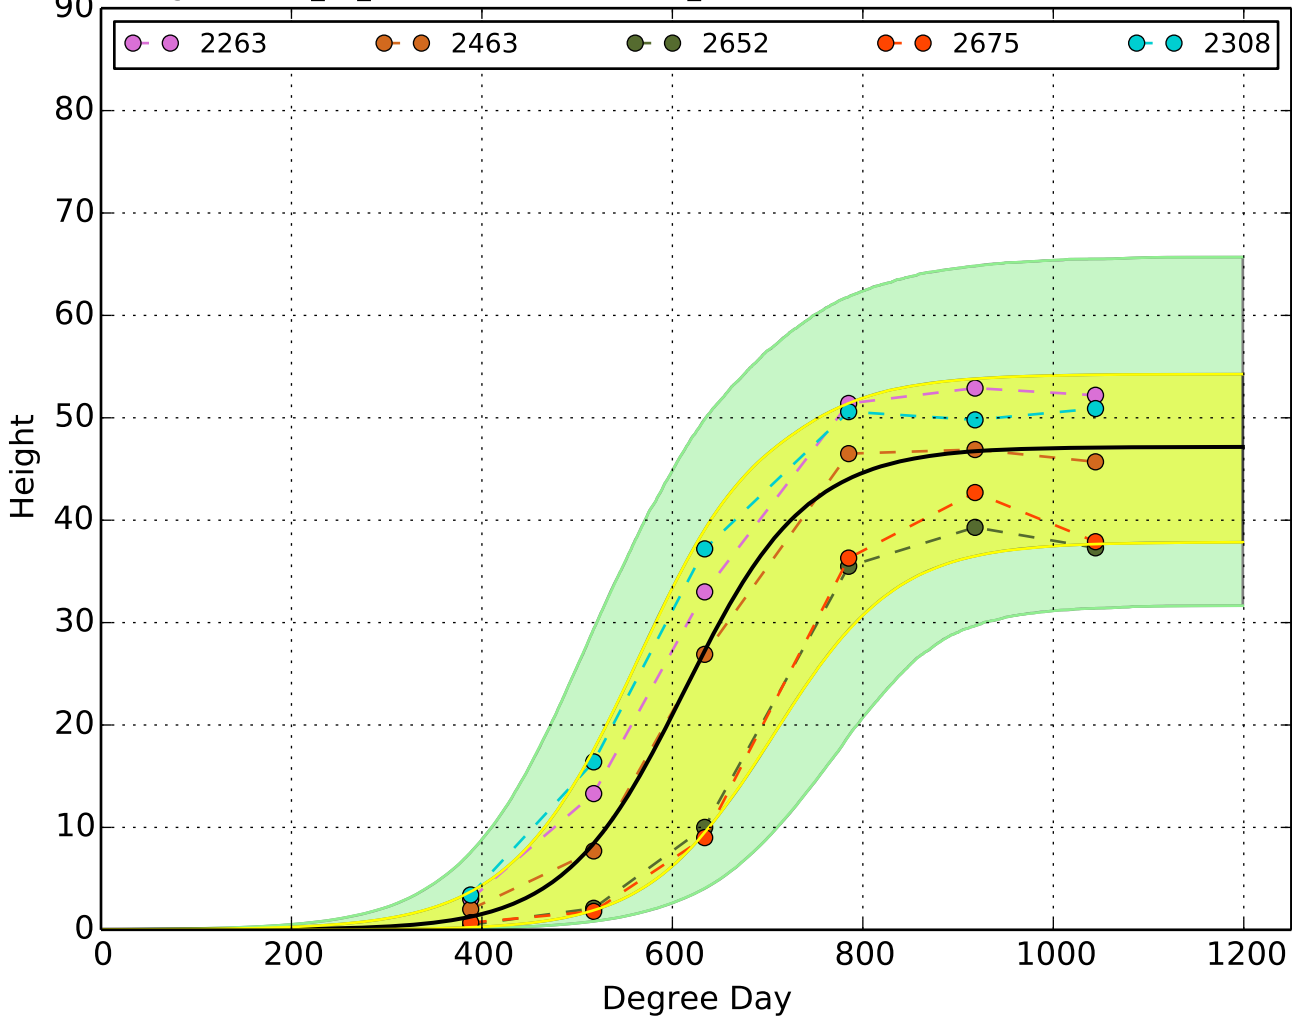

HeightModel3\_v1\_ResErrModel,Treat= UN\_2011,Line 93 (#Inv=5);95CI GrowthCurves

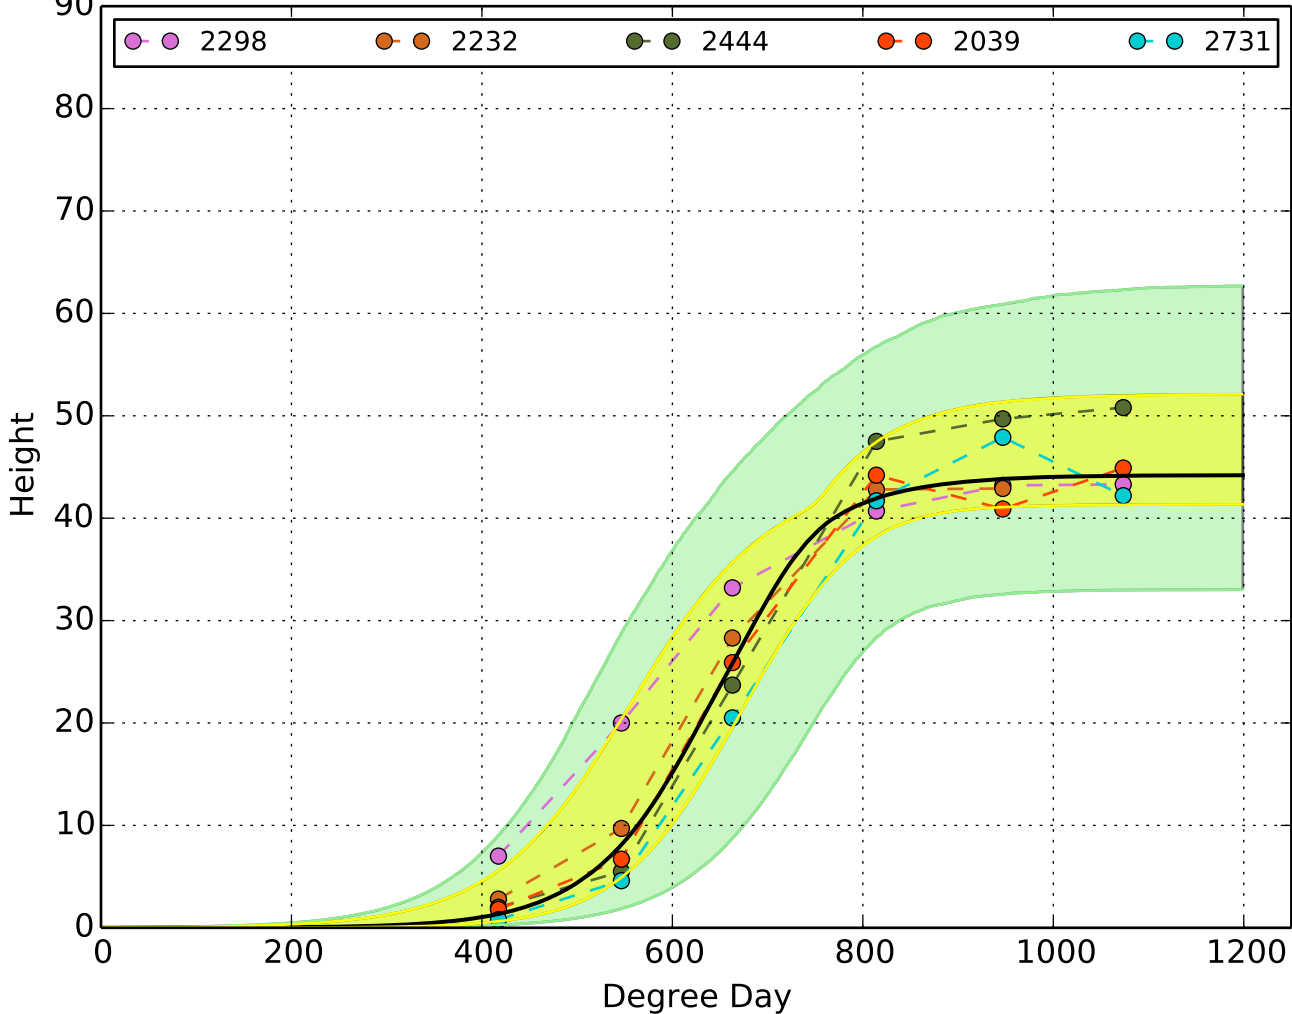

HeightModel3\_v1\_ResErrModel,Treat= UN\_2011,Line 103 (#Inv=6);95CI GrowthCurves

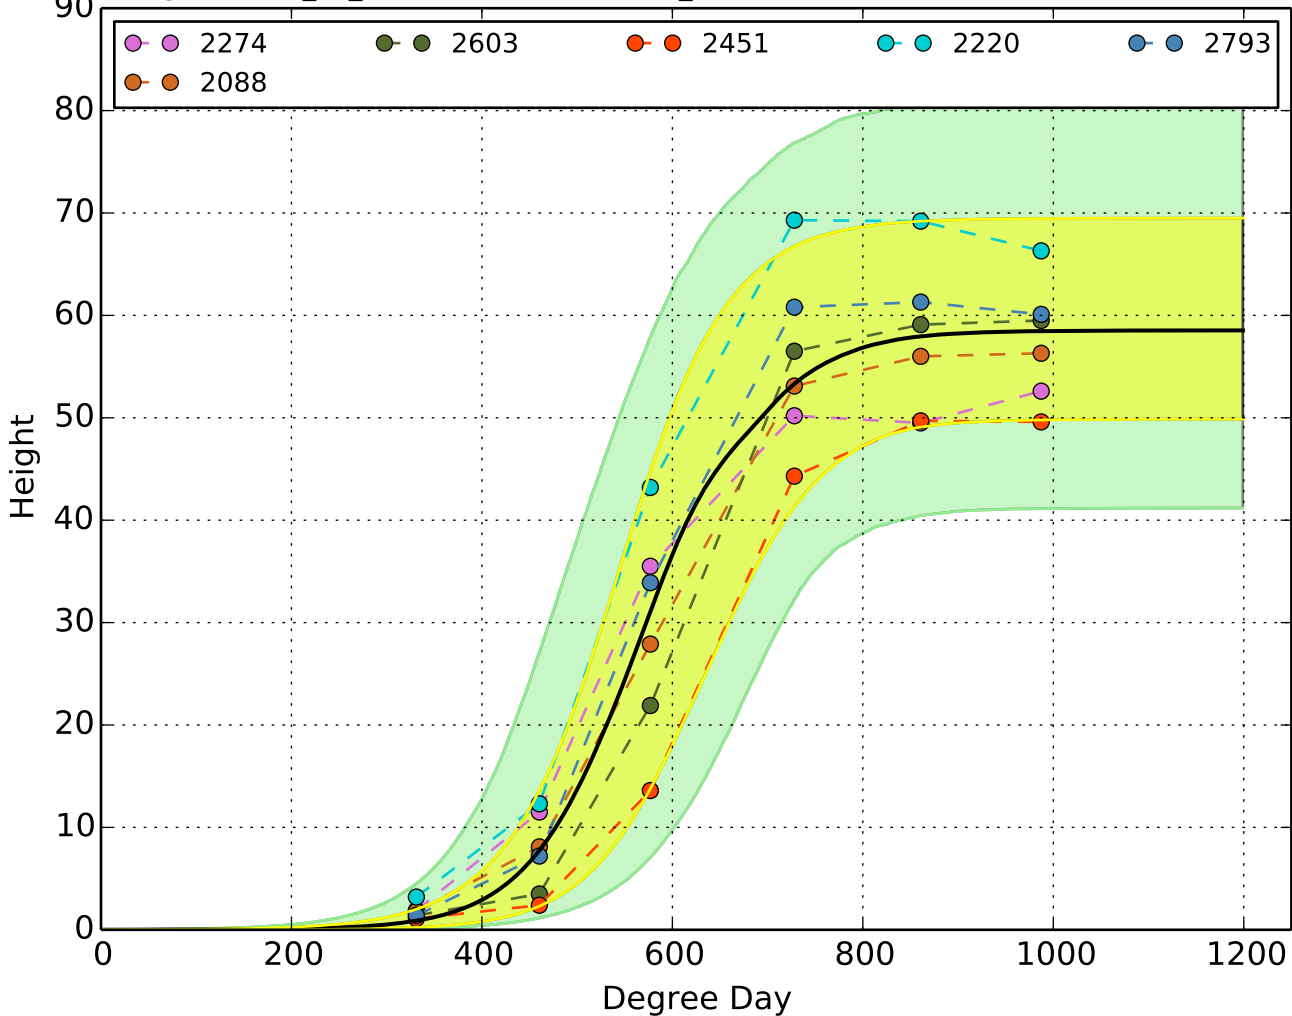

HeightModel3\_v1\_ResErrModel,Treat= UN\_2011,Line 115 (#Inv=6);95CI GrowthCurves

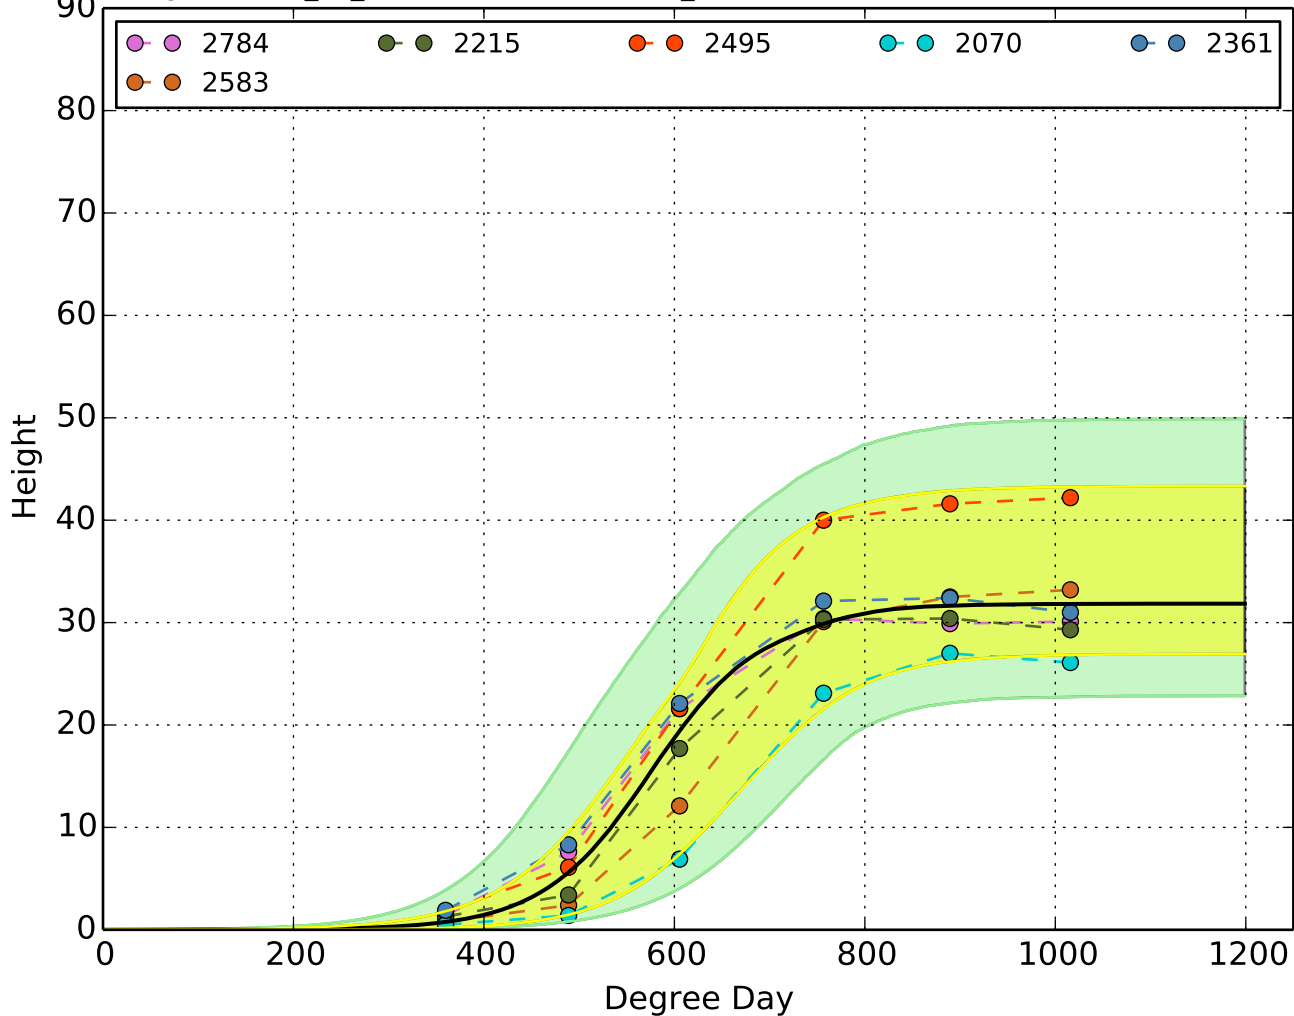

HeightModel3\_v1\_ResErrModel,Treat= UN\_2011,Line 124 (#Inv=5);95CI GrowthCurves

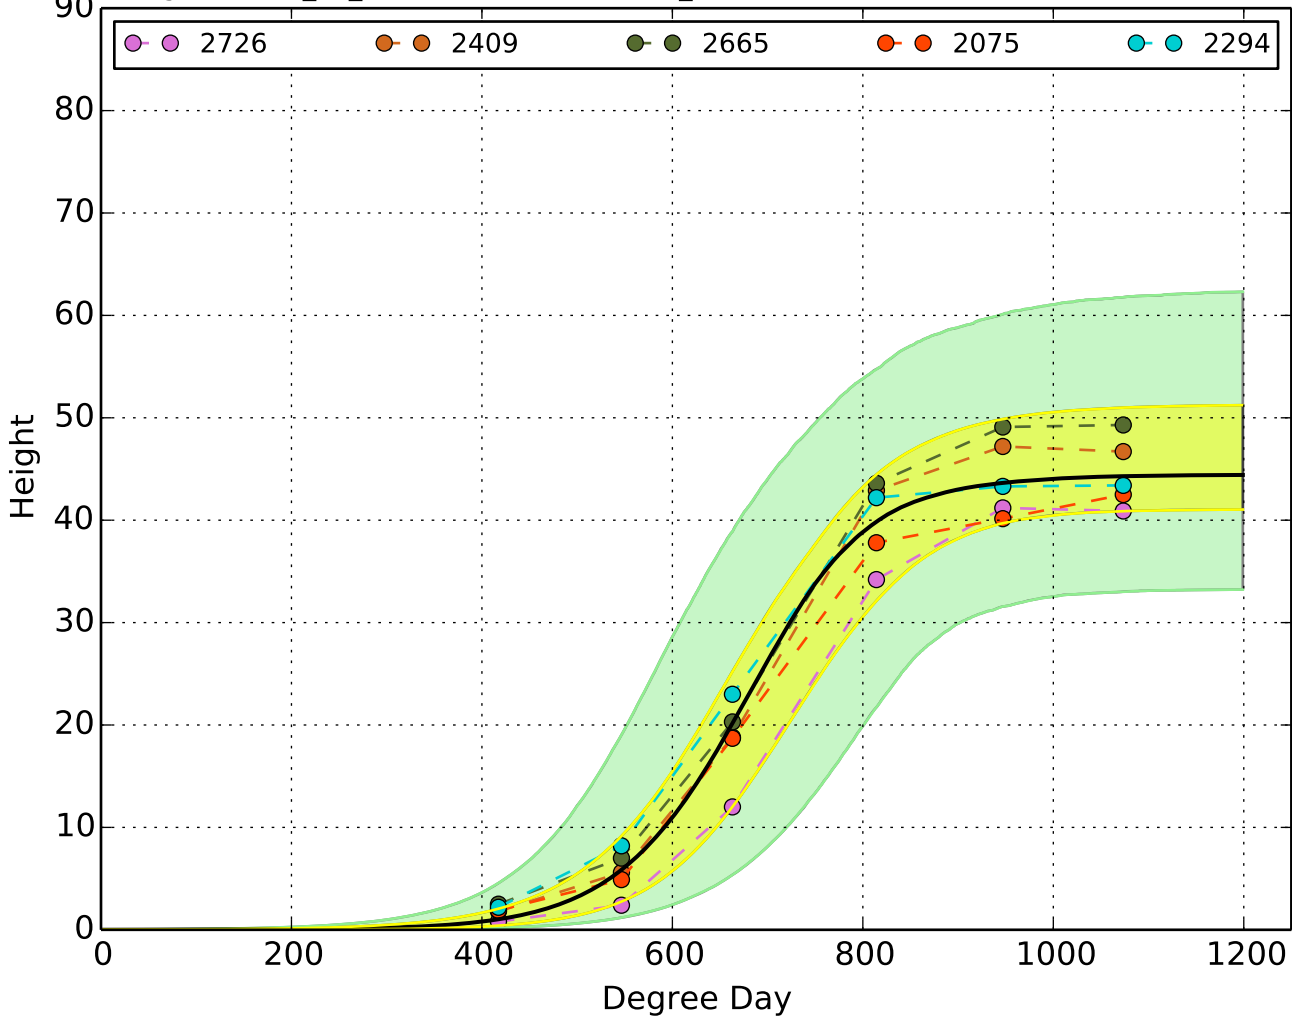

HeightModel3\_v1\_ResErrModel,Treat= UN\_2011,Line 131 (#Inv=5);95CI GrowthCurves

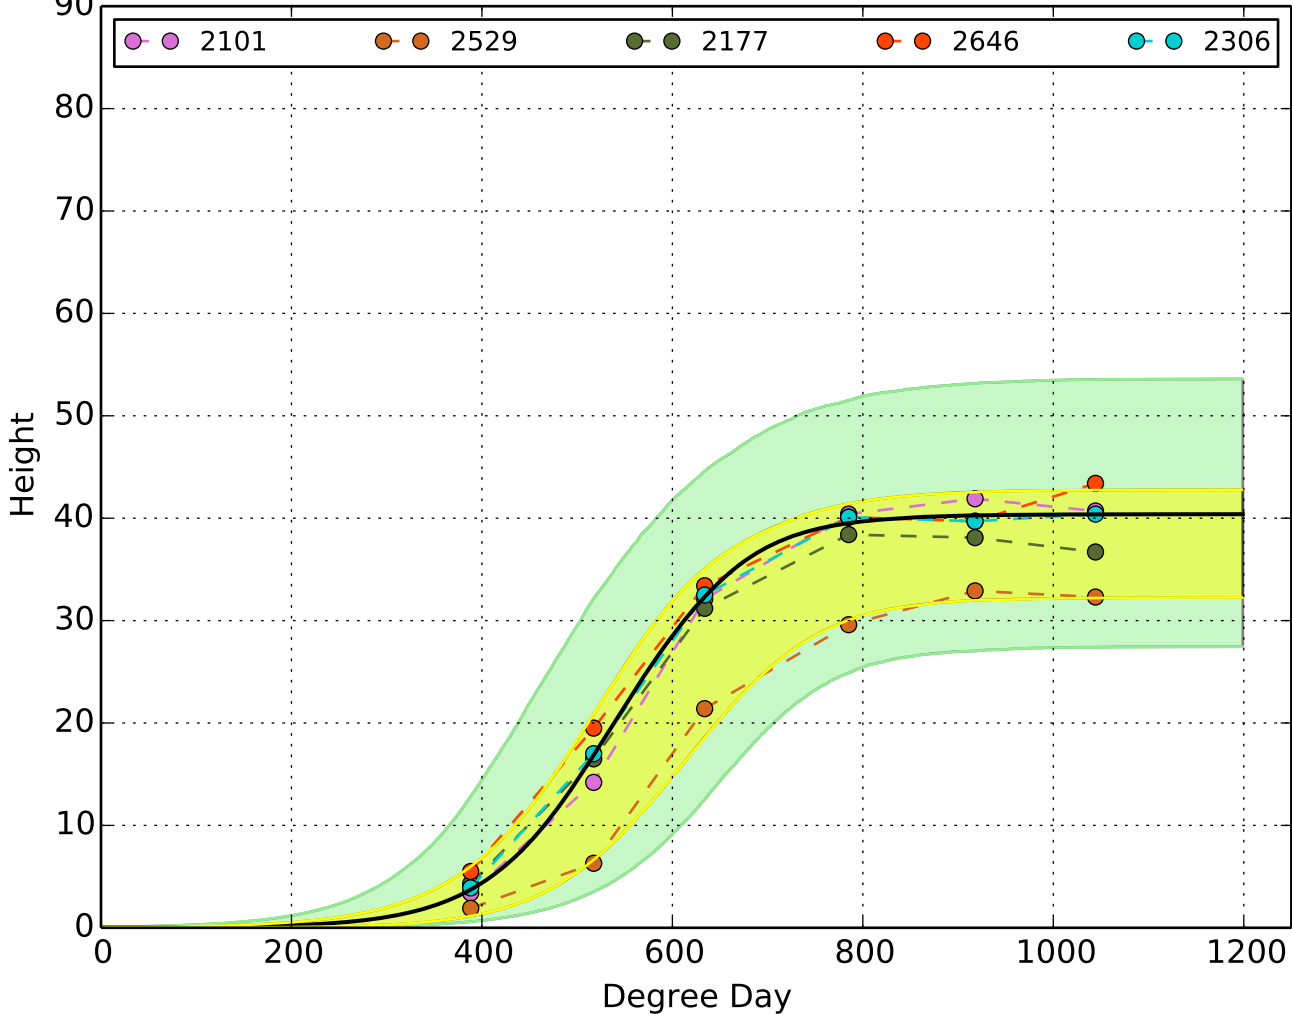



HeightModel3\_v1\_ResErrModel,Treat= UN\_2011,Line 136 (#Inv=6);95CI GrowthCurves

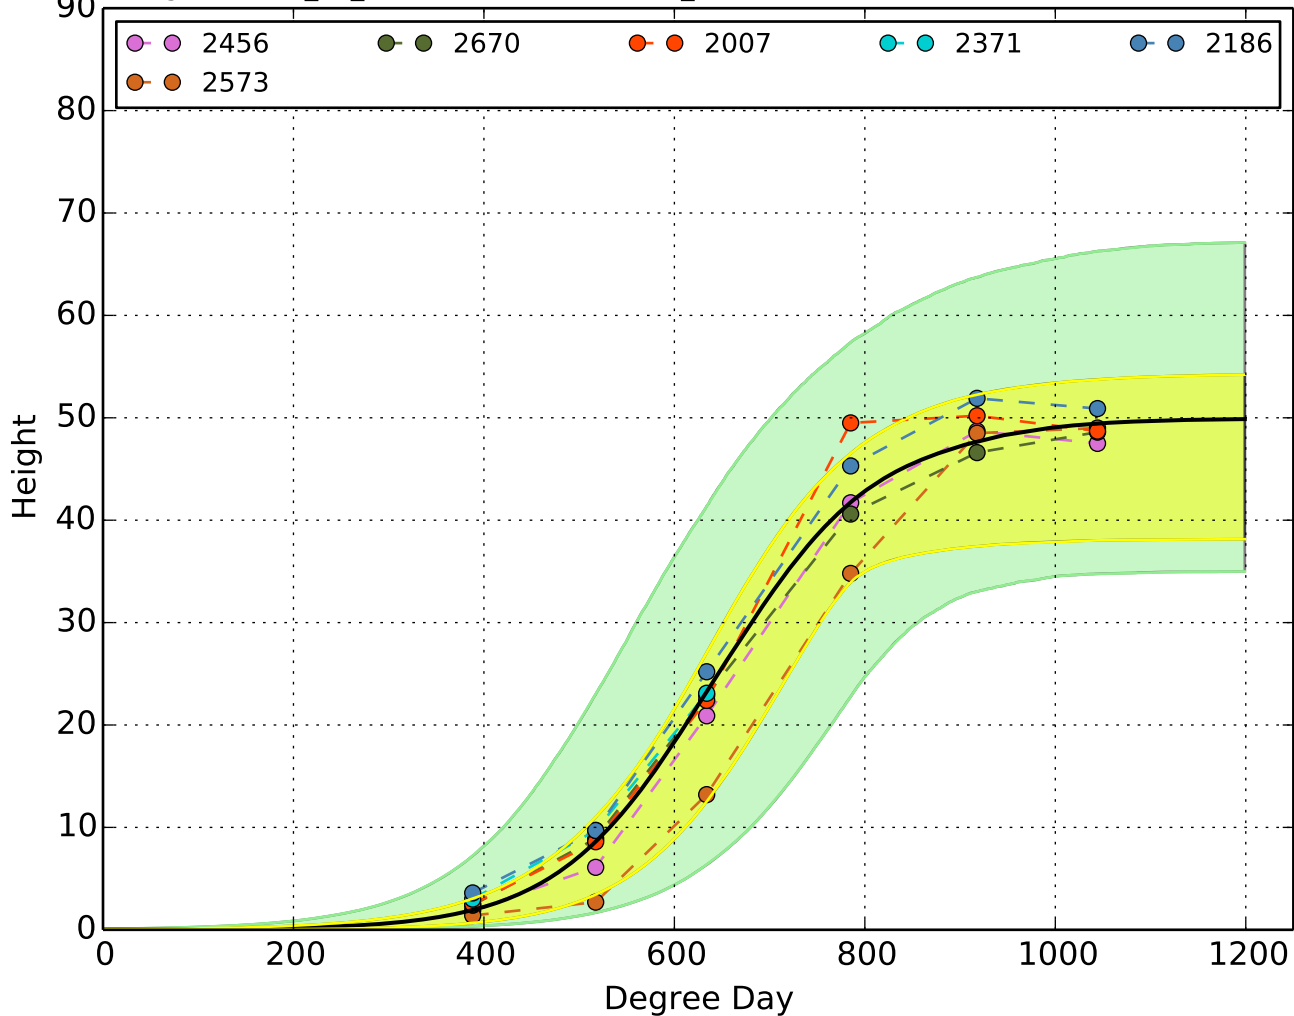

HeightModel3\_v1\_ResErrModel,Treat= UN\_2011,Line 143 (#Inv=6);95CI GrowthCurves

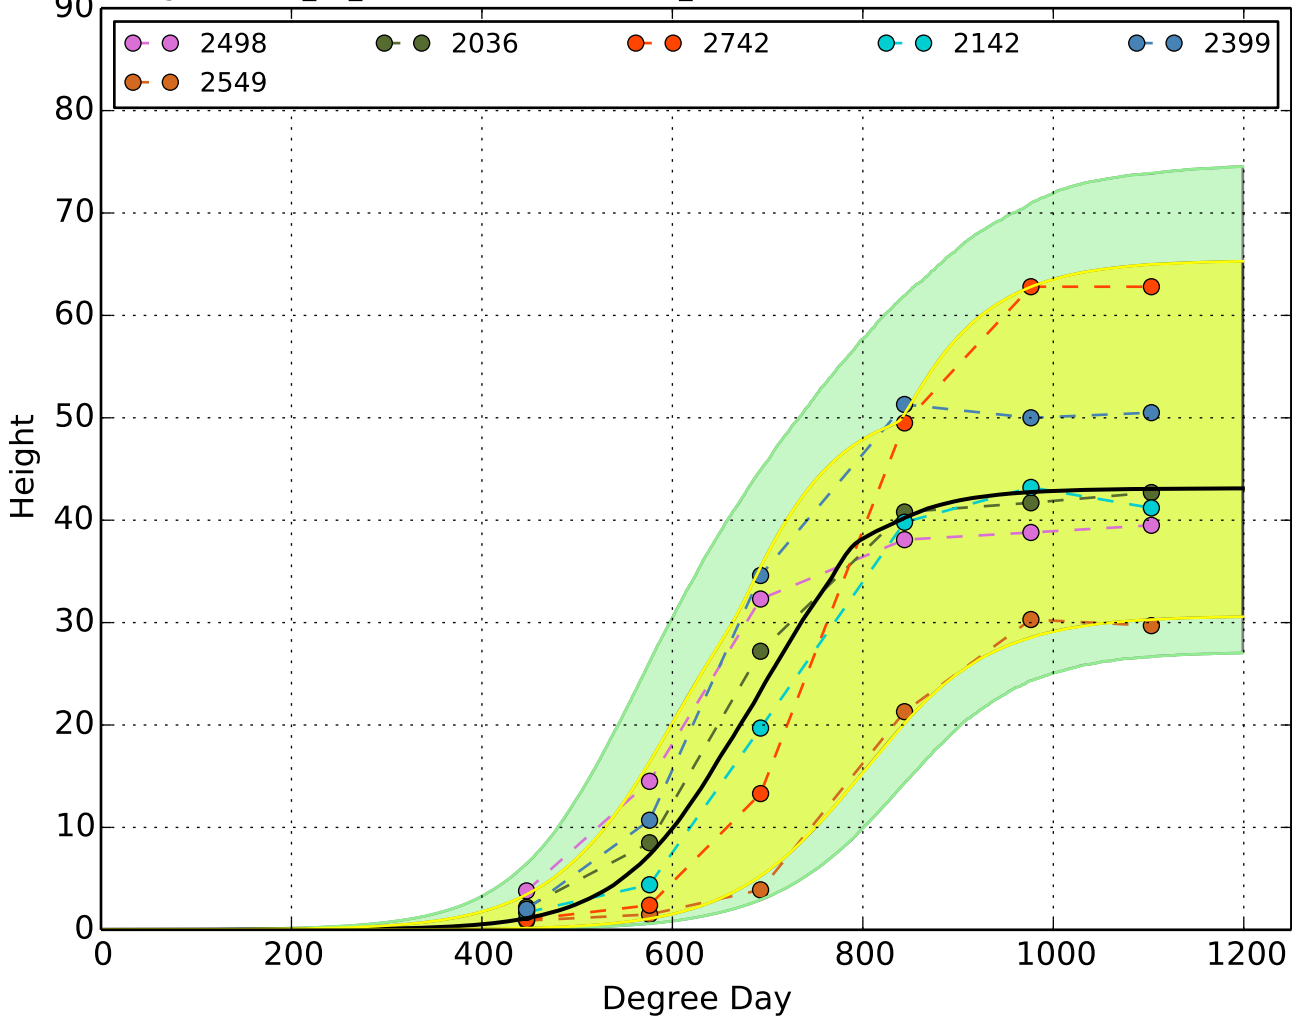

HeightModel3\_v1\_ResErrModel,Treat= UN\_2011,Line 146 (#Inv=6);95CI GrowthCurves

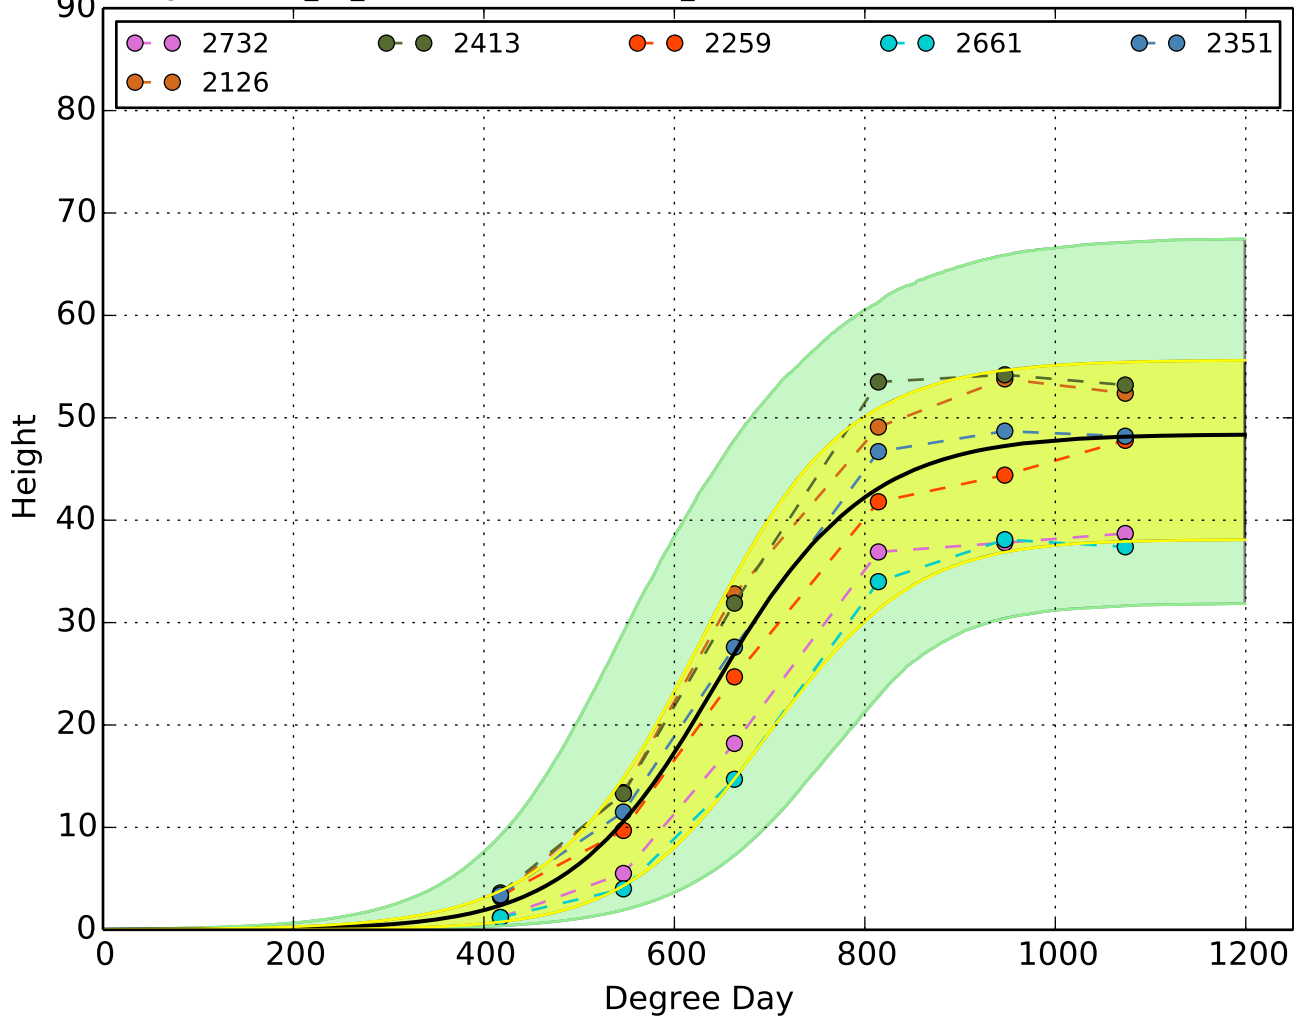

HeightModel3\_v1\_ResErrModel,Treat= UN\_2011,Line 147 (#Inv=6);95CI GrowthCurves

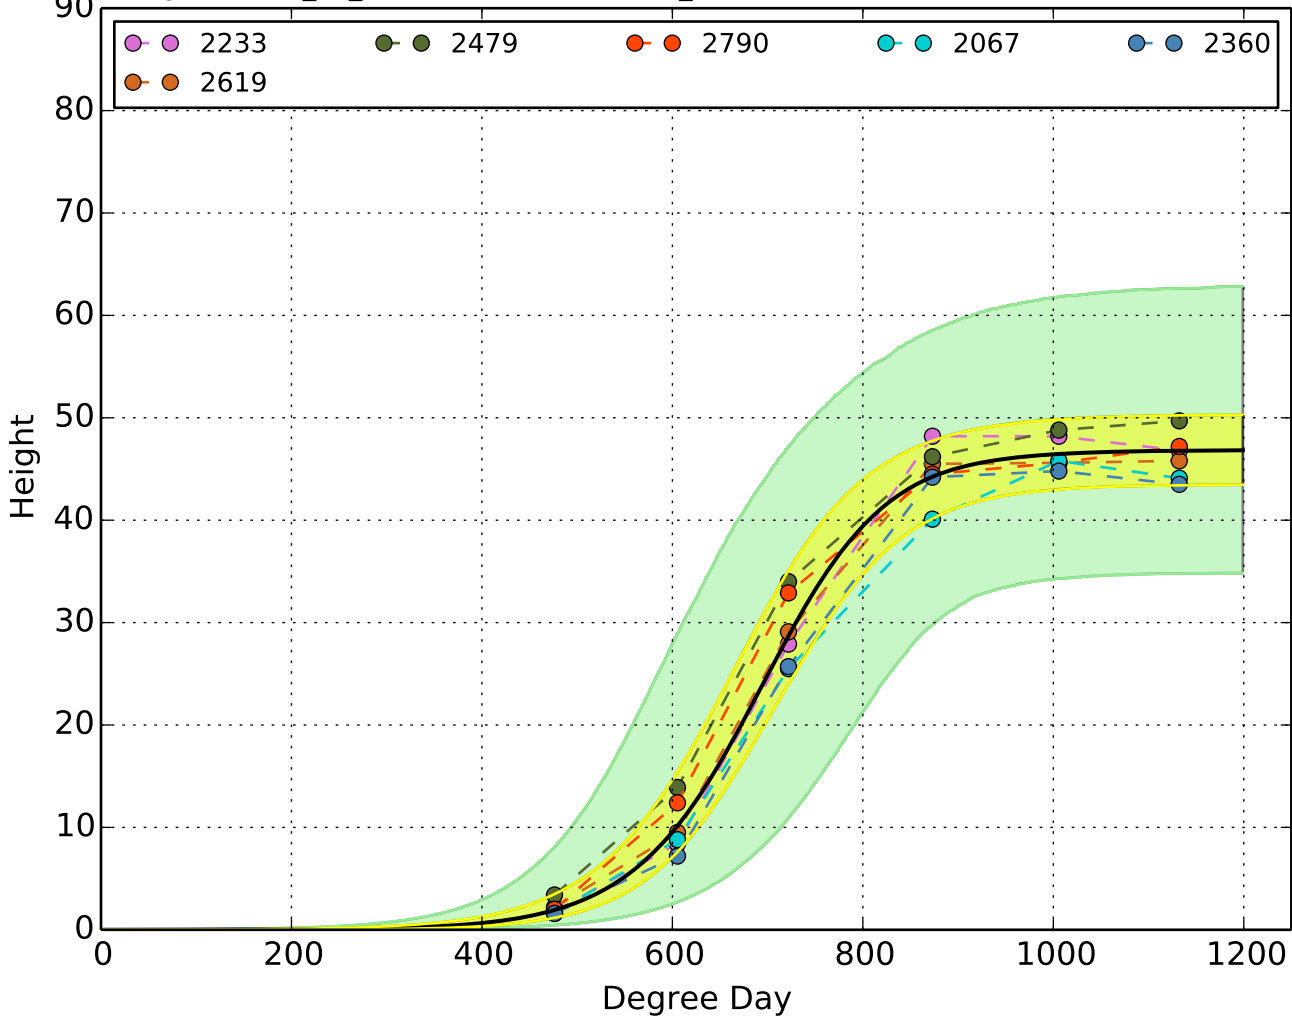

HeightModel3\_v1\_ResErrModel,Treat= UN\_2011,Line 150 (#Inv=6);95CI GrowthCurves

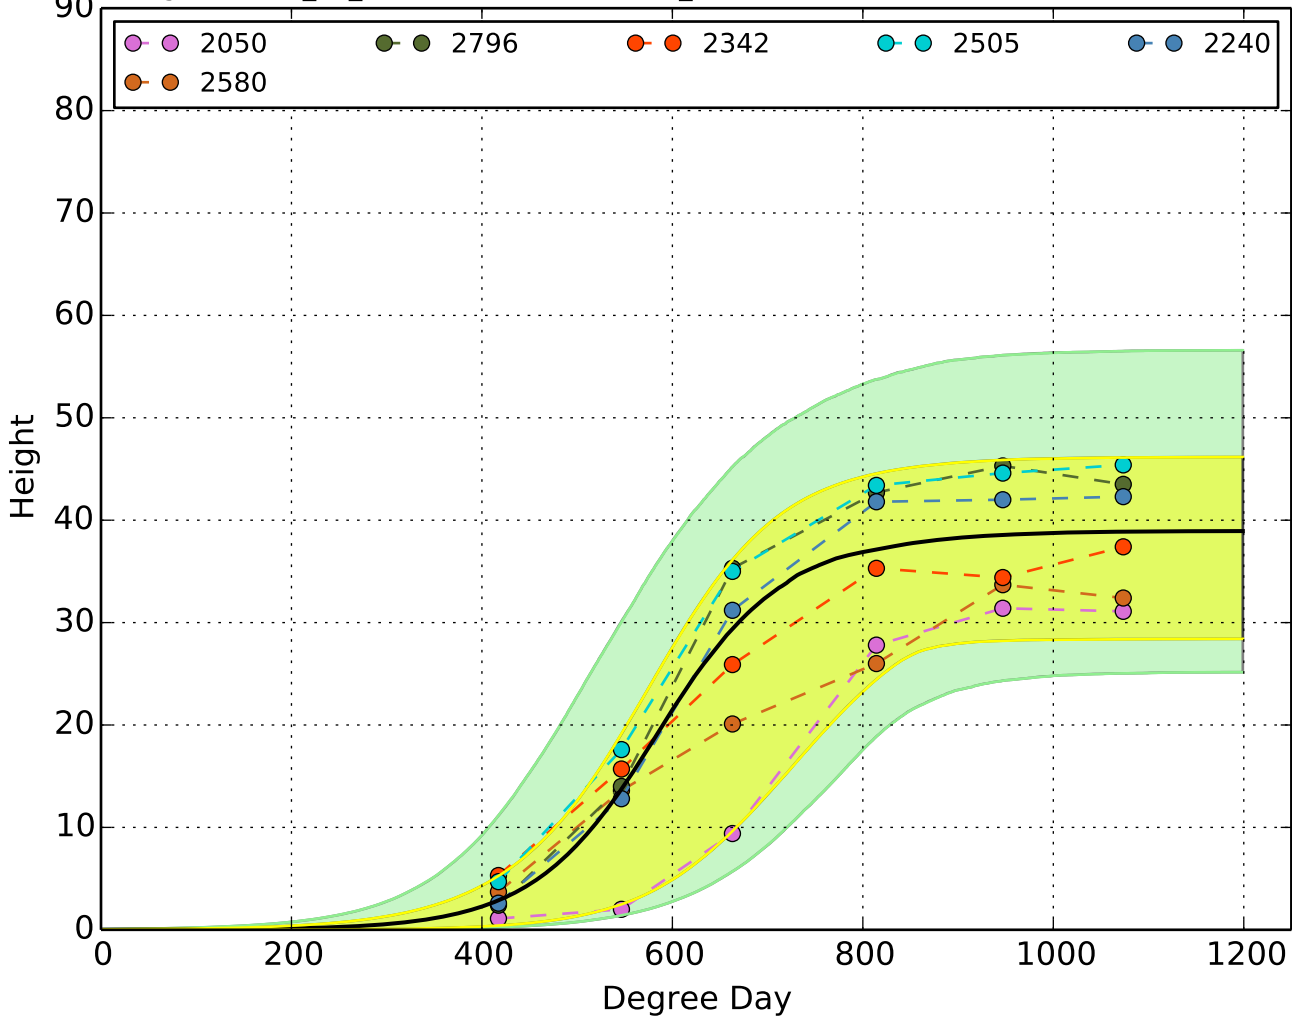

HeightModel3\_v1\_ResErrModel,Treat= UN\_2011,Line 154 (#Inv=6);95CI GrowthCurves

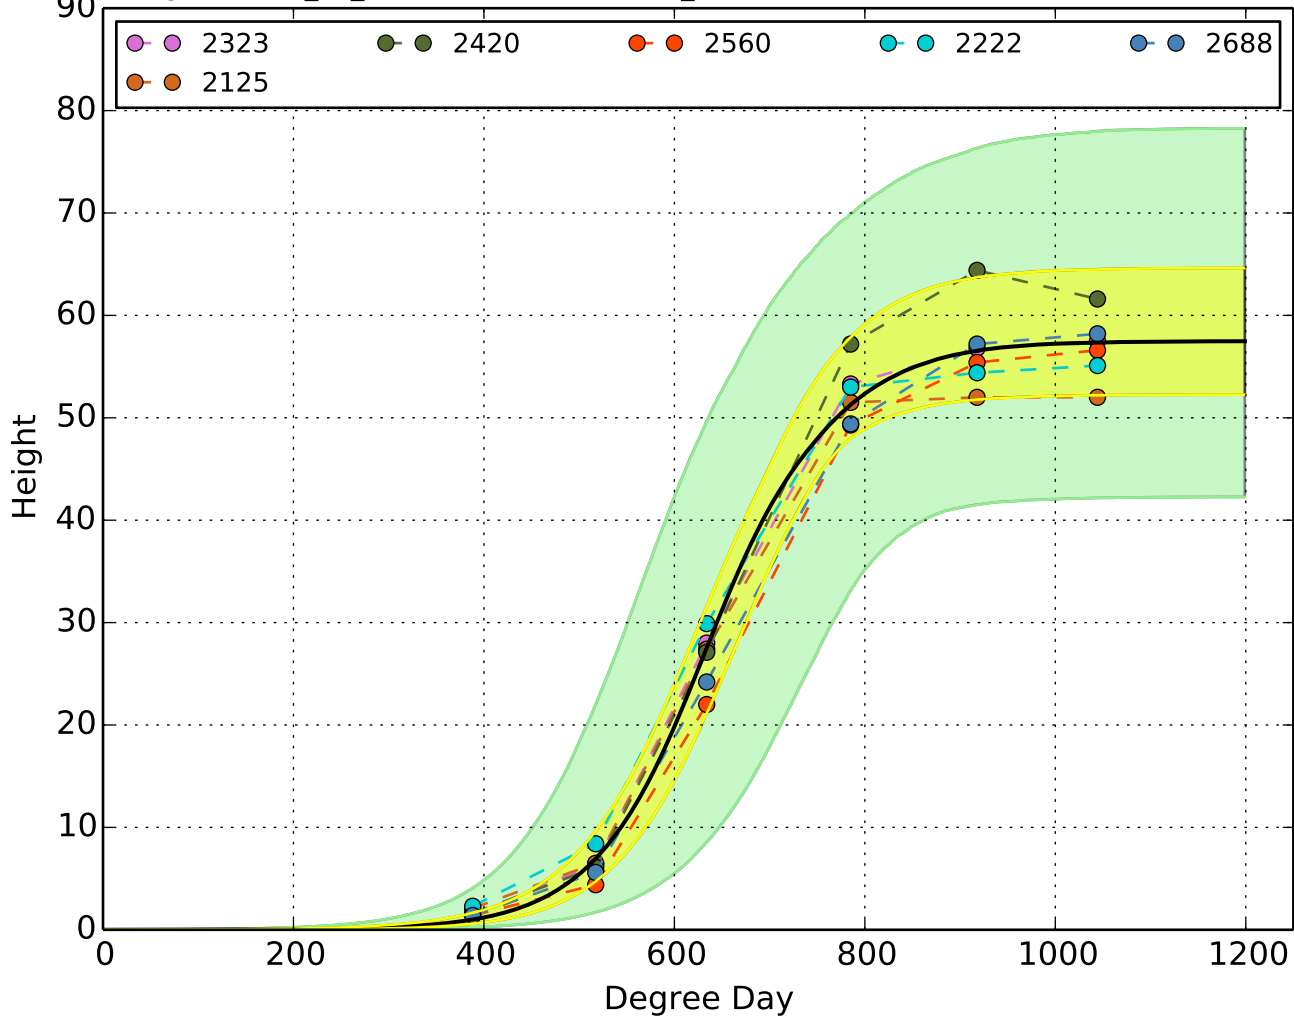

HeightModel3\_v1\_ResErrModel,Treat= UN\_2011,Line 155 (#Inv=6);95CI GrowthCurves

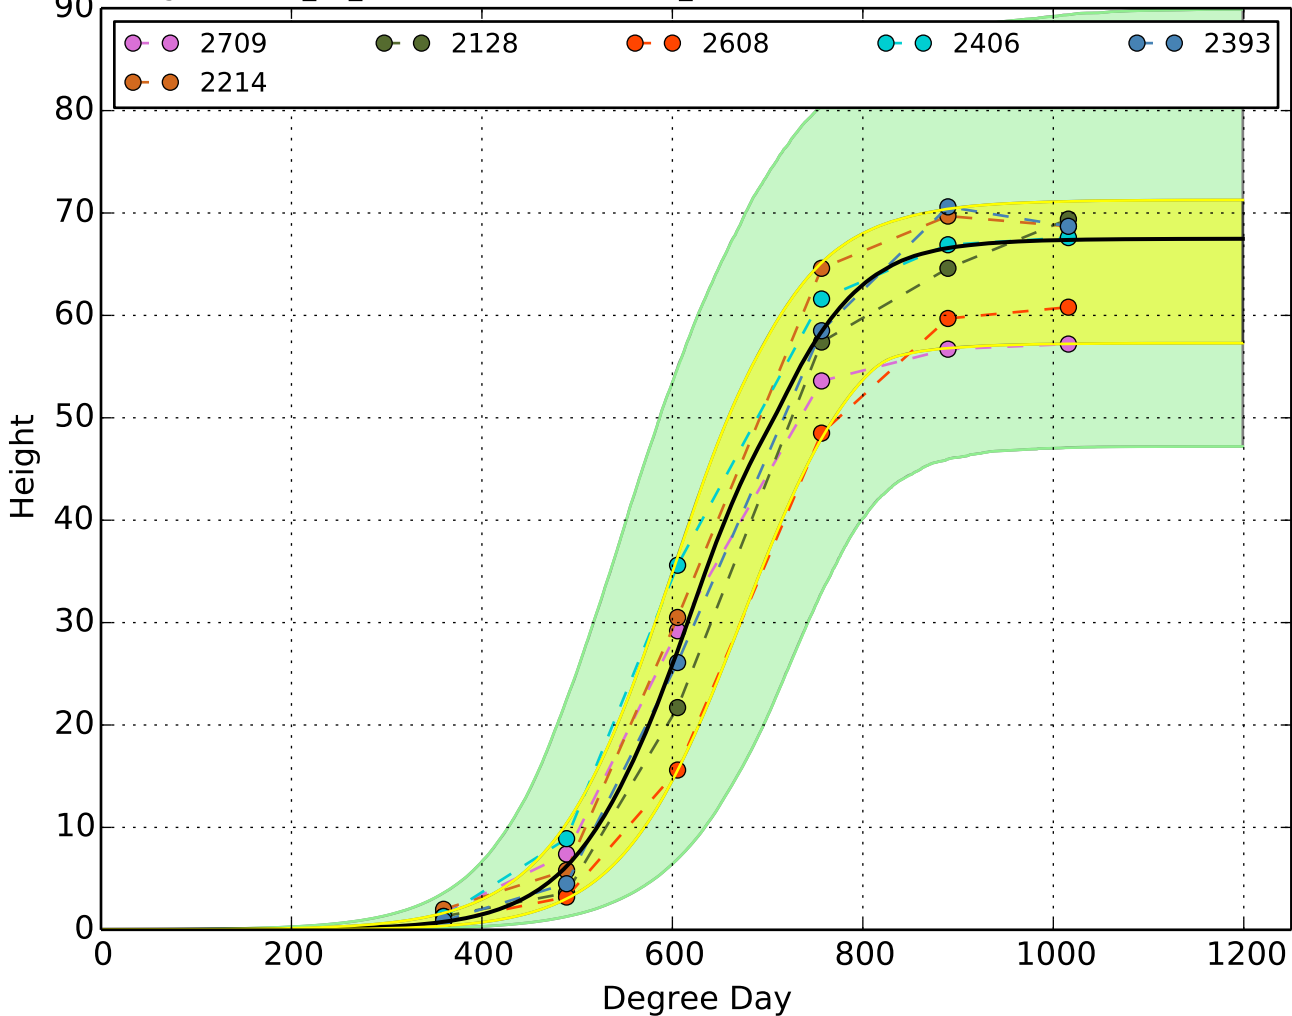

HeightModel3\_v1\_ResErrModel,Treat= UN\_2011,Line 164 (#Inv=5);95CI GrowthCurves

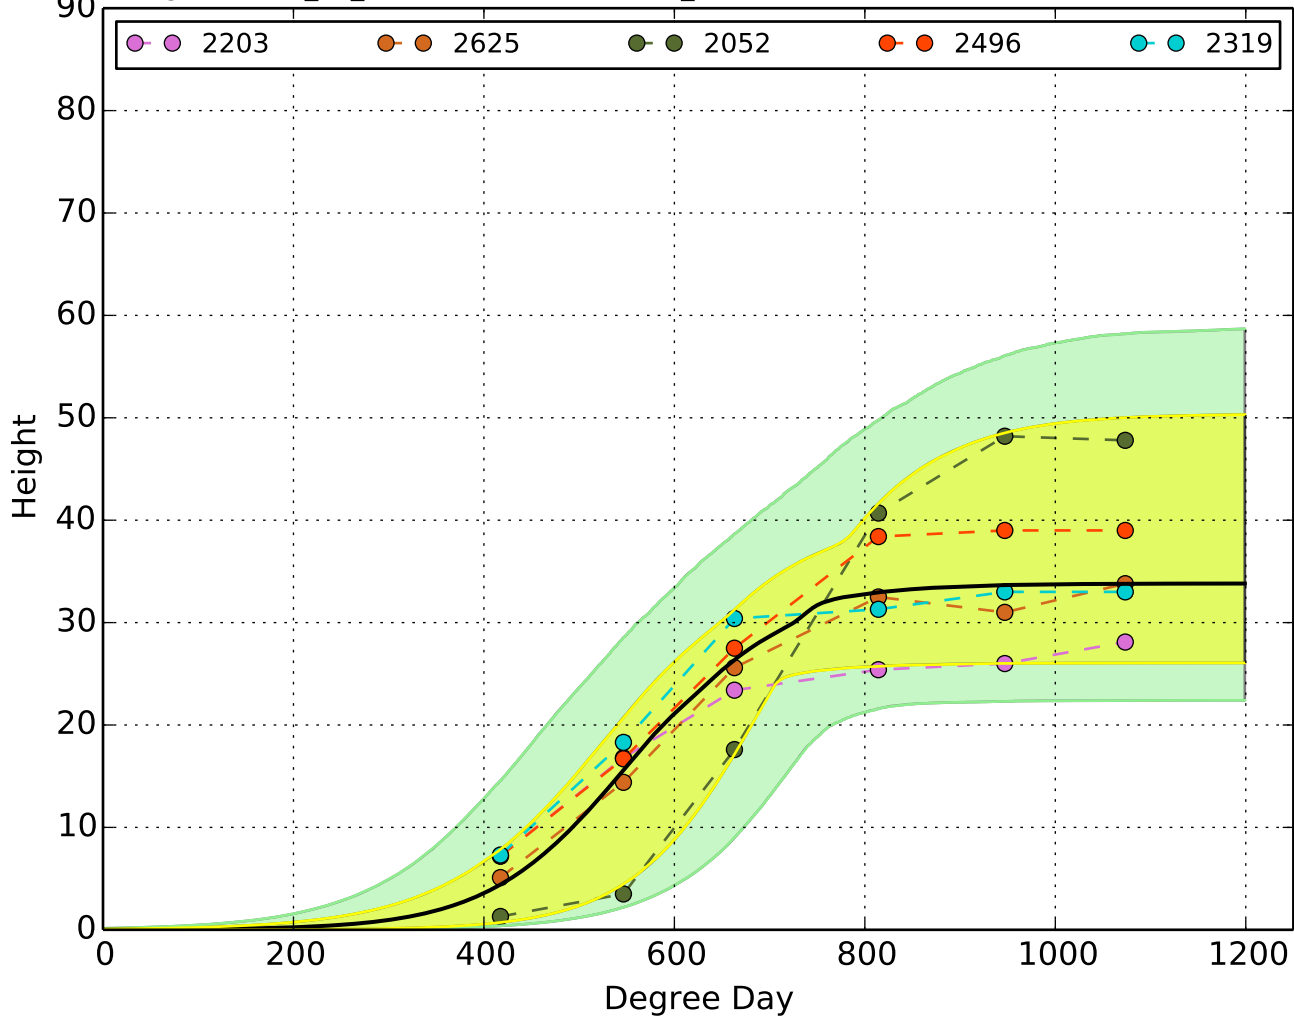



HeightModel3\_v1\_ResErrModel,Treat= UN\_2011,Line 171 (#Inv=5);95CI GrowthCurves

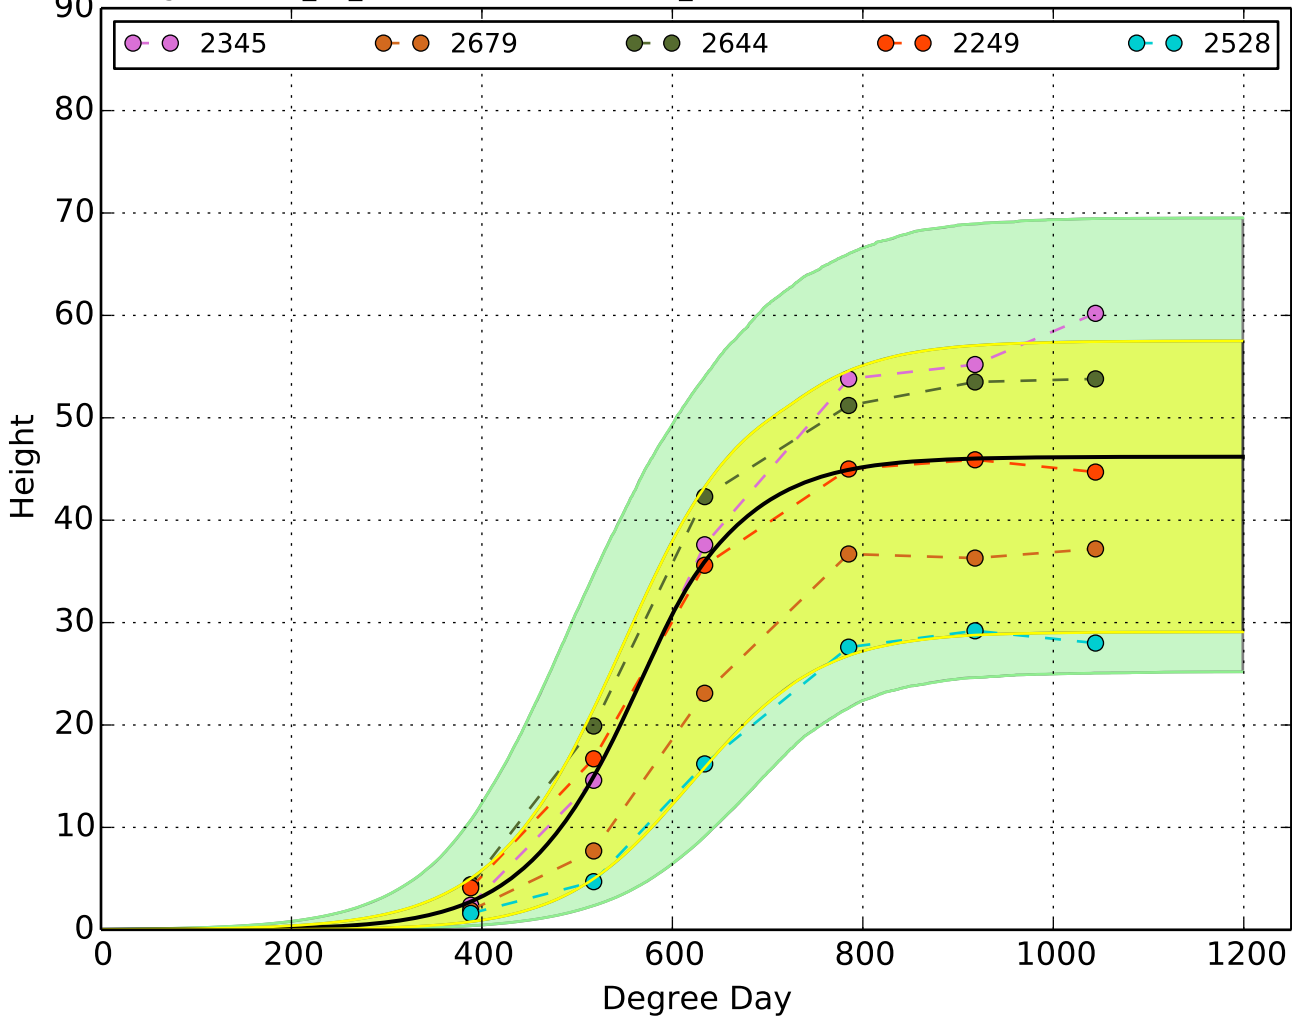

HeightModel3\_v1\_ResErrModel,Treat= UN\_2011,Line 174 (#Inv=6);95CI GrowthCurves

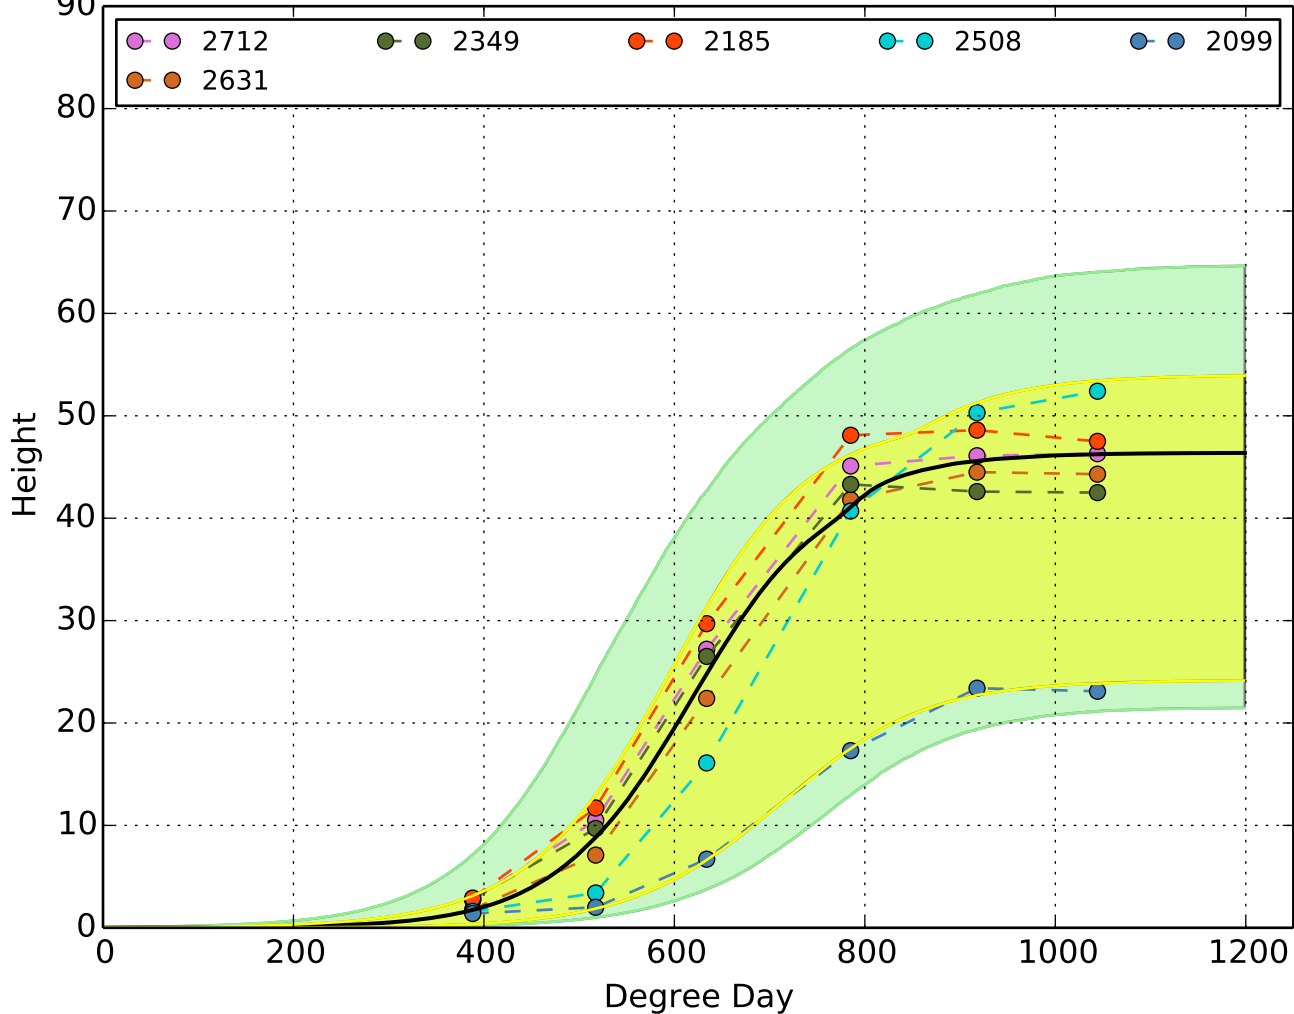

HeightModel3\_v1\_ResErrModel,Treat= UN\_2011,Line 175 (#Inv=4);95CI GrowthCurves

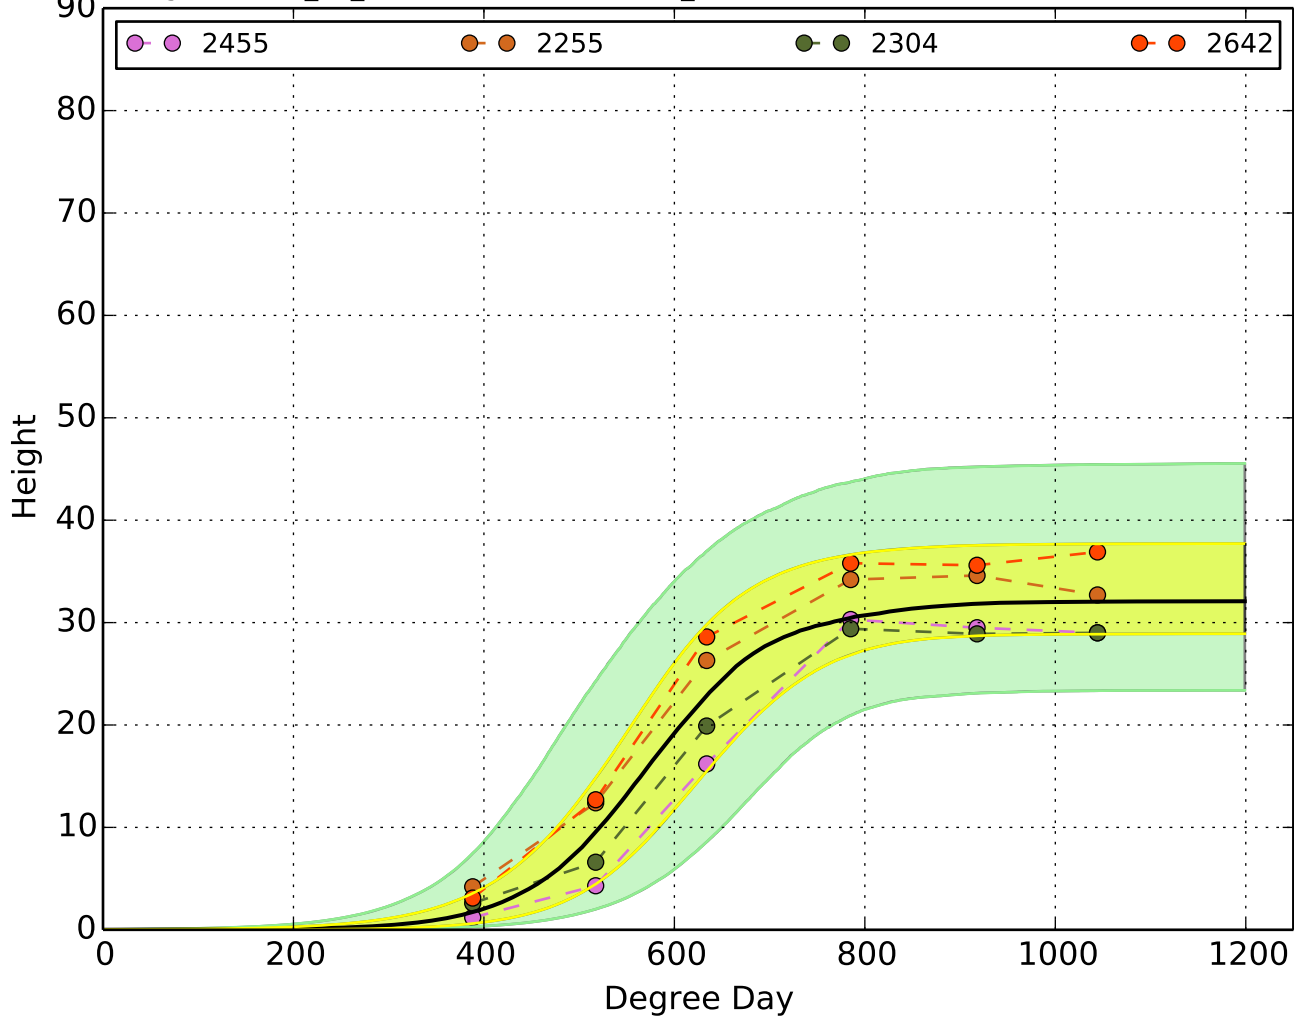

HeightModel3\_v1\_ResErrModel,Treat= UN\_2011,Line 176 (#Inv=6);95CI GrowthCurves

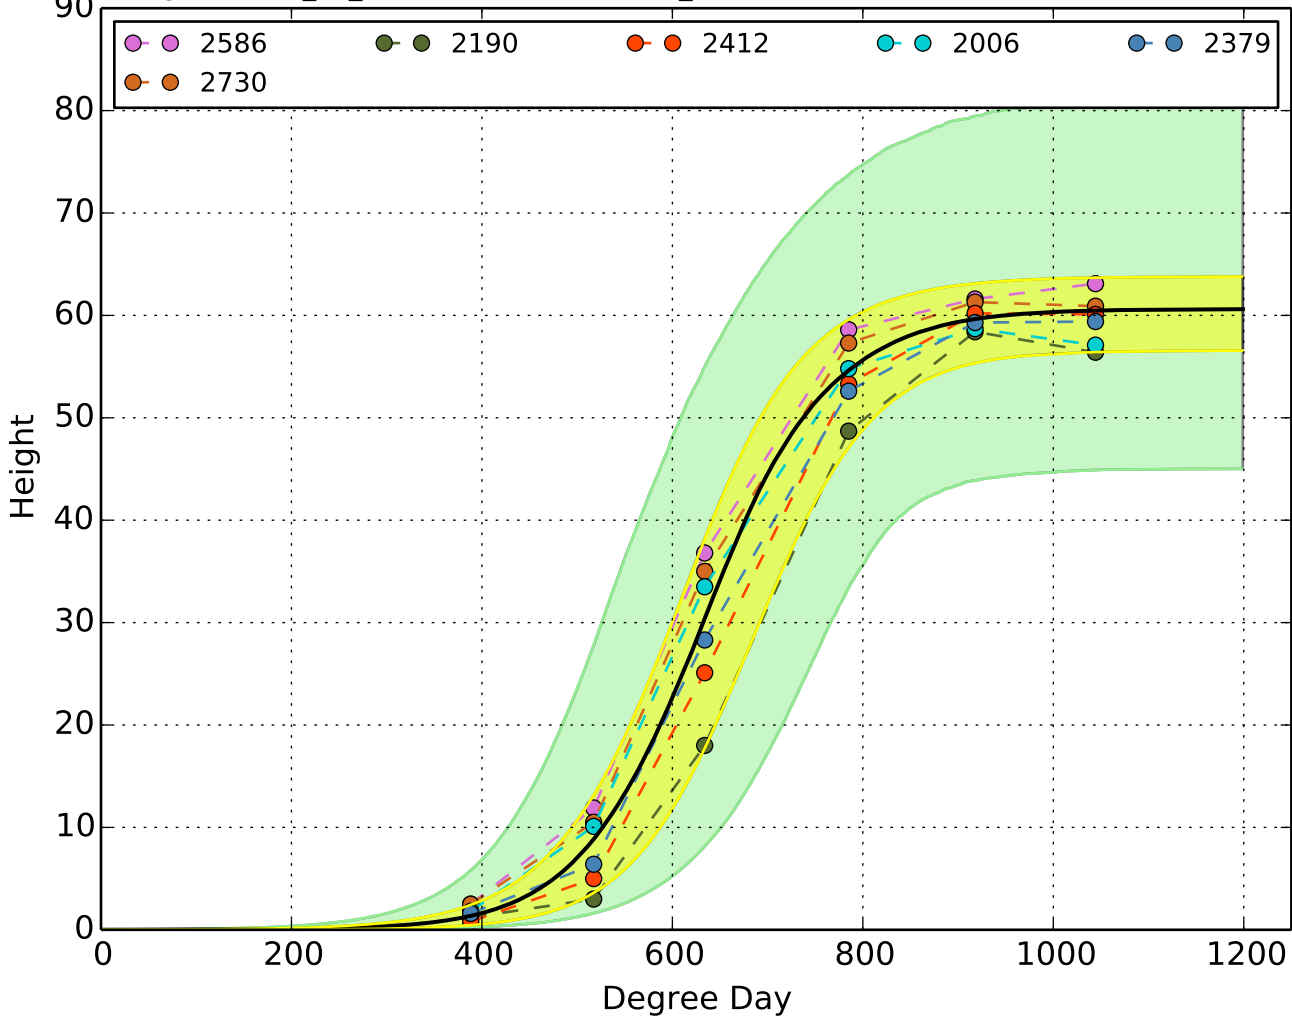

HeightModel3\_v1\_ResErrModel,Treat= UN\_2011,Line 182 (#Inv=5);95CI GrowthCurves

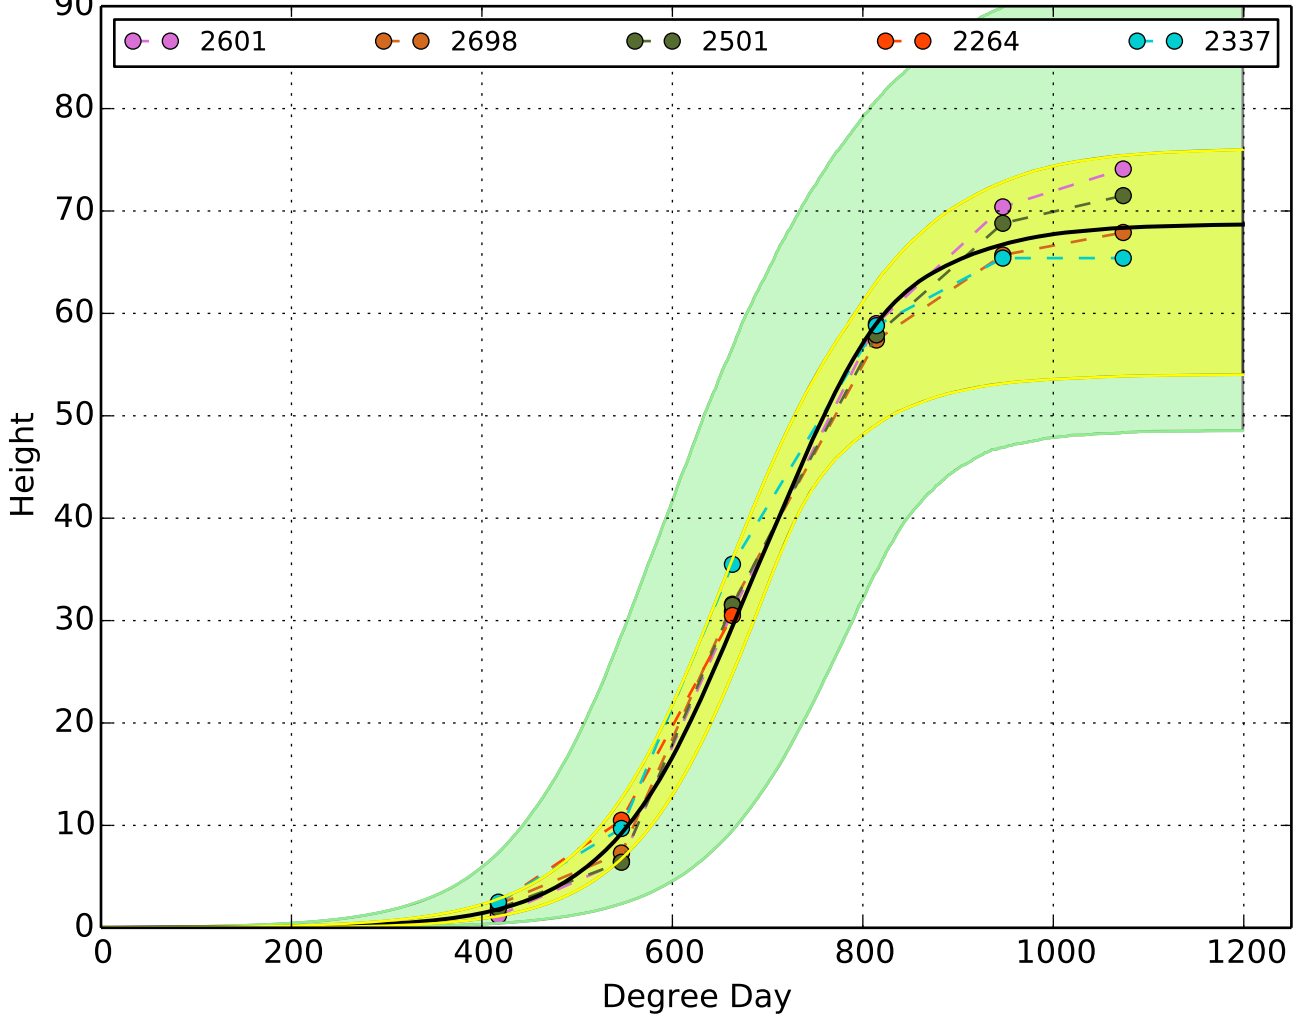

HeightModel3\_v1\_ResErrModel,Treat= UN\_2011,Line 183 (#Inv=5);95CI GrowthCurves

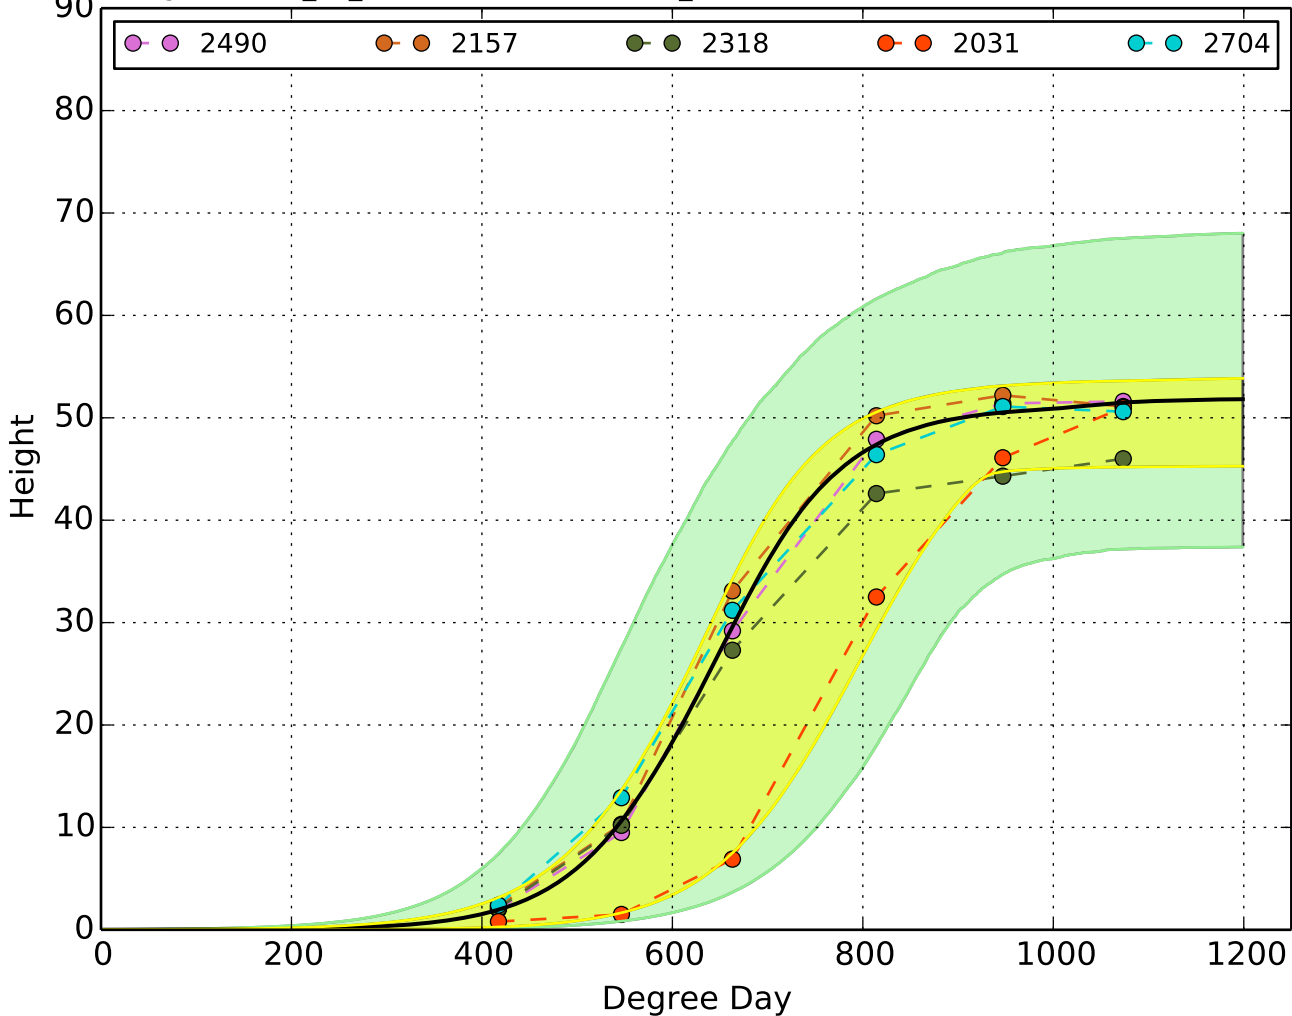

HeightModel3\_v1\_ResErrModel,Treat= UN\_2011,Line 184 (#Inv=6);95CI GrowthCurves

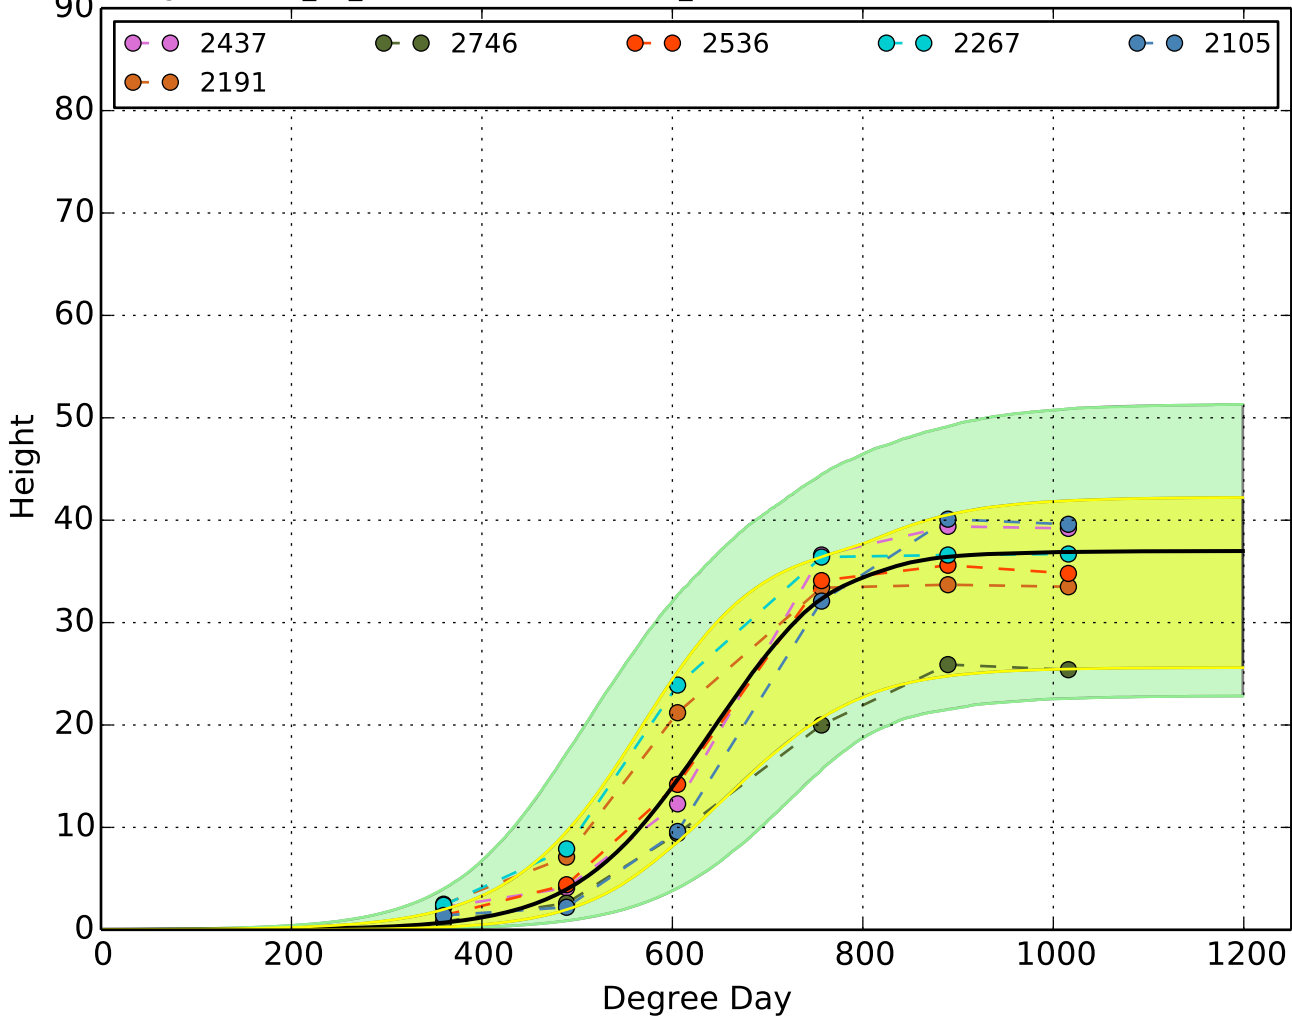

HeightModel3\_v1\_ResErrModel,Treat= UN\_2011,Line 187 (#Inv=6);95CI GrowthCurves

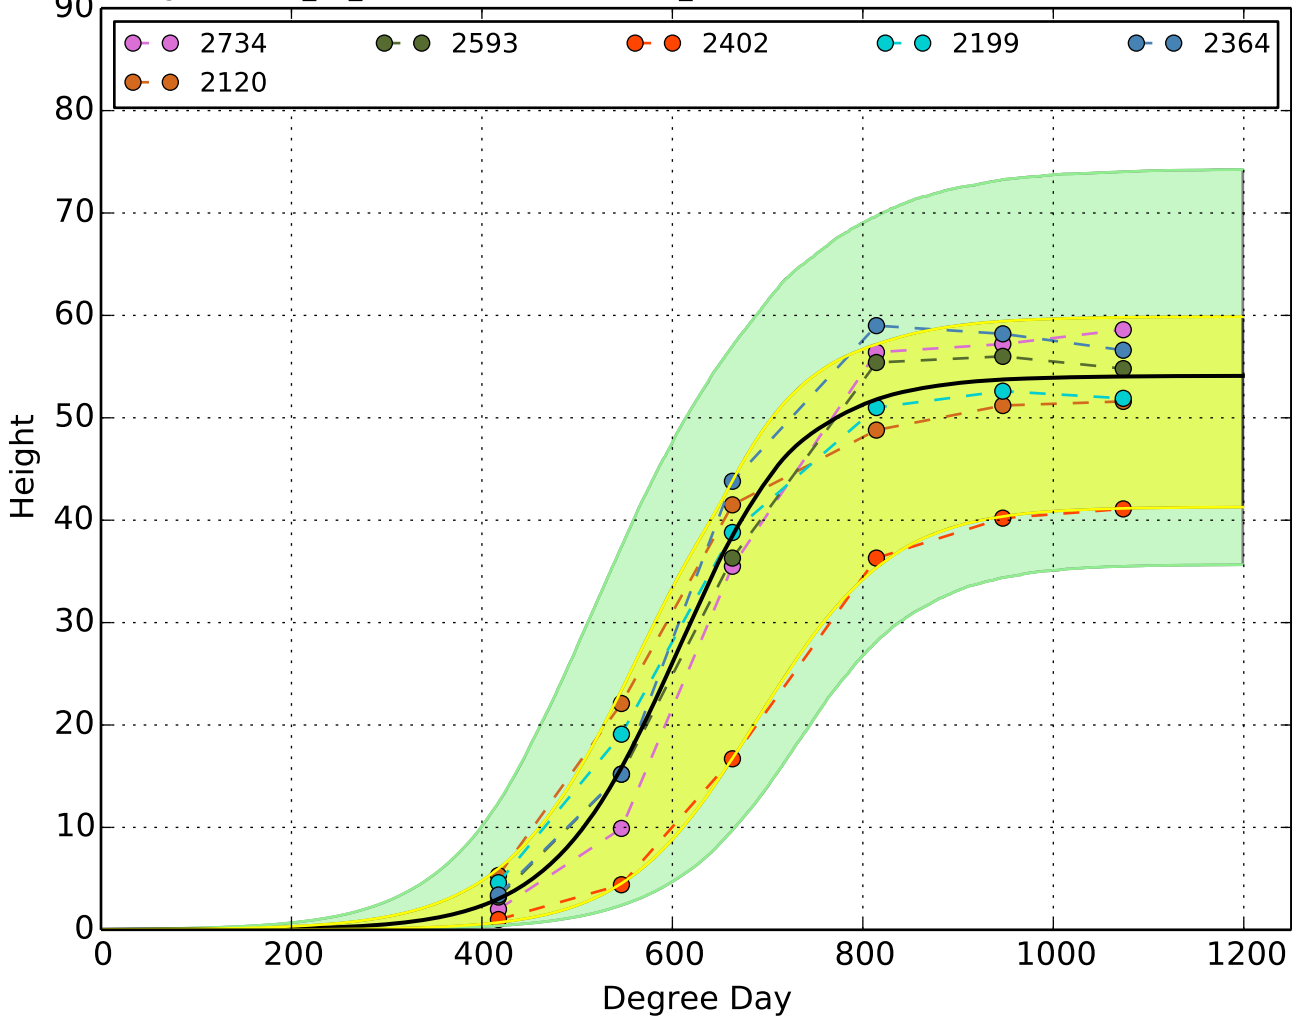



HeightModel3\_v1\_ResErrModel,Treat= UN\_2011,Line 190 (#Inv=6);95CI GrowthCurves

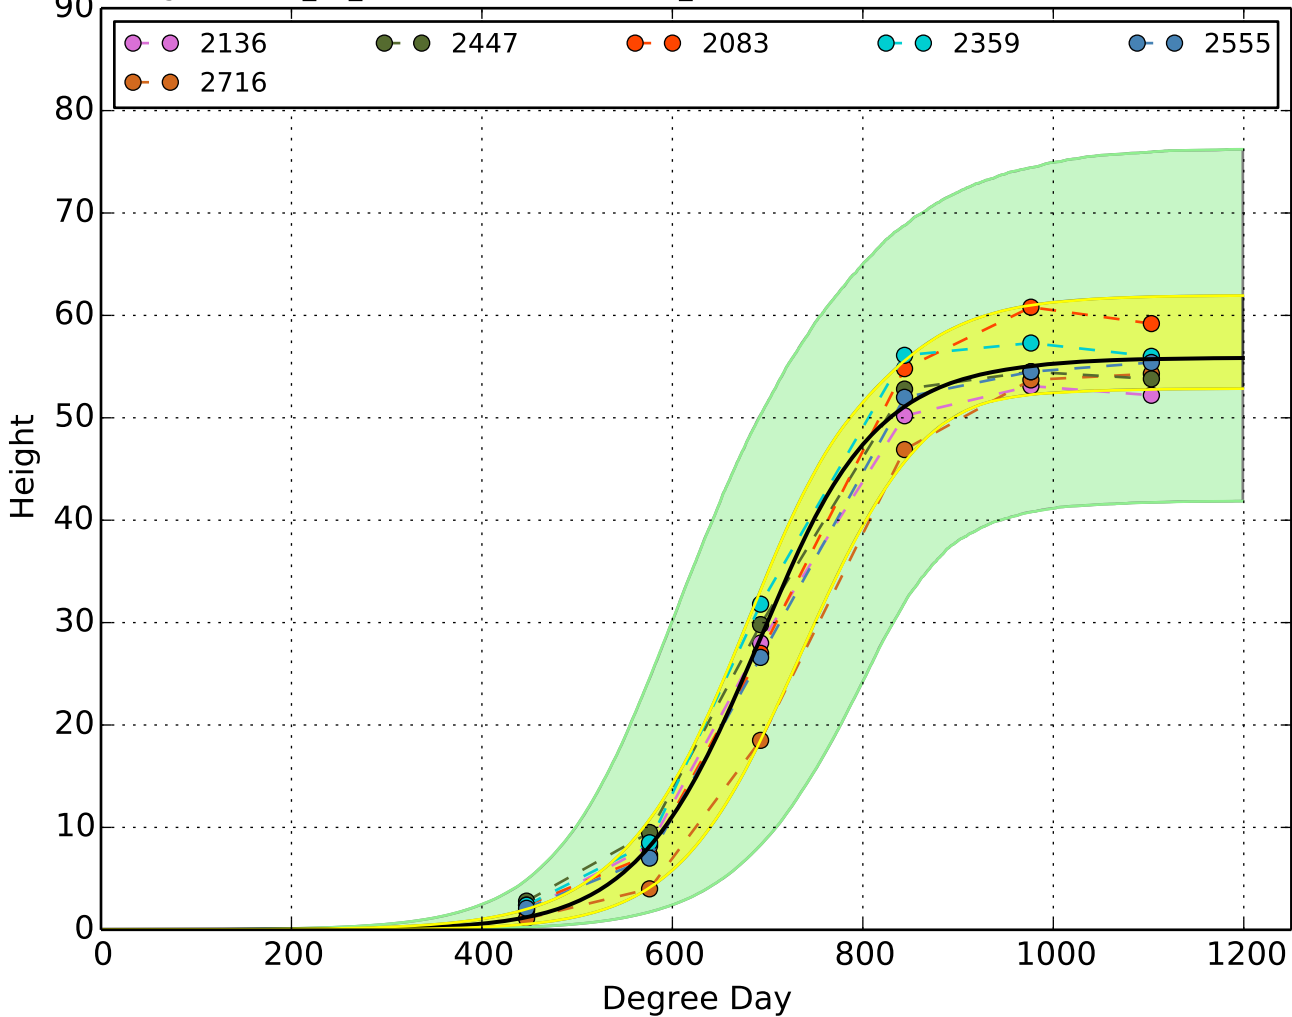

HeightModel3\_v1\_ResErrModel,Treat= UN\_2011,Line 193 (#Inv=6);95CI GrowthCurves

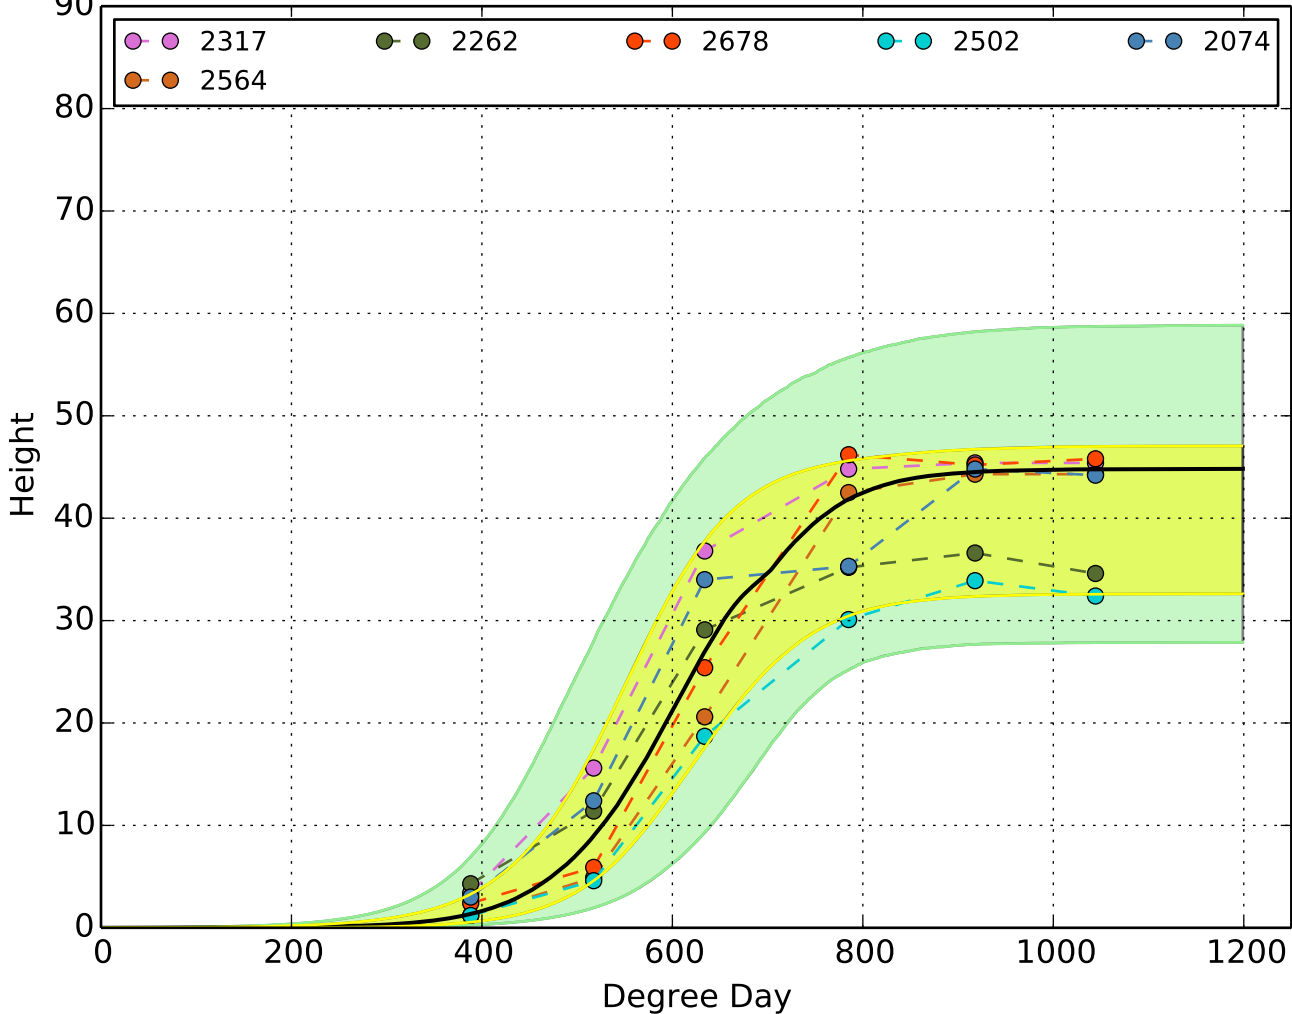

HeightModel3\_v1\_ResErrModel,Treat= UN\_2011,Line 198 (#Inv=6);95CI GrowthCurves

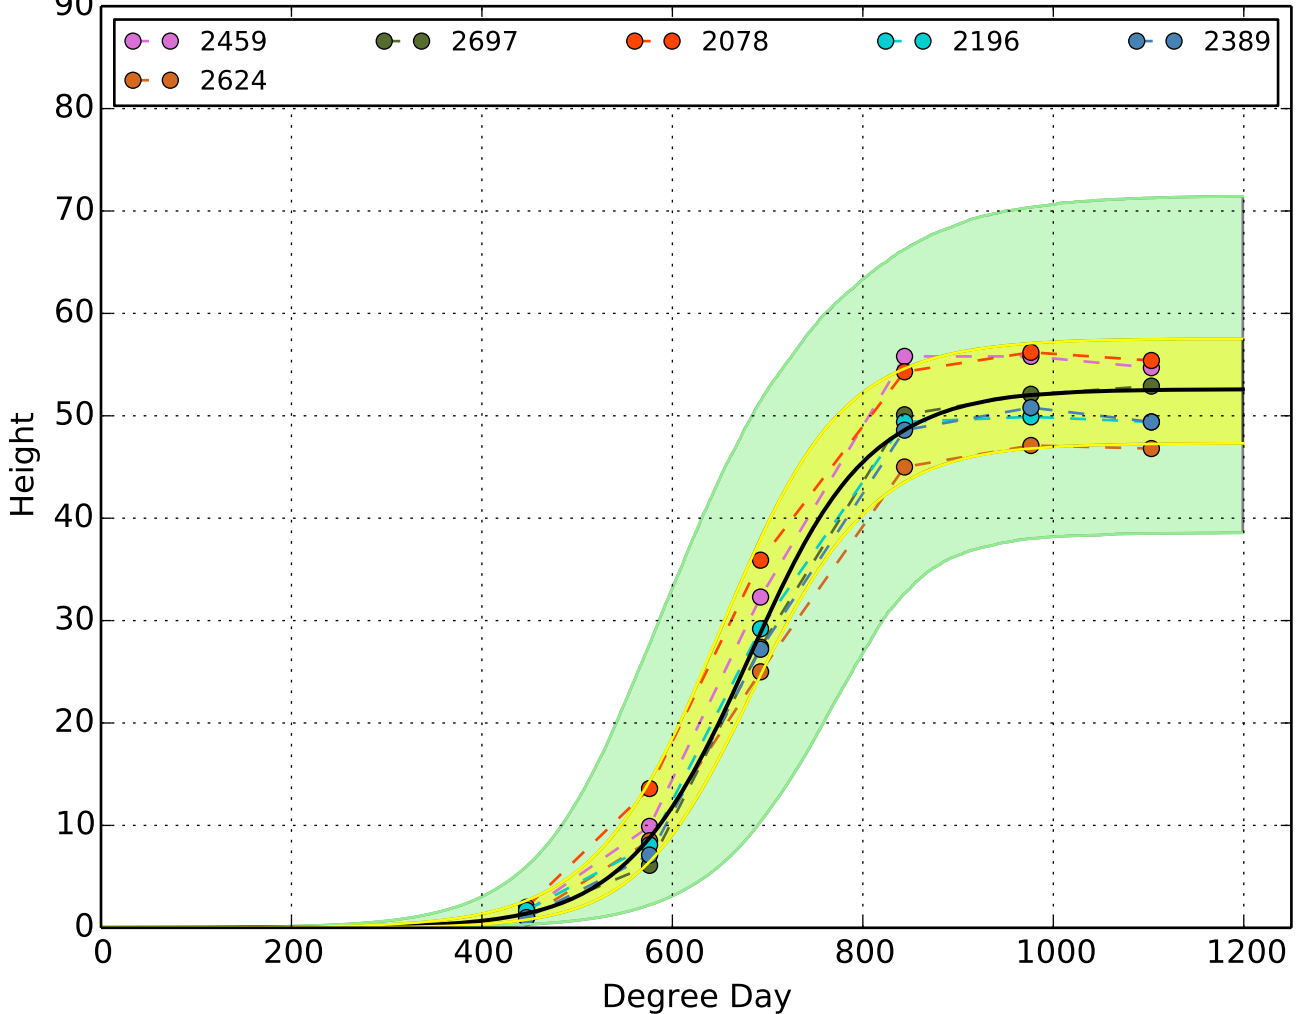

HeightModel3\_v1\_ResErrModel,Treat= UN\_2011,Line 199 (#Inv=6);95CI GrowthCurves

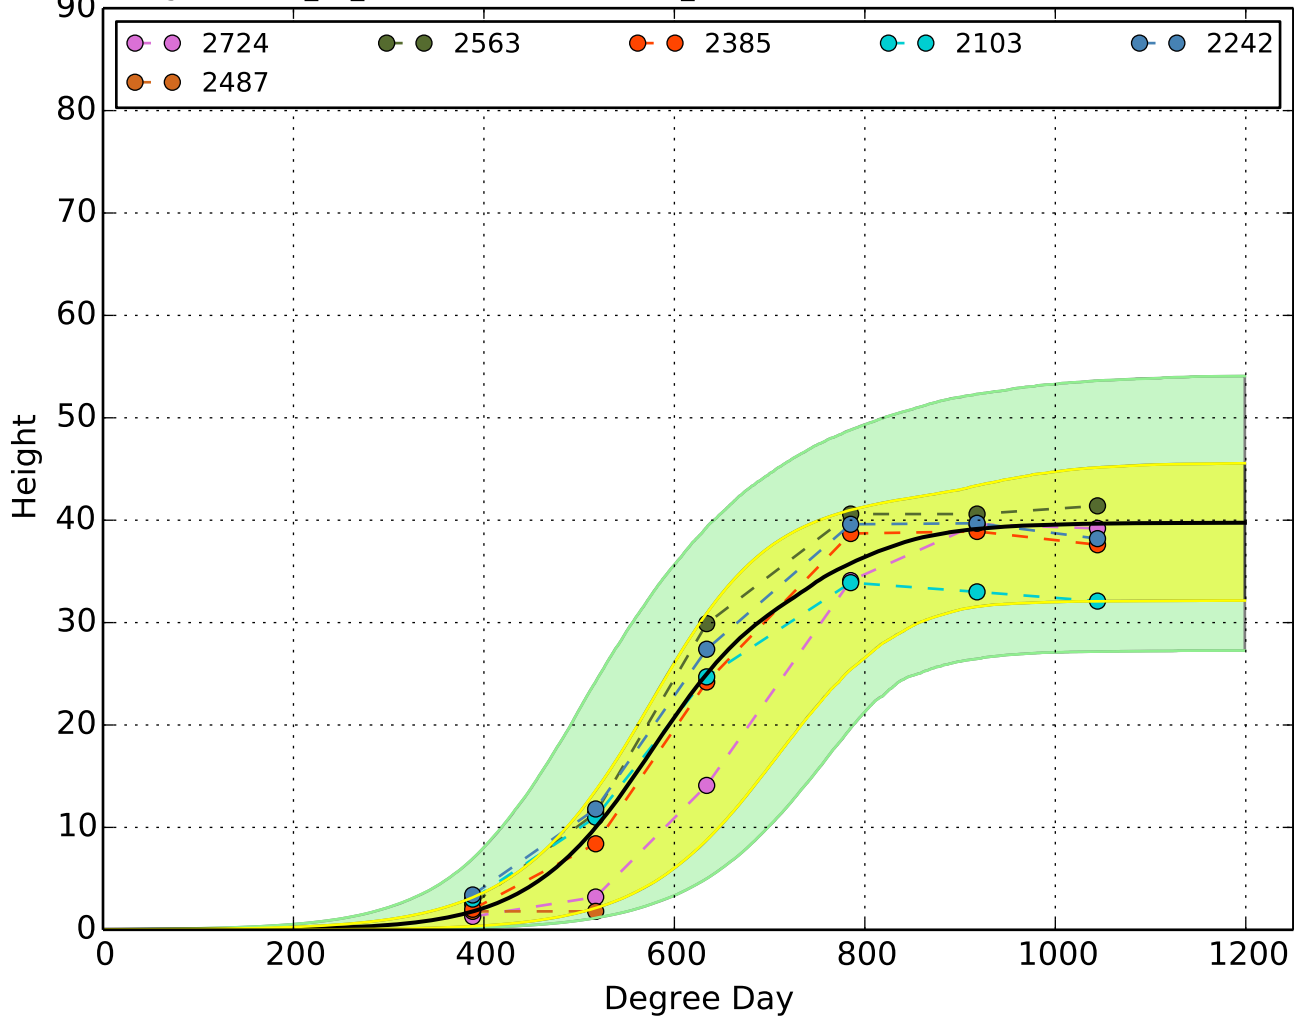

HeightModel3\_v1\_ResErrModel,Treat= UN\_2011,Line 201 (#Inv=6);95CI GrowthCurves

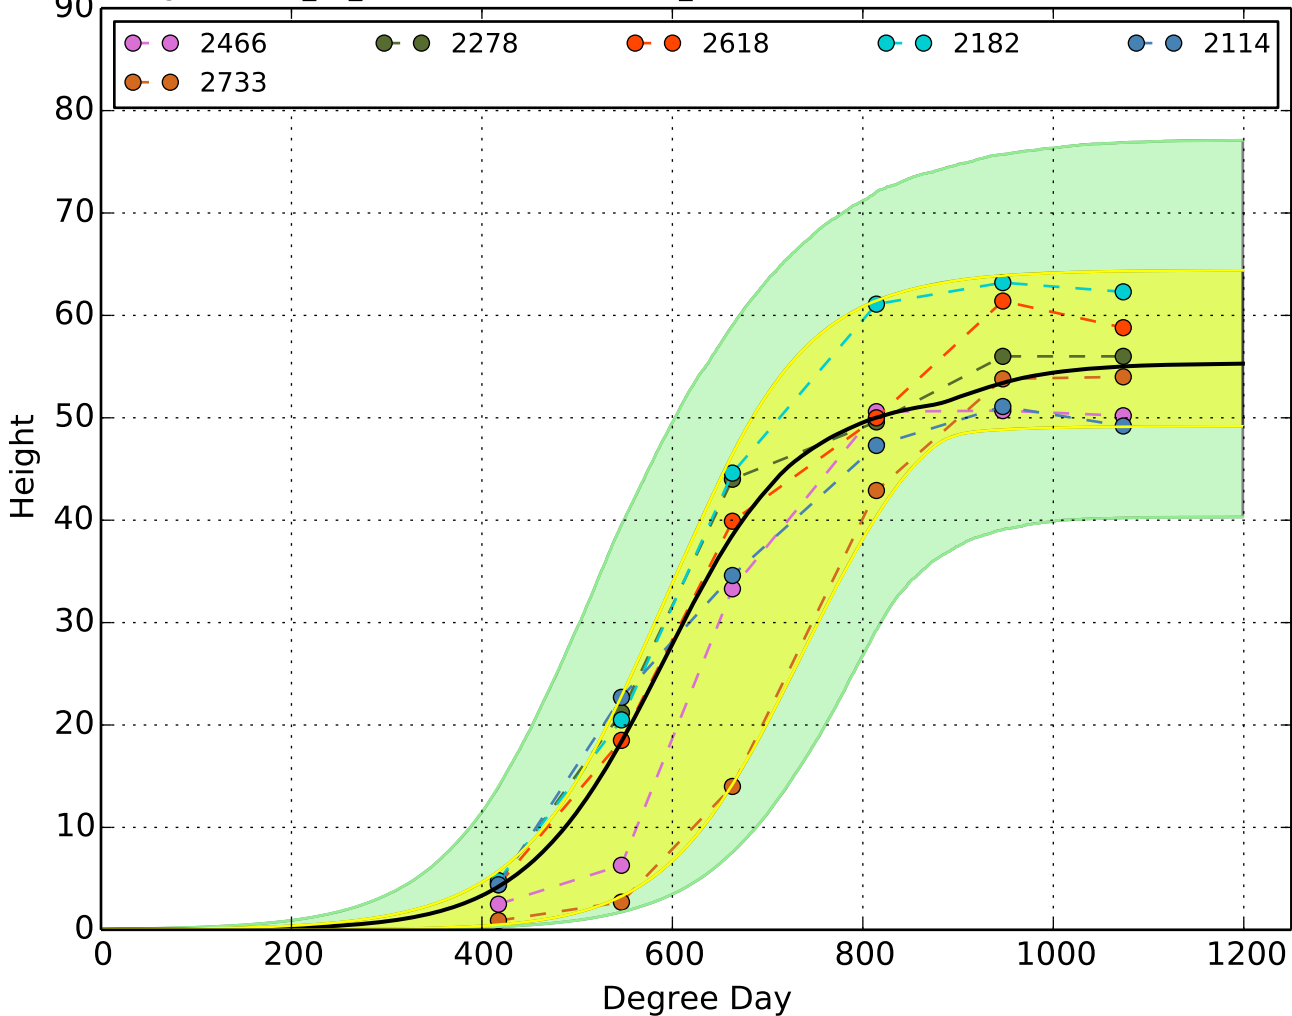

HeightModel3\_v1\_ResErrModel,Treat= UN\_2011,Line 204 (#Inv=6);95CI GrowthCurves

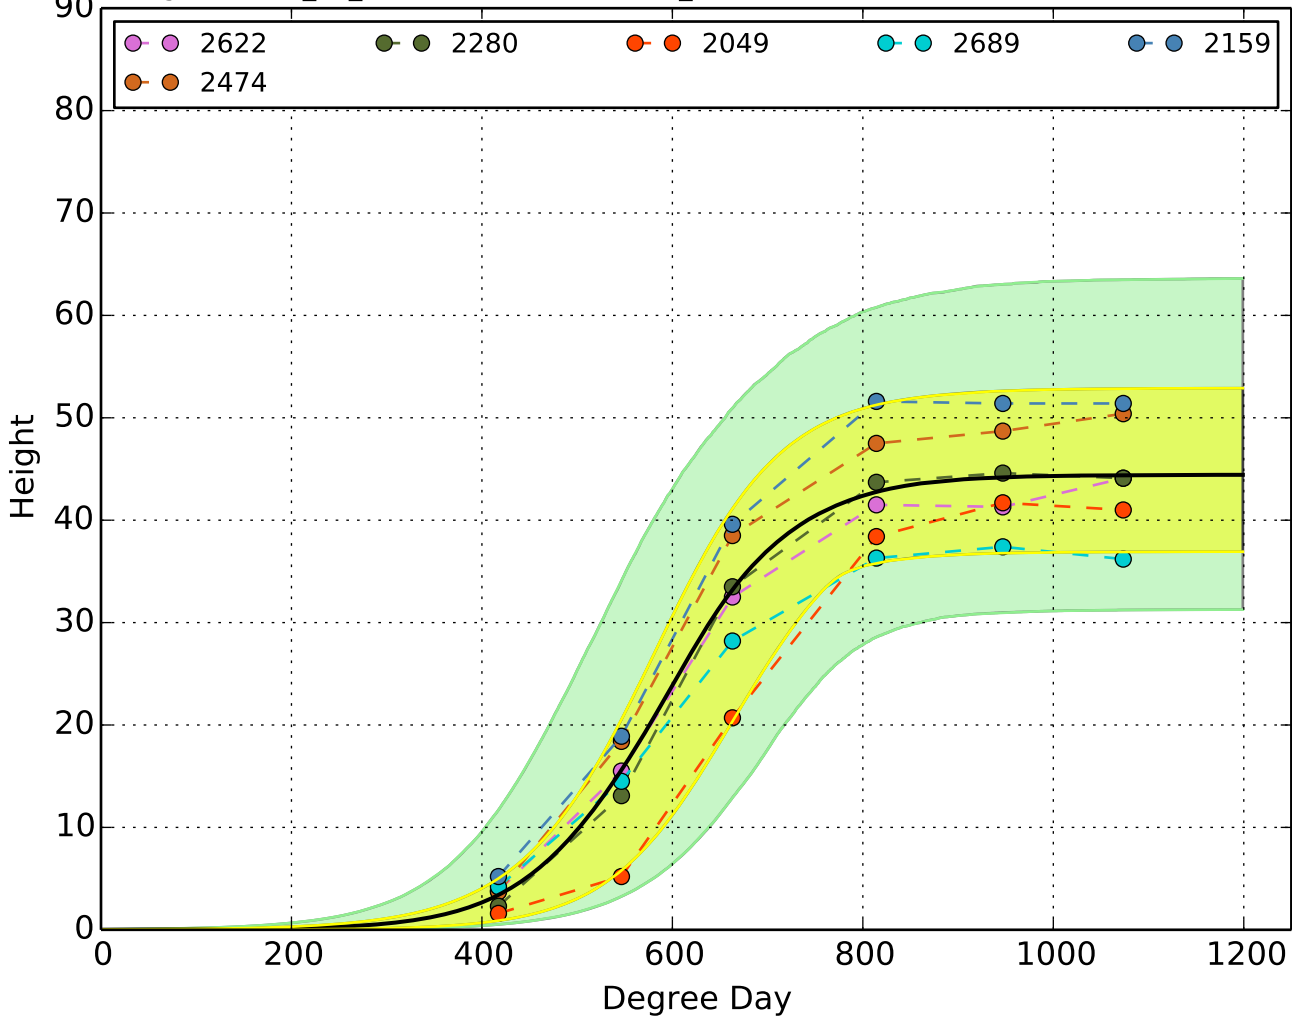

HeightModel3\_v1\_ResErrModel,Treat= UN\_2011,Line 205 (#Inv=6);95CI GrowthCurves

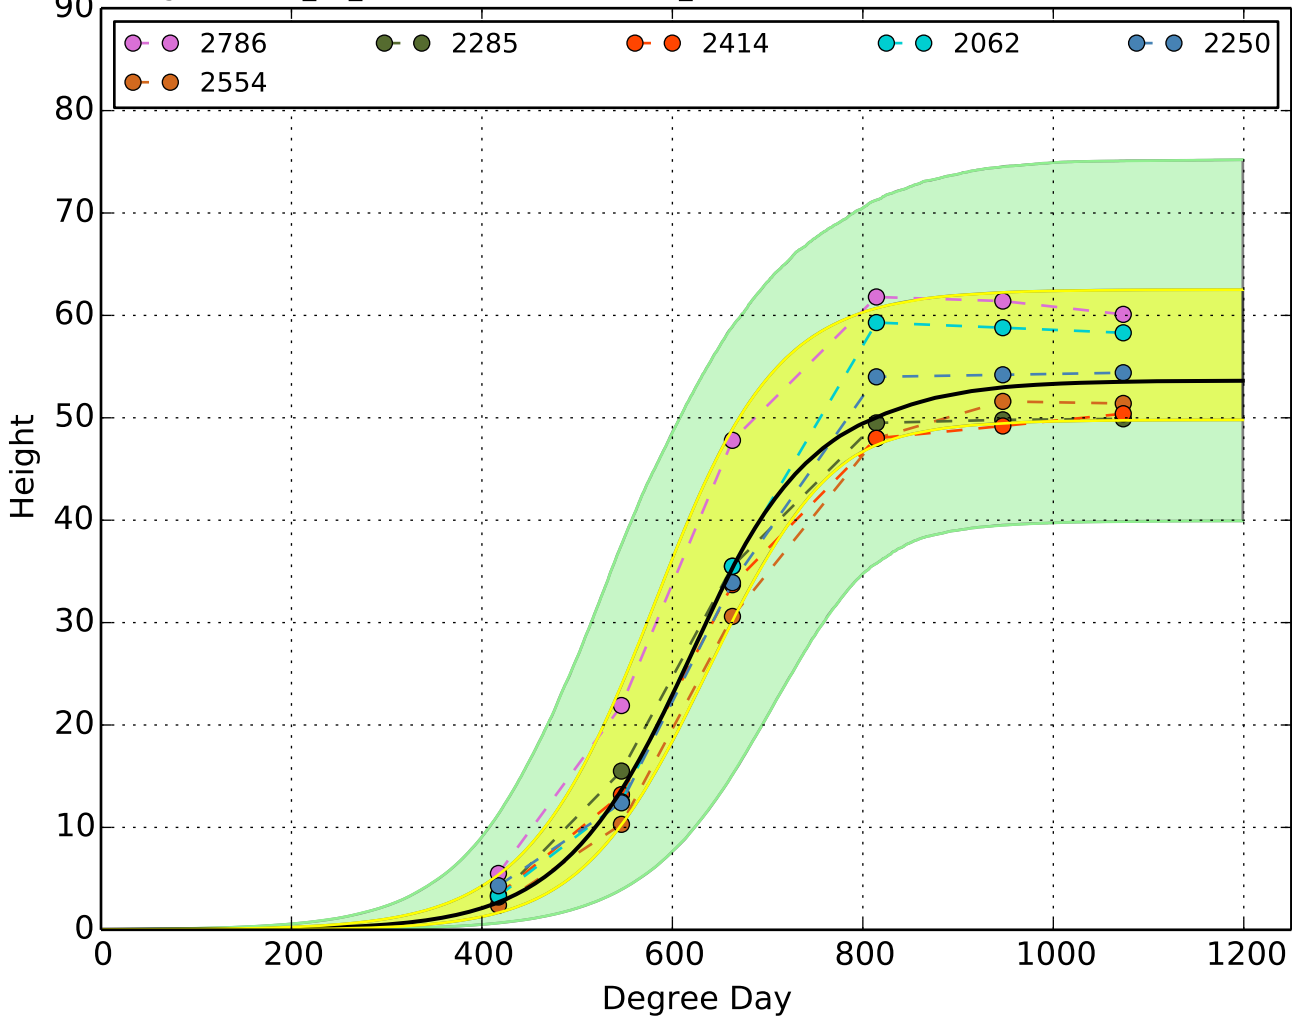

HeightModel3\_v1\_ResErrModel,Treat= UN\_2011,Line 206 (#Inv=6);95CI GrowthCurves

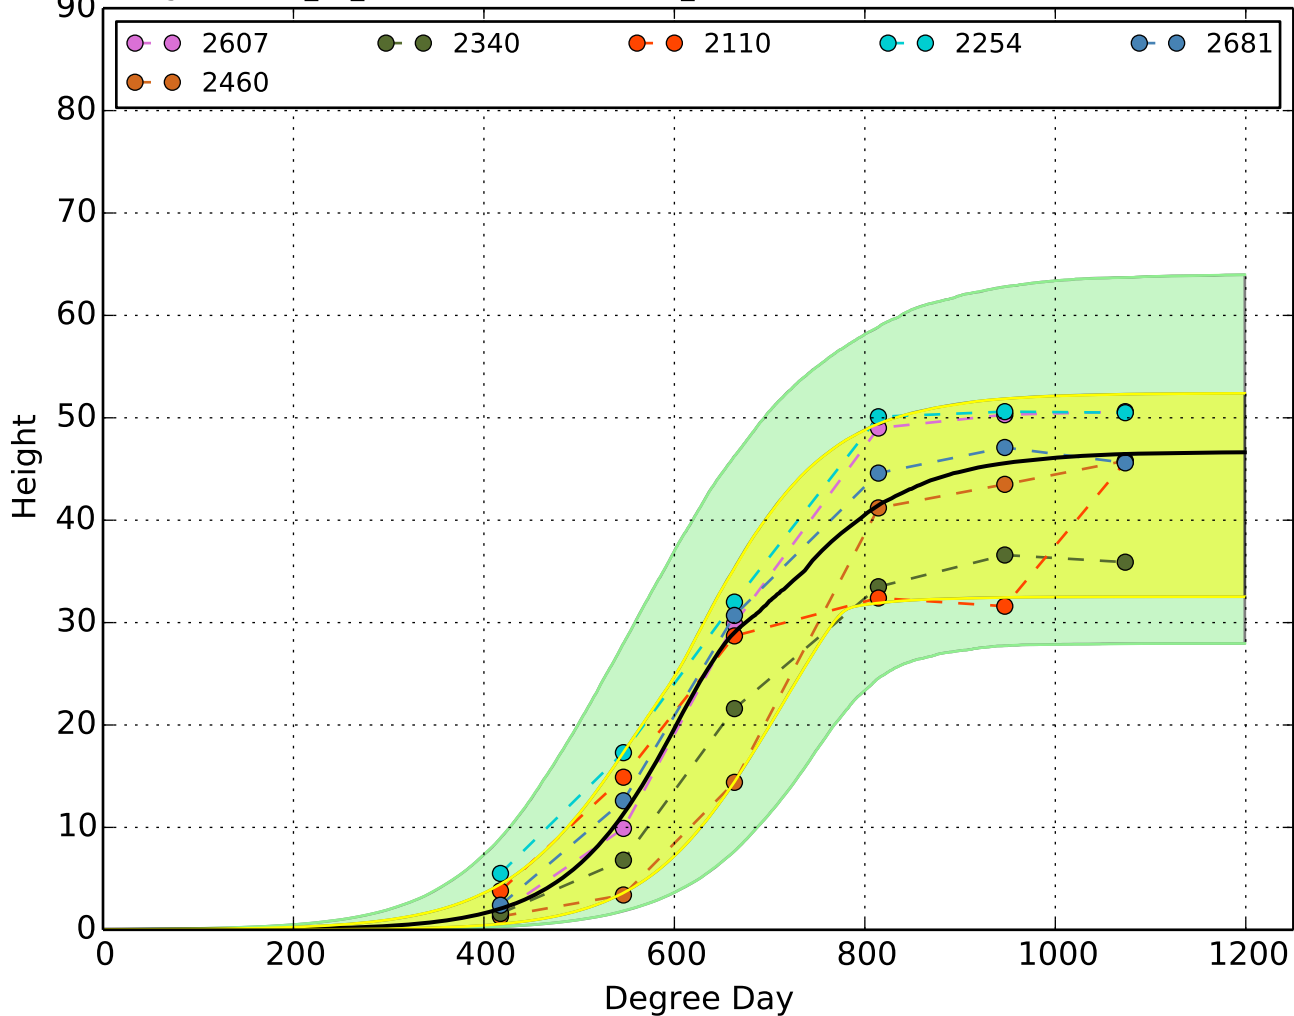



HeightModel3\_v1\_ResErrModel,Treat= UN\_2011,Line 207 (#Inv=4);95CI GrowthCurves

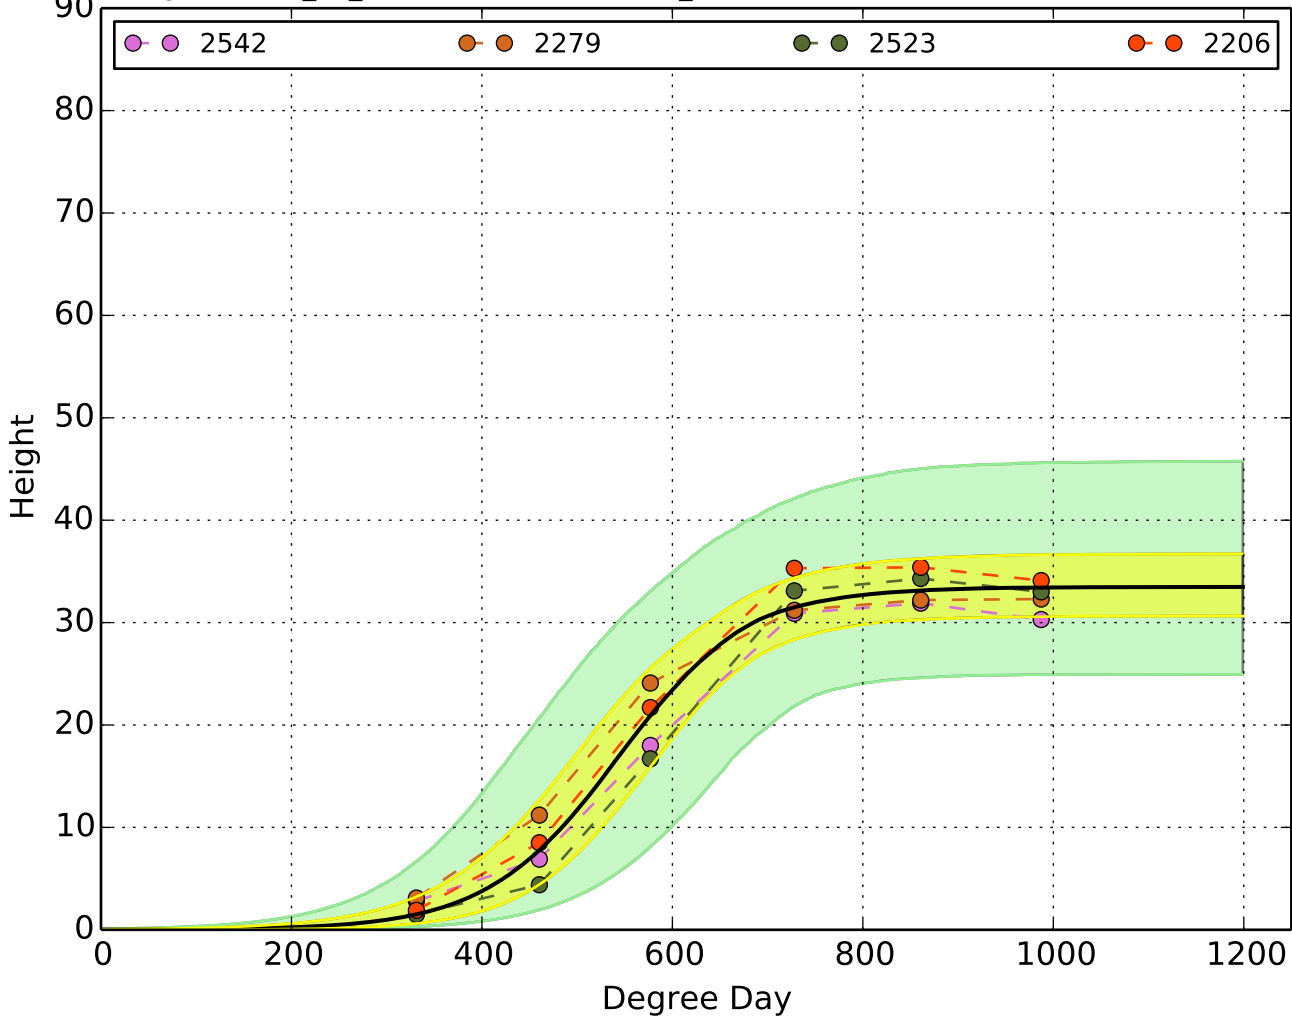

HeightModel3\_v1\_ResErrModel,Treat= UN\_2011,Line 208 (#Inv=5);95CI GrowthCurves

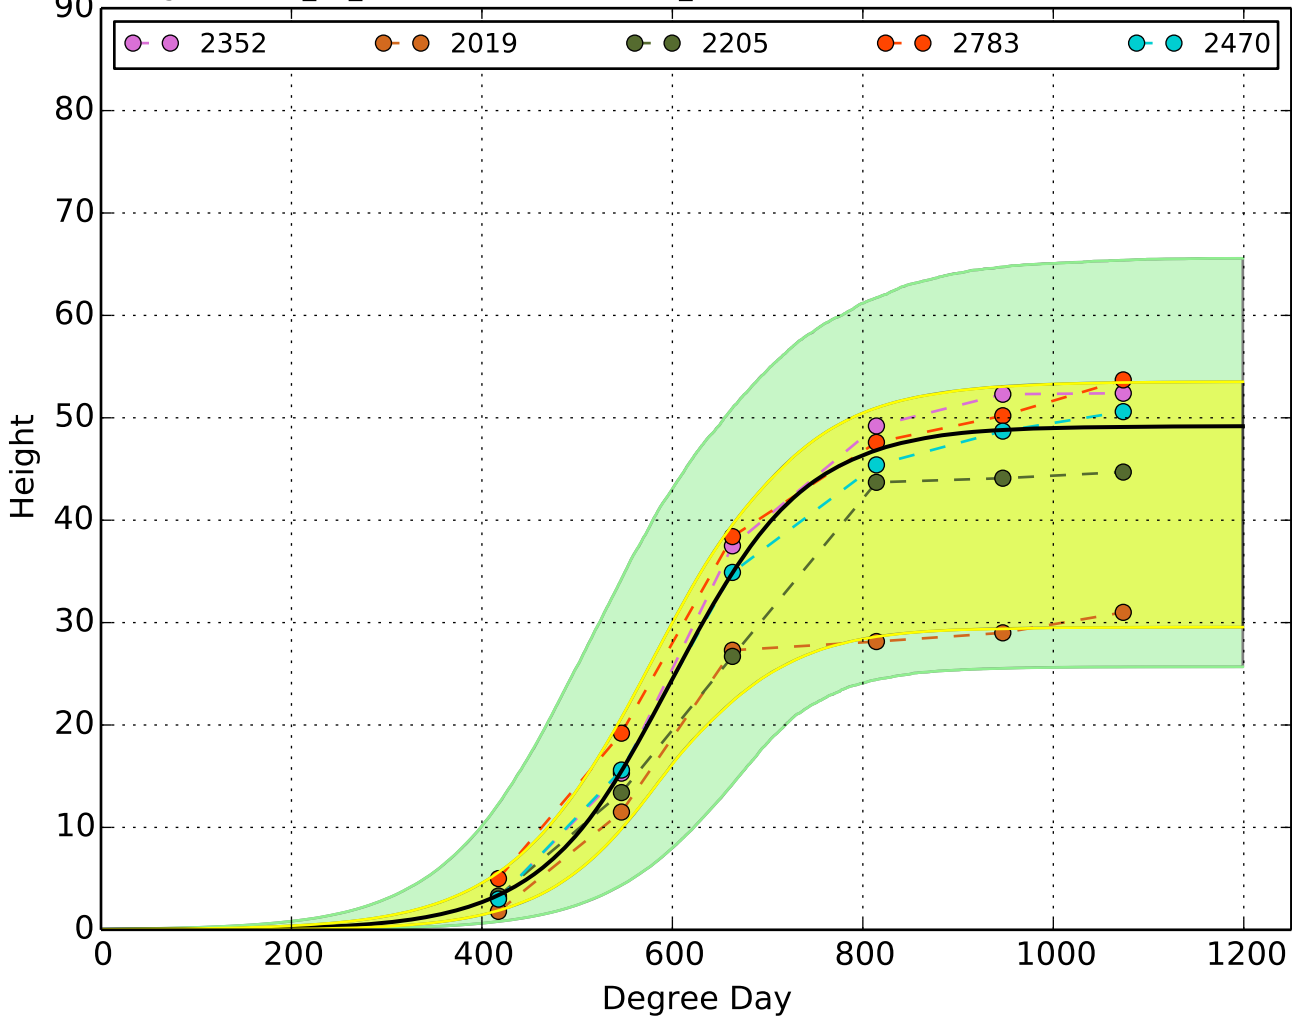

HeightModel3\_v1\_ResErrModel,Treat= UN\_2011,Line 211 (#Inv=4);95CI GrowthCurves

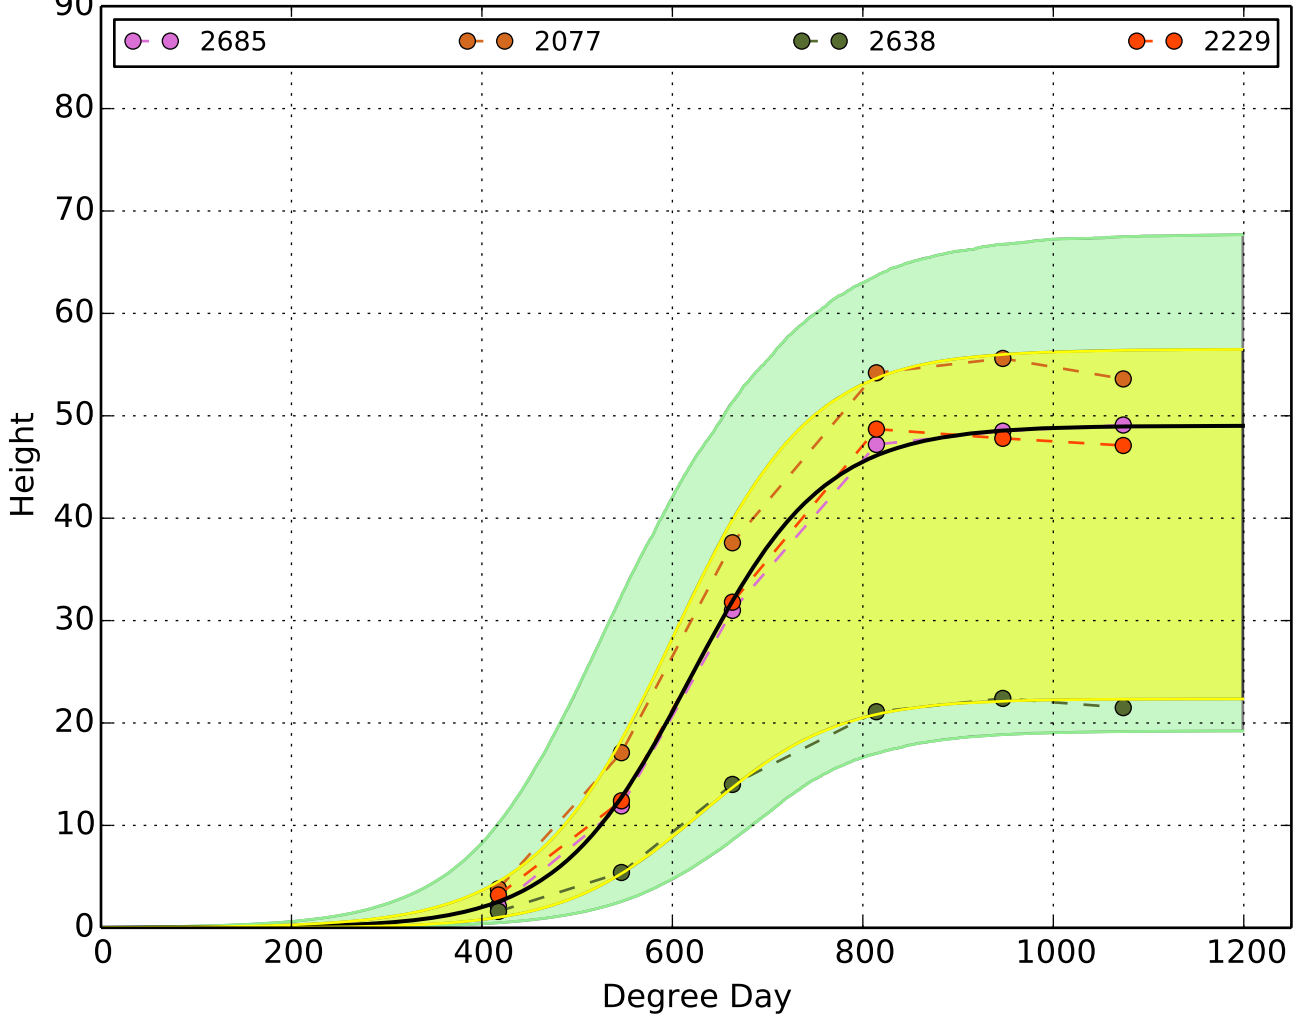

HeightModel3\_v1\_ResErrModel,Treat= UN\_2011,Line 212 (#Inv=5);95CI GrowthCurves

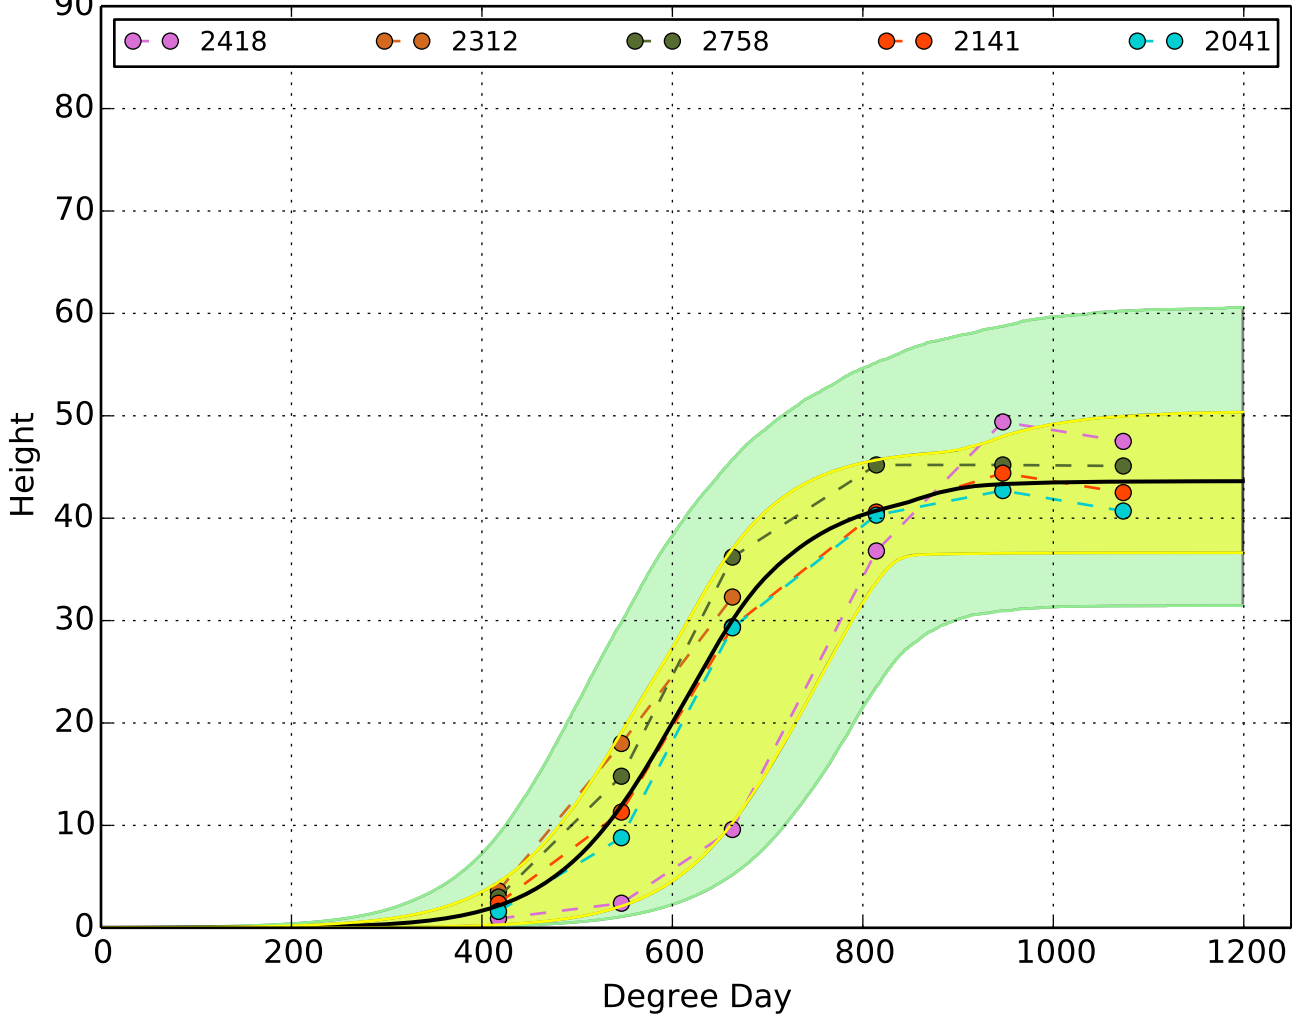

HeightModel3\_v1\_ResErrModel,Treat= UN\_2011,Line 213 (#Inv=6);95CI GrowthCurves

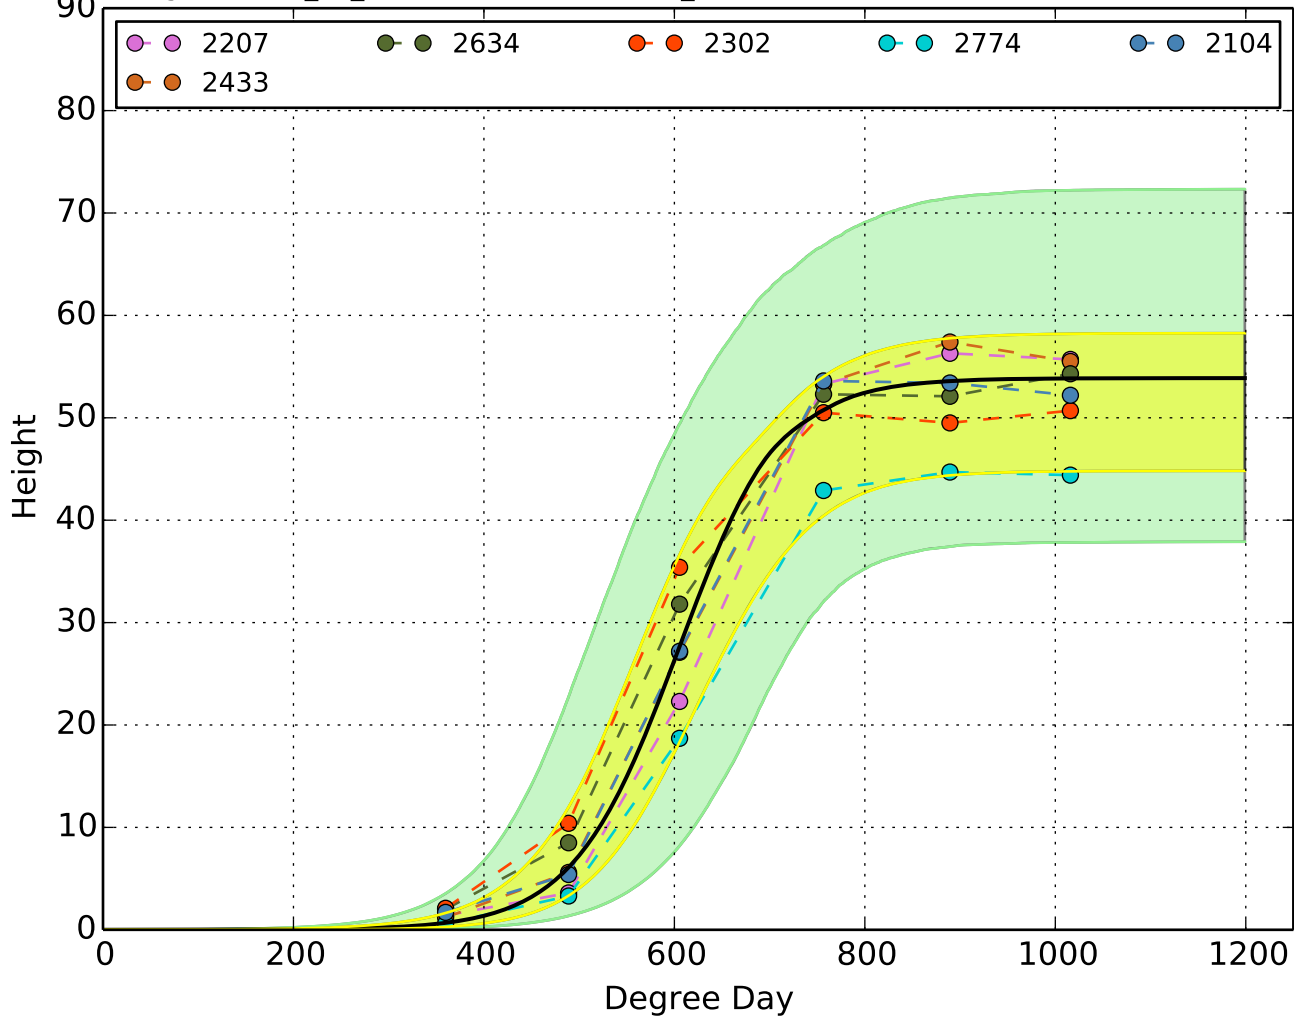

HeightModel3\_v1\_ResErrModel,Treat= UN\_2011,Line 215 (#Inv=5);95CI GrowthCurves

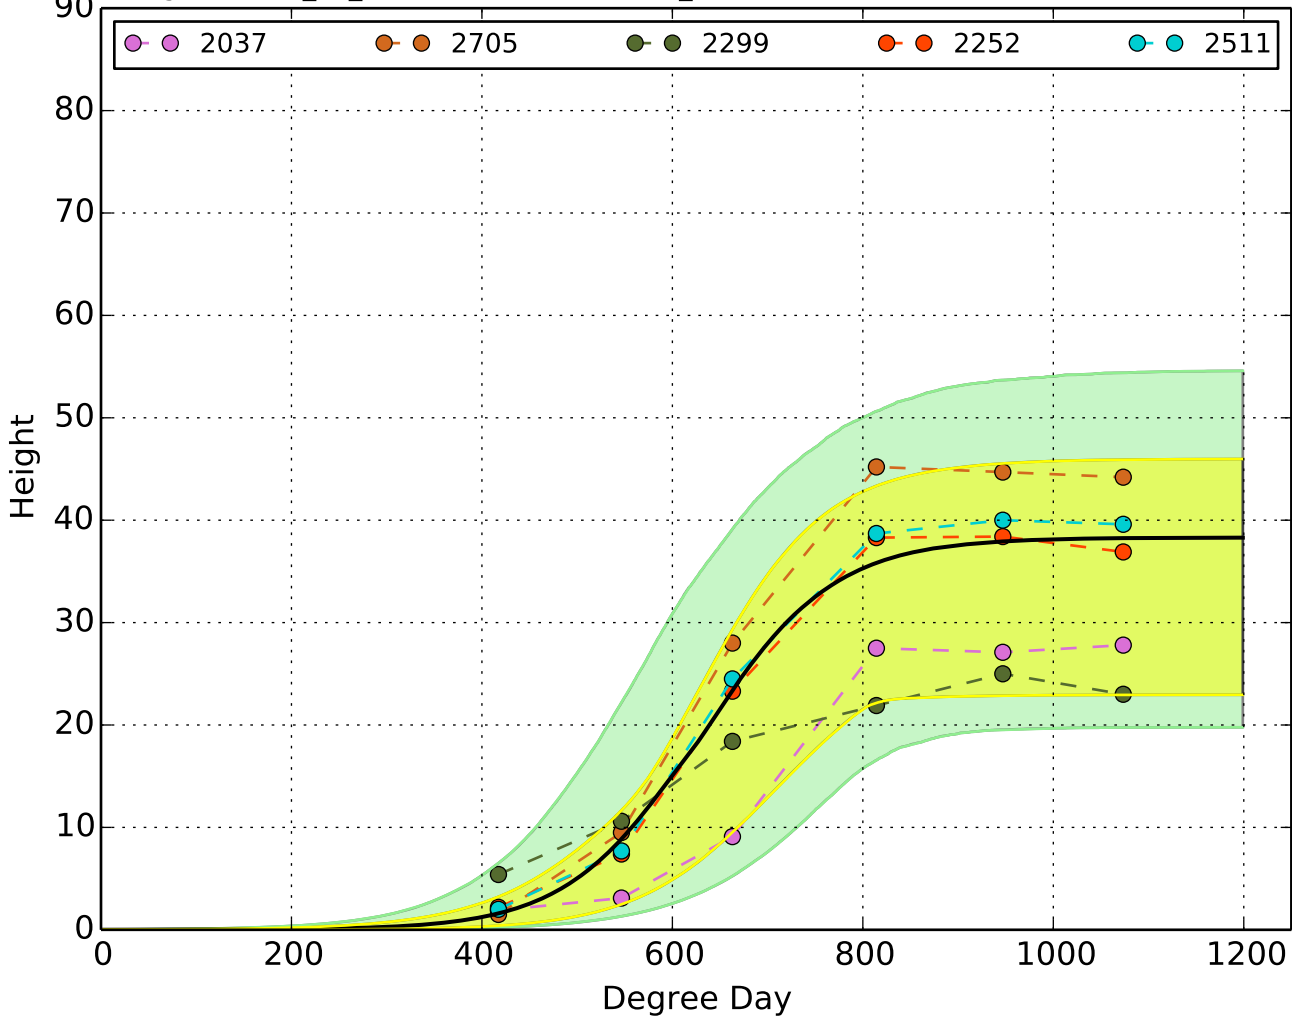

HeightModel3\_v1\_ResErrModel,Treat= UN\_2011,Line 222 (#Inv=6);95CI GrowthCurves

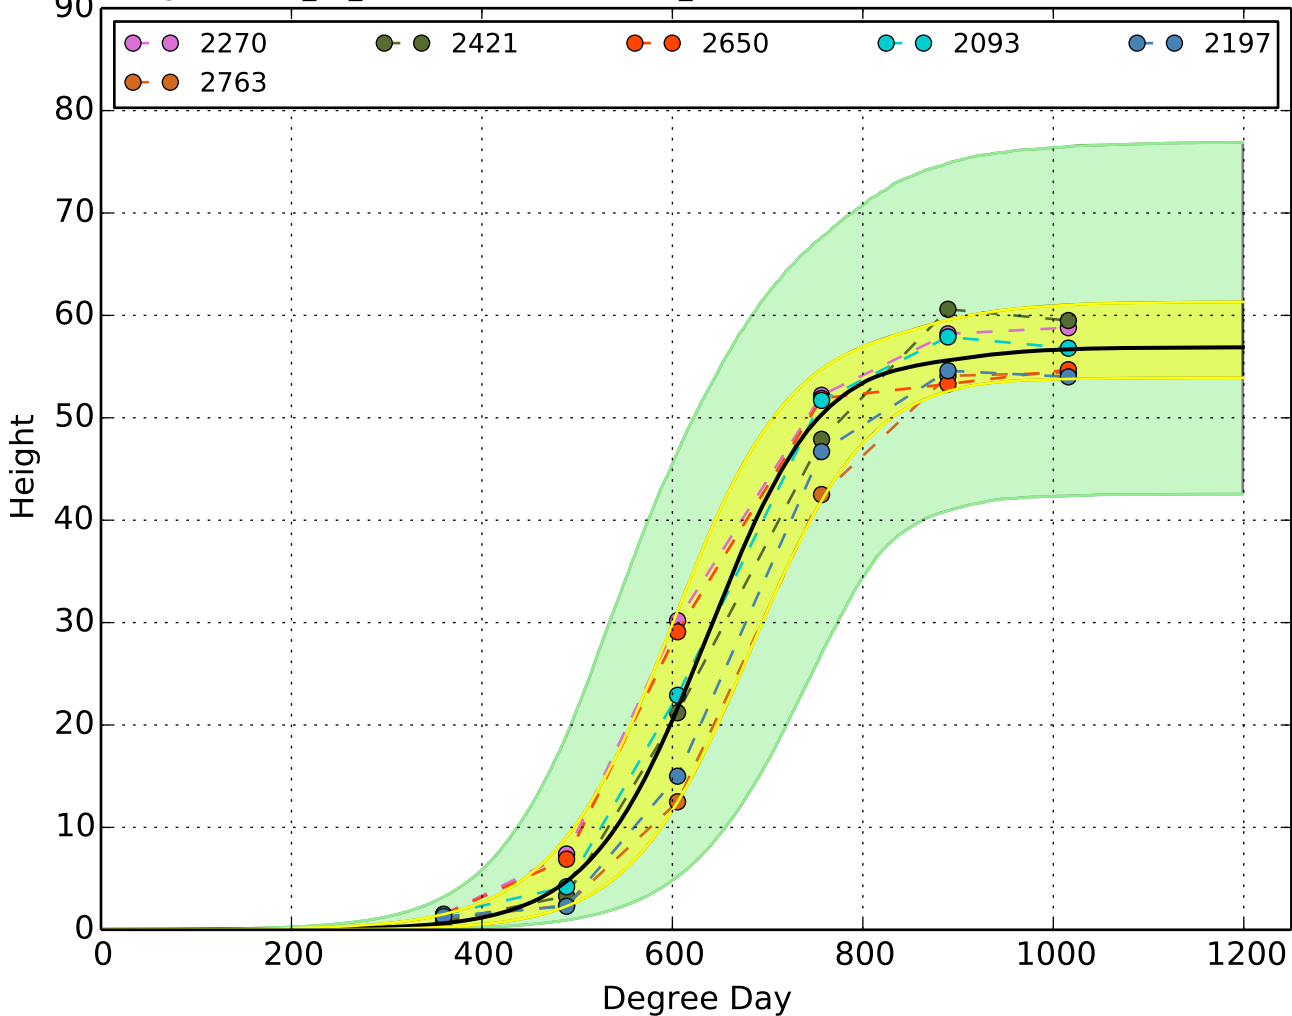

HeightModel3\_v1\_ResErrModel,Treat= UN\_2011,Line 223 (#Inv=6);95CI GrowthCurves

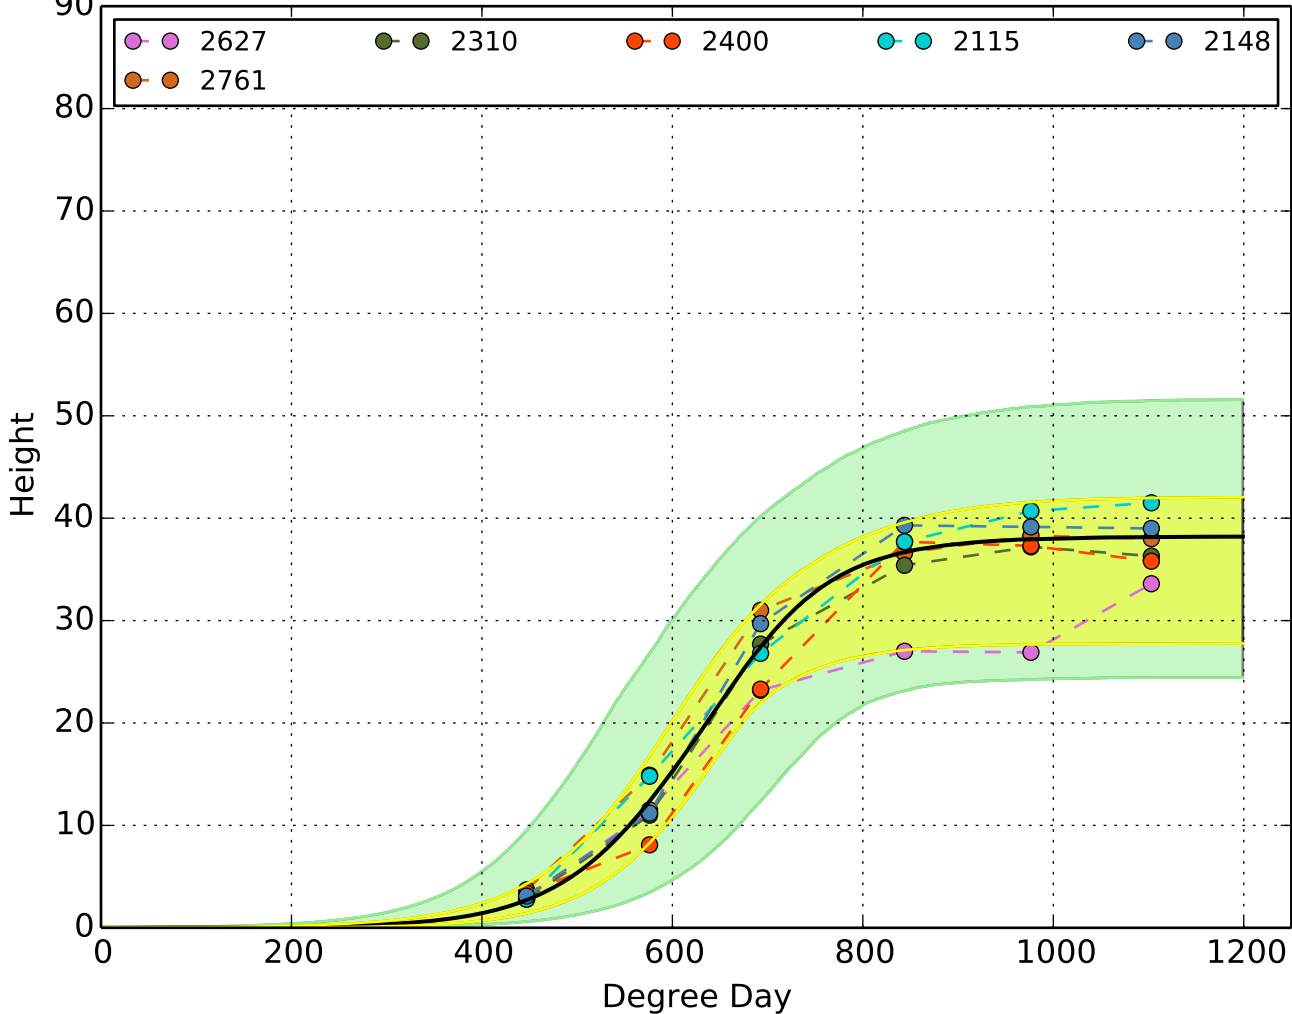



HeightModel3\_v1\_ResErrModel,Treat= UN\_2011,Line 225 (#Inv=6);95CI GrowthCurves

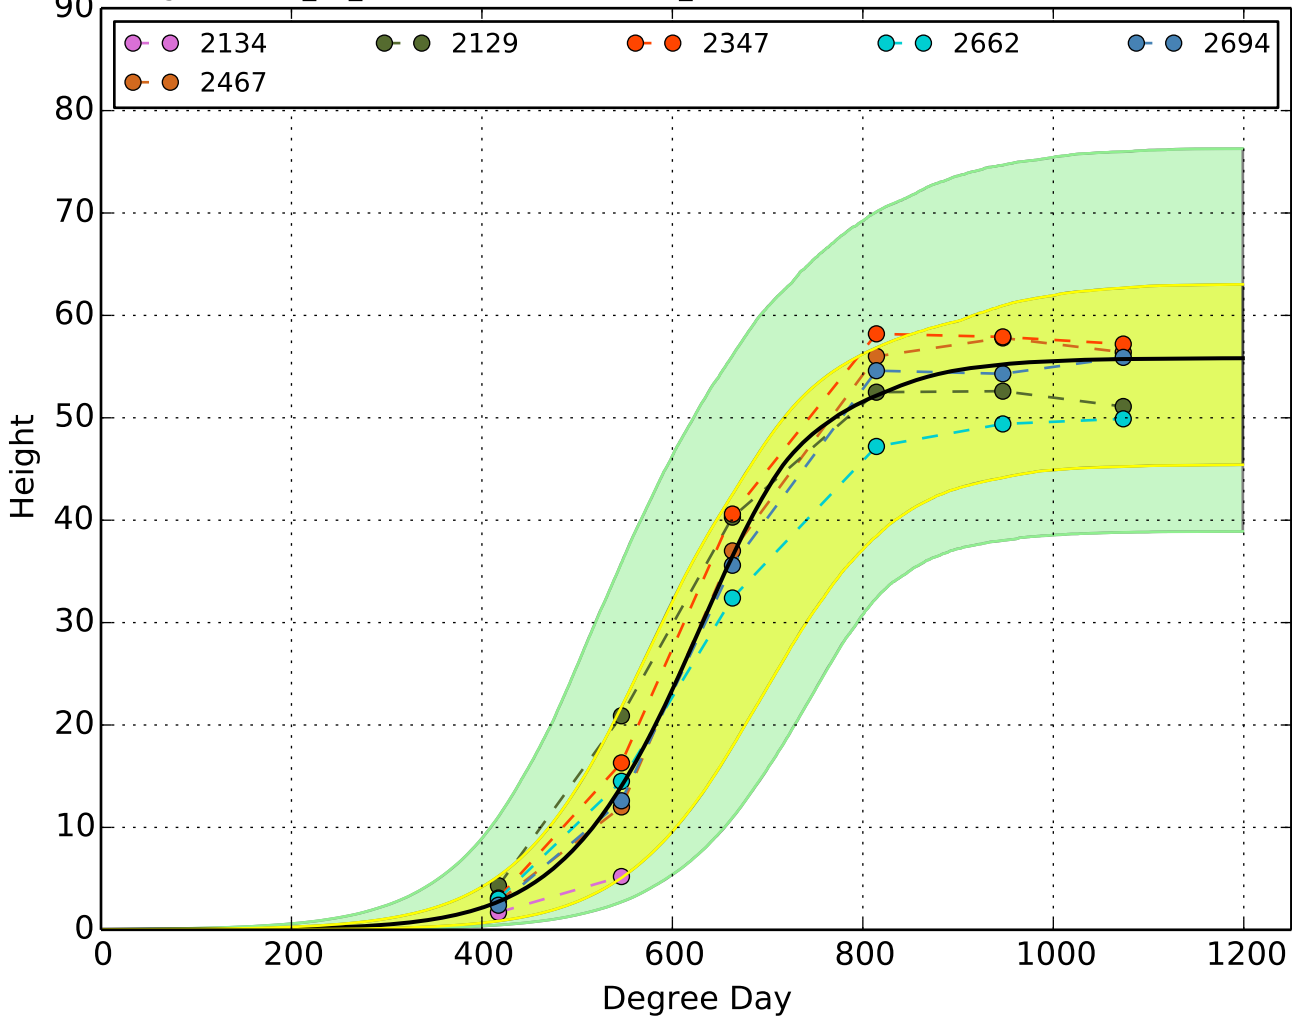

HeightModel3\_v1\_ResErrModel,Treat= UN\_2011,Line 228 (#Inv=4);95CI GrowthCurves

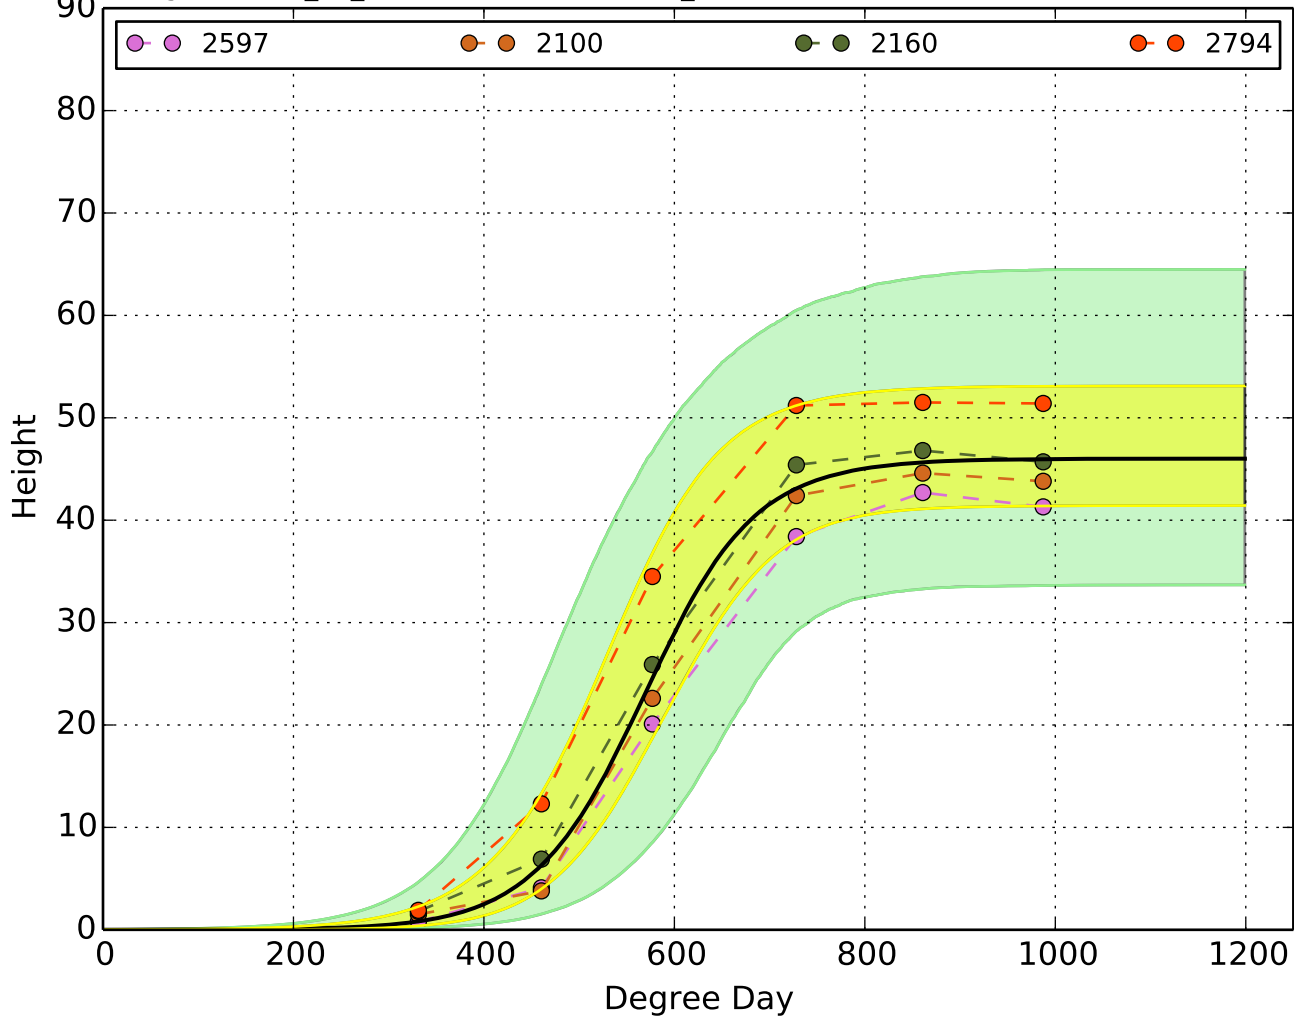

HeightModel3\_v1\_ResErrModel,Treat= UN\_2011,Line 229 (#Inv=5);95CI GrowthCurves

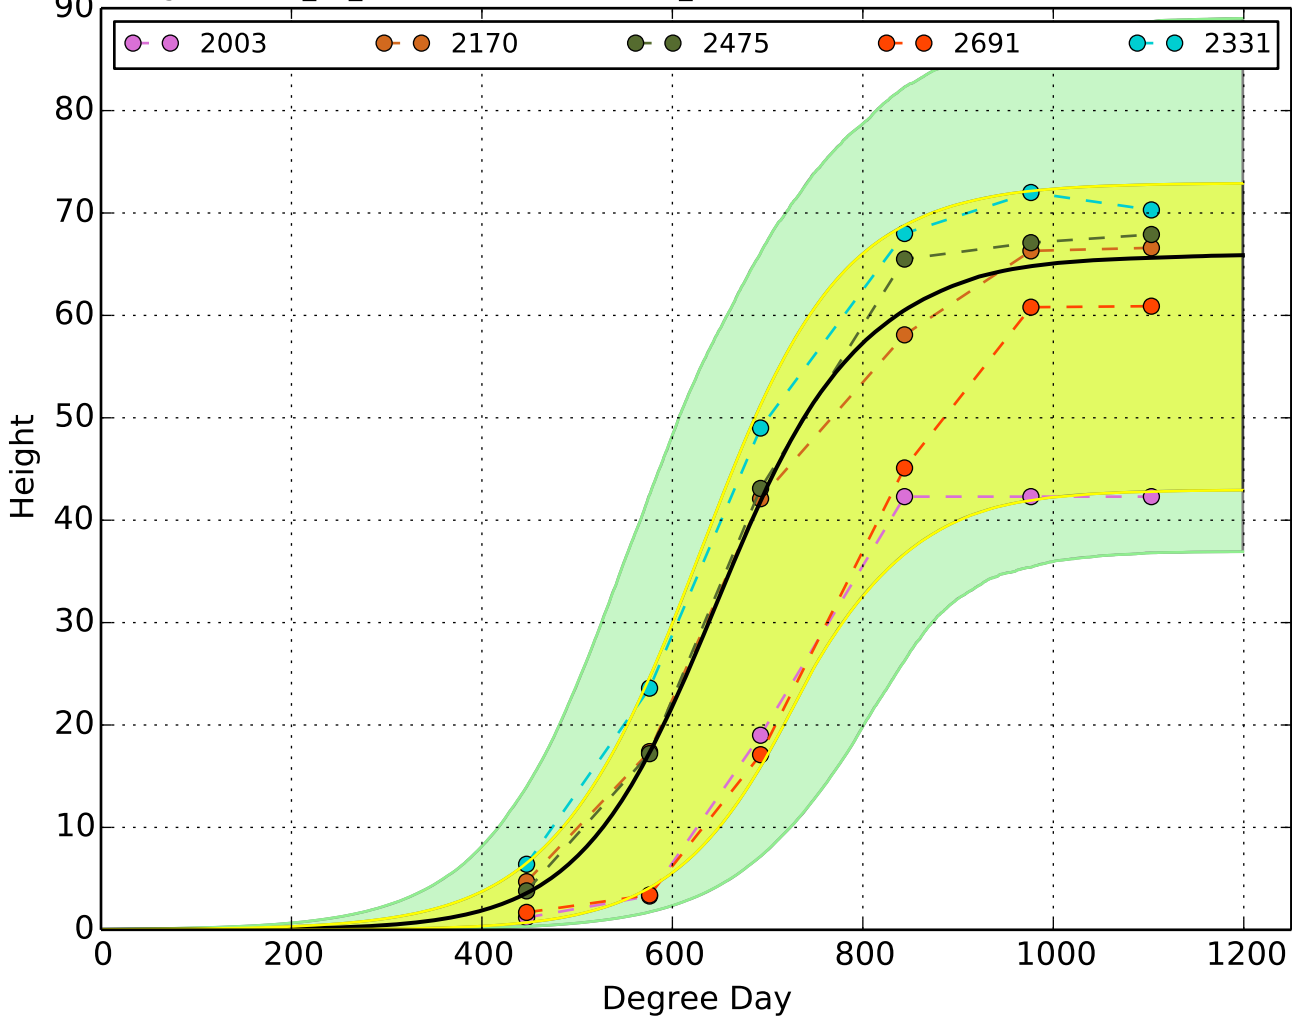

HeightModel3\_v1\_ResErrModel,Treat= UN\_2011,Line 232 (#Inv=5);95CI GrowthCurves

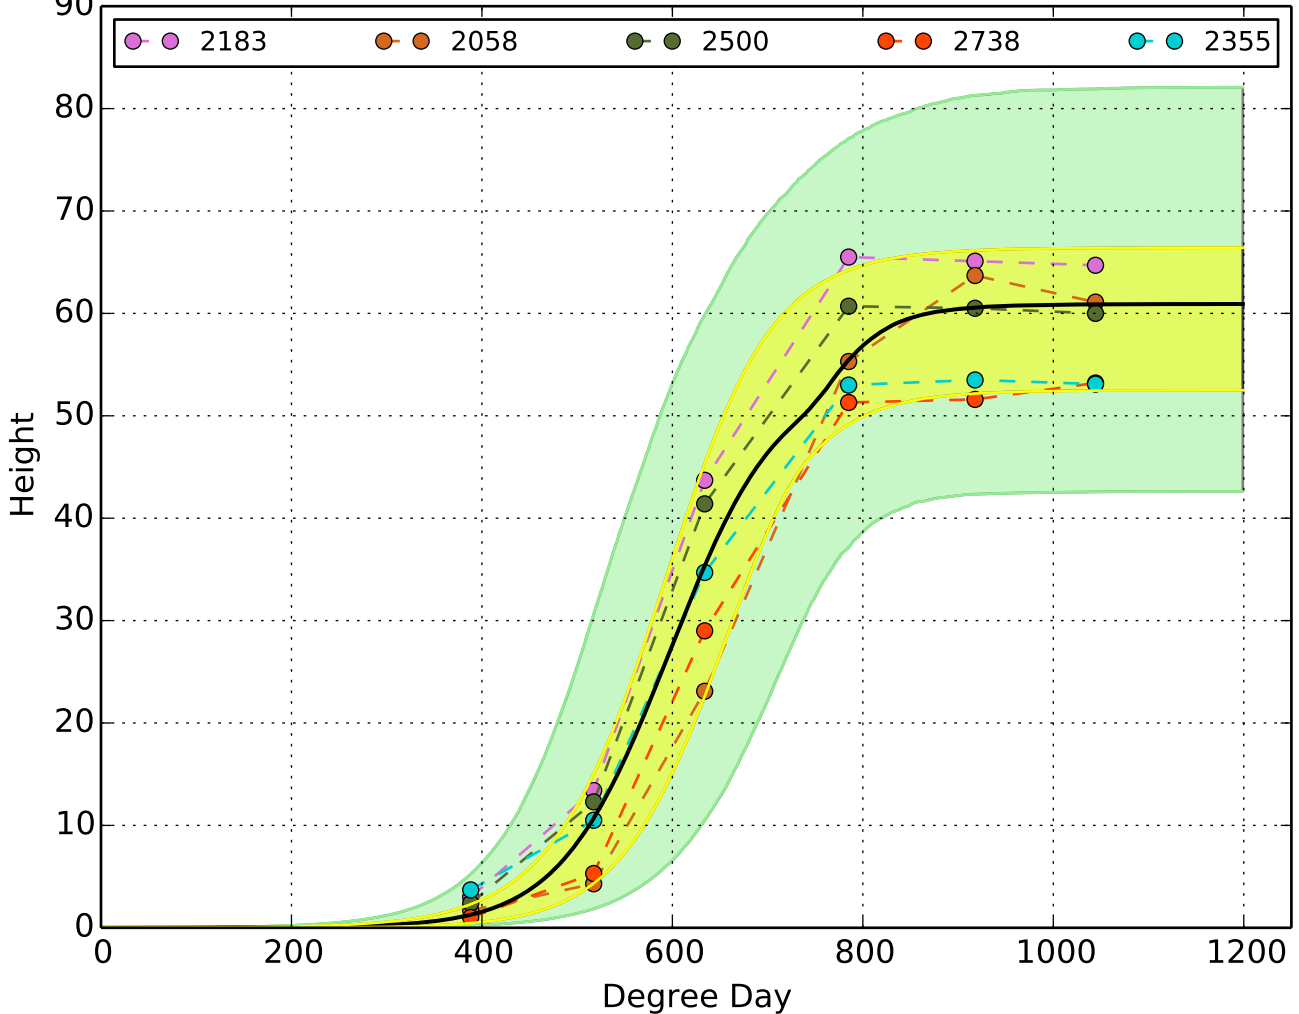

HeightModel3\_v1\_ResErrModel,Treat= UN\_2011,Line 234 (#Inv=6);95CI GrowthCurves

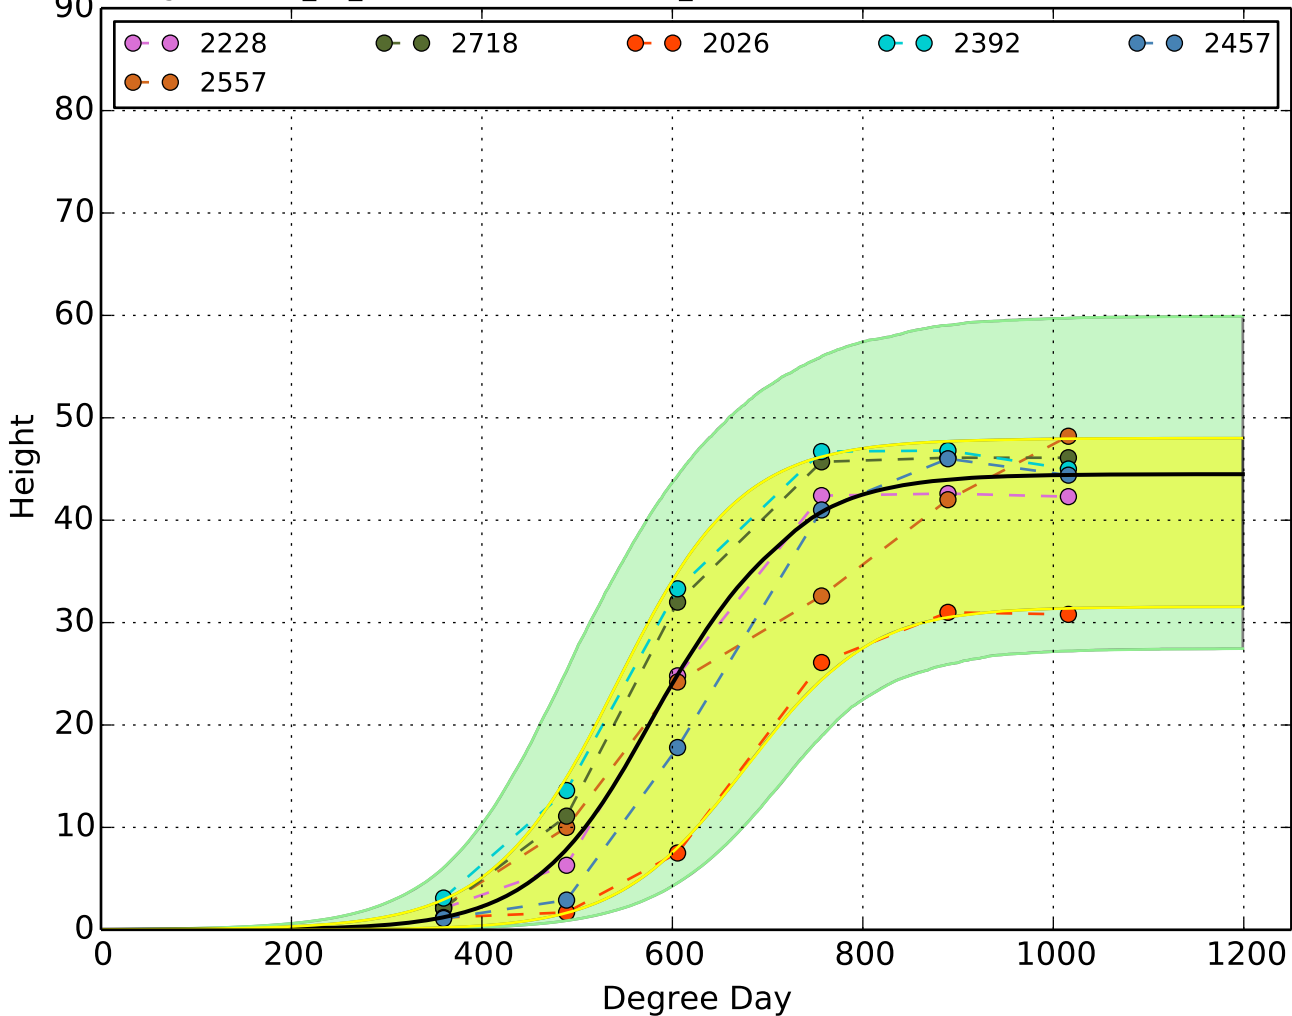

HeightModel3\_v1\_ResErrModel,Treat= UN\_2011,Line 235 (#Inv=5);95CI GrowthCurves

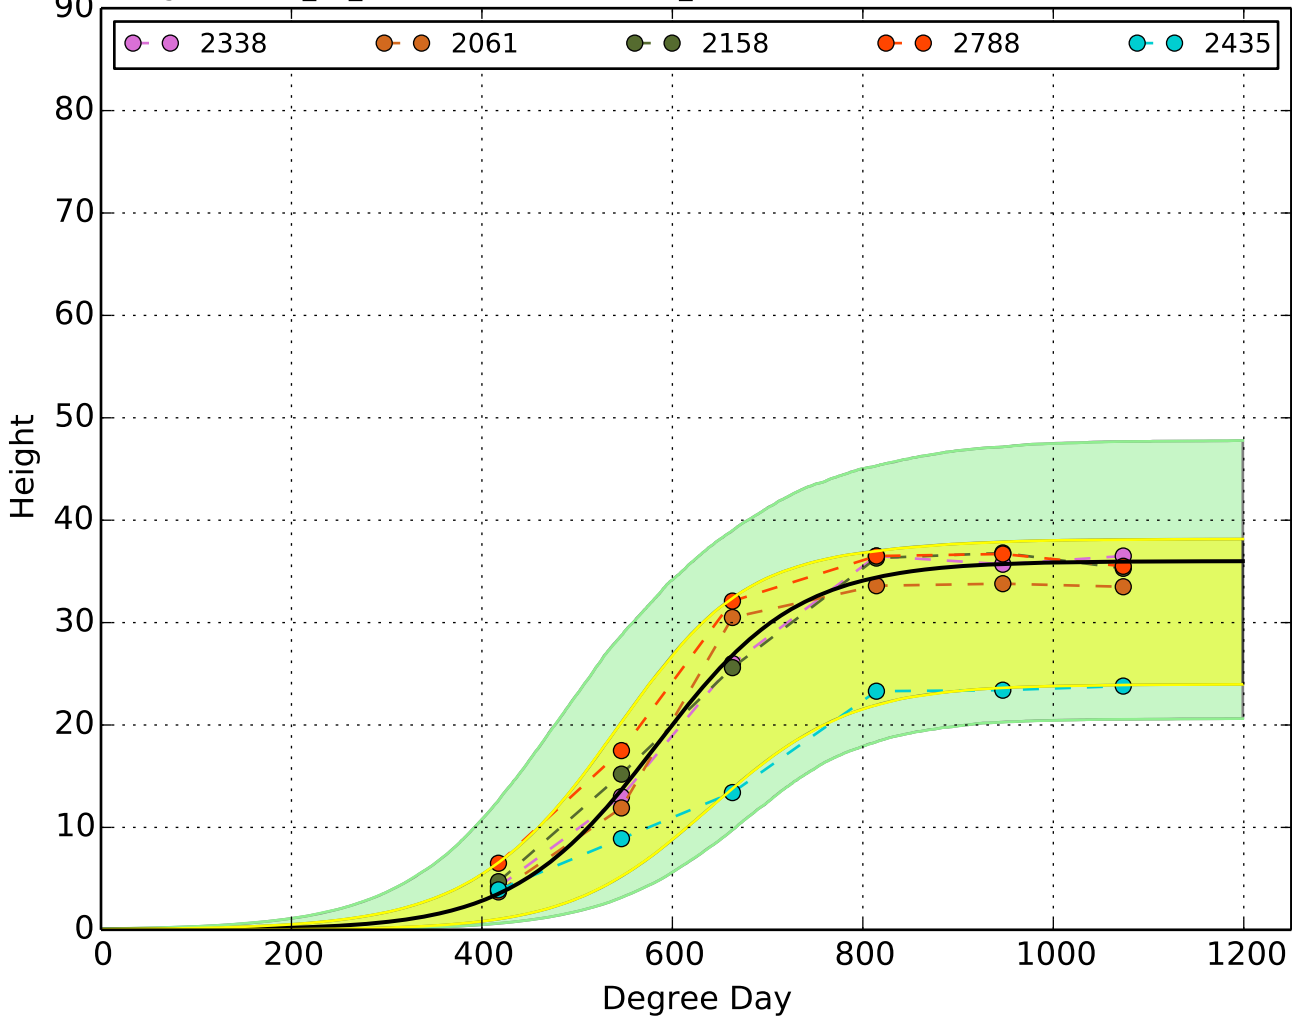

HeightModel3\_v1\_ResErrModel,Treat= UN\_2011,Line 240 (#Inv=6);95CI GrowthCurves

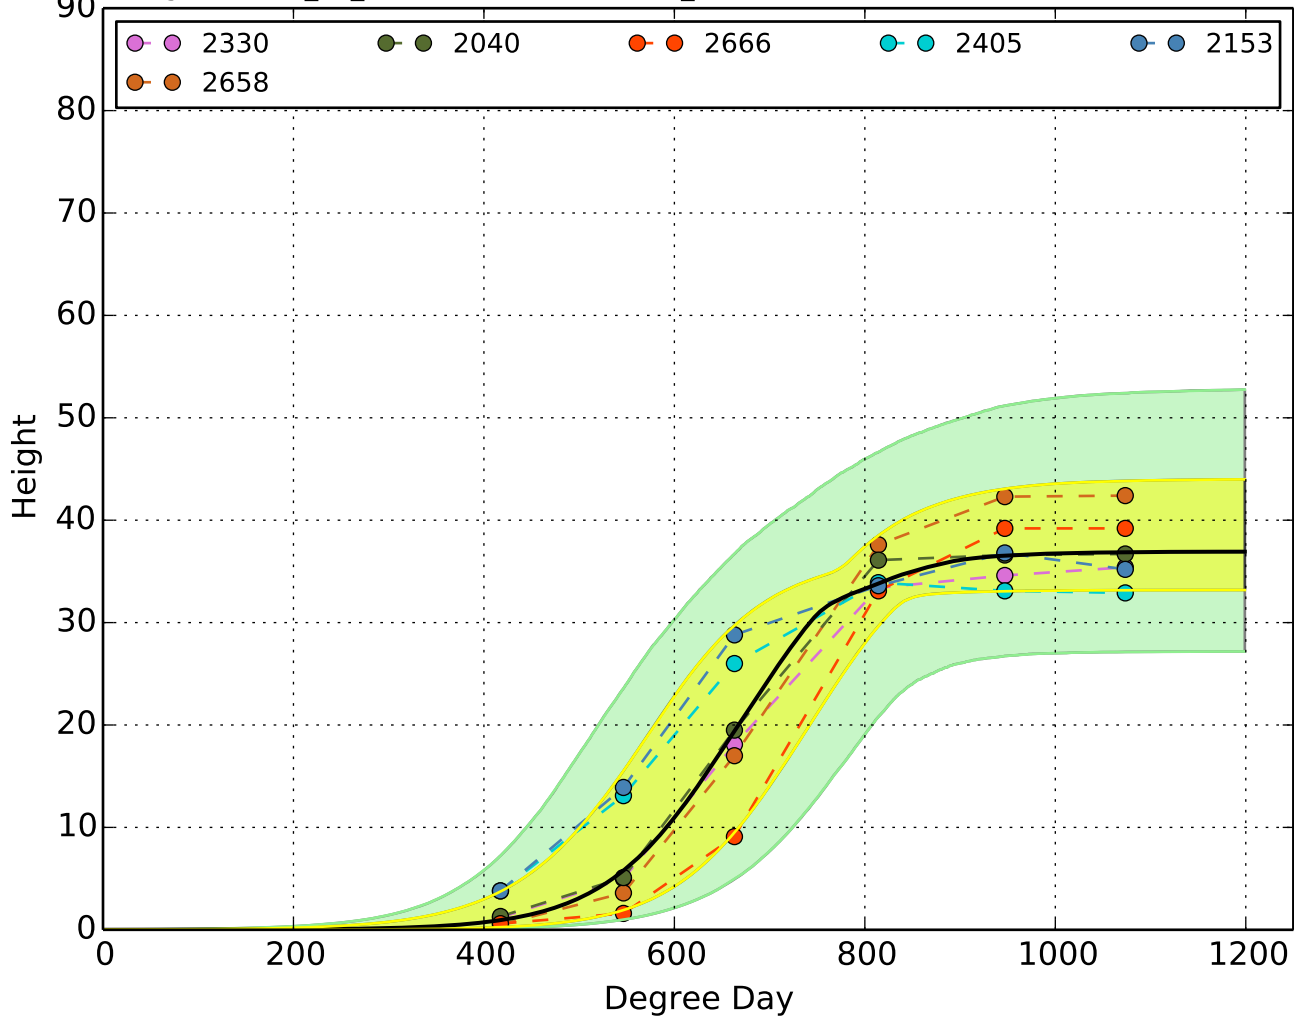

HeightModel3\_v1\_ResErrModel,Treat= UN\_2011,Line 242 (#Inv=5);95CI GrowthCurves

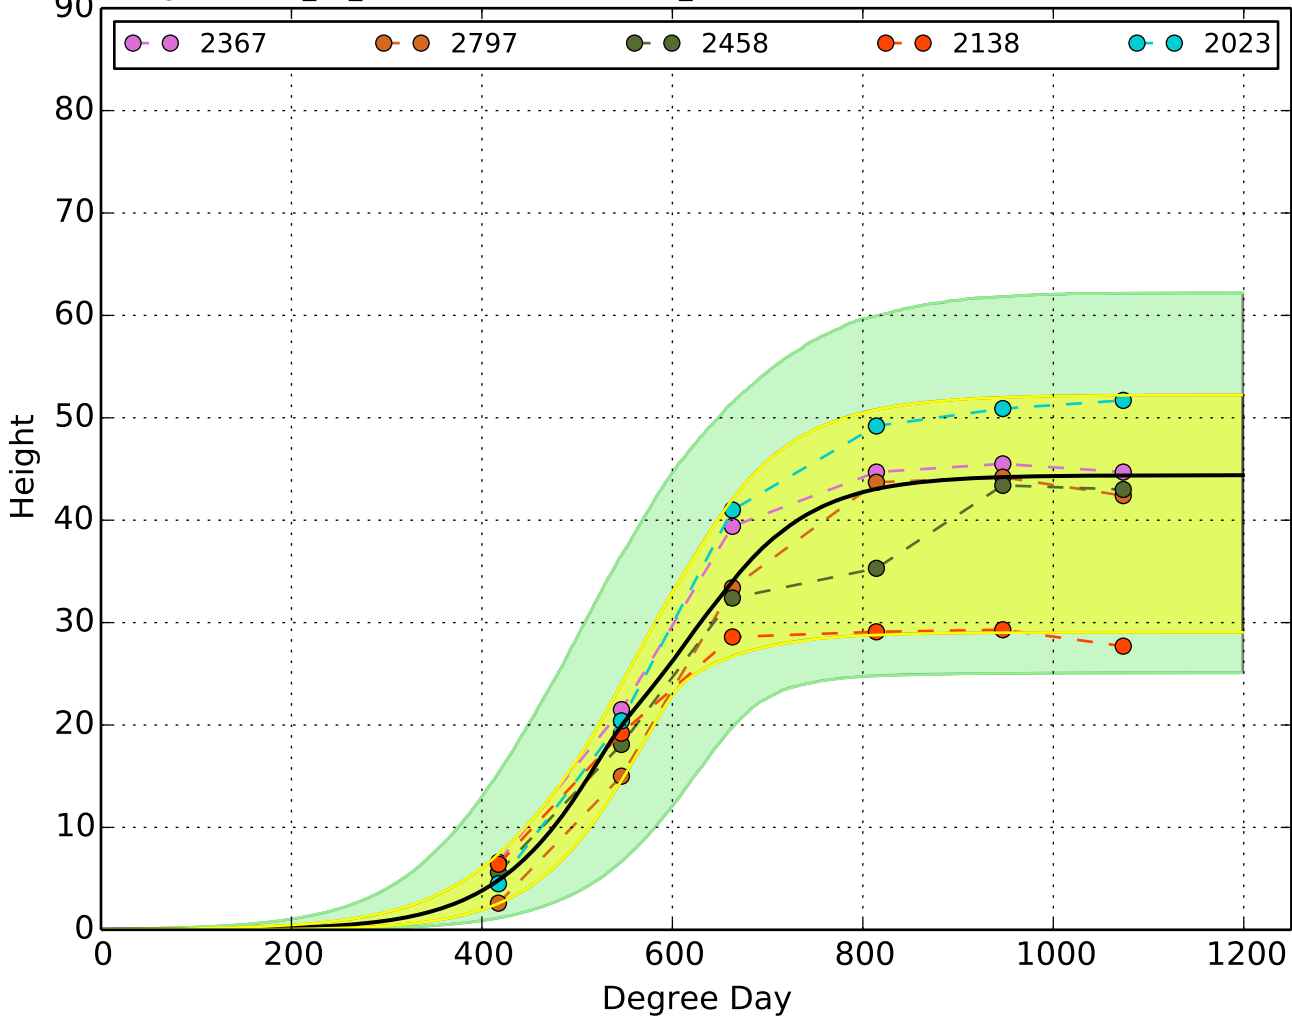



HeightModel3\_v1\_ResErrModel,Treat= UN\_2011,Line 243 (#Inv=6);95CI GrowthCurves

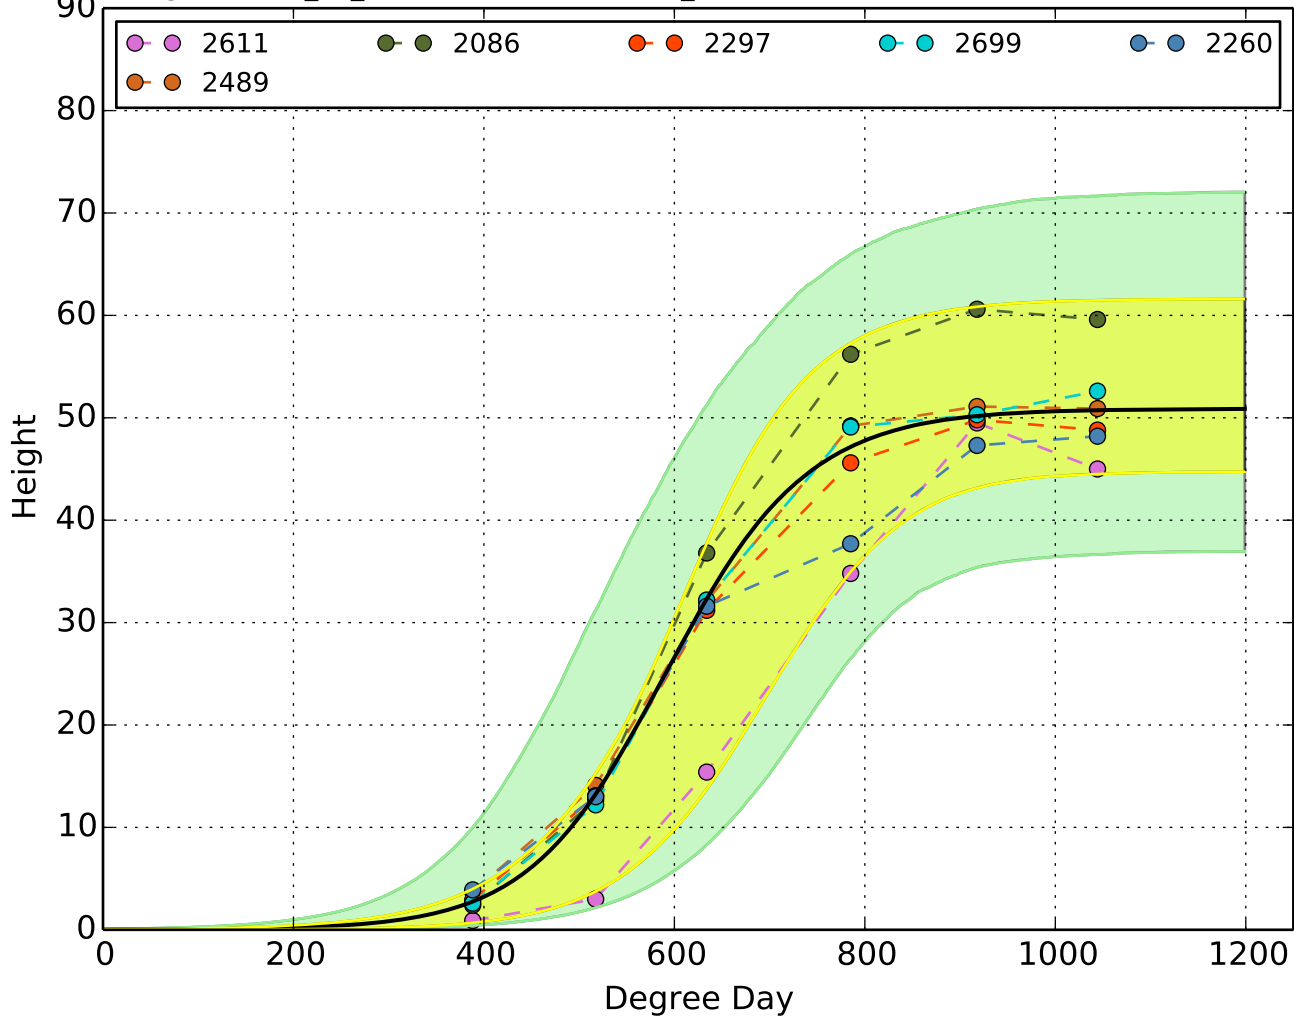

HeightModel3\_v1\_ResErrModel,Treat= UN\_2011,Line 248 (#Inv=5);95CI GrowthCurves

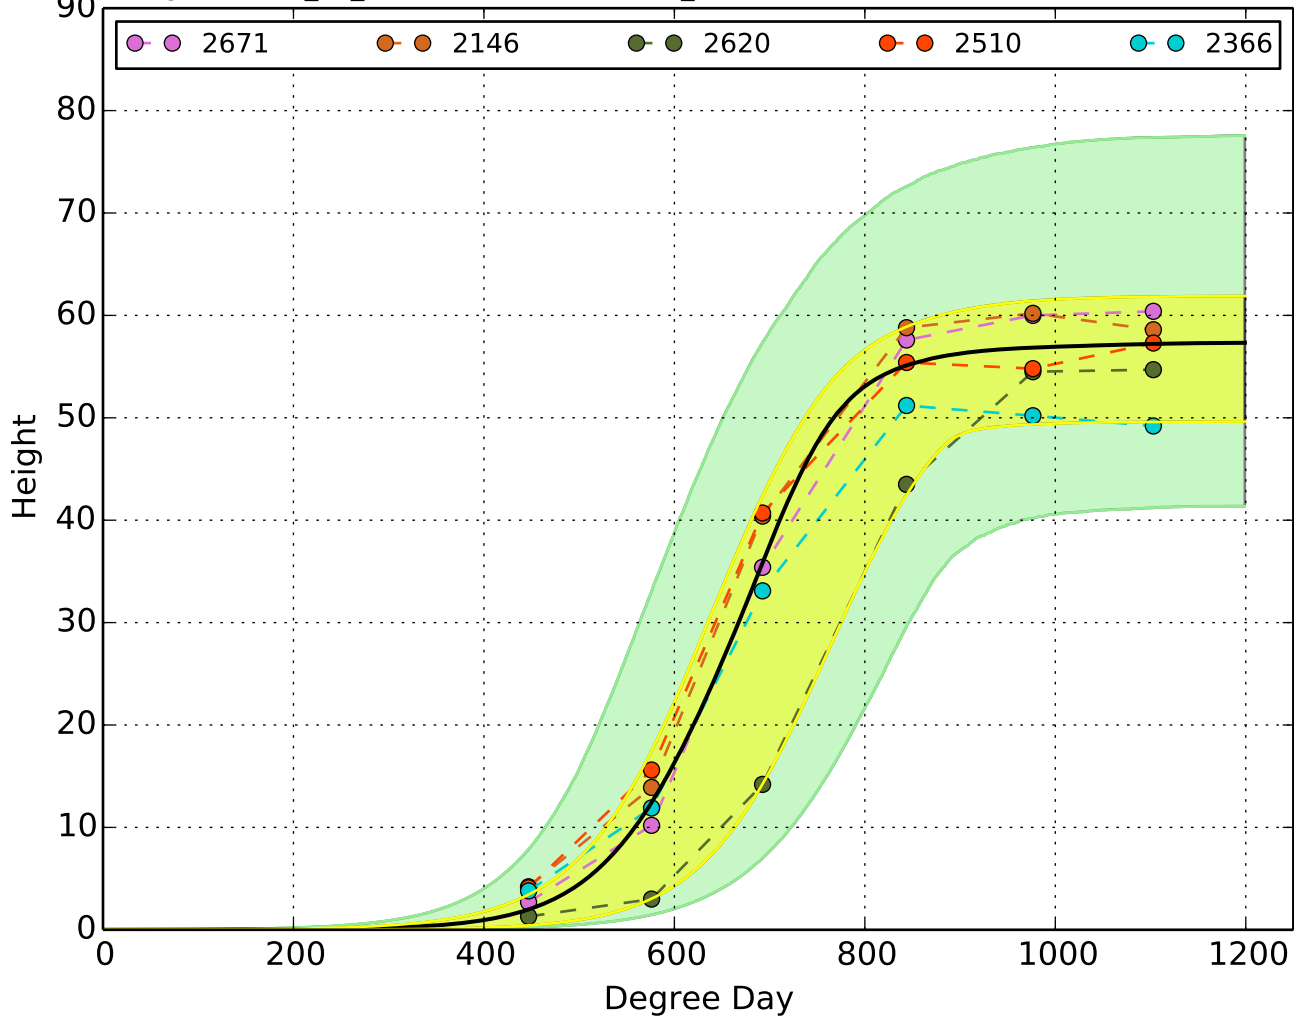

HeightModel3\_v1\_ResErrModel,Treat= UN\_2011,Line 250 (#Inv=6);95CI GrowthCurves

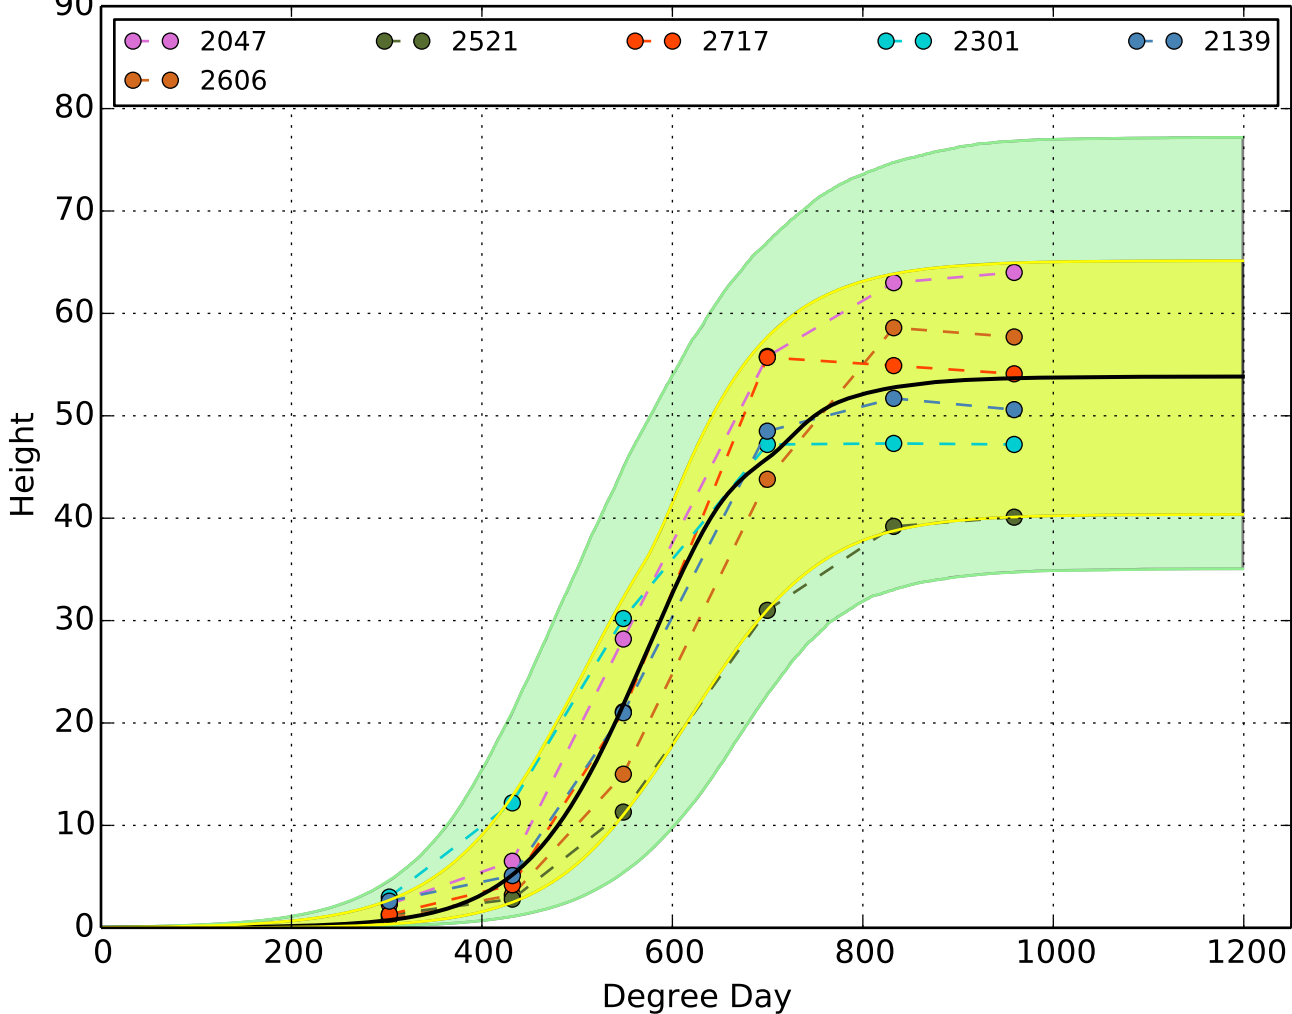

HeightModel3\_v1\_ResErrModel,Treat= UN\_2011,Line 251 (#Inv=6);95CI GrowthCurves

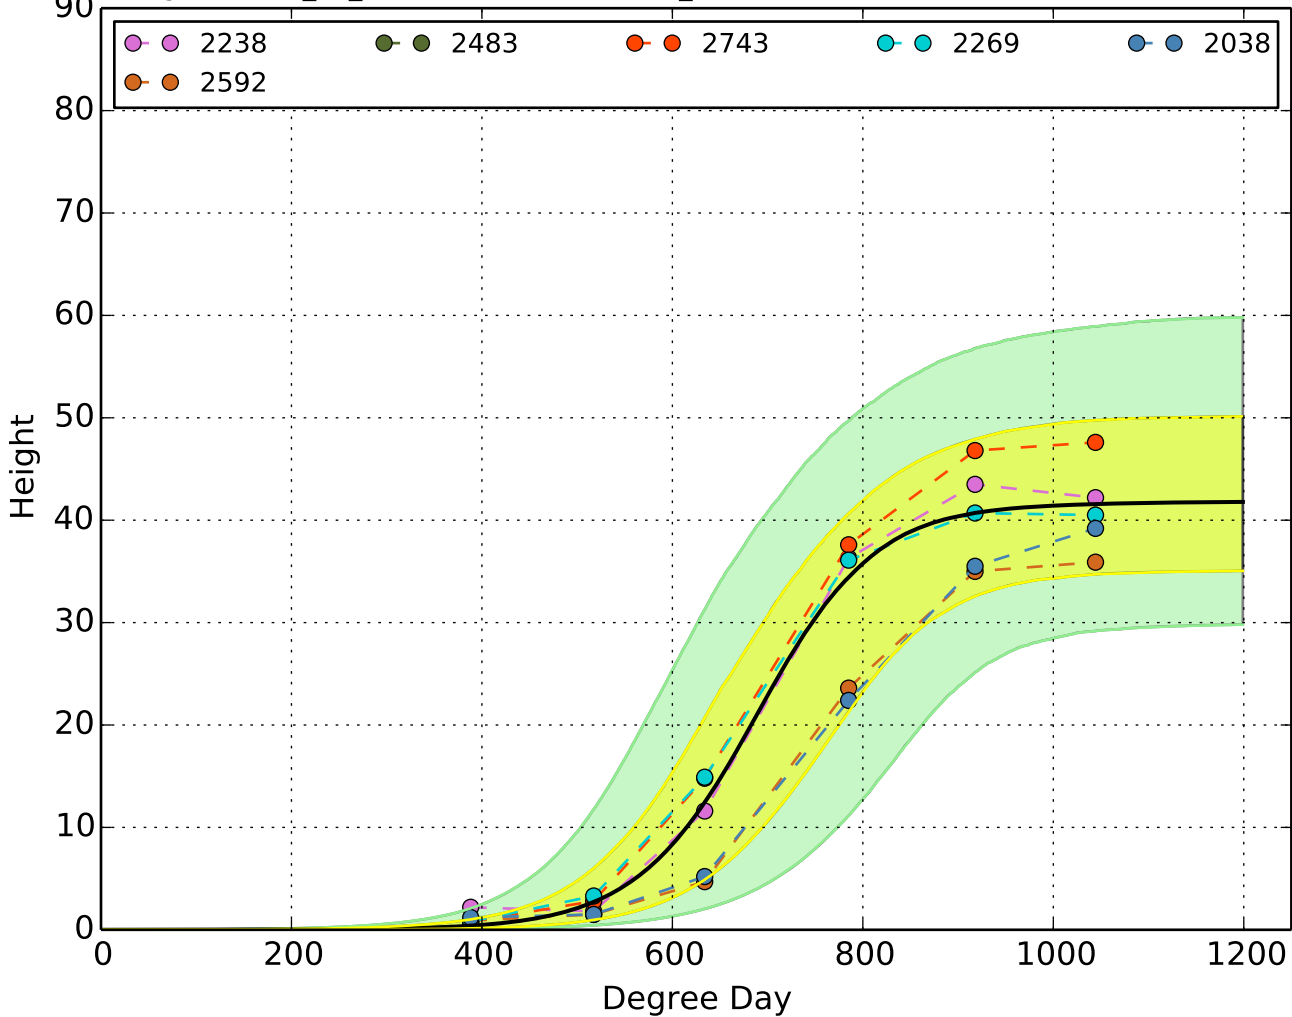

HeightModel3\_v1\_ResErrModel,Treat= UN\_2011,Line 253 (#Inv=4);95CI GrowthCurves

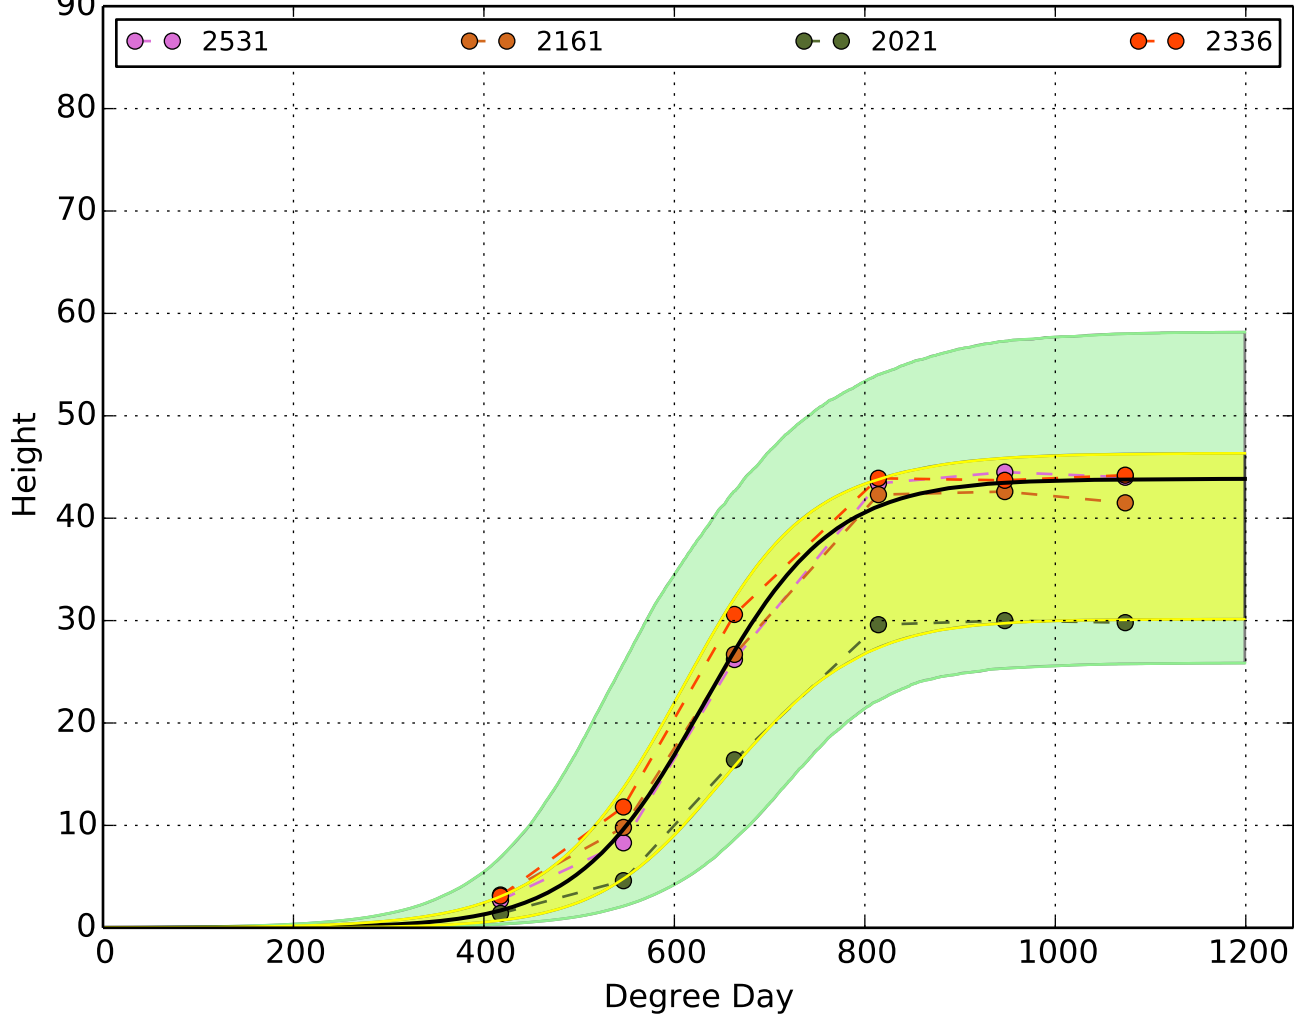

HeightModel3\_v1\_ResErrModel,Treat= UN\_2011,Line 255 (#Inv=6);95CI GrowthCurves

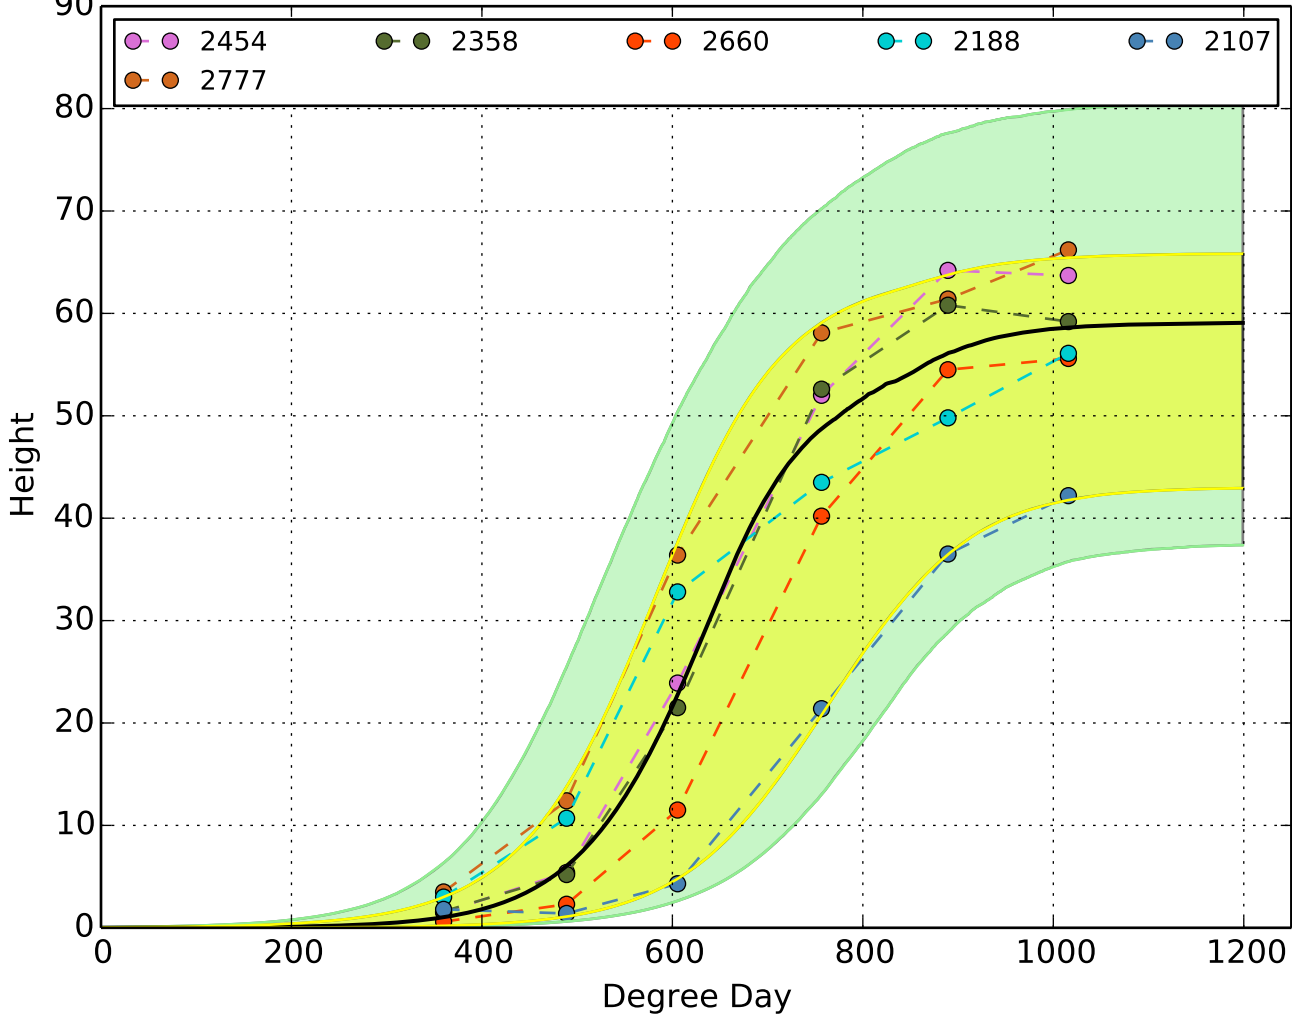

HeightModel3\_v1\_ResErrModel,Treat= UN\_2011,Line 256 (#Inv=6);95CI GrowthCurves

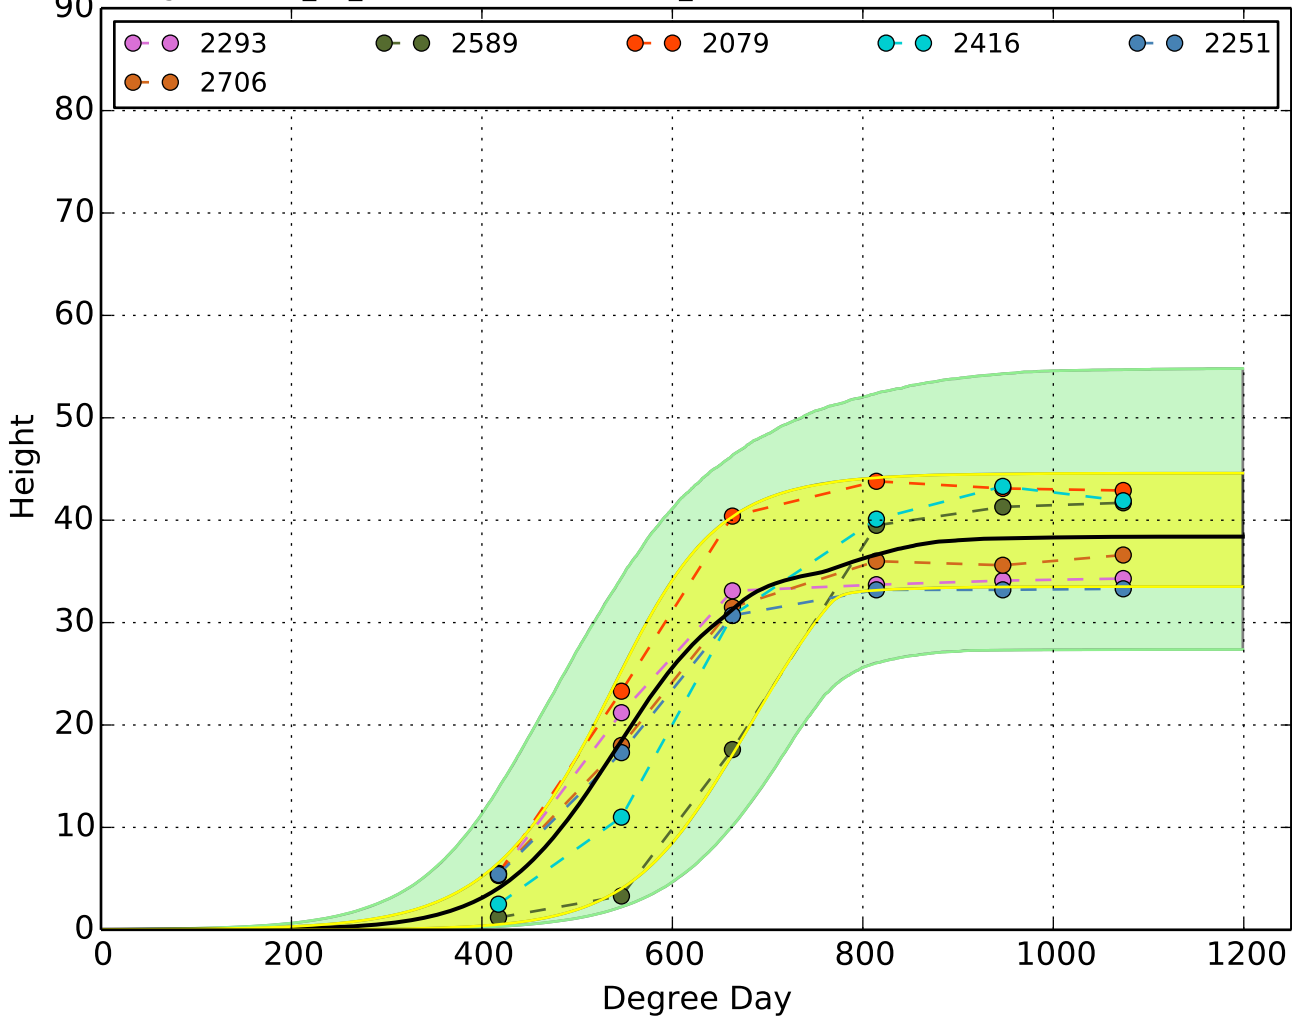

HeightModel3\_v1\_ResErrModel,Treat= UN\_2011,Line 259 (#Inv=6);95CI GrowthCurves

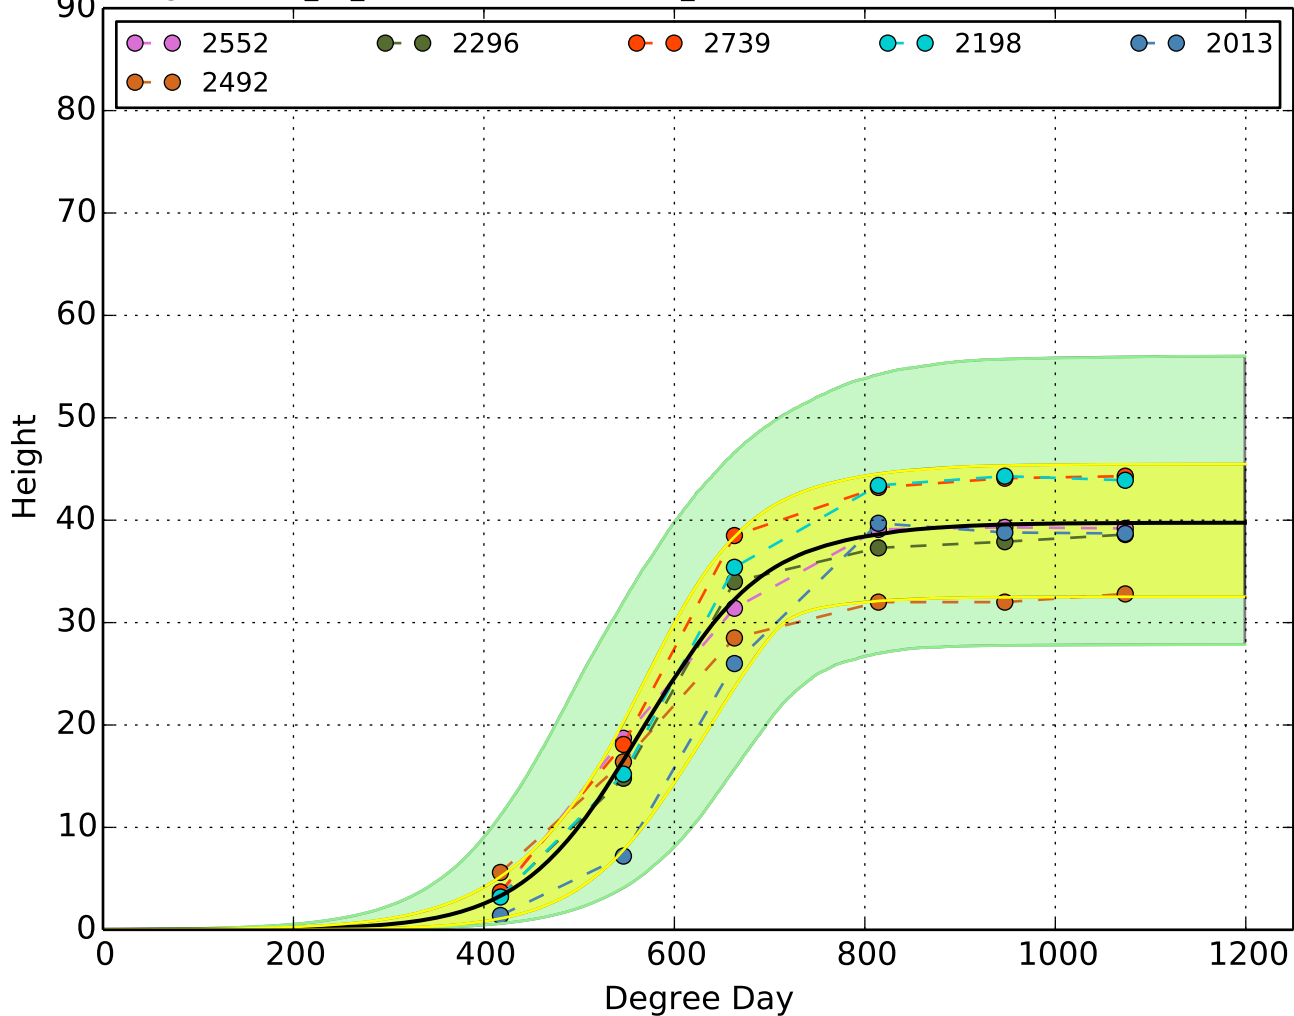



HeightModel3\_v1\_ResErrModel,Treat= UN\_2011,Line 264 (#Inv=5);95CI GrowthCurves

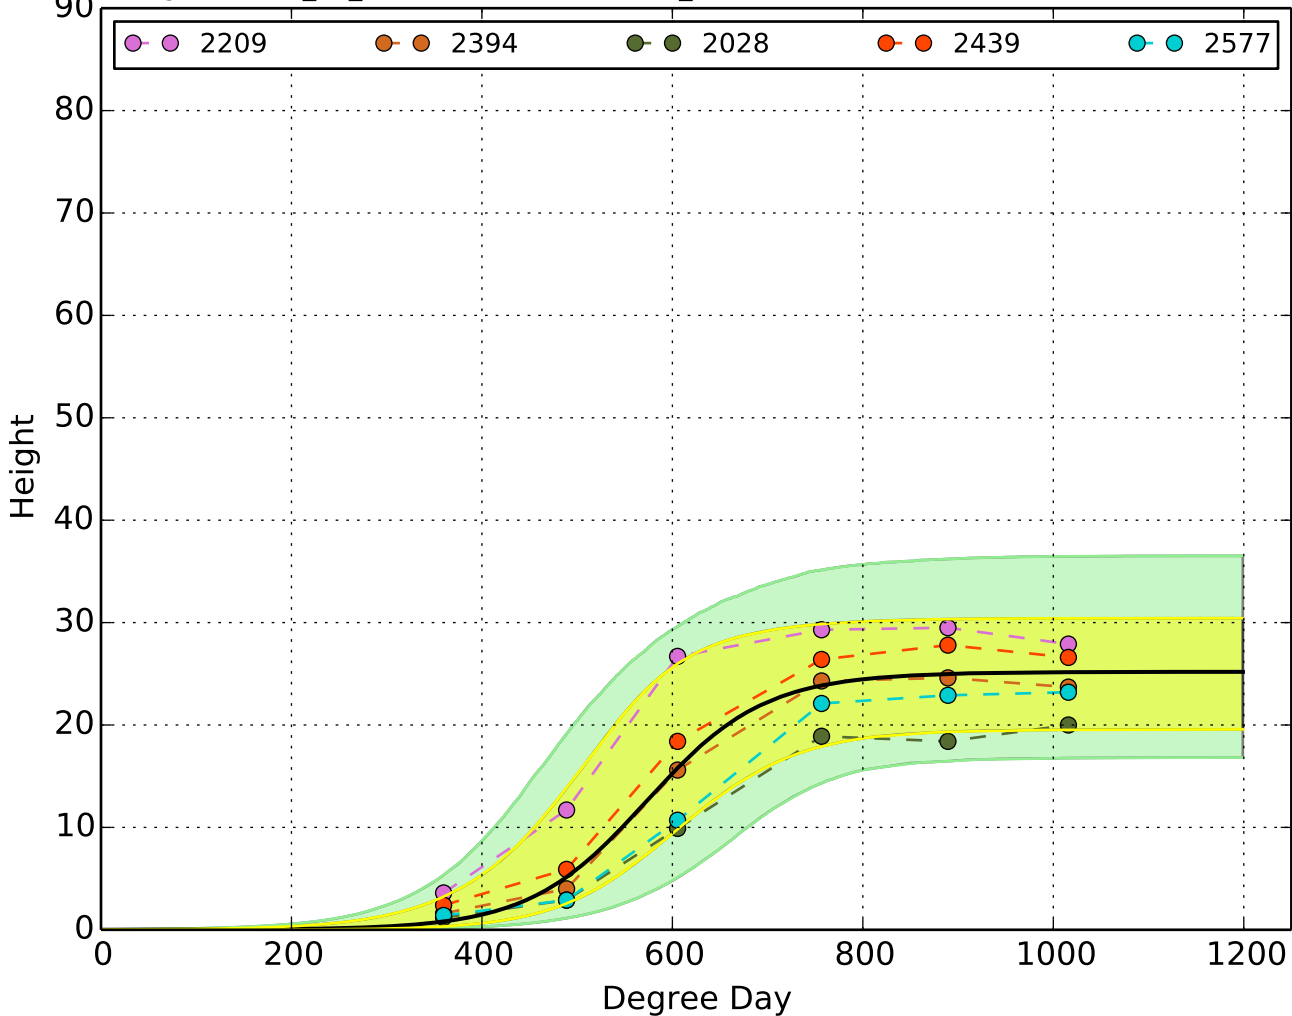

HeightModel3\_v1\_ResErrModel,Treat= UN\_2011,Line 265 (#Inv=3);95CI GrowthCurves

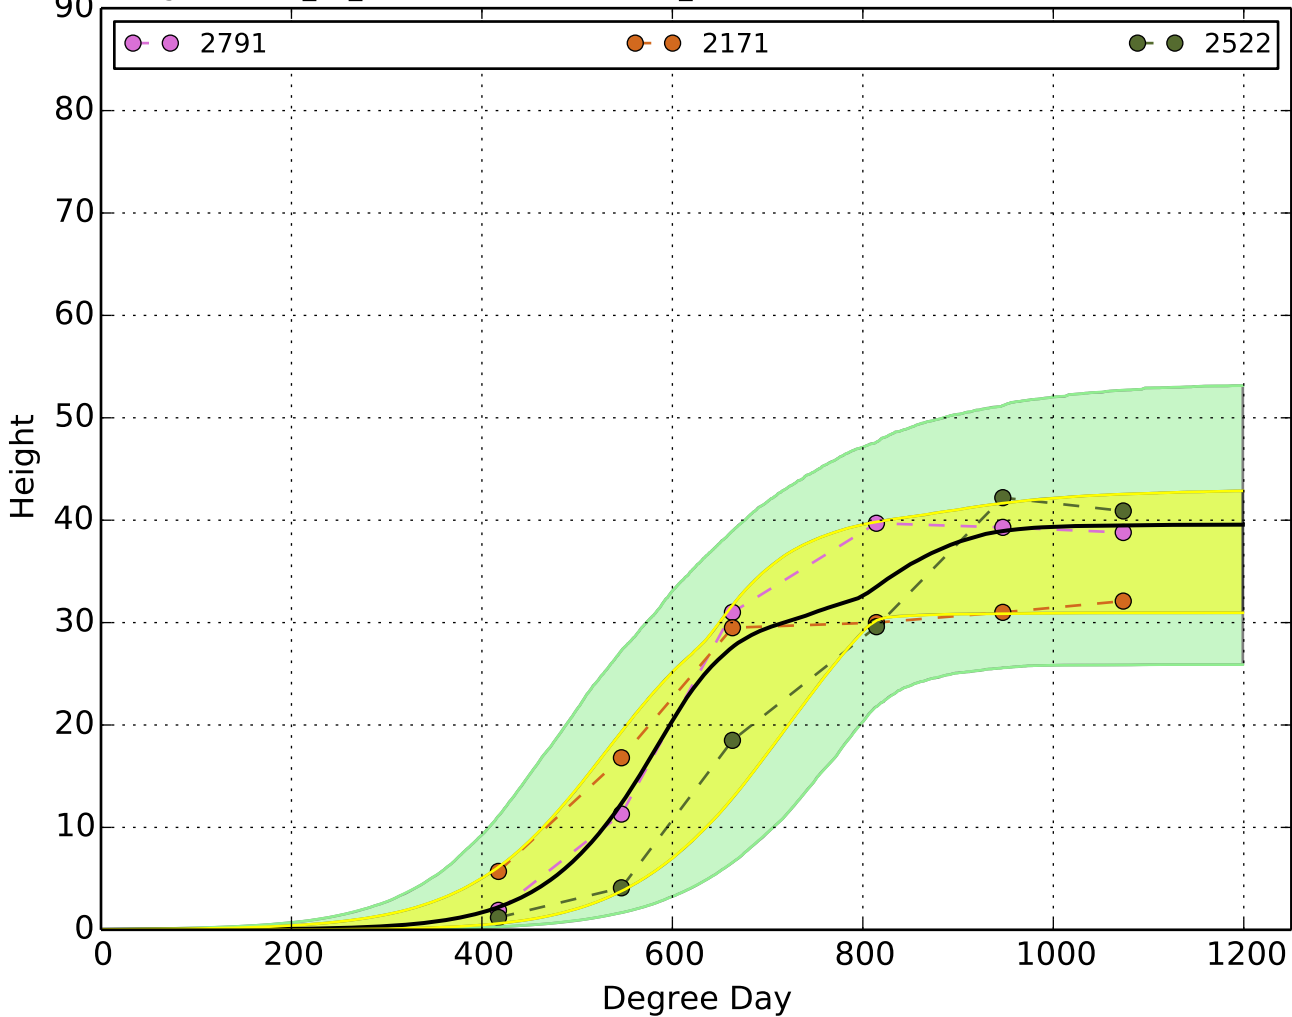

HeightModel3\_v1\_ResErrModel,Treat= UN\_2011,Line 267 (#Inv=5);95CI GrowthCurves

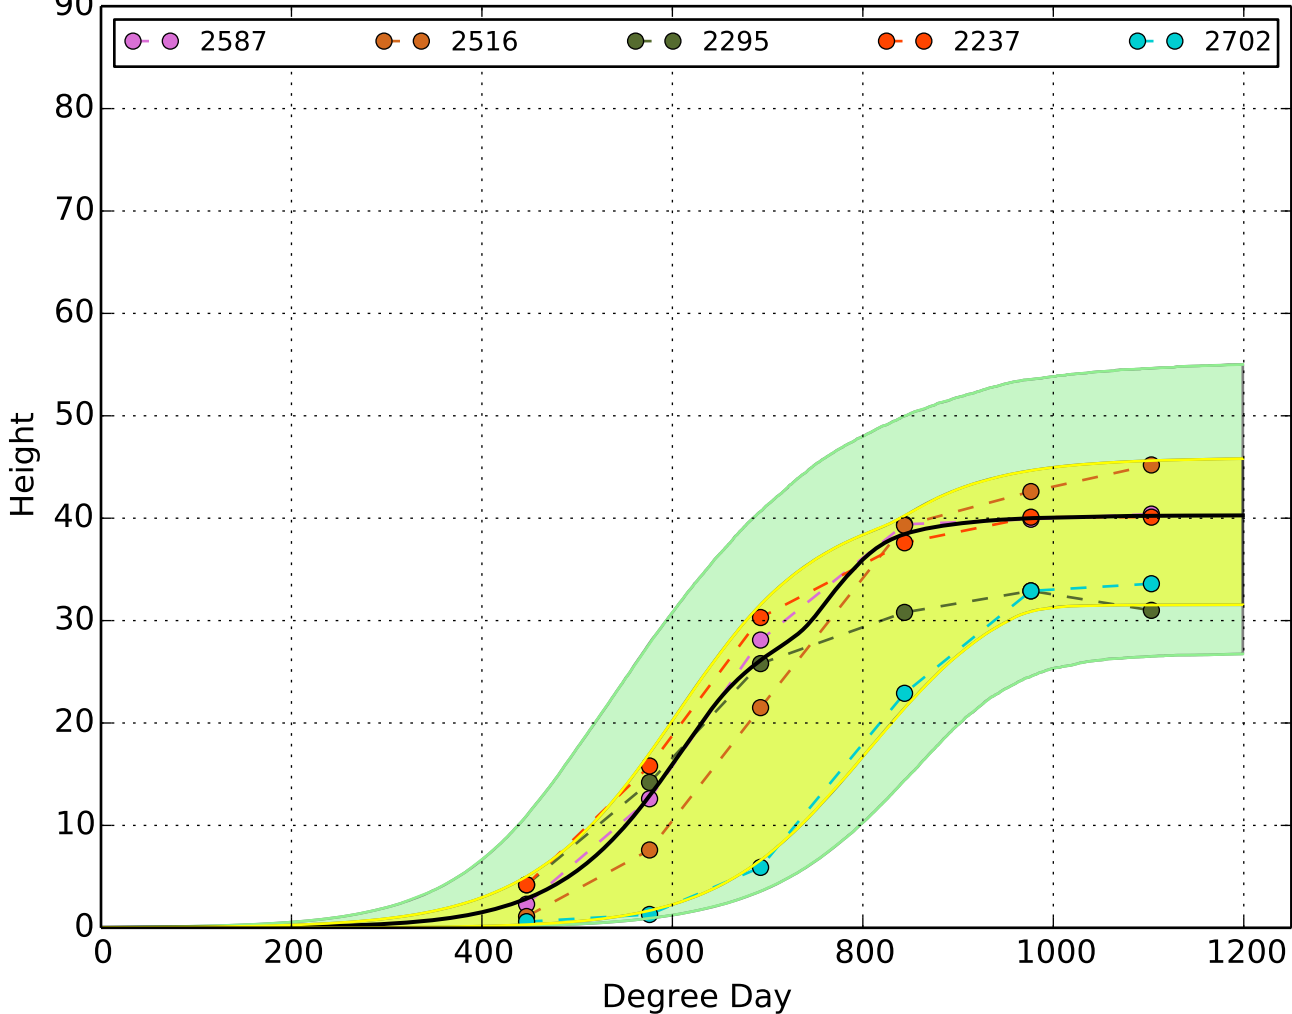

HeightModel3\_v1\_ResErrModel,Treat= UN\_2011,Line 268 (#Inv=6);95CI GrowthCurves

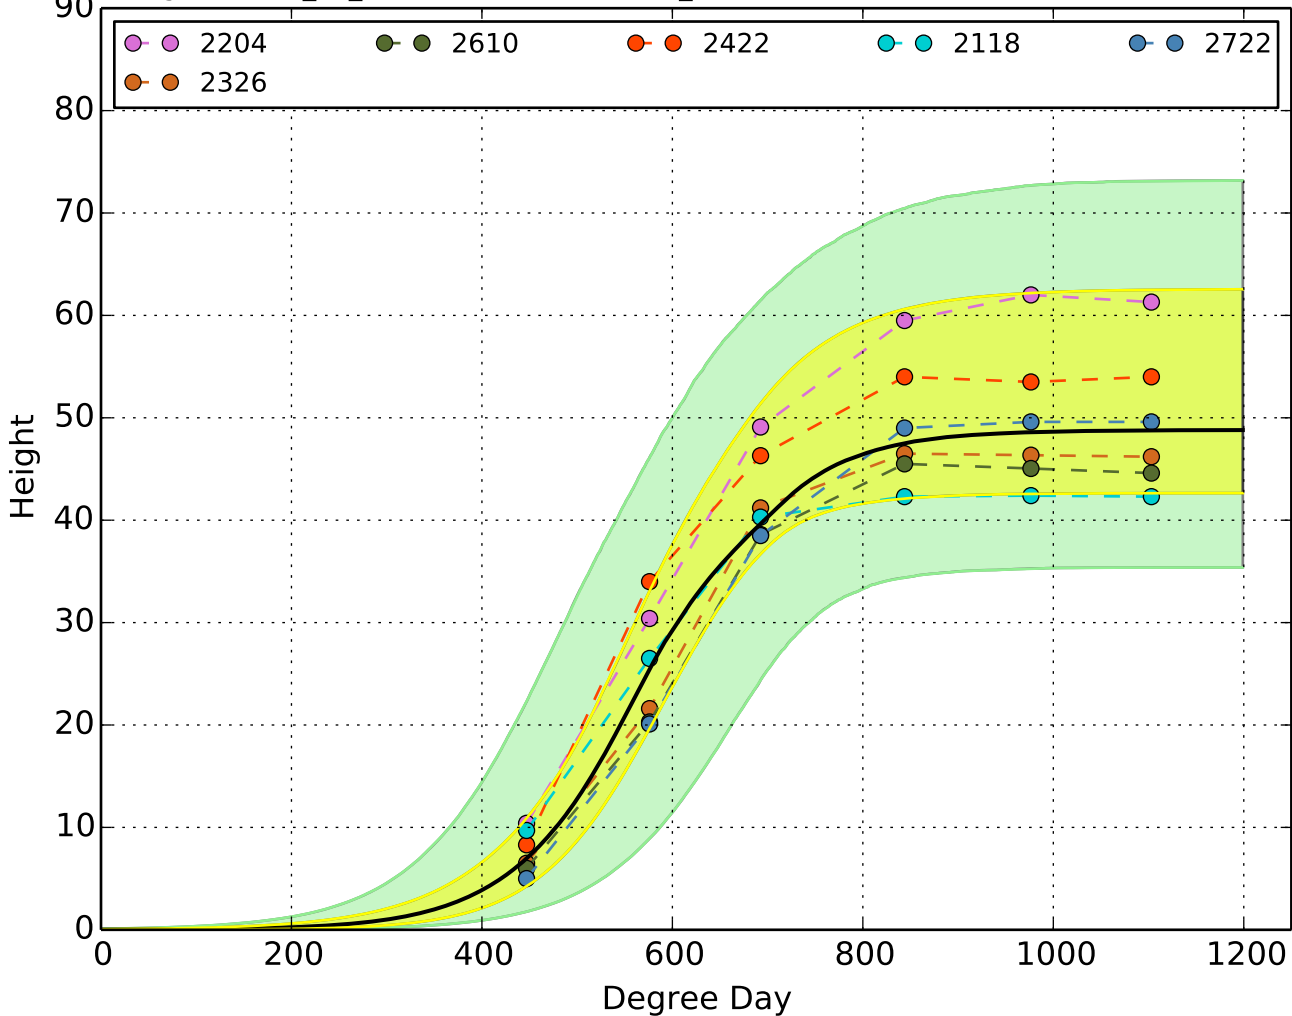

HeightModel3\_v1\_ResErrModel,Treat= UN\_2011,Line 270 (#Inv=6);95CI GrowthCurves

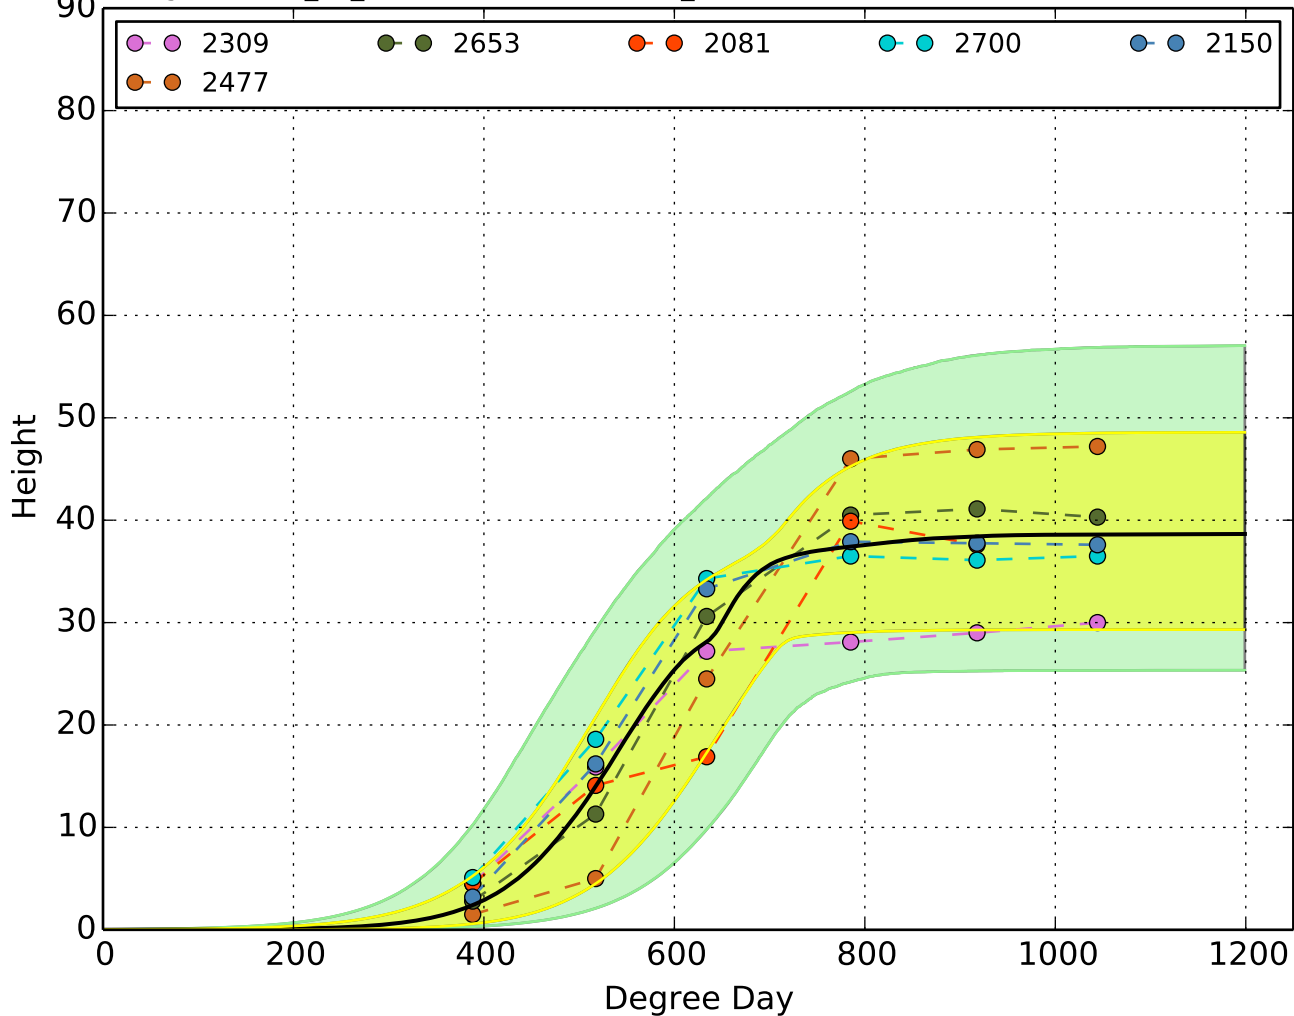

HeightModel3\_v1\_ResErrModel,Treat= UN\_2011,Line 277 (#Inv=5);95CI GrowthCurves

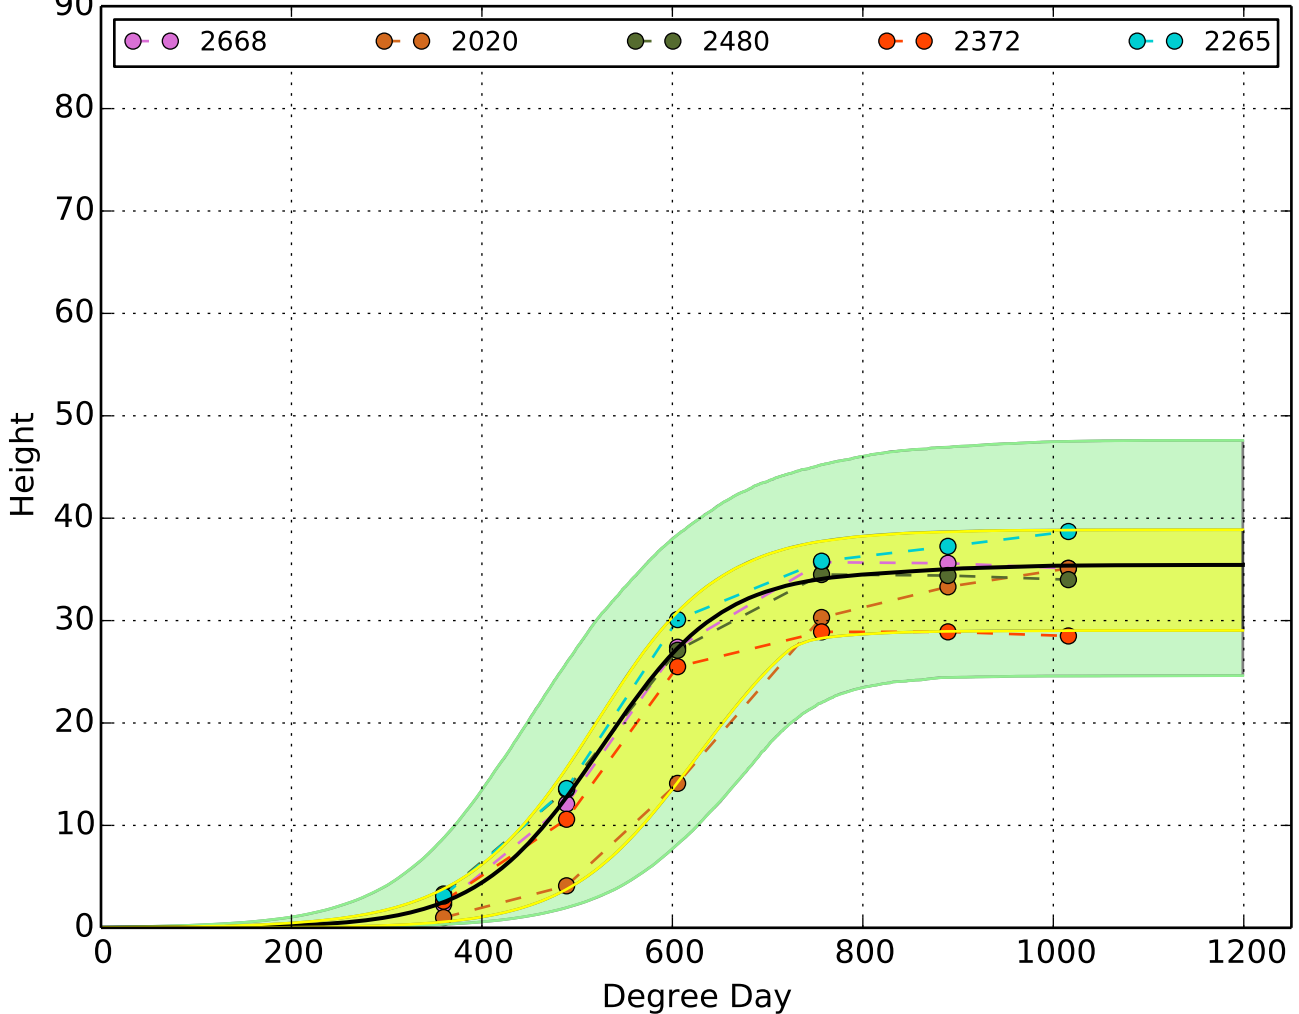

HeightModel3\_v1\_ResErrModel,Treat= UN\_2011,Line 281 (#Inv=5);95CI GrowthCurves

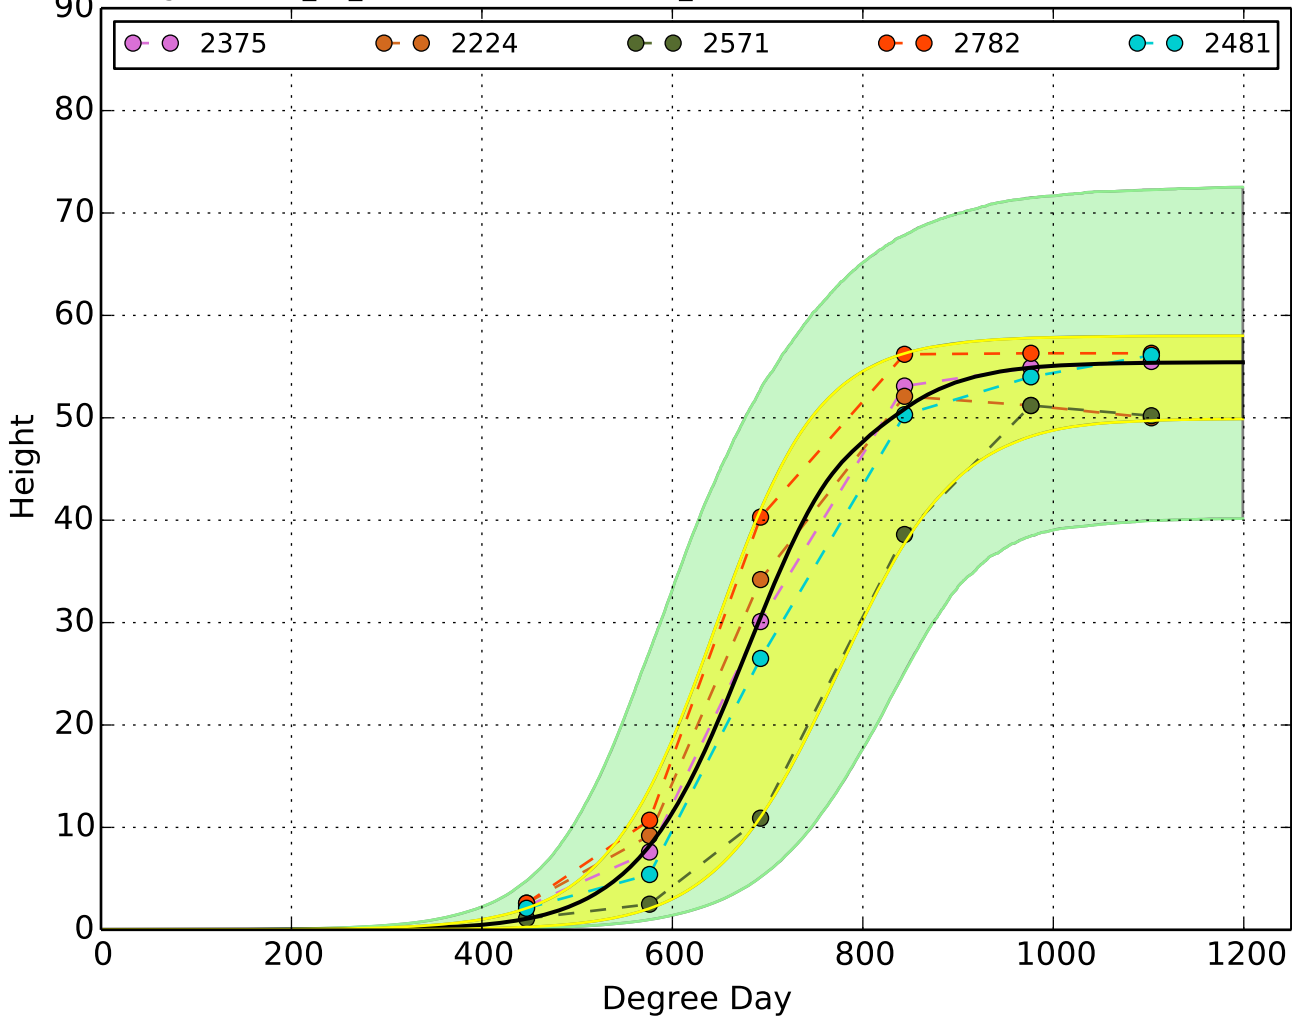

HeightModel3\_v1\_ResErrModel,Treat= UN\_2011,Line 282 (#Inv=5);95CI GrowthCurves

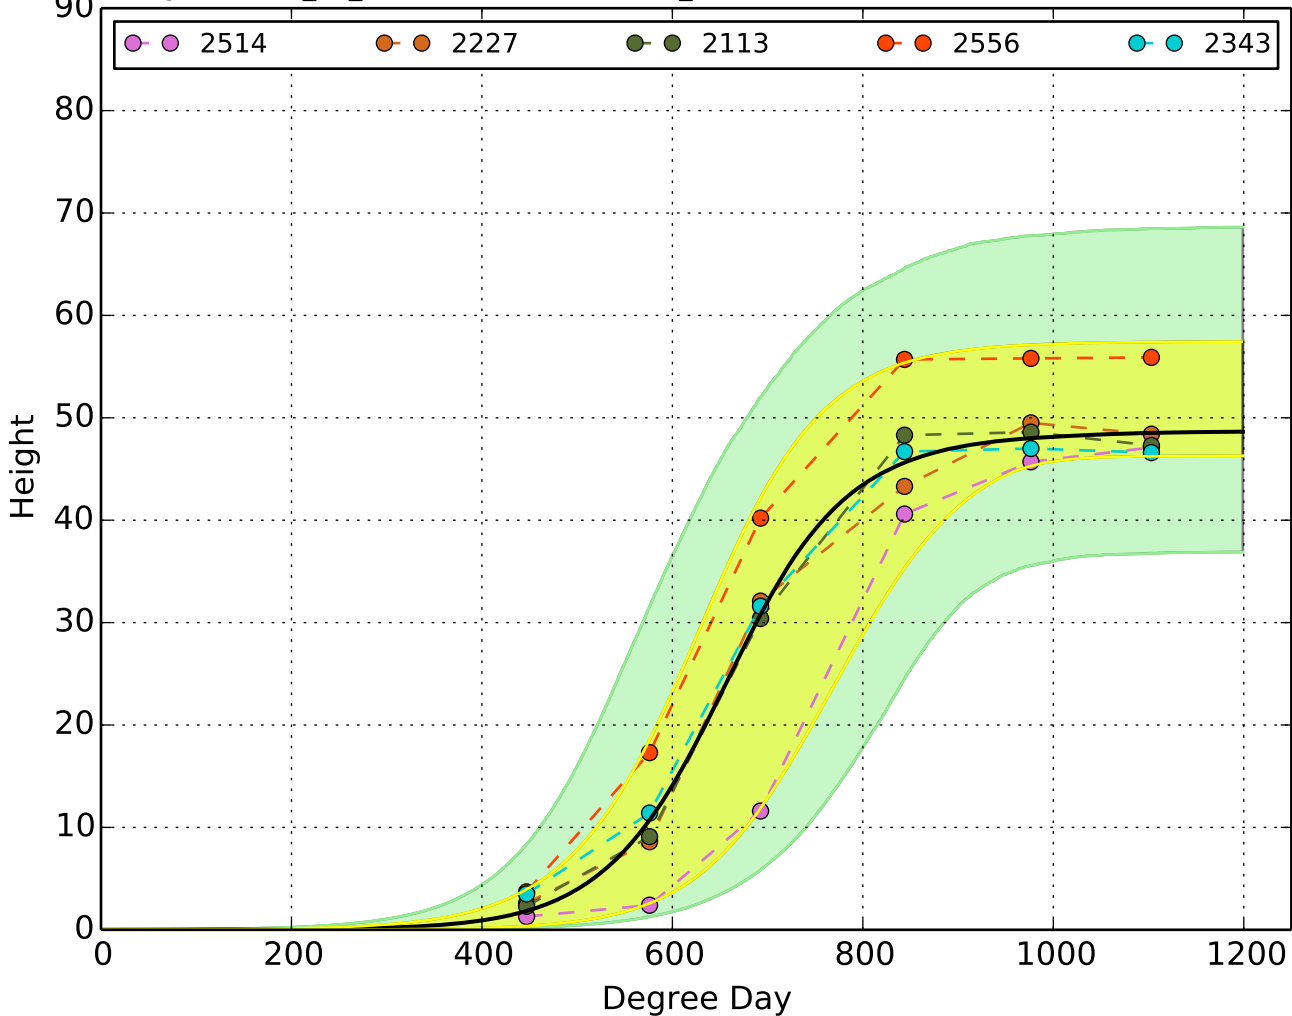



HeightModel3\_v1\_ResErrModel,Treat= UN\_2011,Line 284 (#Inv=6);95CI GrowthCurves

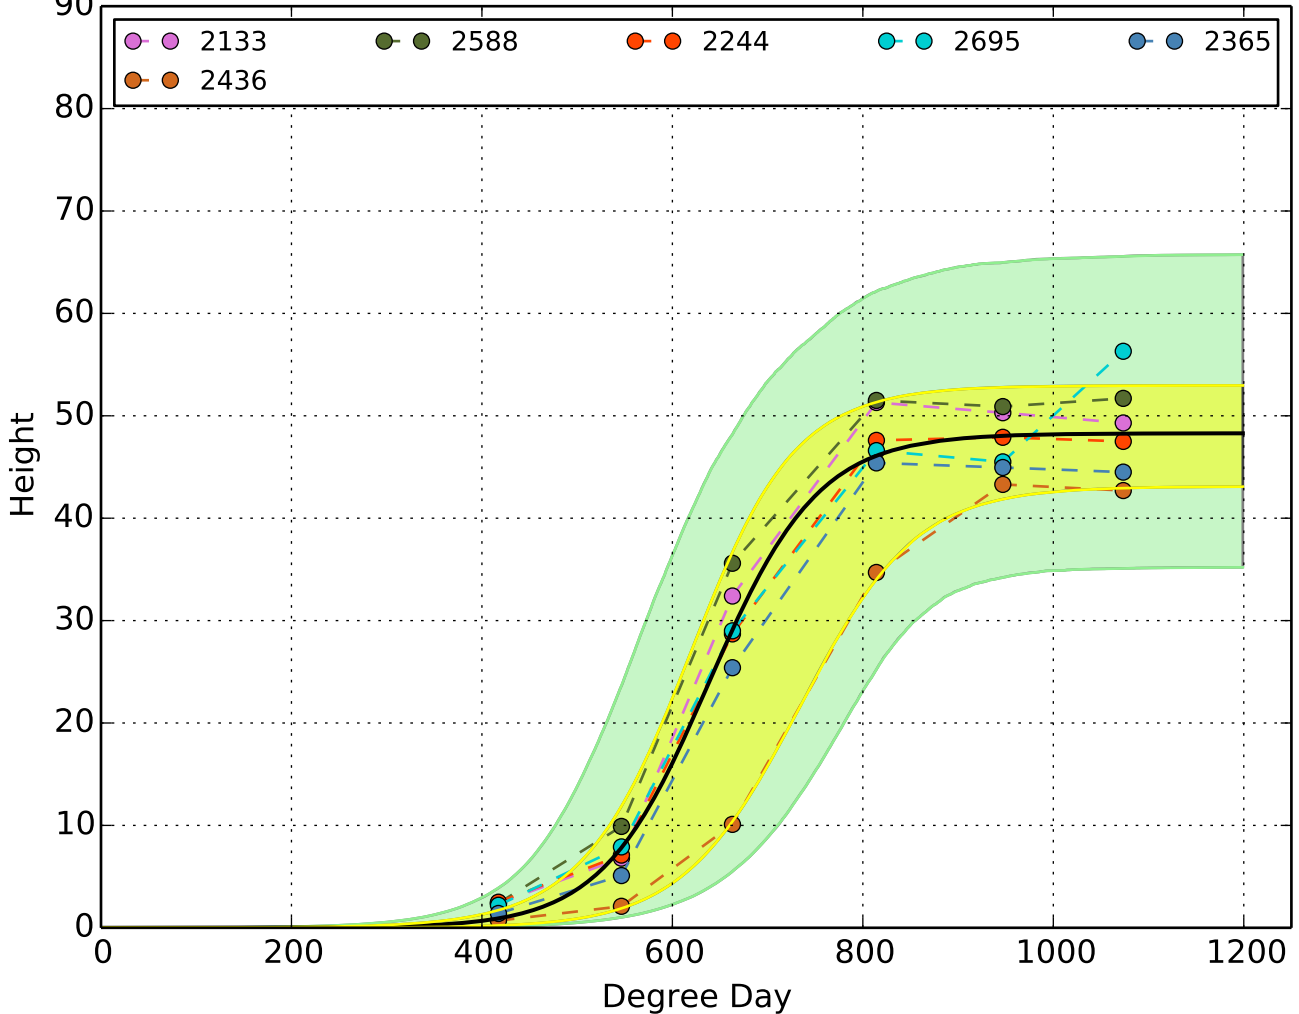

HeightModel3\_v1\_ResErrModel,Treat= UN\_2011,Line 285 (#Inv=6);95CI GrowthCurves

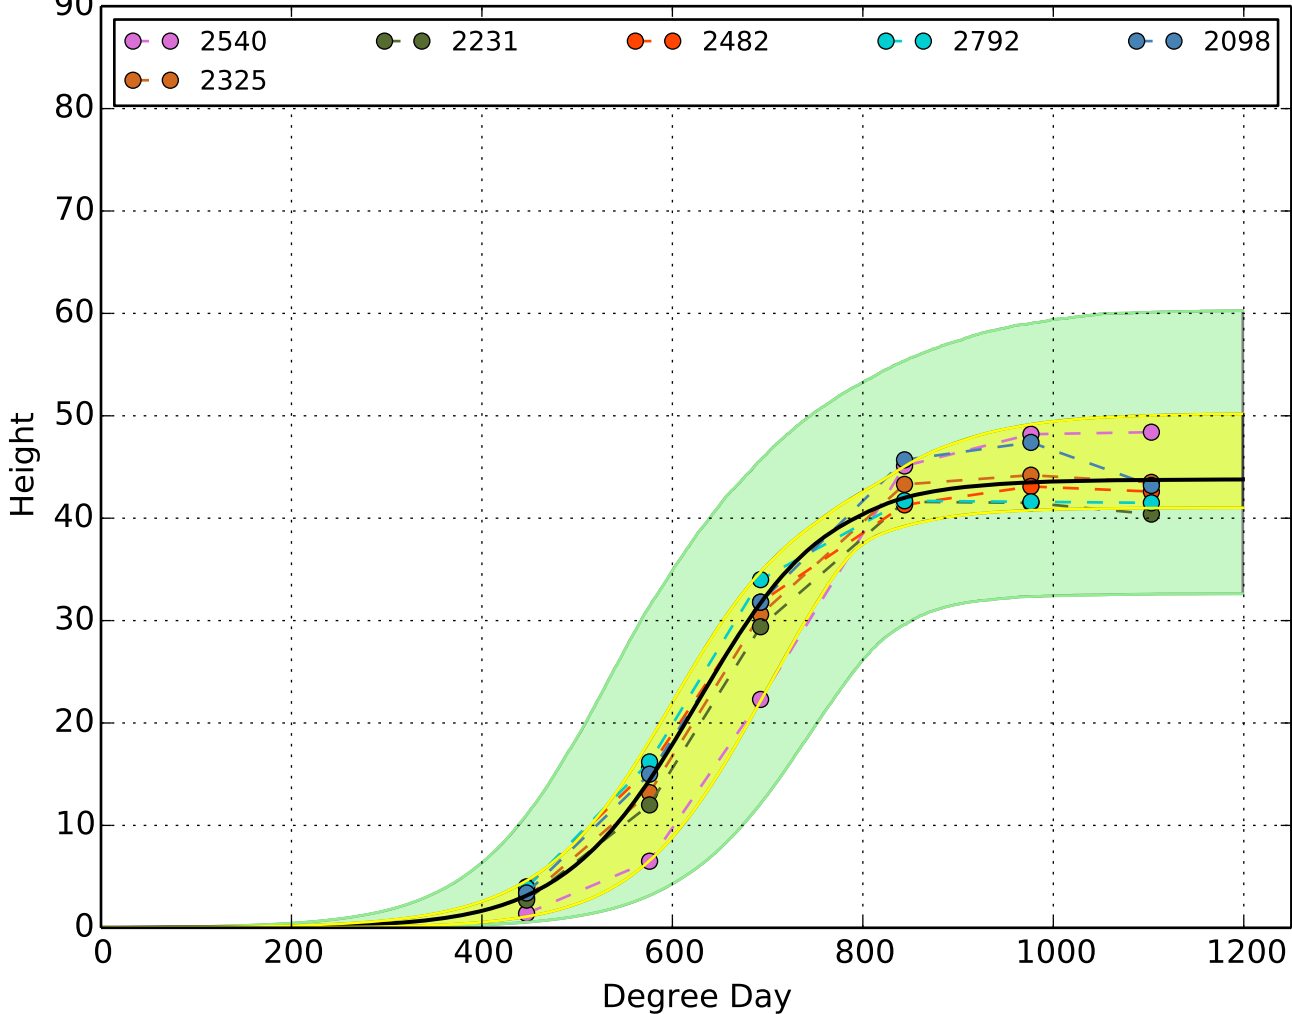

HeightModel3\_v1\_ResErrModel,Treat= UN\_2011,Line 288 (#Inv=6);95CI GrowthCurves

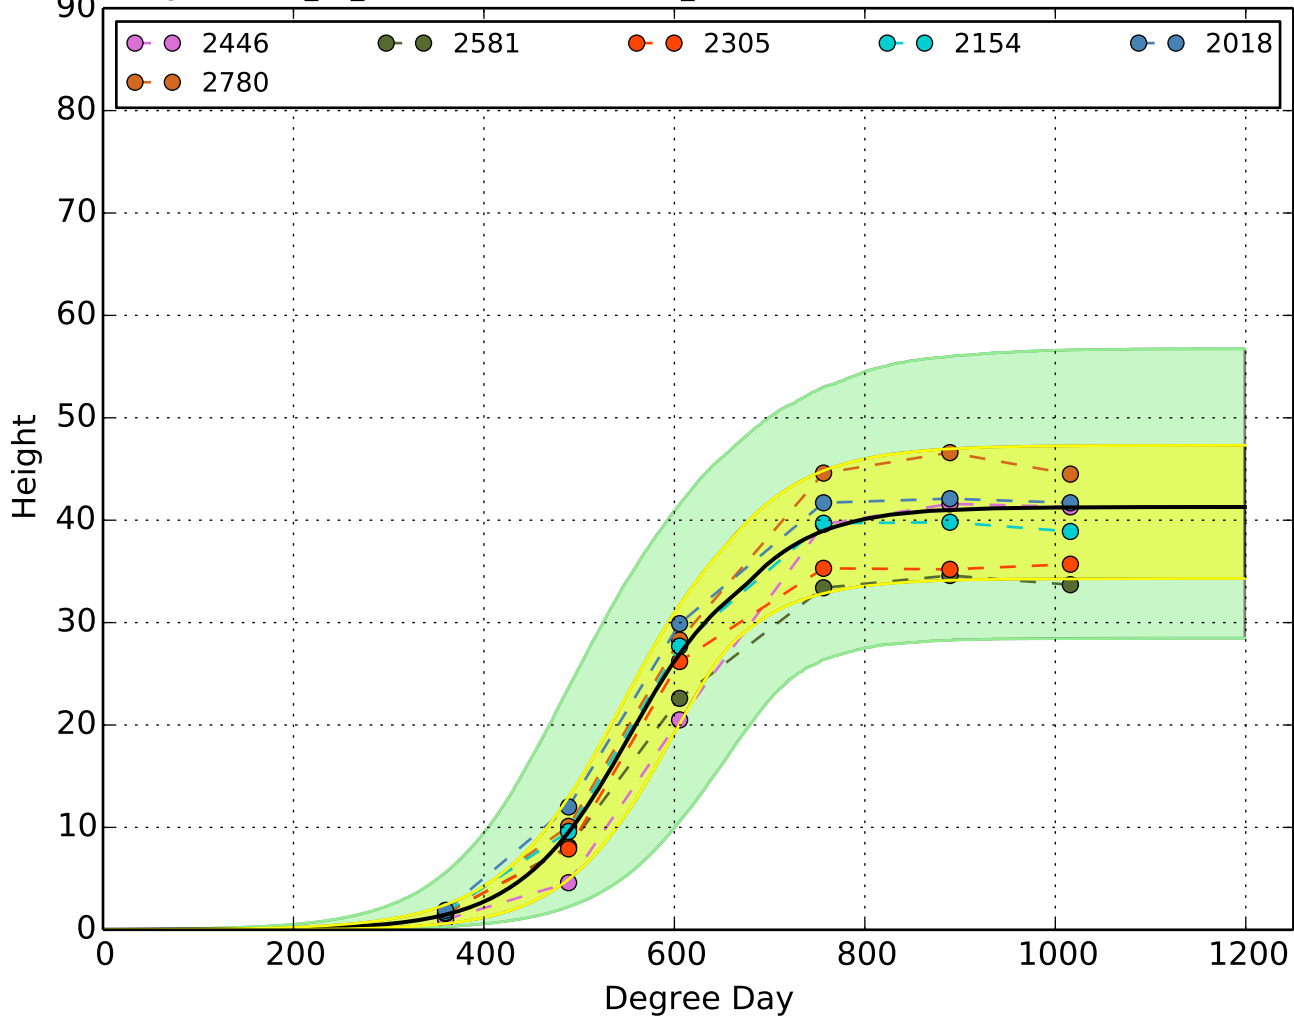

HeightModel3\_v1\_ResErrModel,Treat= UN\_2011,Line 289 (#Inv=6);95CI GrowthCurves

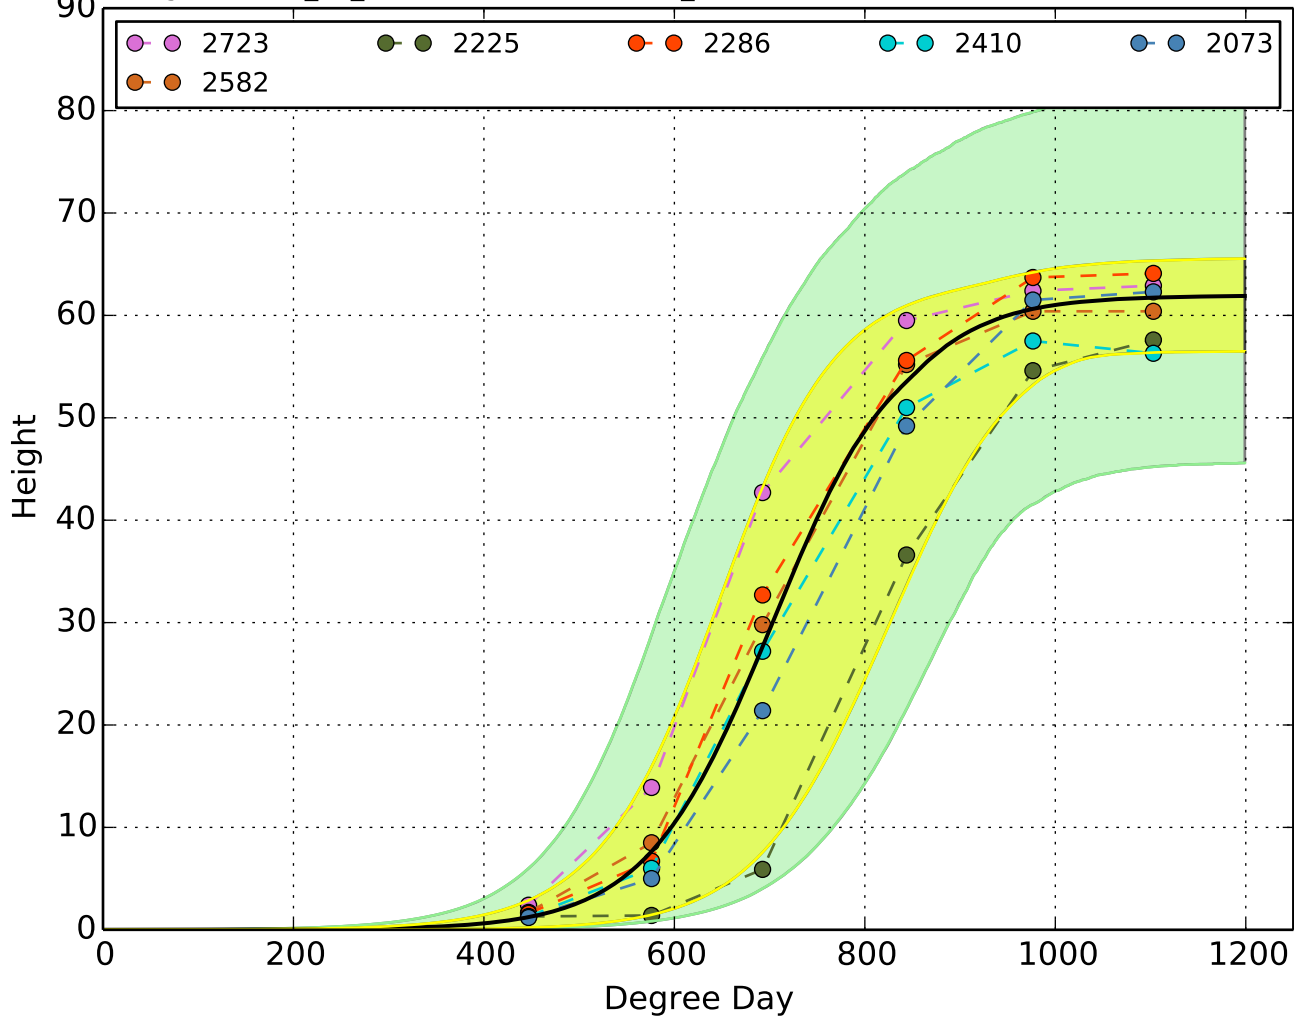

HeightModel3\_v1\_ResErrModel,Treat= UN\_2011,Line 290 (#Inv=6);95CI GrowthCurves

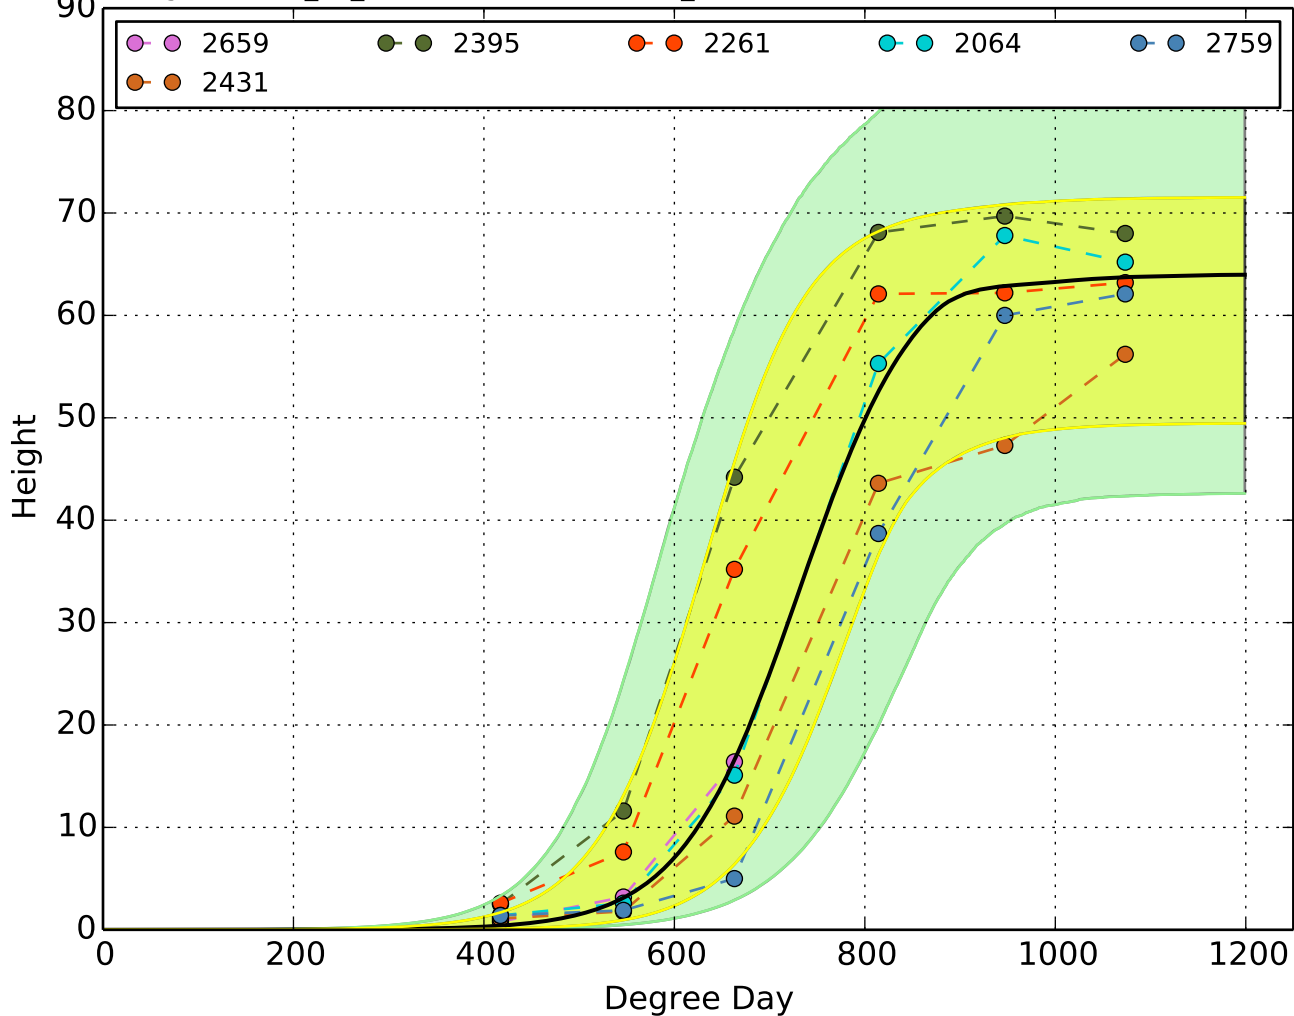

HeightModel3\_v1\_ResErrModel,Treat= UN\_2011,Line 300 (#Inv=5);95CI GrowthCurves

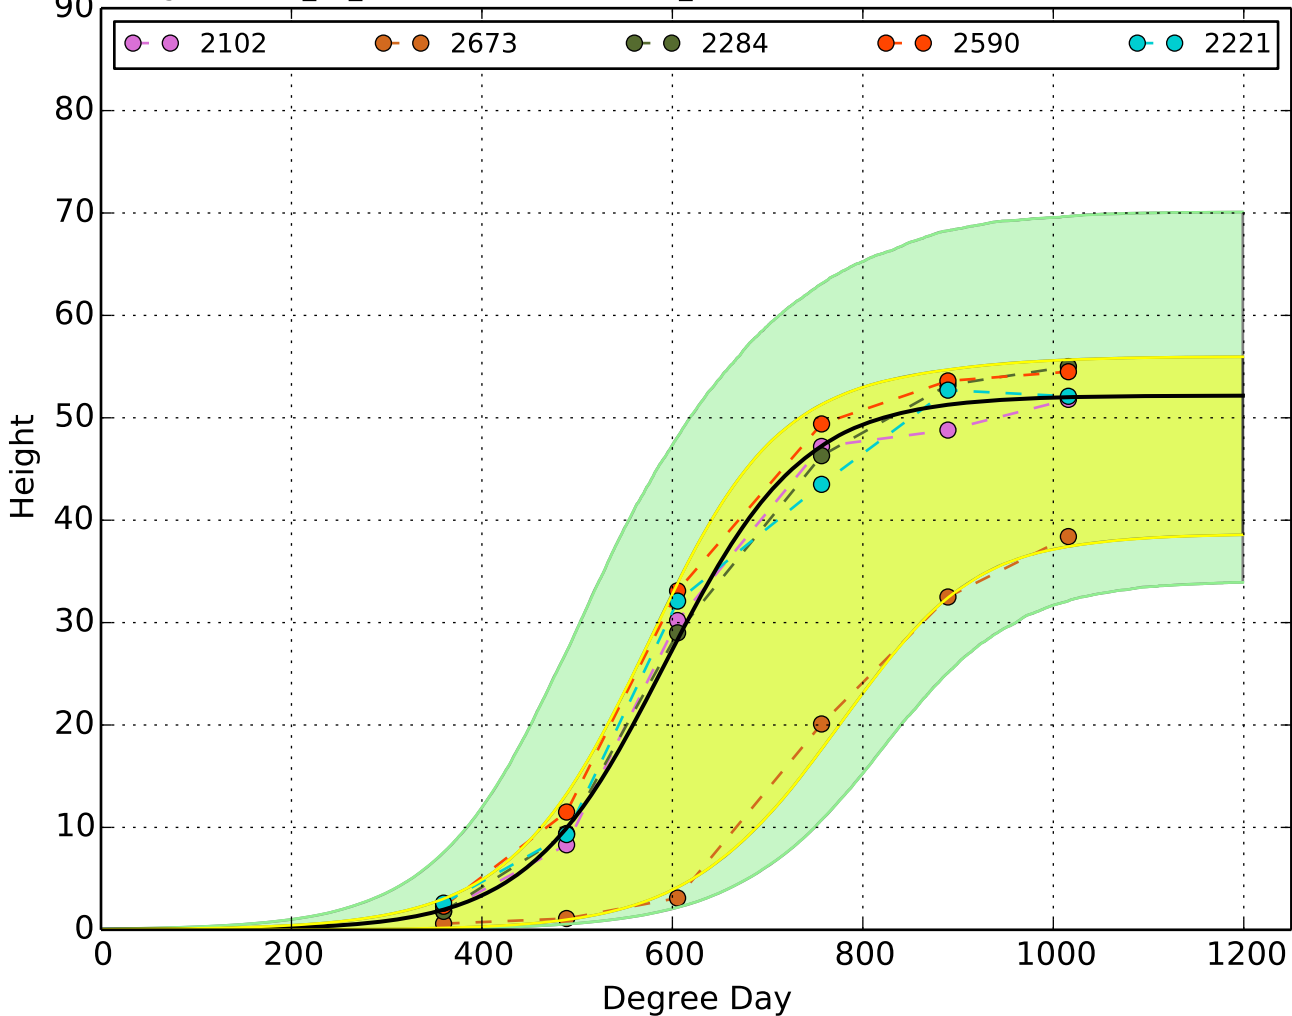

HeightModel3\_v1\_ResErrModel,Treat= UN\_2011,Line 301 (#Inv=5);95CI GrowthCurves

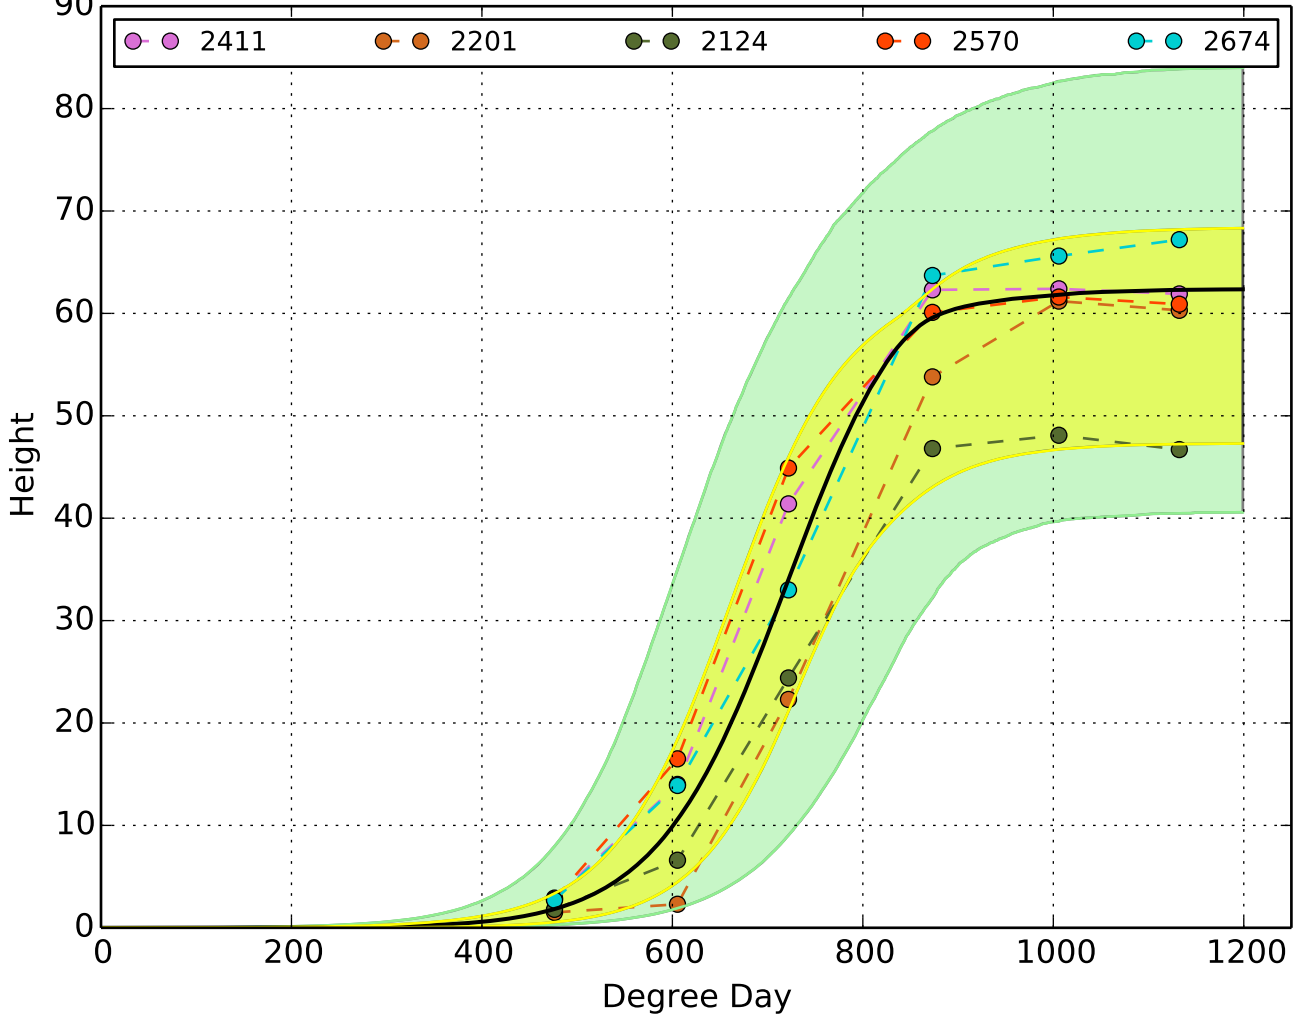

HeightModel3\_v1\_ResErrModel,Treat= UN\_2011,Line 303 (#Inv=5);95CI GrowthCurves

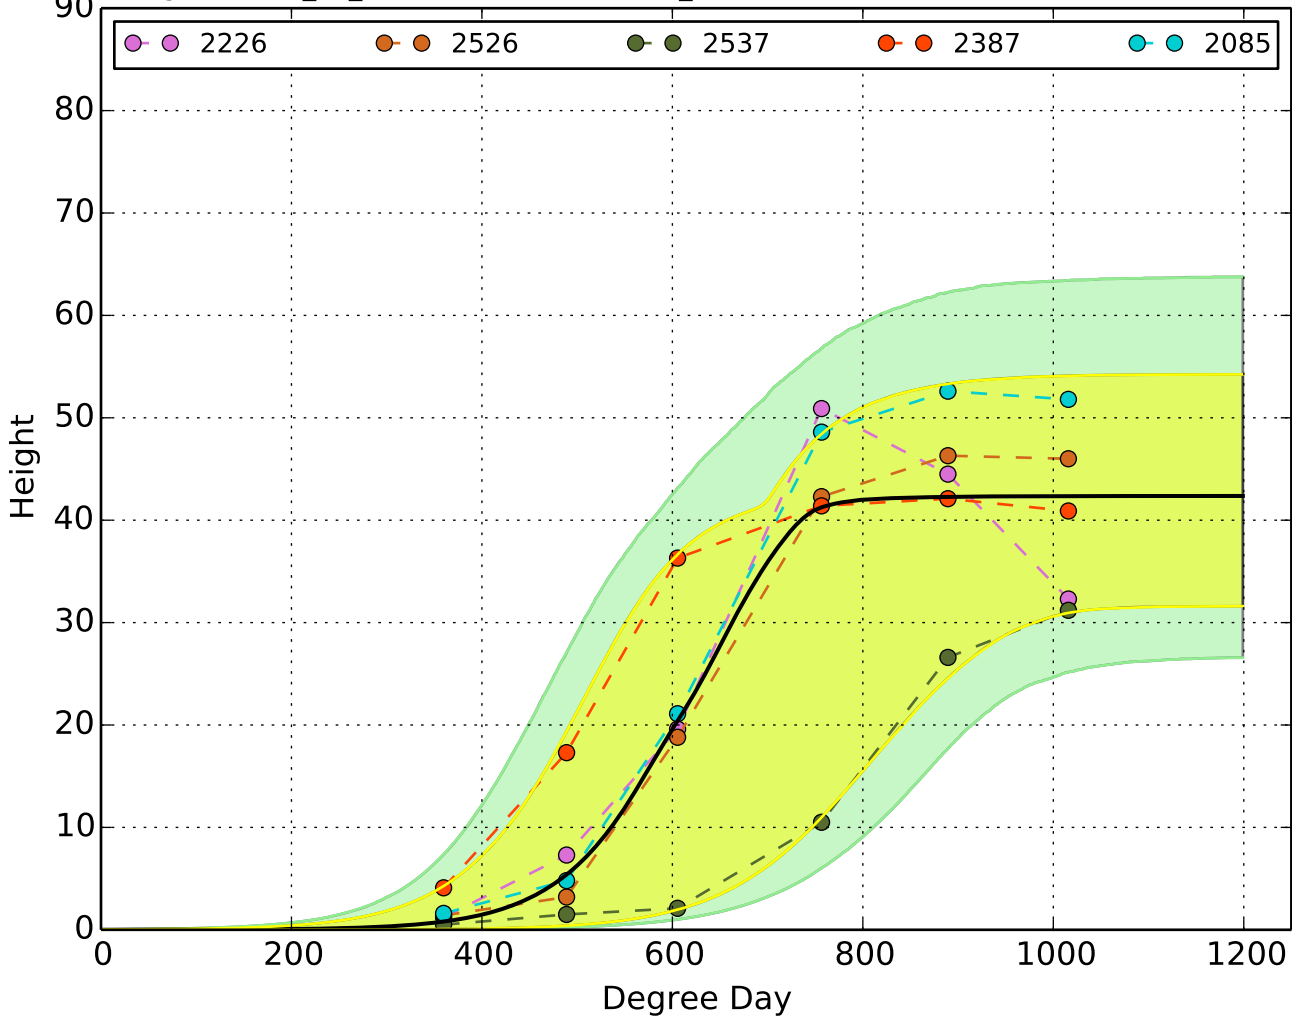



HeightModel3\_v1\_ResErrModel,Treat= UN\_2011,Line 308 (#Inv=5);95CI GrowthCurves

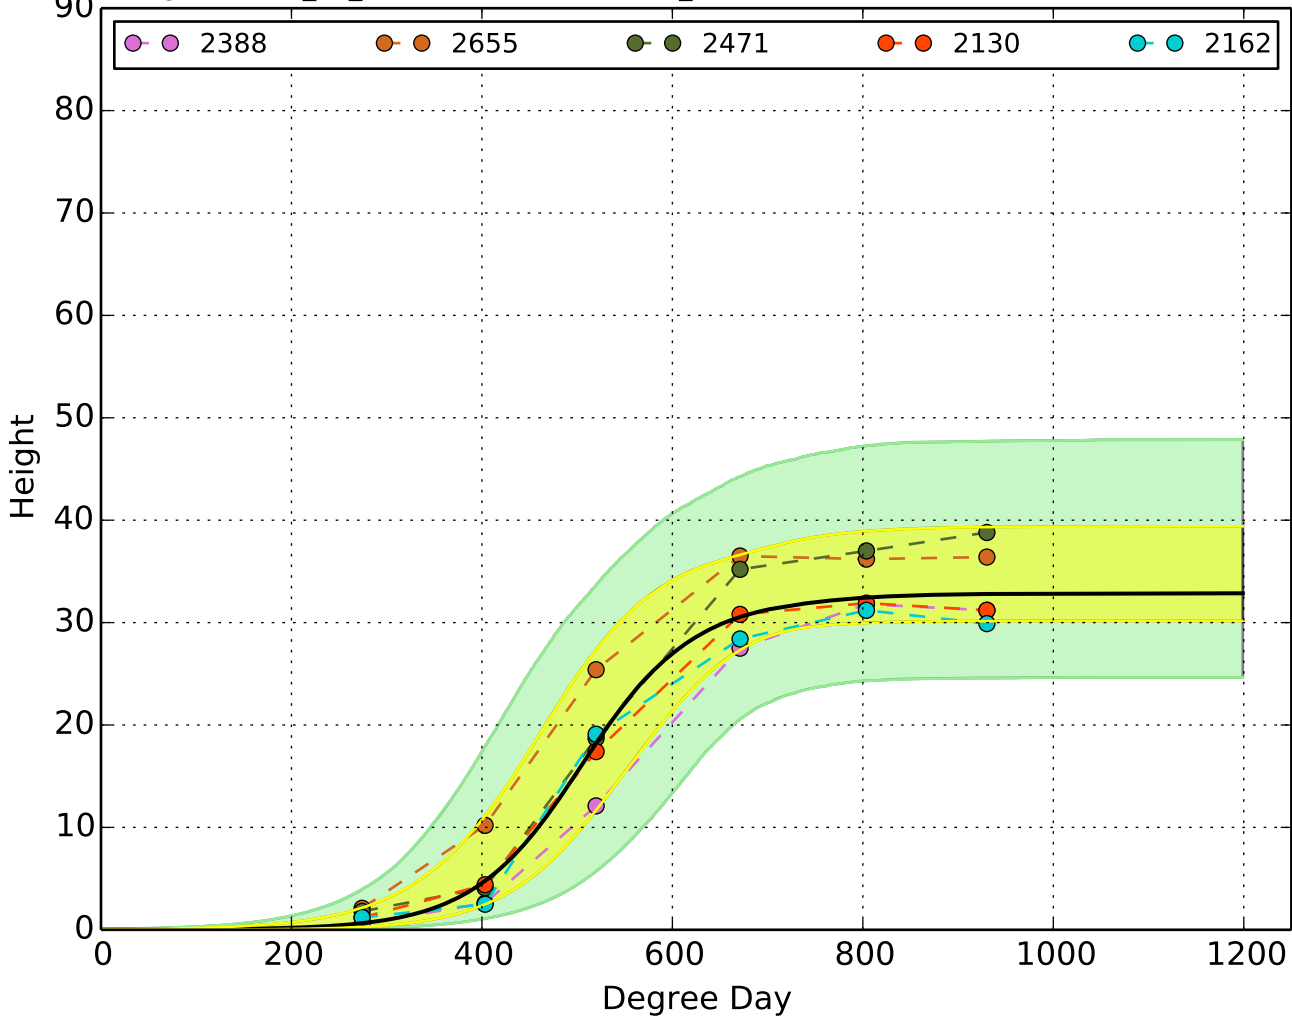

HeightModel3\_v1\_ResErrModel,Treat= UN\_2011,Line 311 (#Inv=5);95CI GrowthCurves

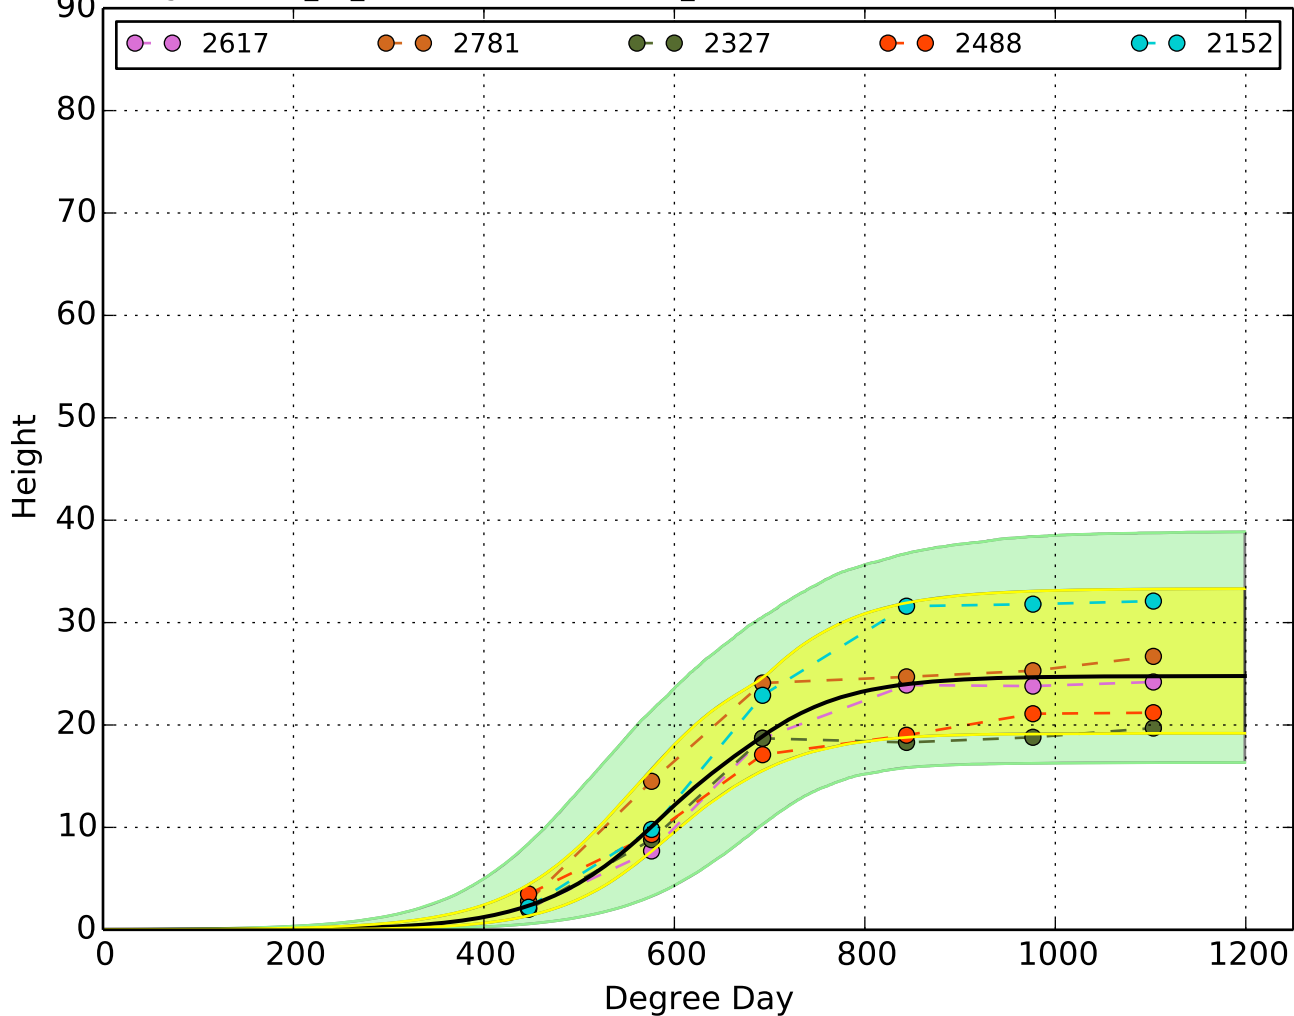

HeightModel3\_v1\_ResErrModel,Treat= UN\_2011,Line 318 (#Inv=6);95CI GrowthCurves

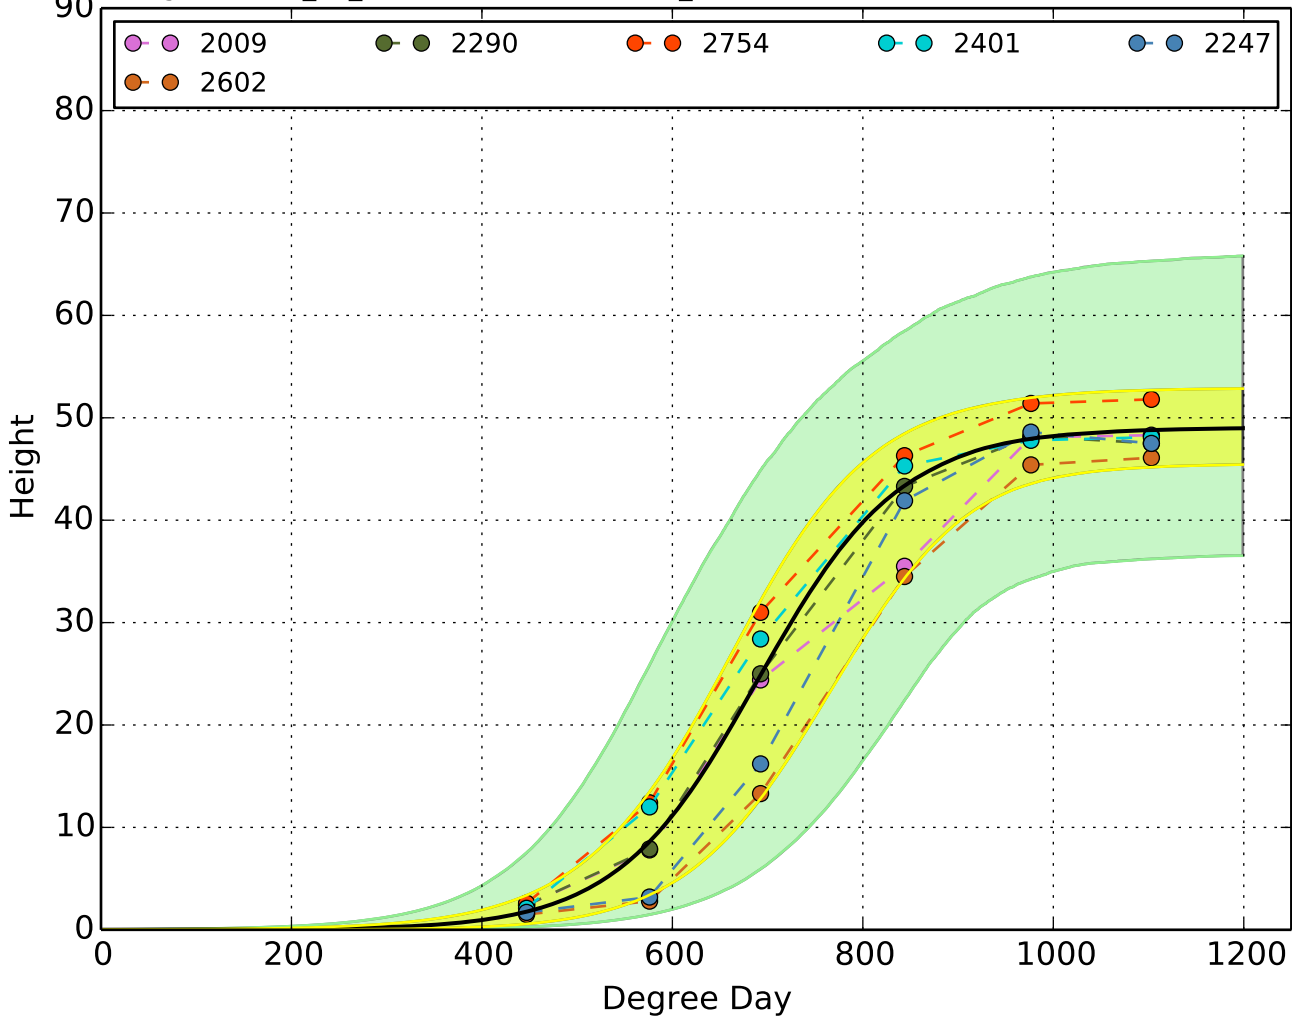

HeightModel3\_v1\_ResErrModel,Treat= UN\_2011,Line 325 (#Inv=5);95CI GrowthCurves

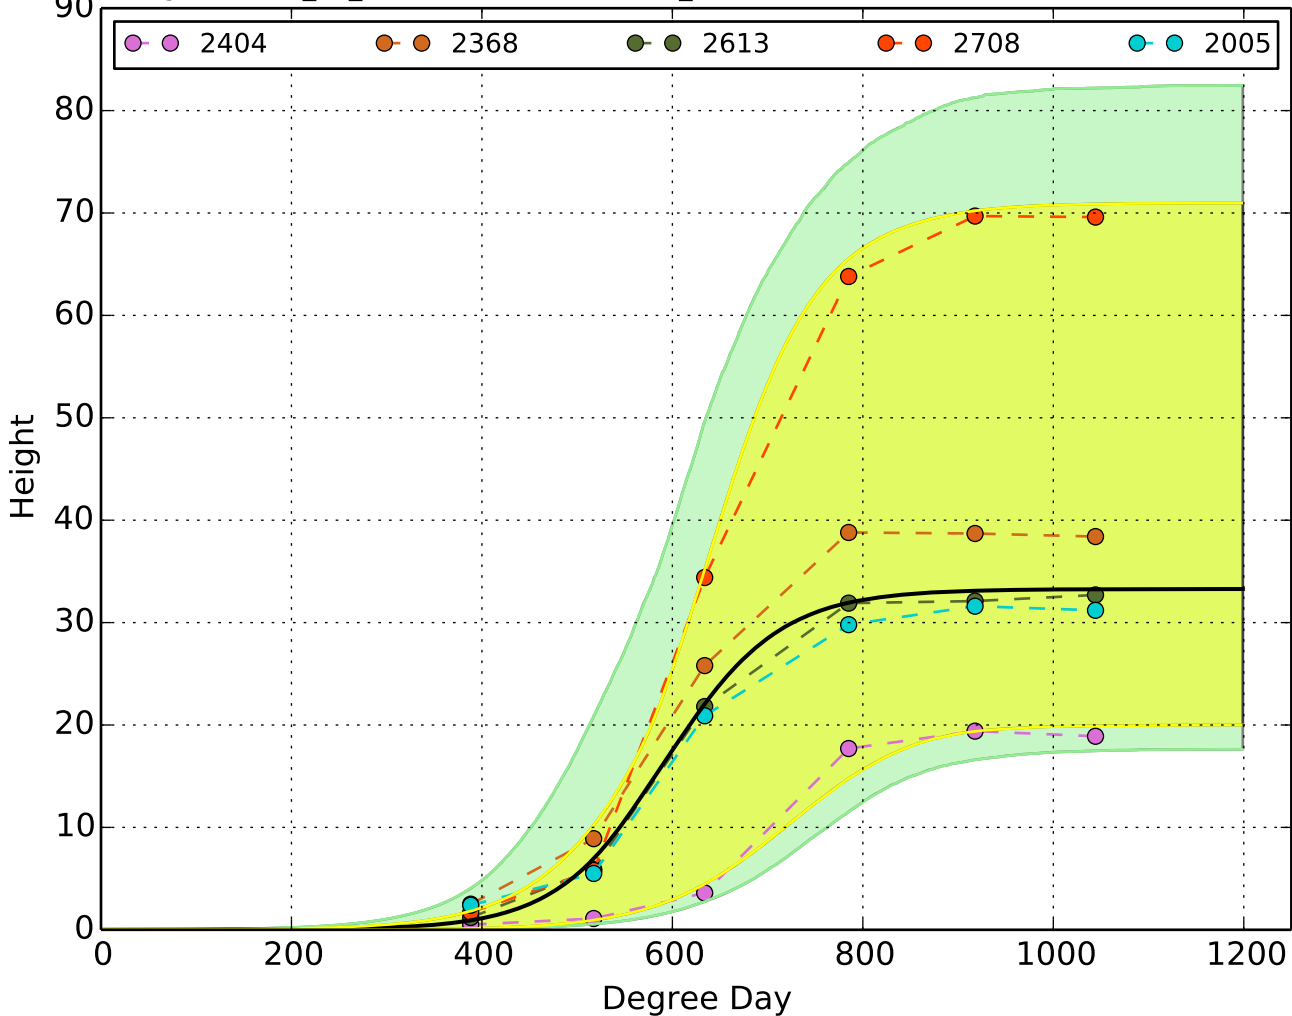

HeightModel3\_v1\_ResErrModel,Treat= UN\_2011,Line 328 (#Inv=4);95CI GrowthCurves

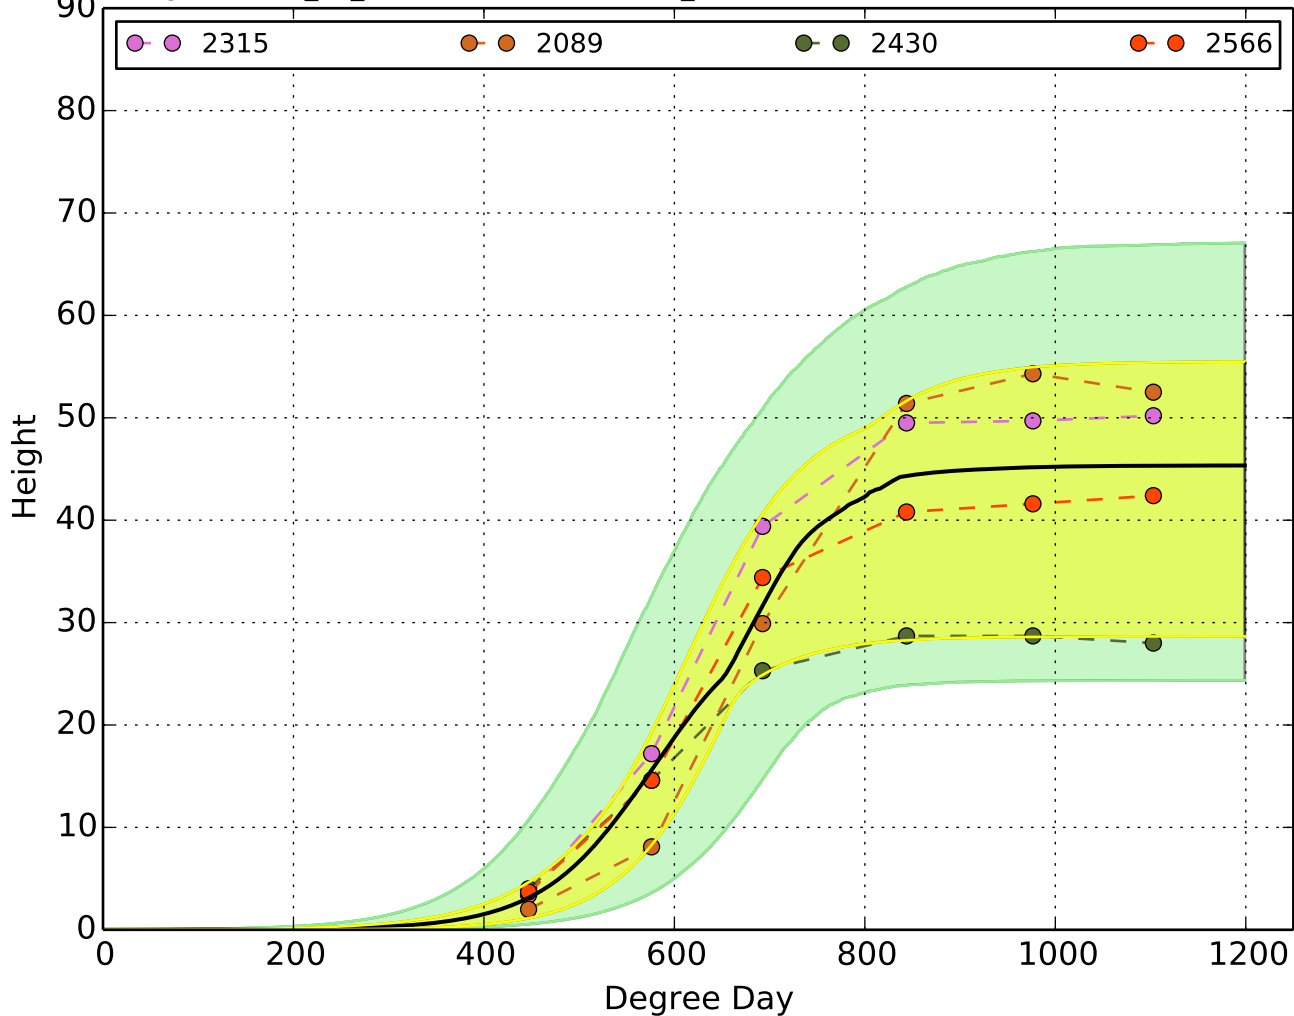

HeightModel3\_v1\_ResErrModel,Treat= UN\_2011,Line 332 (#Inv=6);95CI GrowthCurves

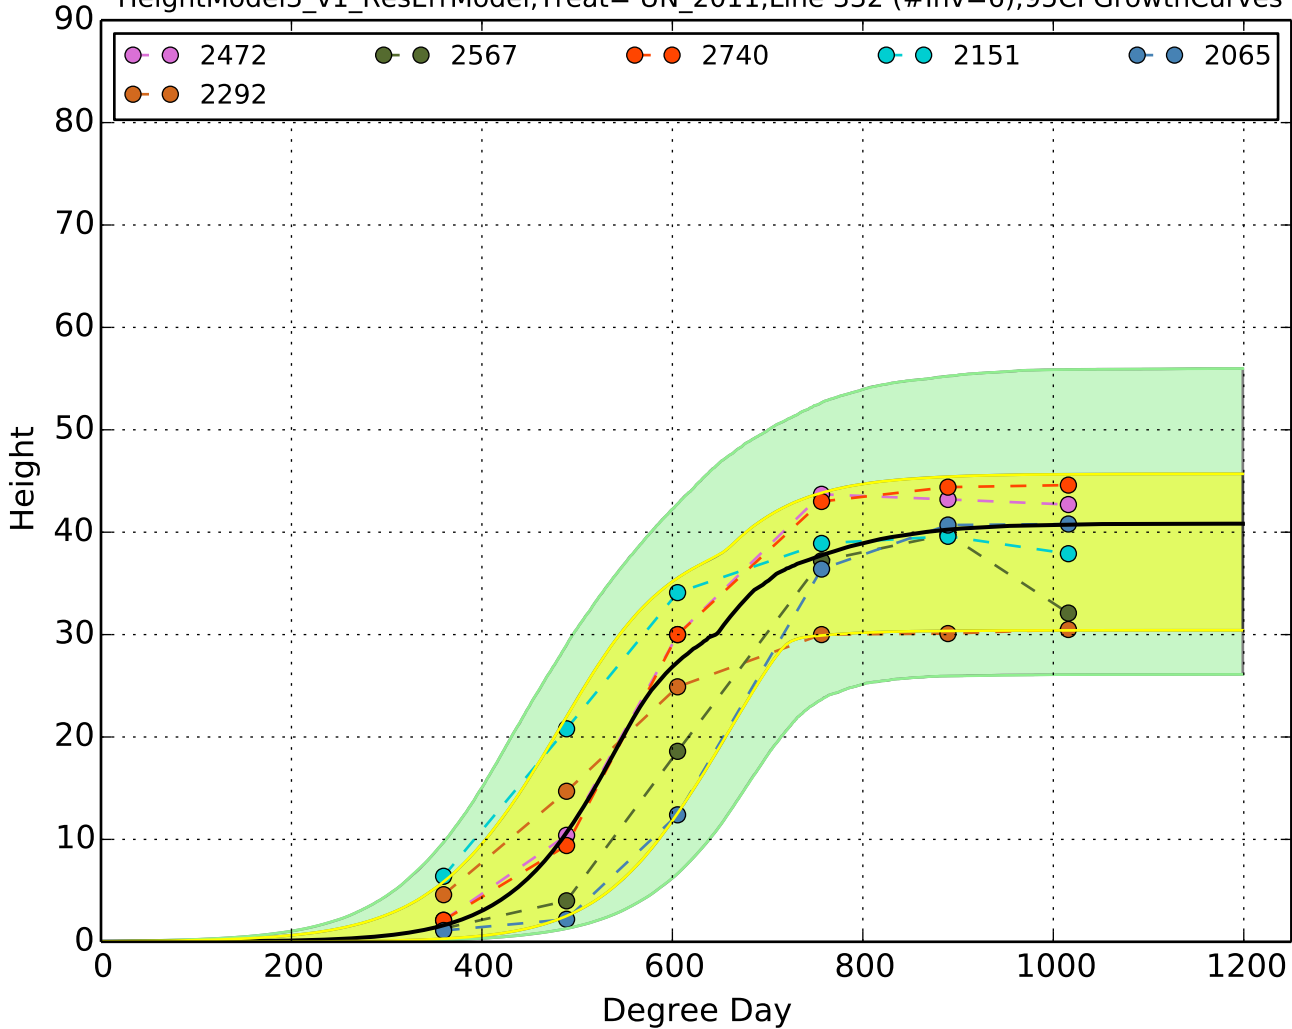

HeightModel3\_v1\_ResErrModel,Treat= UN\_2011,Line 337 (#Inv=4);95CI GrowthCurves

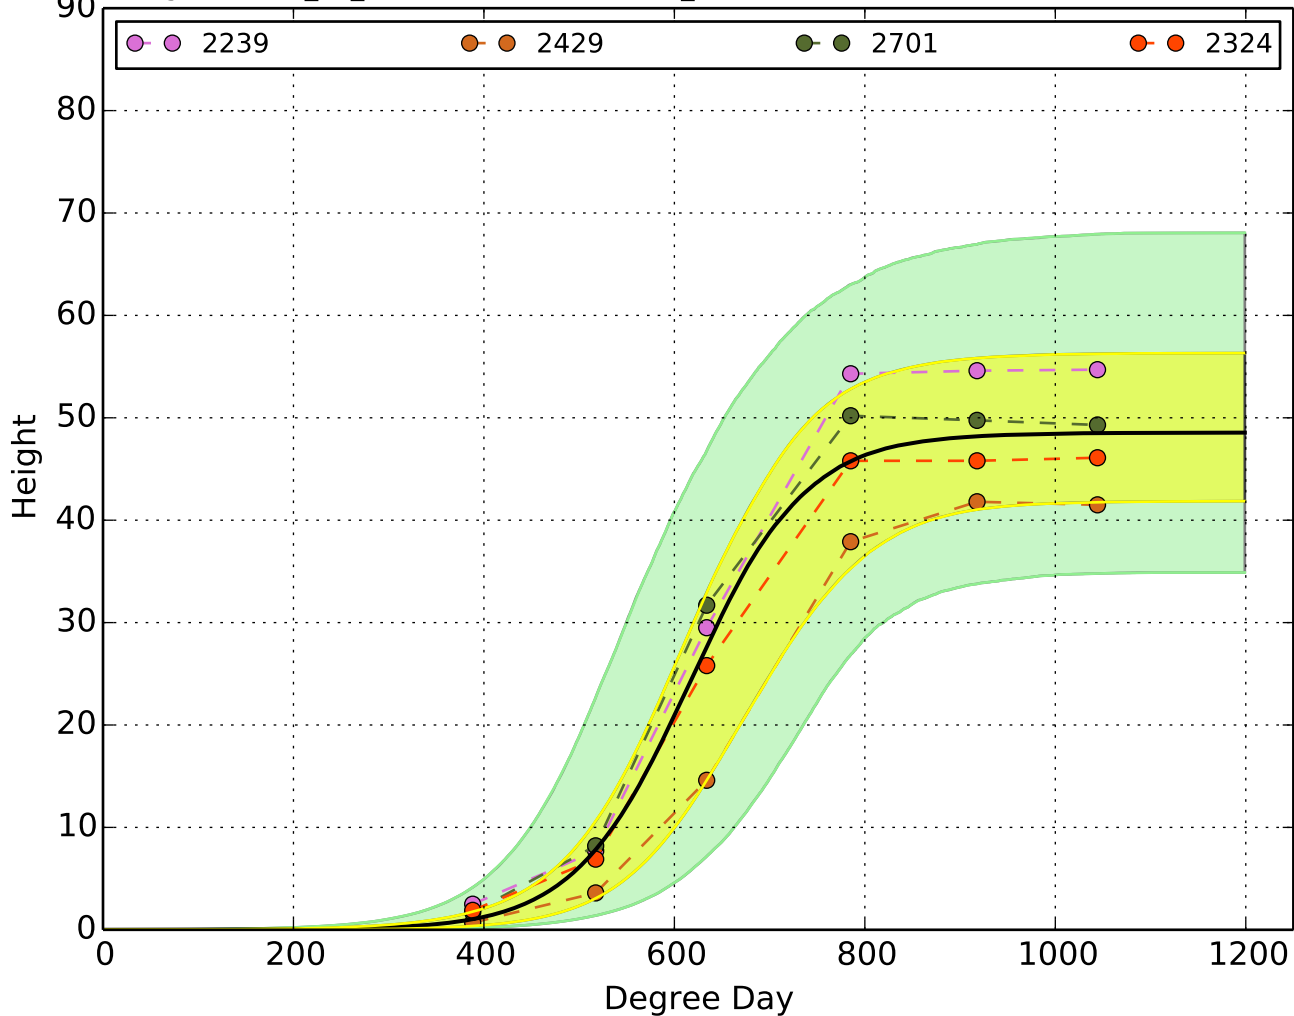

HeightModel3\_v1\_ResErrModel,Treat= UN\_2011,Line 339 (#Inv=18);95CI GrowthCurves

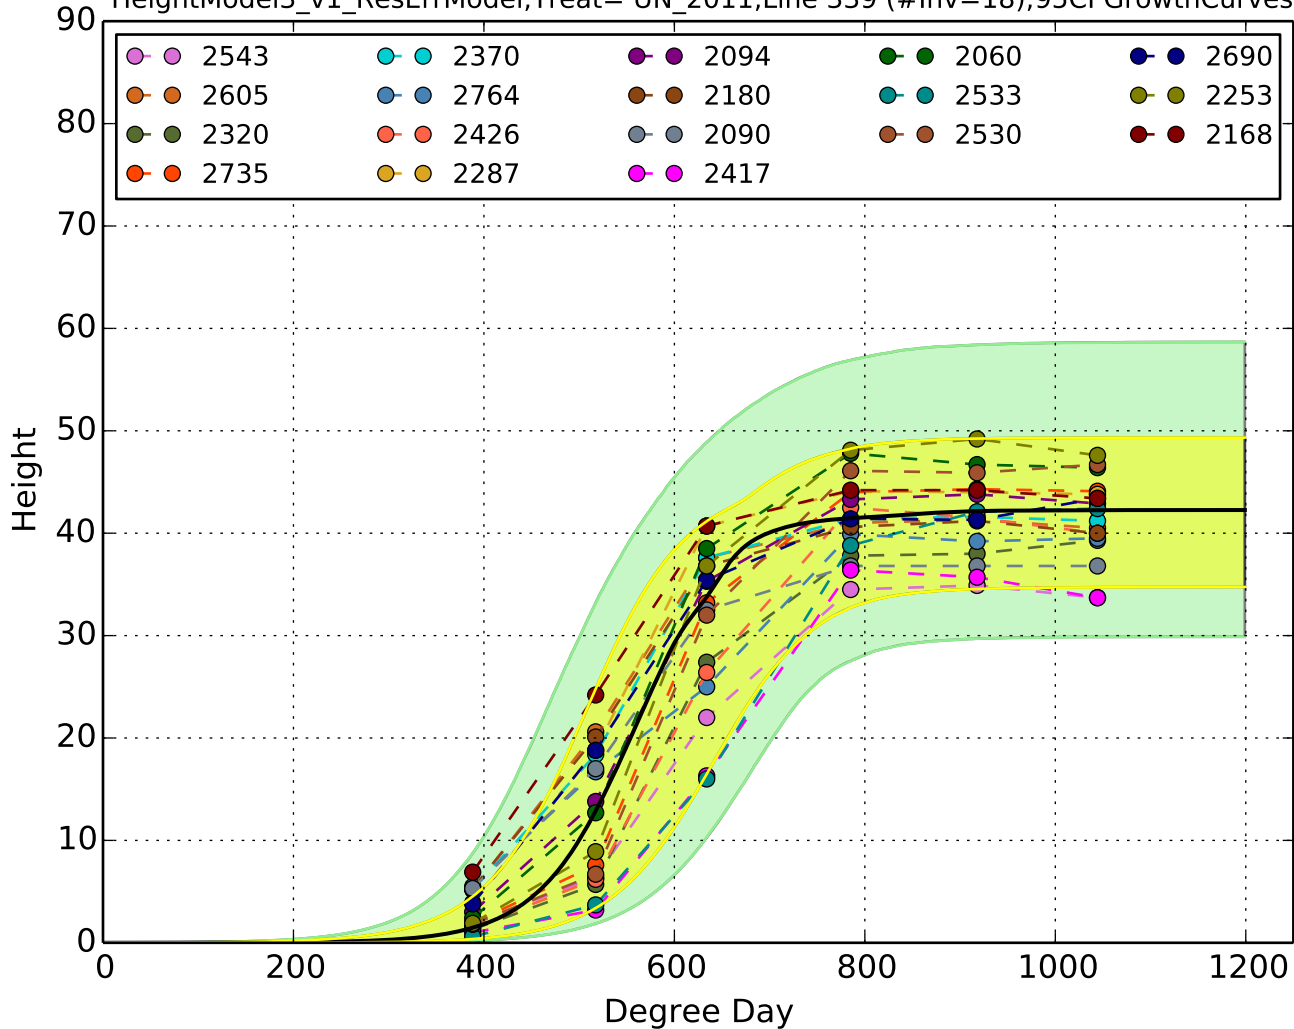



HeightModel3\_v1\_ResErrModel,Treat= UN\_2011,Line 340 (#Inv=5);95CI GrowthCurves

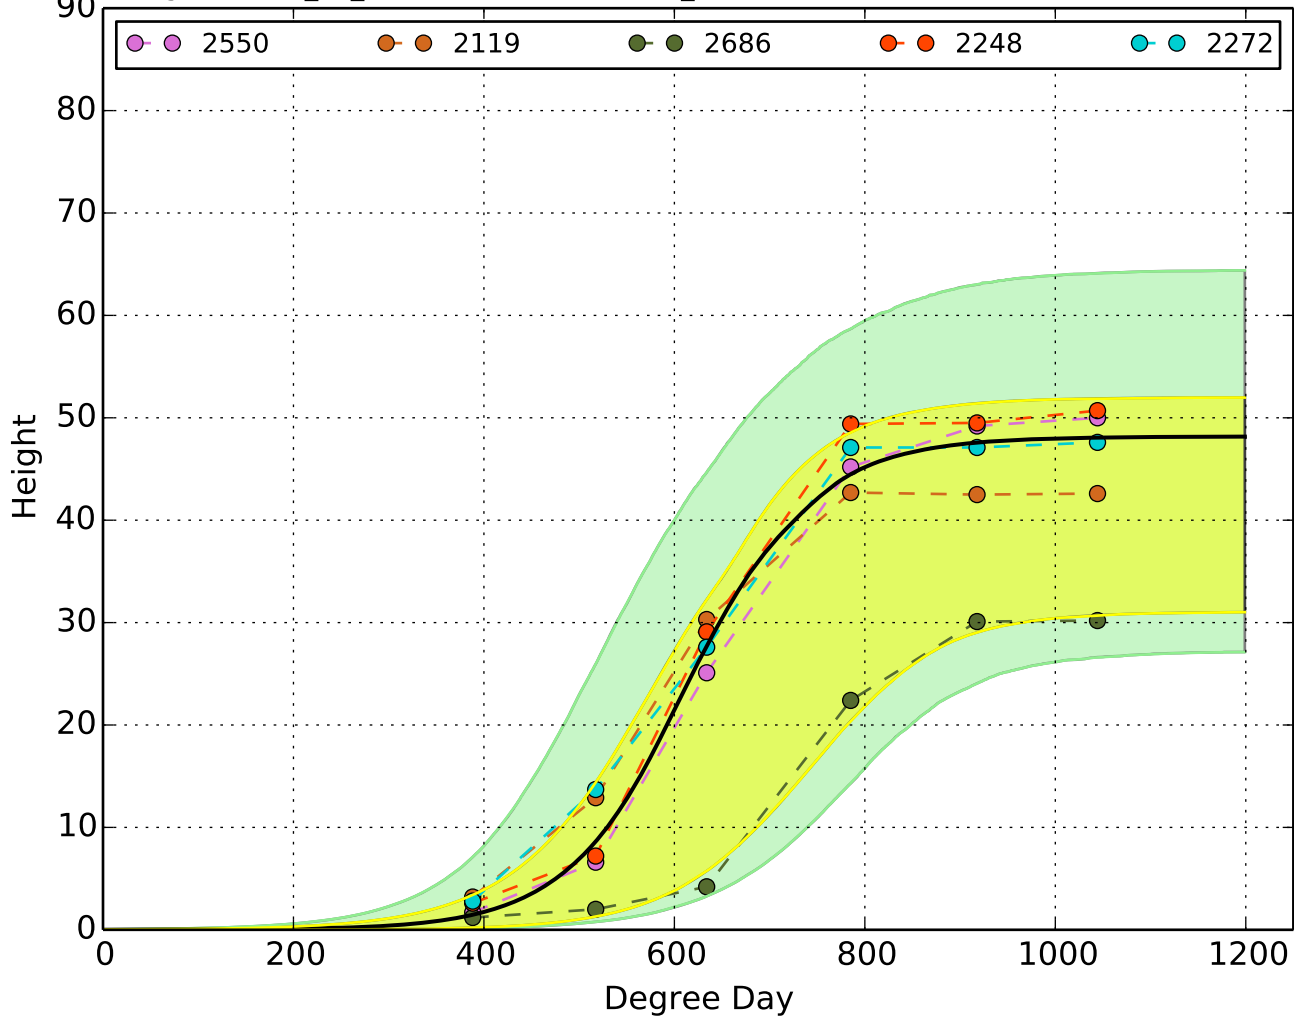

HeightModel3\_v1\_ResErrModel,Treat= UN\_2011,Line 341 (#Inv=5);95CI GrowthCurves

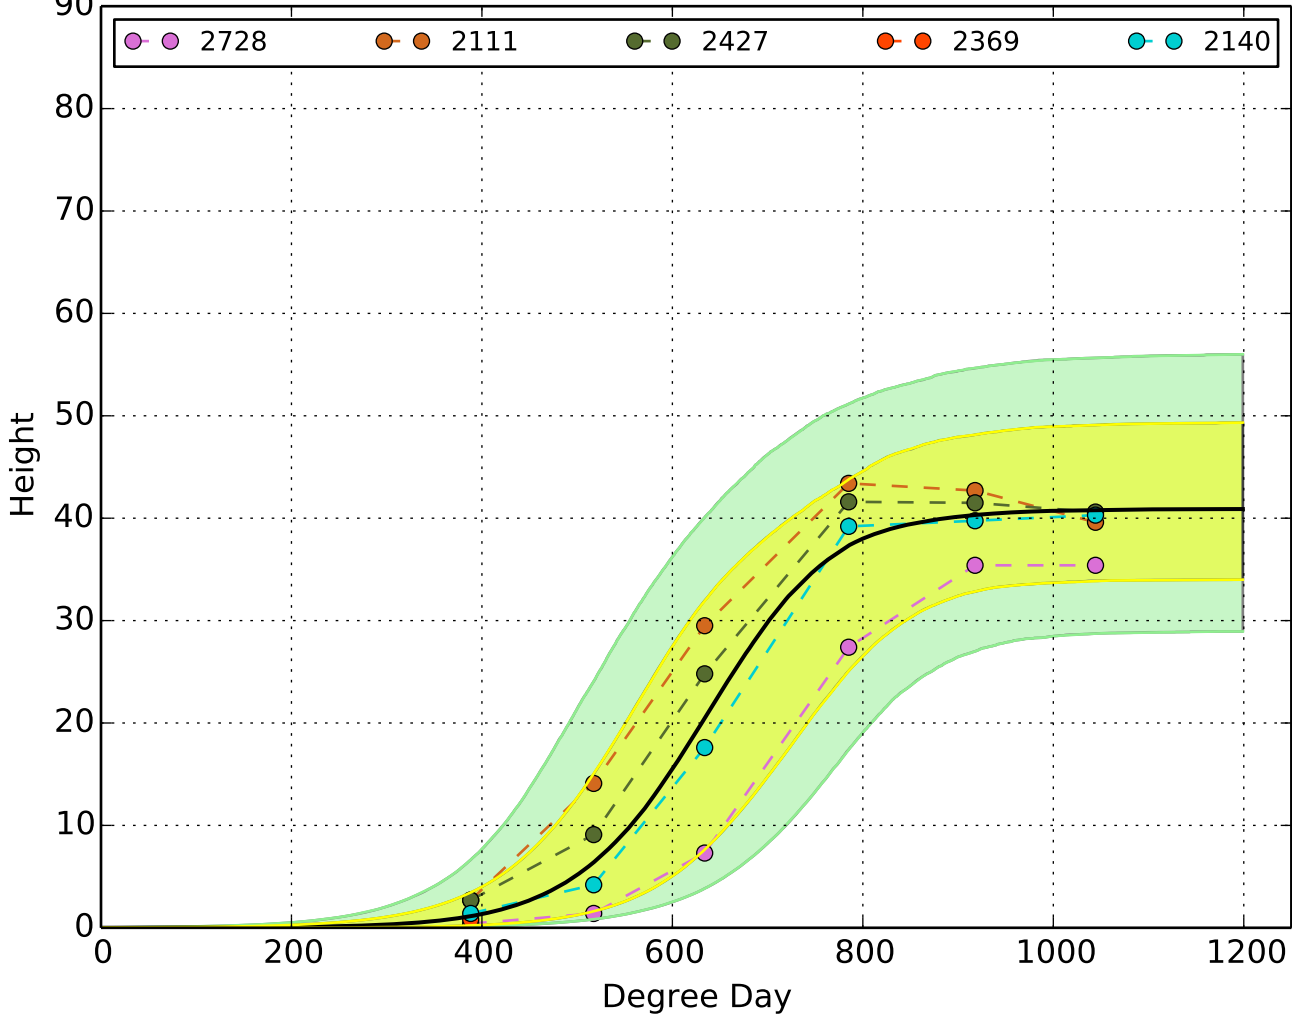

HeightModel3\_v1\_ResErrModel,Treat= UN\_2011,Line 344 (#Inv=6);95CI GrowthCurves

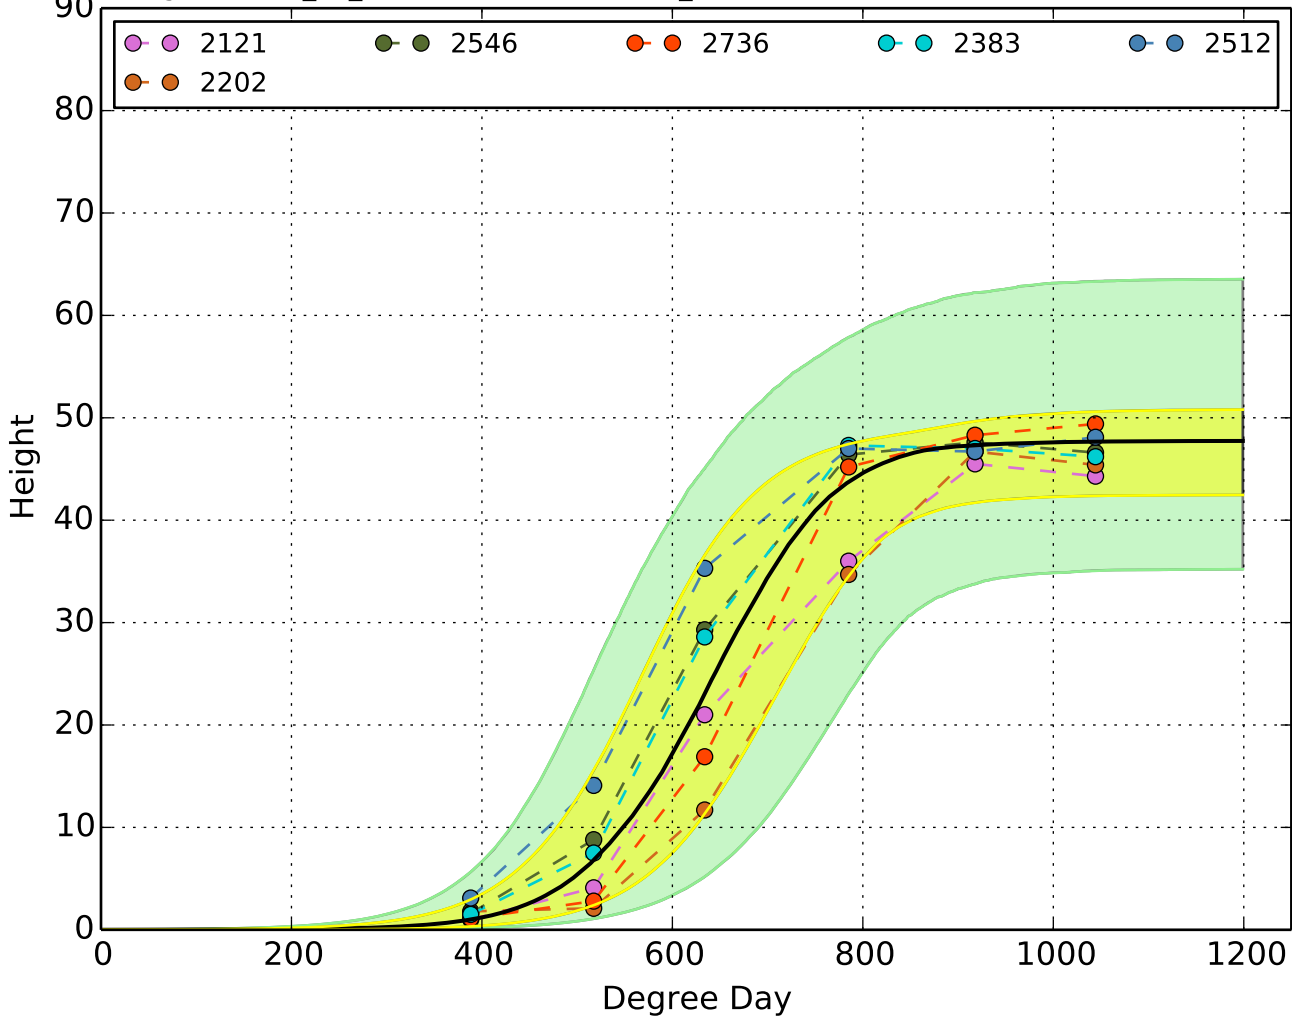

HeightModel3\_v1\_ResErrModel,Treat= UN\_2011,Line 346 (#Inv=5);95CI GrowthCurves

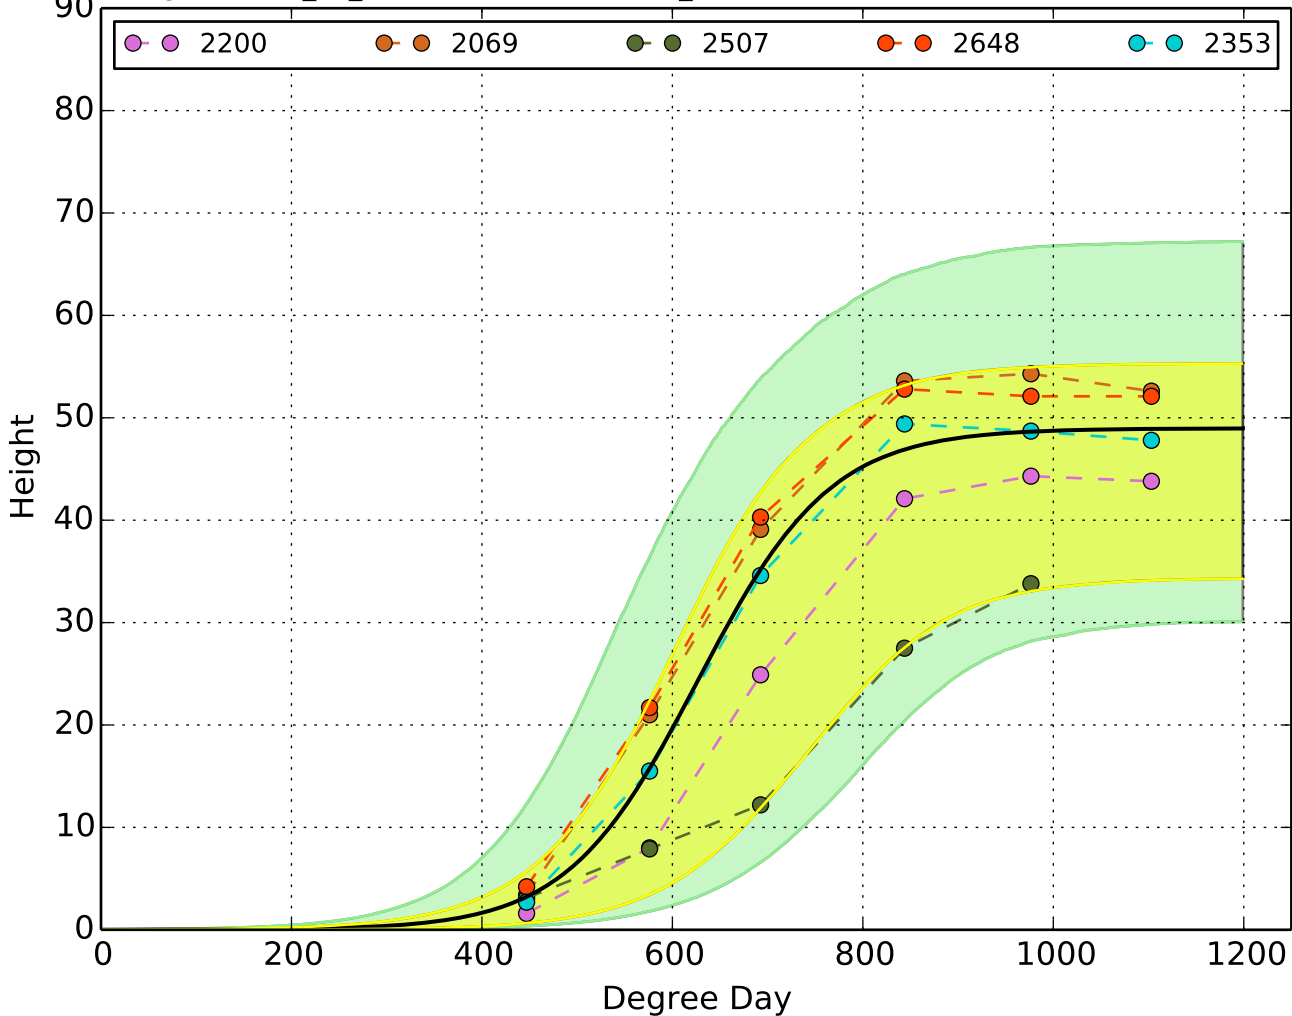

HeightModel3\_v1\_ResErrModel,Treat= UN\_2011,Line 347 (#Inv=11);95CI GrowthCurves

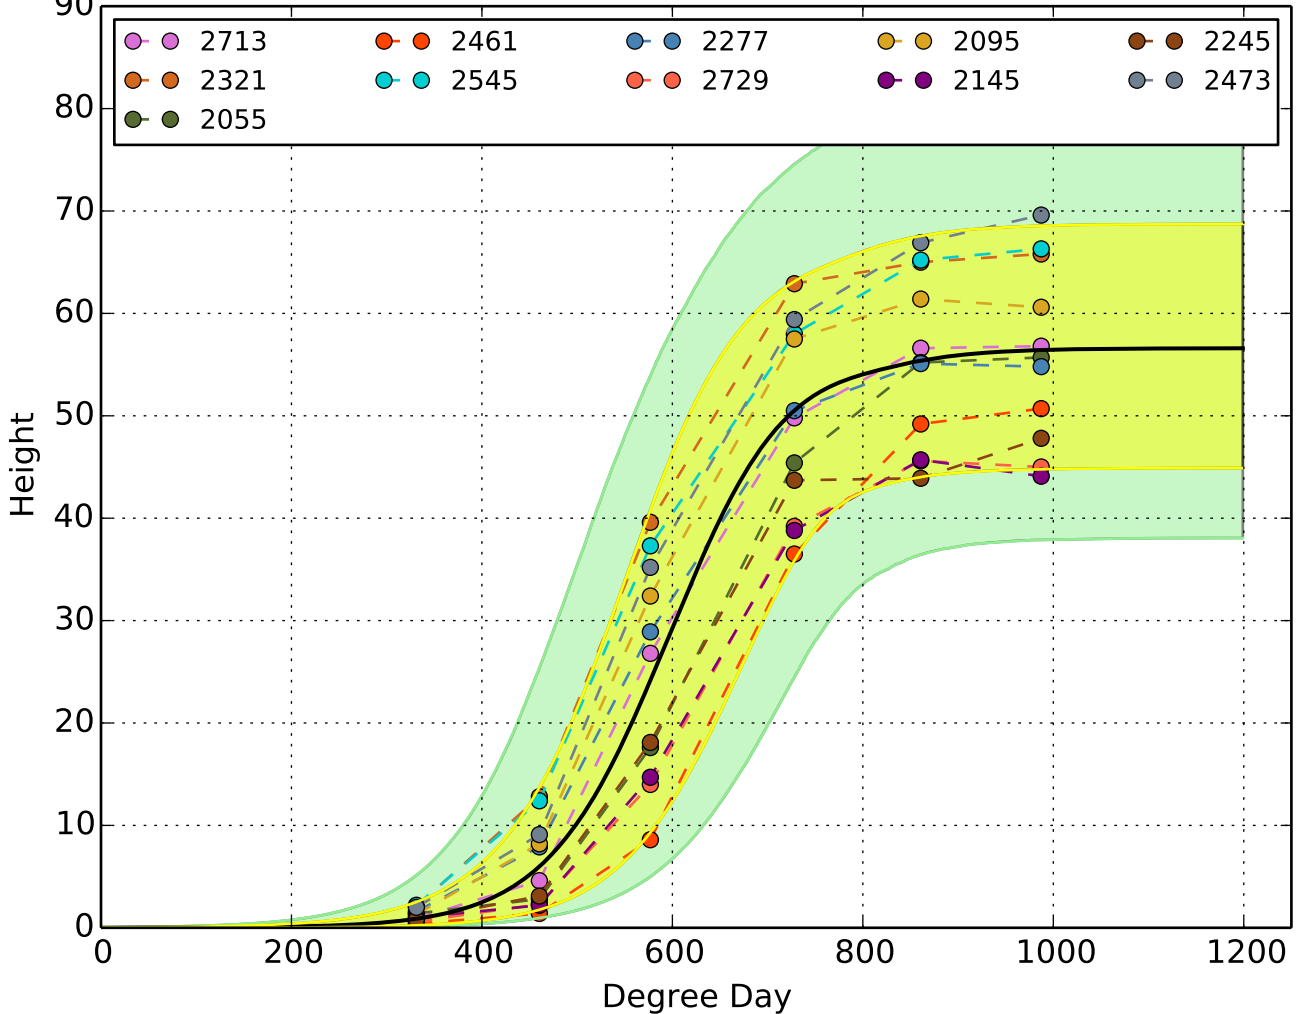

HeightModel3\_v1\_ResErrModel,Treat= UN\_2011,Line 353 (#Inv=6);95CI GrowthCurves

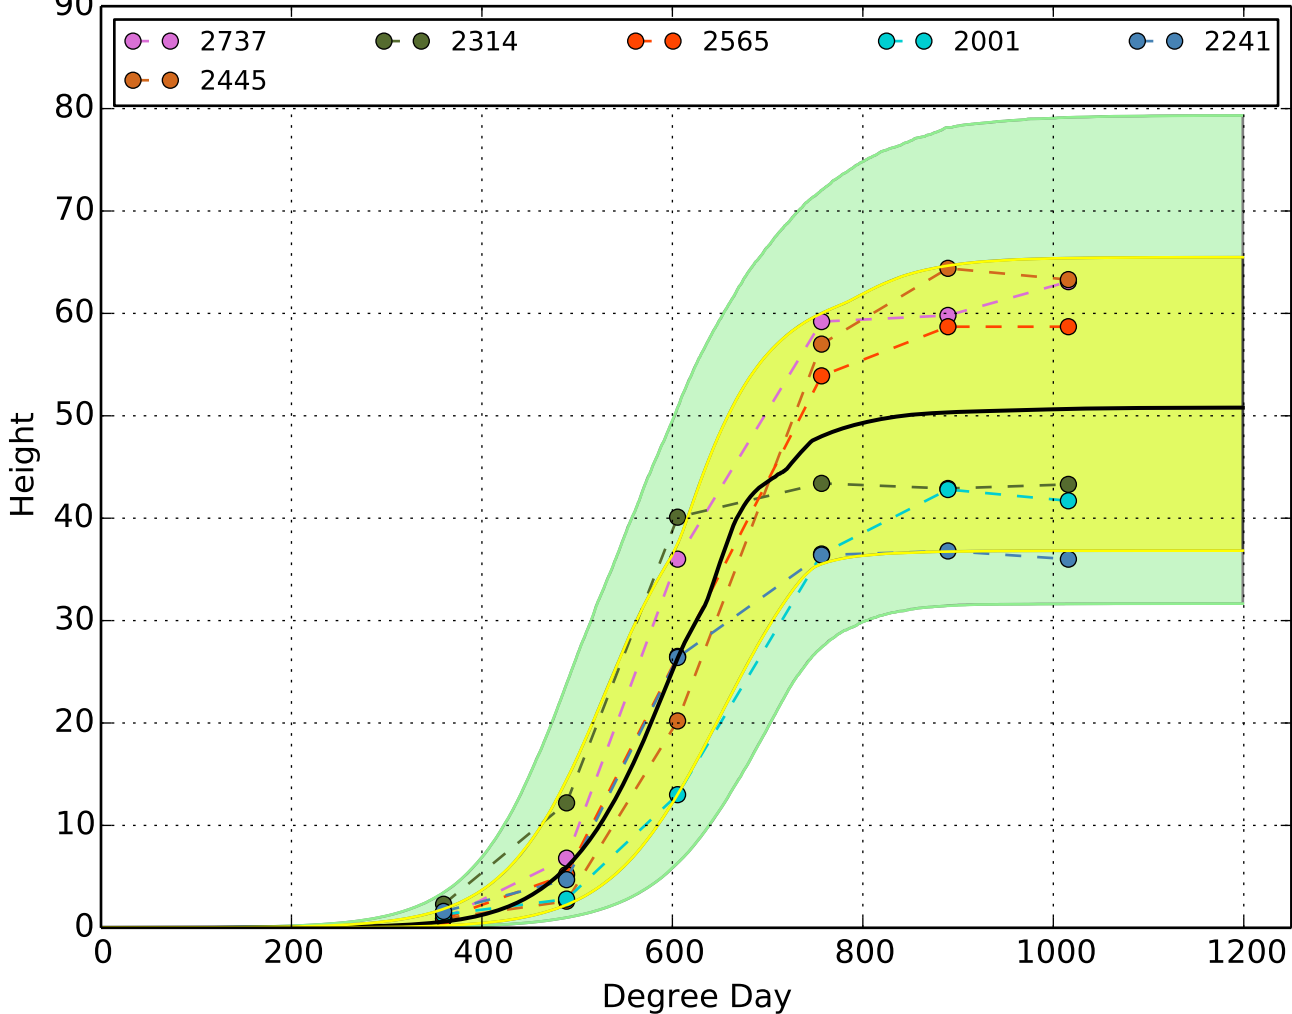

HeightModel3\_v1\_ResErrModel,Treat= UN\_2011,Line 354 (#Inv=5);95CI GrowthCurves

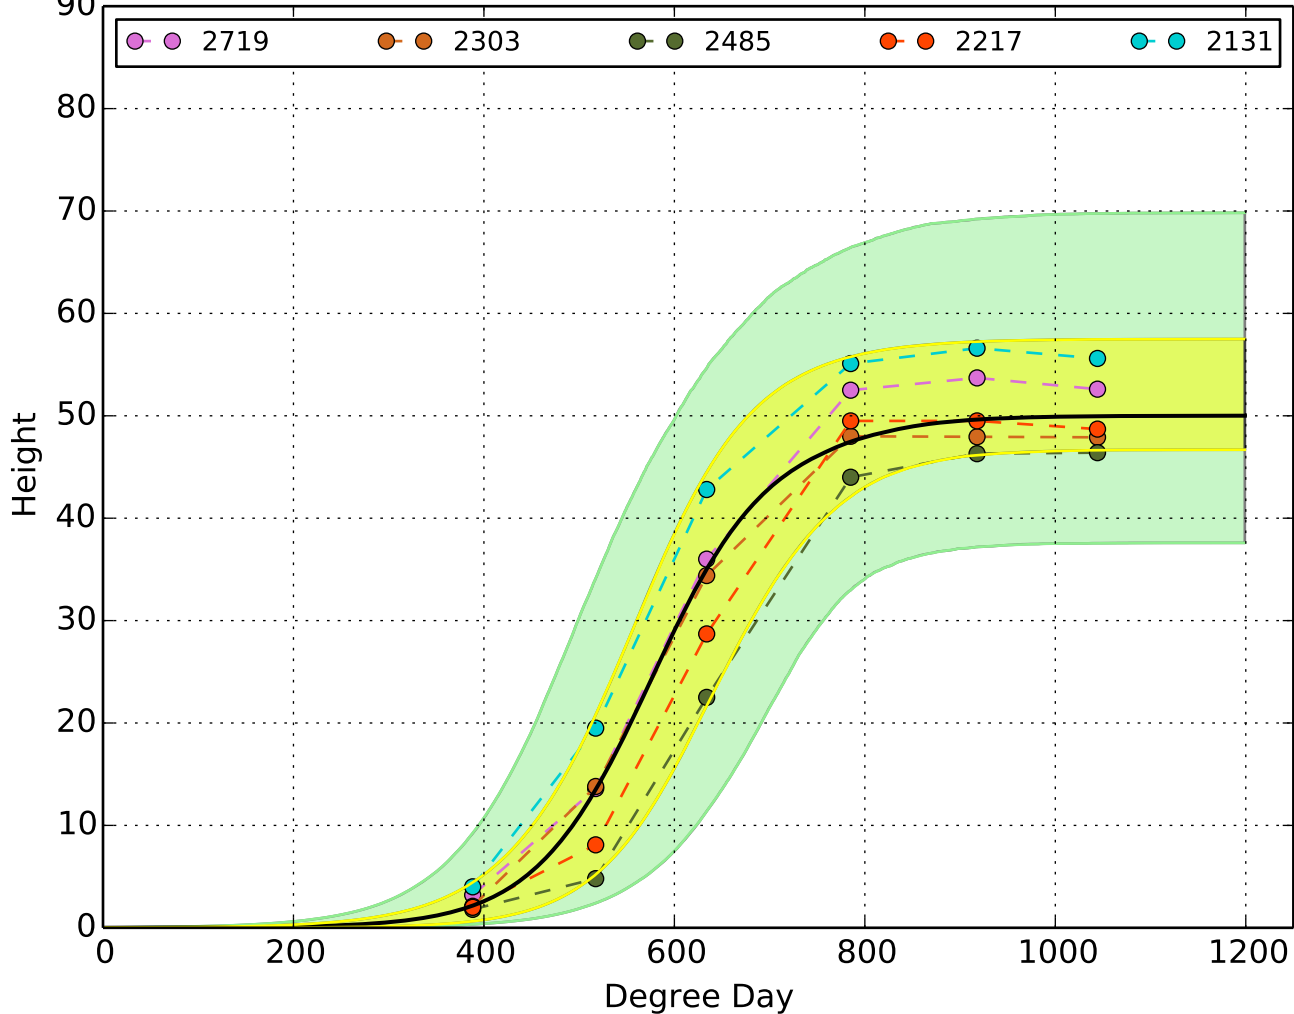

HeightModel3\_v1\_ResErrModel,Treat= UN\_2011,Line 355 (#Inv=6);95CI GrowthCurves

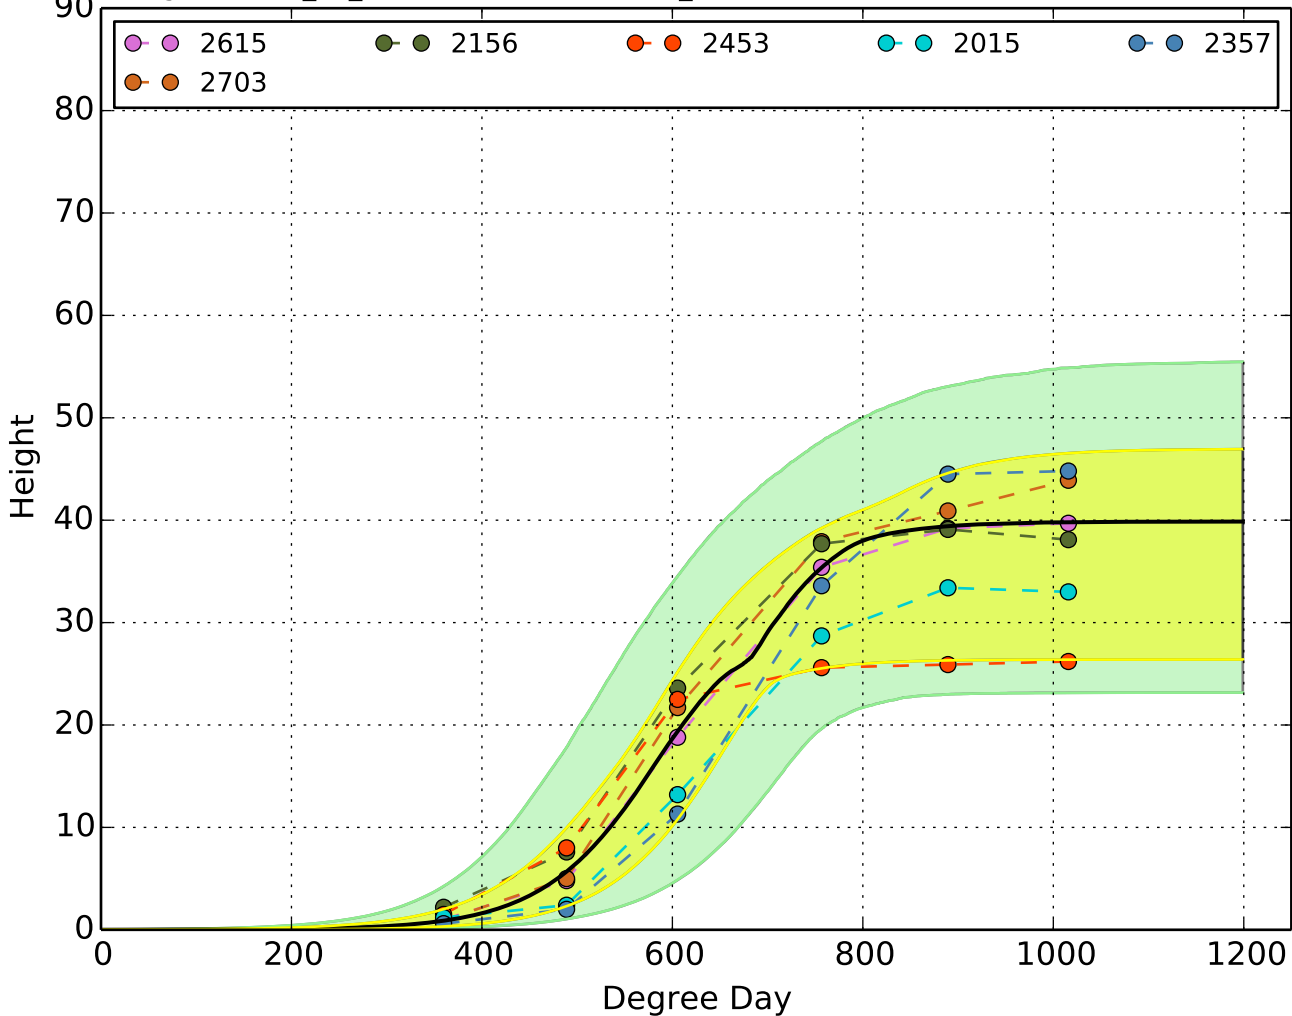



HeightModel3\_v1\_ResErrModel,Treat= UN\_2011,Line 357 (#Inv=6);95CI GrowthCurves

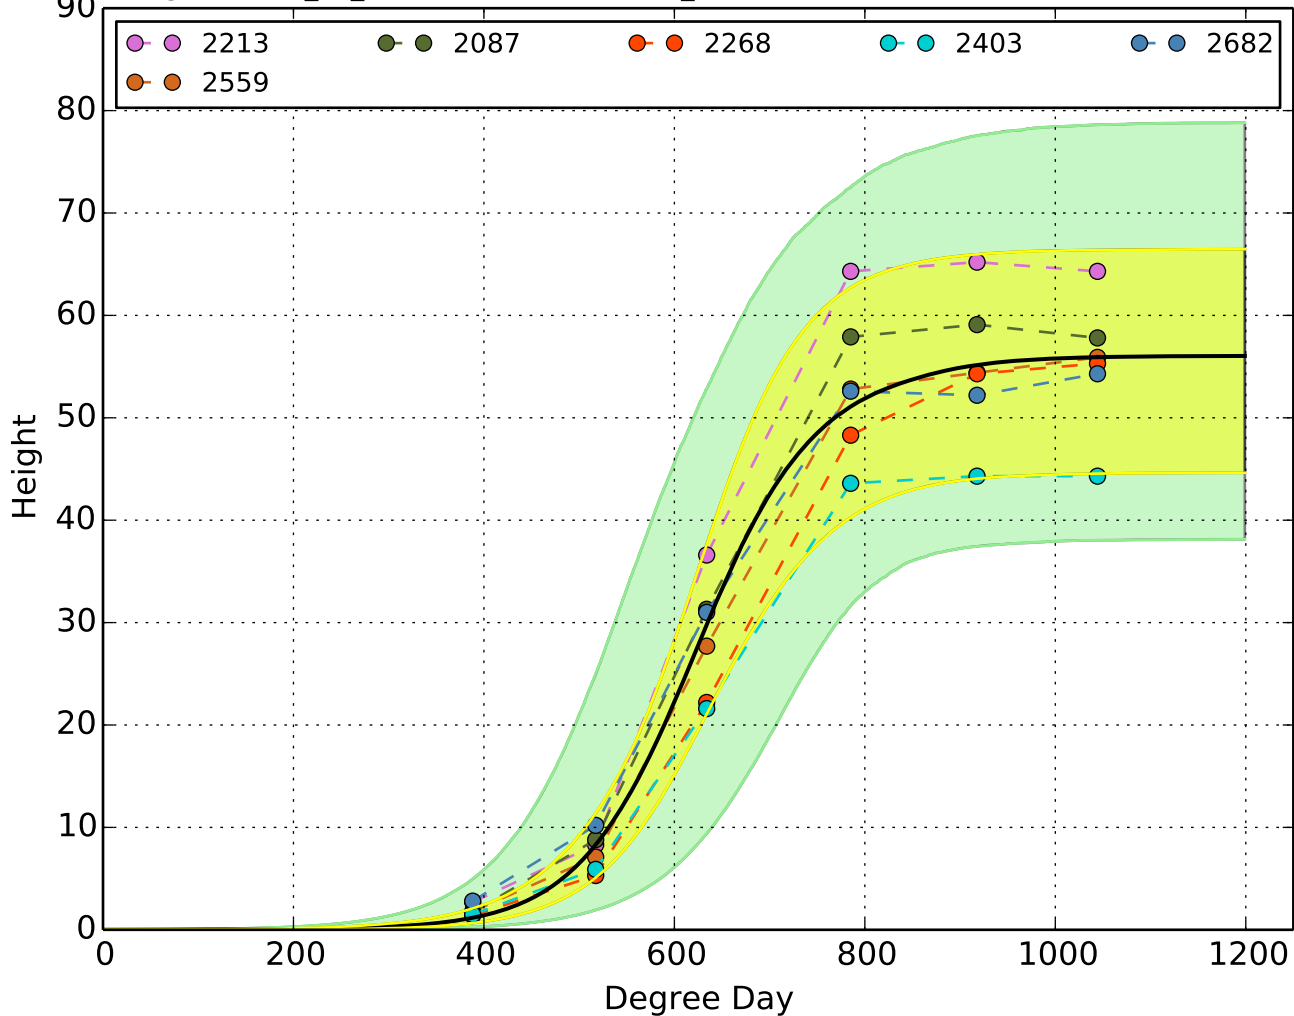

HeightModel3\_v1\_ResErrModel,Treat= UN\_2011,Line 359 (#Inv=5);95CI GrowthCurves

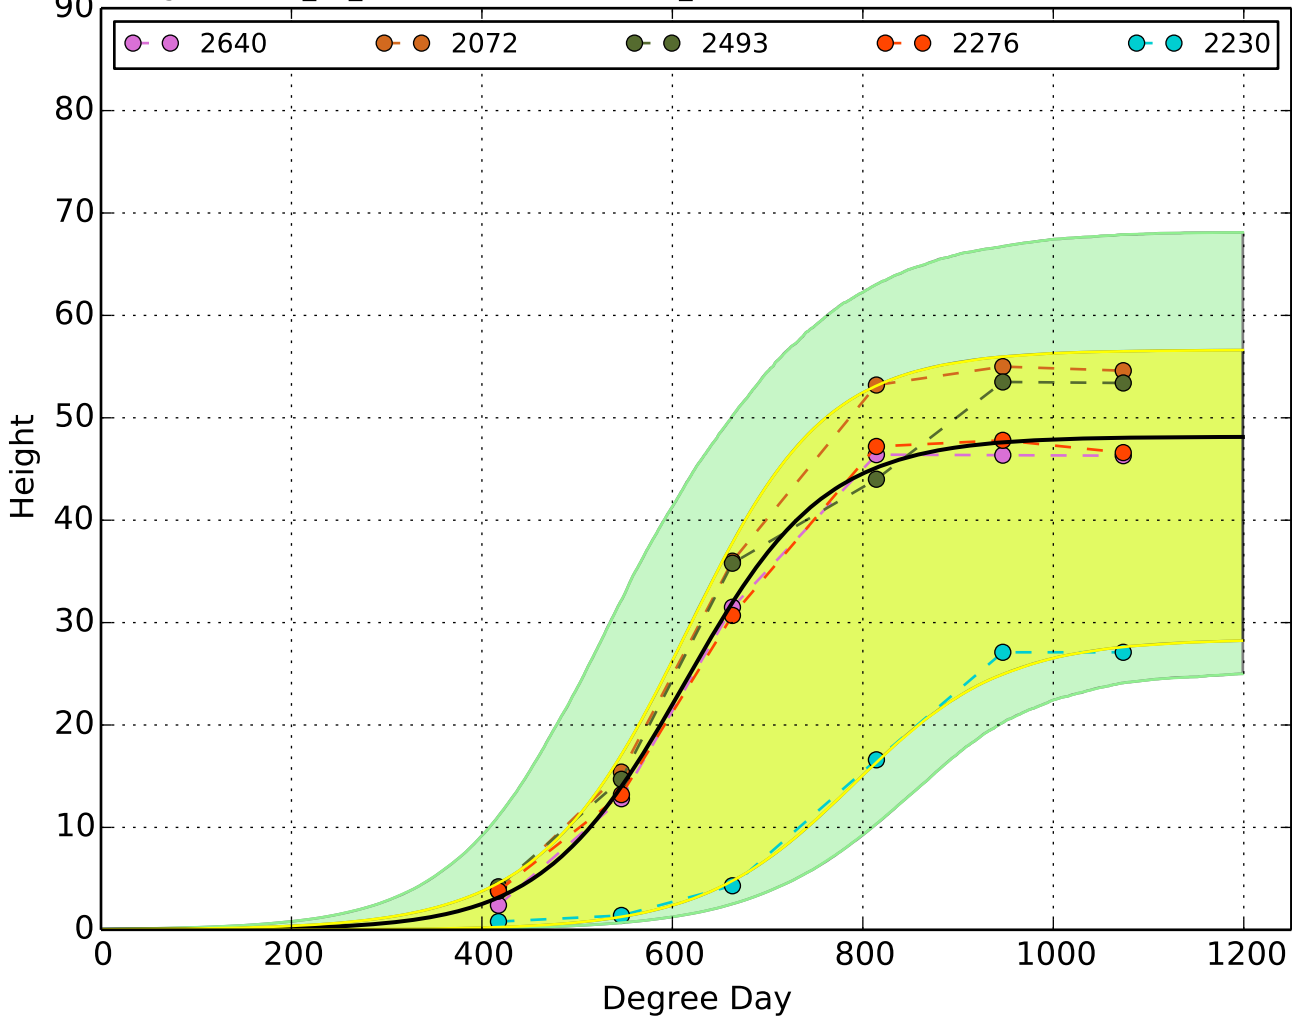

HeightModel3\_v1\_ResErrModel,Treat= UN\_2011,Line 360 (#Inv=4);95CI GrowthCurves

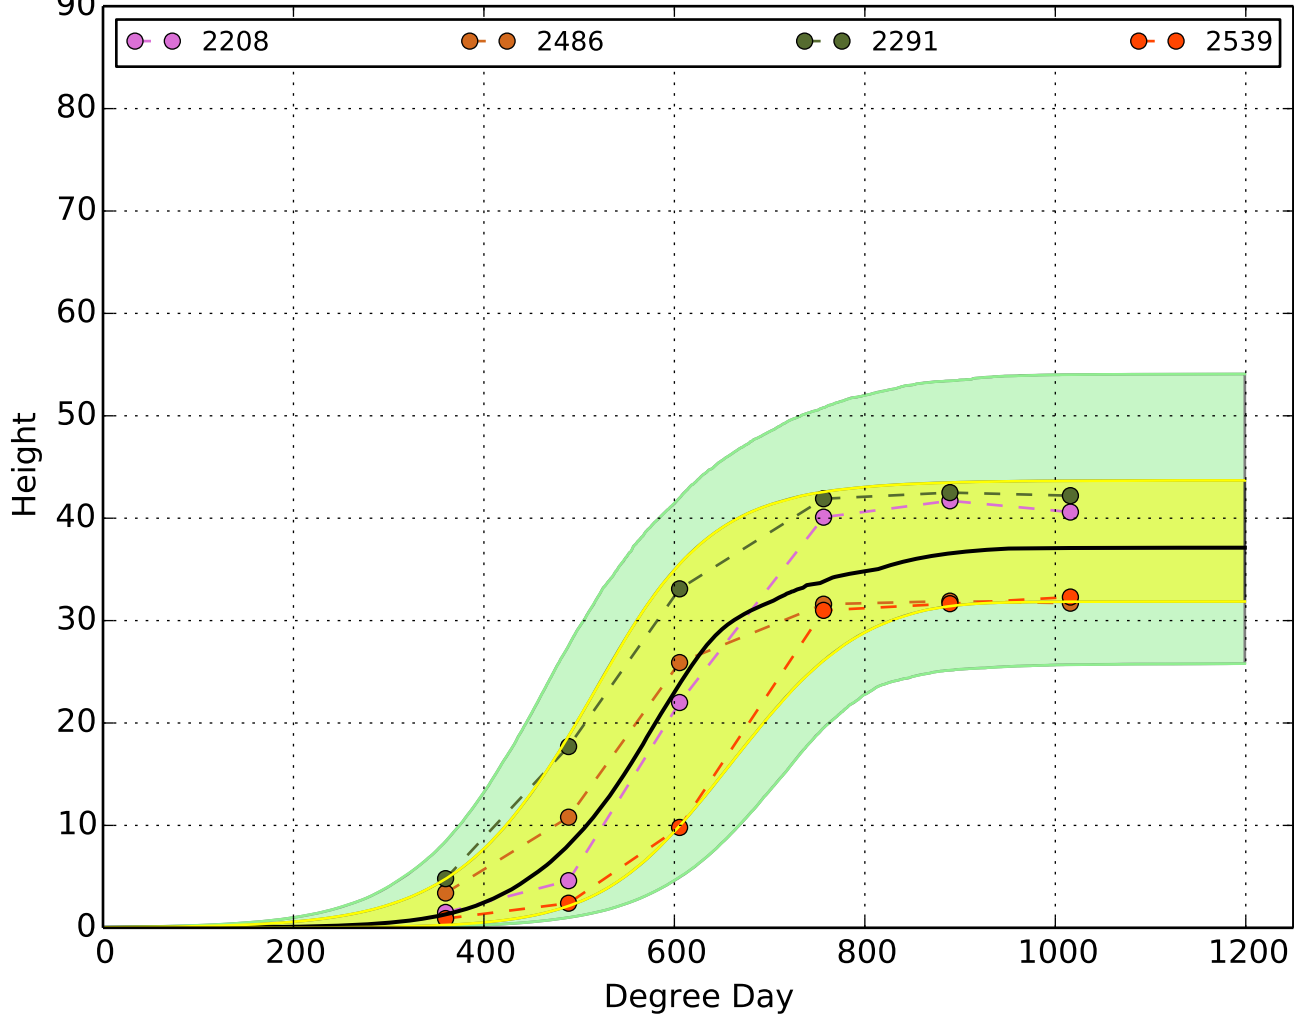

HeightModel3\_v1\_ResErrModel,Treat= UN\_2011,Line 363 (#Inv=6);95CI GrowthCurves

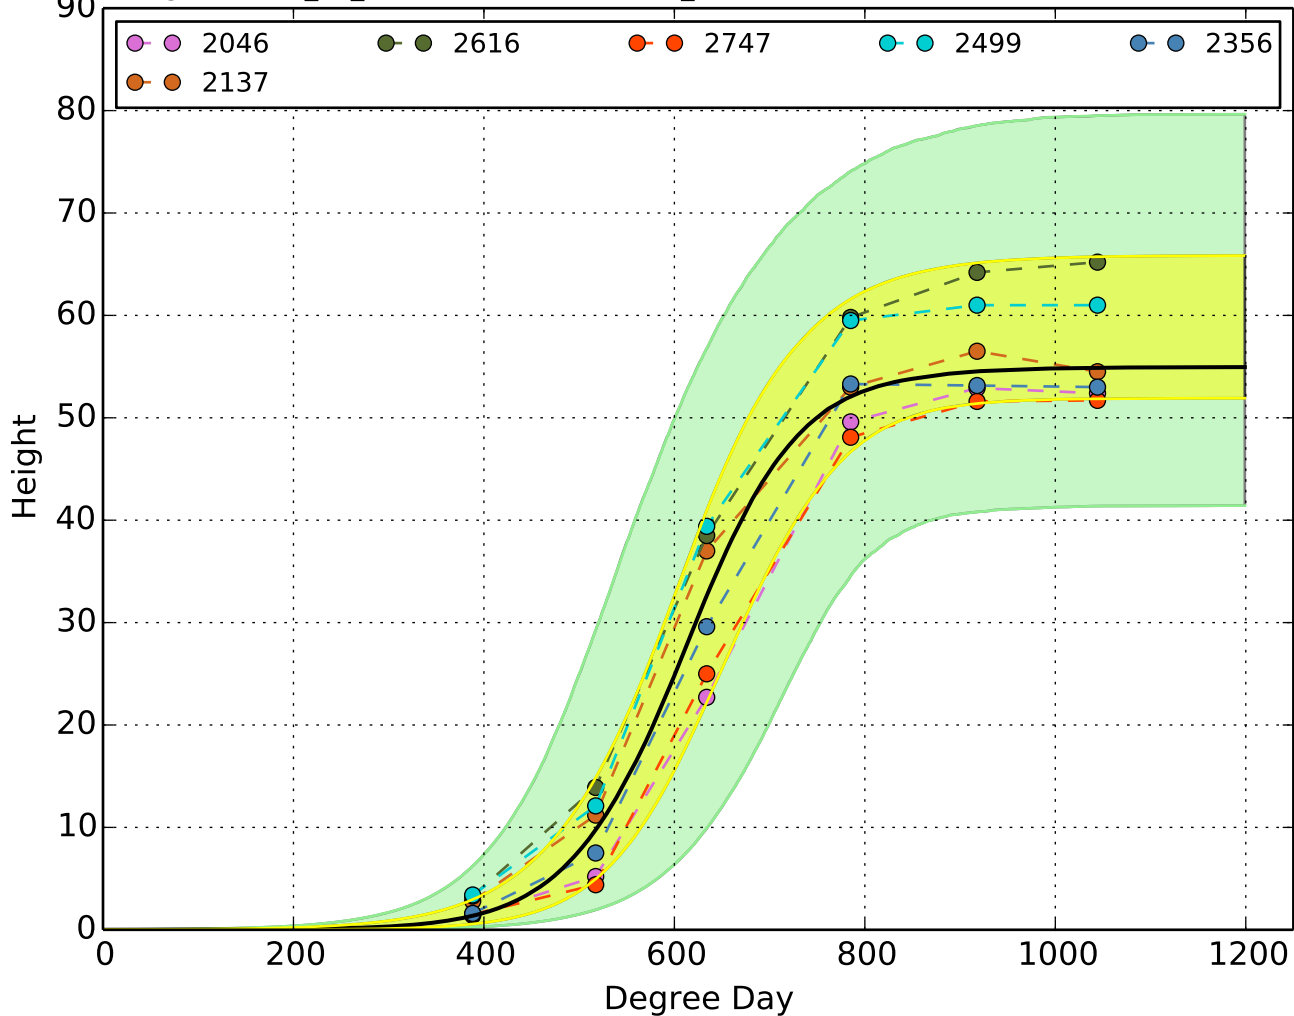

HeightModel3\_v1\_ResErrModel,Treat= UN\_2011,Line 373 (#Inv=6);95CI GrowthCurves

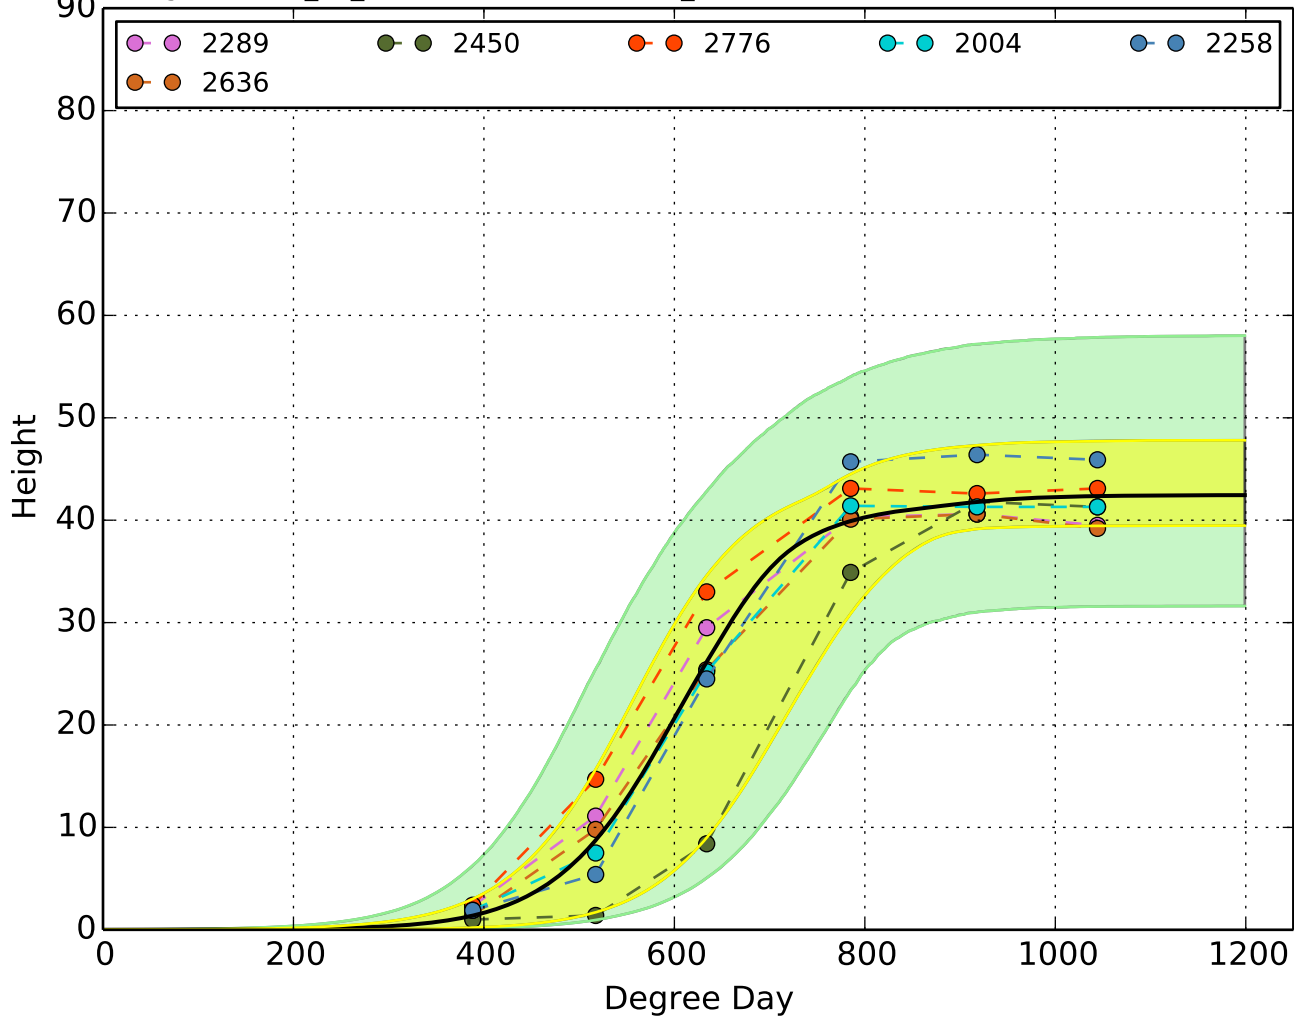

HeightModel3\_v1\_ResErrModel,Treat= UN\_2011,Line 376 (#Inv=5);95CI GrowthCurves

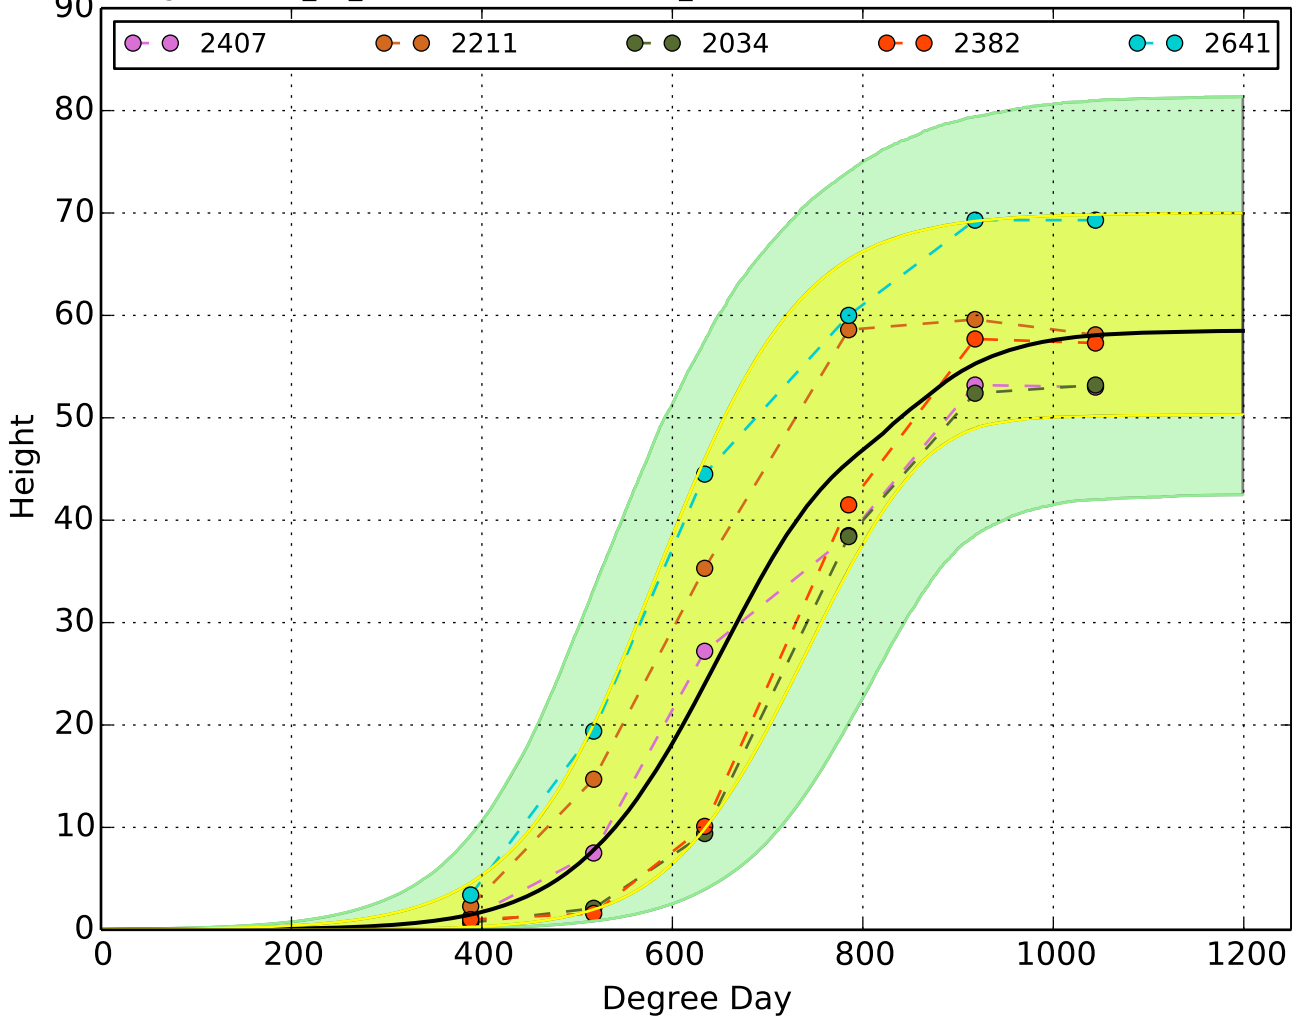

HeightModel3\_v1\_ResErrModel,Treat= UN\_2011,Line 380 (#Inv=6);95CI GrowthCurves

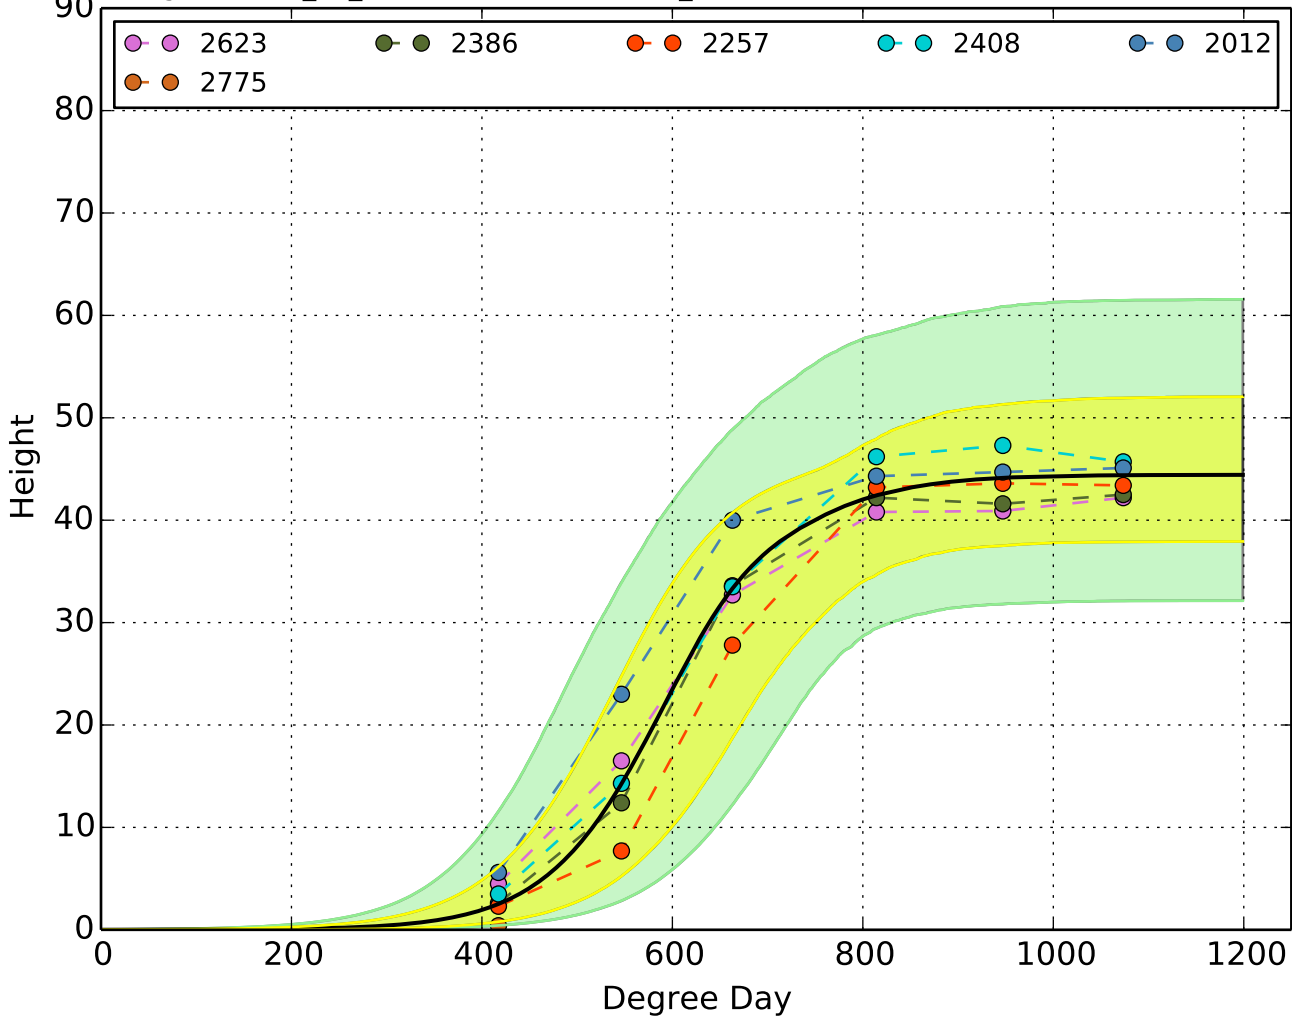

HeightModel3\_v1\_ResErrModel,Treat= UN\_2011,Line 500 (#Inv=6);95CI GrowthCurves

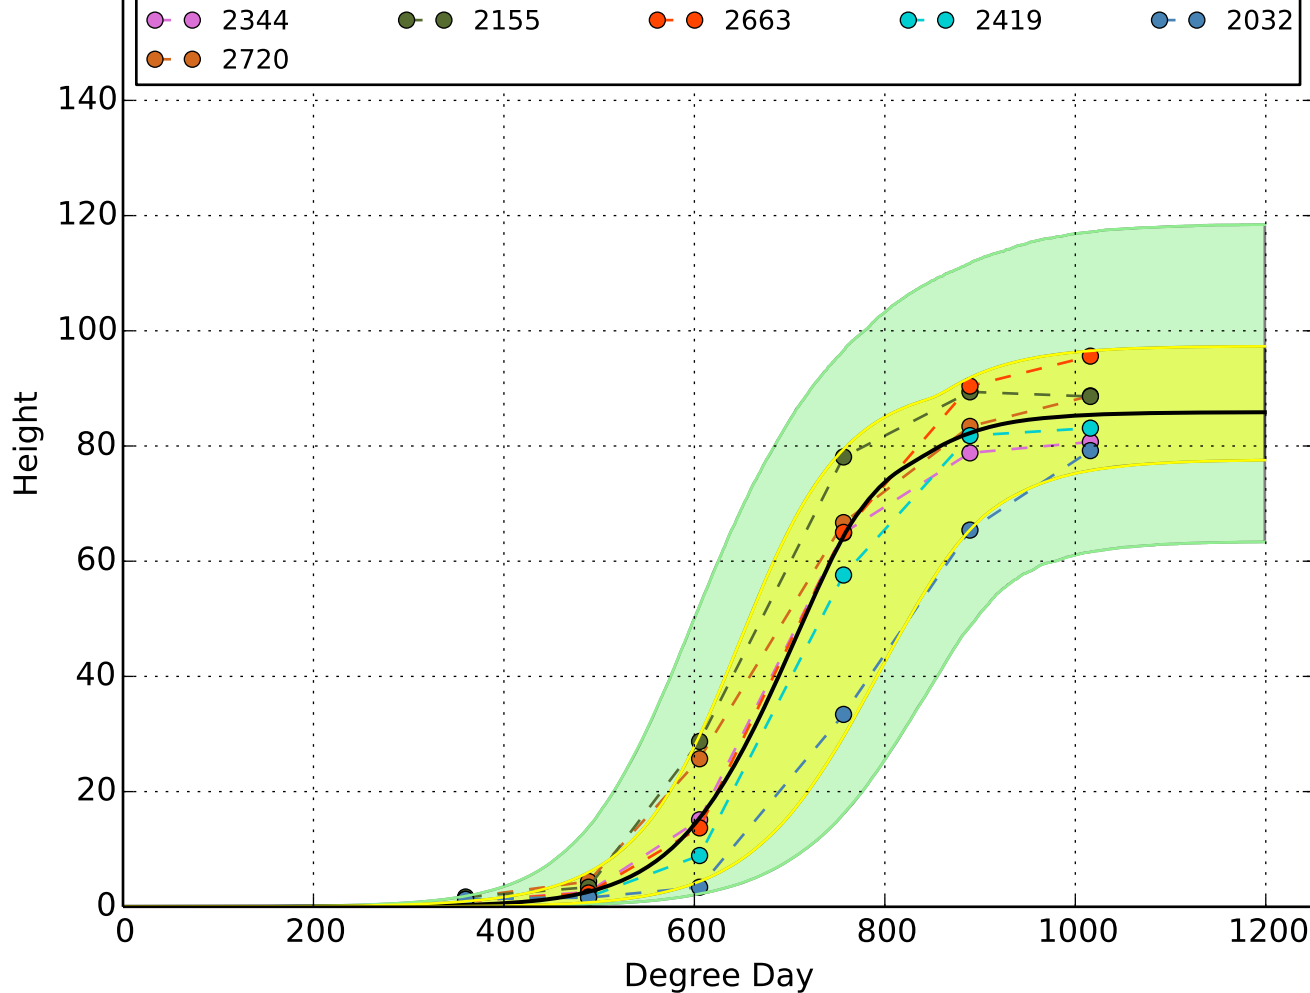



HeightModel3\_v1\_ResErrModel,Treat= UN\_2011,Line 511 (#Inv=5);95CI GrowthCurves

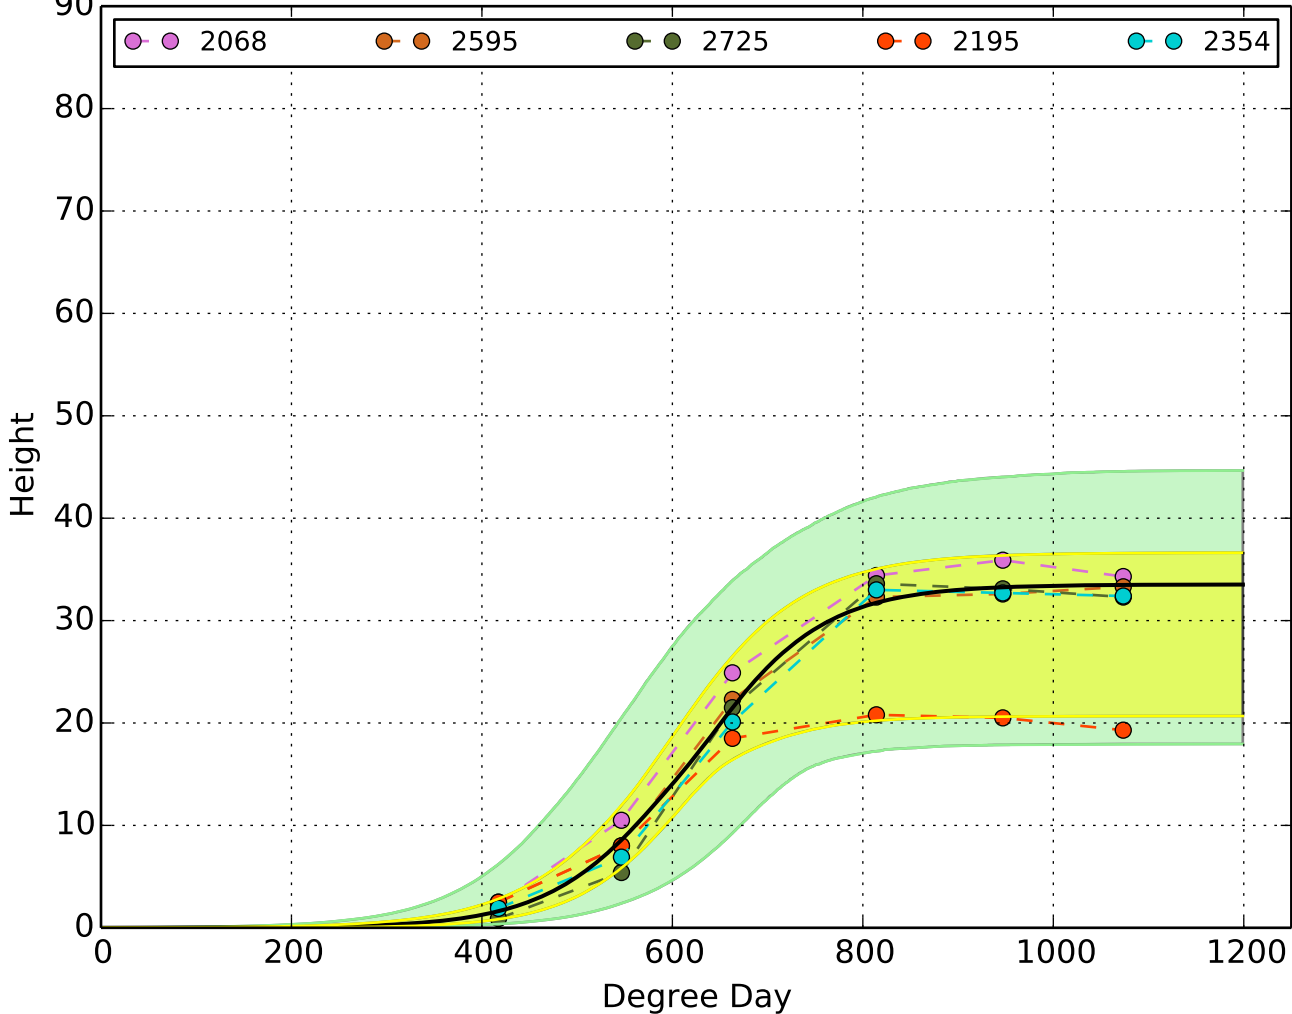

HeightModel3\_v1\_ResErrModel,Treat= CR\_2012,Line 1 (#Inv=5);95CI GrowthCurves

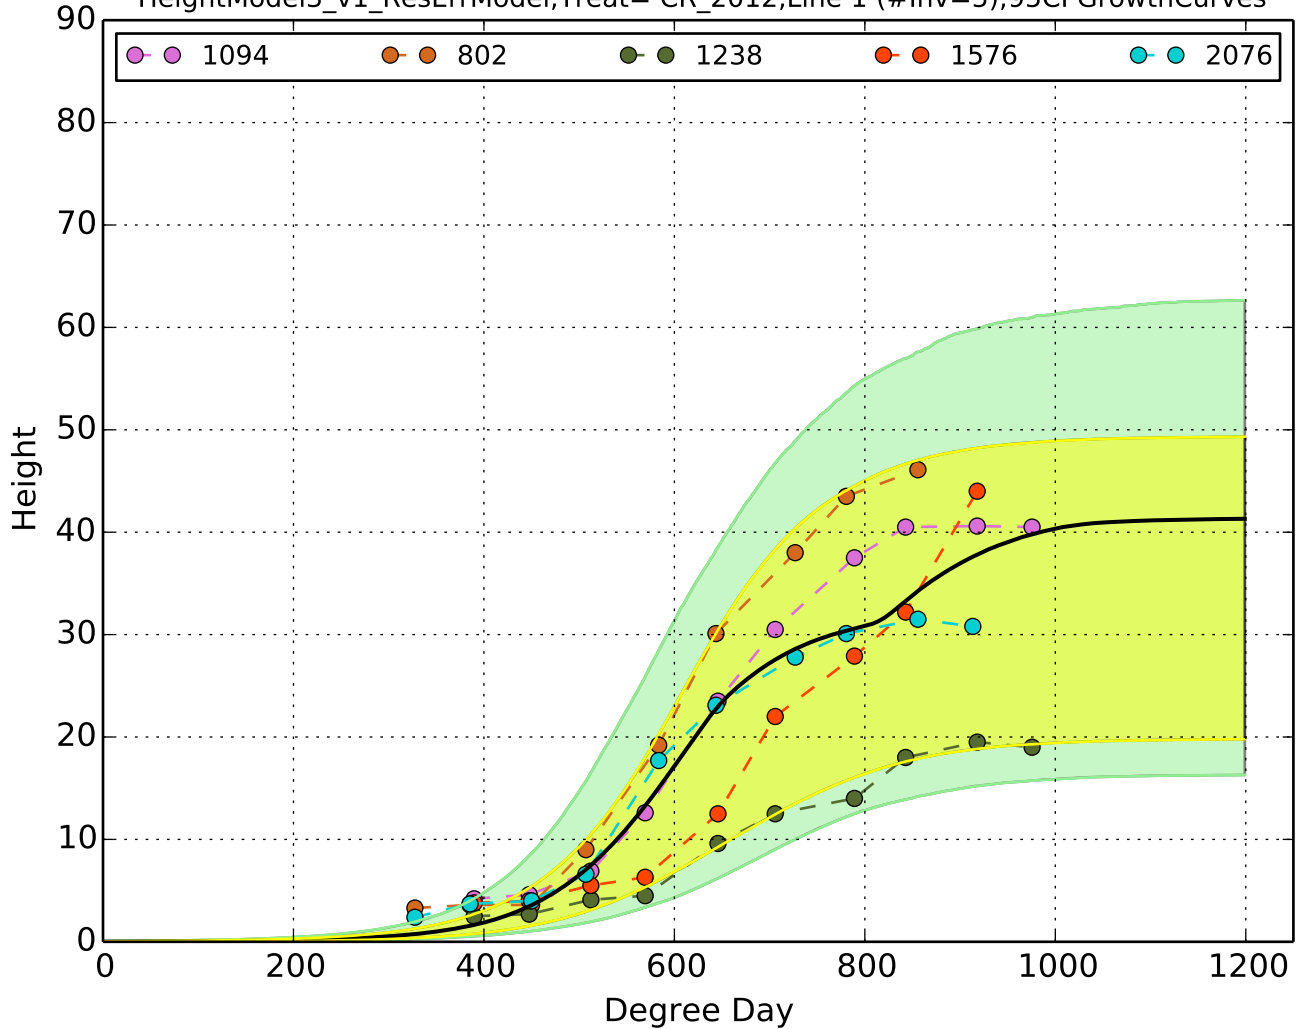

HeightModel3\_v1\_ResErrModel,Treat= CR\_2012,Line 2 (#Inv=5);95CI GrowthCurves

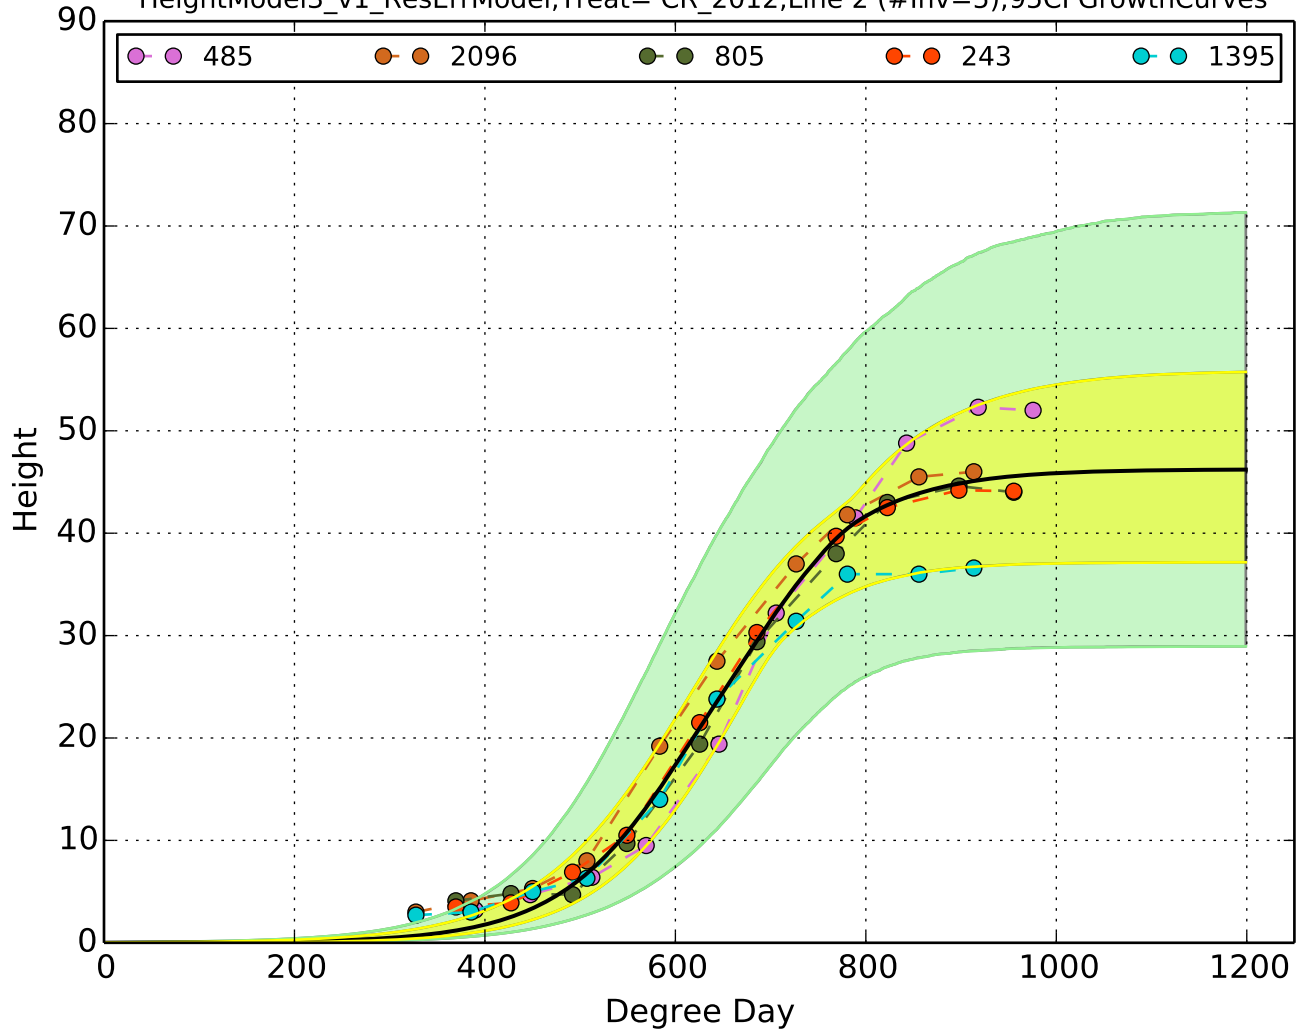

HeightModel3\_v1\_ResErrModel,Treat= CR\_2012,Line 7 (#Inv=6);95CI GrowthCurves

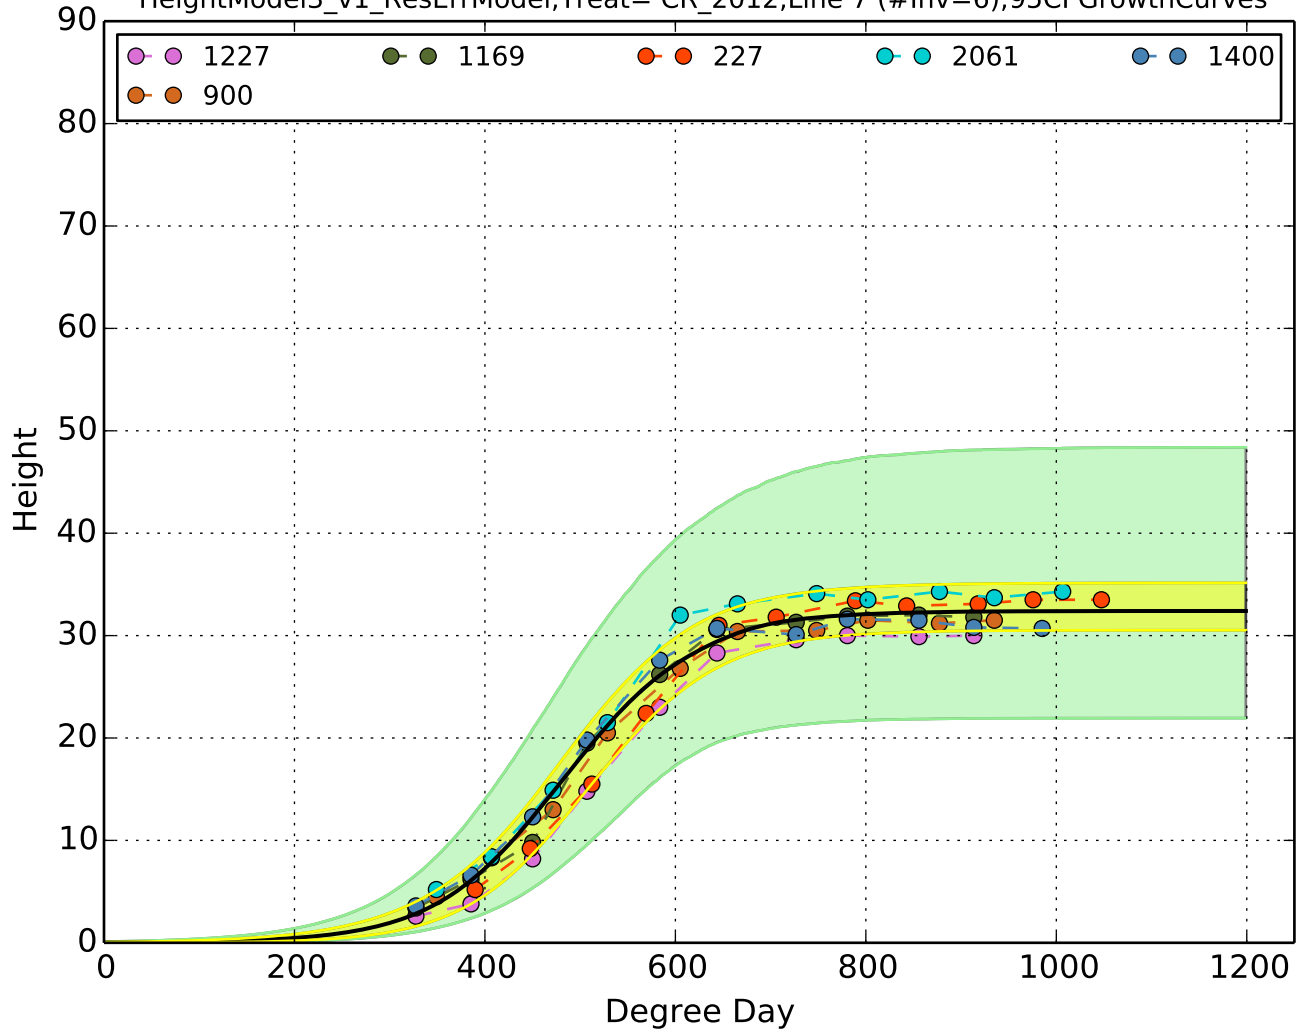

HeightModel3\_v1\_ResErrModel,Treat= CR\_2012,Line 9 (#Inv=7);95CI GrowthCurves

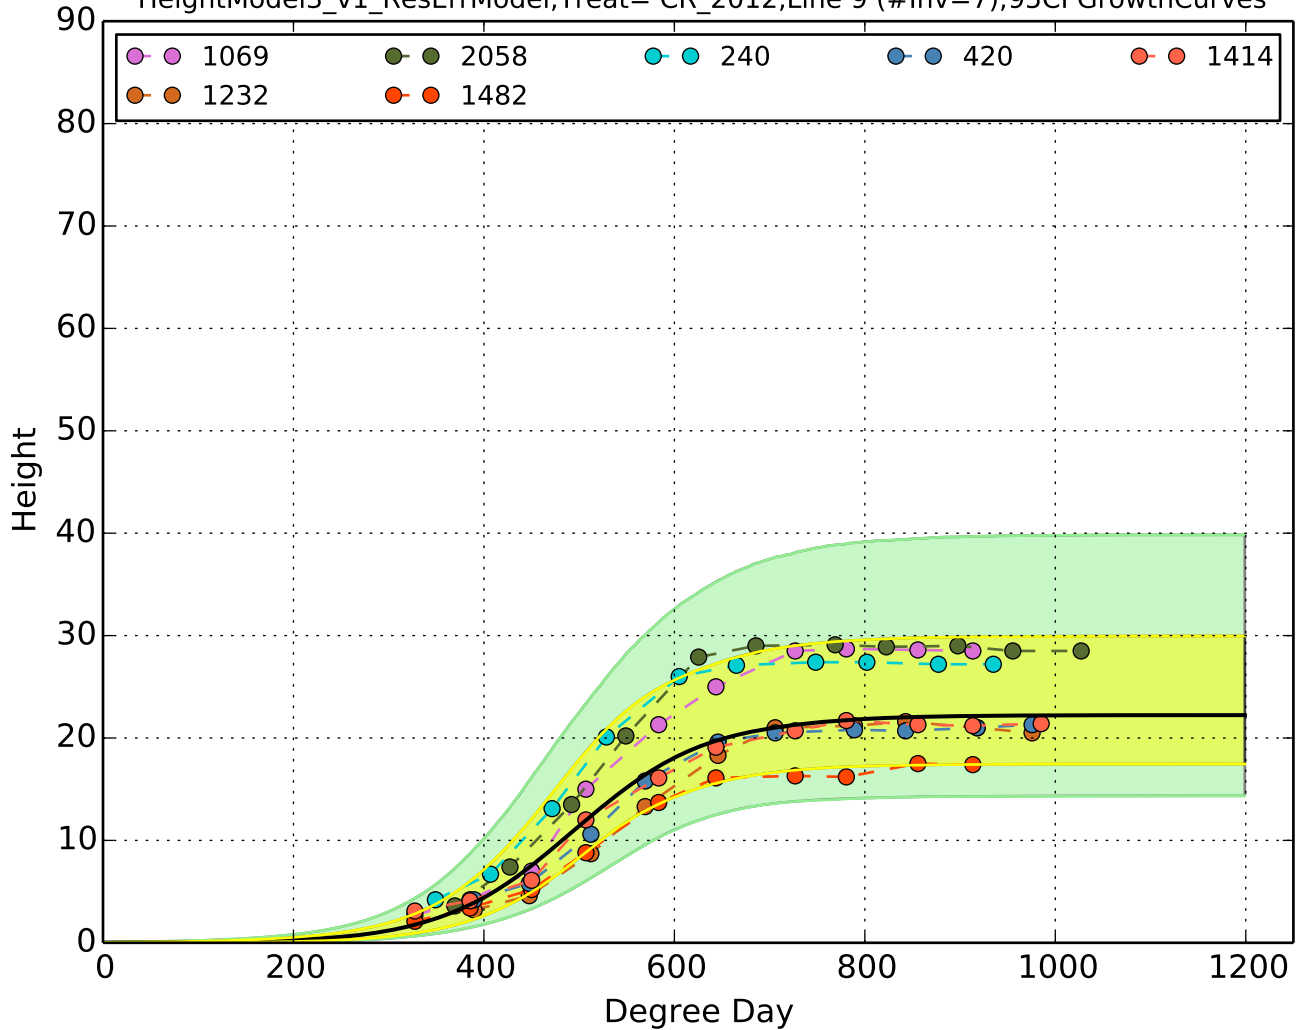

HeightModel3\_v1\_ResErrModel,Treat= CR\_2012,Line 12 (#Inv=12);95CI GrowthCurves

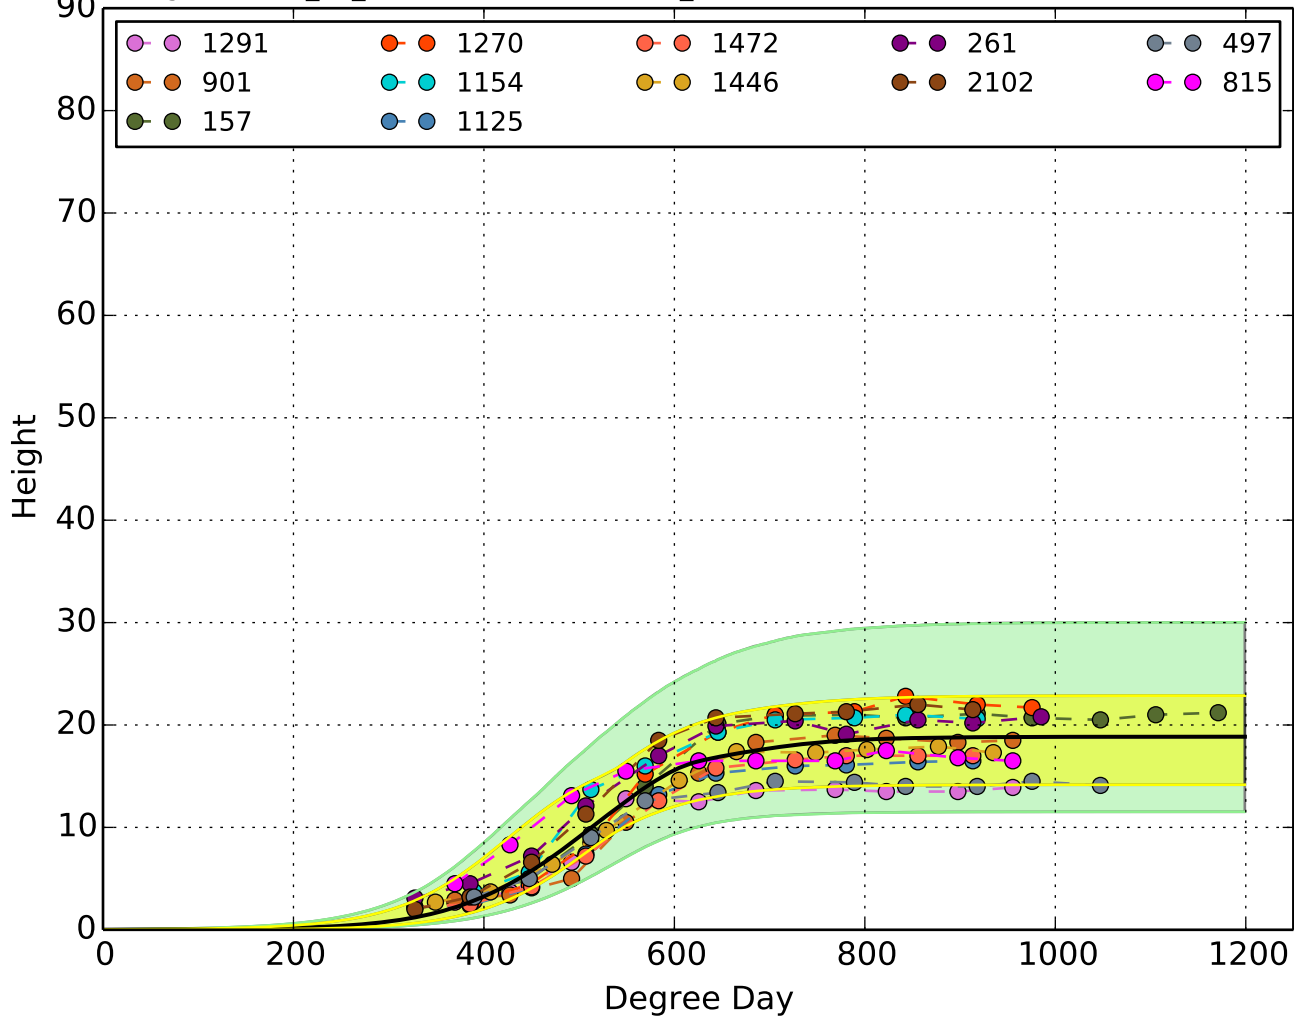

HeightModel3\_v1\_ResErrModel,Treat= CR\_2012,Line 15 (#Inv=6);95CI GrowthCurves

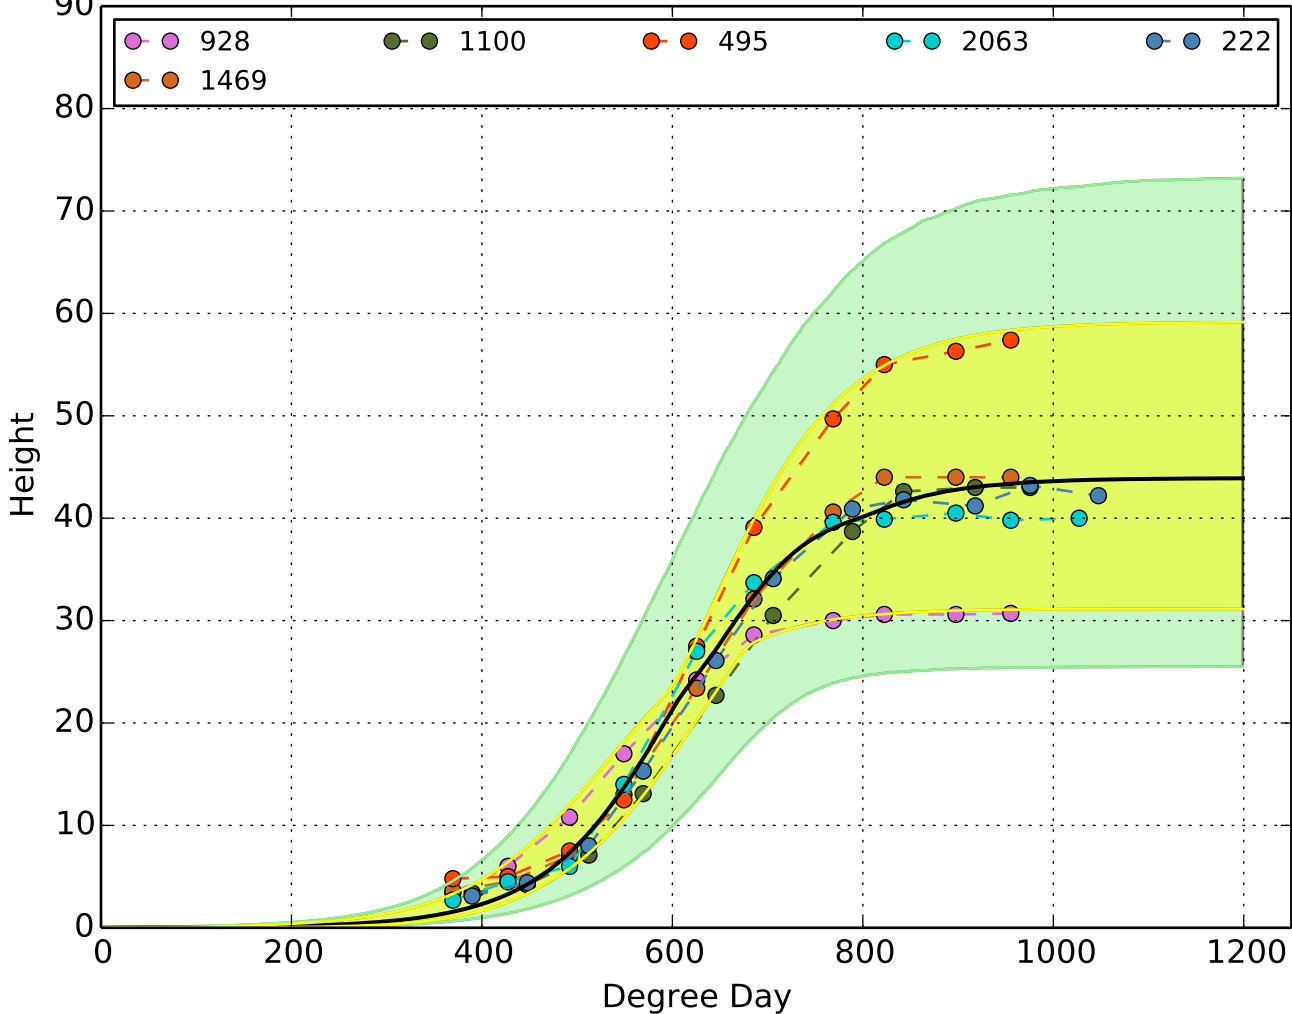

HeightModel3\_v1\_ResErrModel,Treat= CR\_2012,Line 16 (#Inv=6);95CI GrowthCurves

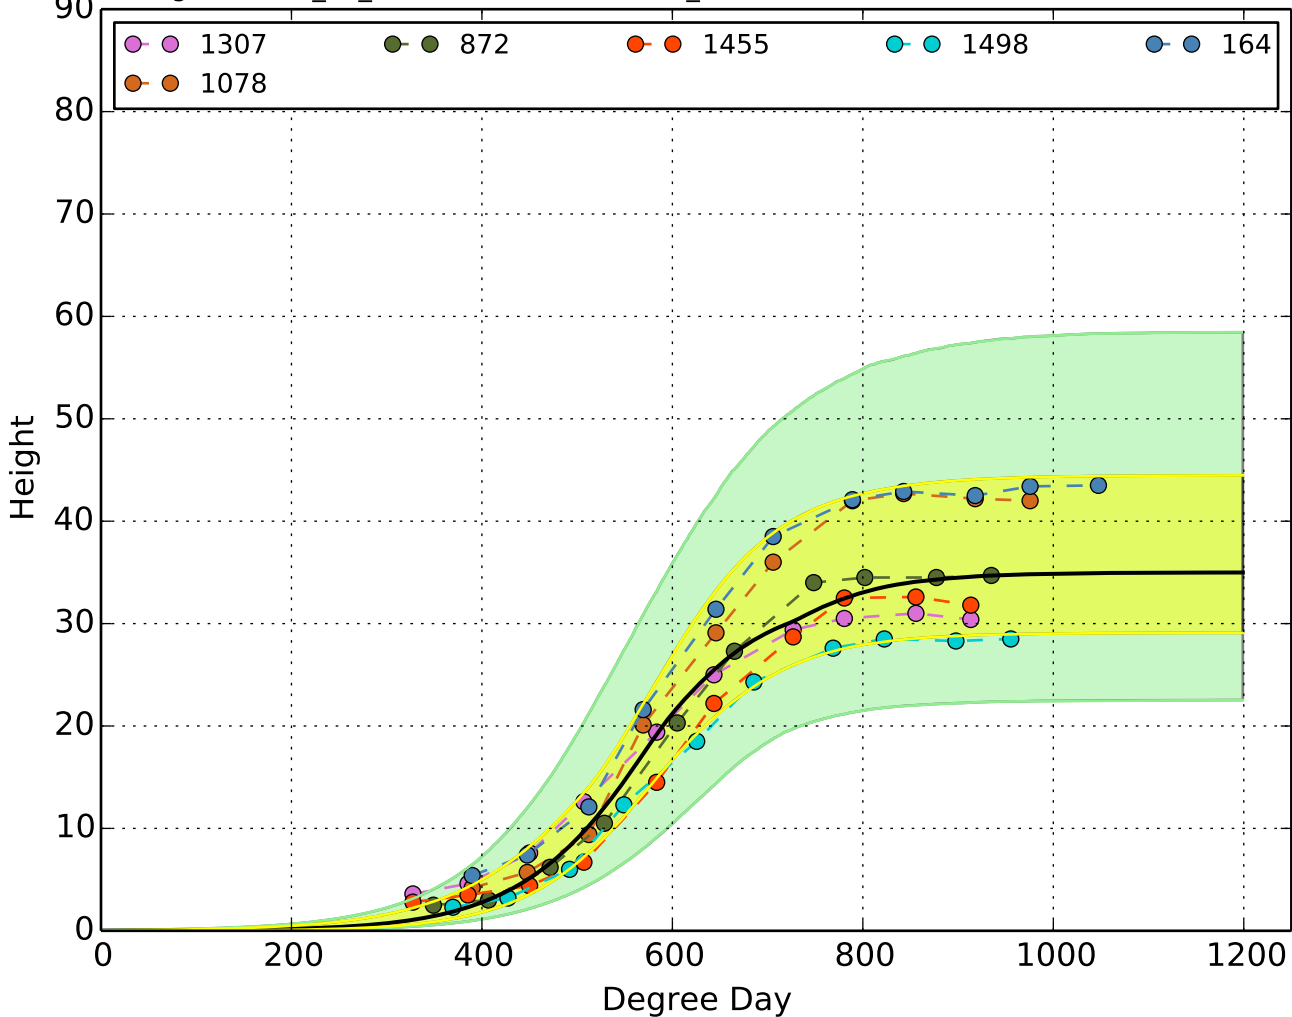



HeightModel3\_v1\_ResErrModel,Treat= CR\_2012,Line 21 (#Inv=6);95CI GrowthCurves

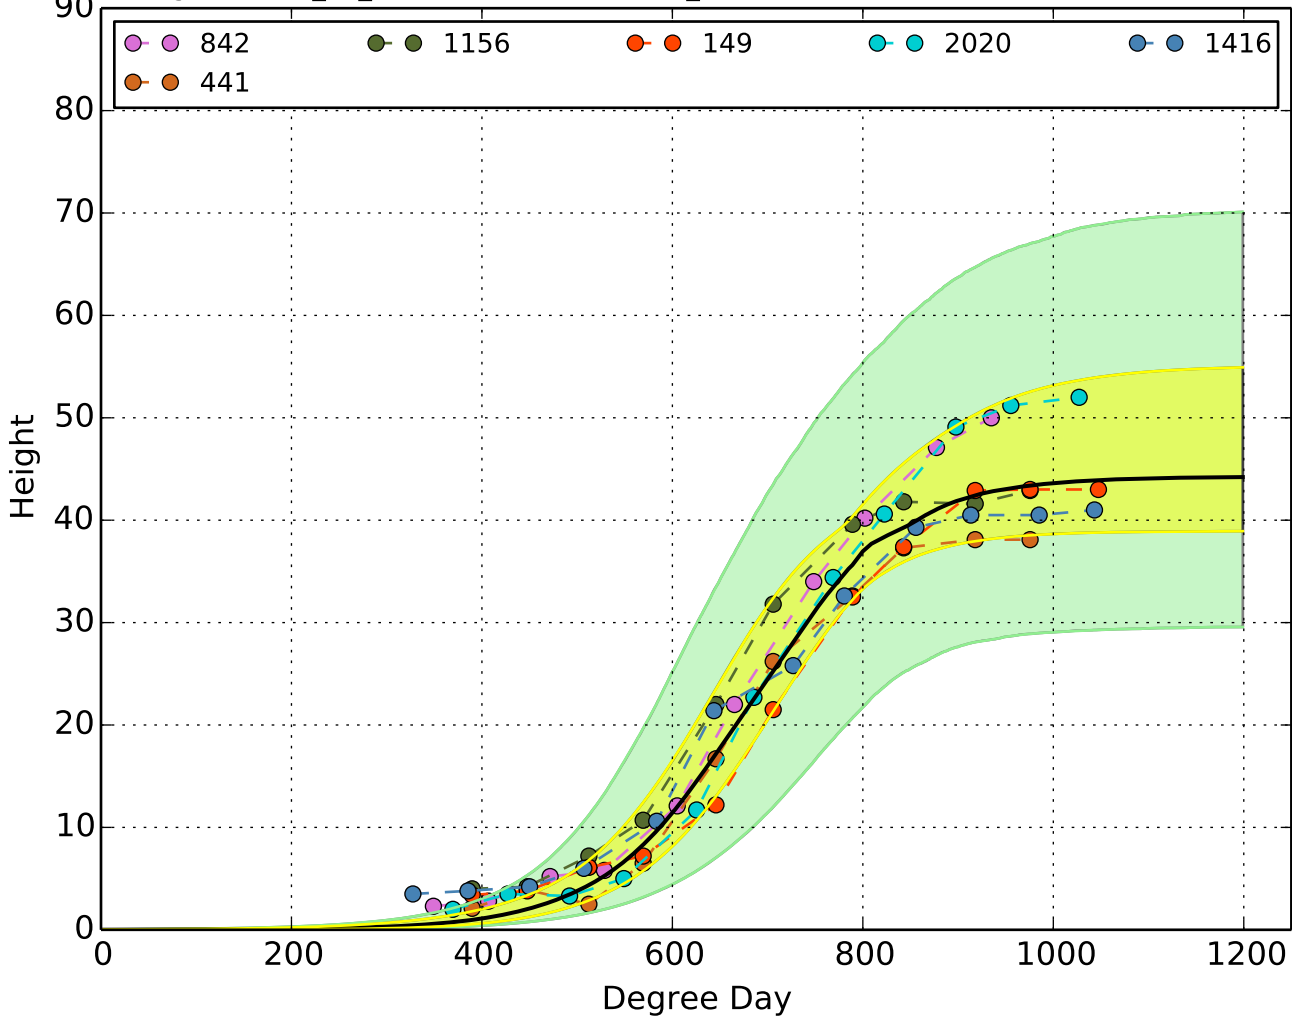

HeightModel3\_v1\_ResErrModel,Treat= CR\_2012,Line 23 (#Inv=4);95CI GrowthCurves

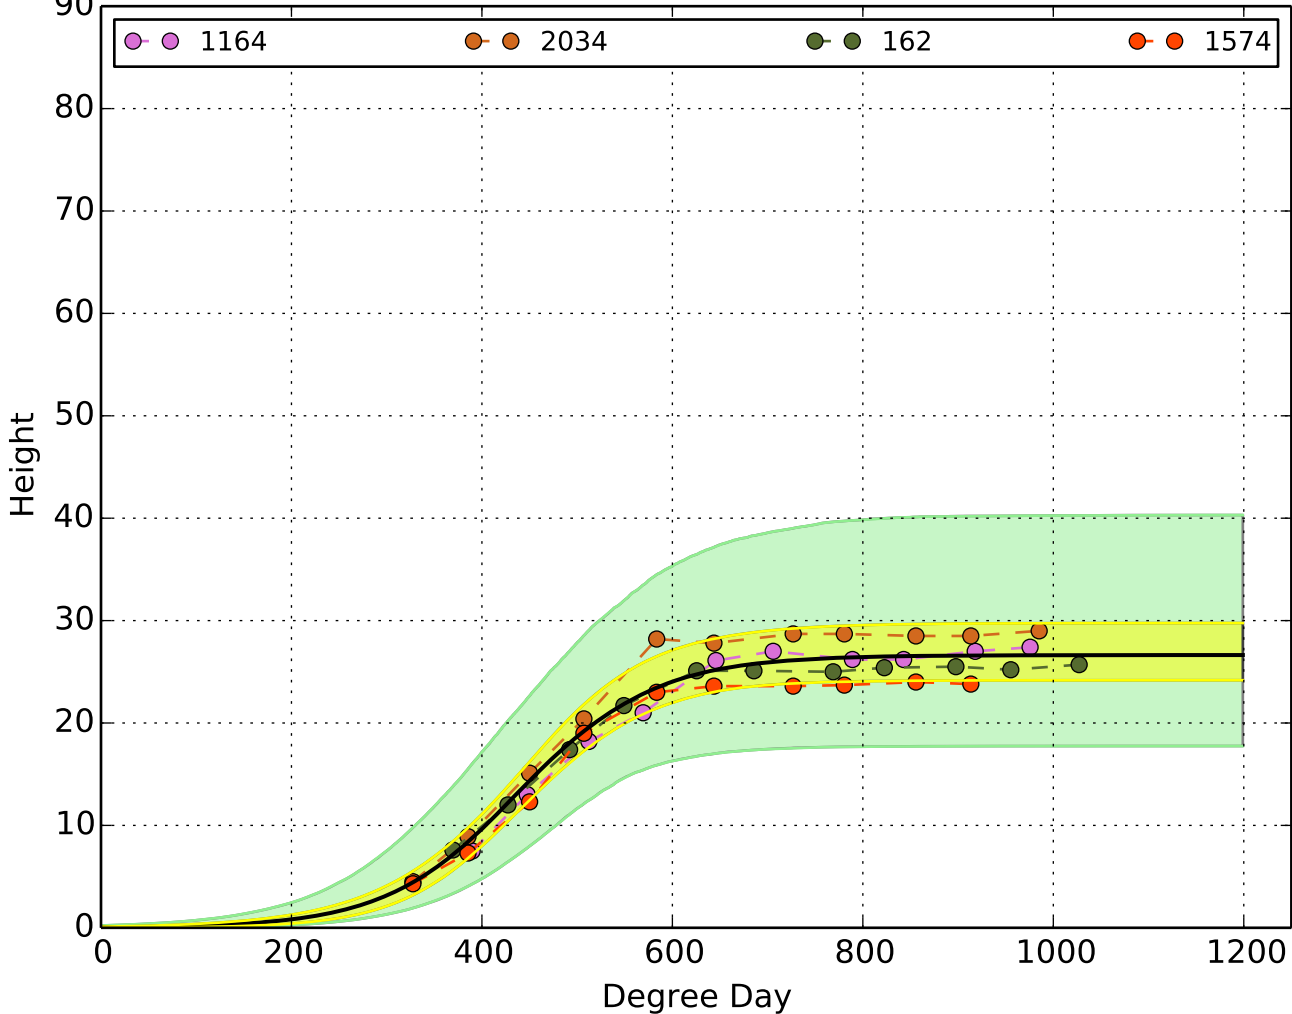

HeightModel3\_v1\_ResErrModel,Treat= CR\_2012,Line 25 (#Inv=6);95CI GrowthCurves

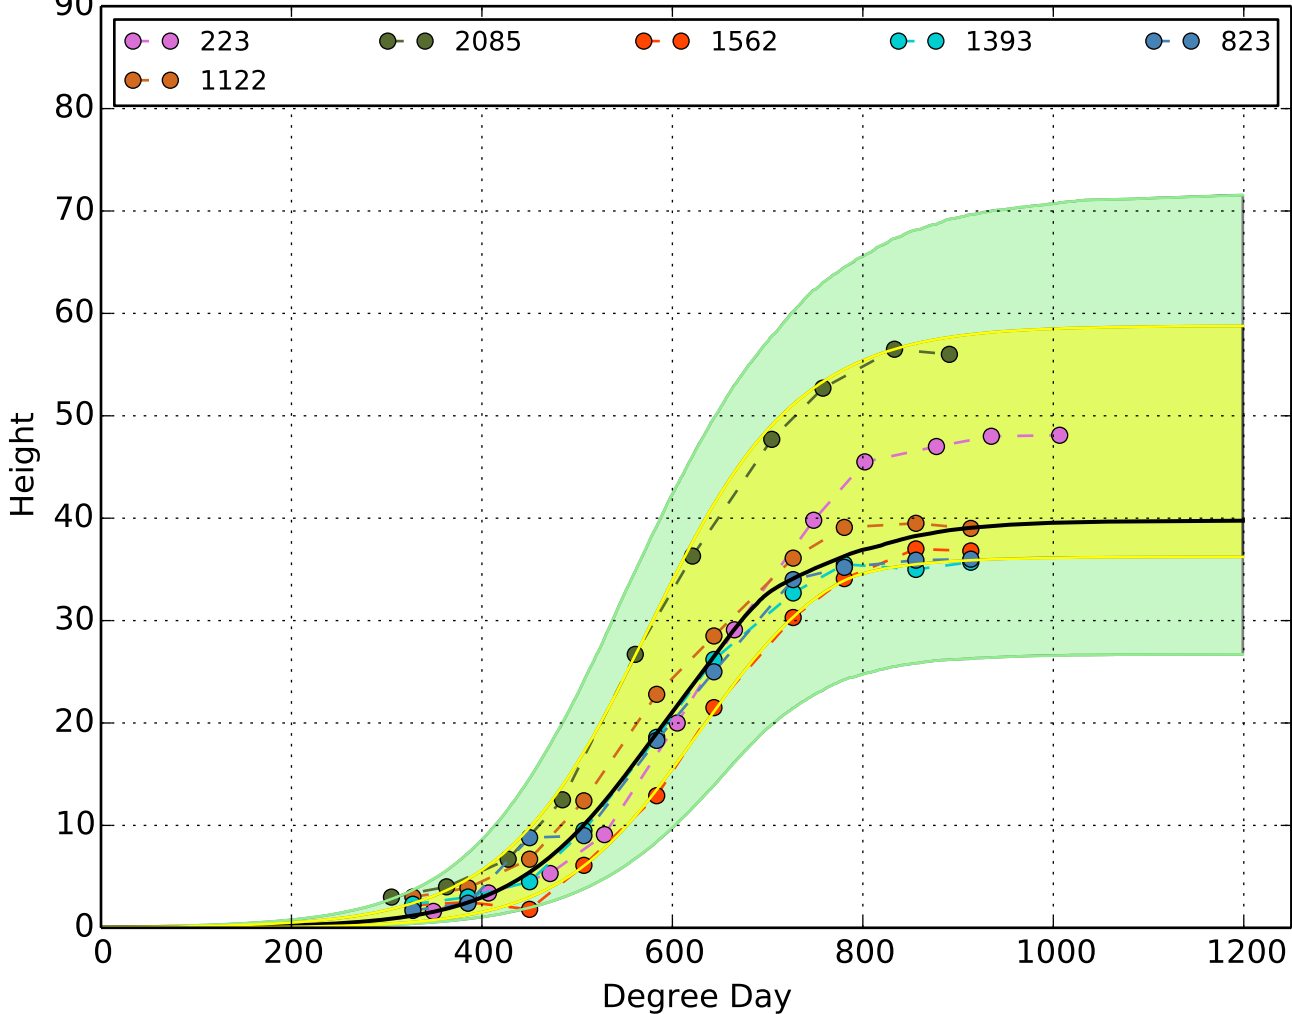

HeightModel3\_v1\_ResErrModel,Treat= CR\_2012,Line 30 (#Inv=8);95CI GrowthCurves

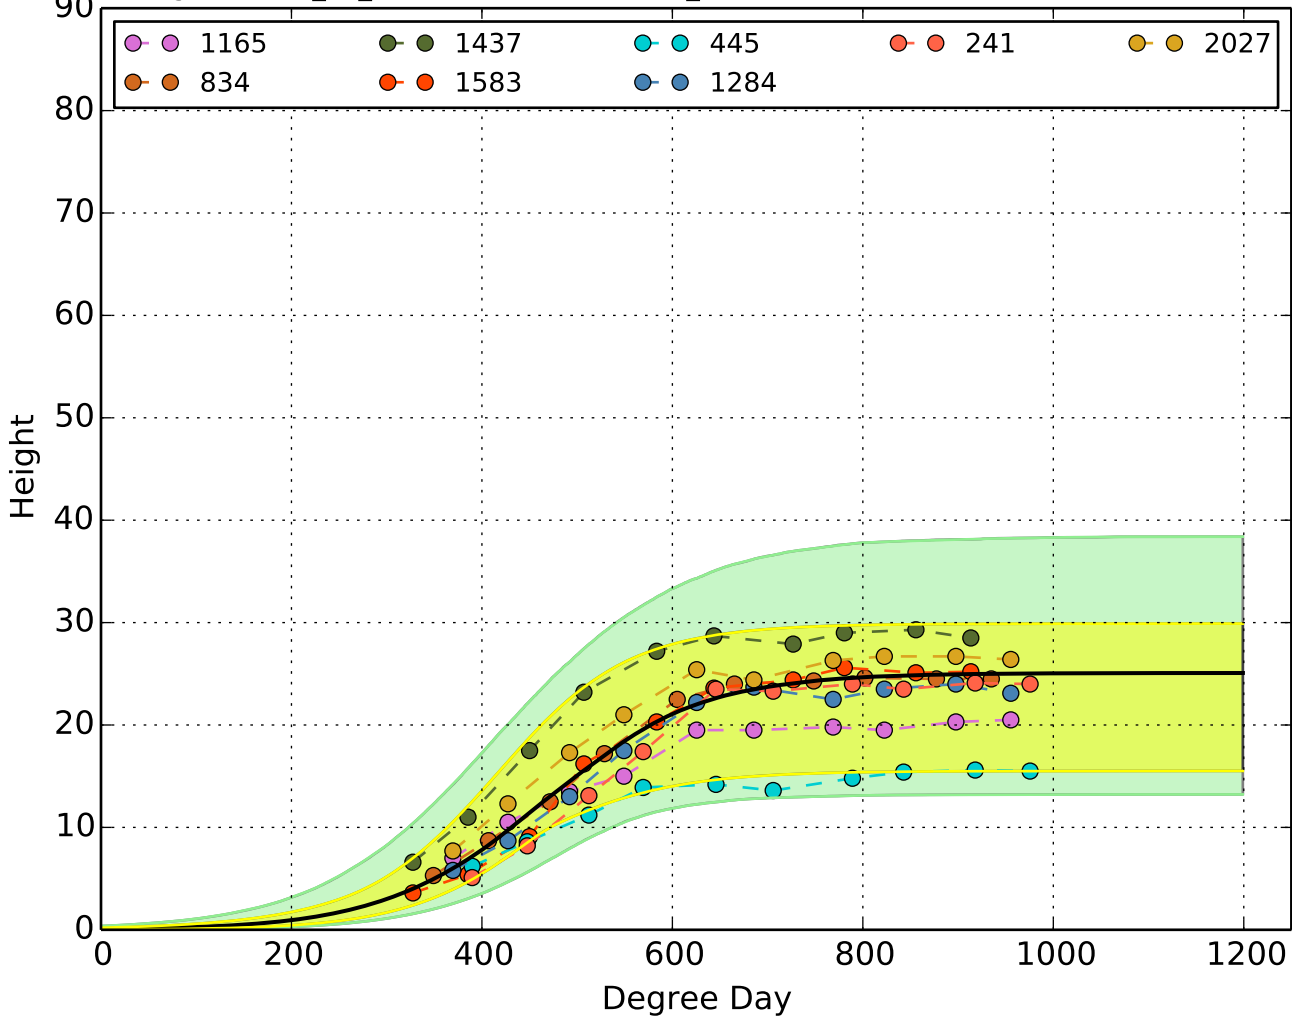

HeightModel3\_v1\_ResErrModel,Treat= CR\_2012,Line 31 (#Inv=6);95CI GrowthCurves

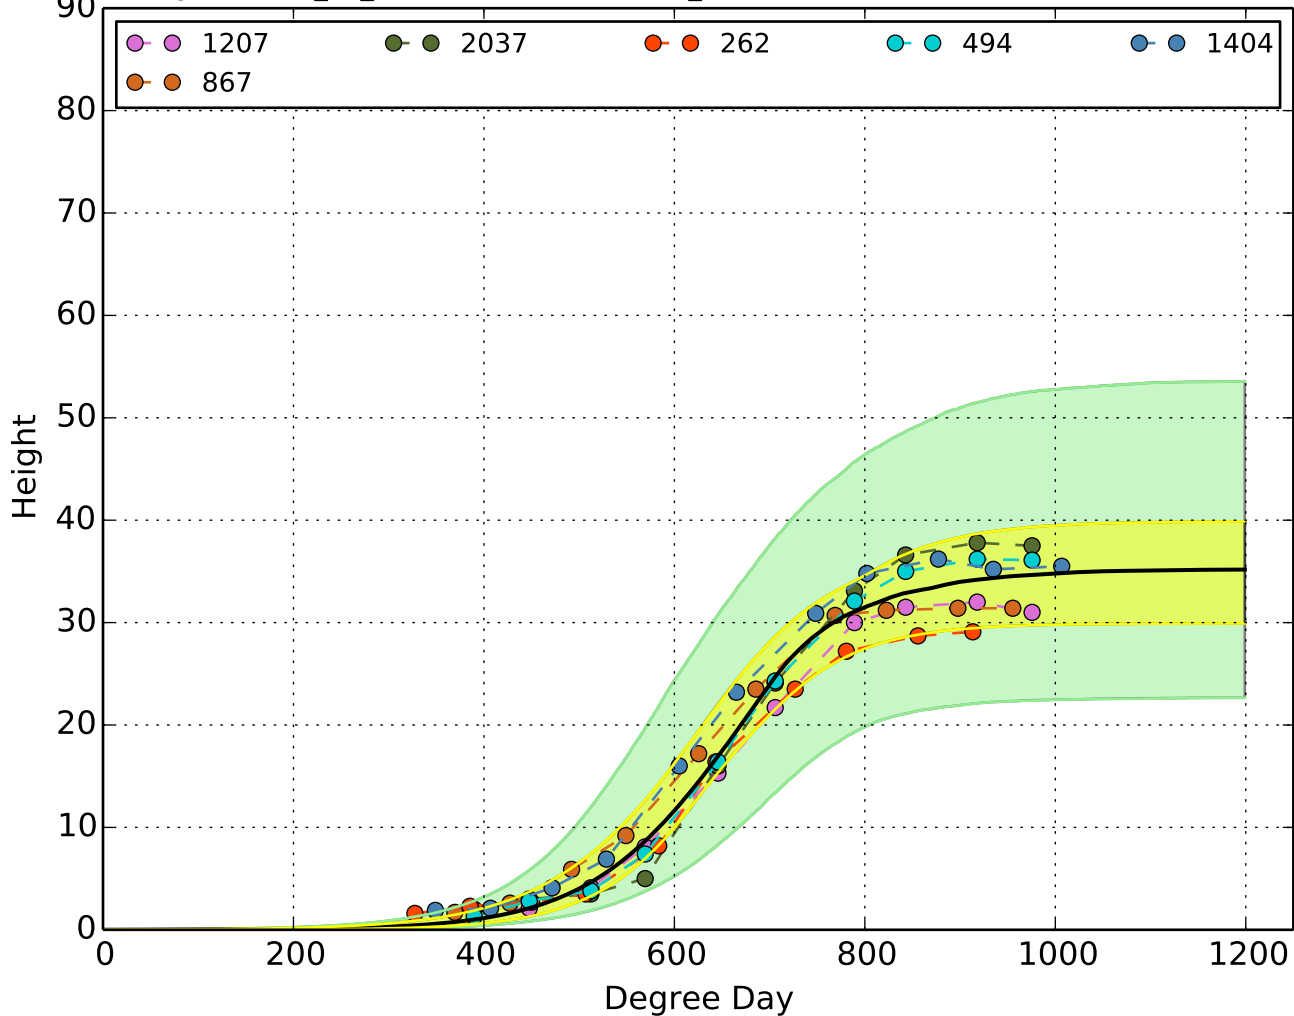

HeightModel3\_v1\_ResErrModel,Treat= CR\_2012,Line 36 (#Inv=13);95CI GrowthCurves

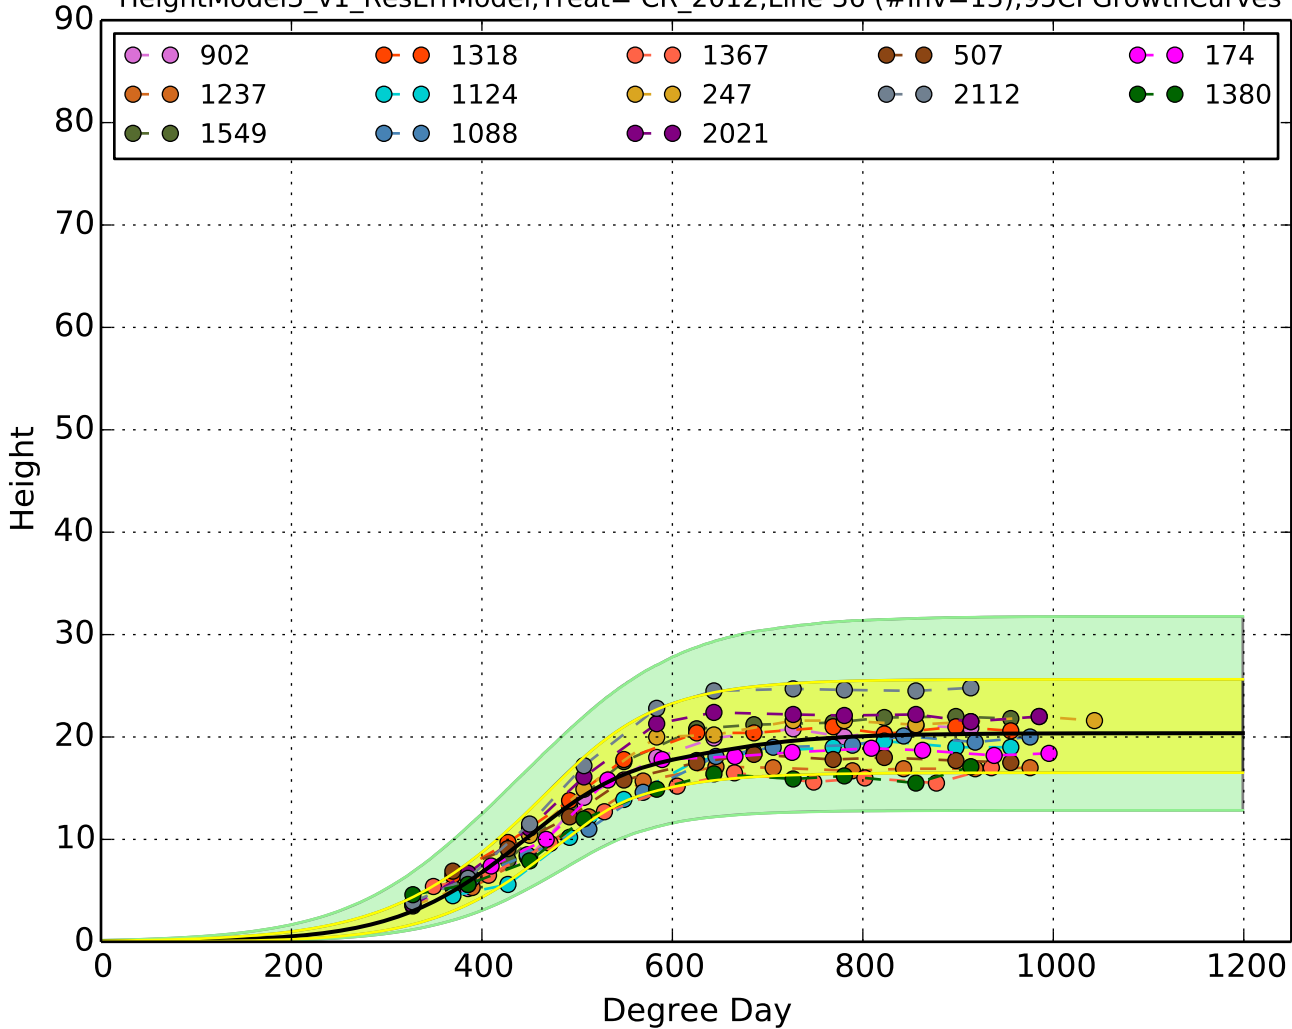

HeightModel3\_v1\_ResErrModel,Treat= CR\_2012,Line 39 (#Inv=4);95CI GrowthCurves

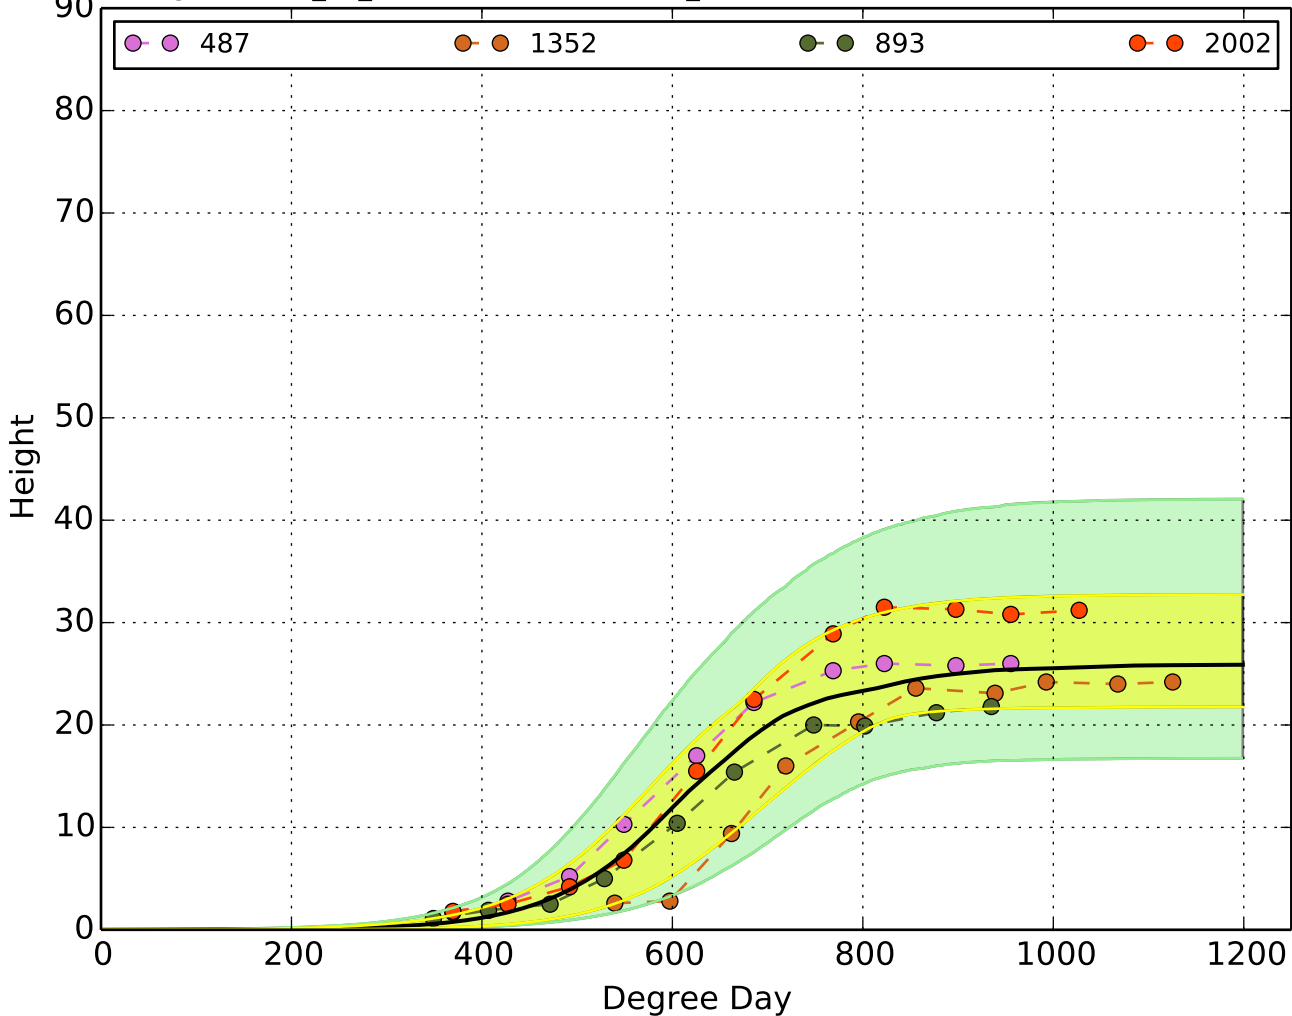

HeightModel3\_v1\_ResErrModel,Treat= CR\_2012,Line 42 (#Inv=7);95CI GrowthCurves

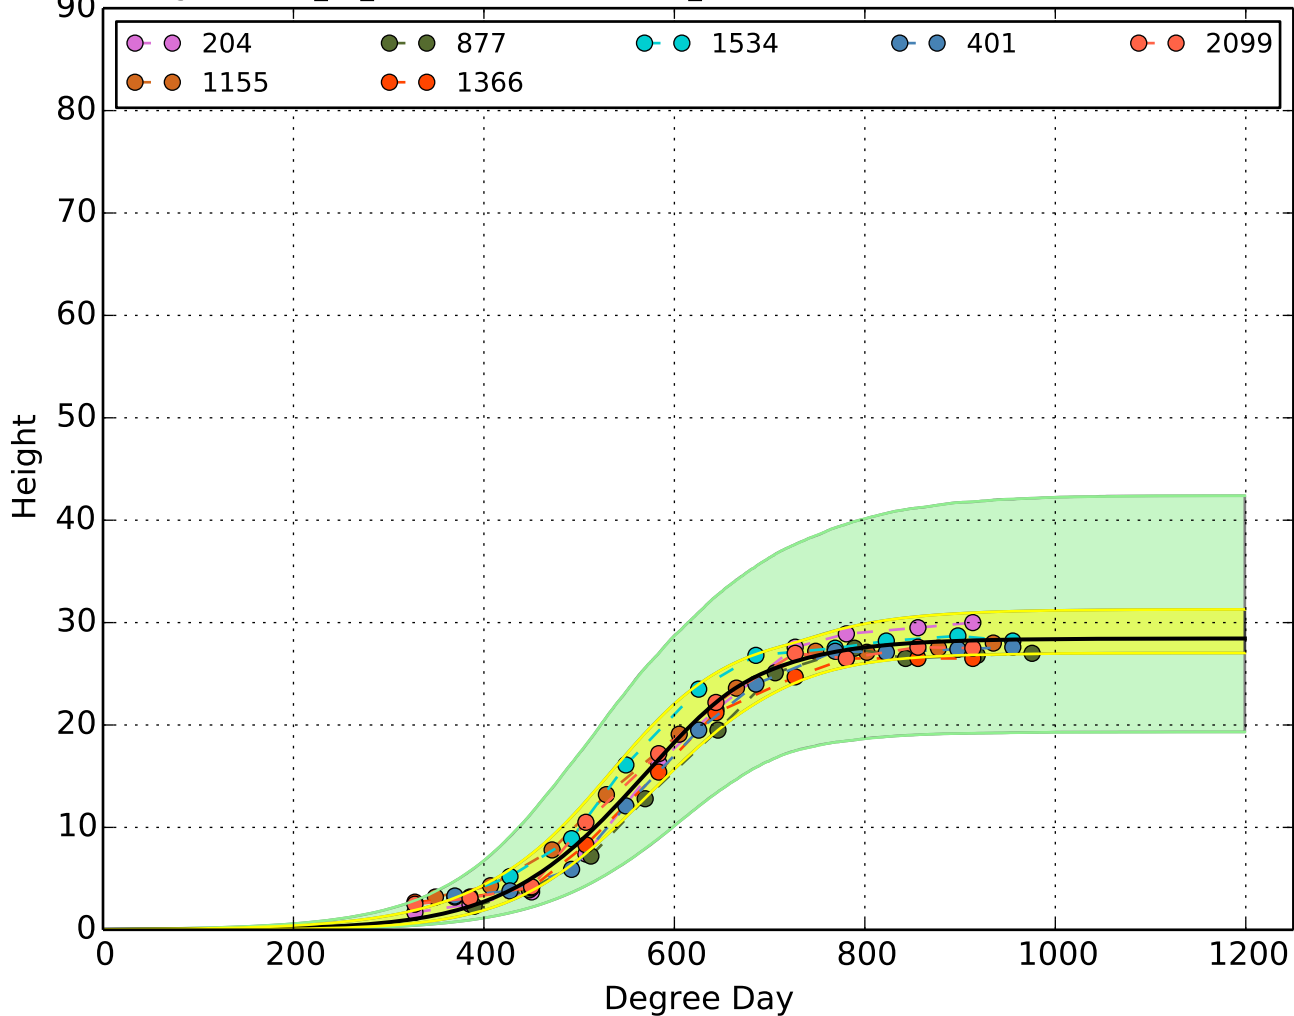



HeightModel3\_v1\_ResErrModel,Treat= CR\_2012,Line 46 (#Inv=5);95CI GrowthCurves

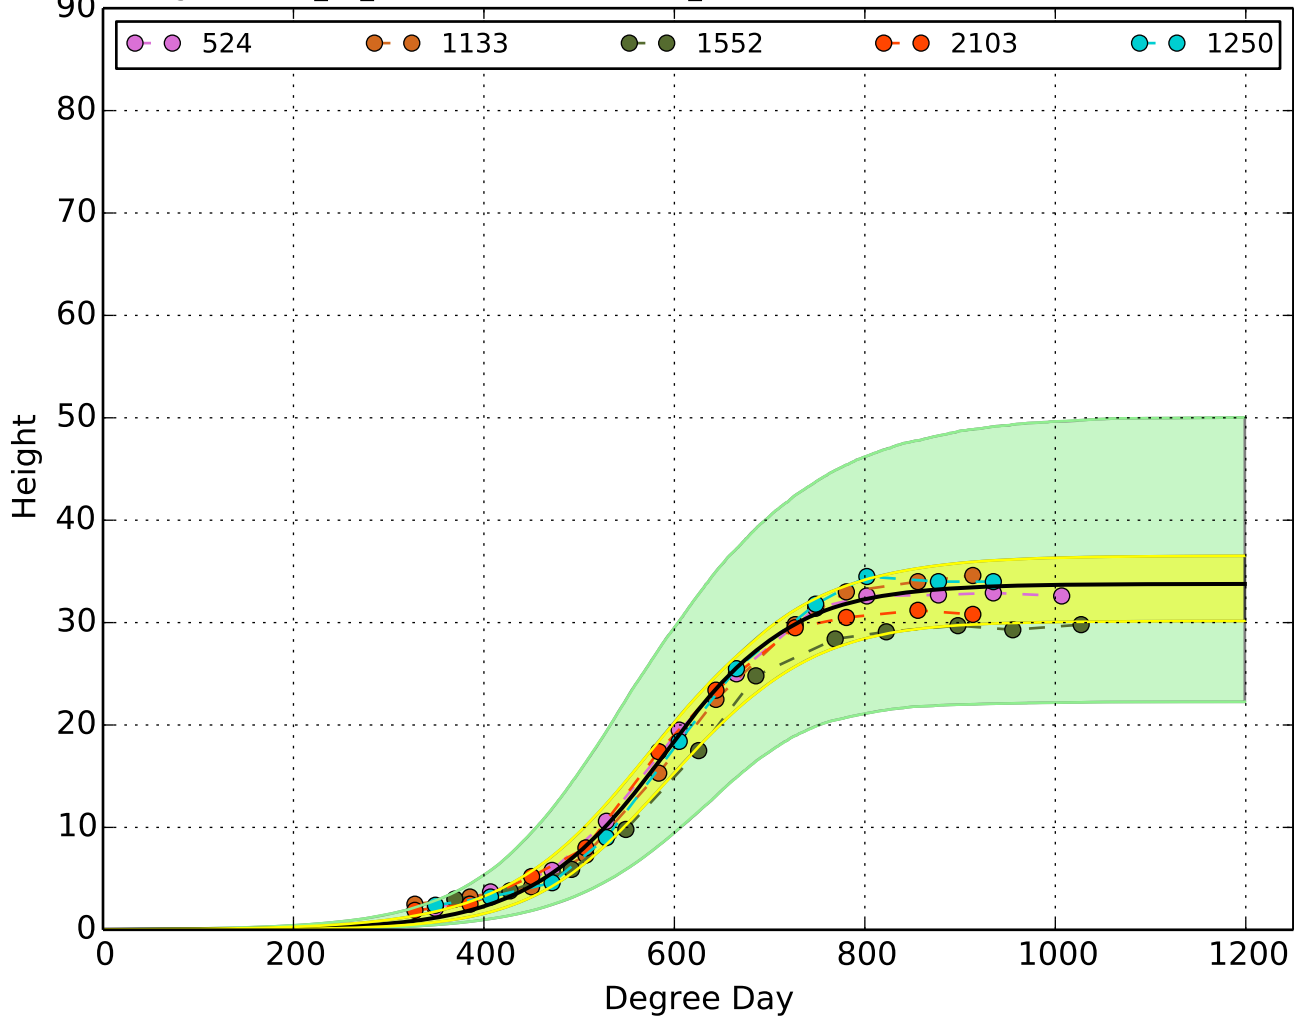

HeightModel3\_v1\_ResErrModel,Treat= CR\_2012,Line 53 (#Inv=13);95CI GrowthCurves

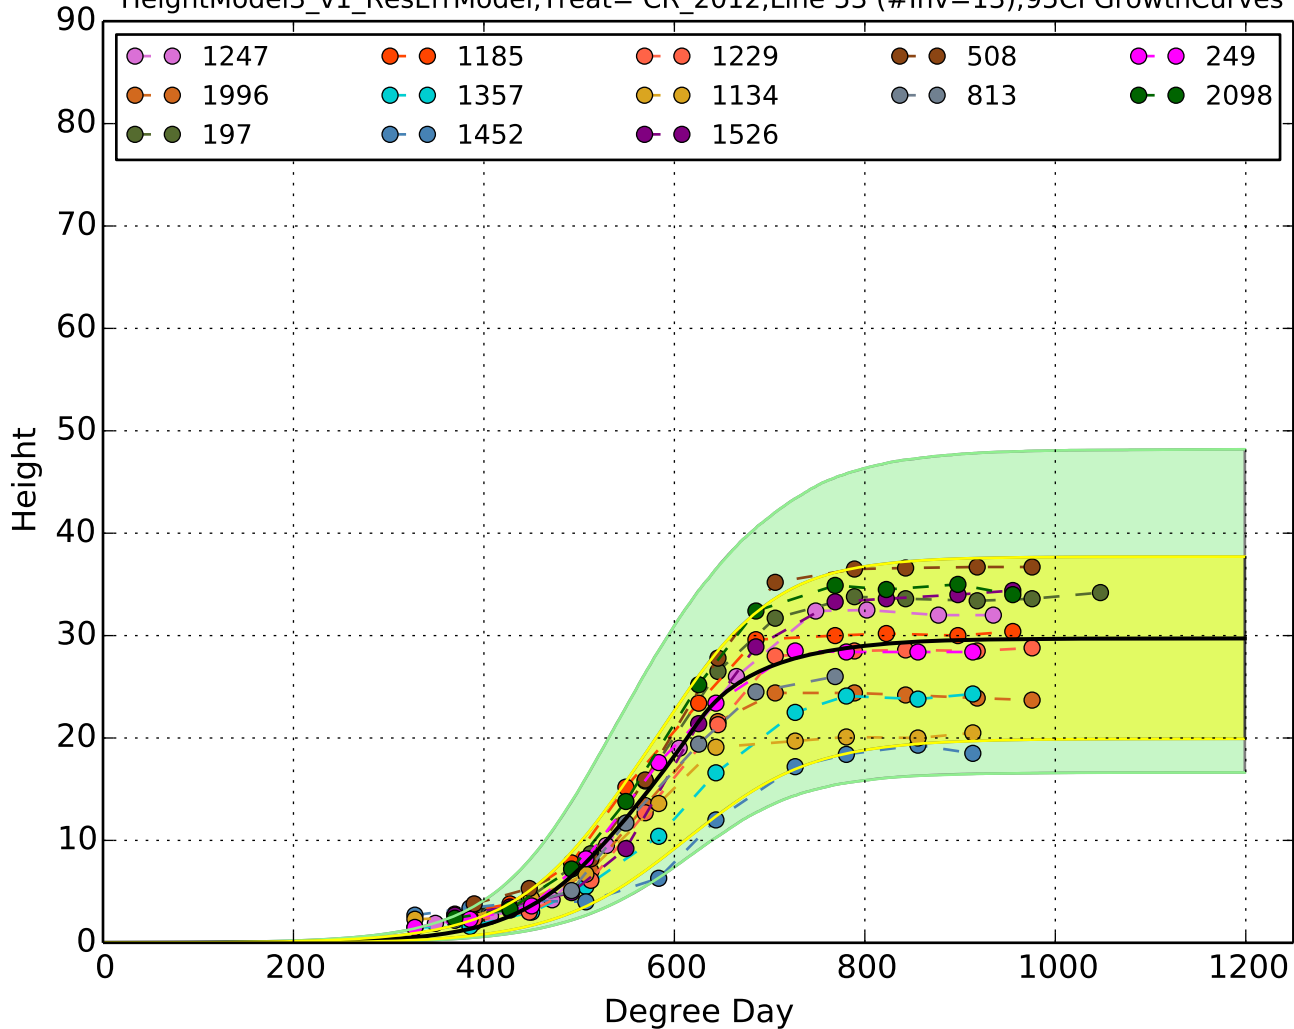

HeightModel3\_v1\_ResErrModel,Treat= CR\_2012,Line 60 (#Inv=7);95CI GrowthCurves

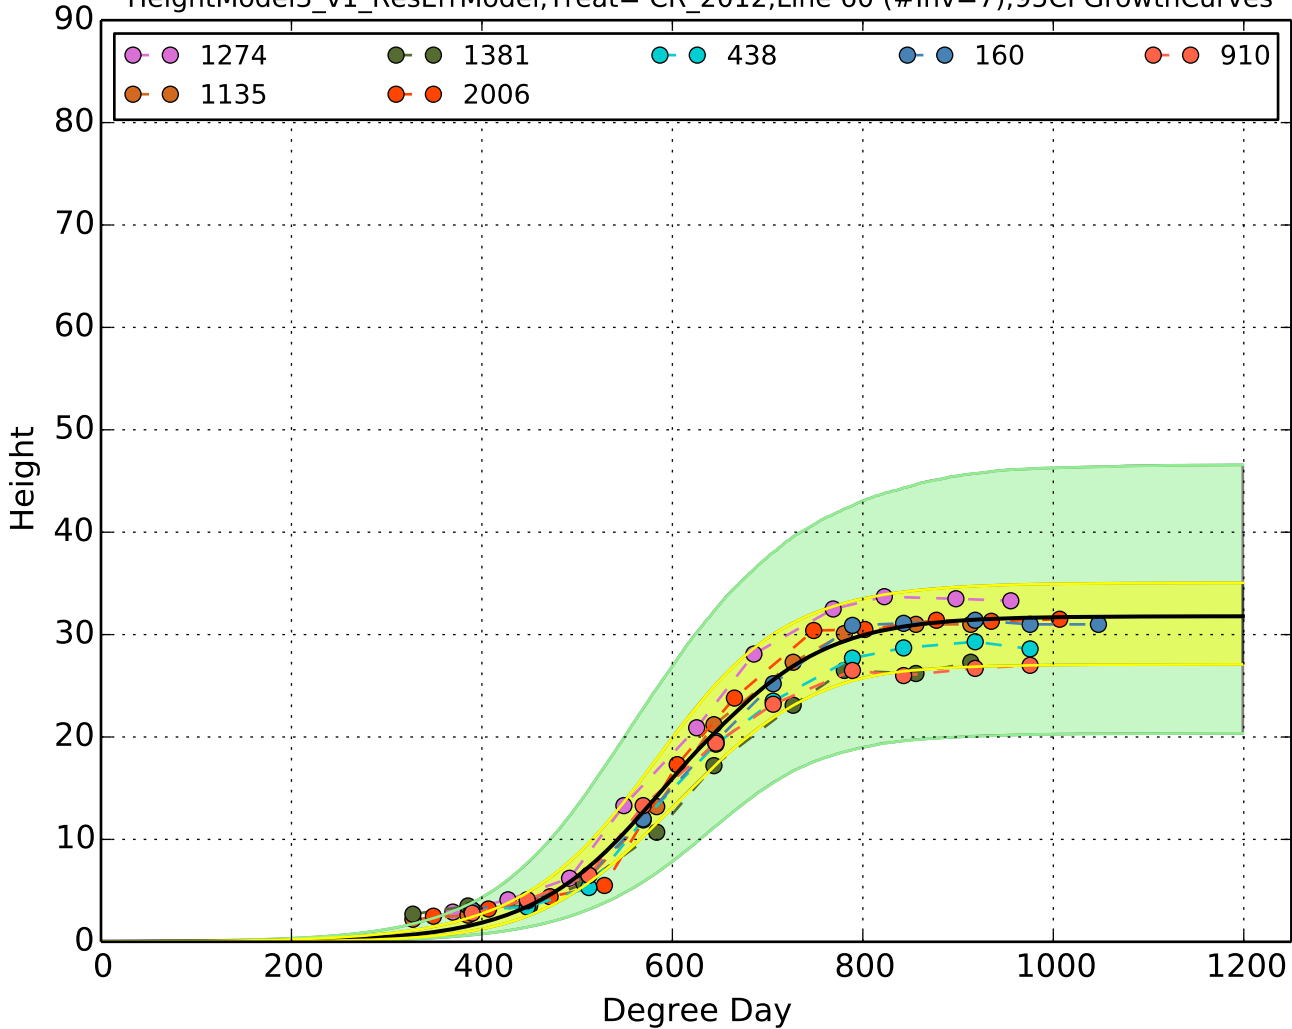

HeightModel3\_v1\_ResErrModel,Treat= CR\_2012,Line 63 (#Inv=8);95CI GrowthCurves

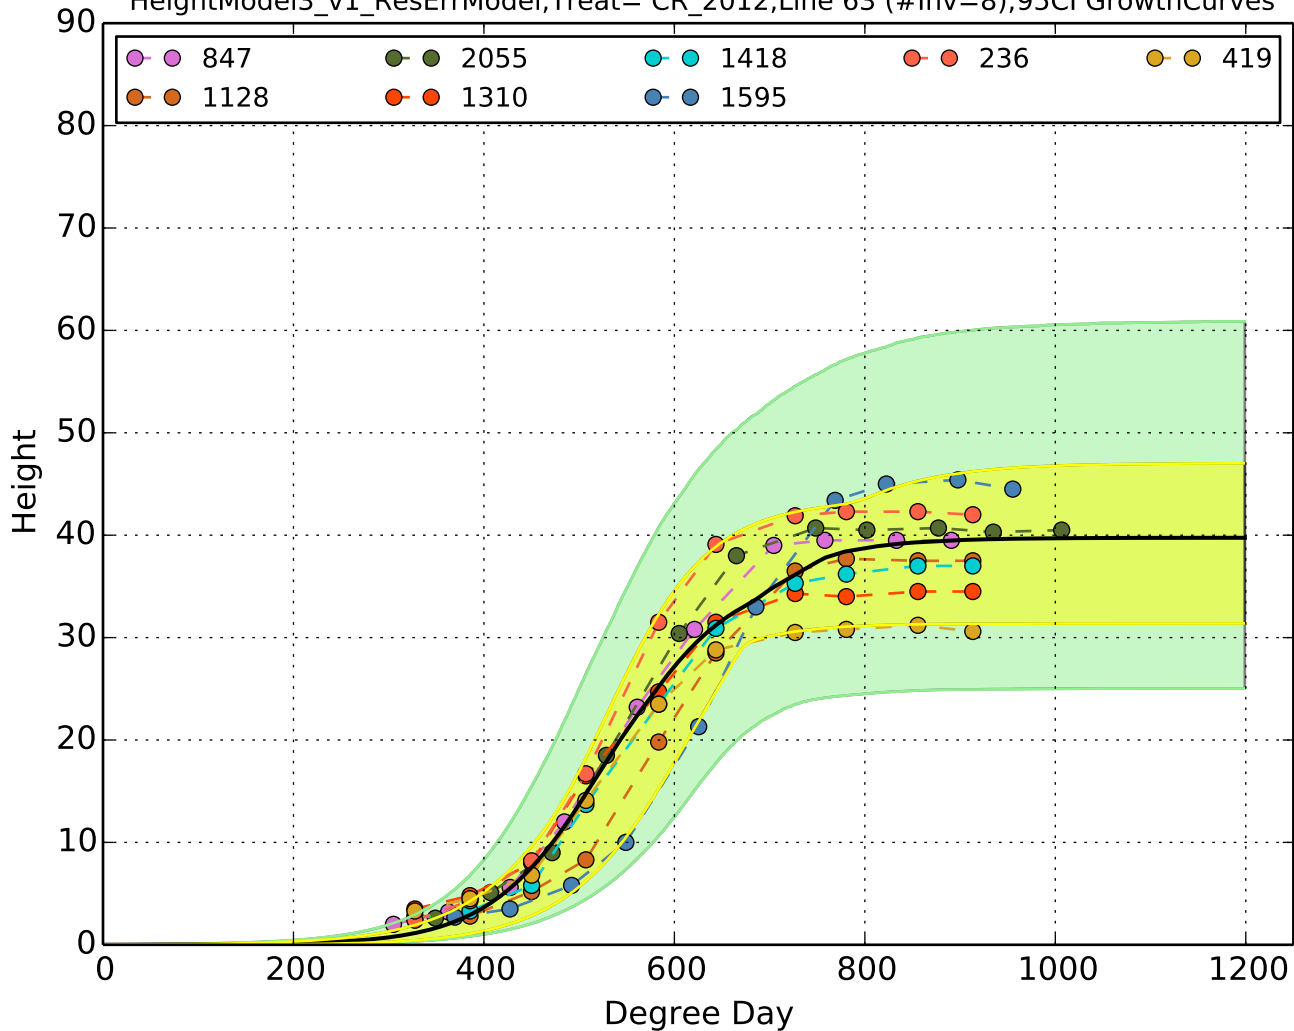

HeightModel3\_v1\_ResErrModel,Treat= CR\_2012,Line 65 (#Inv=5);95CI GrowthCurves

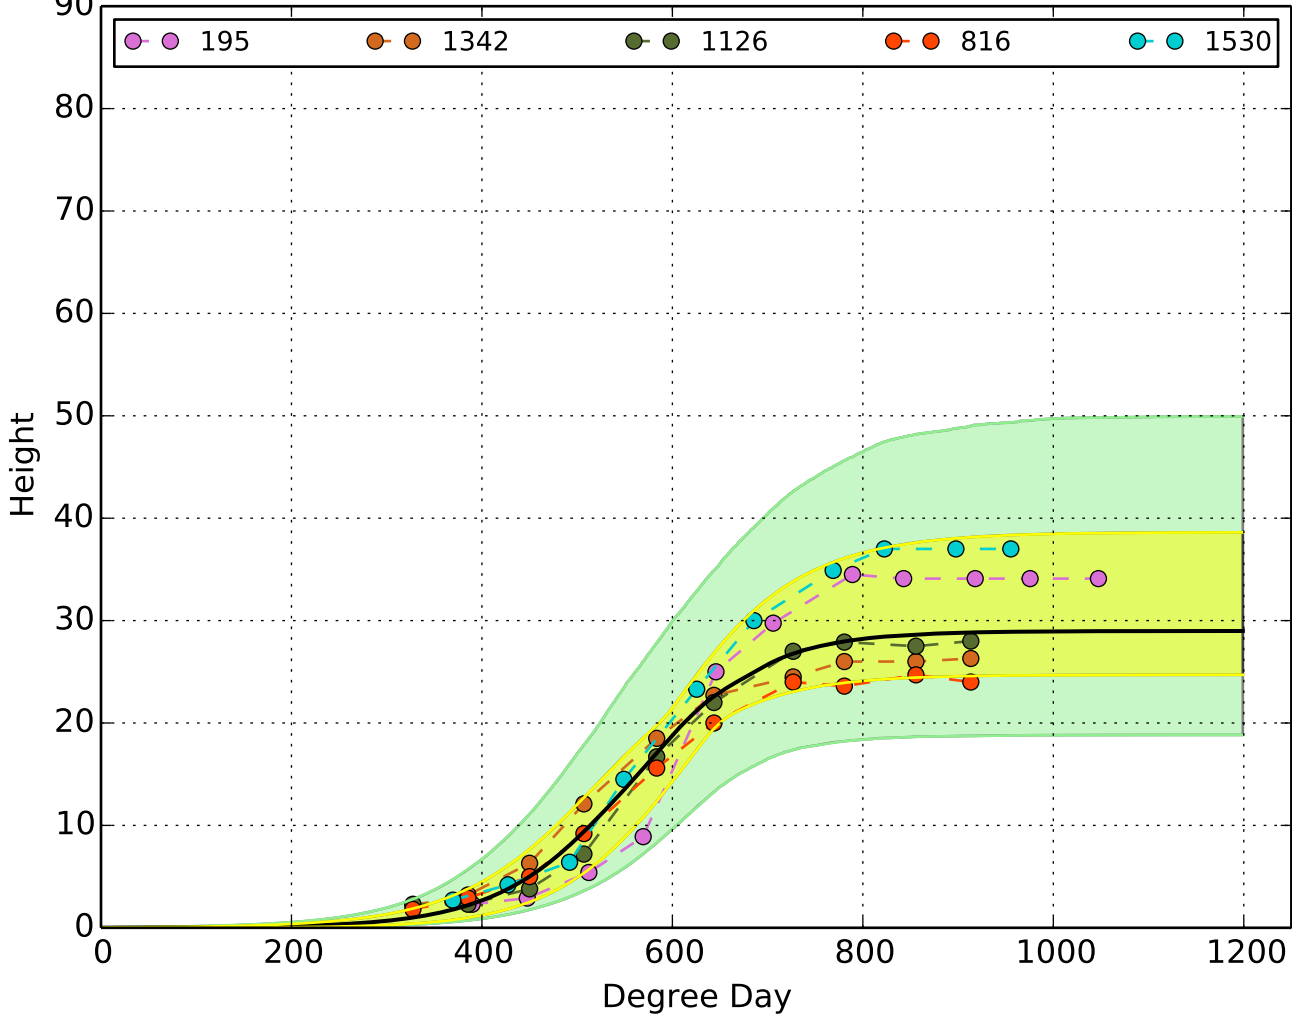

HeightModel3\_v1\_ResErrModel,Treat= CR\_2012,Line 66 (#Inv=7);95CI GrowthCurves

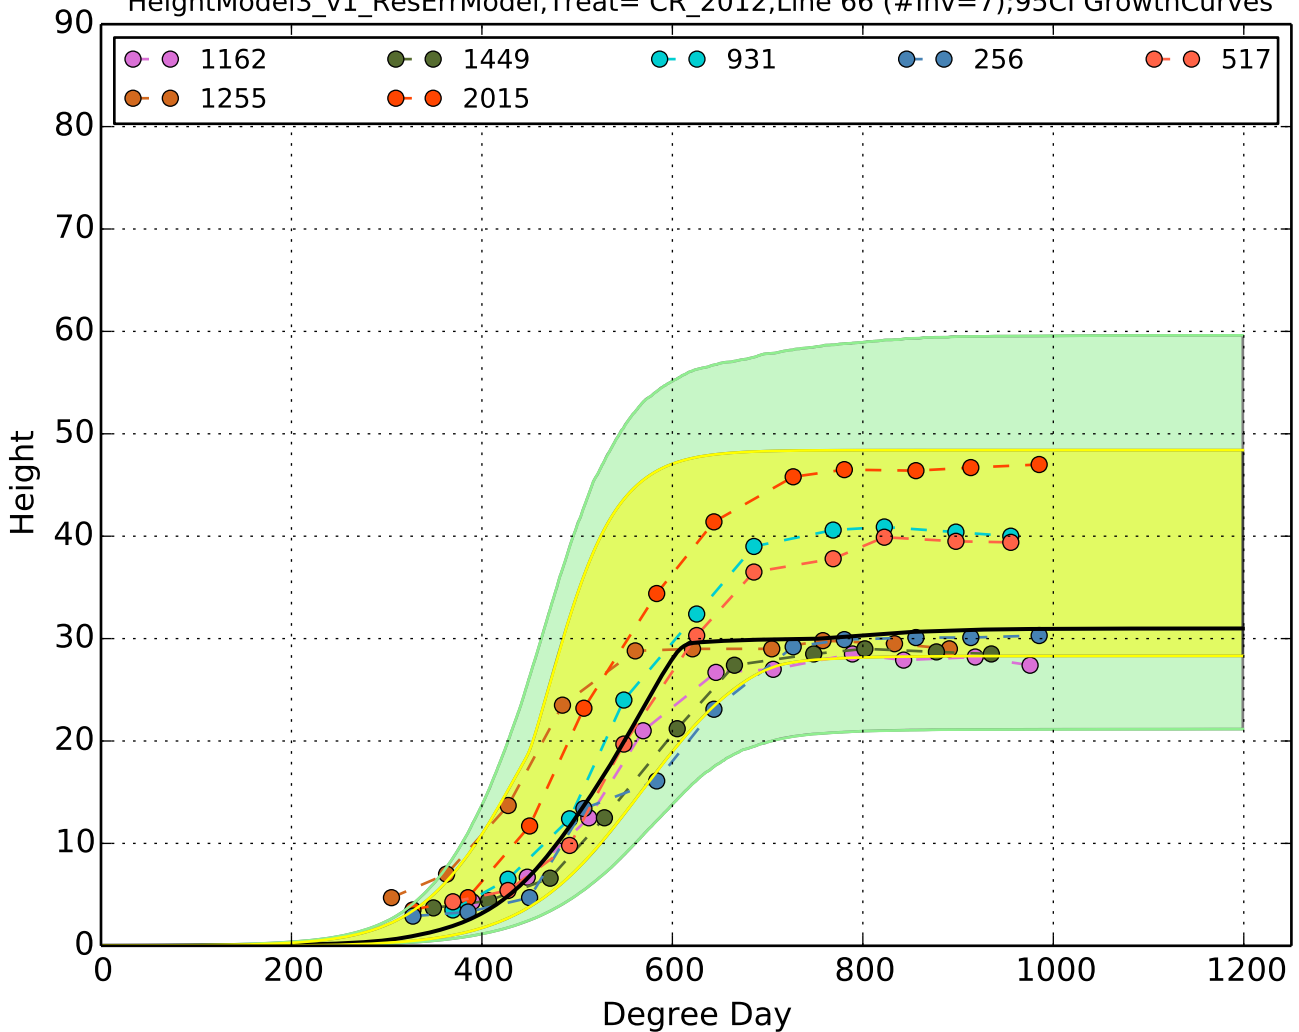

HeightModel3\_v1\_ResErrModel,Treat= CR\_2012,Line 69 (#Inv=6);95CI GrowthCurves

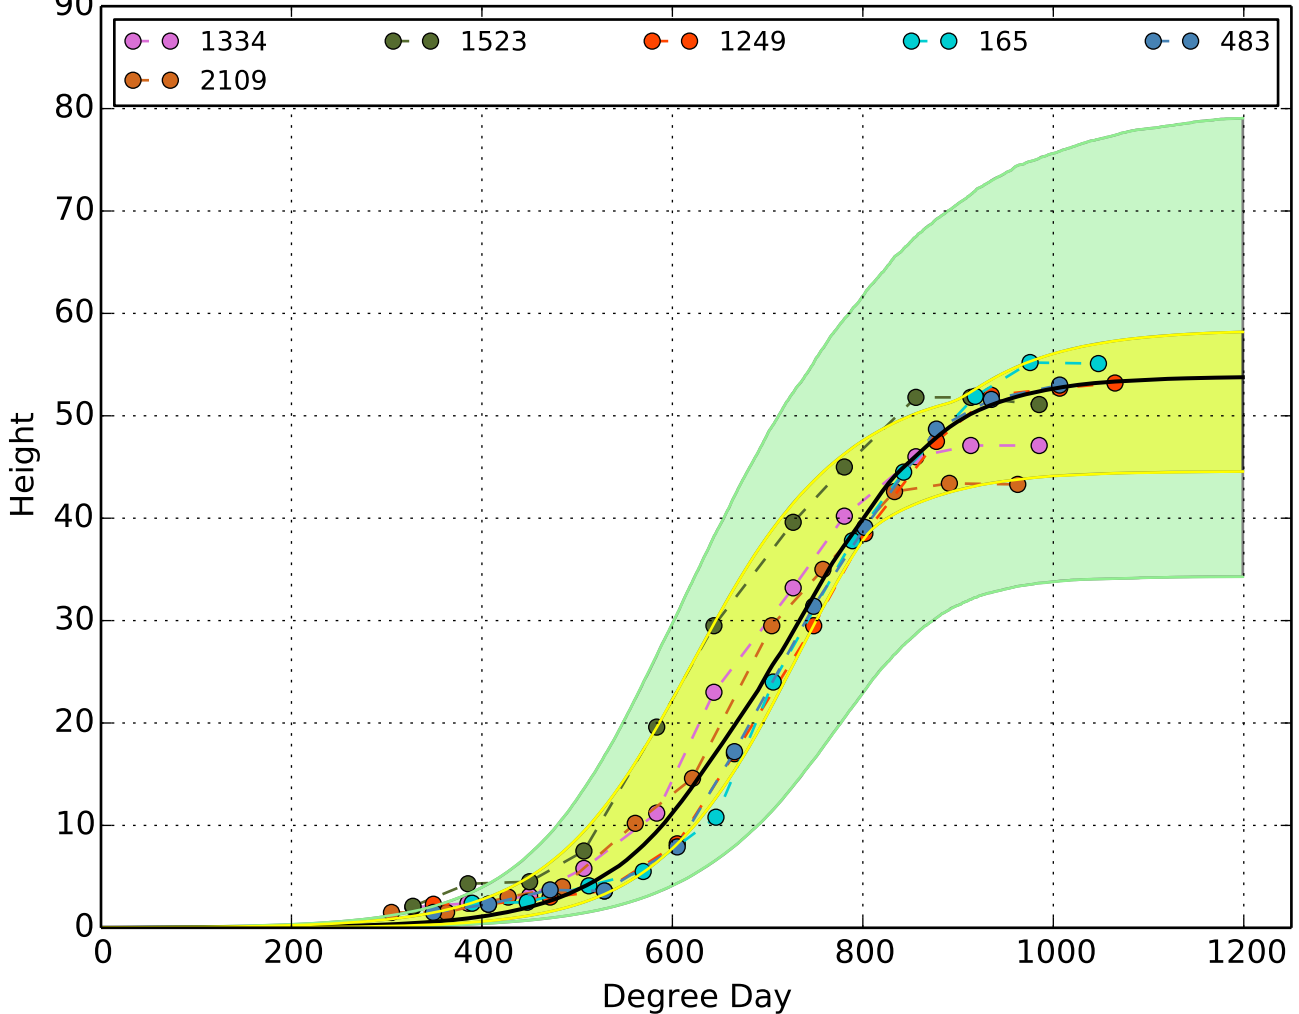

HeightModel3\_v1\_ResErrModel,Treat= CR\_2012,Line 70 (#Inv=7);95CI GrowthCurves

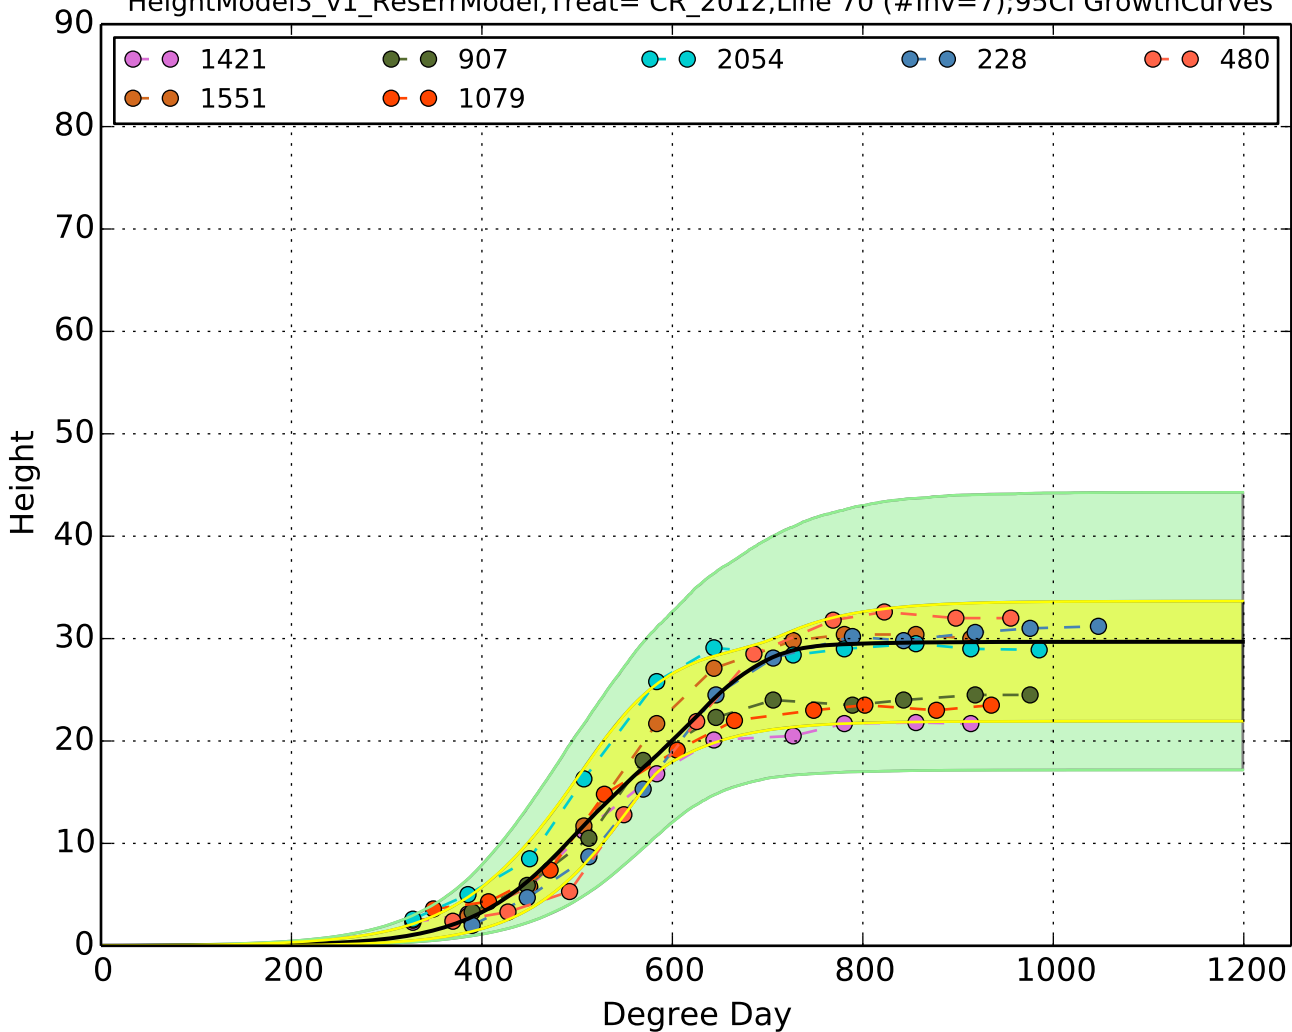



HeightModel3\_v1\_ResErrModel,Treat= CR\_2012,Line 73 (#Inv=8);95CI GrowthCurves

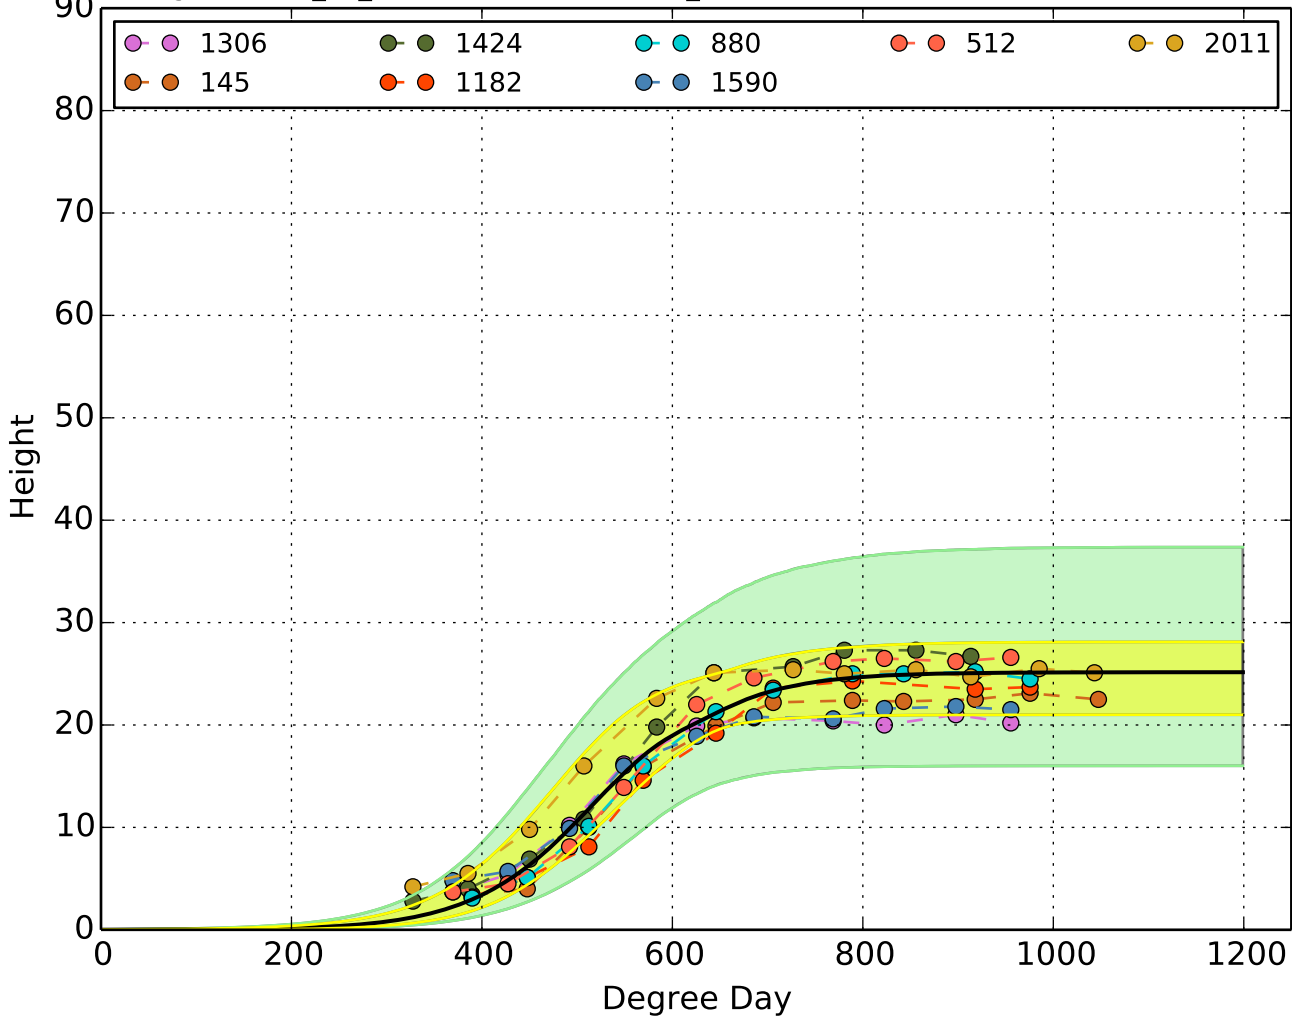

HeightModel3\_v1\_ResErrModel,Treat= CR\_2012,Line 76 (#Inv=7);95CI GrowthCurves

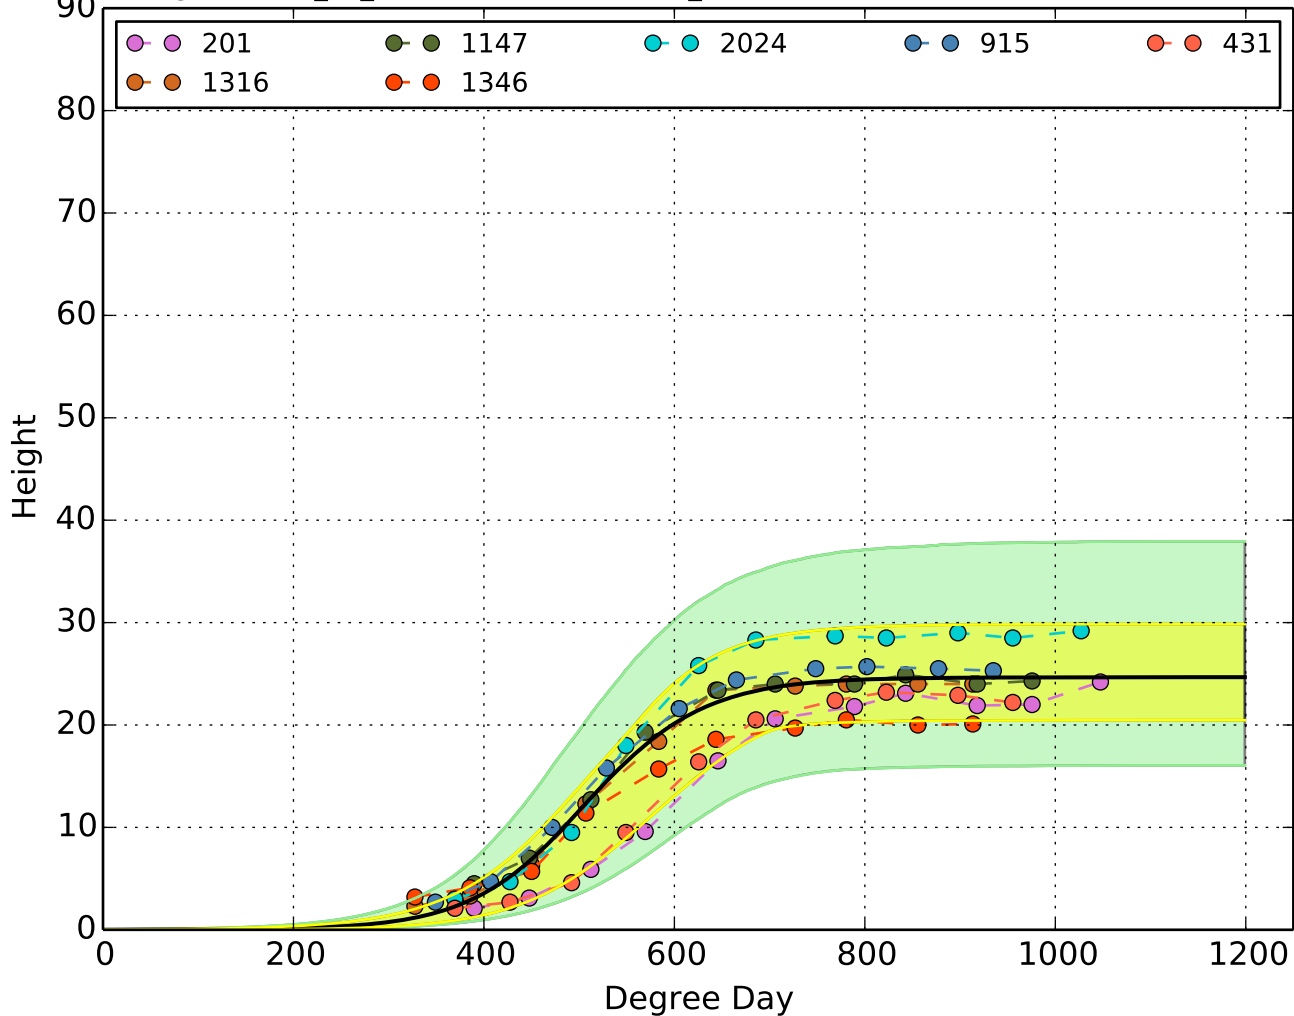

HeightModel3\_v1\_ResErrModel,Treat= CR\_2012,Line 80 (#Inv=5);95CI GrowthCurves

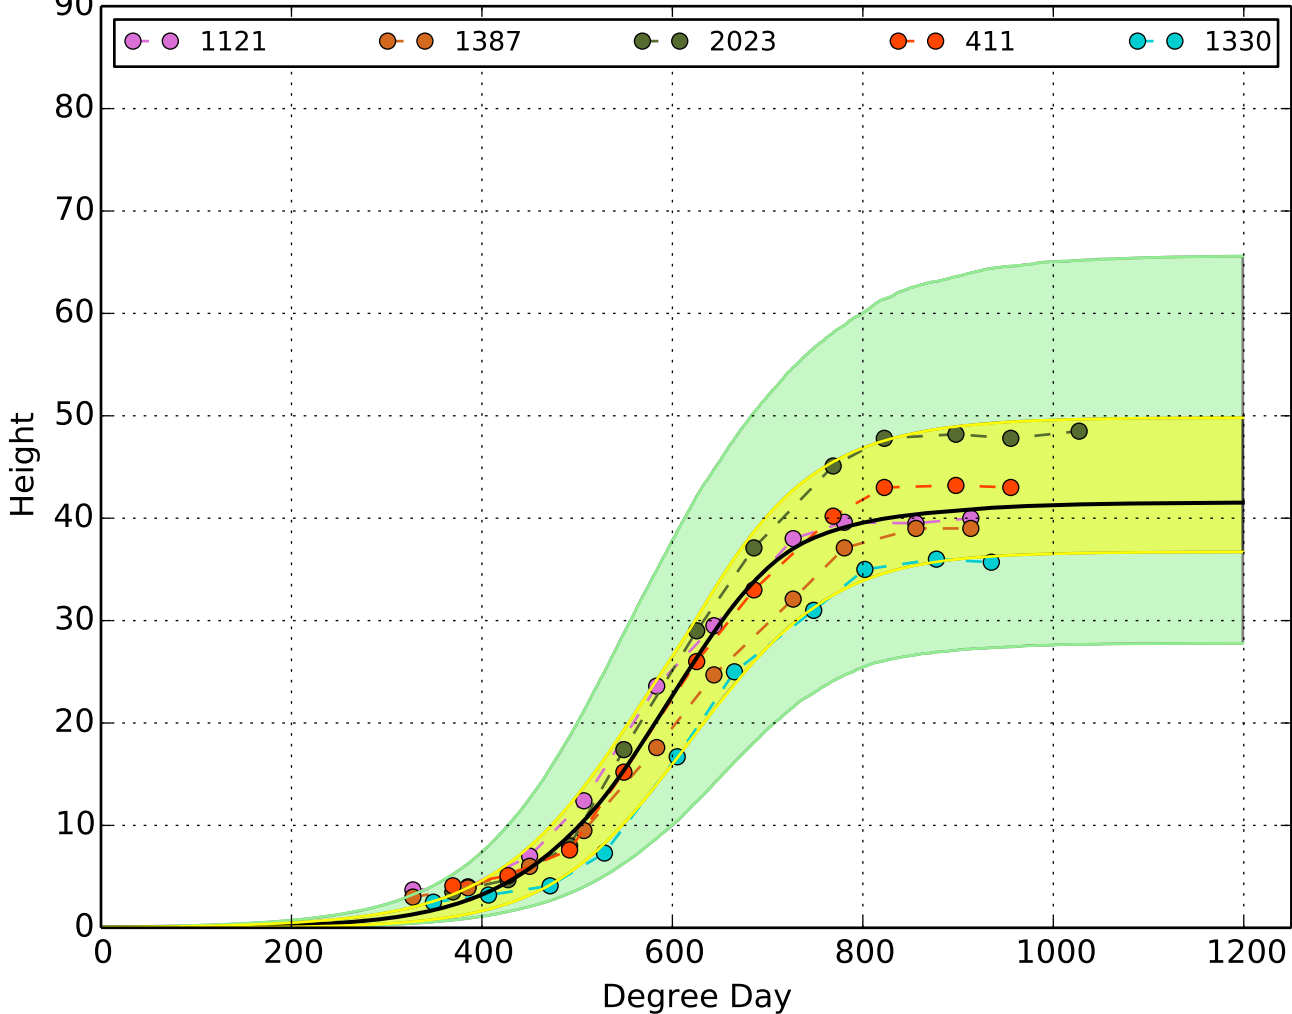

HeightModel3\_v1\_ResErrModel,Treat= CR\_2012,Line 89 (#Inv=8);95CI GrowthCurves

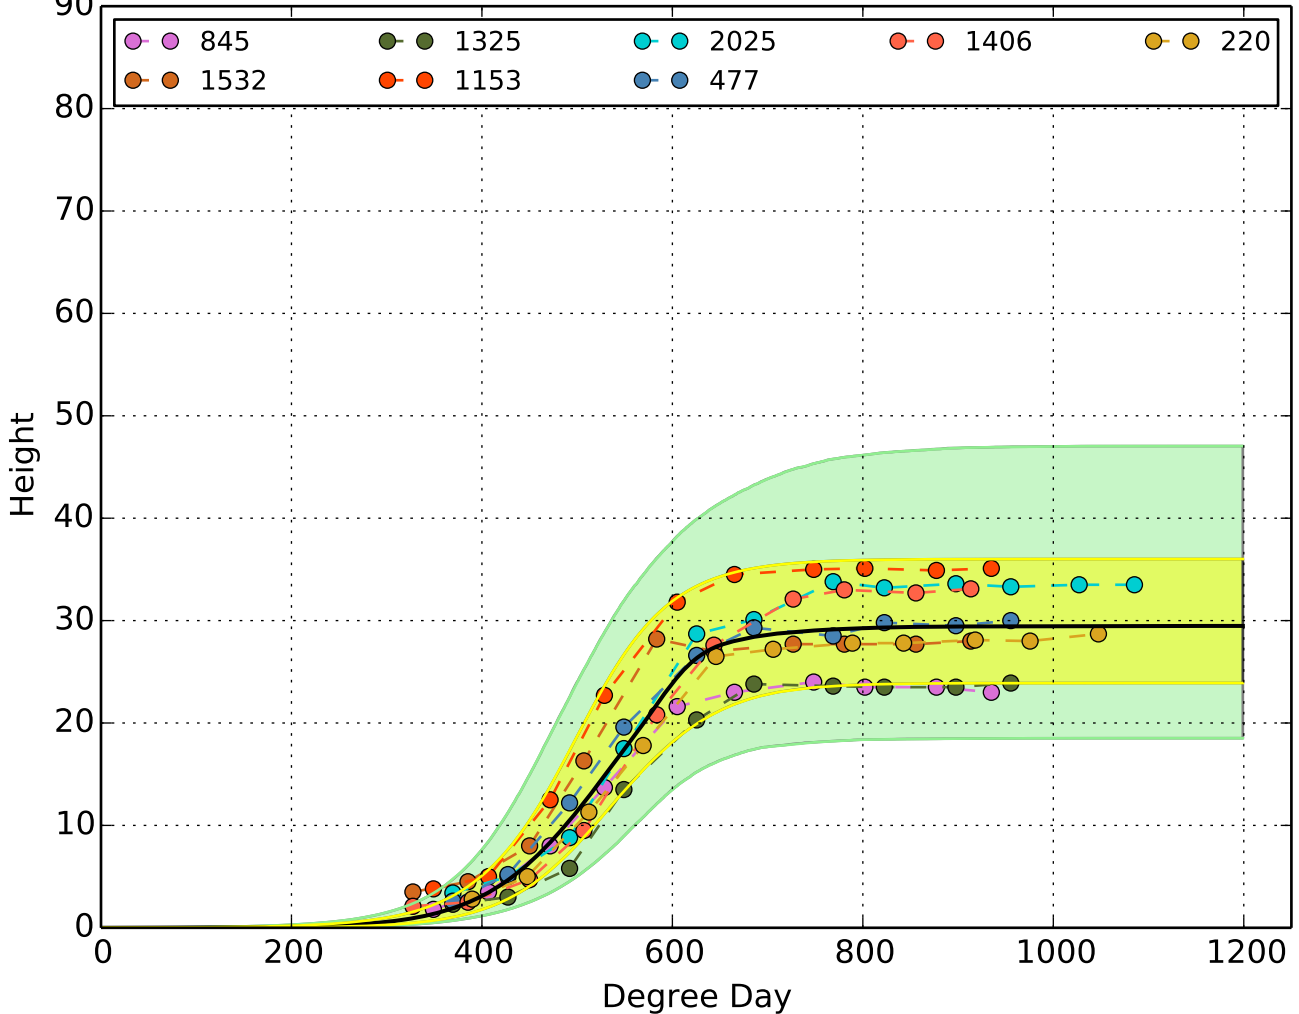

HeightModel3\_v1\_ResErrModel,Treat= CR\_2012,Line 93 (#Inv=7);95CI GrowthCurves

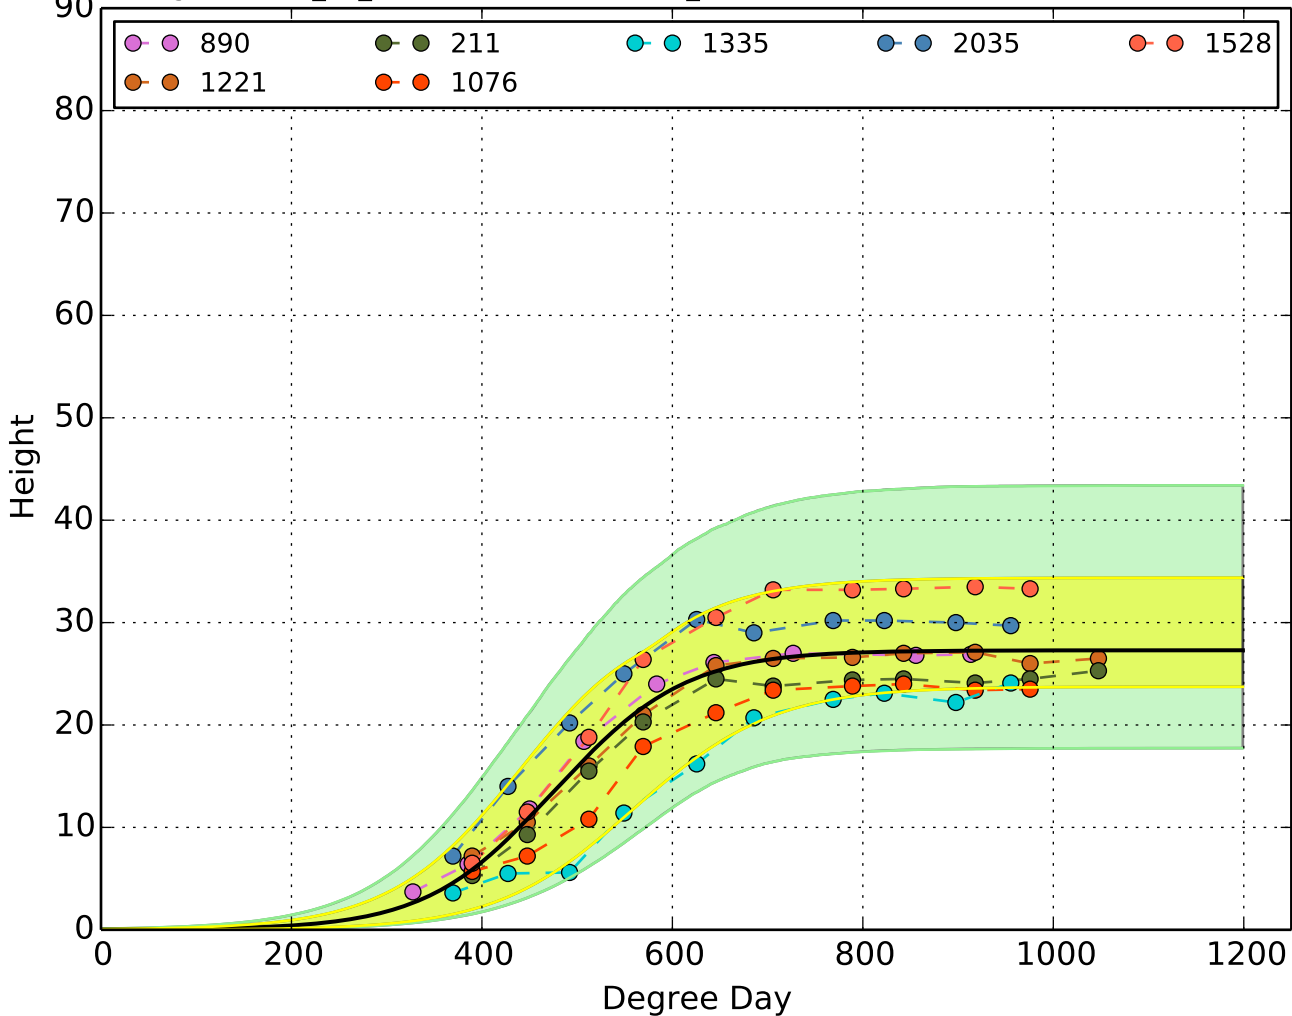

HeightModel3\_v1\_ResErrModel,Treat= CR\_2012,Line 103 (#Inv=7);95CI GrowthCurves

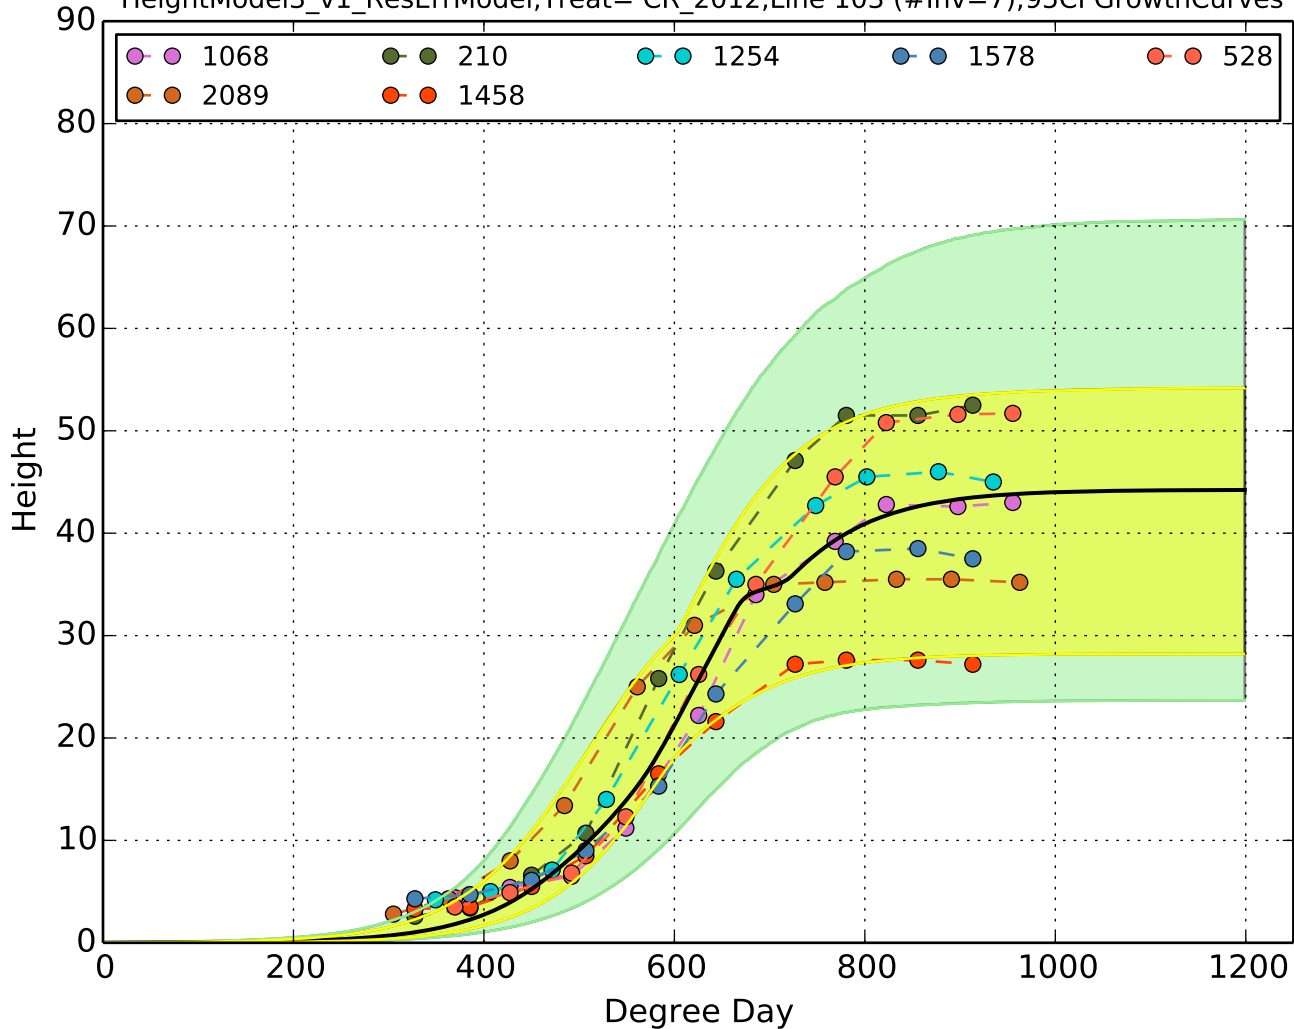

HeightModel3\_v1\_ResErrModel,Treat= CR\_2012,Line 115 (#Inv=7);95CI GrowthCurves

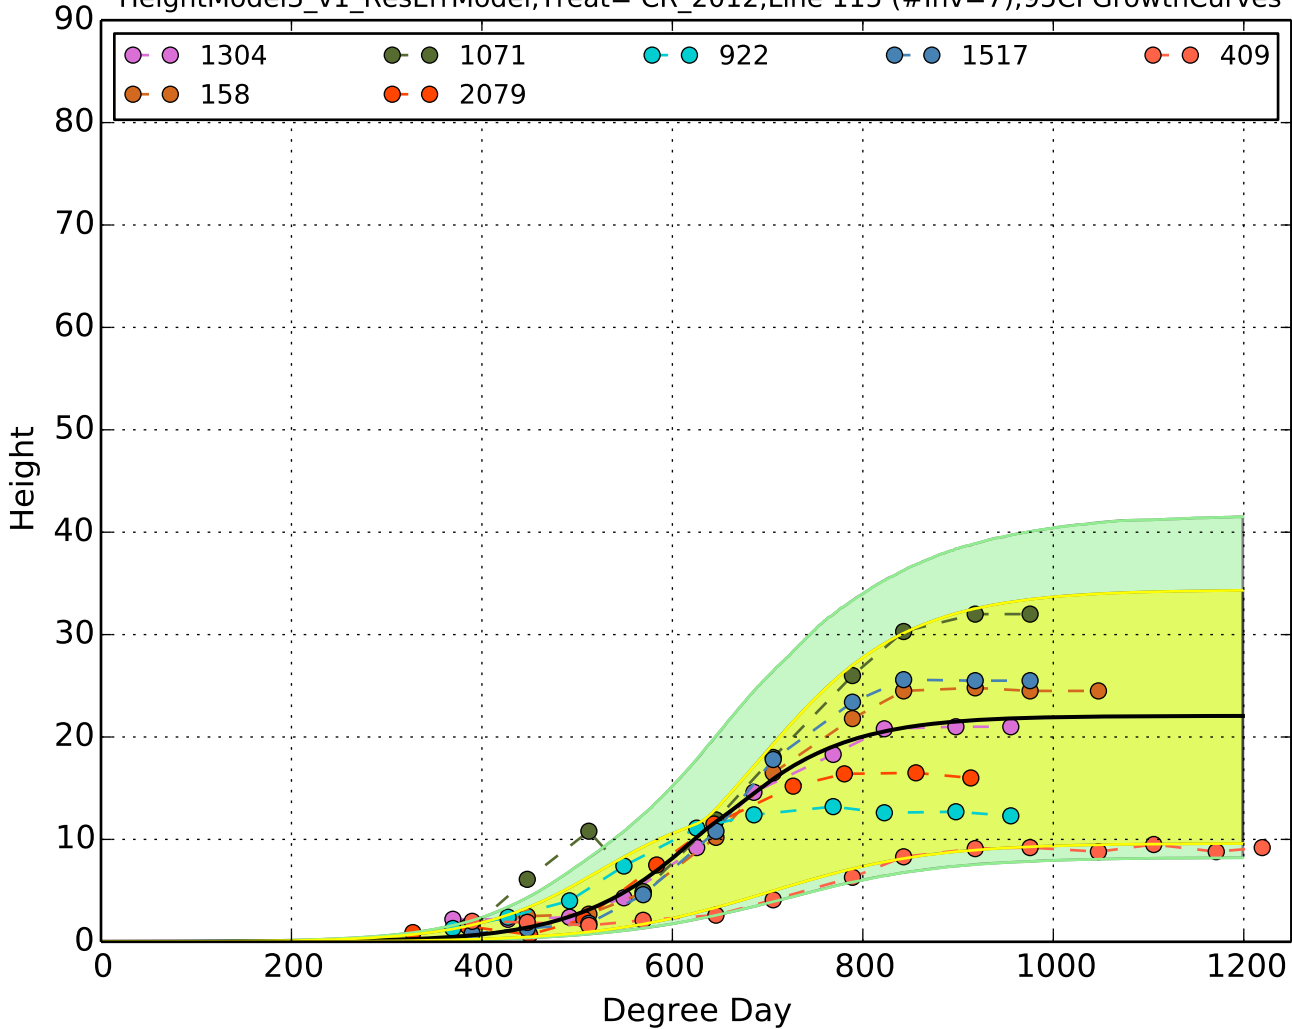

HeightModel3\_v1\_ResErrModel,Treat= CR\_2012,Line 124 (#Inv=7);95CI GrowthCurves

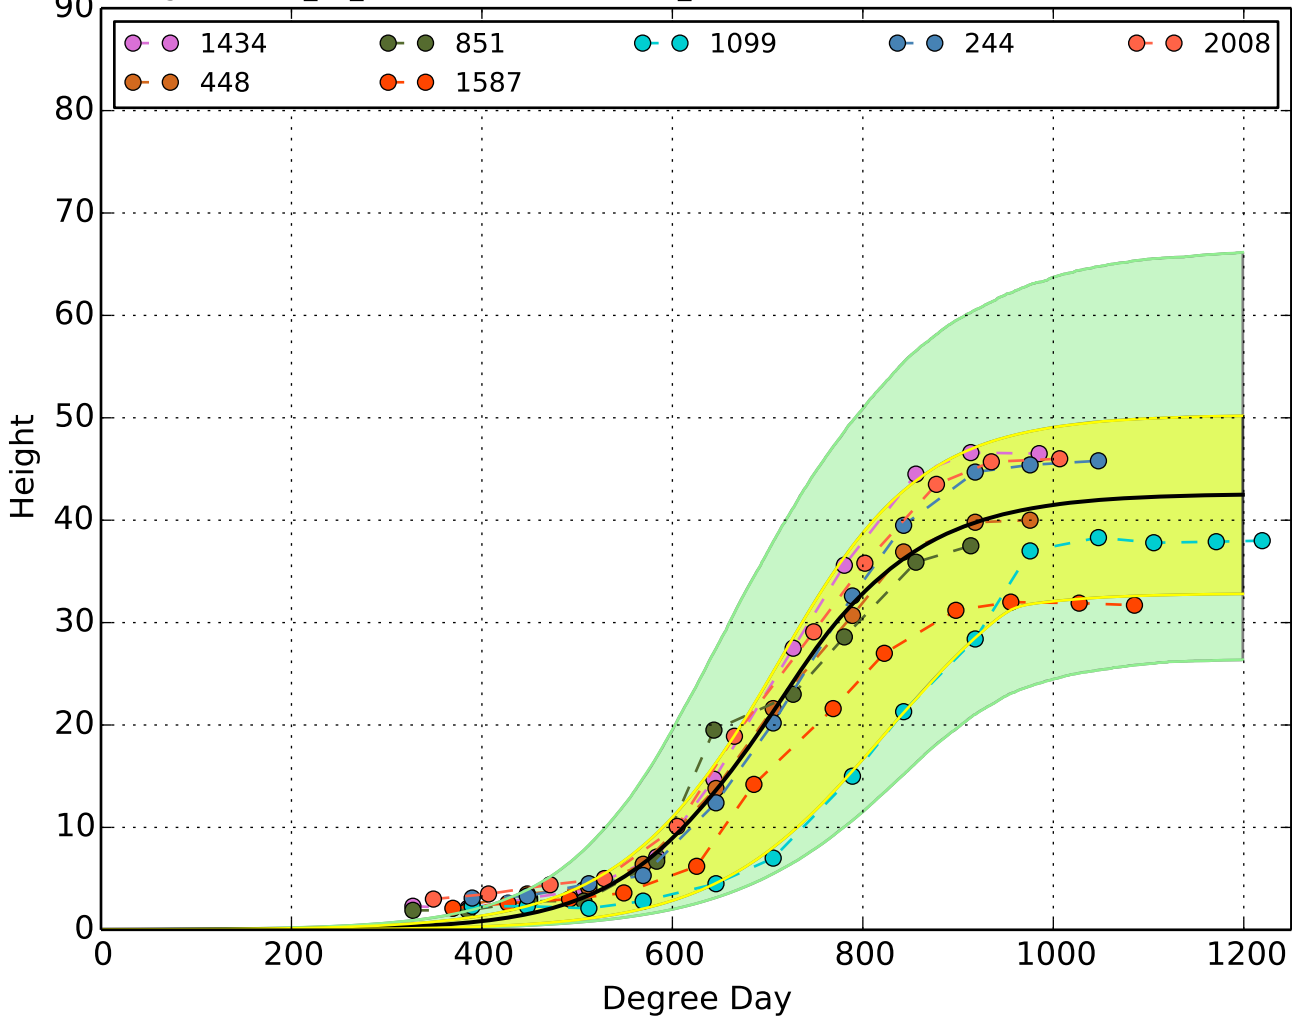



HeightModel3\_v1\_ResErrModel,Treat= CR\_2012,Line 131 (#Inv=8);95CI GrowthCurves

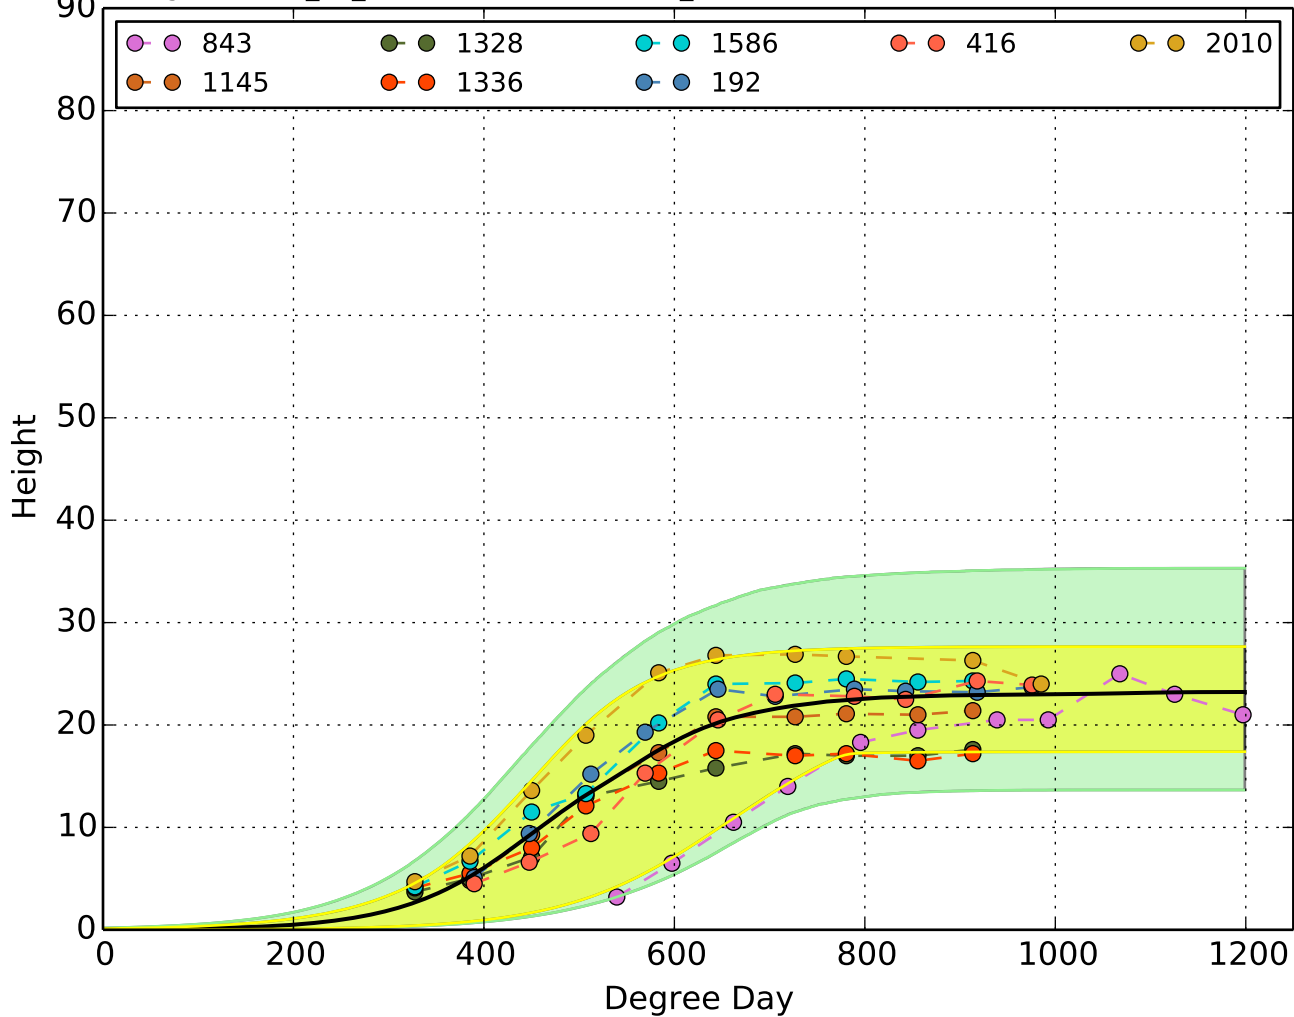

HeightModel3\_v1\_ResErrModel,Treat= CR\_2012,Line 136 (#Inv=8);95CI GrowthCurves

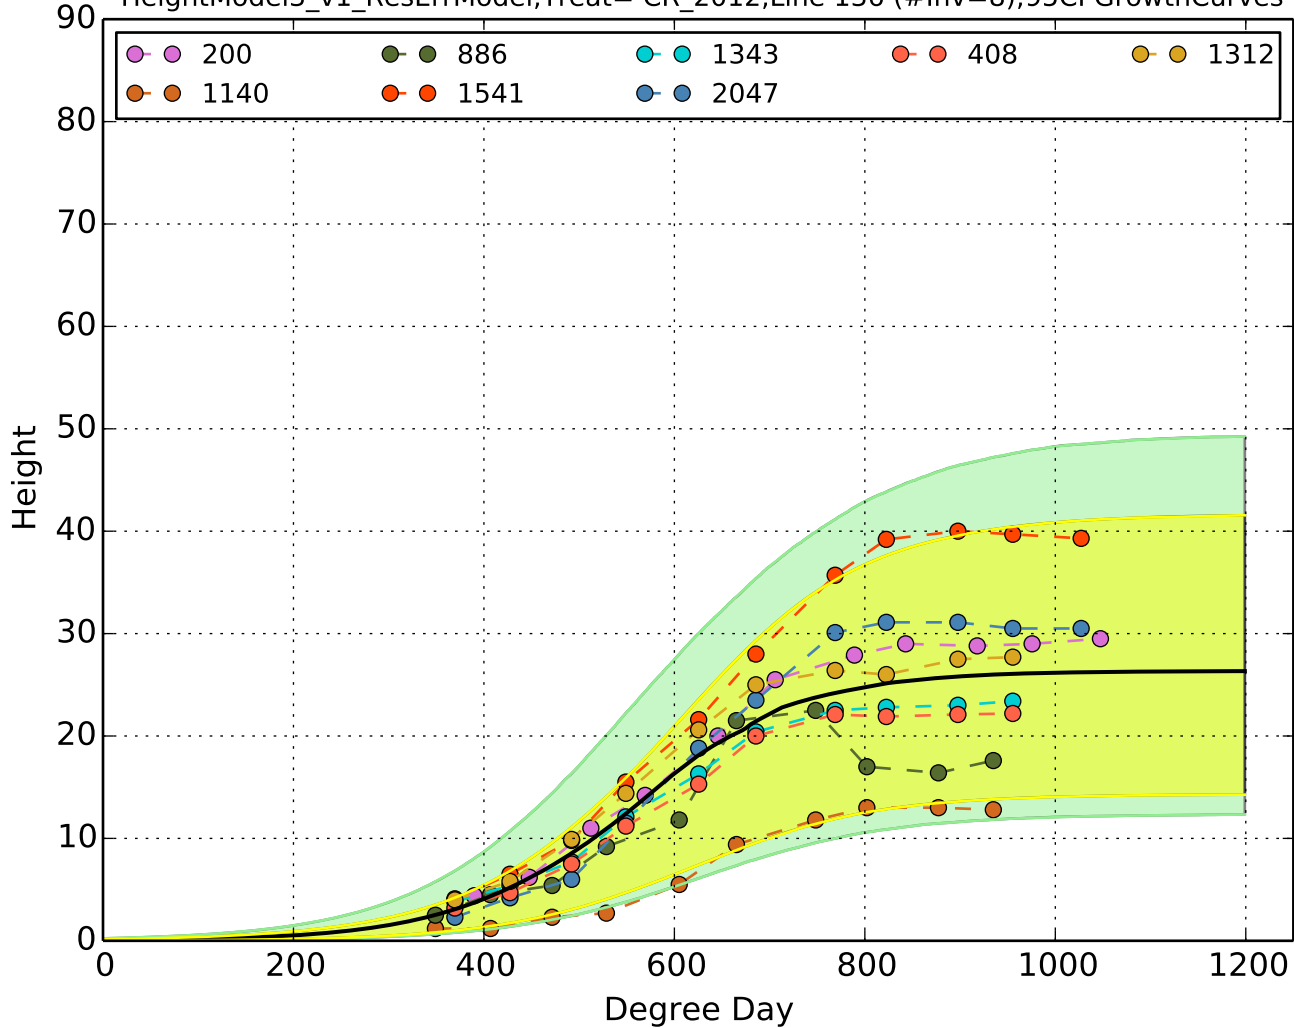

HeightModel3\_v1\_ResErrModel,Treat= CR\_2012,Line 143 (#Inv=6);95CI GrowthCurves

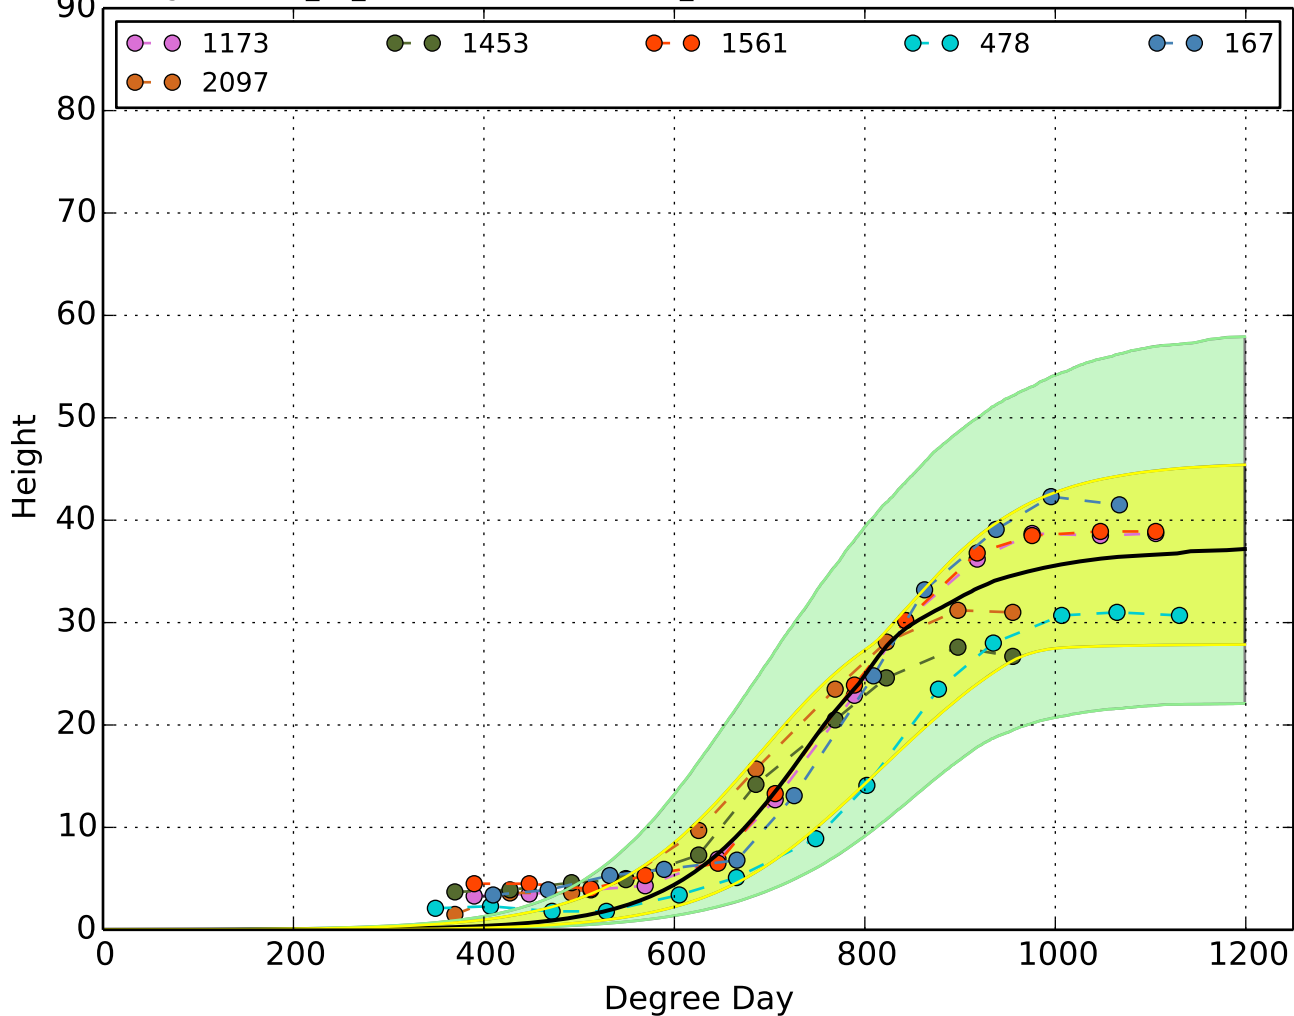

HeightModel3\_v1\_ResErrModel,Treat= CR\_2012,Line 146 (#Inv=7);95CI GrowthCurves

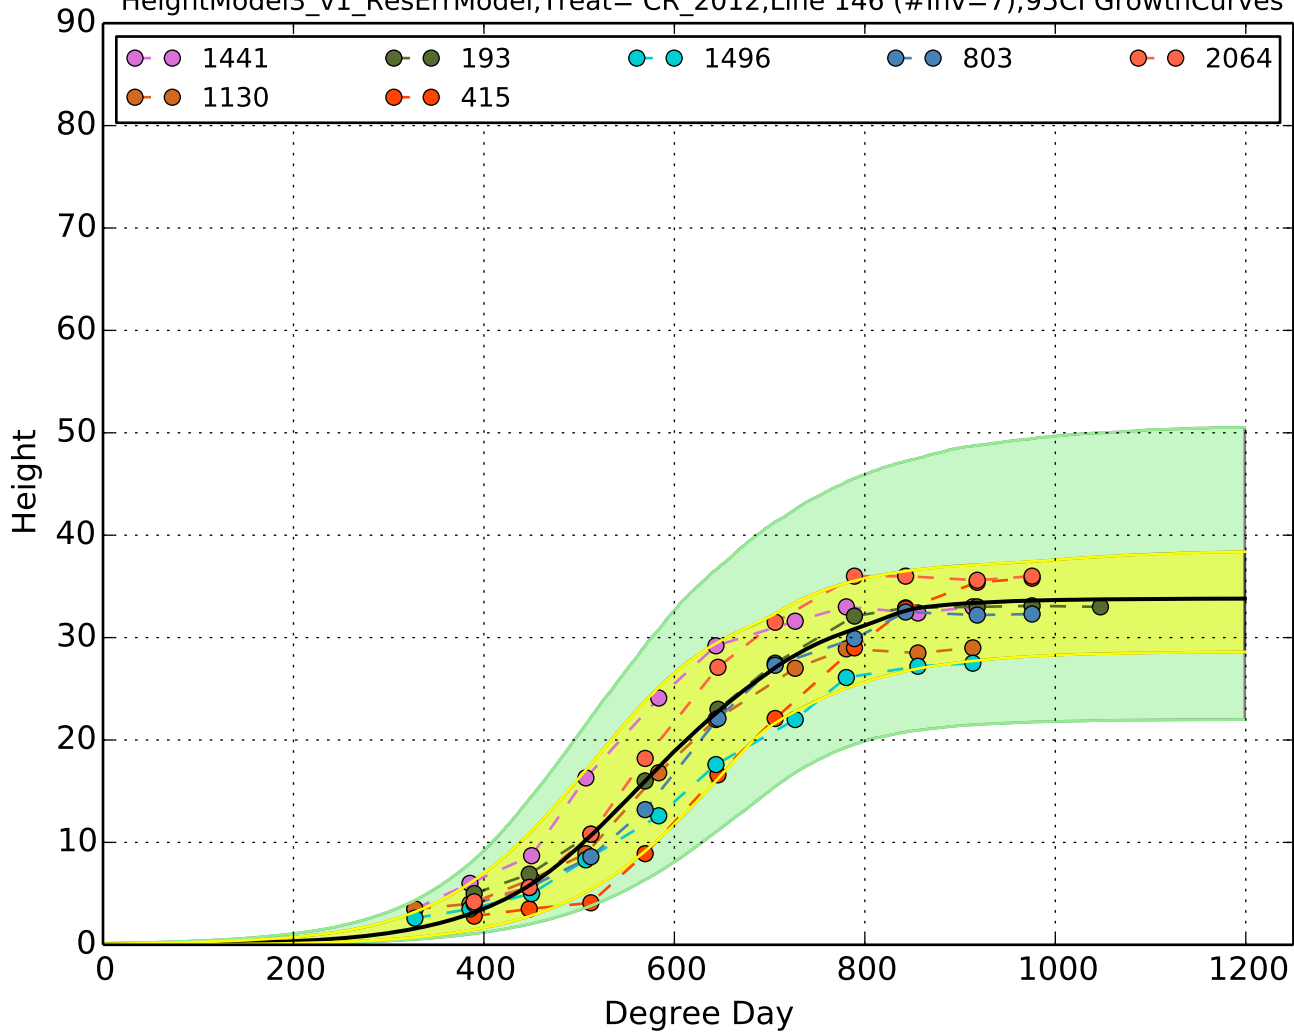

HeightModel3\_v1\_ResErrModel,Treat= CR\_2012,Line 147 (#Inv=6);95CI GrowthCurves

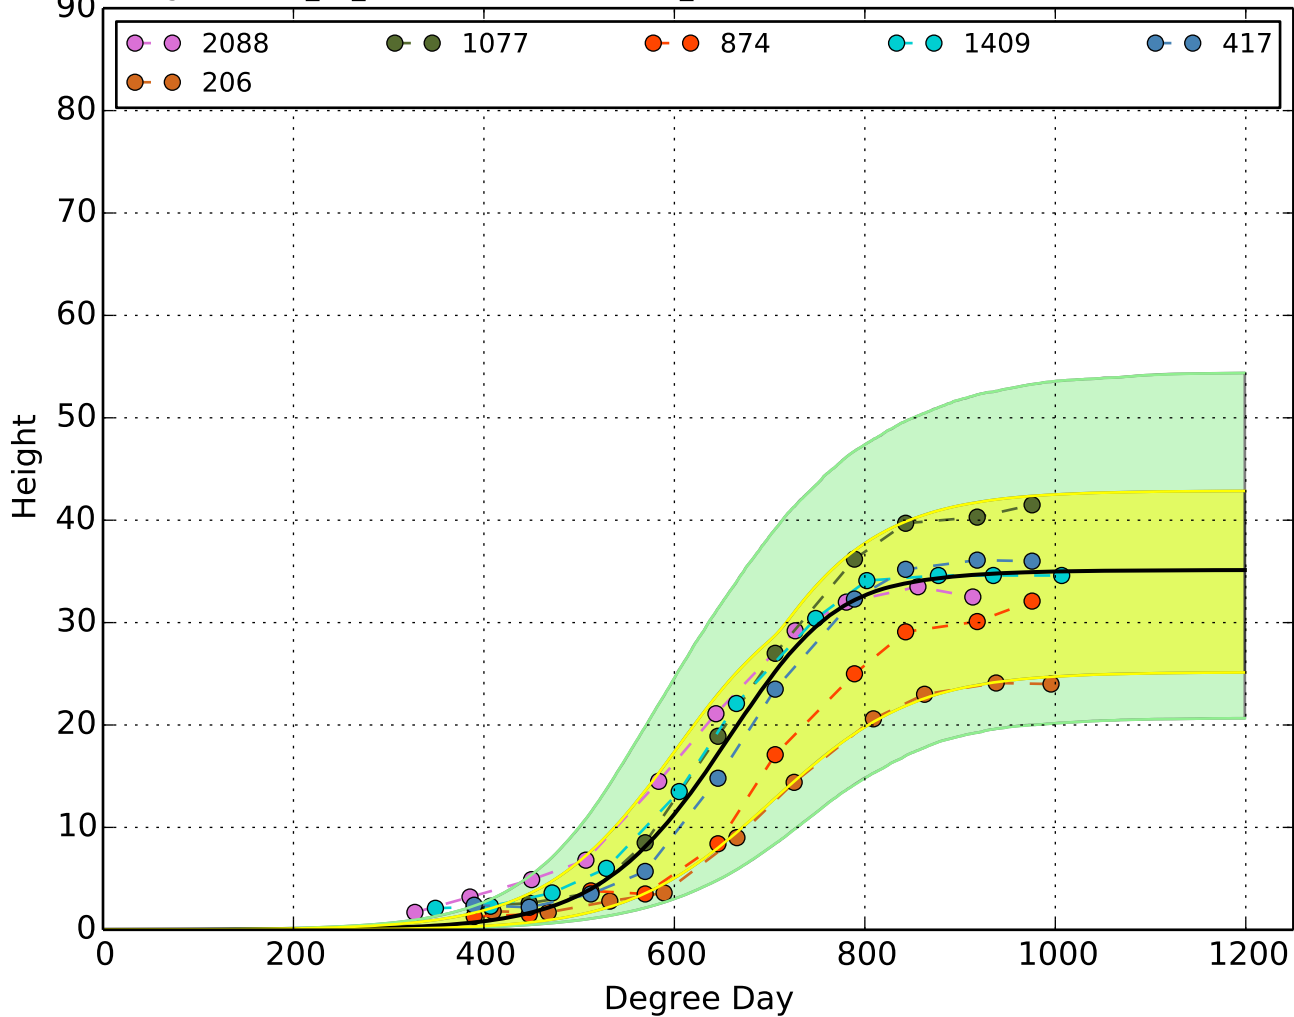

HeightModel3\_v1\_ResErrModel,Treat= CR\_2012,Line 150 (#Inv=8);95CI GrowthCurves

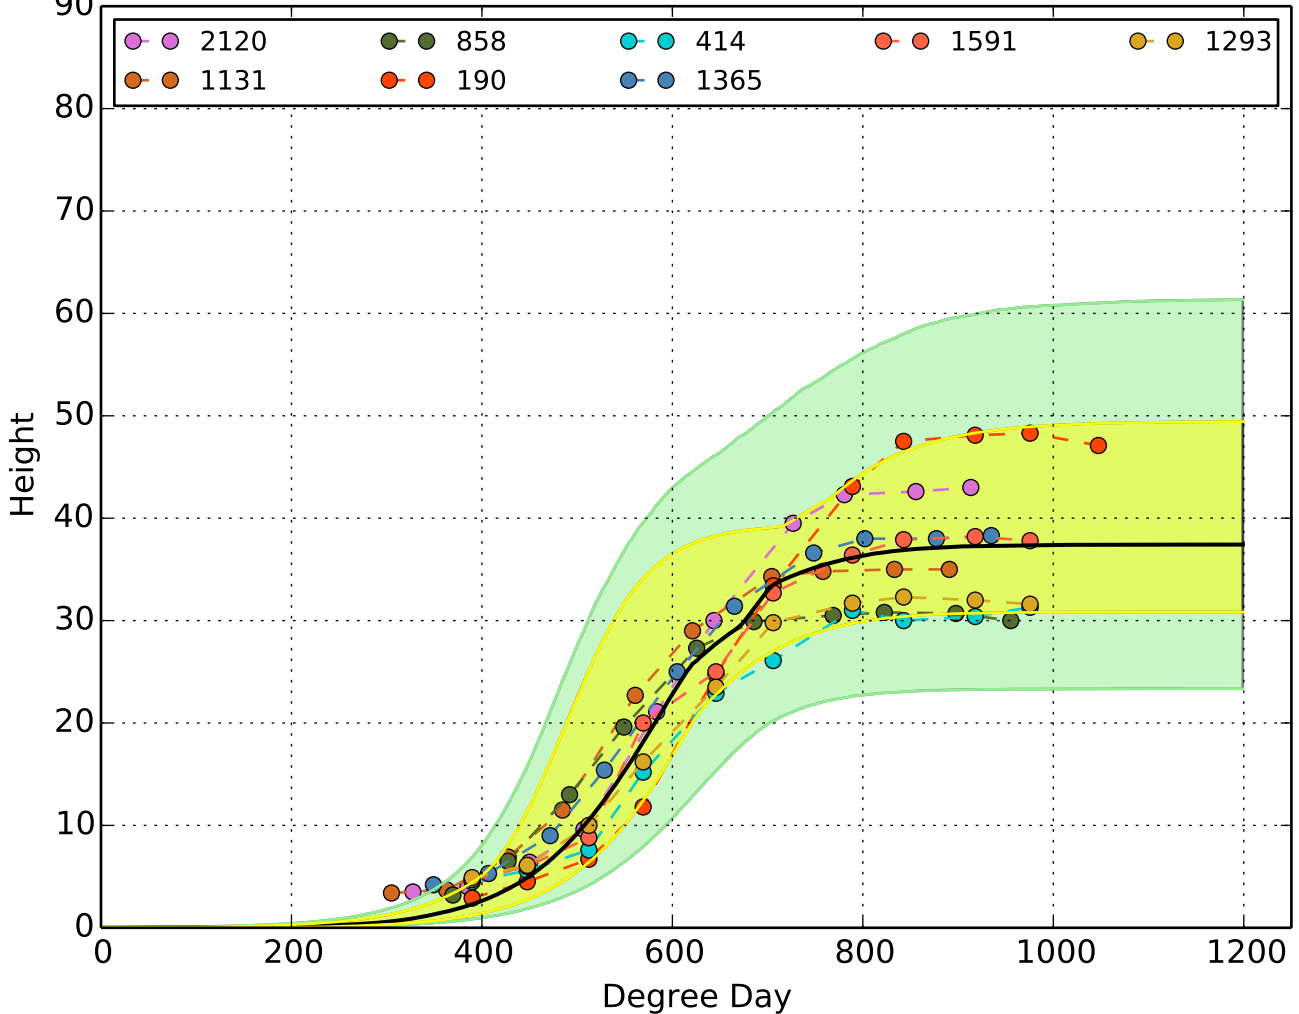

HeightModel3\_v1\_ResErrModel,Treat= CR\_2012,Line 154 (#Inv=7);95CI GrowthCurves

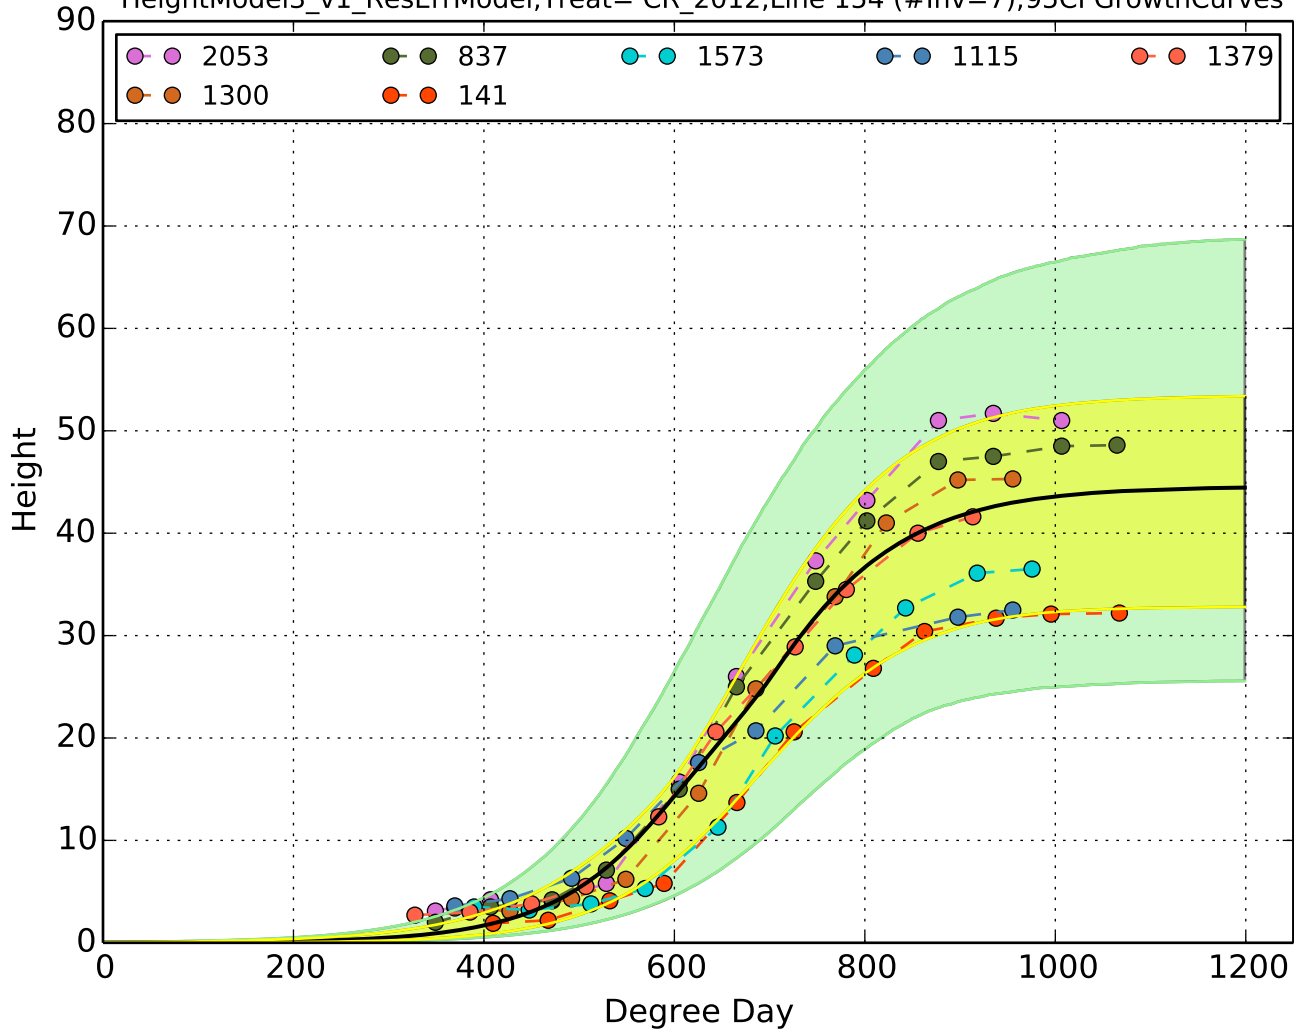

HeightModel3\_v1\_ResErrModel,Treat= CR\_2012,Line 155 (#Inv=7);95CI GrowthCurves

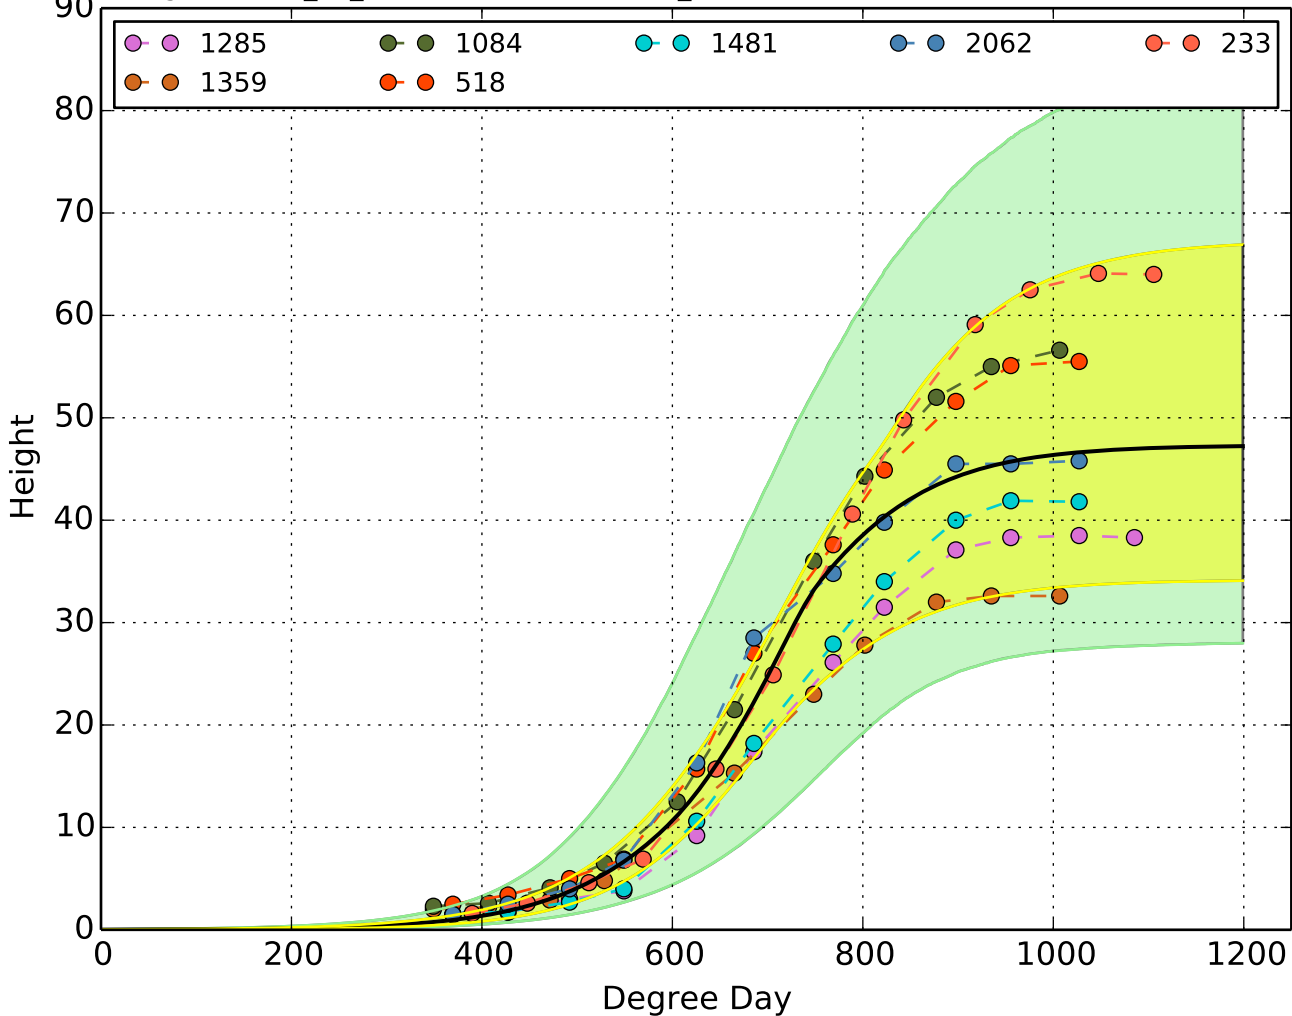



HeightModel3\_v1\_ResErrModel,Treat= CR\_2012,Line 164 (#Inv=7);95CI GrowthCurves

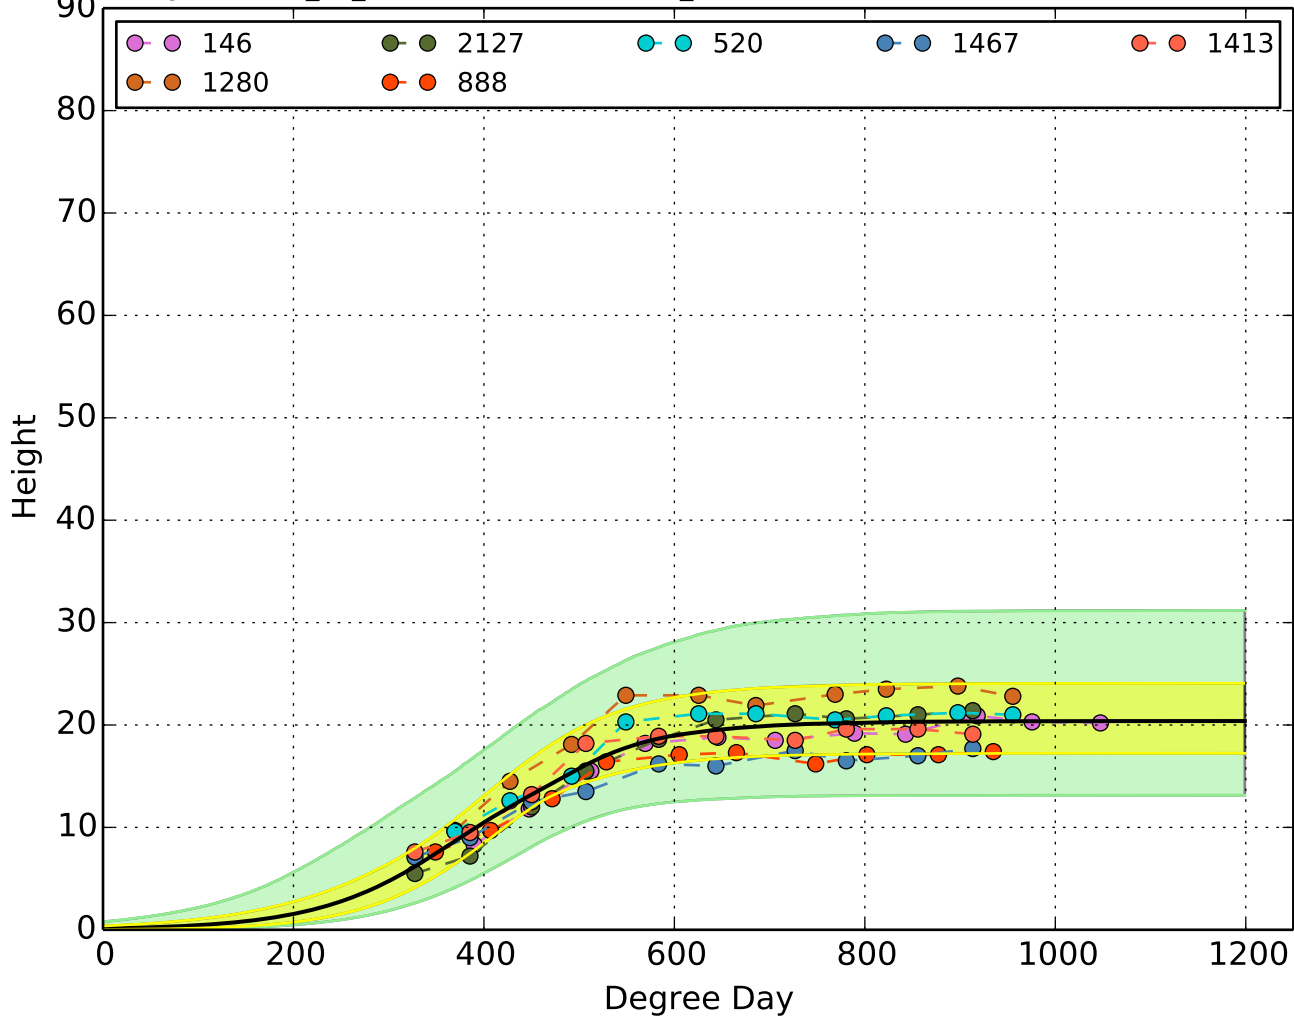

HeightModel3\_v1\_ResErrModel,Treat= CR\_2012,Line 171 (#Inv=7);95CI GrowthCurves

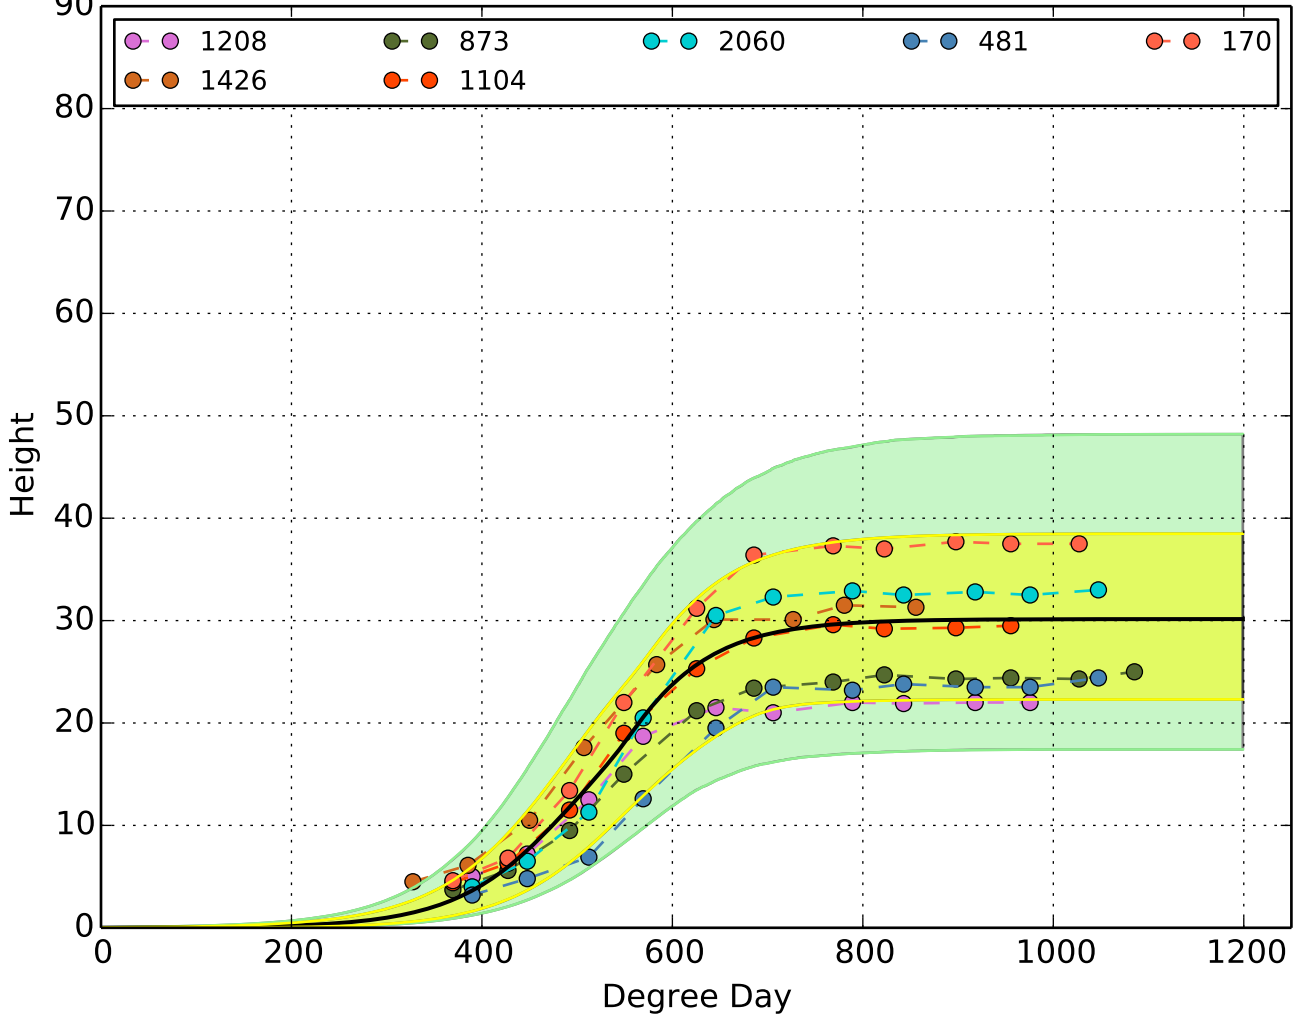

HeightModel3\_v1\_ResErrModel,Treat= CR\_2012,Line 174 (#Inv=8);95CI GrowthCurves

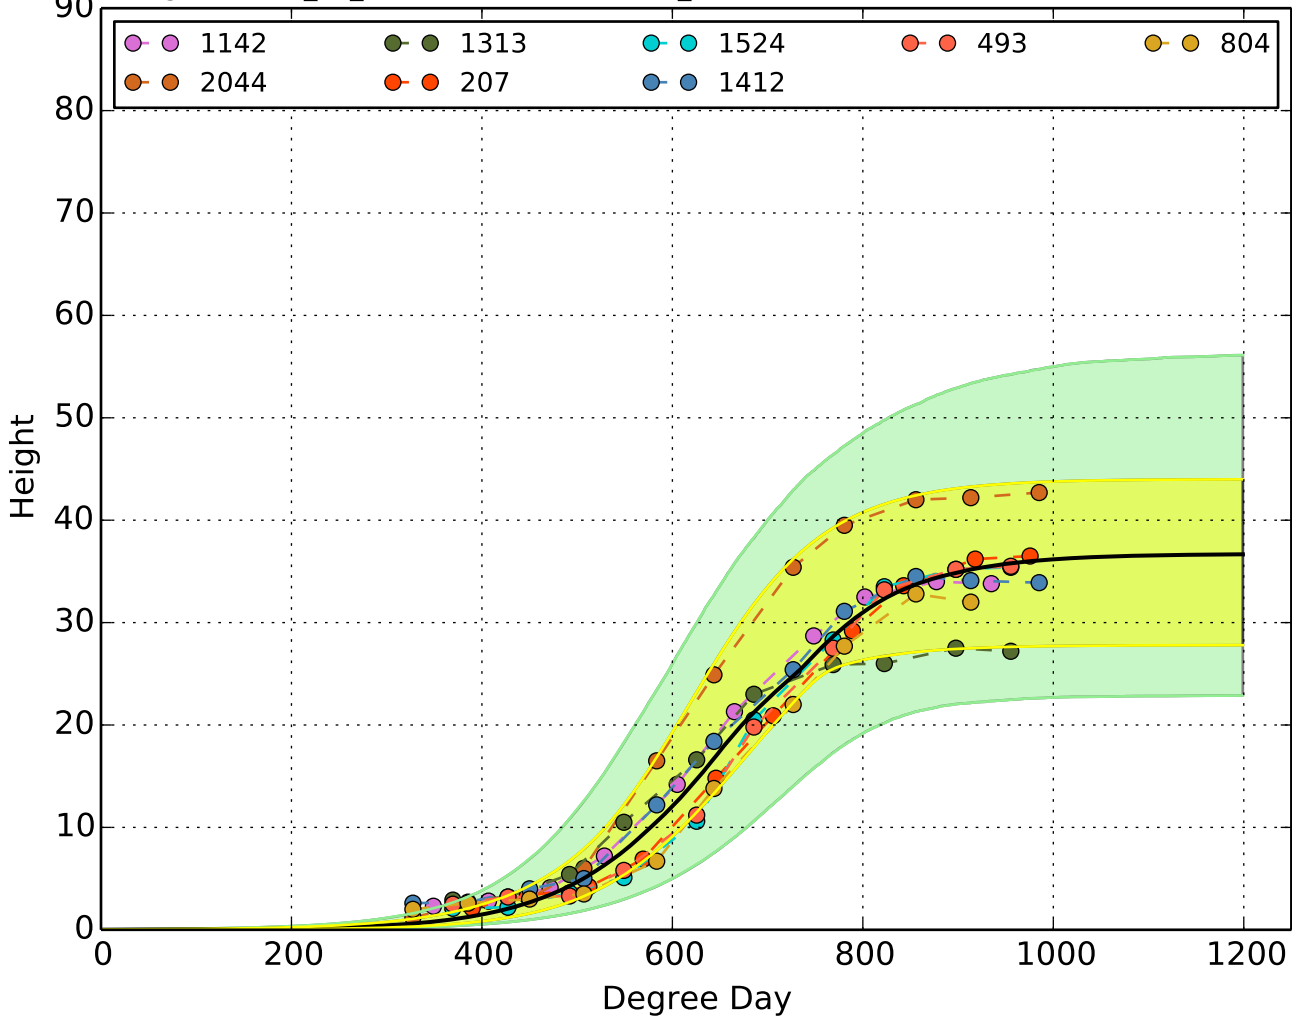

HeightModel3\_v1\_ResErrModel,Treat= CR\_2012,Line 175 (#Inv=7);95CI GrowthCurves

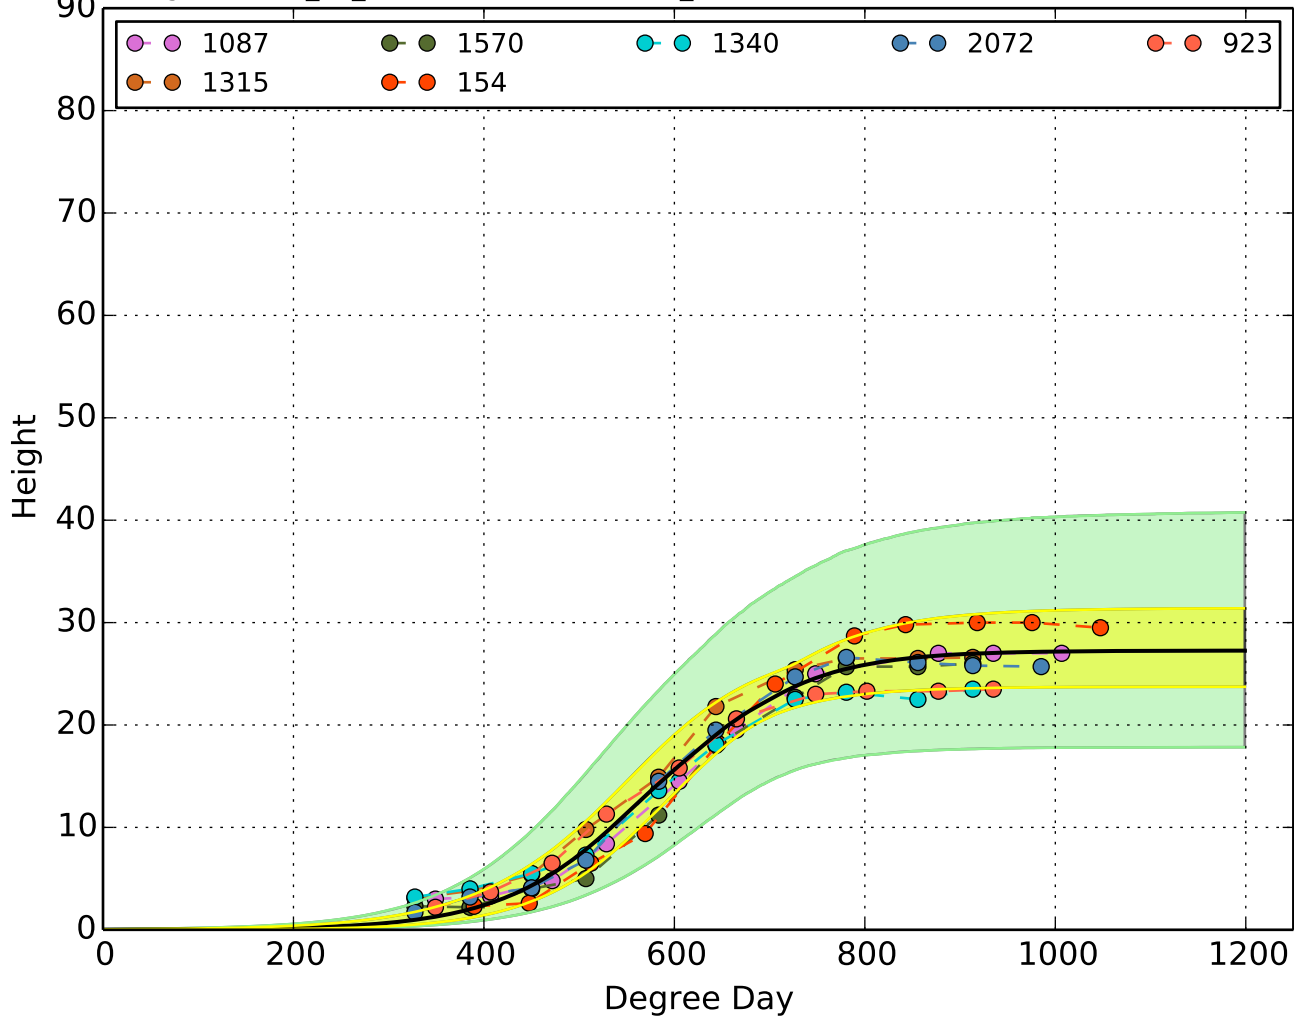

HeightModel3\_v1\_ResErrModel,Treat= CR\_2012,Line 176 (#Inv=7);95CI GrowthCurves

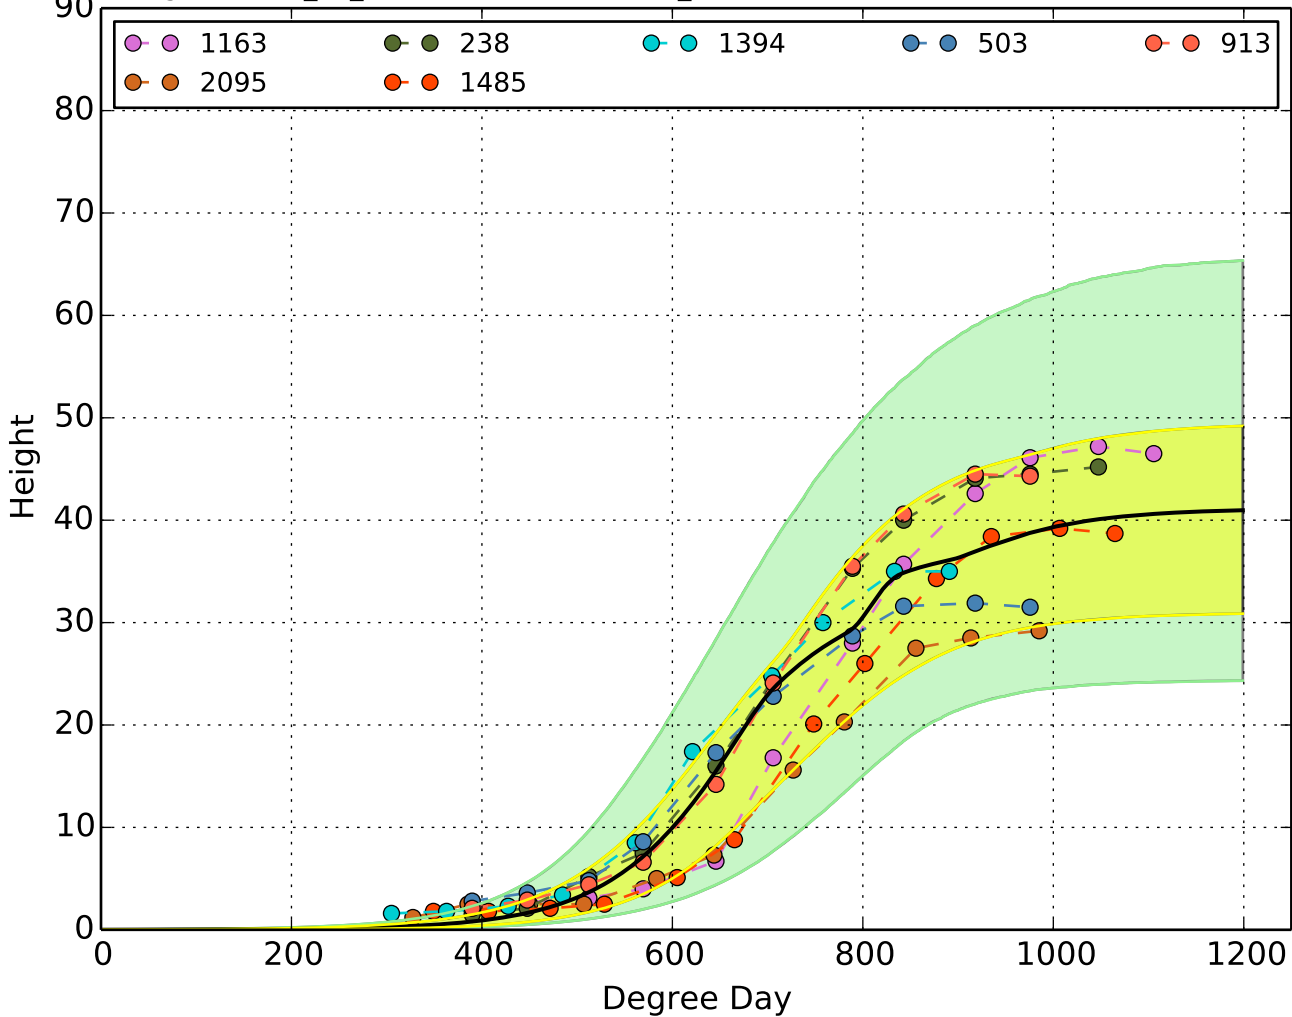

HeightModel3\_v1\_ResErrModel,Treat= CR\_2012,Line 182 (#Inv=7);95CI GrowthCurves

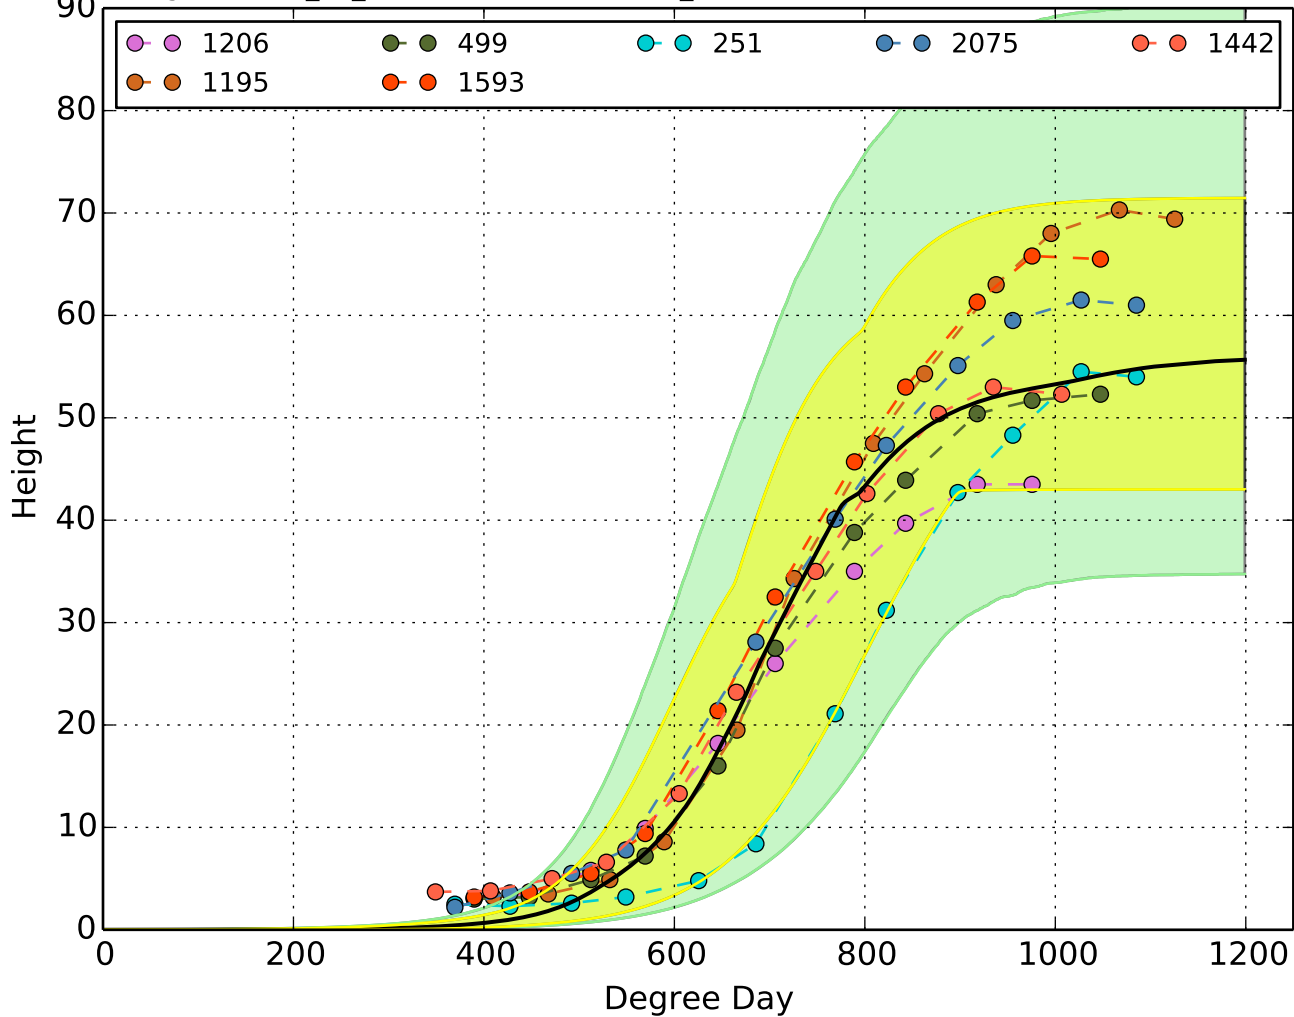

HeightModel3\_v1\_ResErrModel,Treat= CR\_2012,Line 183 (#Inv=7);95CI GrowthCurves

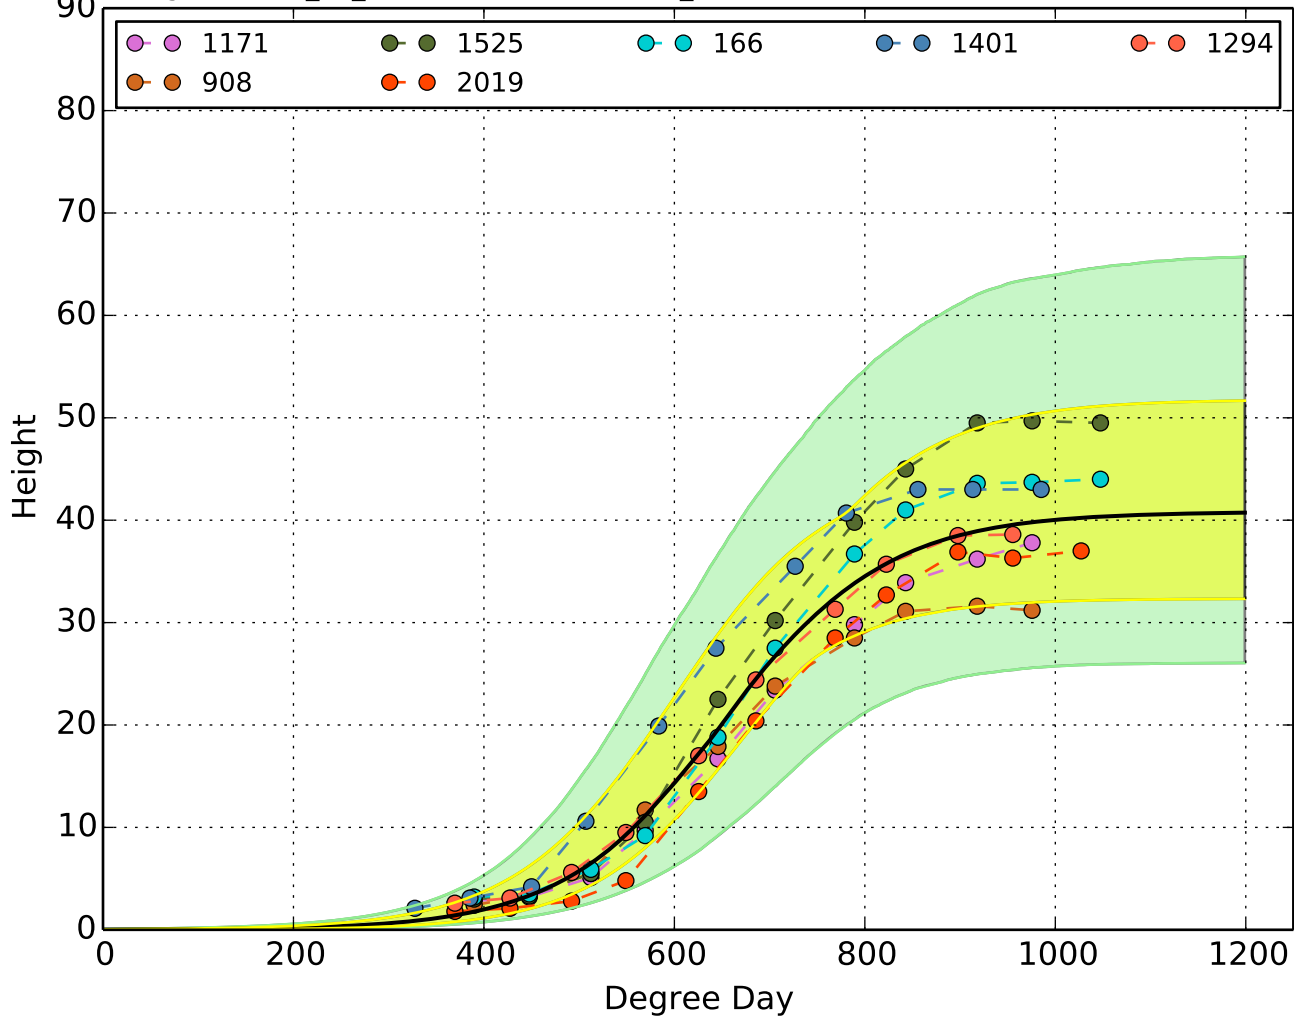

HeightModel3\_v1\_ResErrModel,Treat= CR\_2012,Line 184 (#Inv=7);95CI GrowthCurves

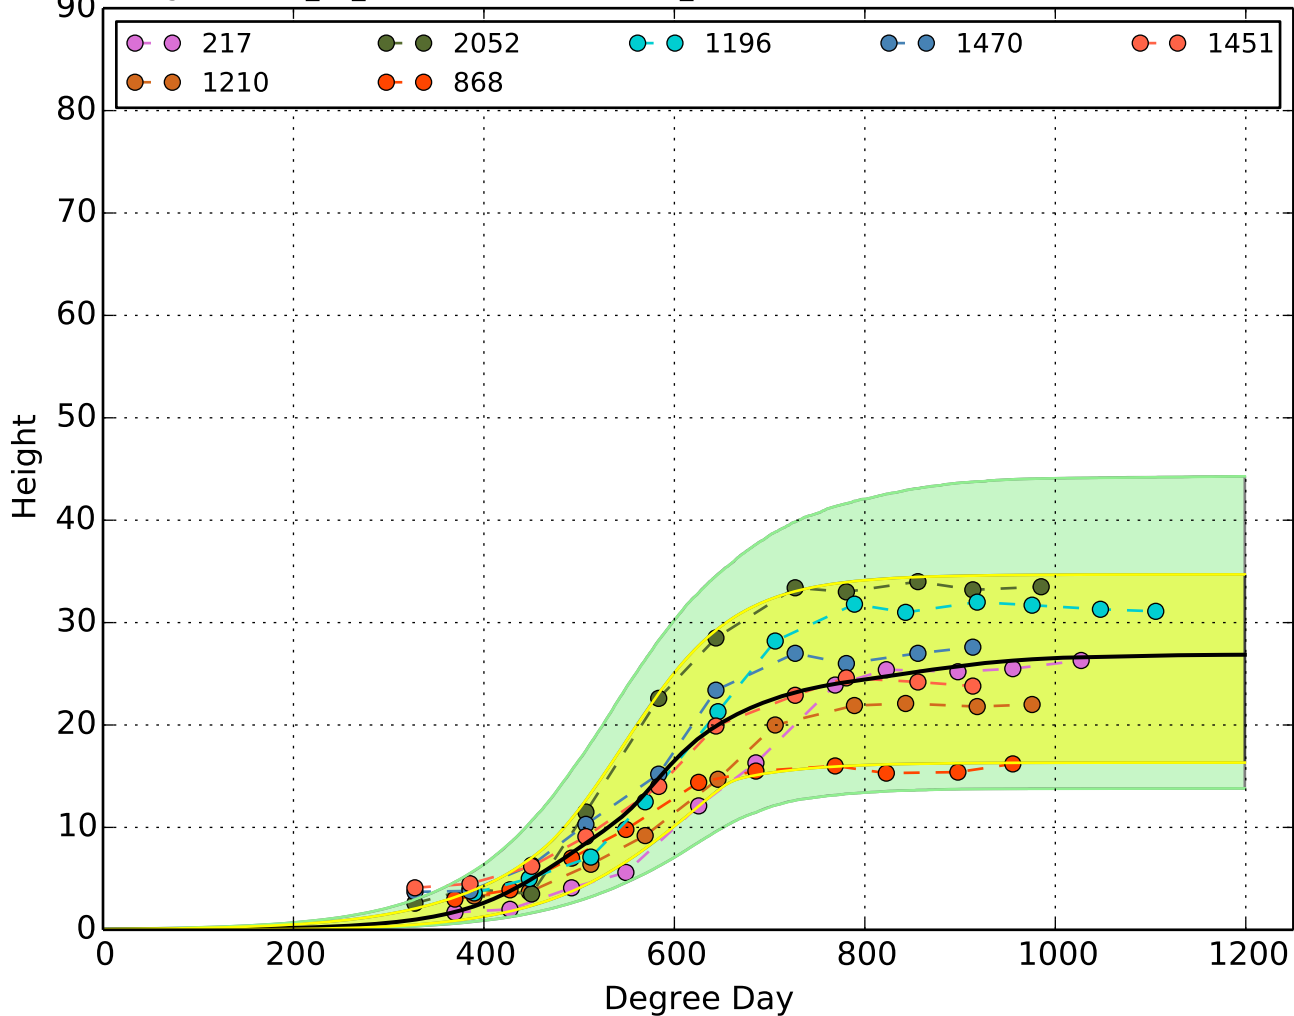



HeightModel3\_v1\_ResErrModel,Treat= CR\_2012,Line 187 (#Inv=7);95CI GrowthCurves

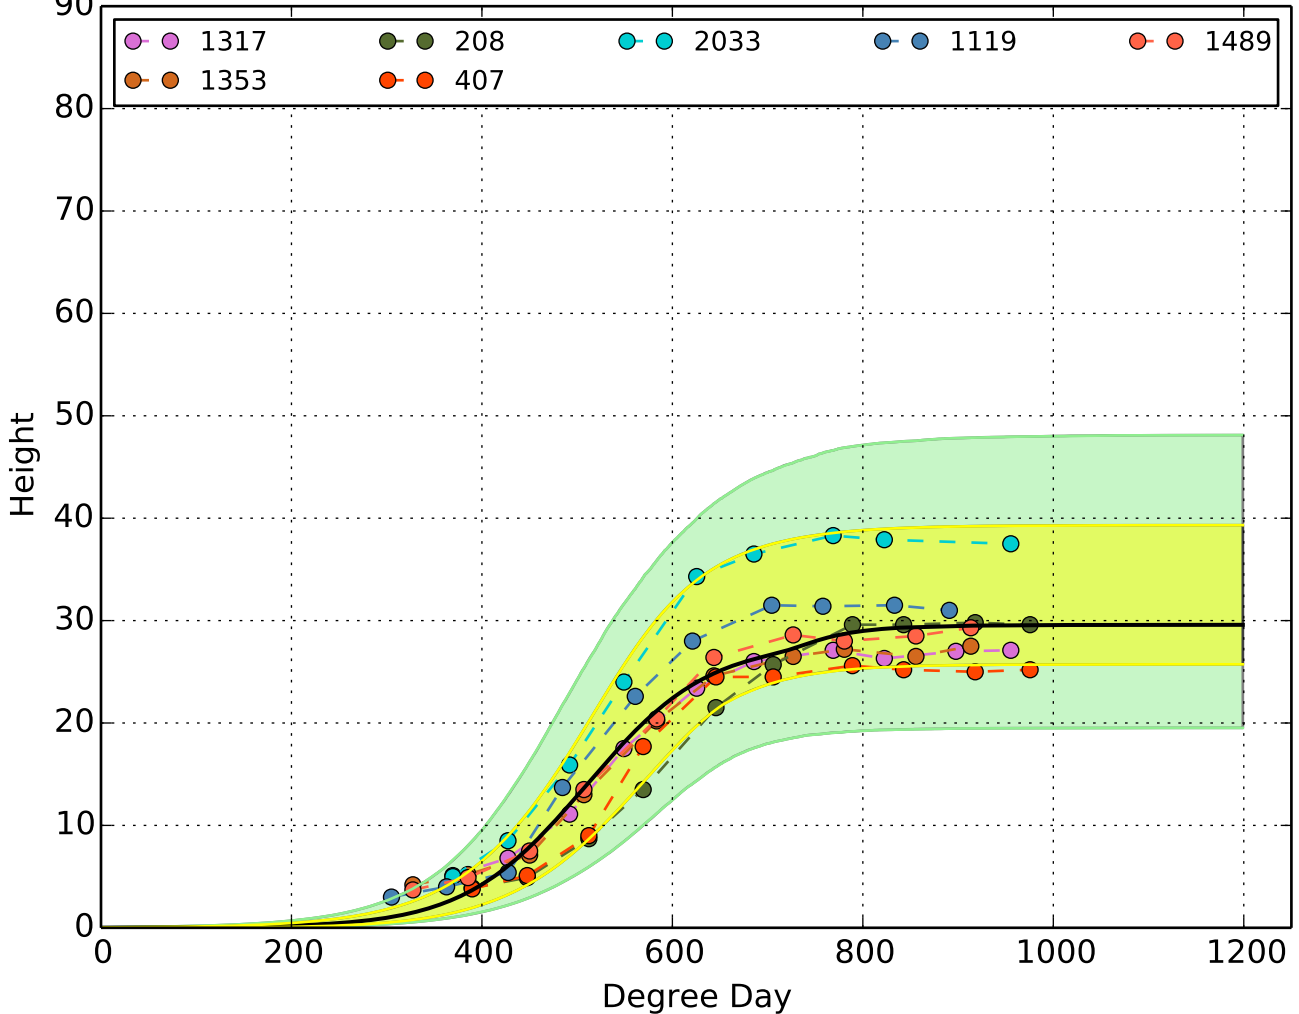

HeightModel3\_v1\_ResErrModel,Treat= CR\_2012,Line 190 (#Inv=6);95CI GrowthCurves

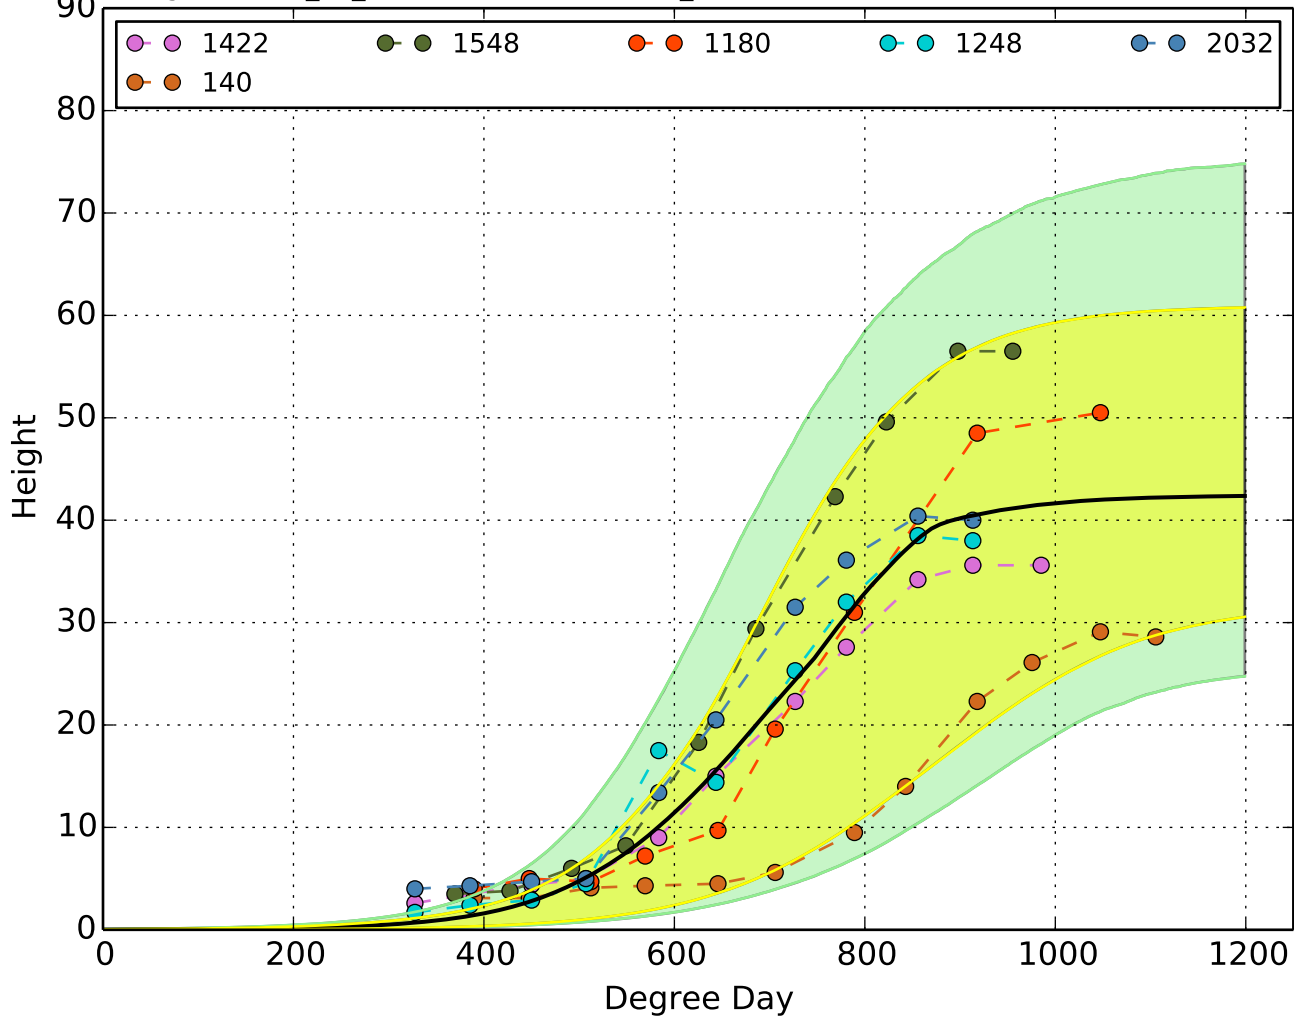

HeightModel3\_v1\_ResErrModel,Treat= CR\_2012,Line 193 (#Inv=8);95CI GrowthCurves

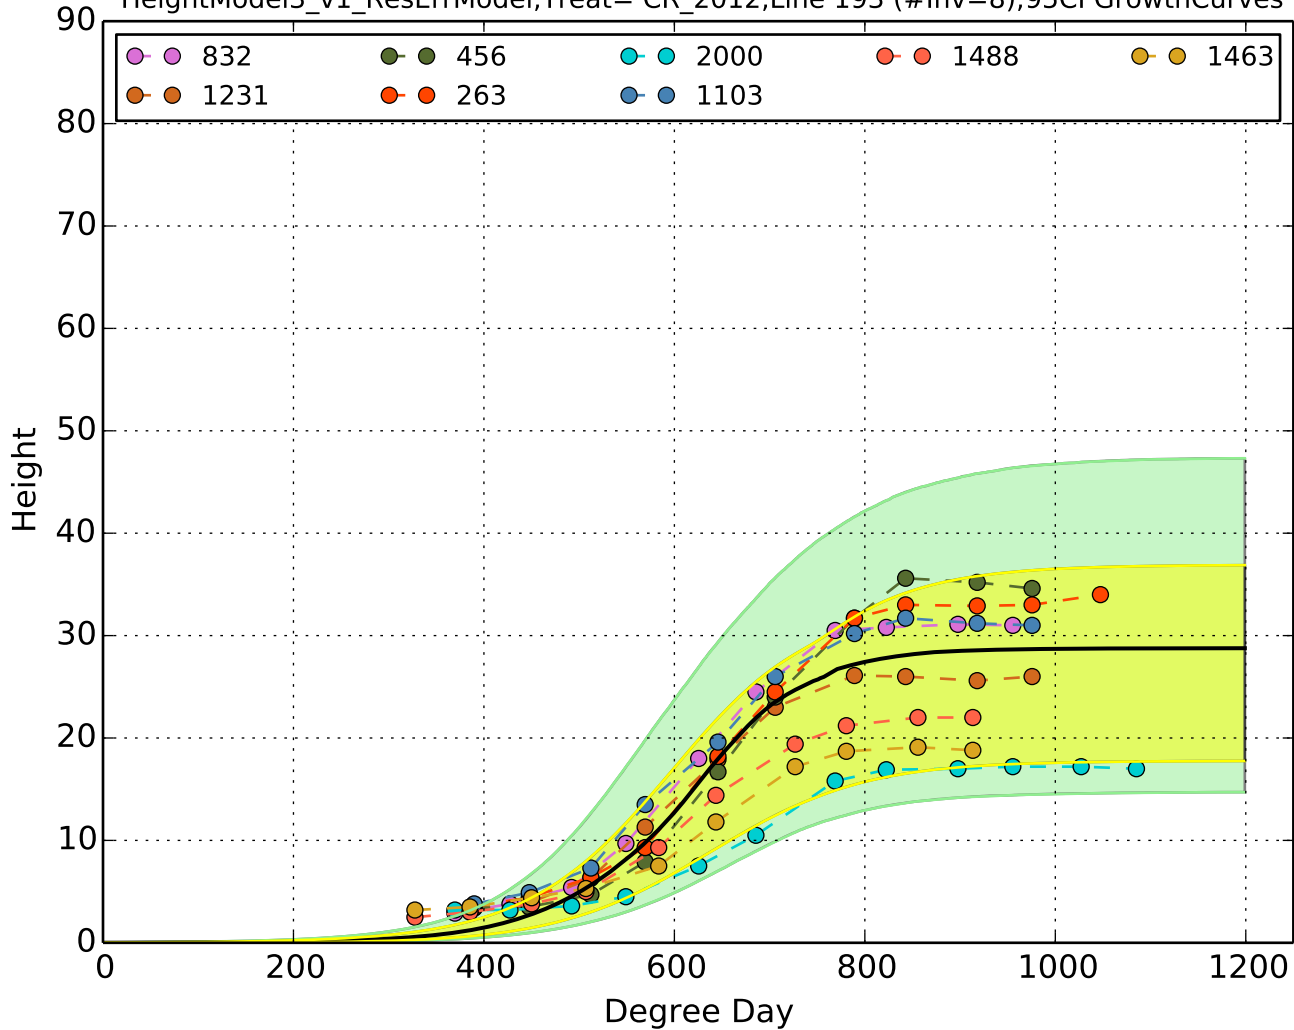

HeightModel3\_v1\_ResErrModel,Treat= CR\_2012,Line 198 (#Inv=6);95CI GrowthCurves

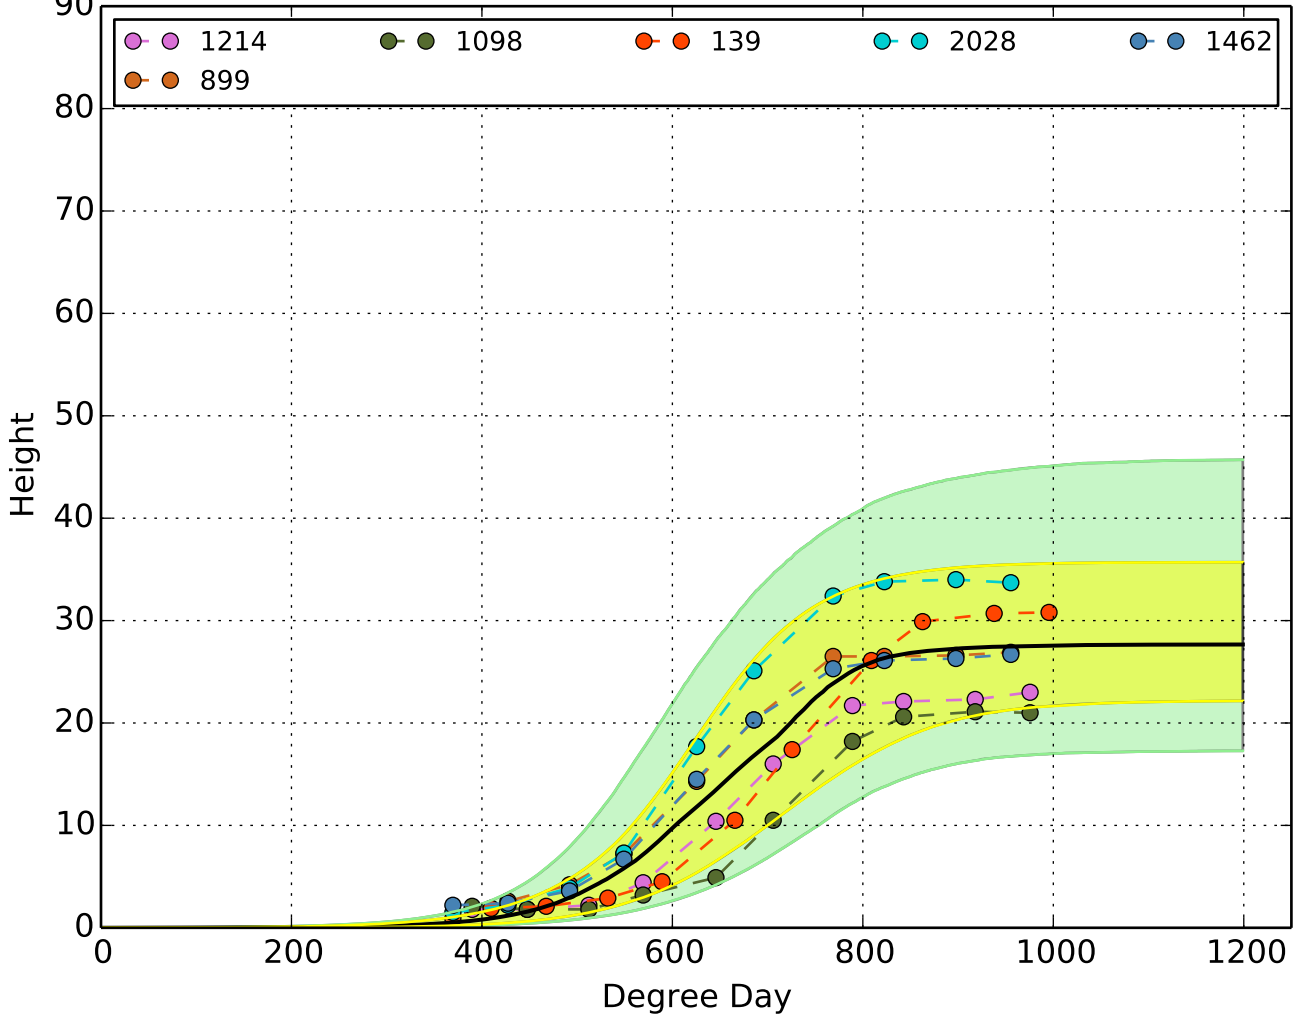

HeightModel3\_v1\_ResErrModel,Treat= CR\_2012,Line 199 (#Inv=7);95CI GrowthCurves

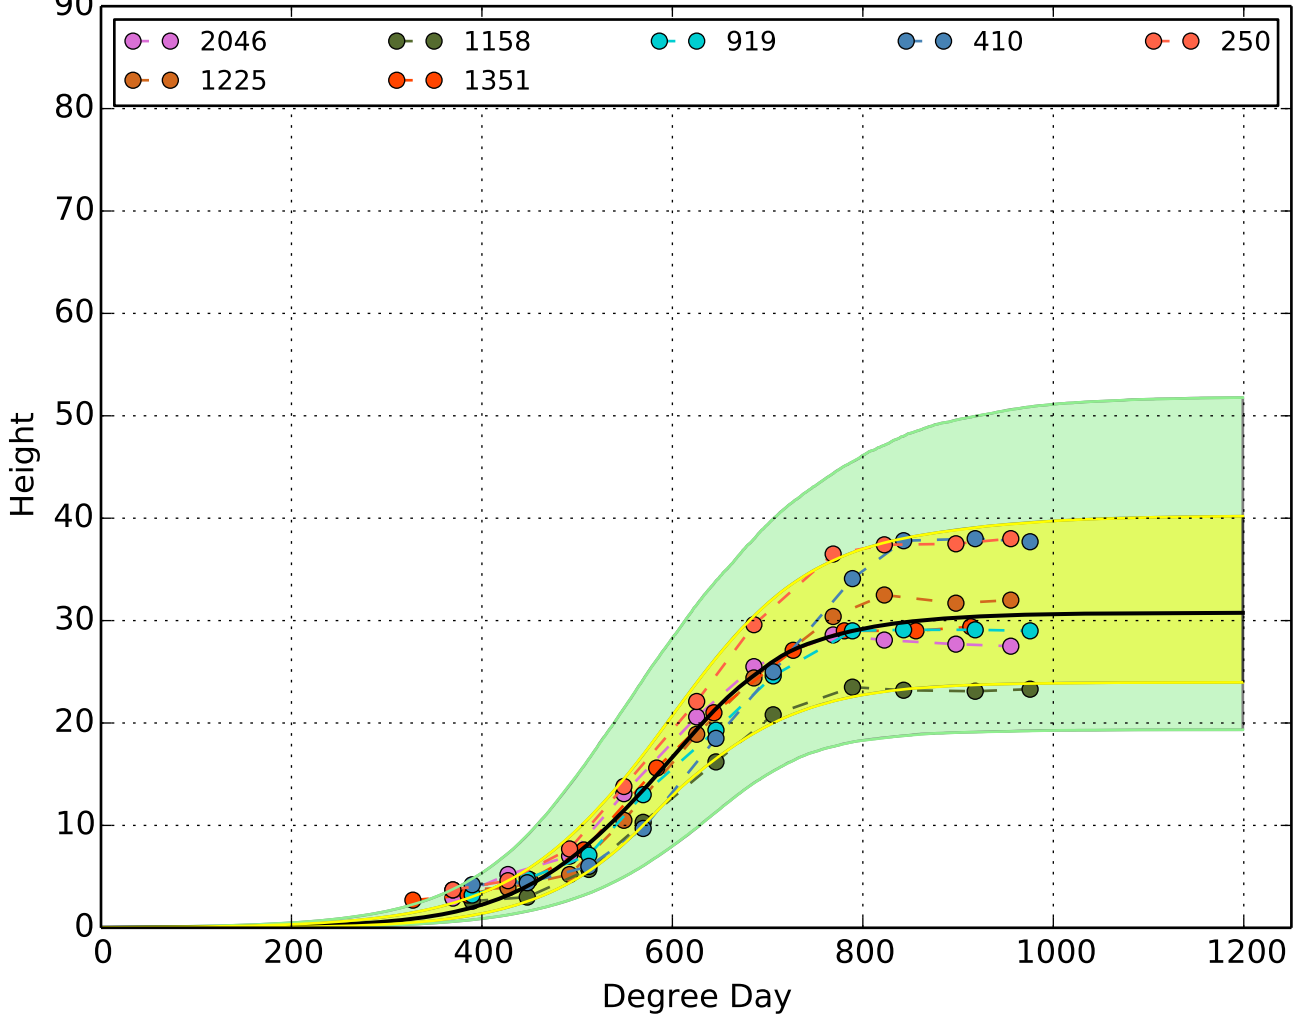

HeightModel3\_v1\_ResErrModel,Treat= CR\_2012,Line 201 (#Inv=8);95CI GrowthCurves

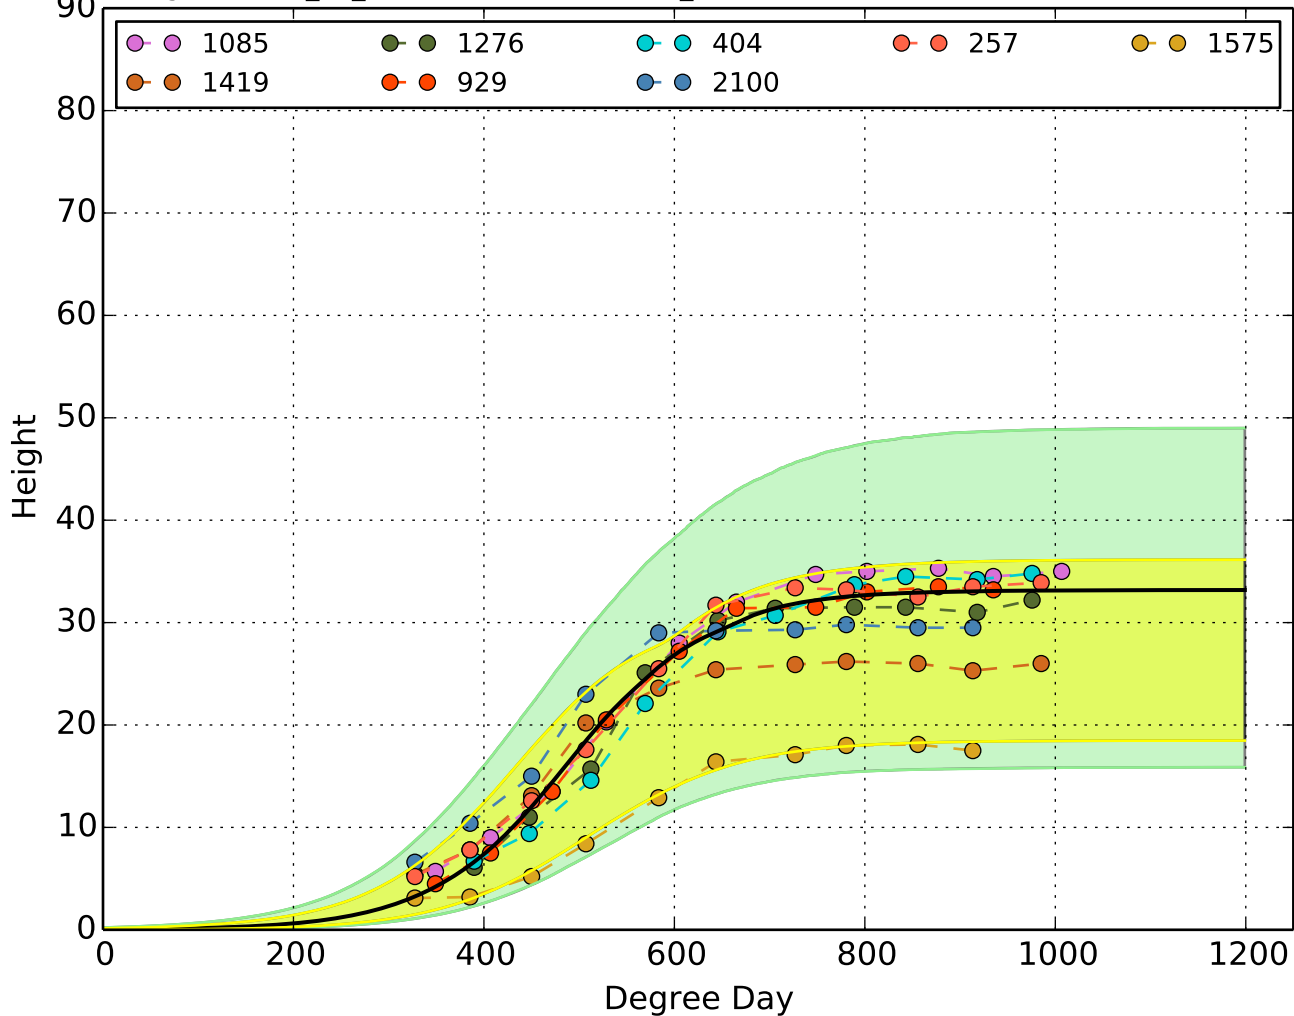

HeightModel3\_v1\_ResErrModel,Treat= CR\_2012,Line 204 (#Inv=6);95CI GrowthCurves

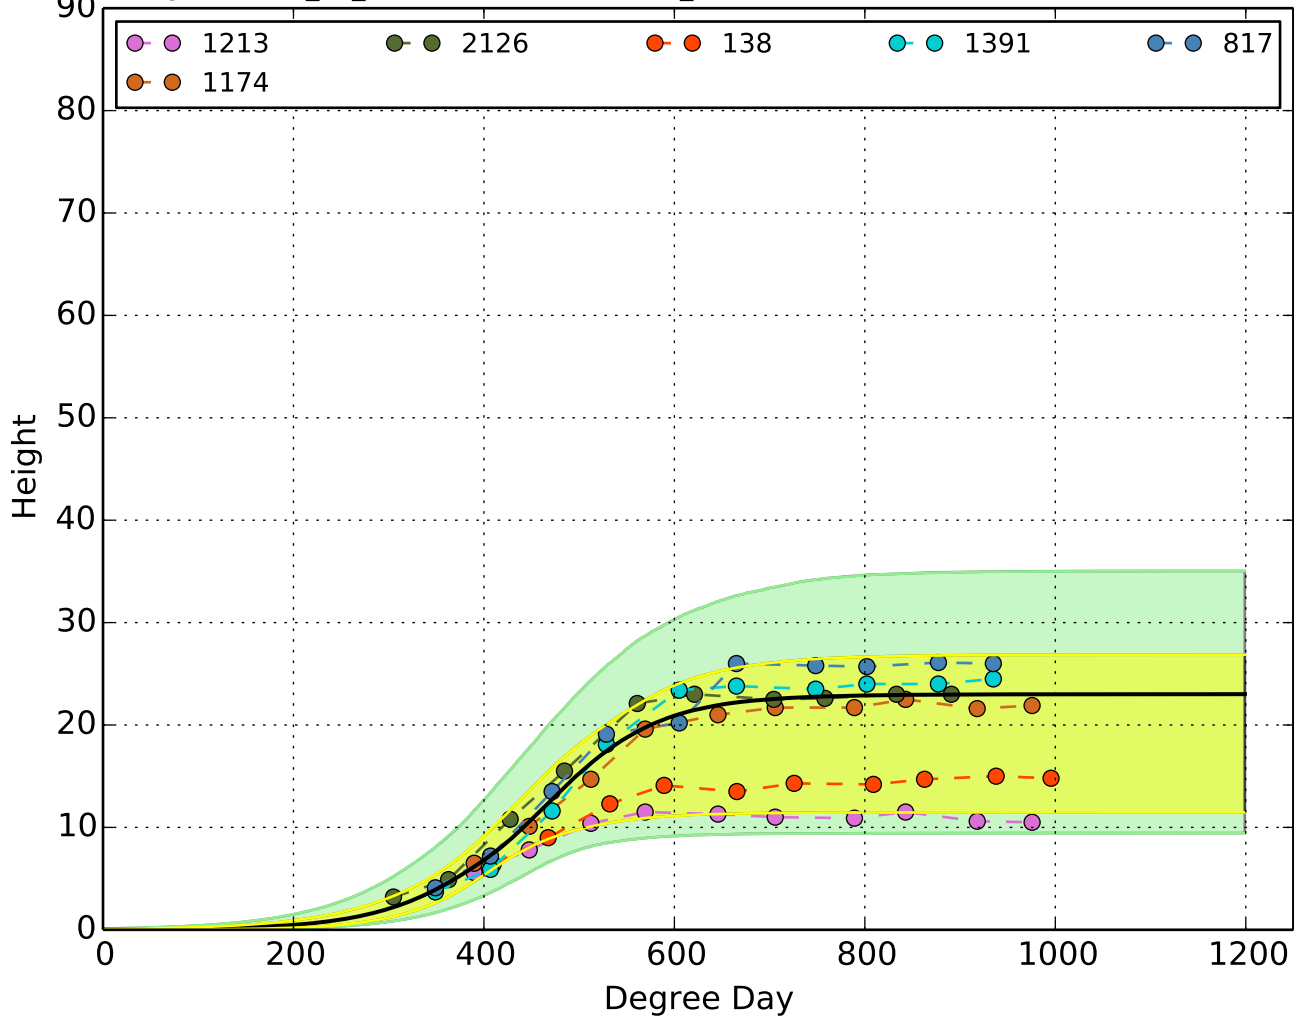

HeightModel3\_v1\_ResErrModel,Treat= CR\_2012,Line 205 (#Inv=6);95CI GrowthCurves

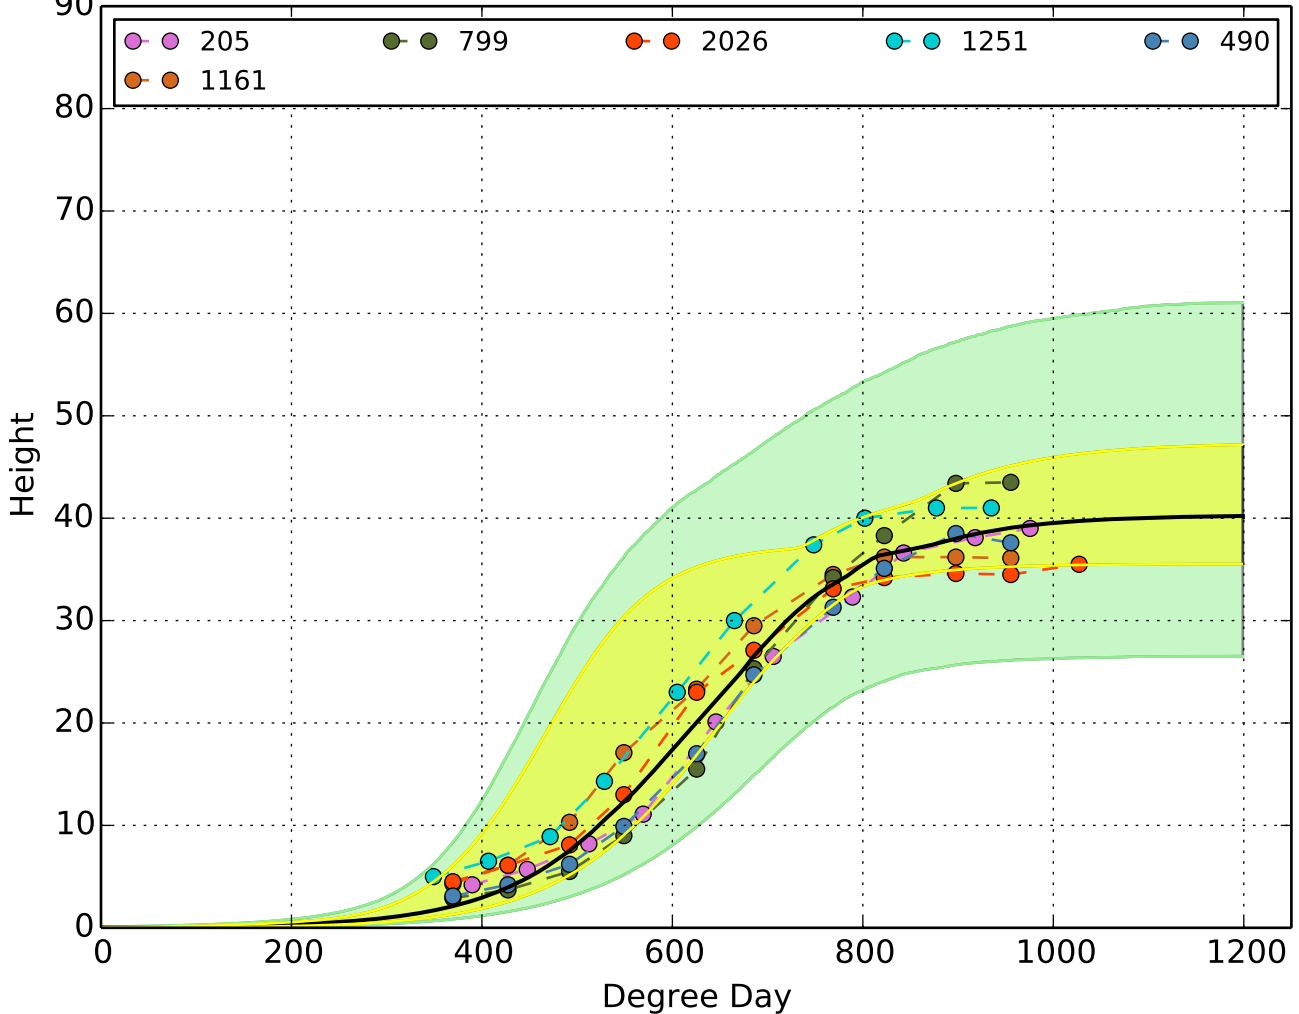



HeightModel3\_v1\_ResErrModel,Treat= CR\_2012,Line 206 (#Inv=7);95CI GrowthCurves

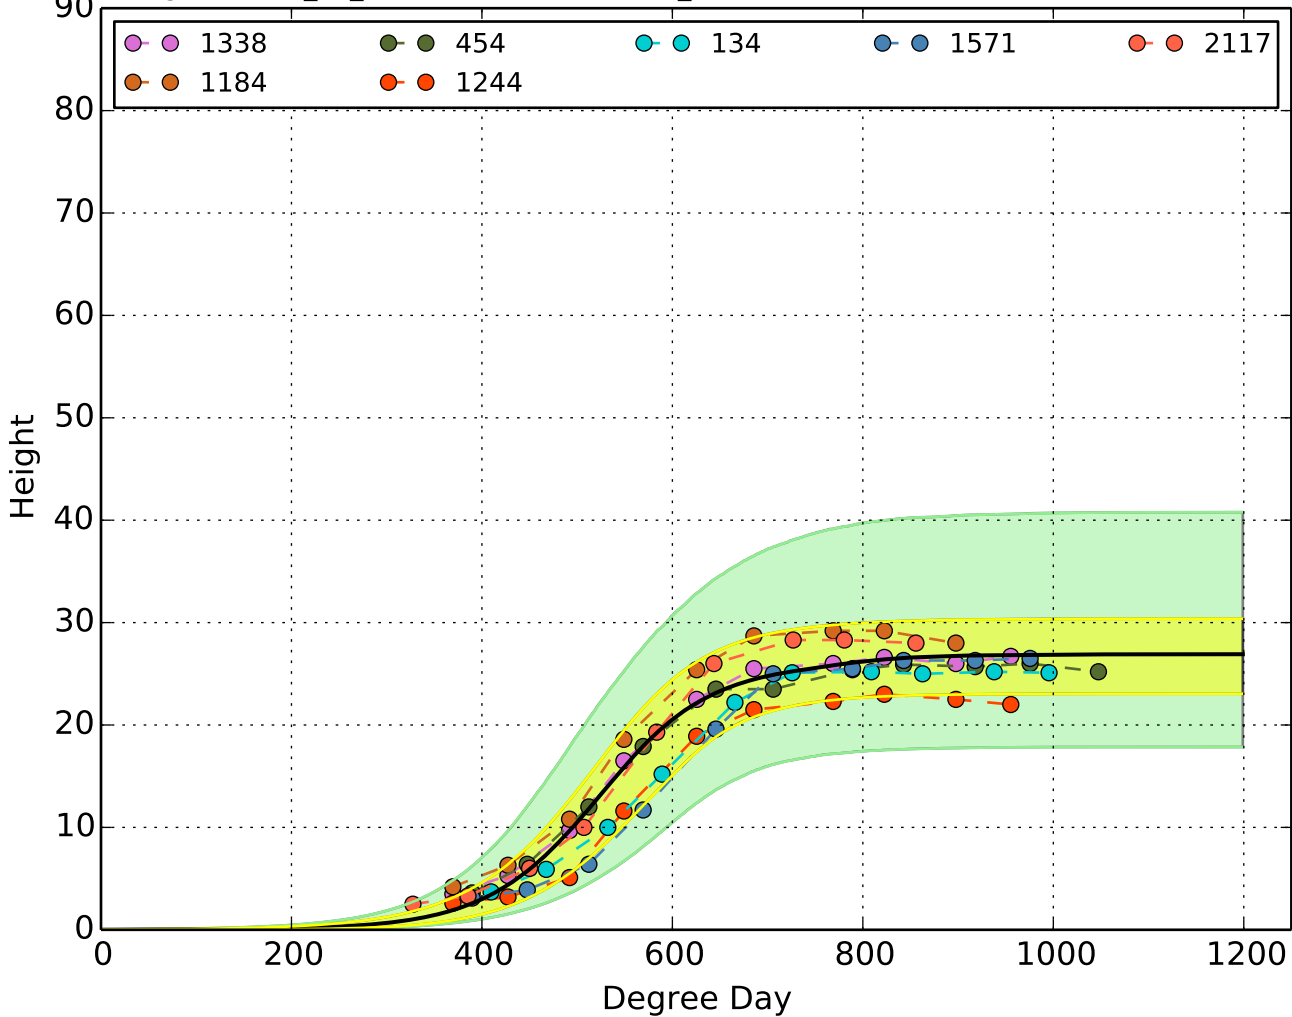

HeightModel3\_v1\_ResErrModel,Treat= CR\_2012,Line 207 (#Inv=6);95CI GrowthCurves

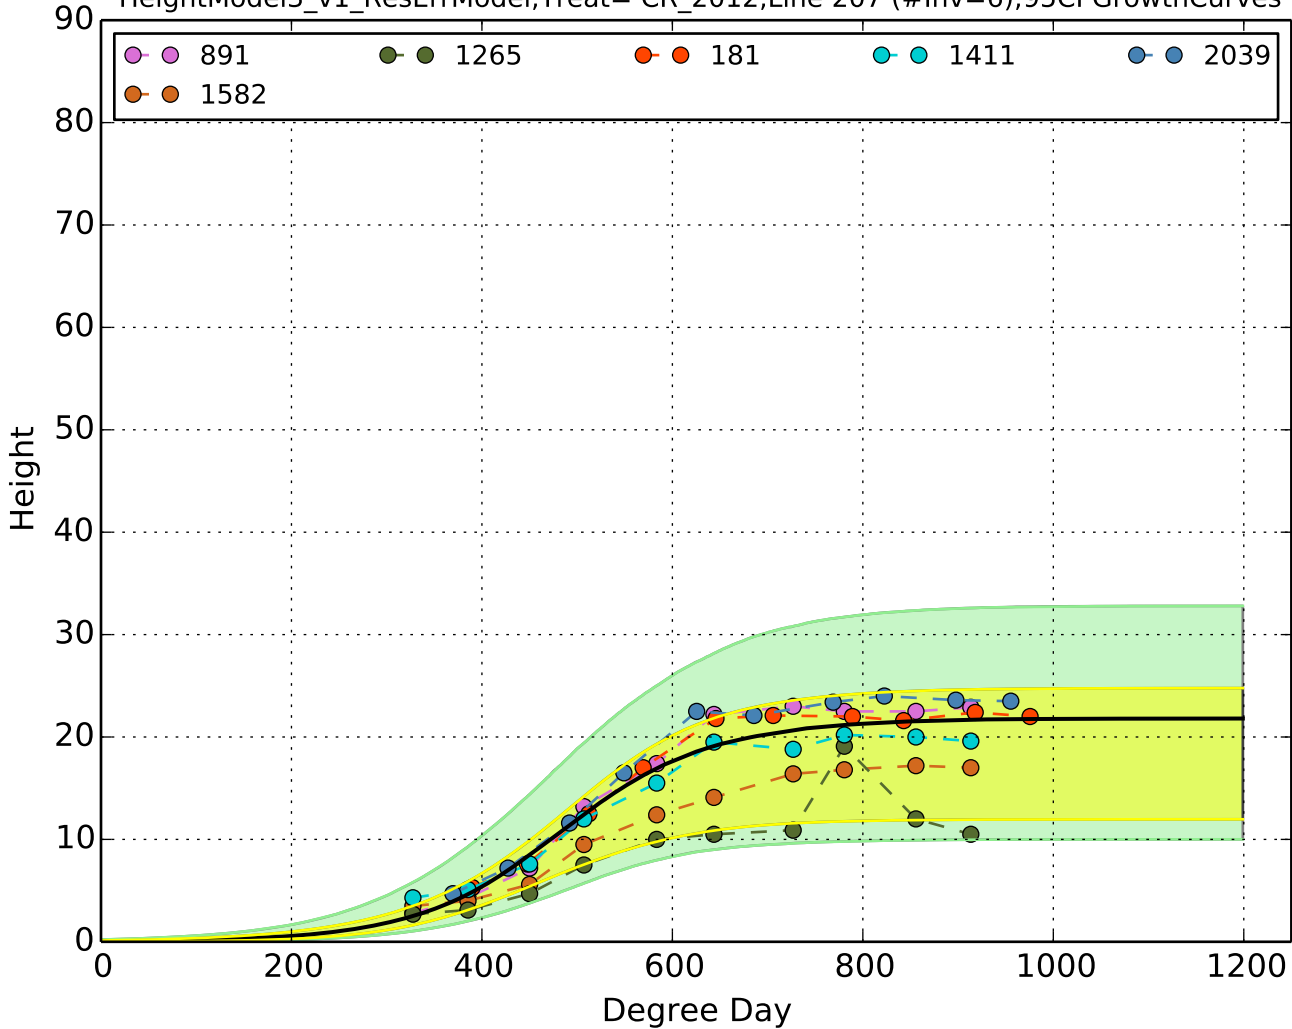

HeightModel3\_v1\_ResErrModel,Treat= CR\_2012,Line 208 (#Inv=7);95CI GrowthCurves

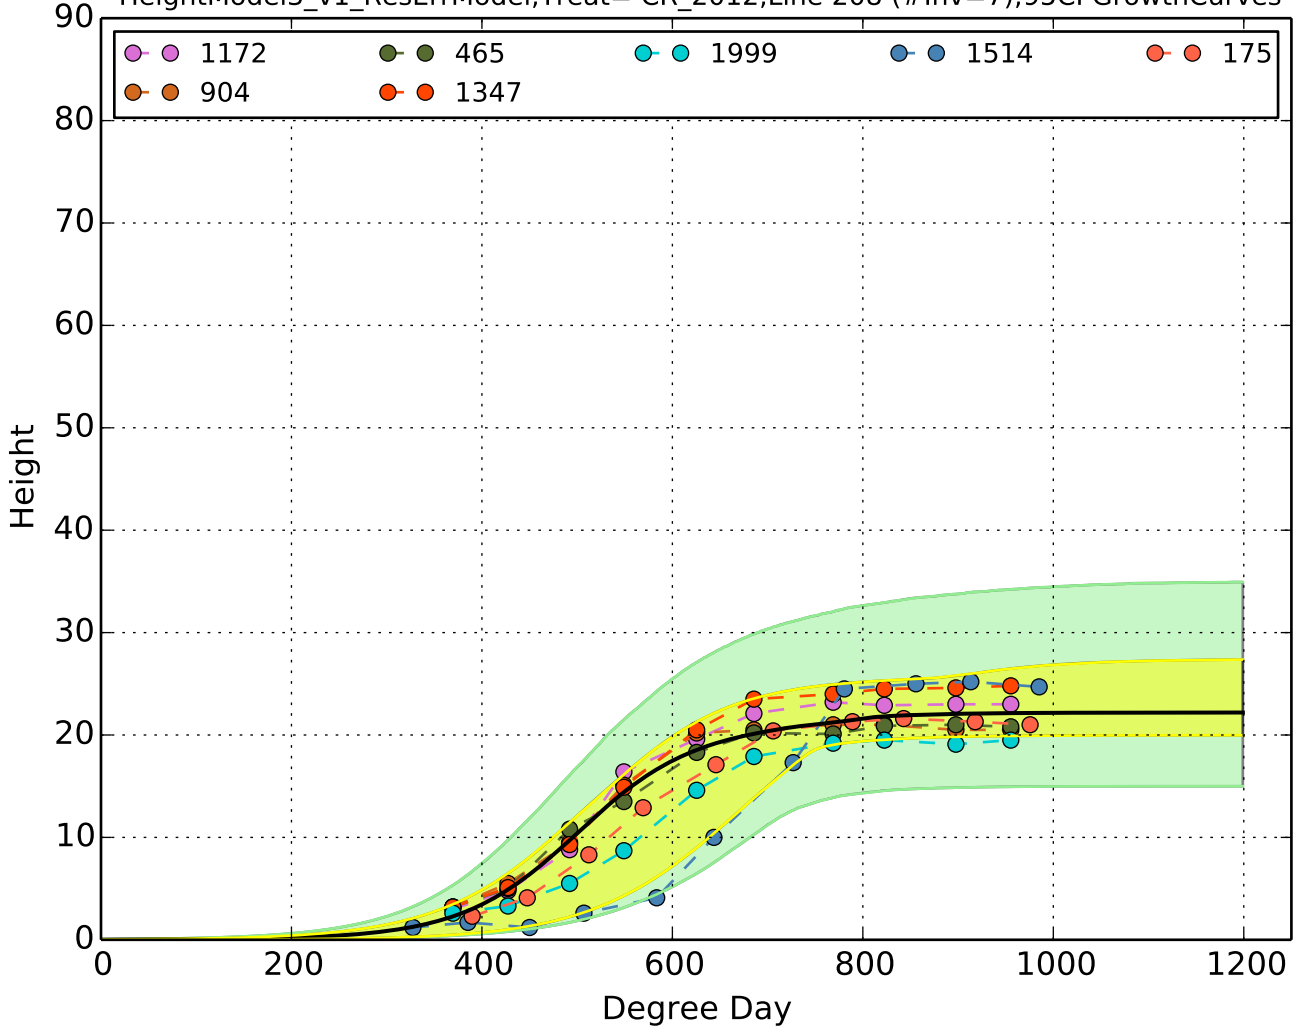

HeightModel3\_v1\_ResErrModel,Treat= CR\_2012,Line 211 (#Inv=8);95CI GrowthCurves

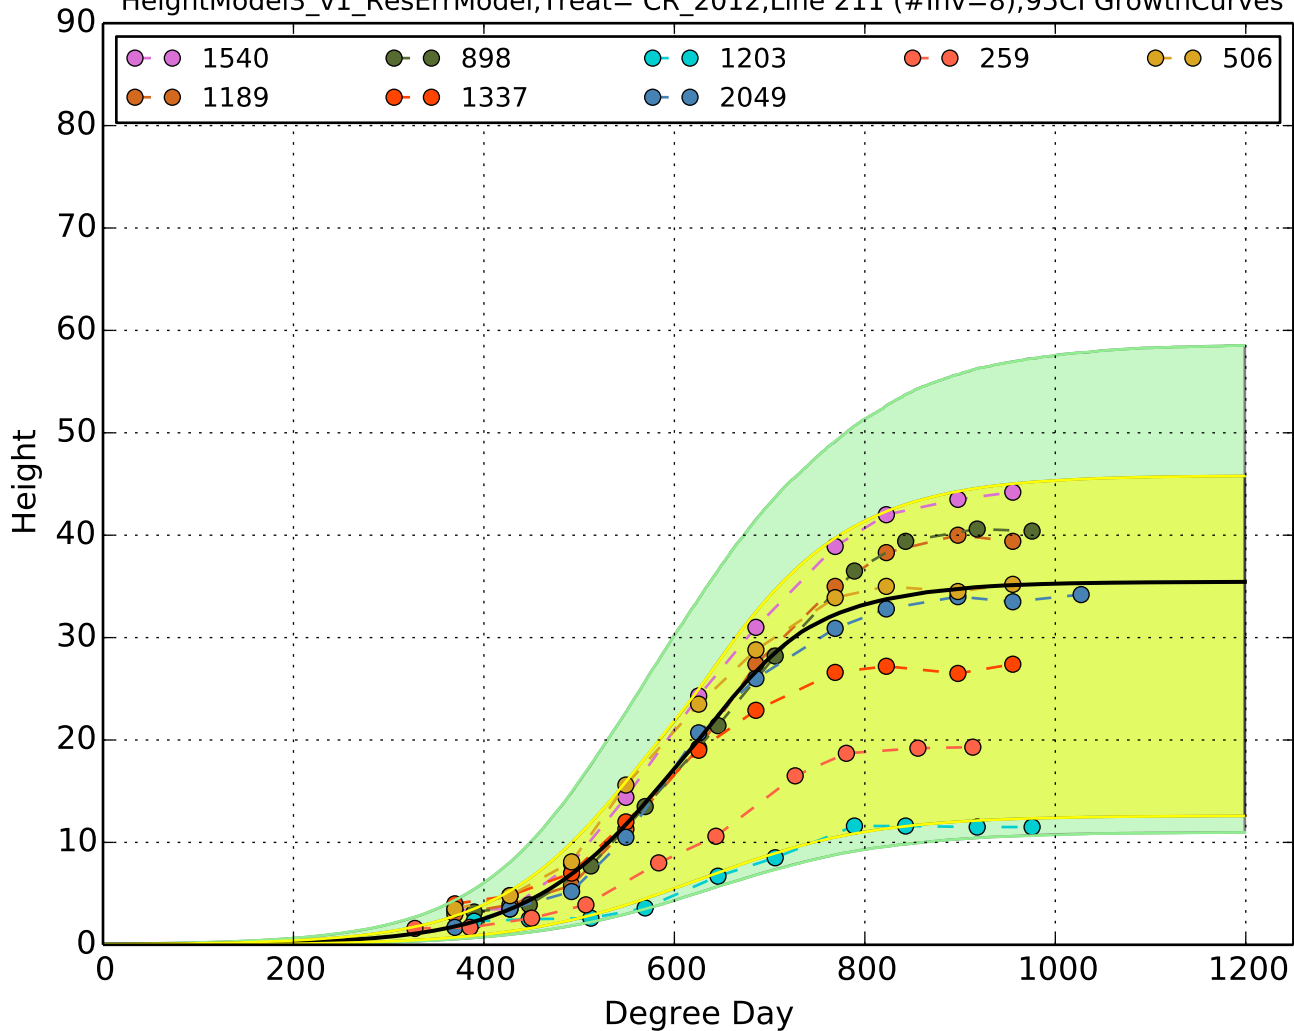

HeightModel3\_v1\_ResErrModel,Treat= CR\_2012,Line 212 (#Inv=8);95CI GrowthCurves

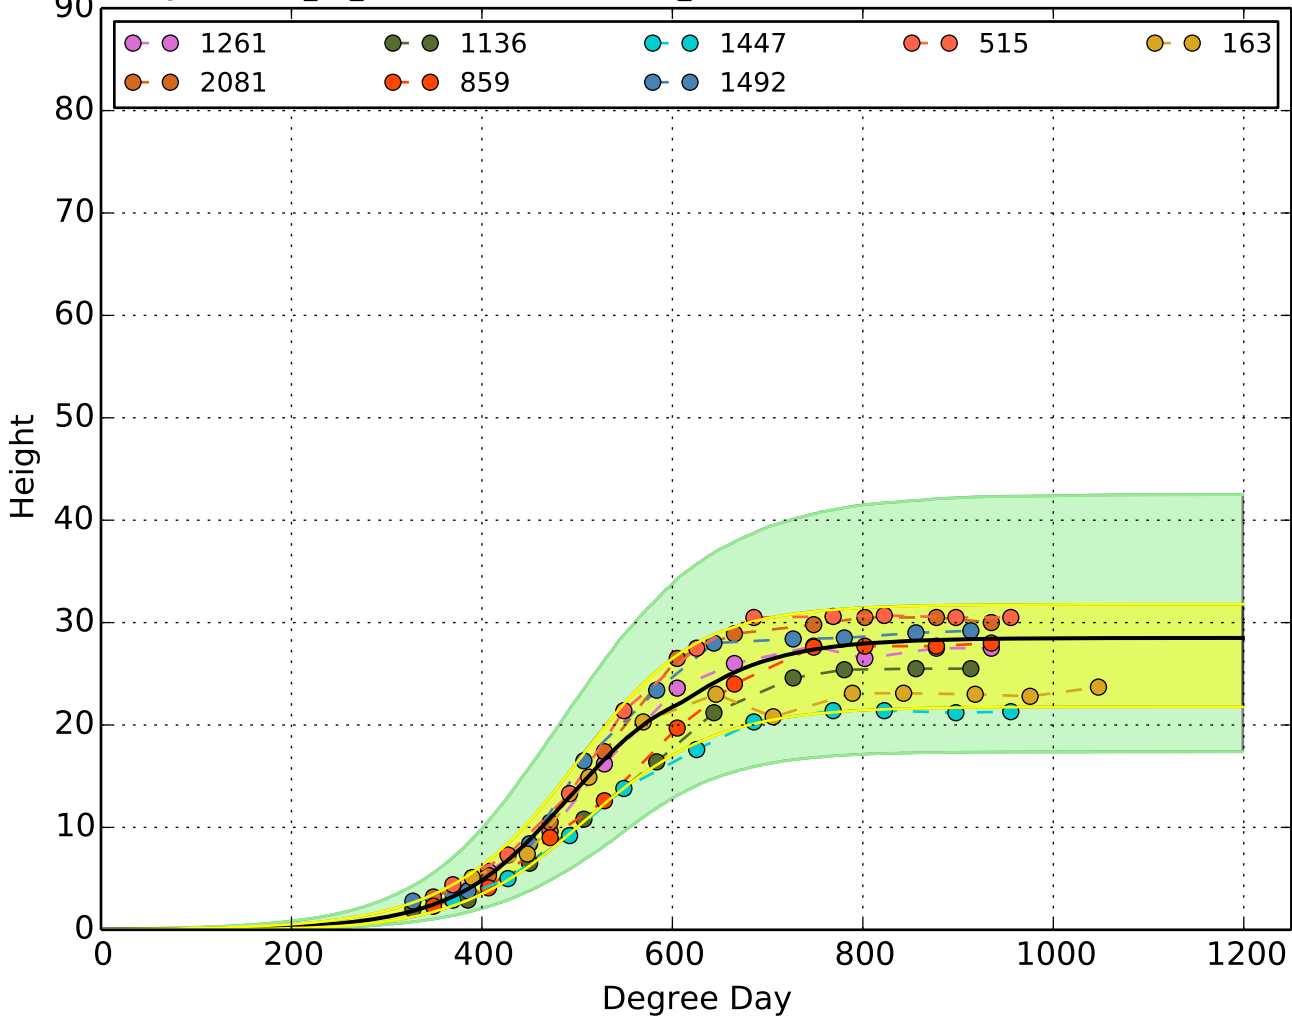

HeightModel3\_v1\_ResErrModel,Treat= CR\_2012,Line 213 (#Inv=8);95CI GrowthCurves

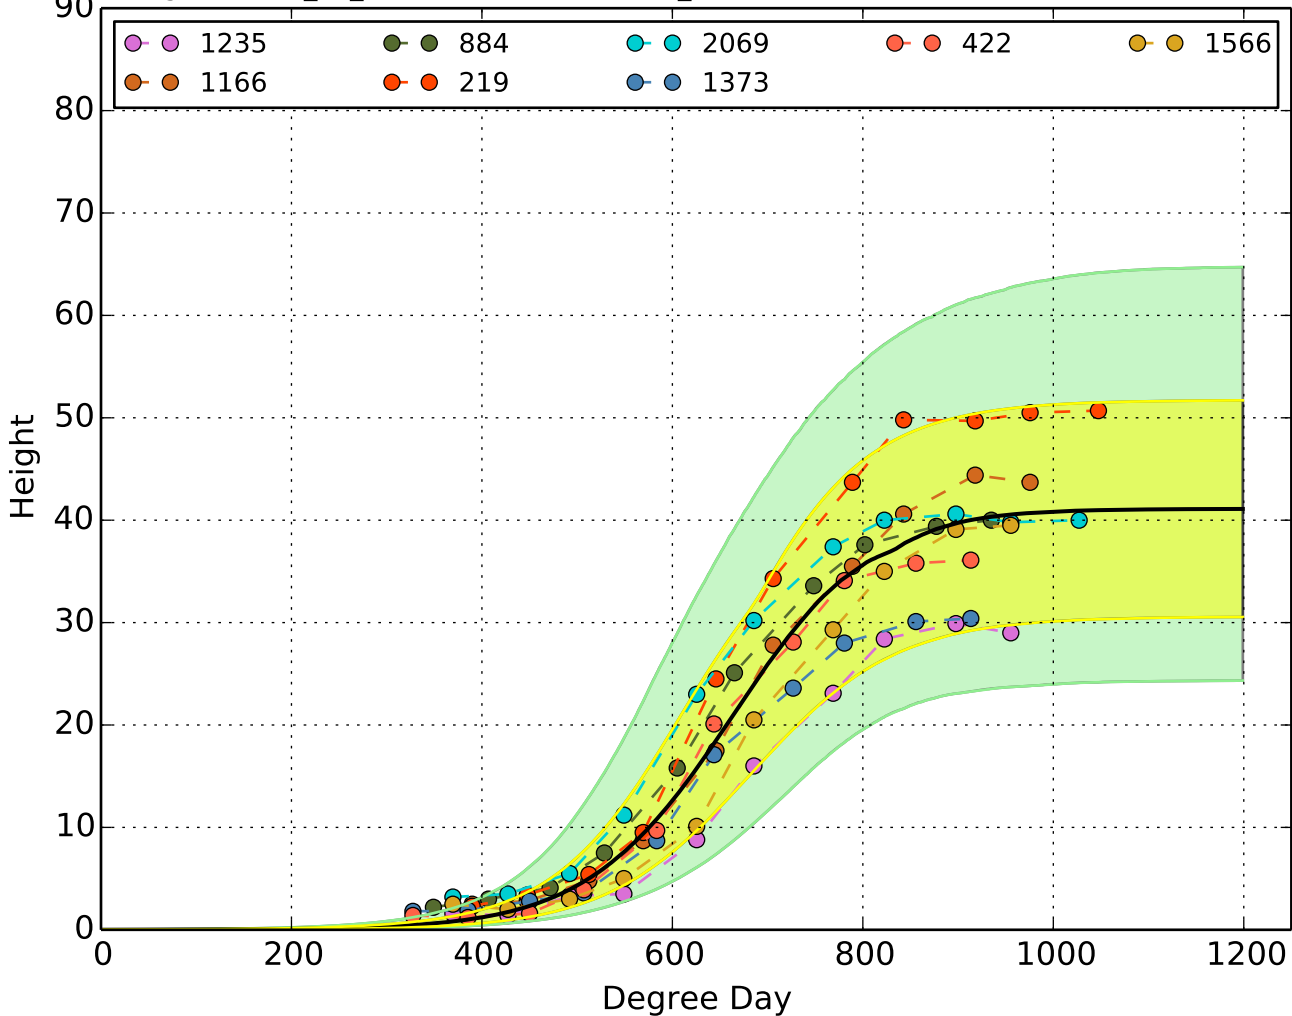

HeightModel3\_v1\_ResErrModel,Treat= CR\_2012,Line 215 (#Inv=7);95CI GrowthCurves

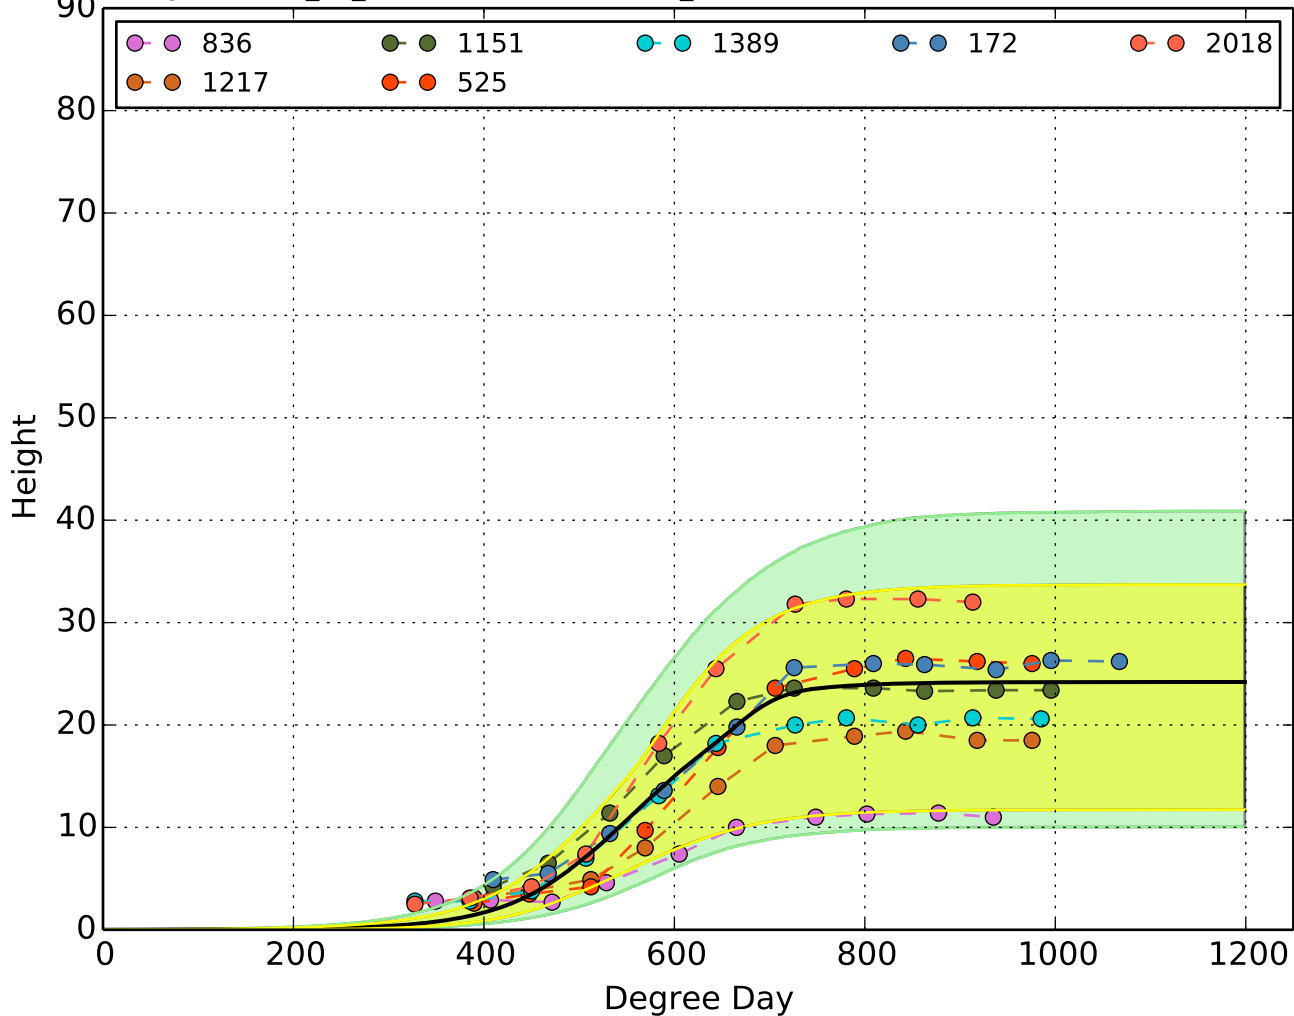

HeightModel3\_v1\_ResErrModel,Treat= CR\_2012,Line 222 (#Inv=8);95CI GrowthCurves

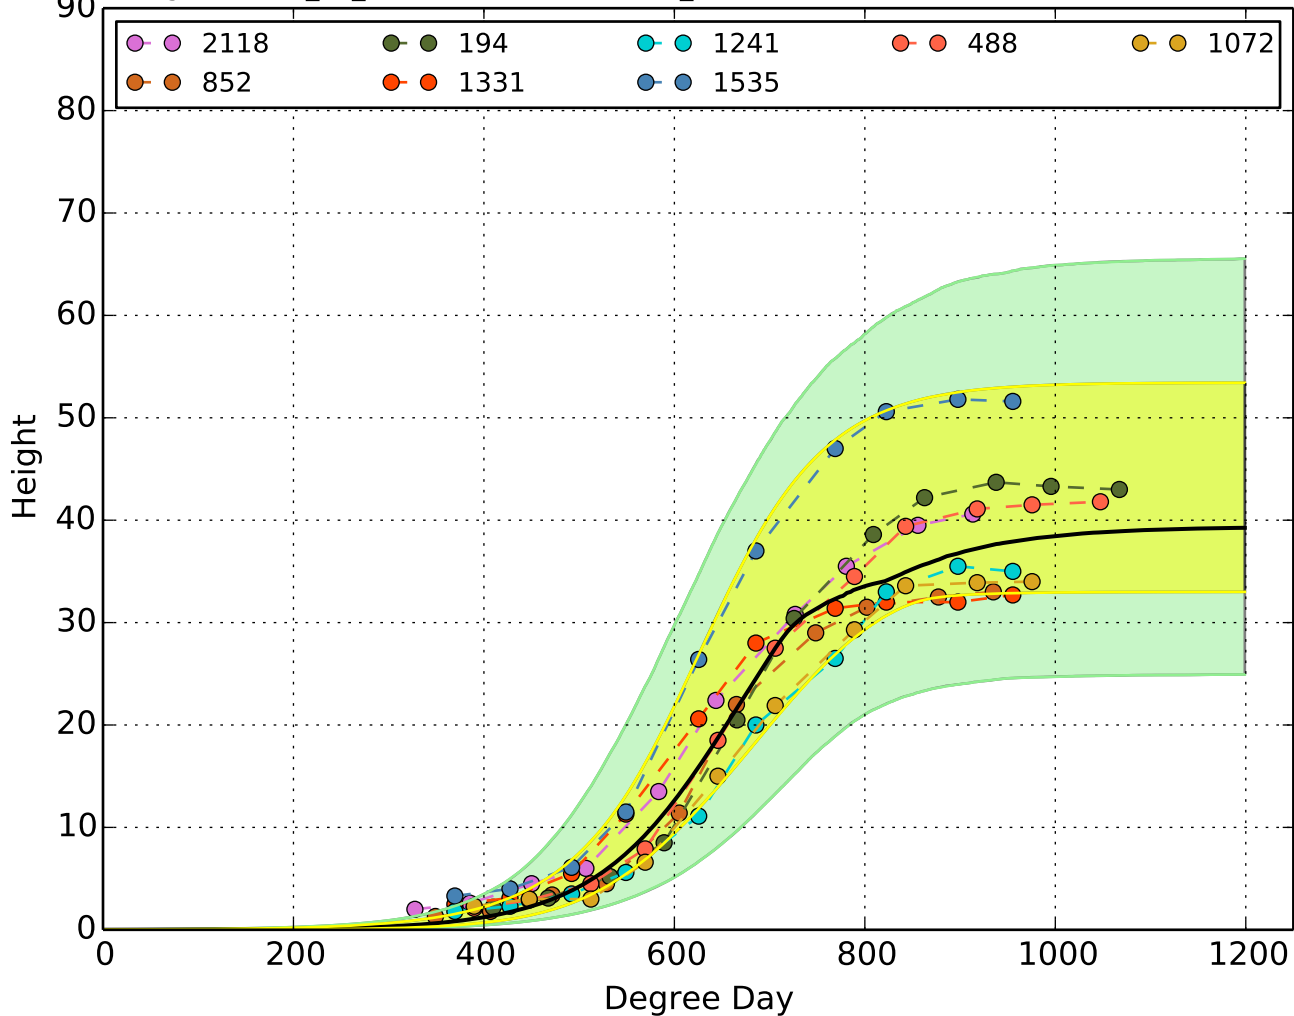



HeightModel3\_v1\_ResErrModel,Treat= CR\_2012,Line 223 (#Inv=6);95CI GrowthCurves

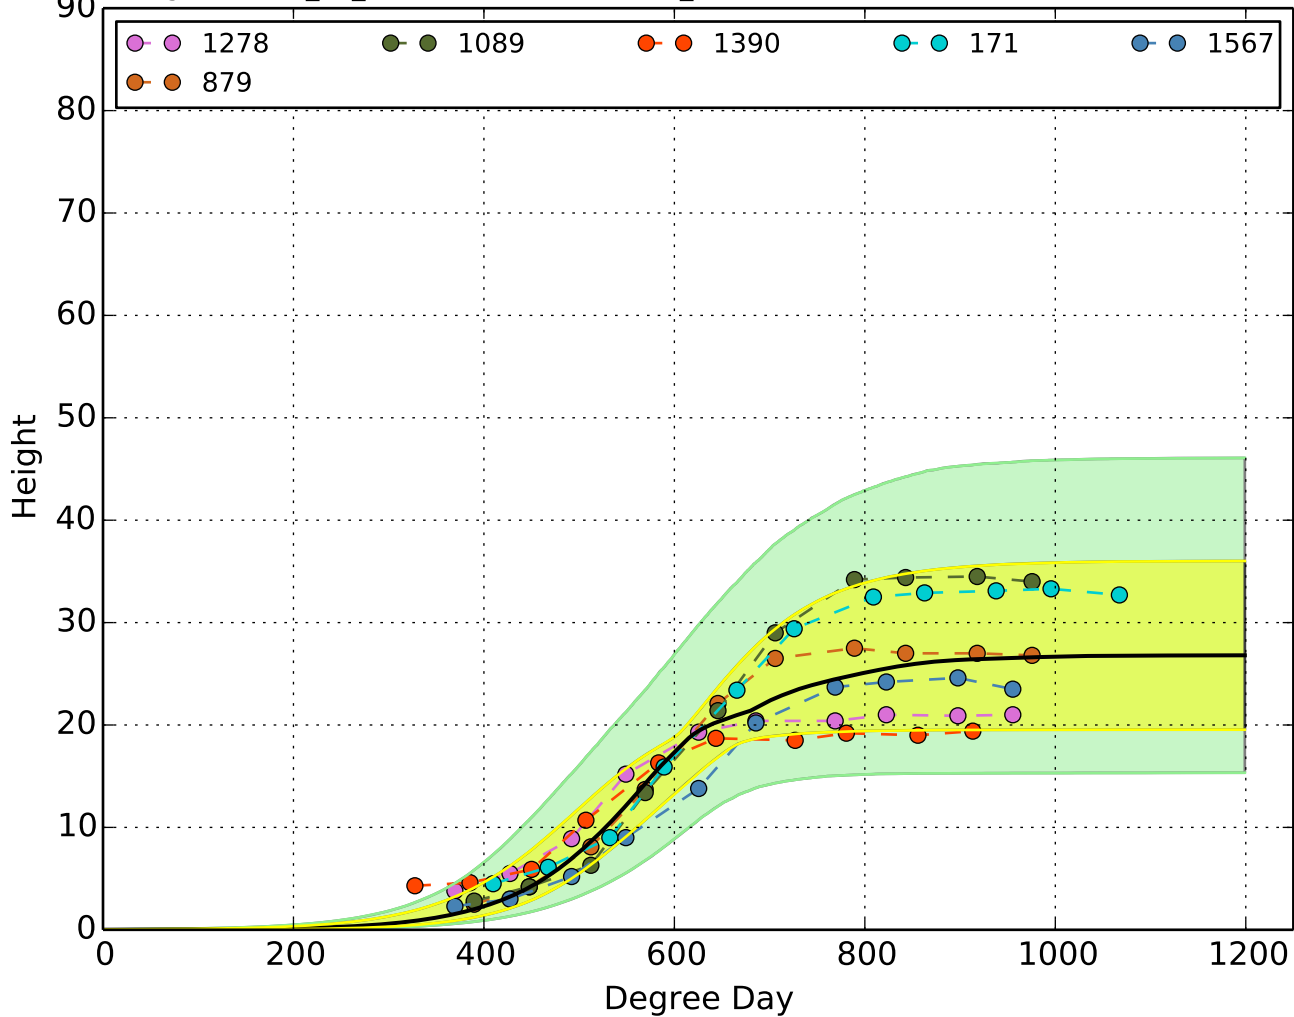

HeightModel3\_v1\_ResErrModel,Treat= CR\_2012,Line 225 (#Inv=8);95CI GrowthCurves

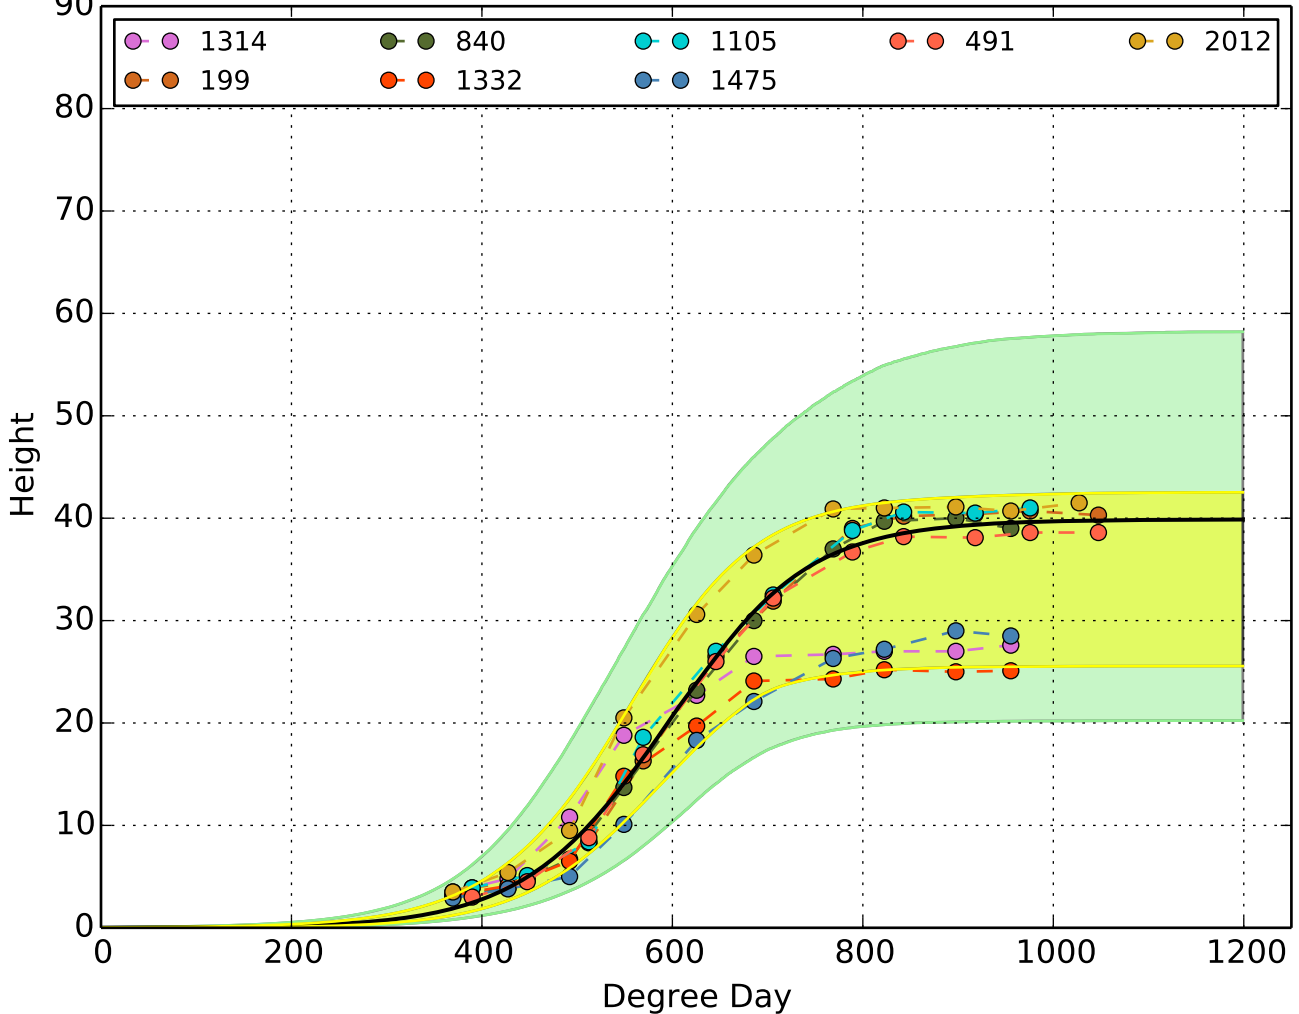

HeightModel3\_v1\_ResErrModel,Treat= CR\_2012,Line 228 (#Inv=7);95CI GrowthCurves

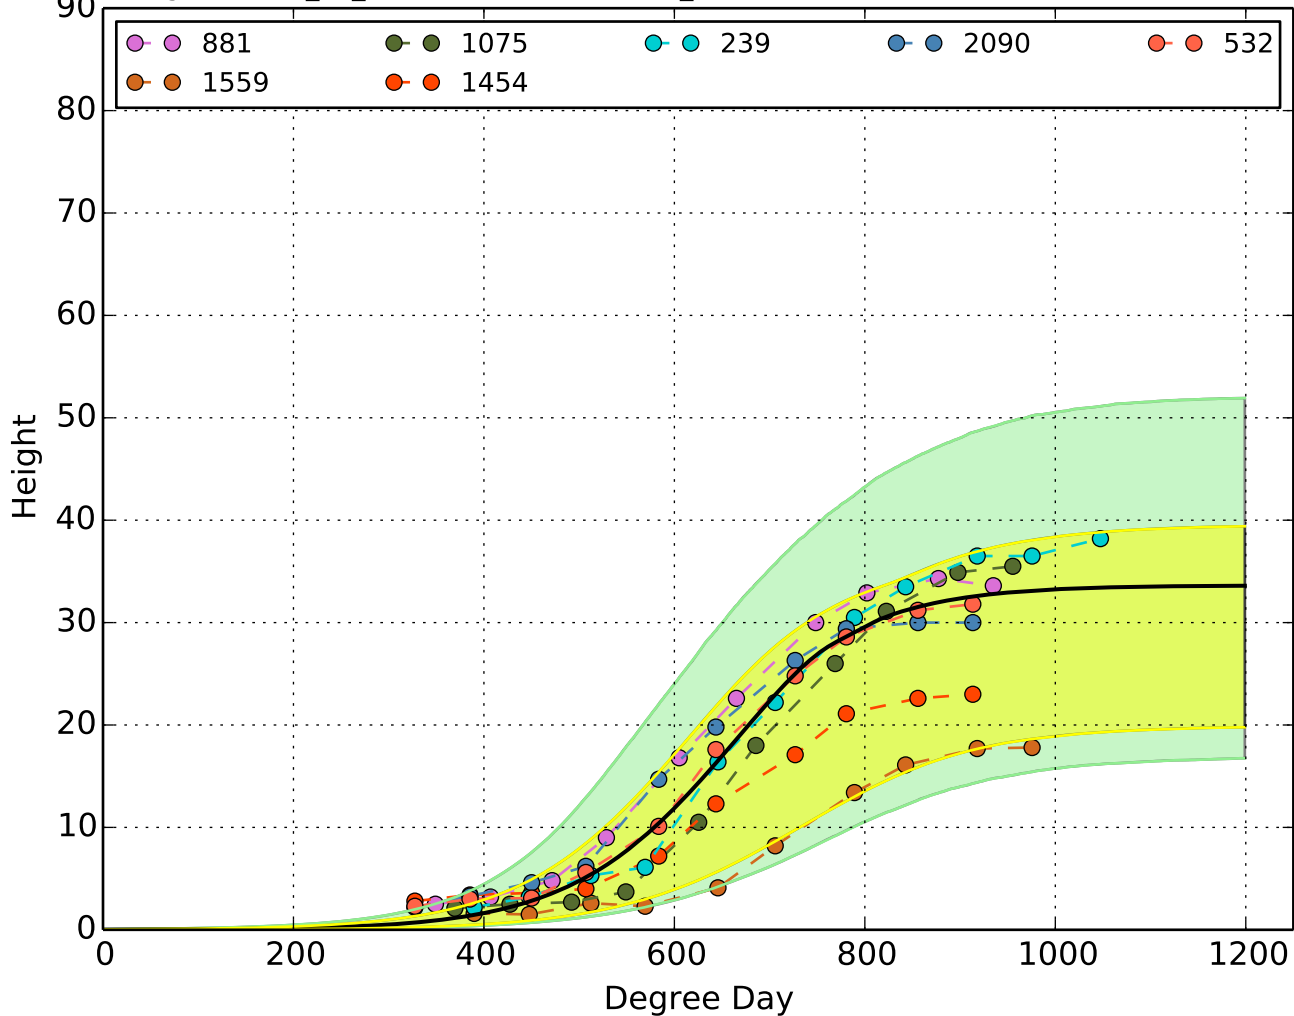

HeightModel3\_v1\_ResErrModel,Treat= CR\_2012,Line 229 (#Inv=7);95CI GrowthCurves

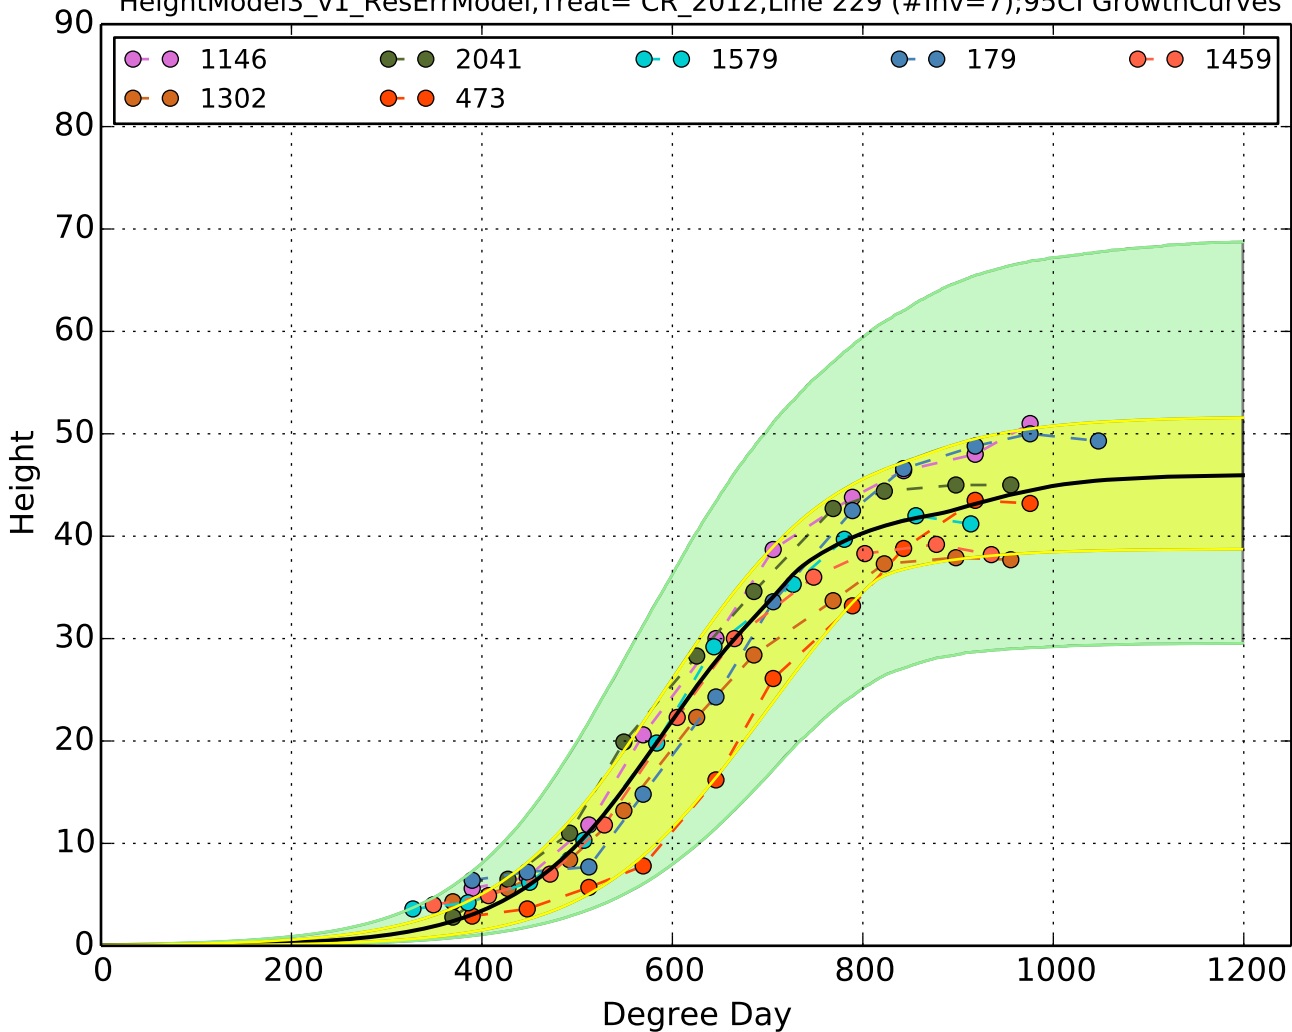

HeightModel3\_v1\_ResErrModel,Treat= CR\_2012,Line 232 (#Inv=7);95CI GrowthCurves

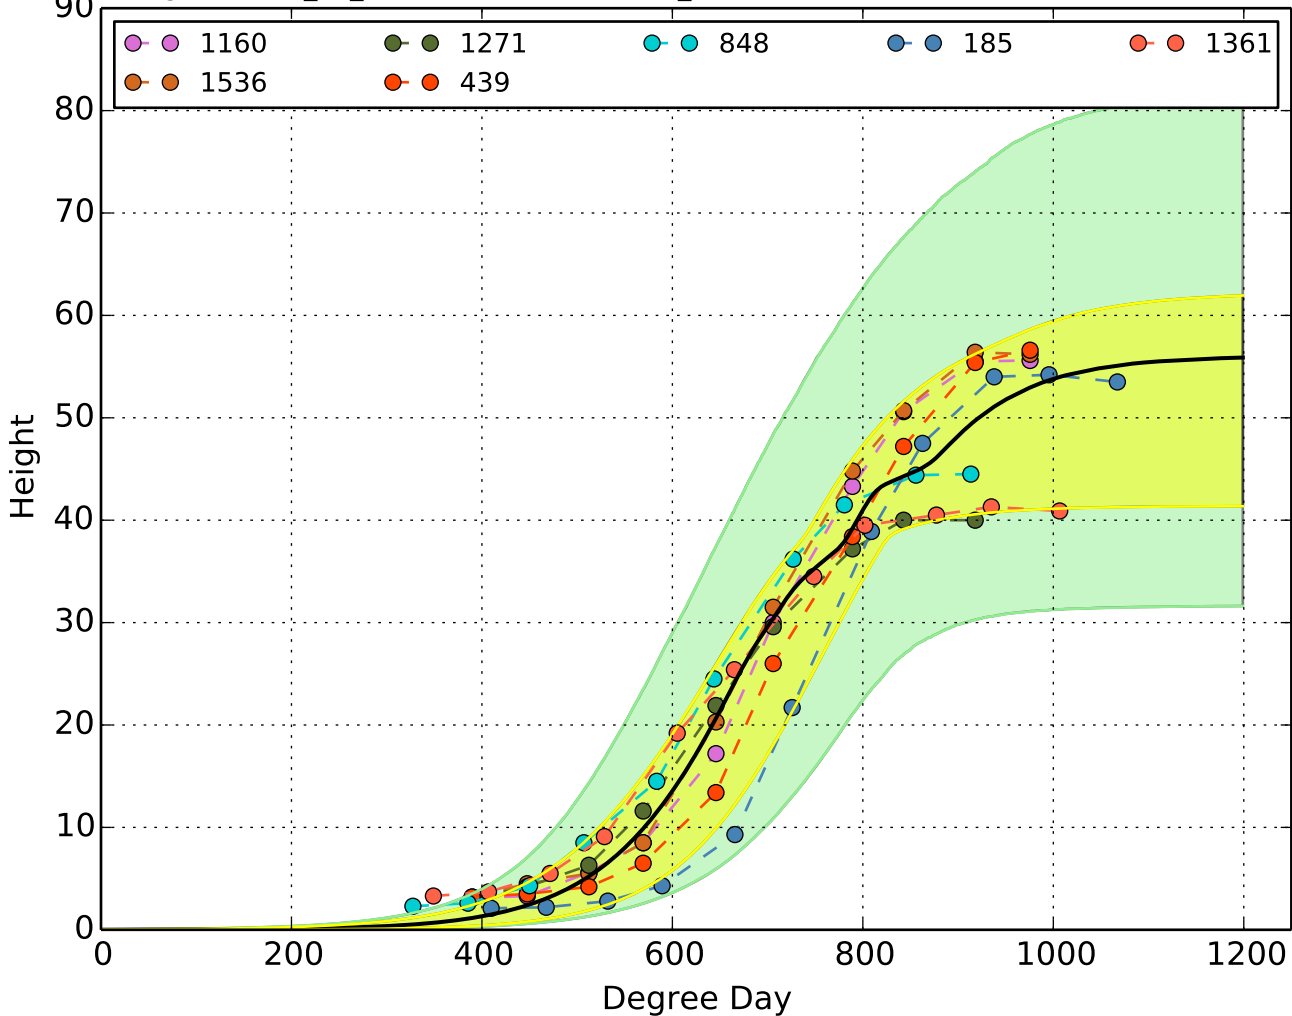

HeightModel3\_v1\_ResErrModel,Treat= CR\_2012,Line 234 (#Inv=8);95CI GrowthCurves

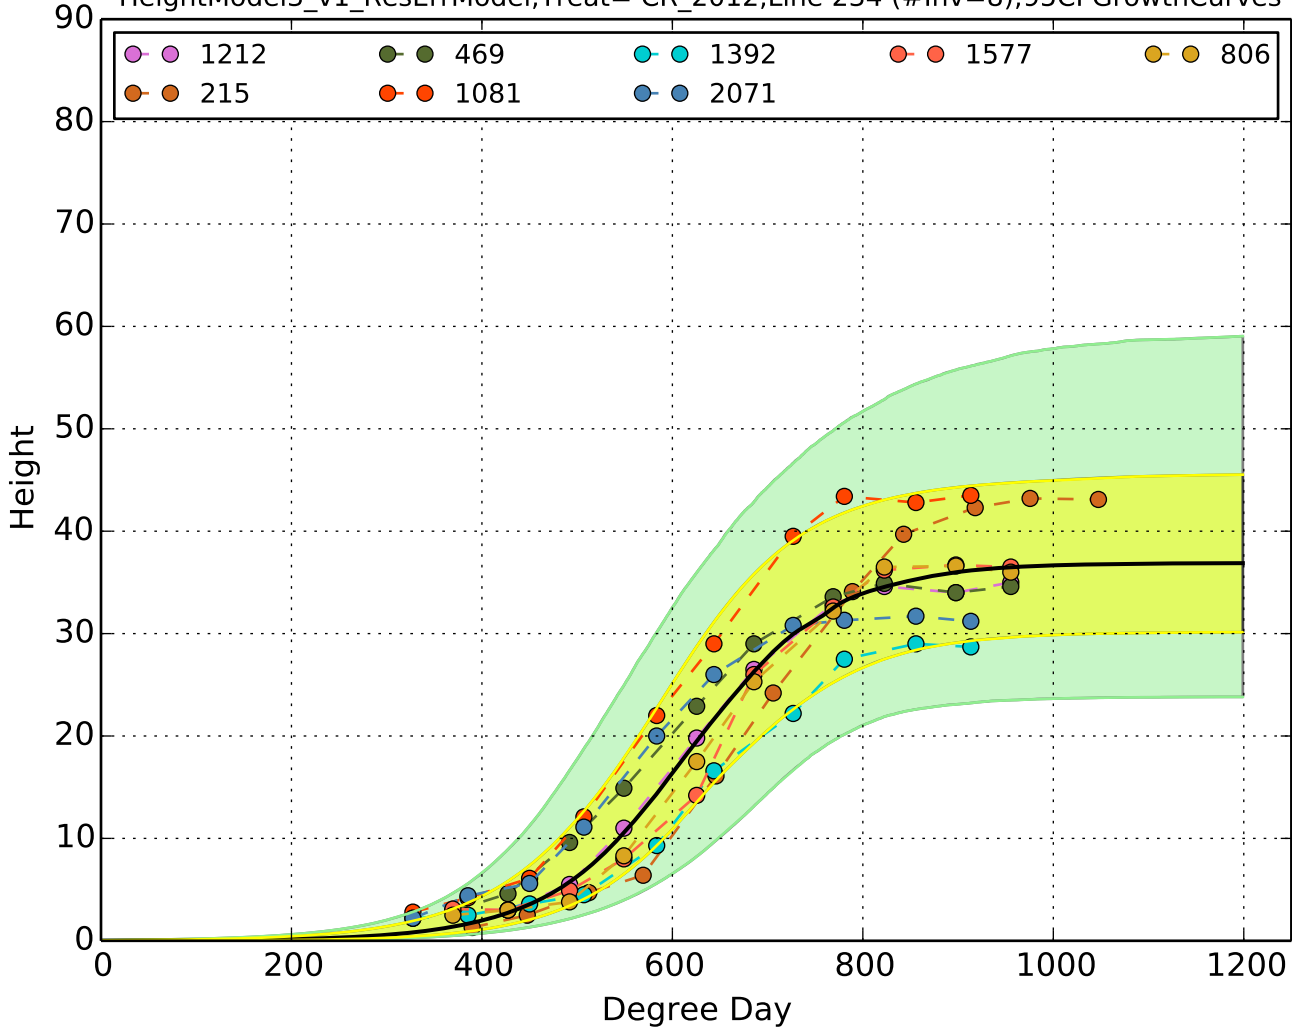

HeightModel3\_v1\_ResErrModel,Treat= CR\_2012,Line 235 (#Inv=7);95CI GrowthCurves

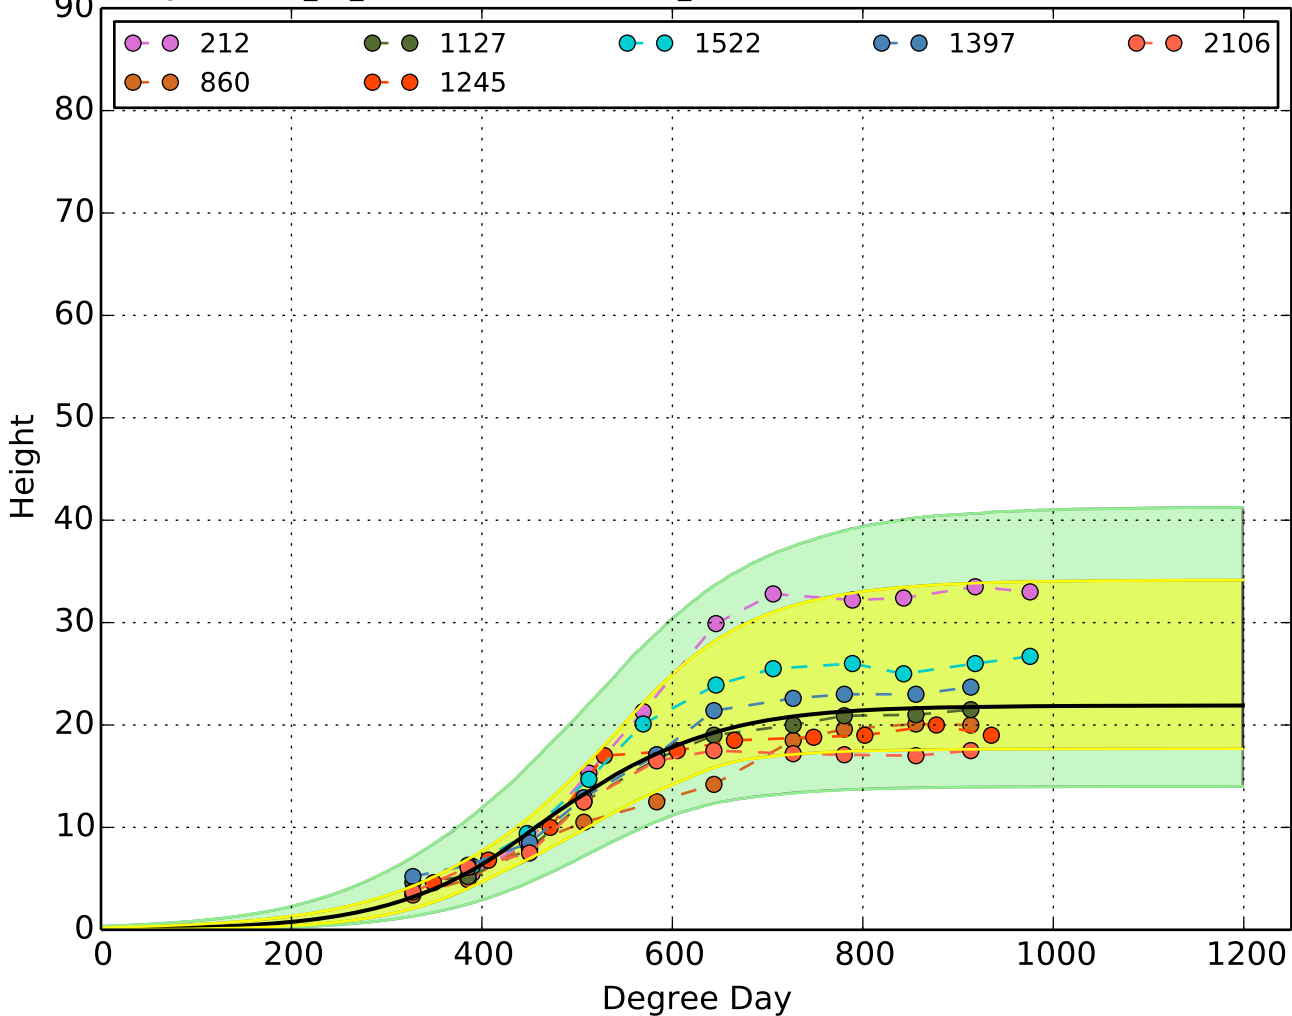

HeightModel3\_v1\_ResErrModel,Treat= CR\_2012,Line 240 (#Inv=5);95CI GrowthCurves

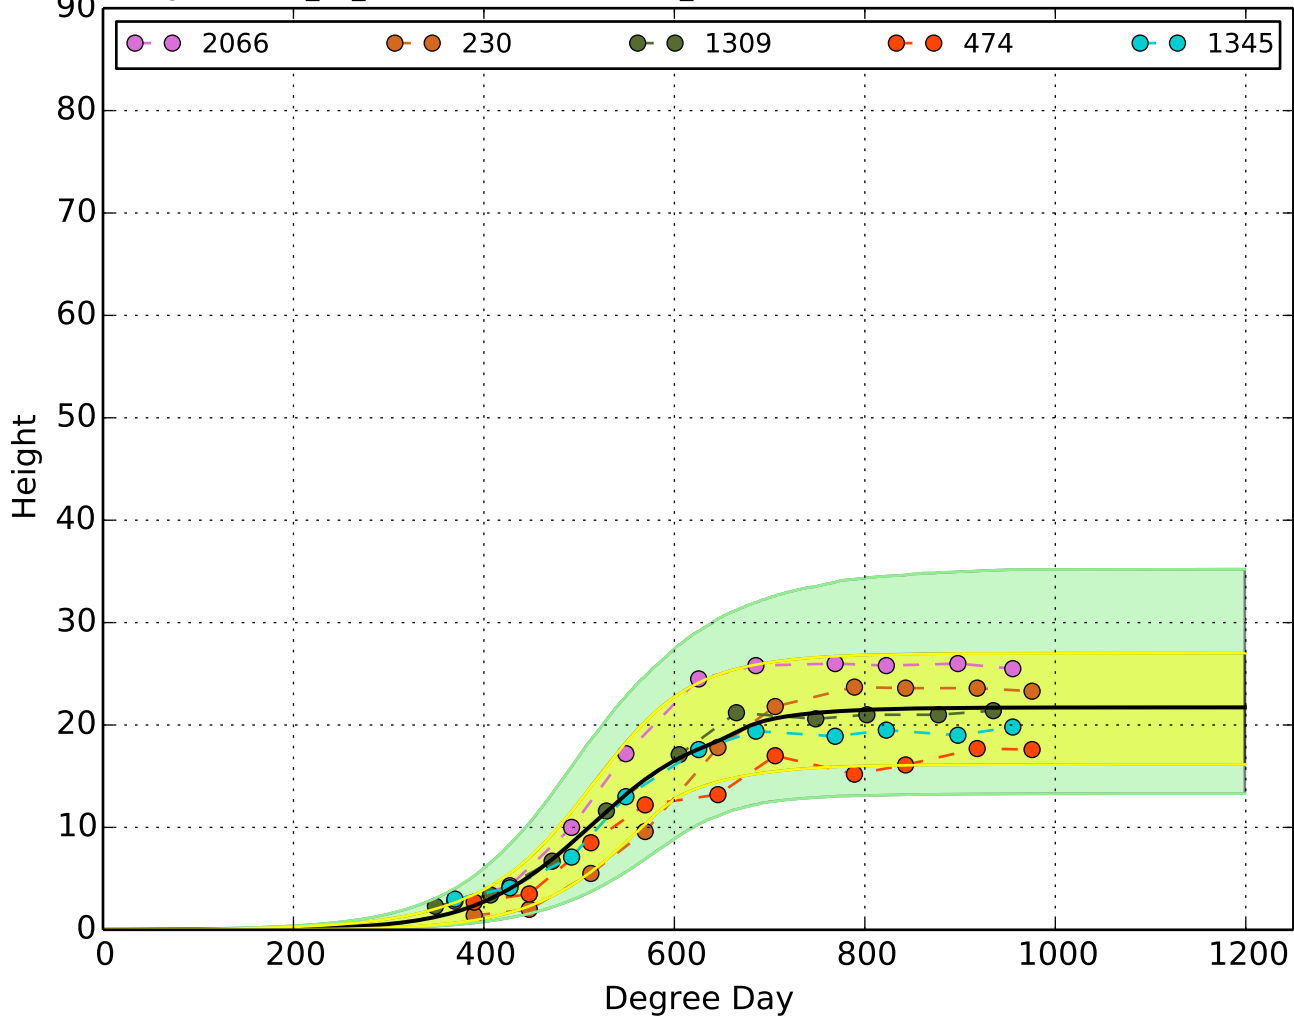



HeightModel3\_v1\_ResErrModel,Treat= CR\_2012,Line 242 (#Inv=8);95CI GrowthCurves

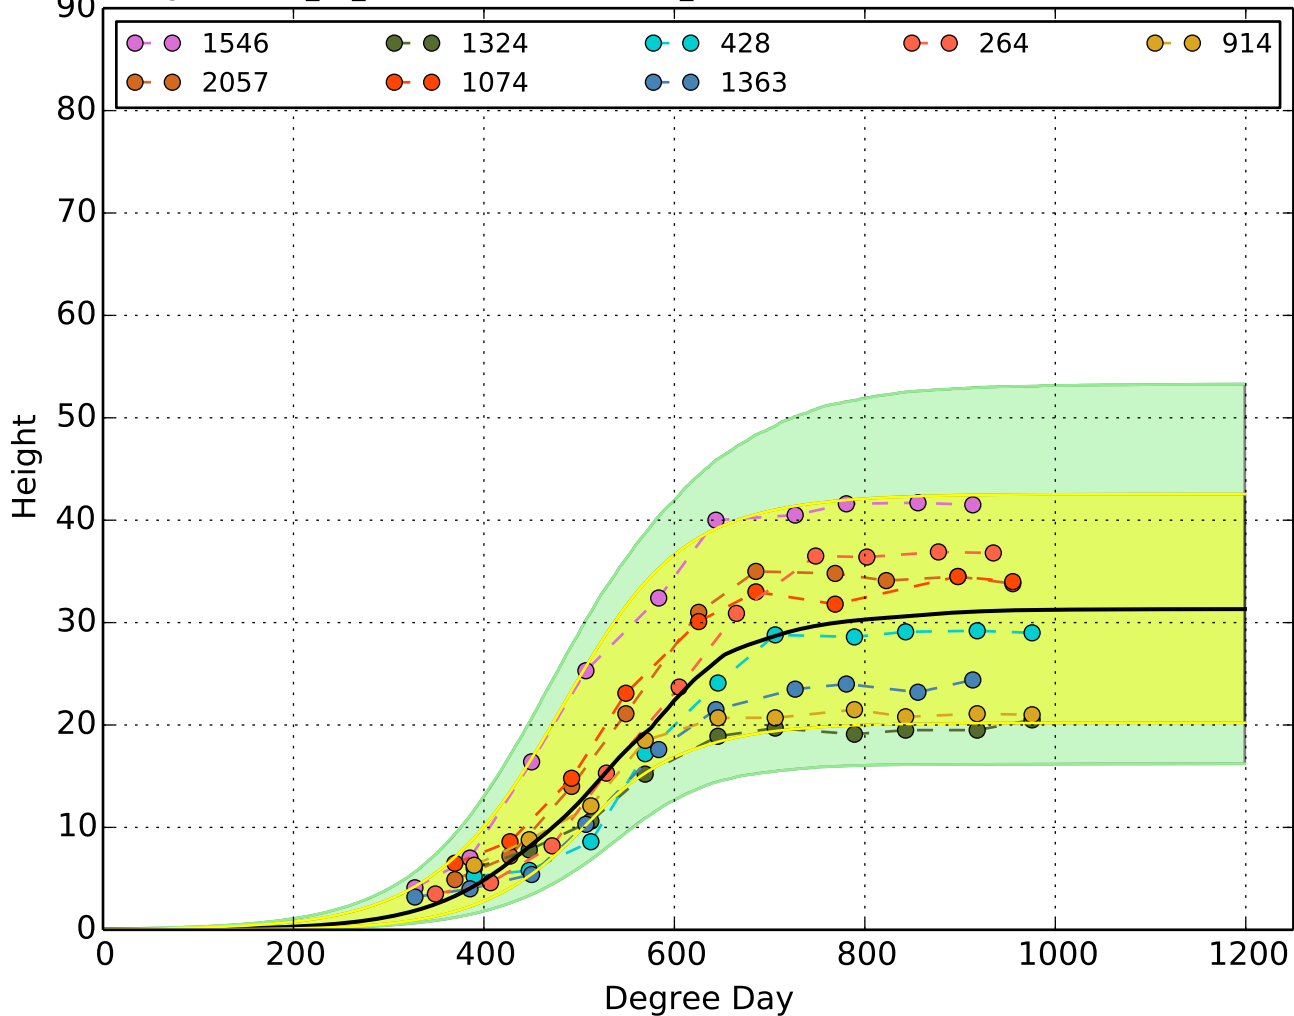

HeightModel3\_v1\_ResErrModel,Treat= CR\_2012,Line 243 (#Inv=7);95CI GrowthCurves

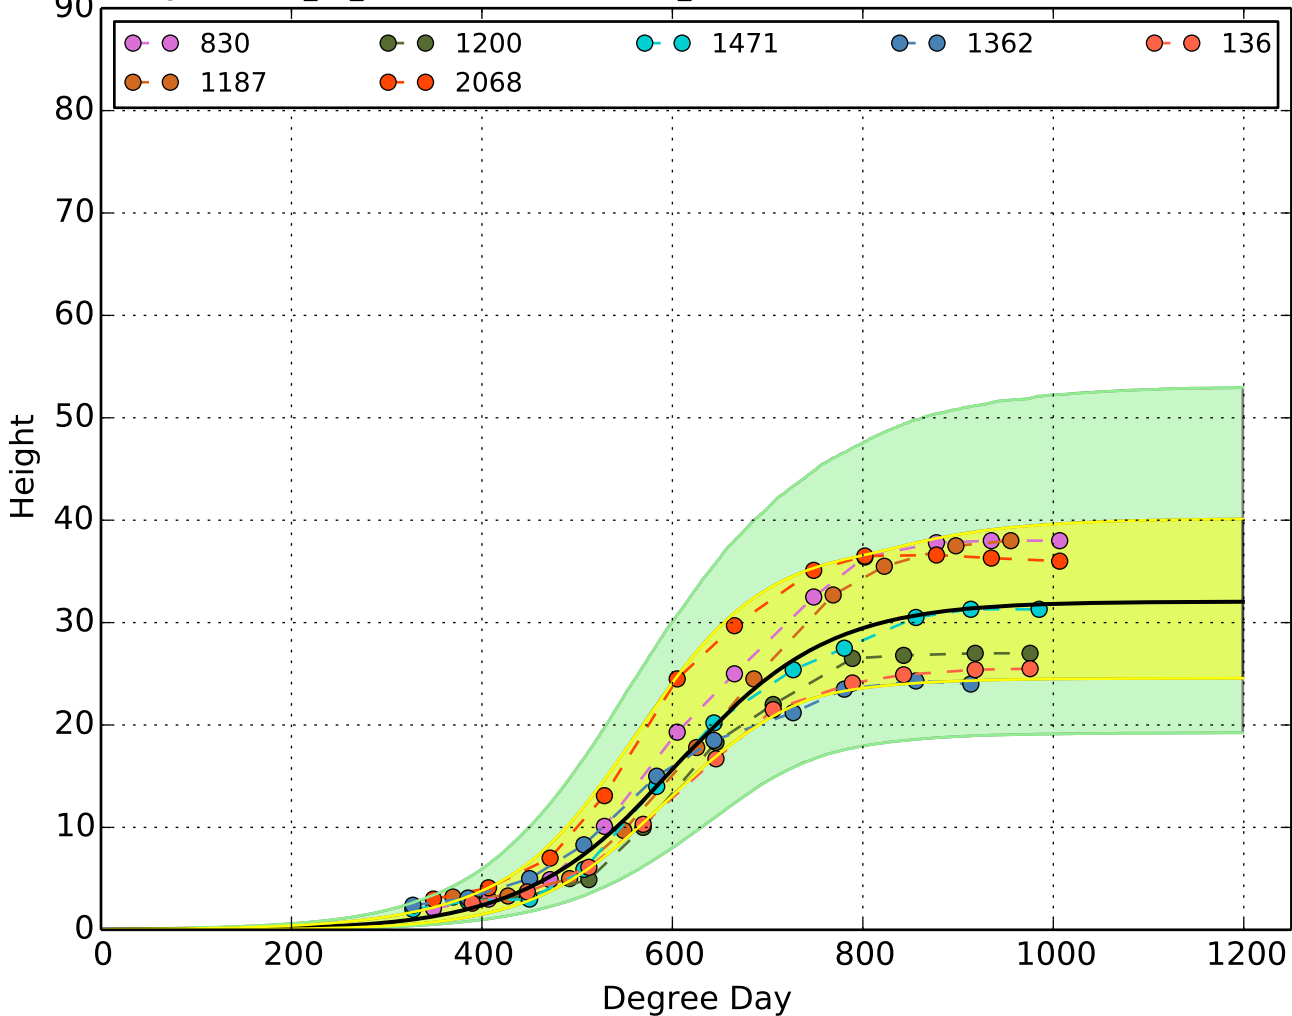

HeightModel3\_v1\_ResErrModel,Treat= CR\_2012,Line 248 (#Inv=7);95CI GrowthCurves

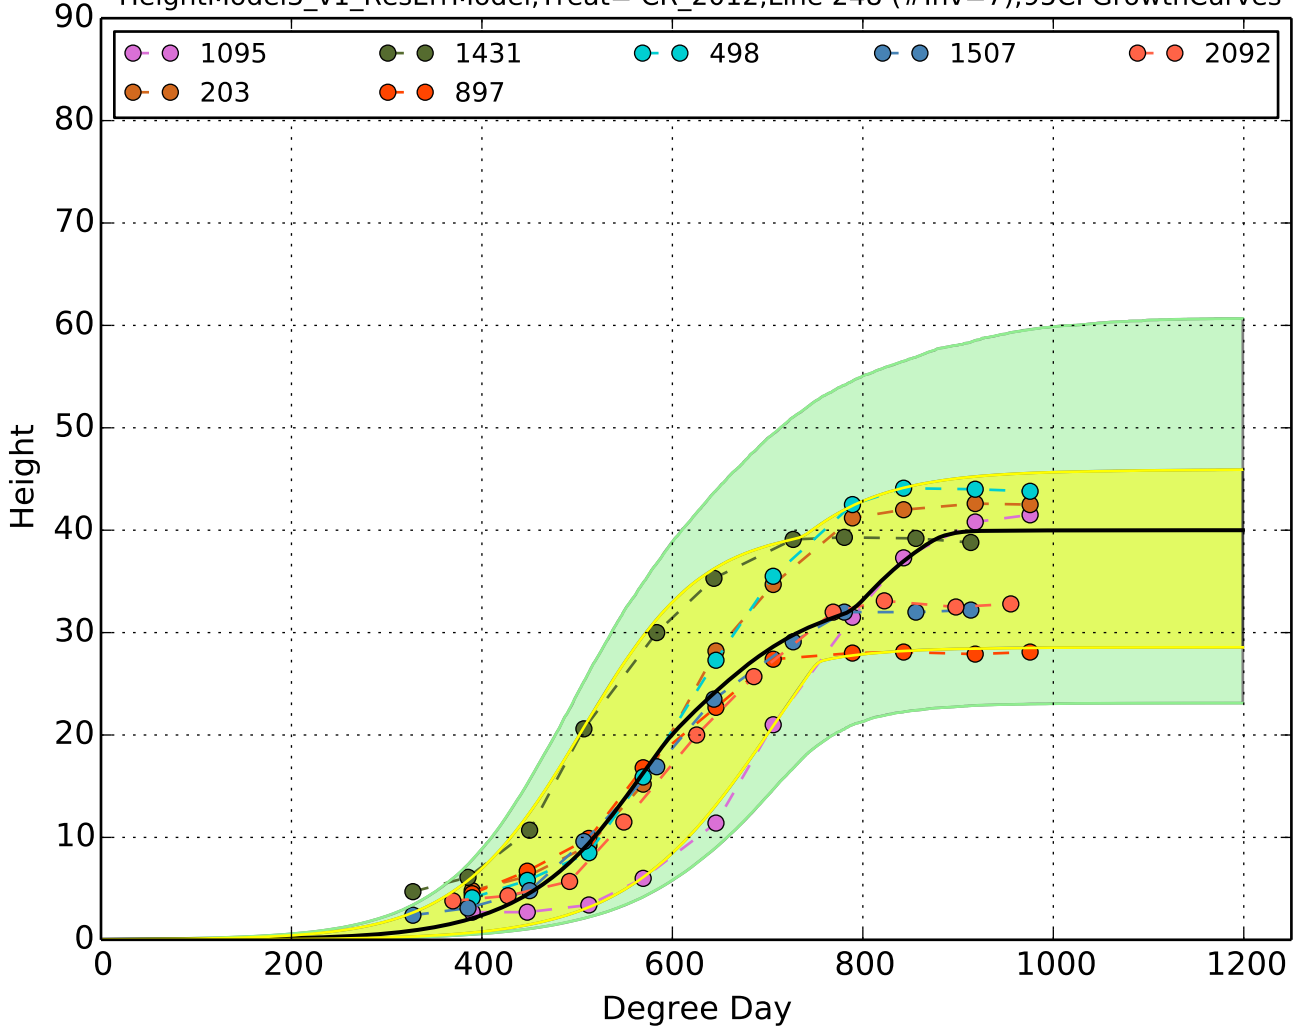

HeightModel3\_v1\_ResErrModel,Treat= CR\_2012,Line 250 (#Inv=8);95CI GrowthCurves

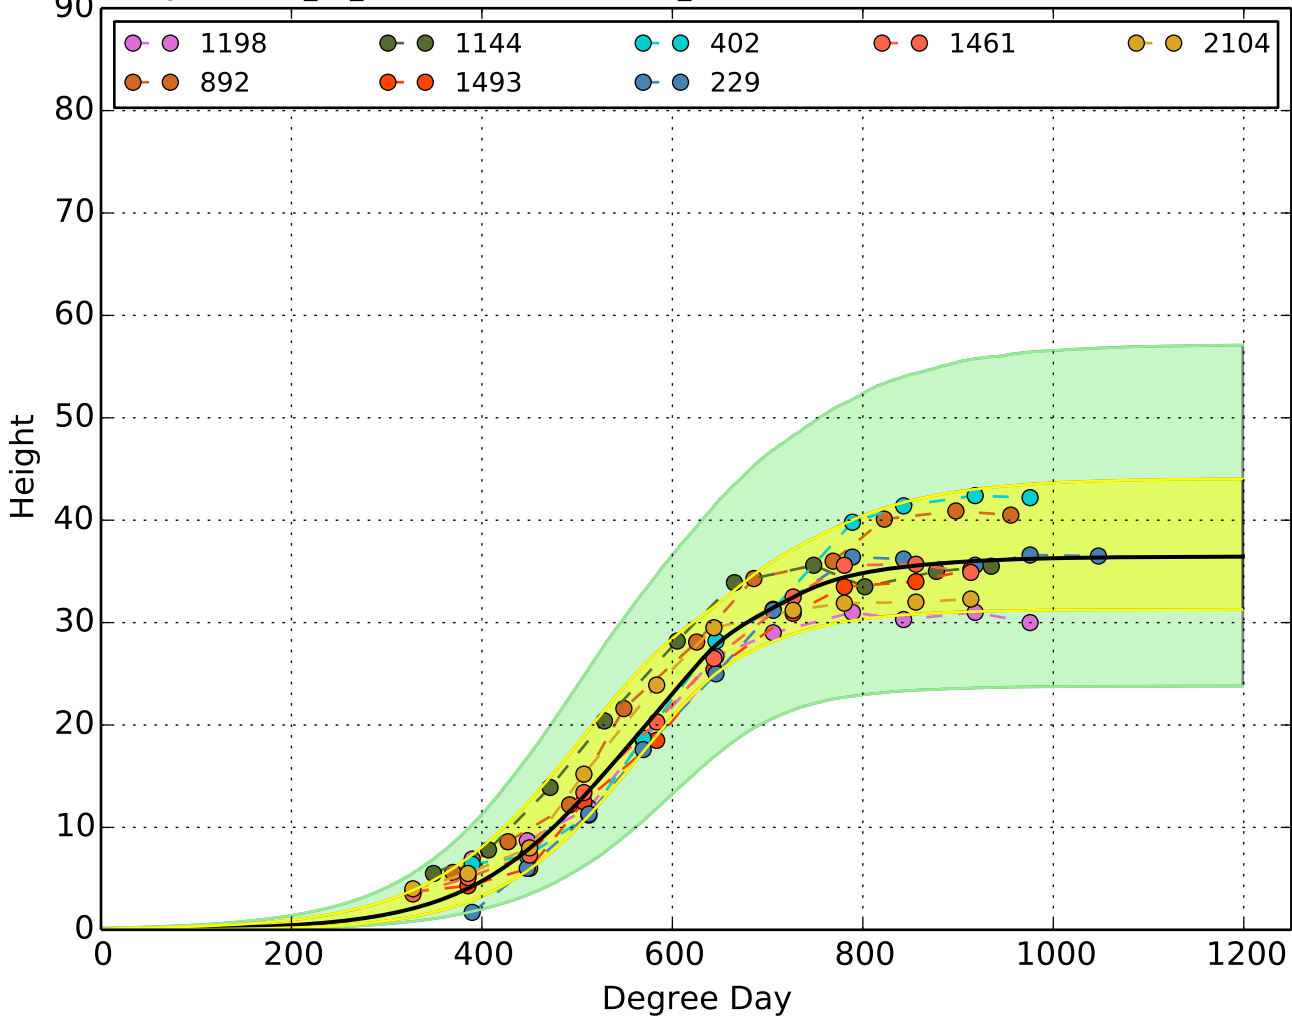

HeightModel3\_v1\_ResErrModel,Treat= CR\_2012,Line 251 (#Inv=8);95CI GrowthCurves

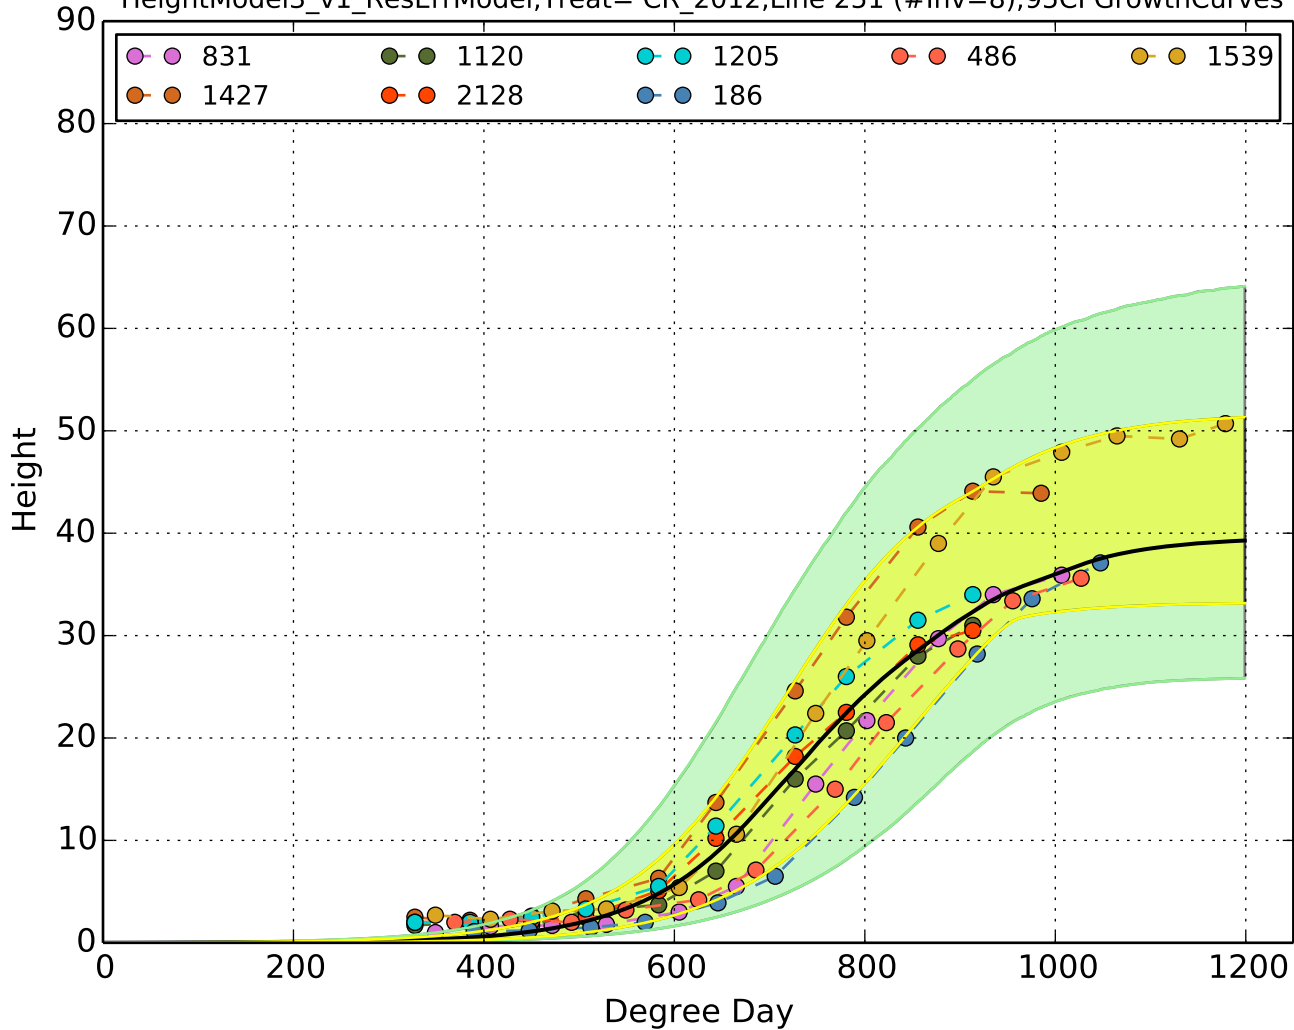

HeightModel3\_v1\_ResErrModel,Treat= CR\_2012,Line 253 (#Inv=7);95CI GrowthCurves

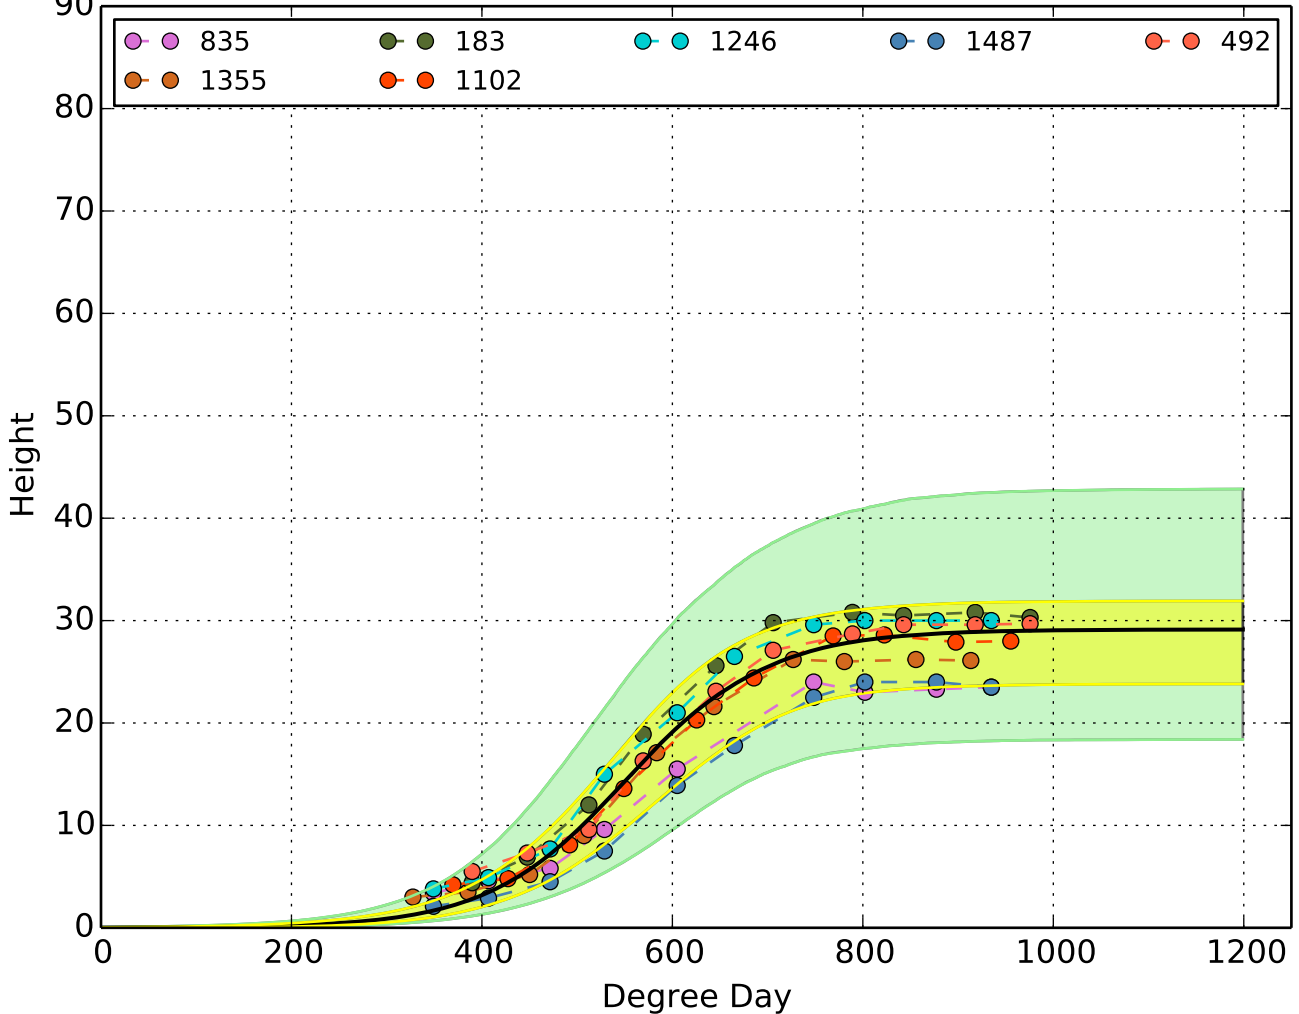

HeightModel3\_v1\_ResErrModel,Treat= CR\_2012,Line 255 (#Inv=8);95CI GrowthCurves

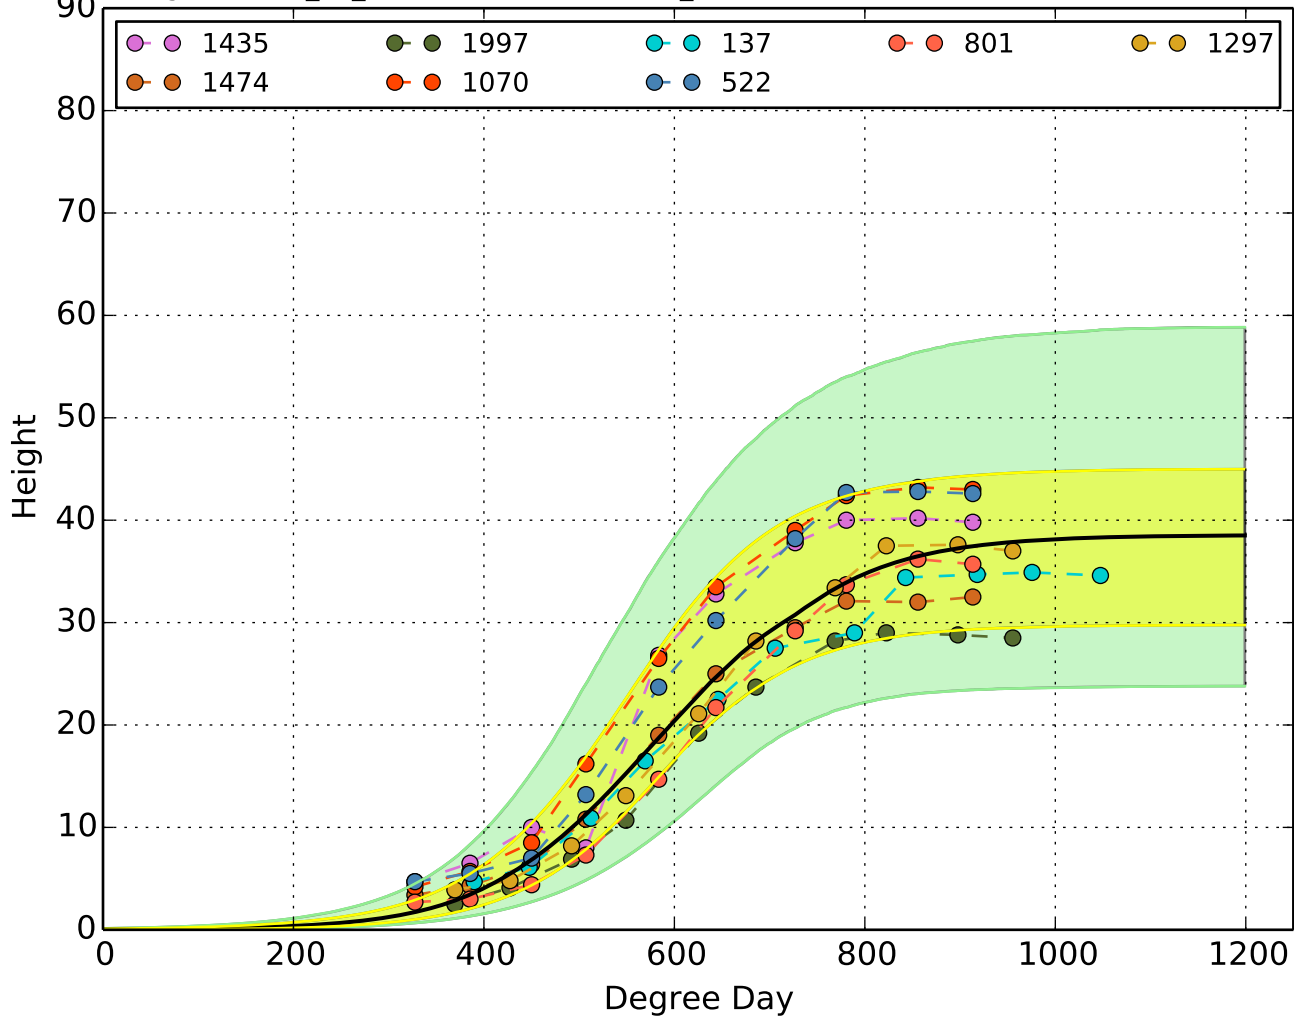

HeightModel3\_v1\_ResErrModel,Treat= CR\_2012,Line 256 (#Inv=8);95CI GrowthCurves

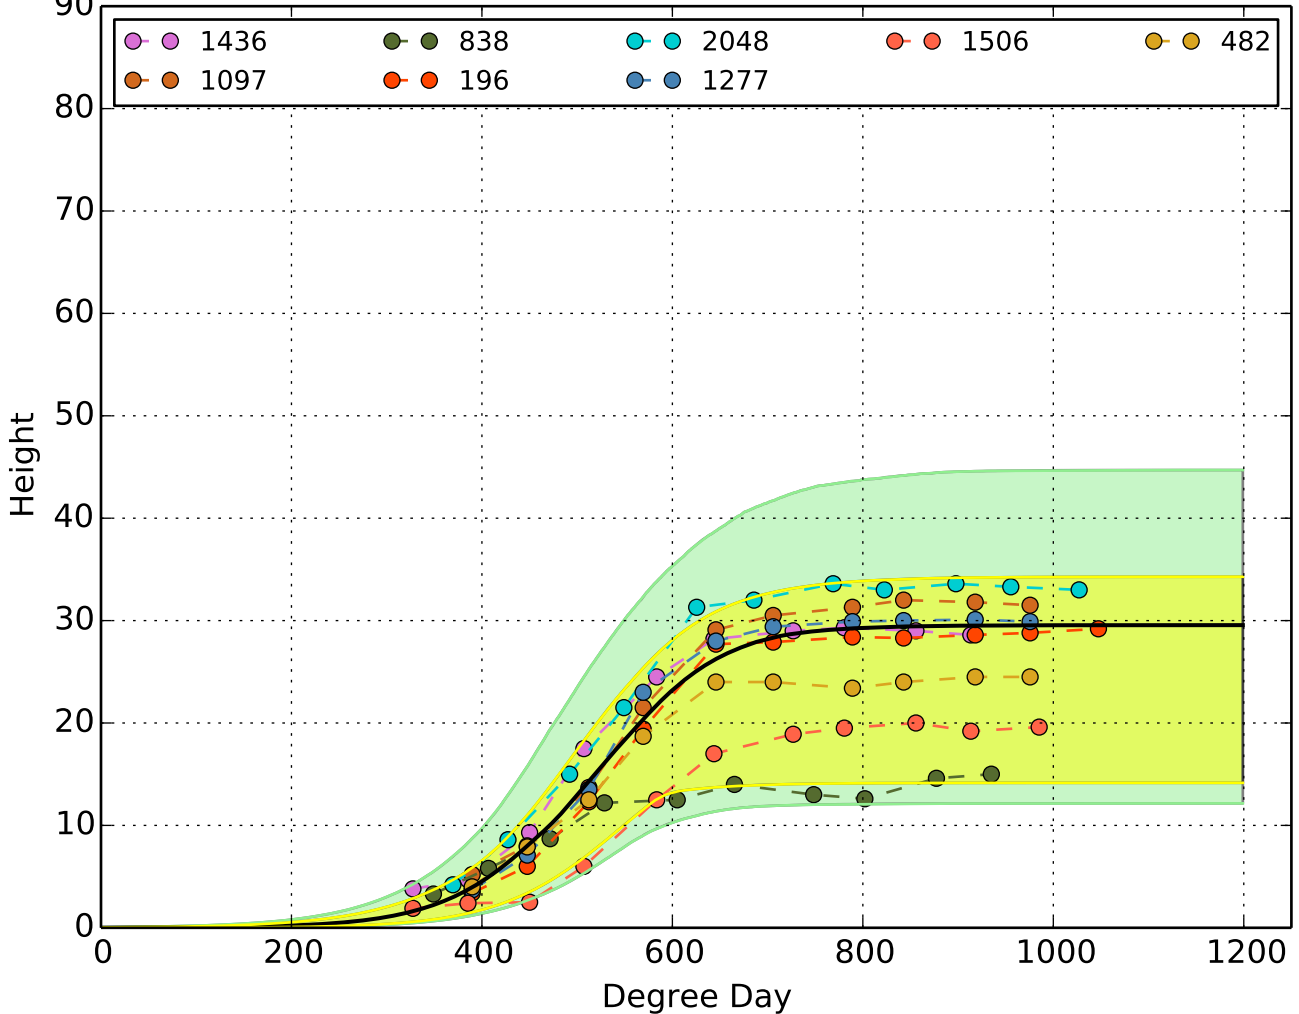



HeightModel3\_v1\_ResErrModel,Treat= CR\_2012,Line 259 (#Inv=8);95CI GrowthCurves

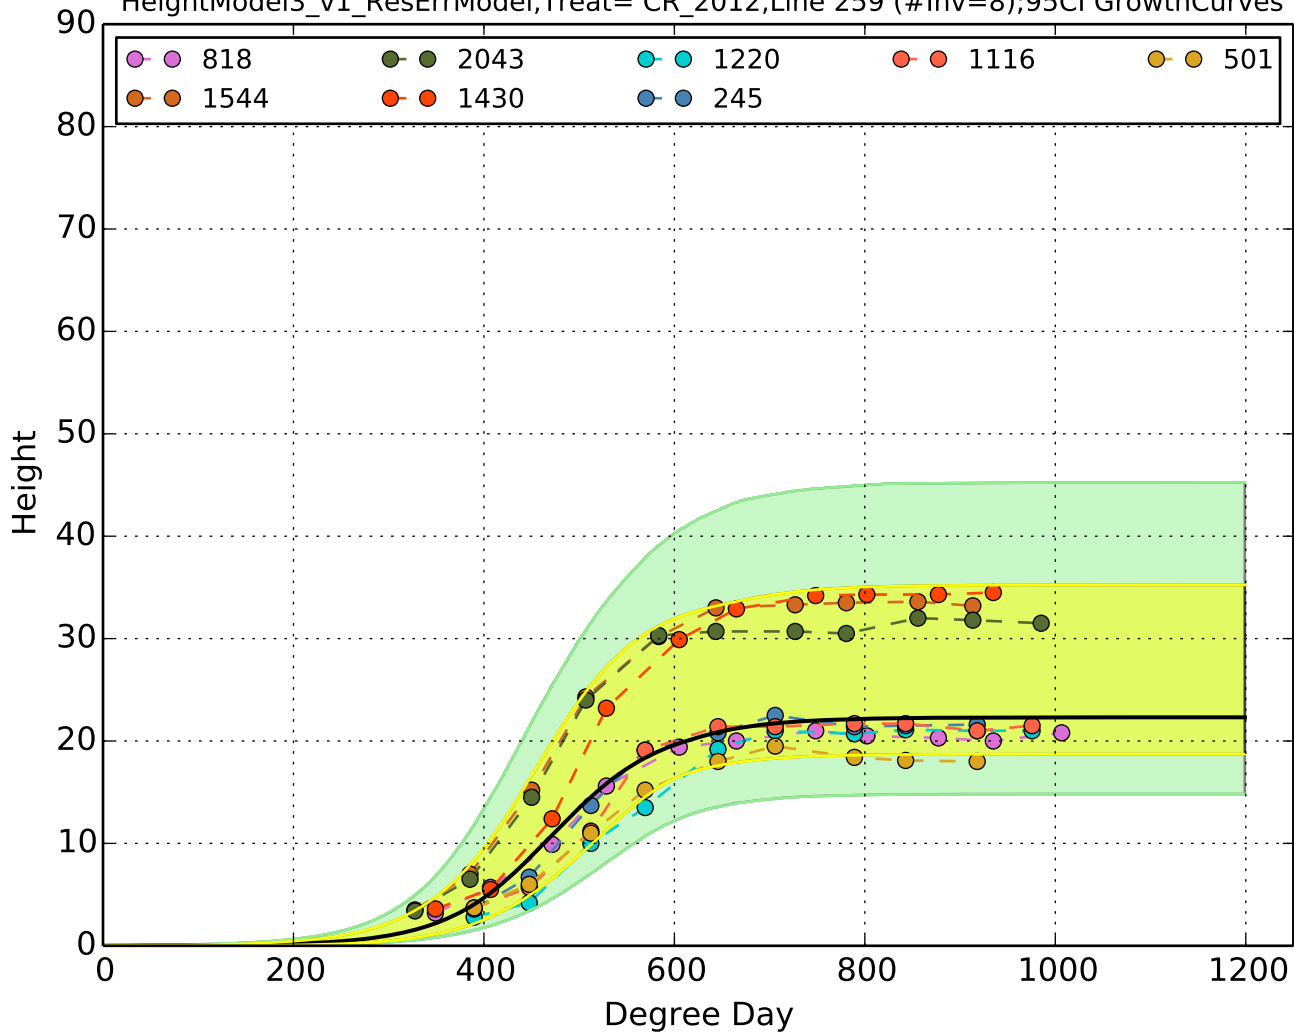

HeightModel3\_v1\_ResErrModel,Treat= CR\_2012,Line 264 (#Inv=7);95CI GrowthCurves

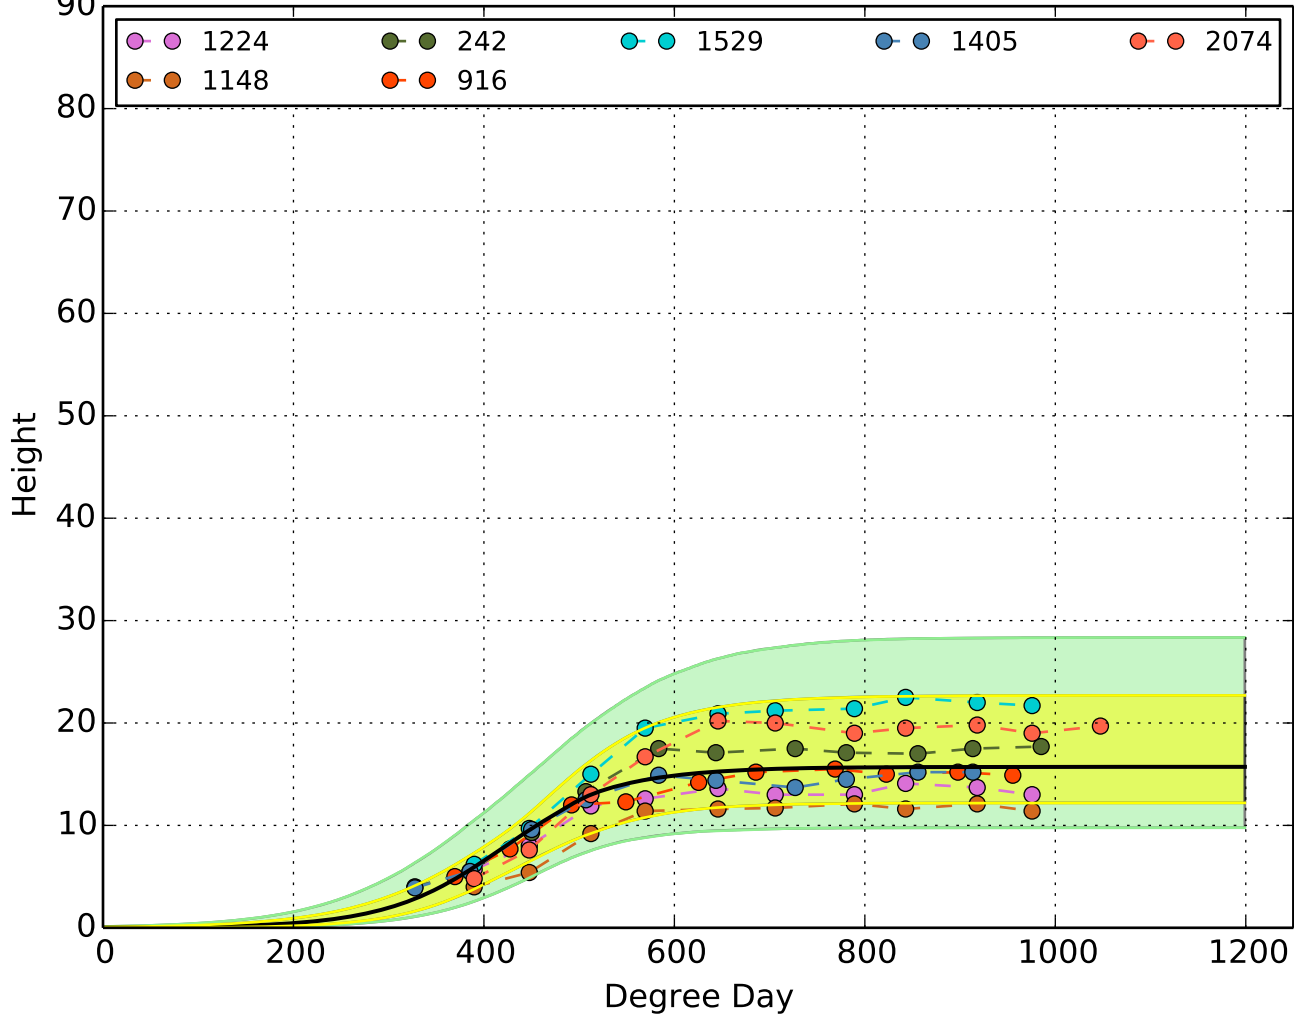

HeightModel3\_v1\_ResErrModel,Treat= CR\_2012,Line 265 (#Inv=5);95CI GrowthCurves

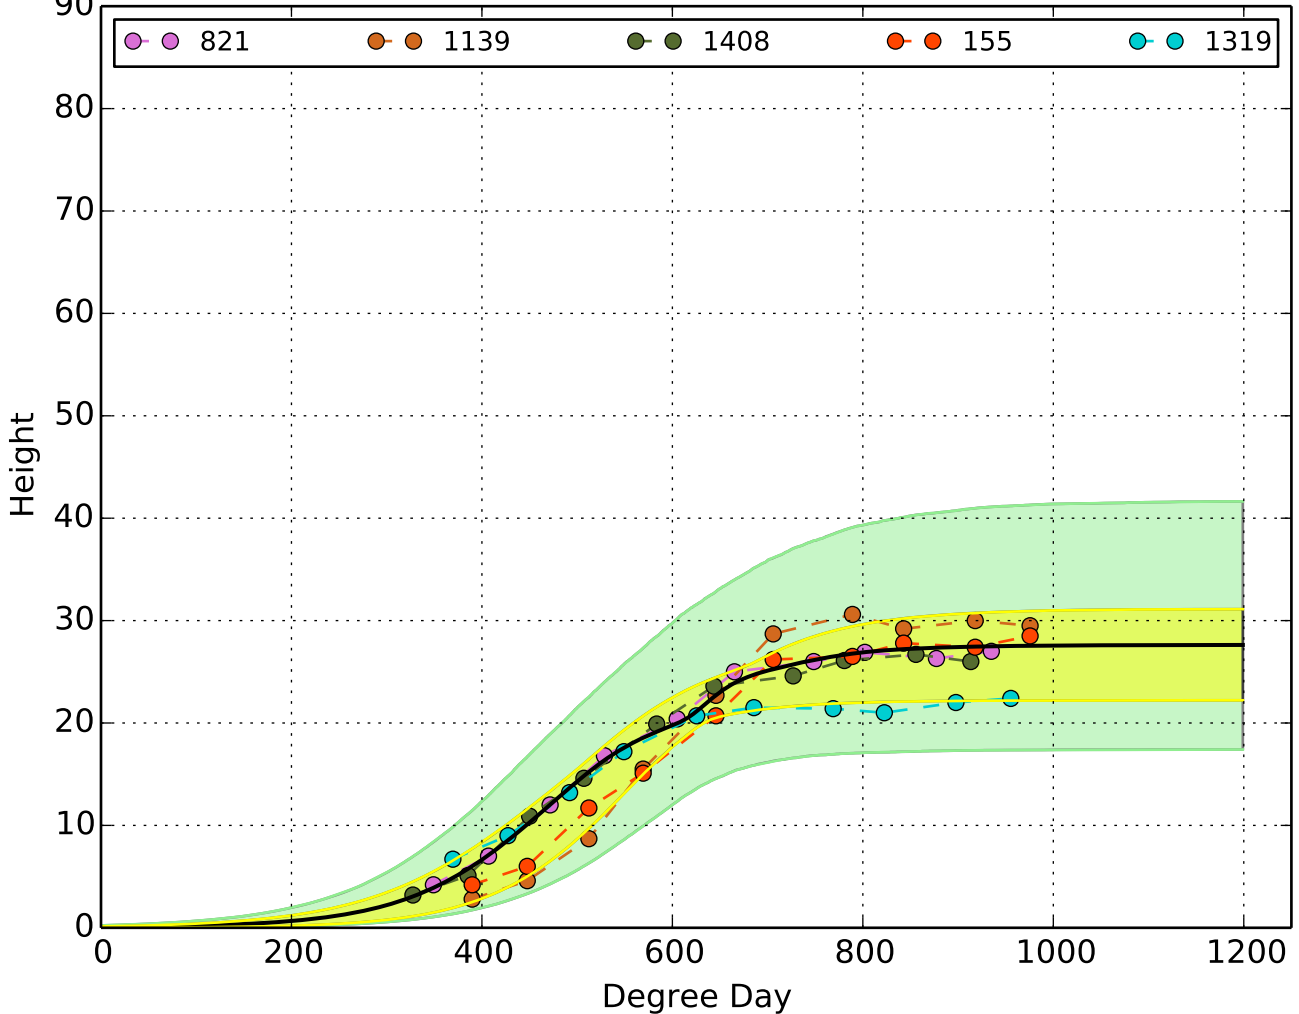

HeightModel3\_v1\_ResErrModel,Treat= CR\_2012,Line 267 (#Inv=6);95CI GrowthCurves

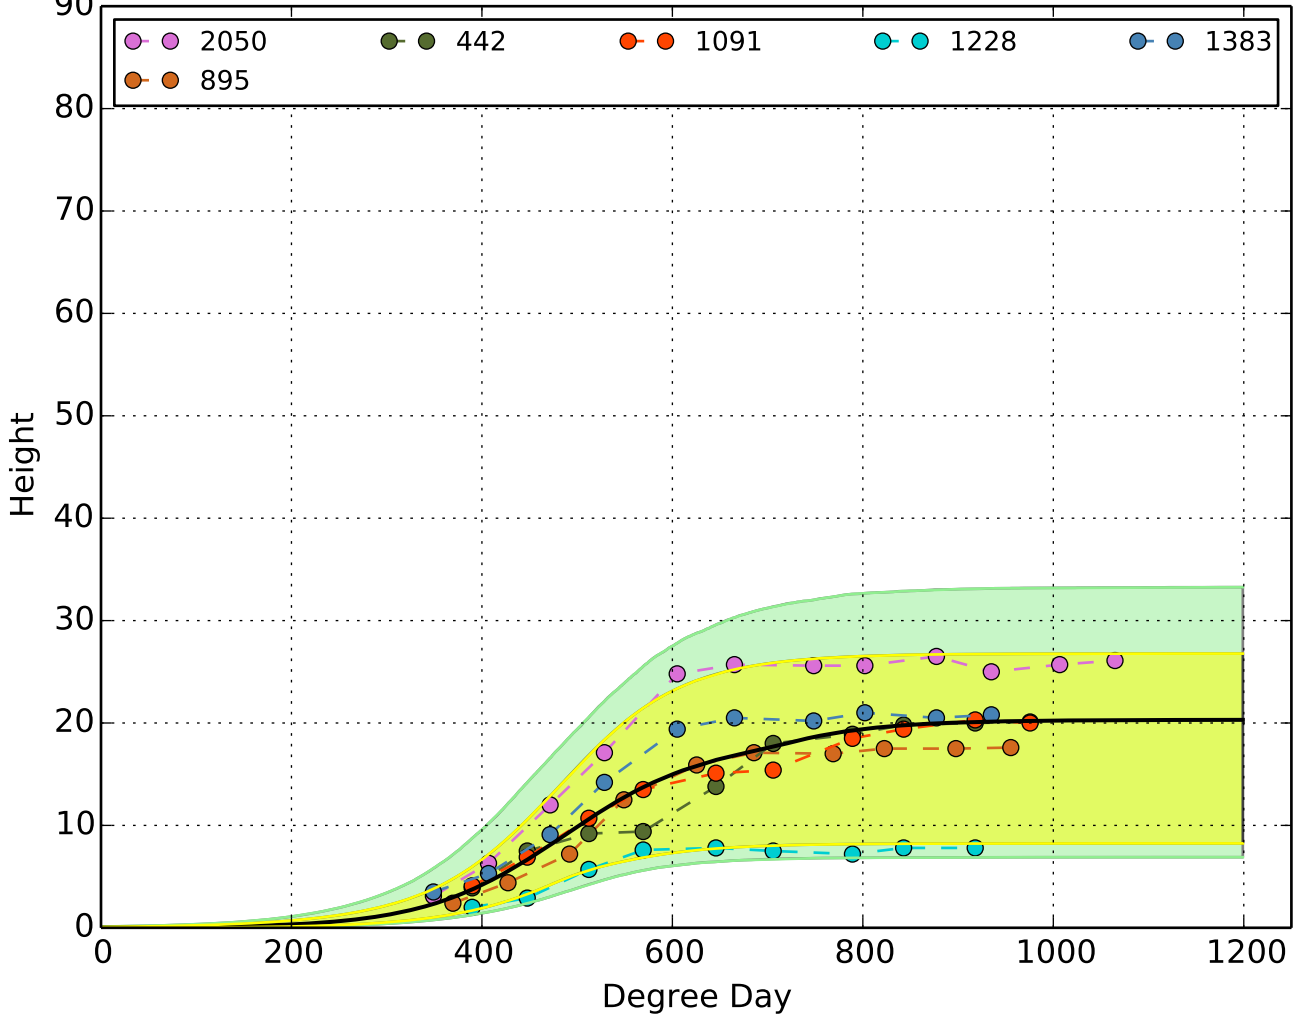

HeightModel3\_v1\_ResErrModel,Treat= CR\_2012,Line 268 (#Inv=5);95CI GrowthCurves

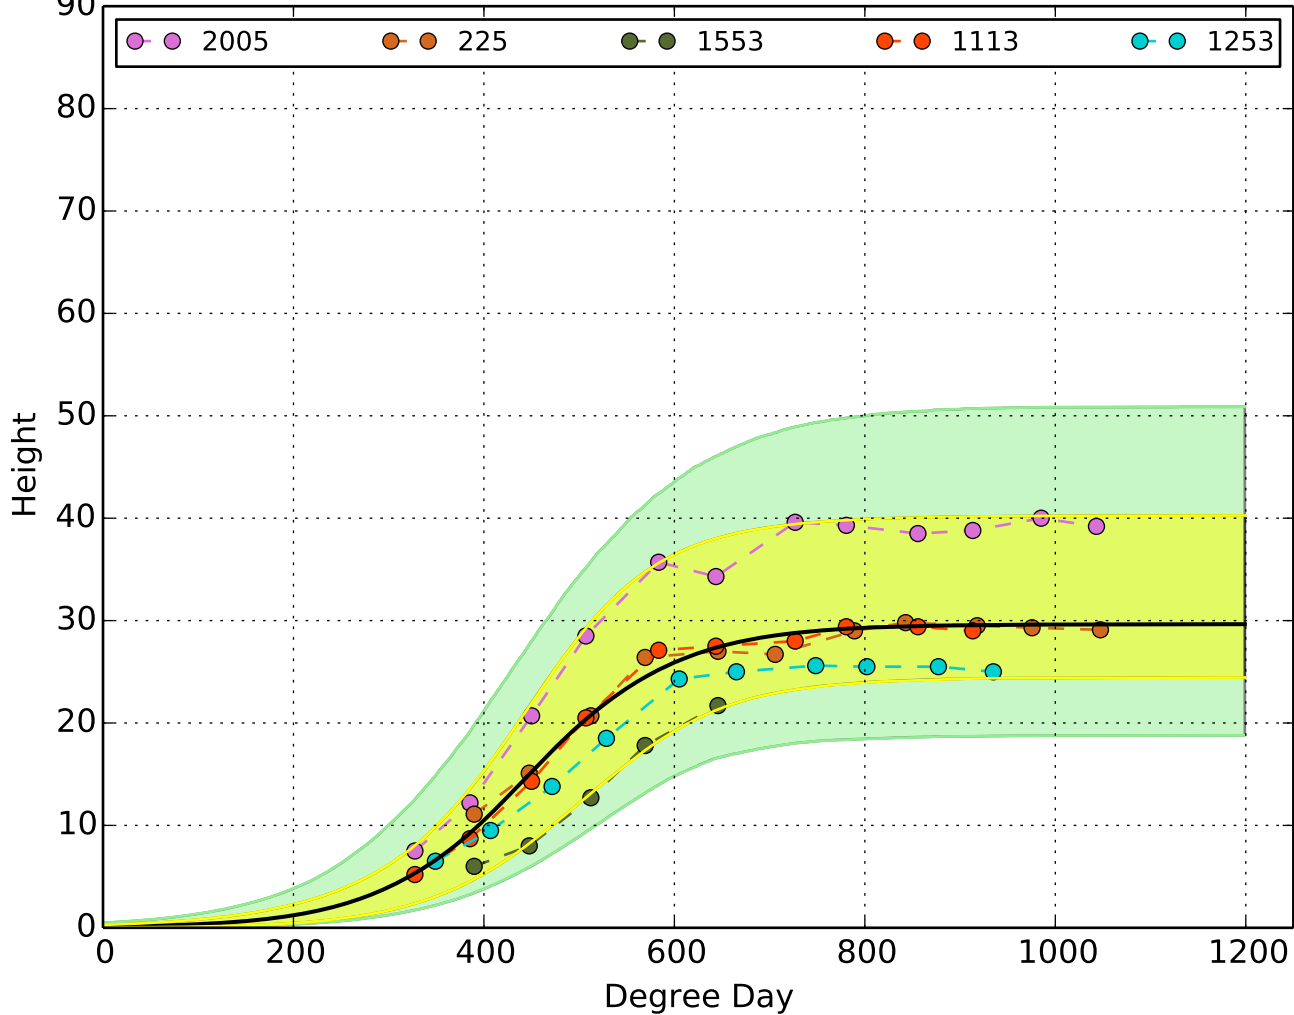

HeightModel3\_v1\_ResErrModel,Treat= CR\_2012,Line 270 (#Inv=5);95CI GrowthCurves

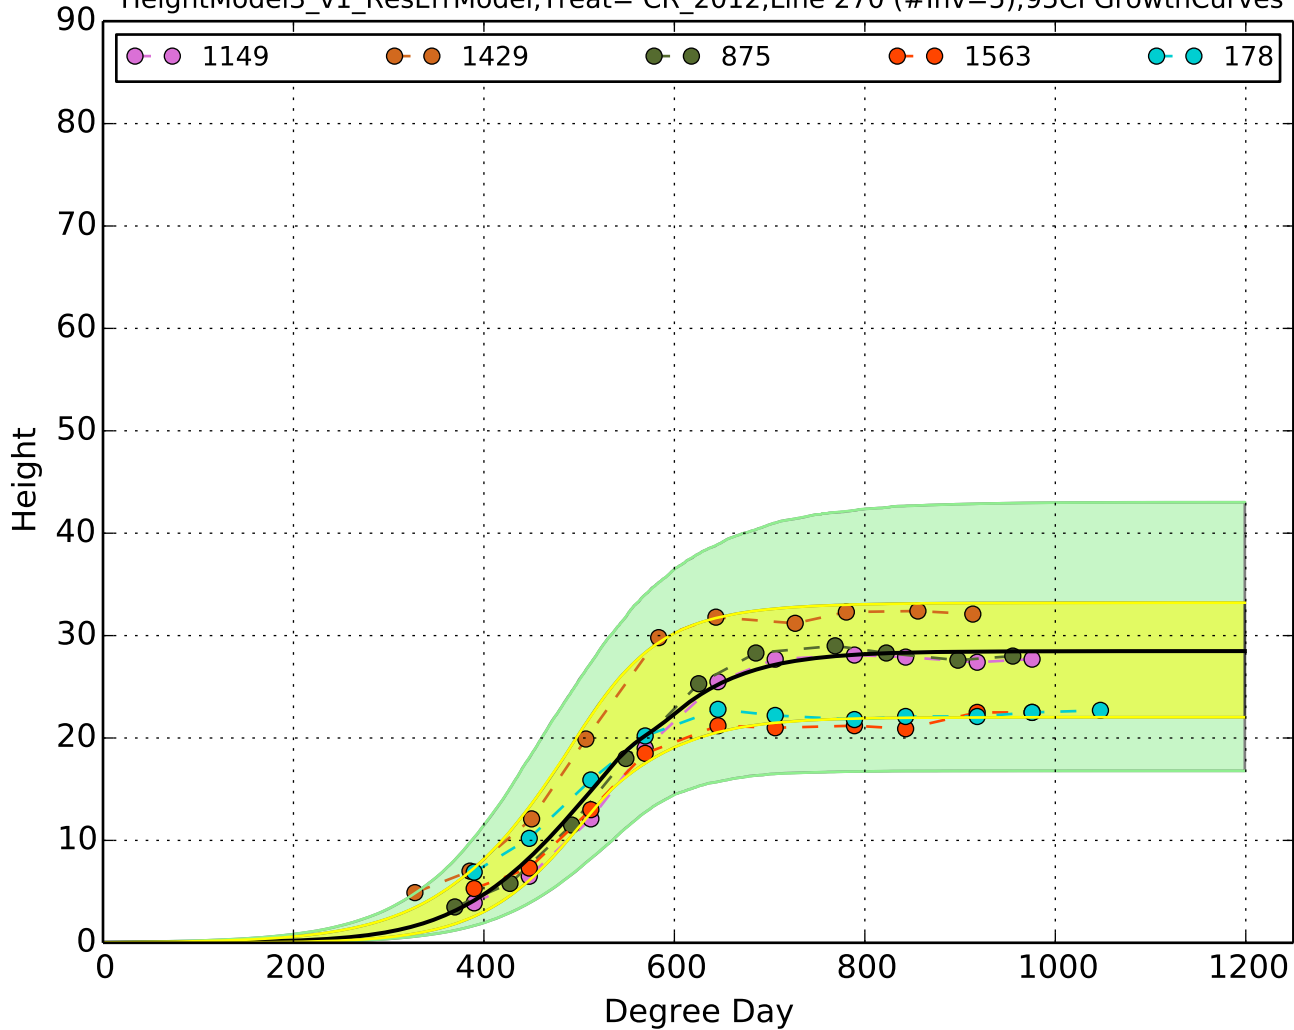

HeightModel3\_v1\_ResErrModel,Treat= CR\_2012,Line 277 (#Inv=8);95CI GrowthCurves

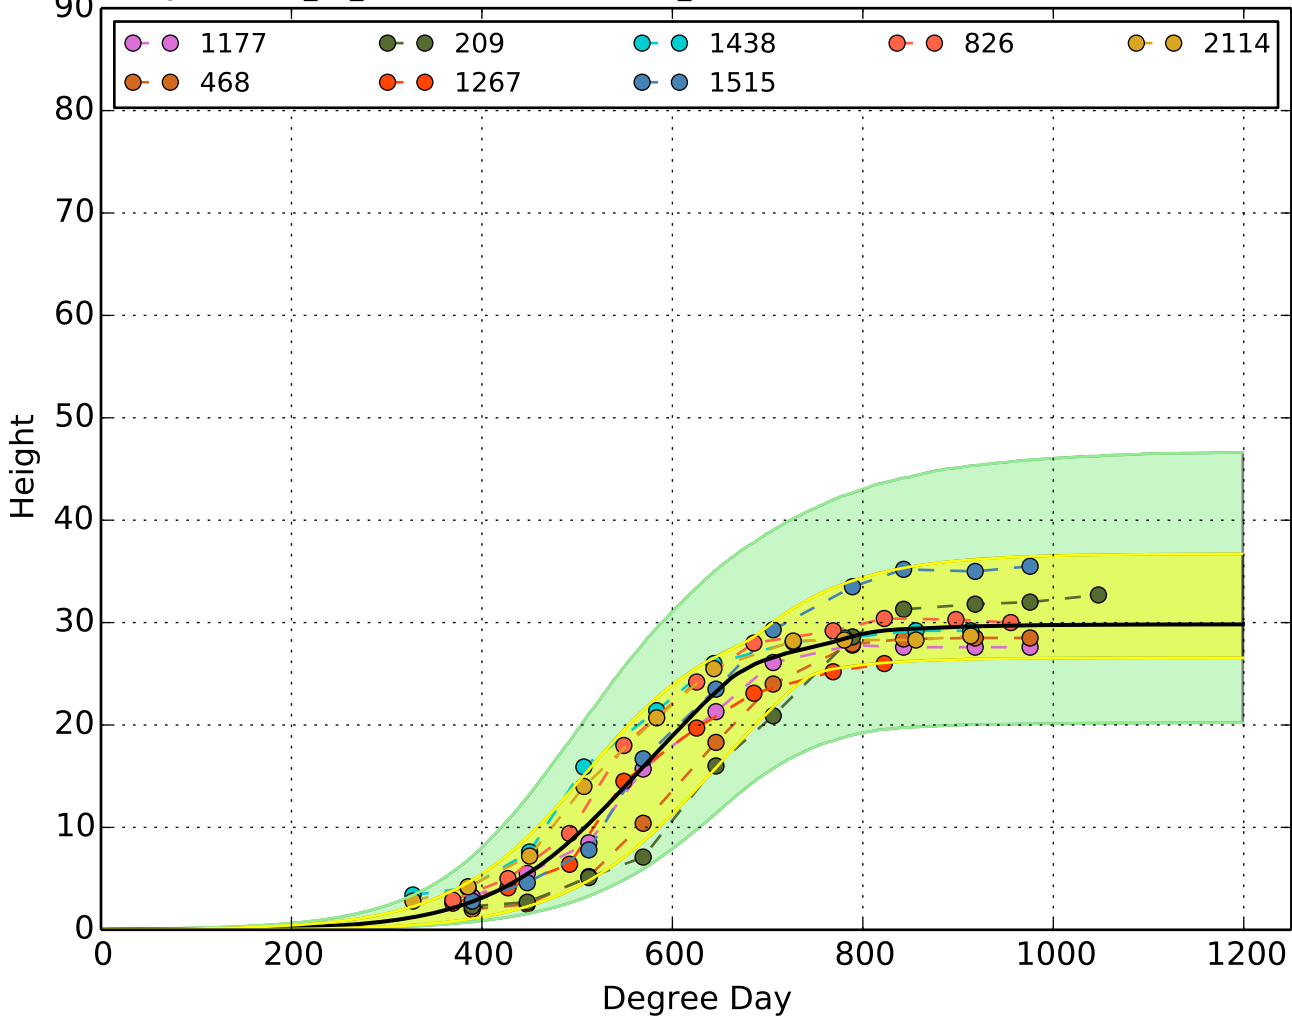

HeightModel3\_v1\_ResErrModel,Treat= CR\_2012,Line 281 (#Inv=8);95CI GrowthCurves

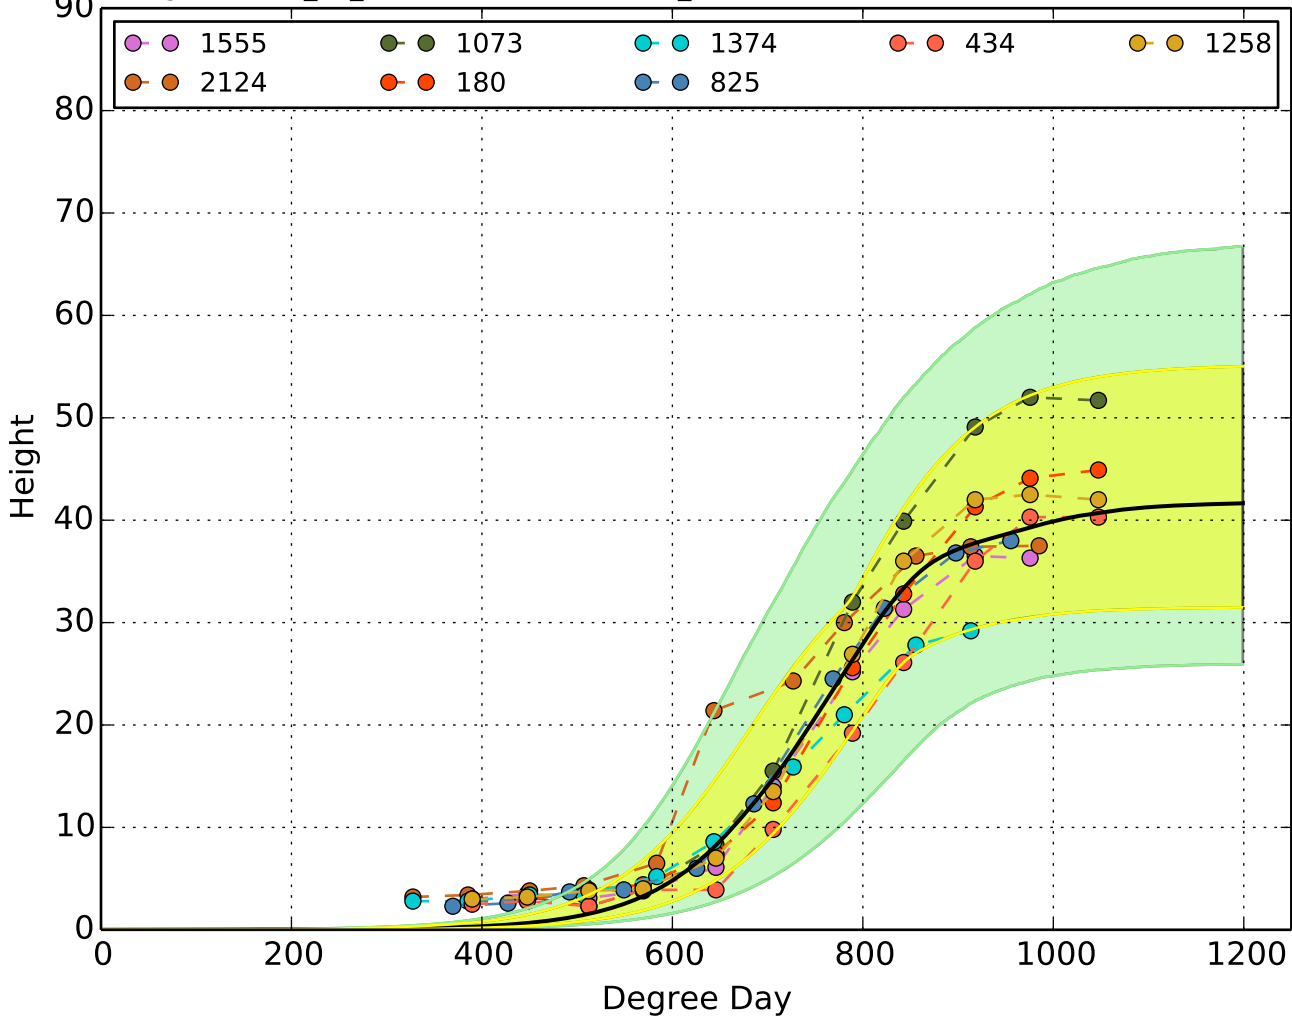



HeightModel3\_v1\_ResErrModel,Treat= CR\_2012,Line 282 (#Inv=7);95CI GrowthCurves

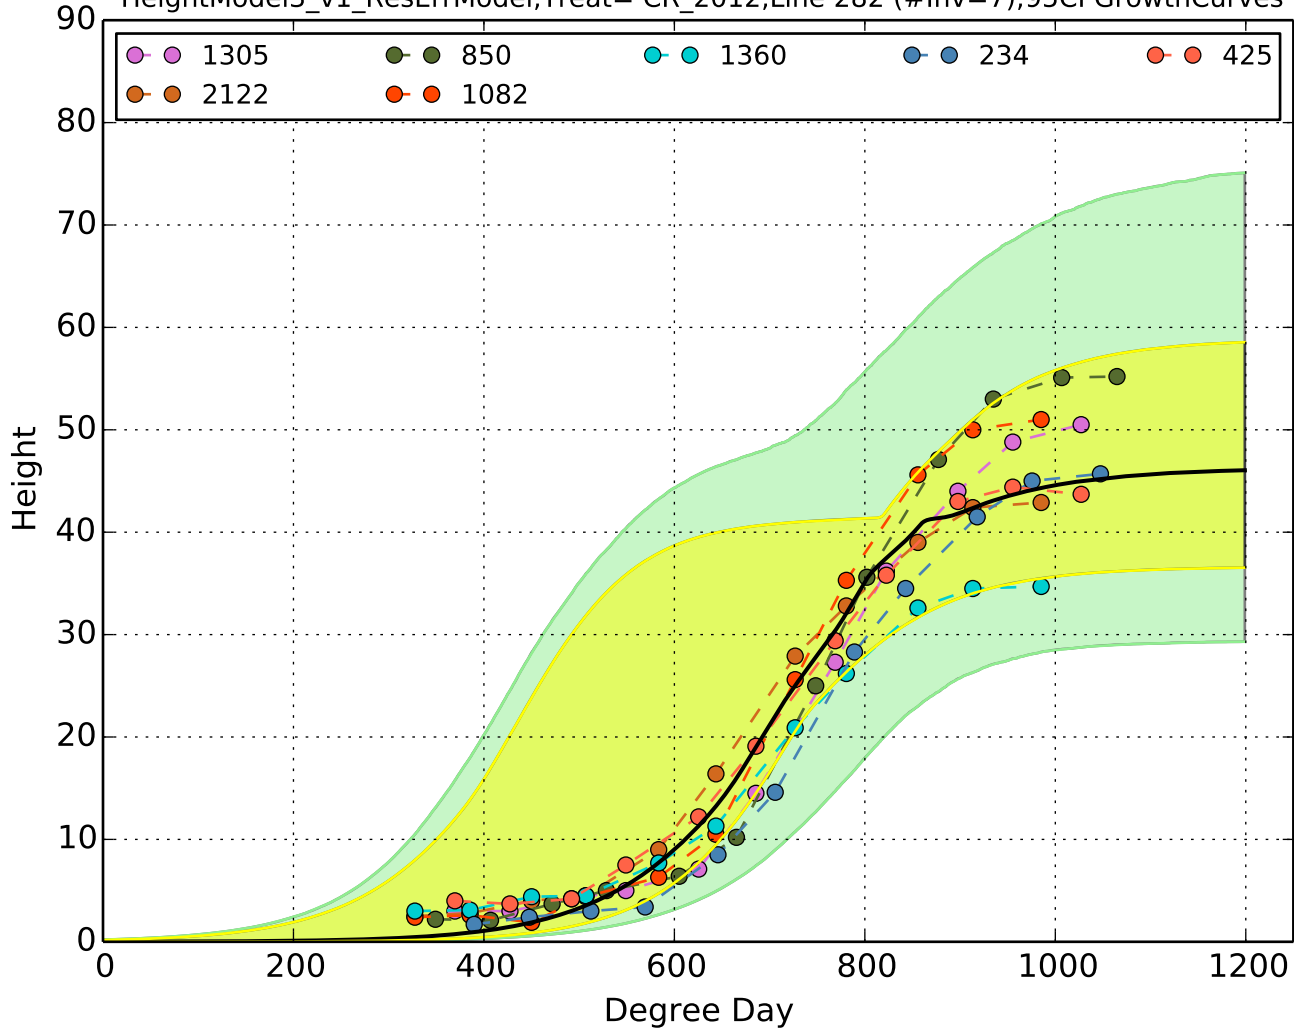

HeightModel3\_v1\_ResErrModel,Treat= CR\_2012,Line 284 (#Inv=8);95CI GrowthCurves

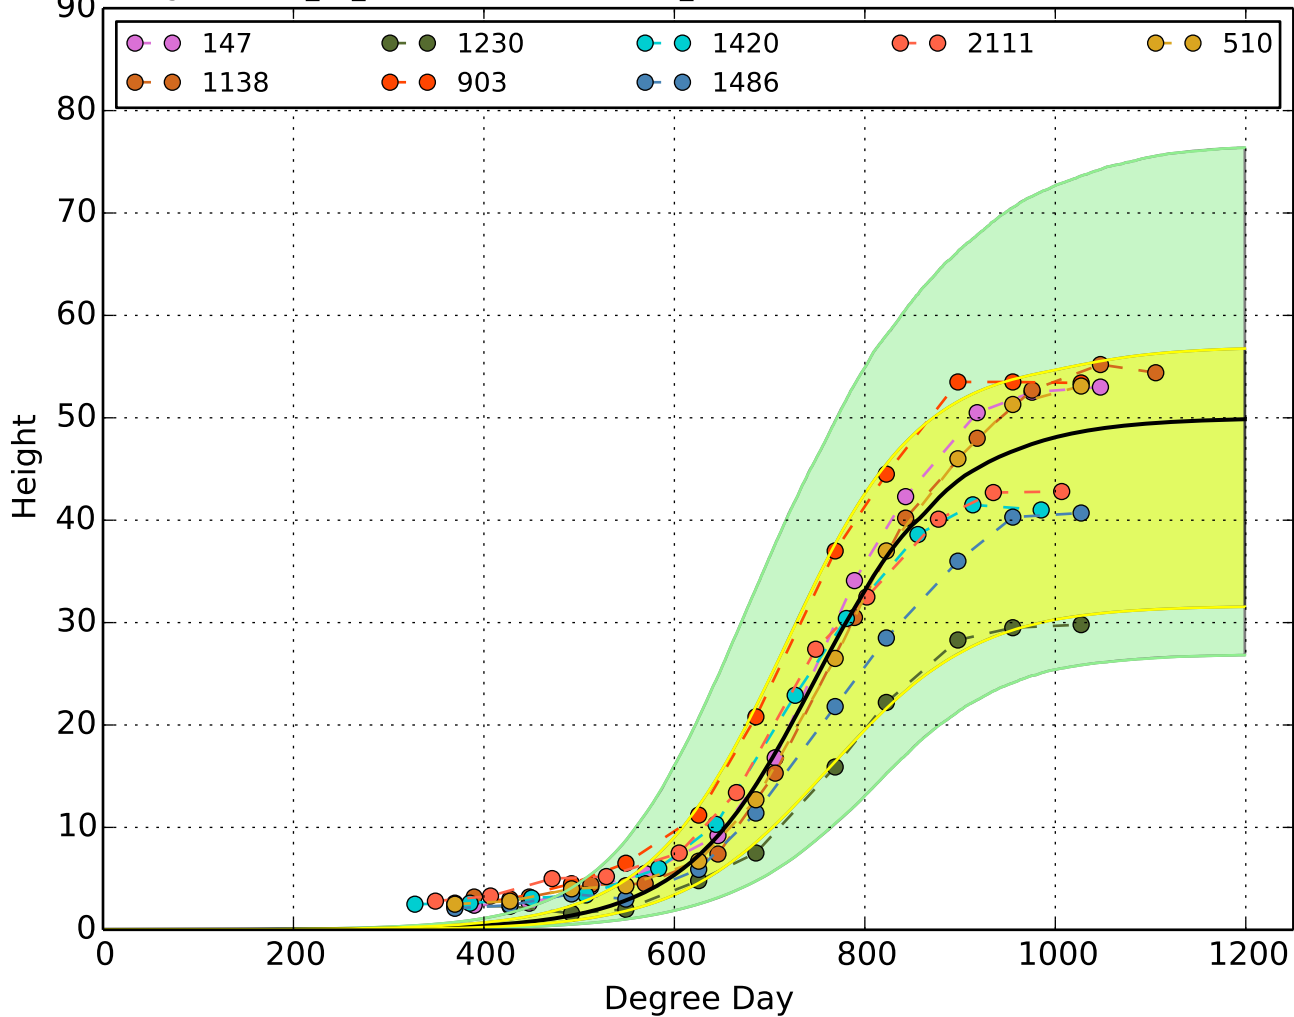

HeightModel3\_v1\_ResErrModel,Treat= CR\_2012,Line 285 (#Inv=7);95CI GrowthCurves

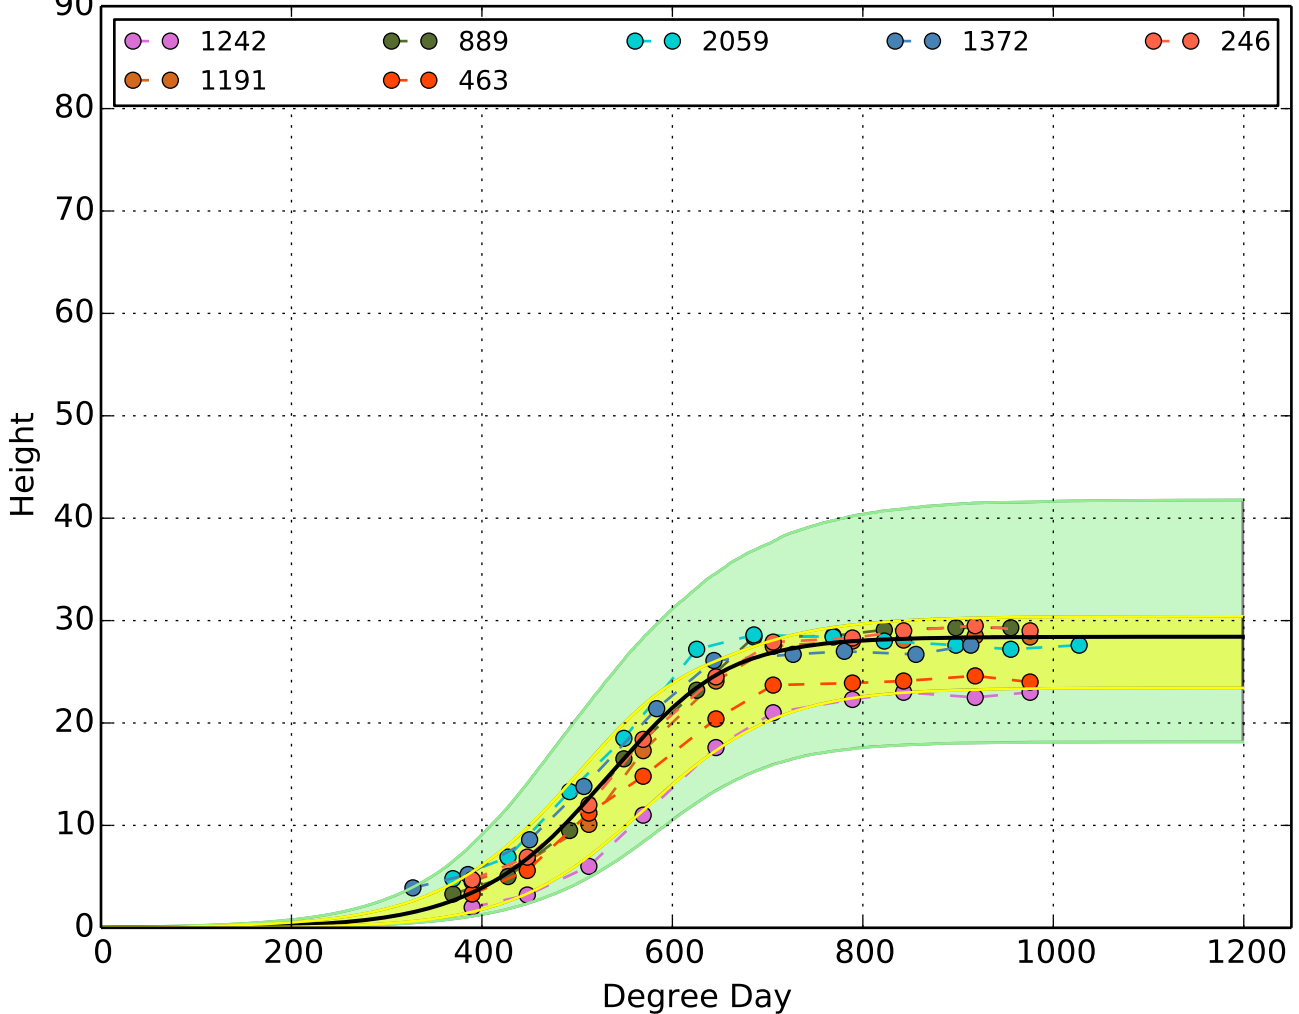

HeightModel3\_v1\_ResErrModel,Treat= CR\_2012,Line 288 (#Inv=6);95CI GrowthCurves

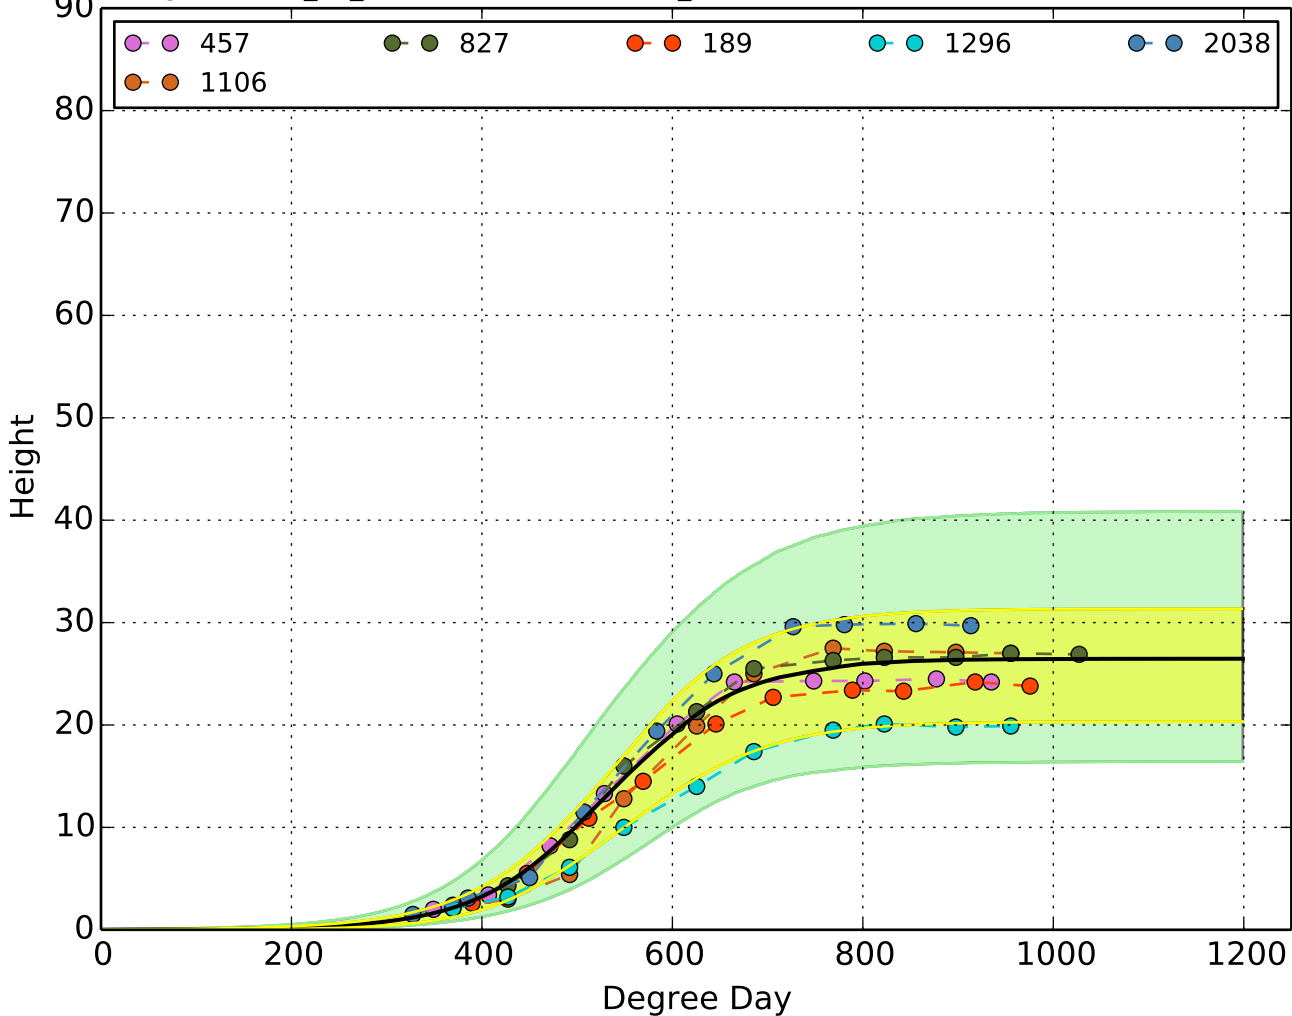

HeightModel3\_v1\_ResErrModel,Treat= CR\_2012,Line 289 (#Inv=6);95CI GrowthCurves

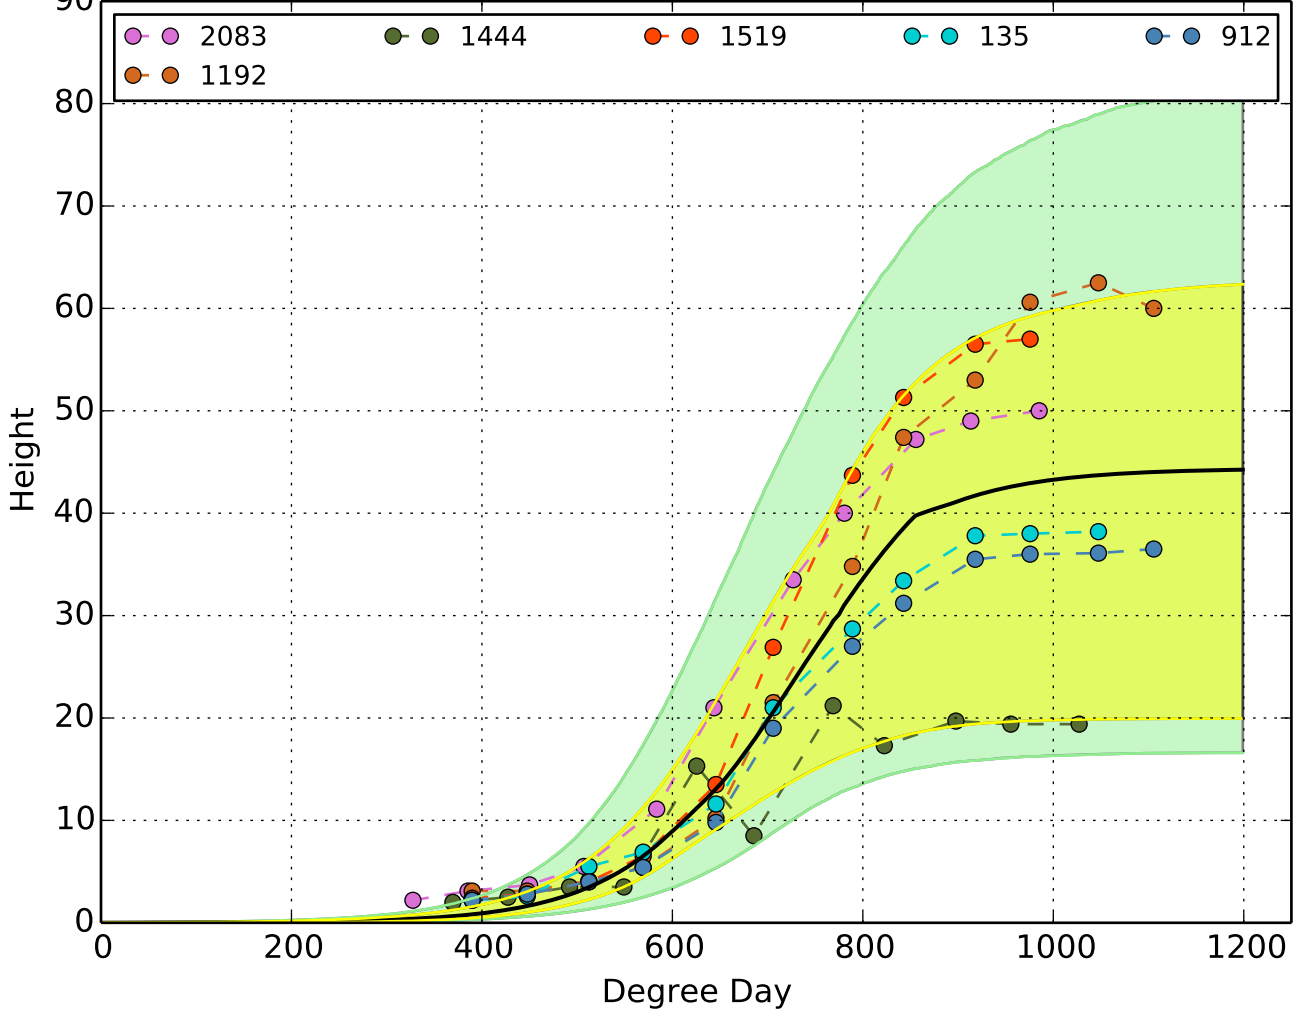

HeightModel3\_v1\_ResErrModel,Treat= CR\_2012,Line 290 (#Inv=6);95CI GrowthCurves

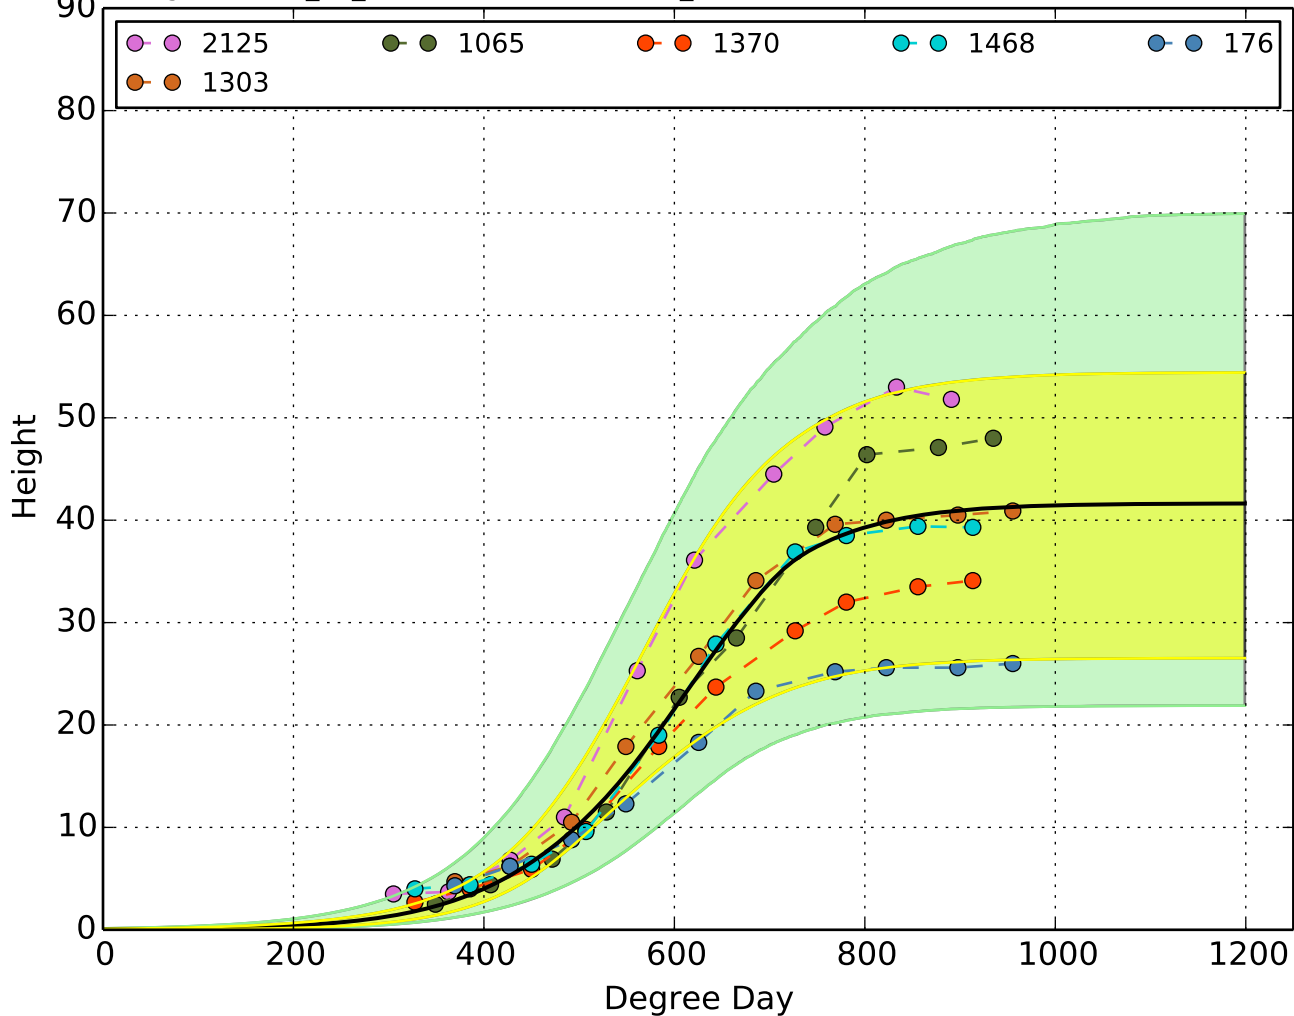

HeightModel3\_v1\_ResErrModel,Treat= CR\_2012,Line 300 (#Inv=8);95CI GrowthCurves

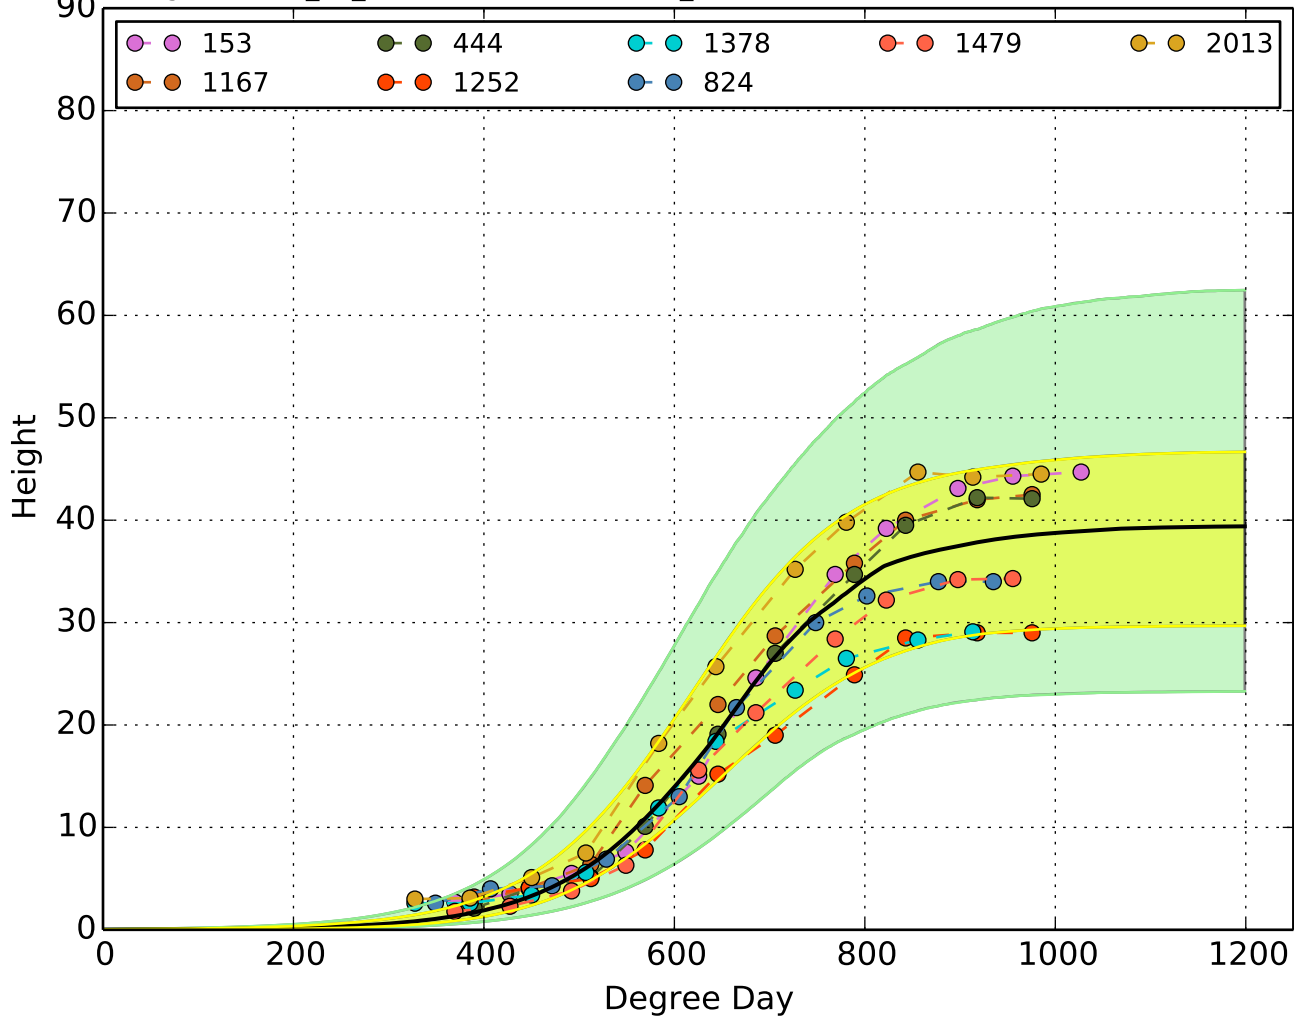

HeightModel3\_v1\_ResErrModel,Treat= CR\_2012,Line 301 (#Inv=7);95CI GrowthCurves

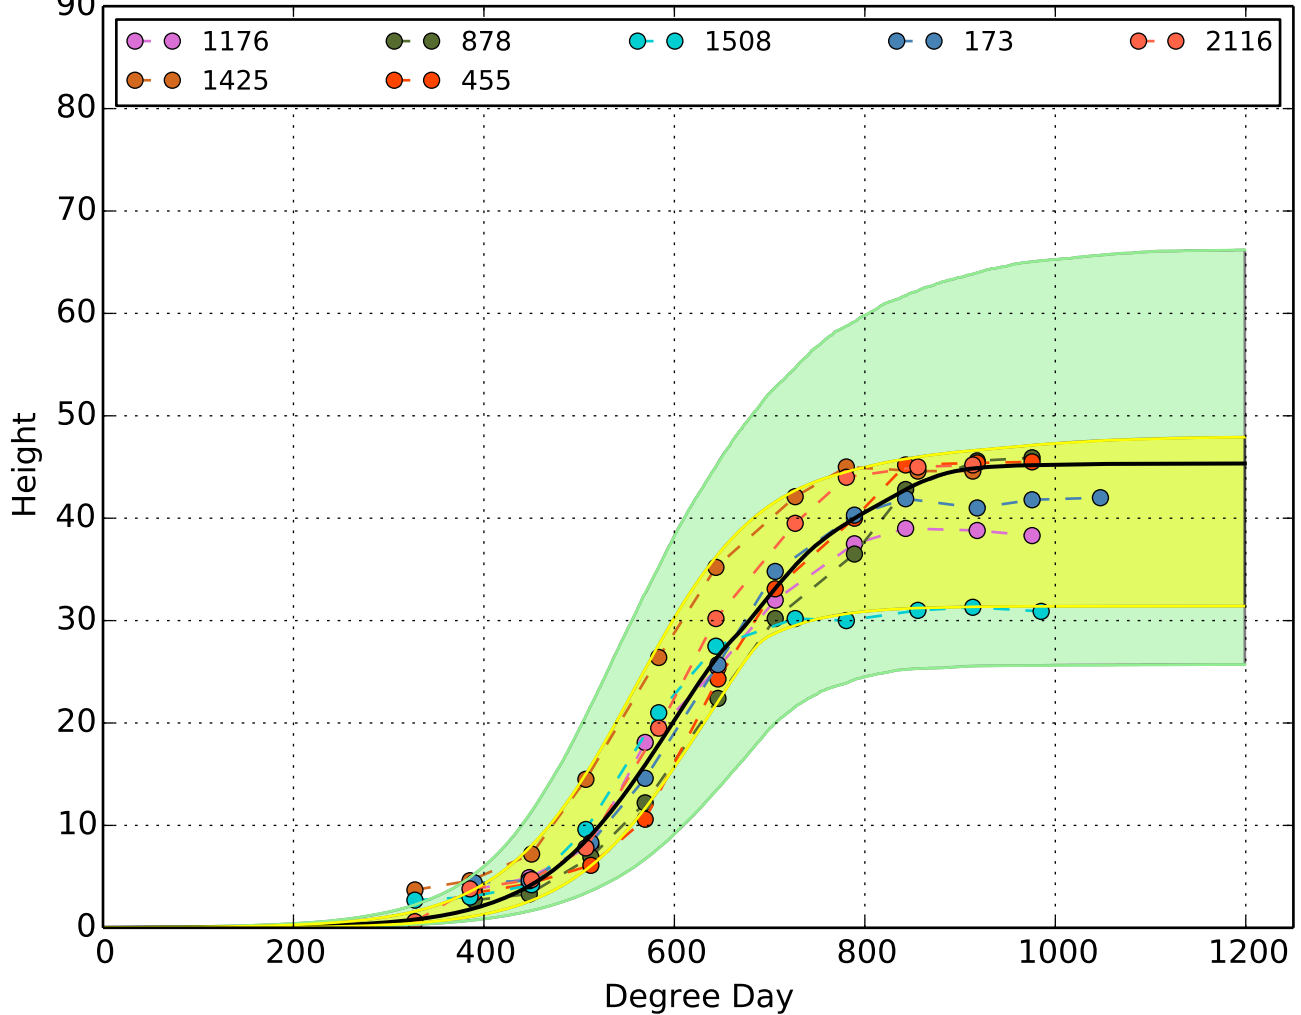



HeightModel3\_v1\_ResErrModel,Treat= CR\_2012,Line 303 (#Inv=7);95CI GrowthCurves

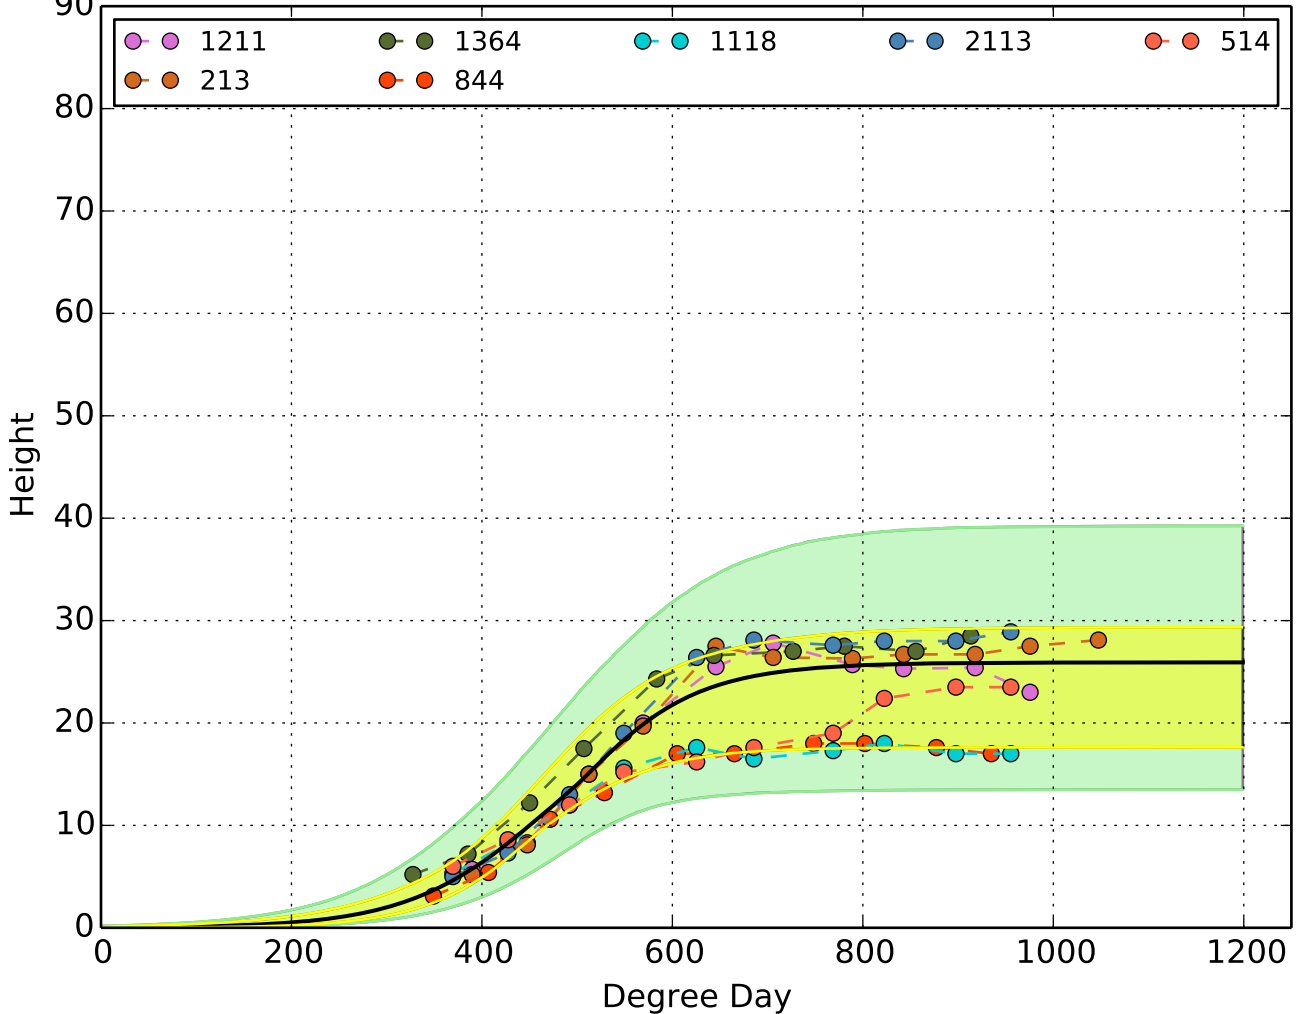

HeightModel3\_v1\_ResErrModel,Treat= CR\_2012,Line 308 (#Inv=6);95CI GrowthCurves

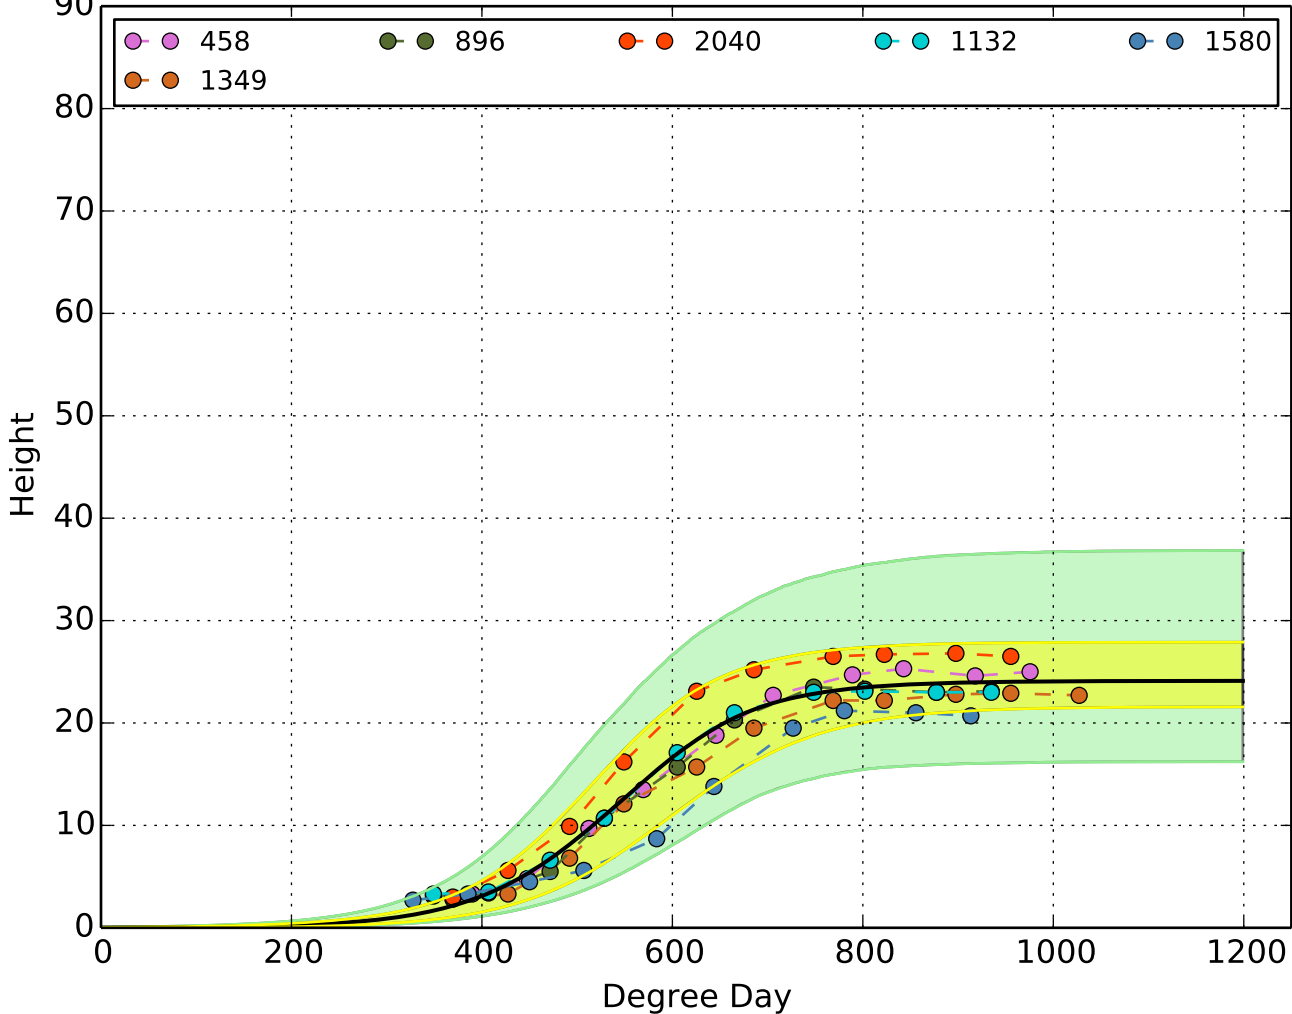

HeightModel3\_v1\_ResErrModel,Treat= CR\_2012,Line 311 (#Inv=5);95CI GrowthCurves

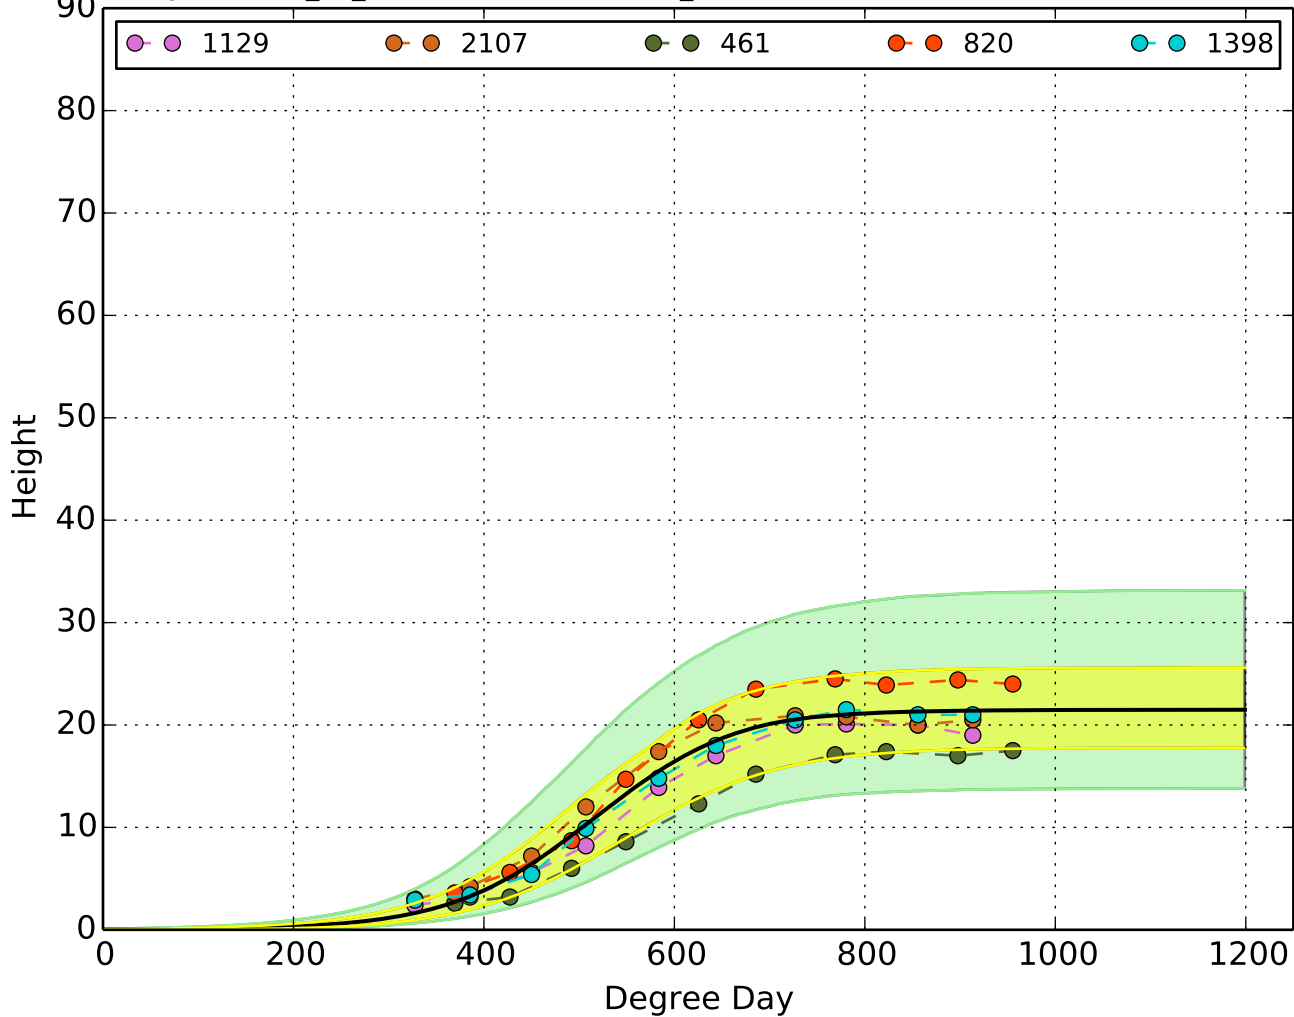

HeightModel3\_v1\_ResErrModel,Treat= CR\_2012,Line 318 (#Inv=6);95CI GrowthCurves

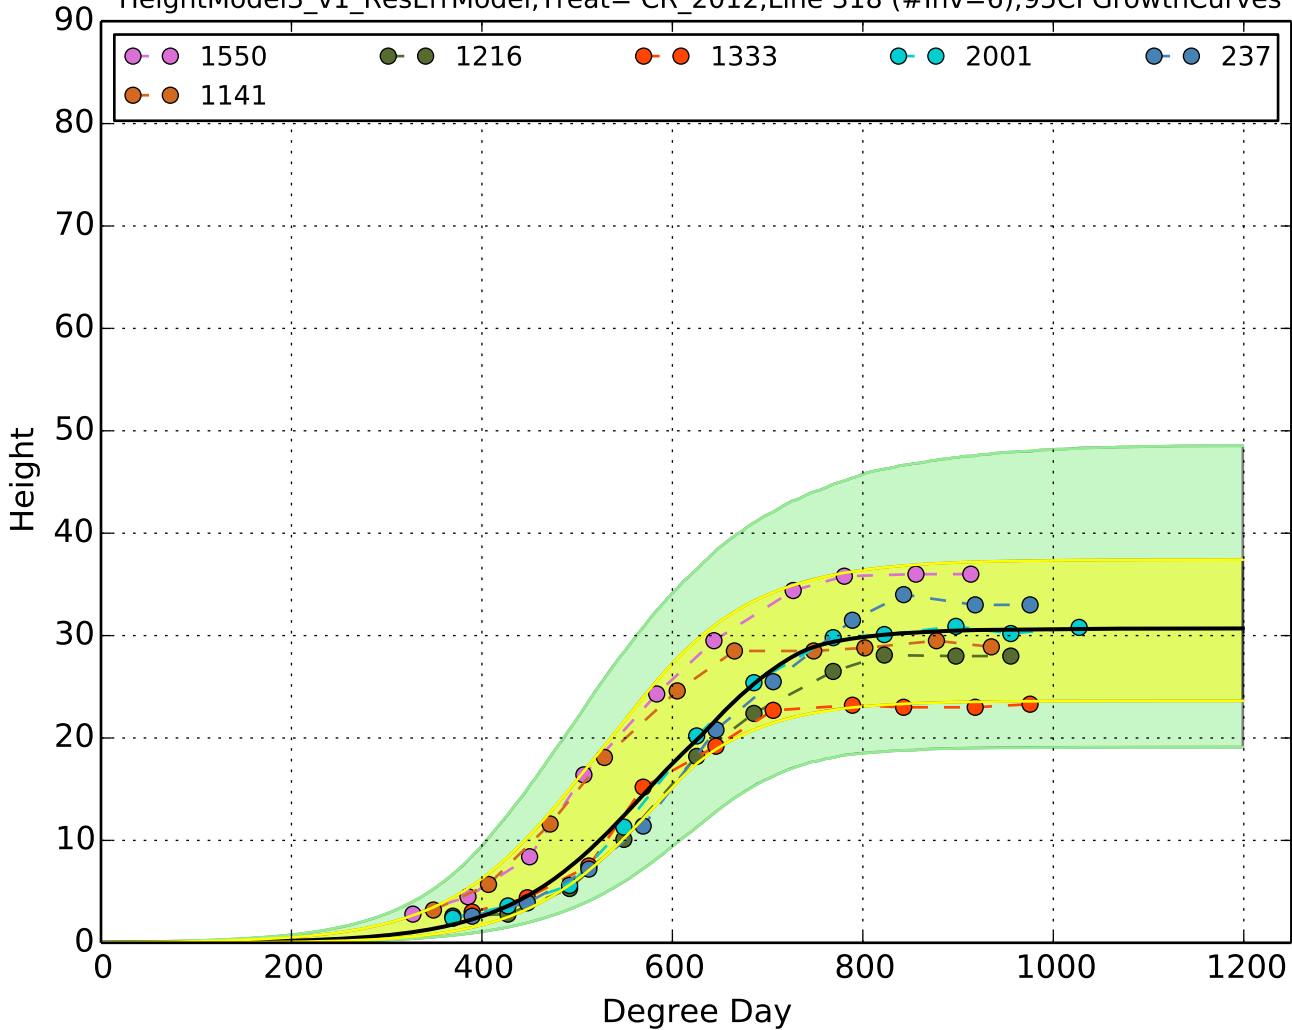

HeightModel3\_v1\_ResErrModel,Treat= CR\_2012,Line 325 (#Inv=8);95CI GrowthCurves

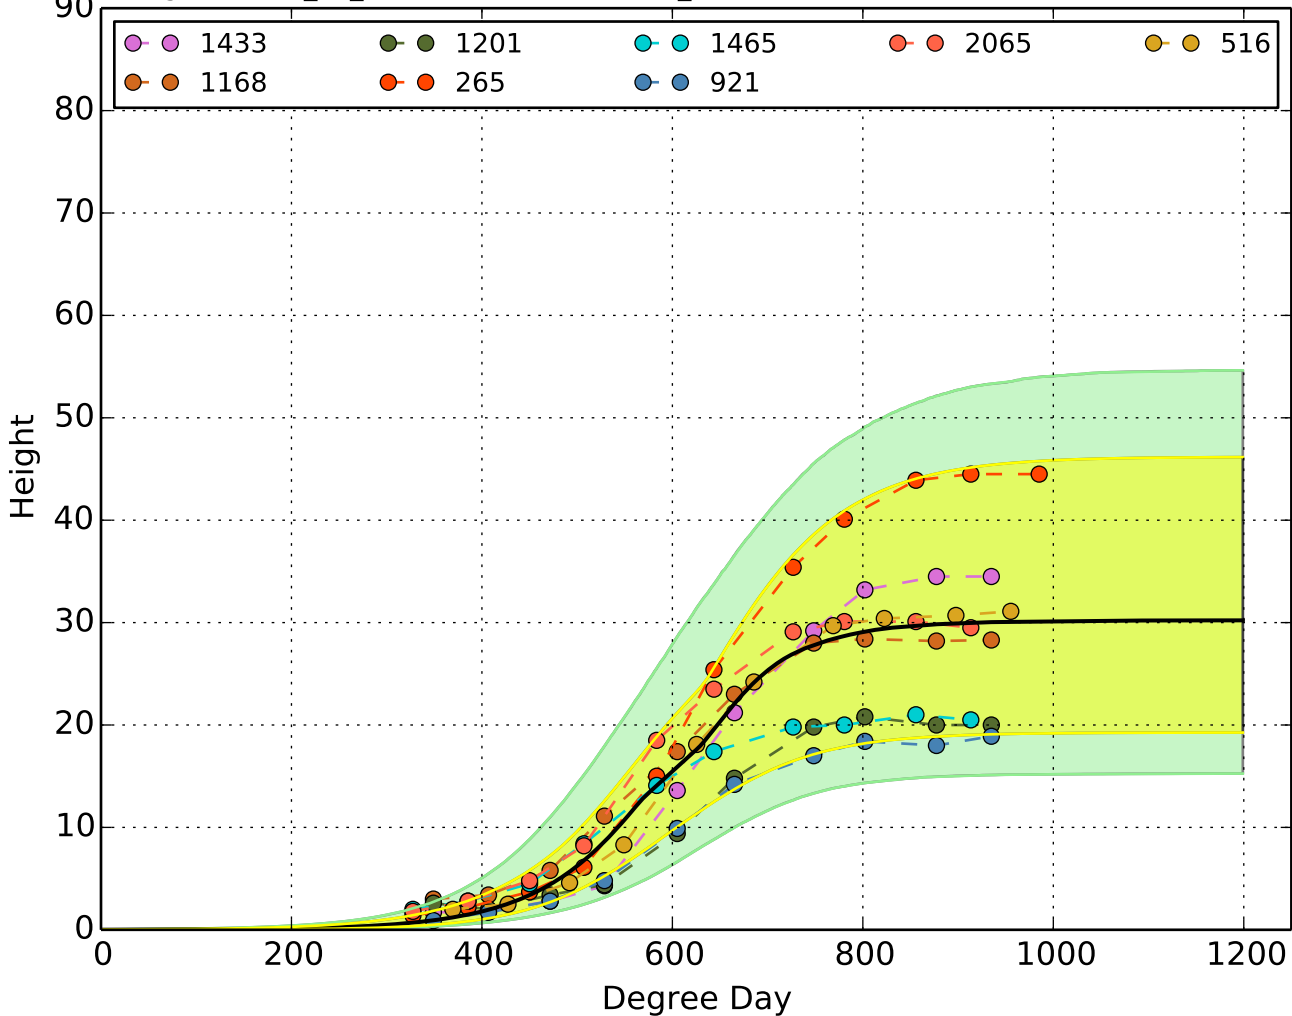

HeightModel3\_v1\_ResErrModel,Treat= CR\_2012,Line 328 (#Inv=6);95CI GrowthCurves

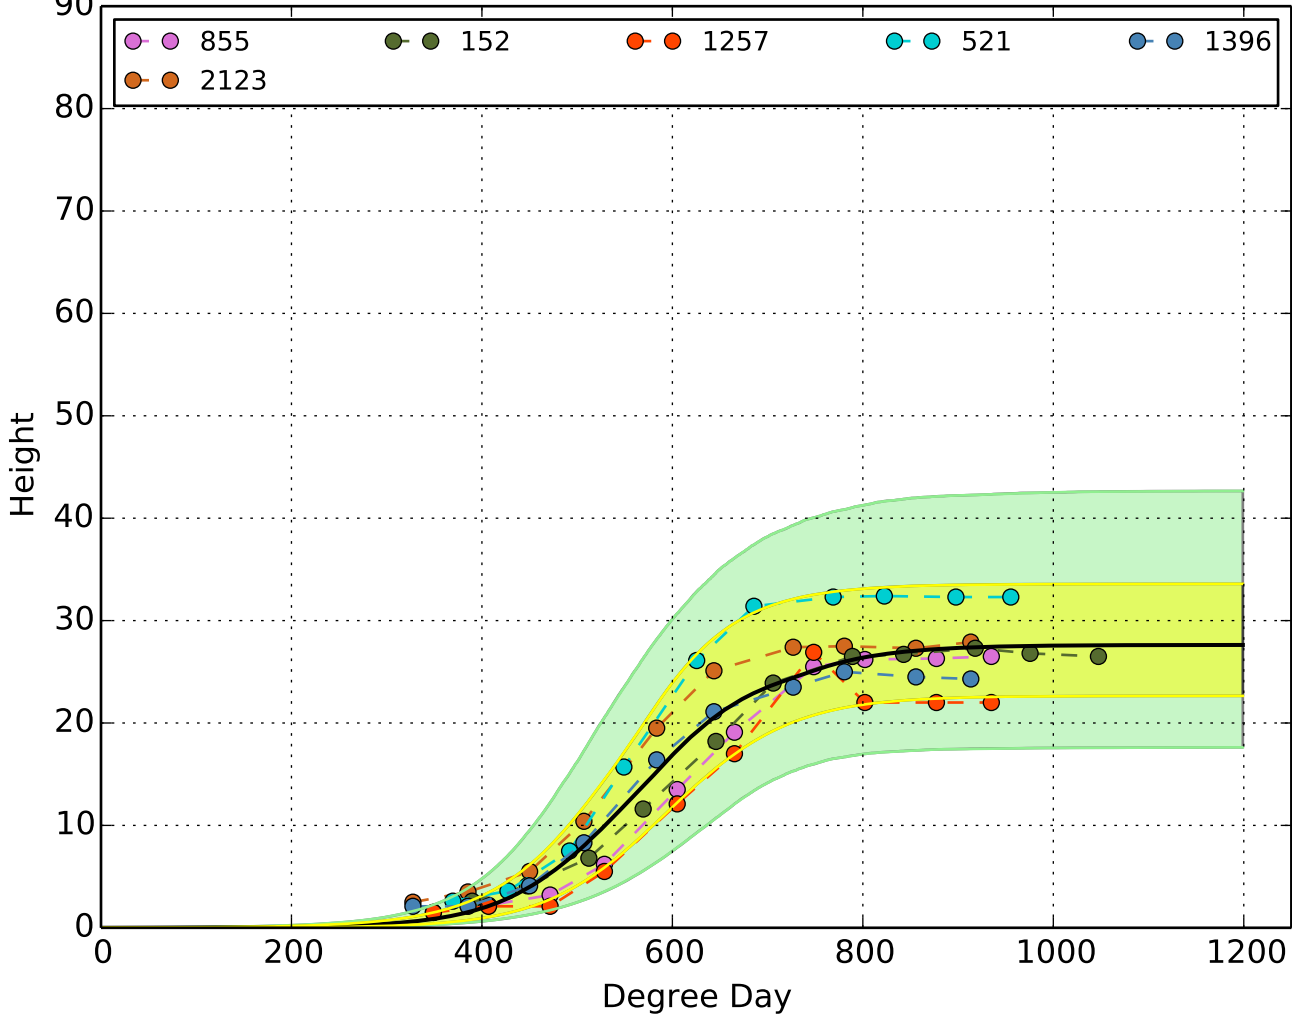

HeightModel3\_v1\_ResErrModel,Treat= CR\_2012,Line 332 (#Inv=8);95CI GrowthCurves

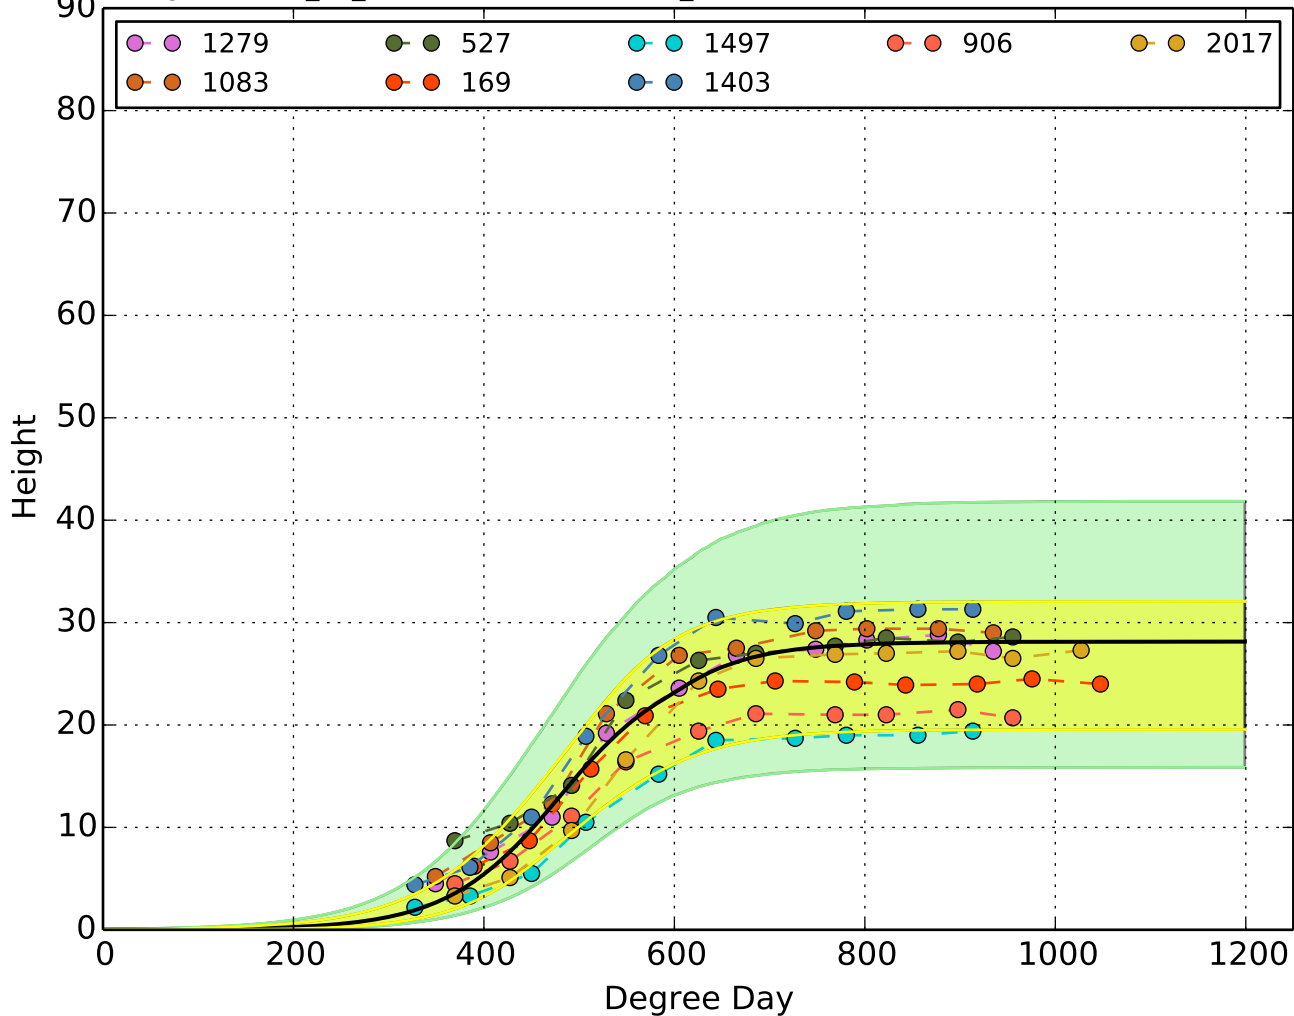

HeightModel3\_v1\_ResErrModel,Treat= CR\_2012,Line 337 (#Inv=8);95CI GrowthCurves

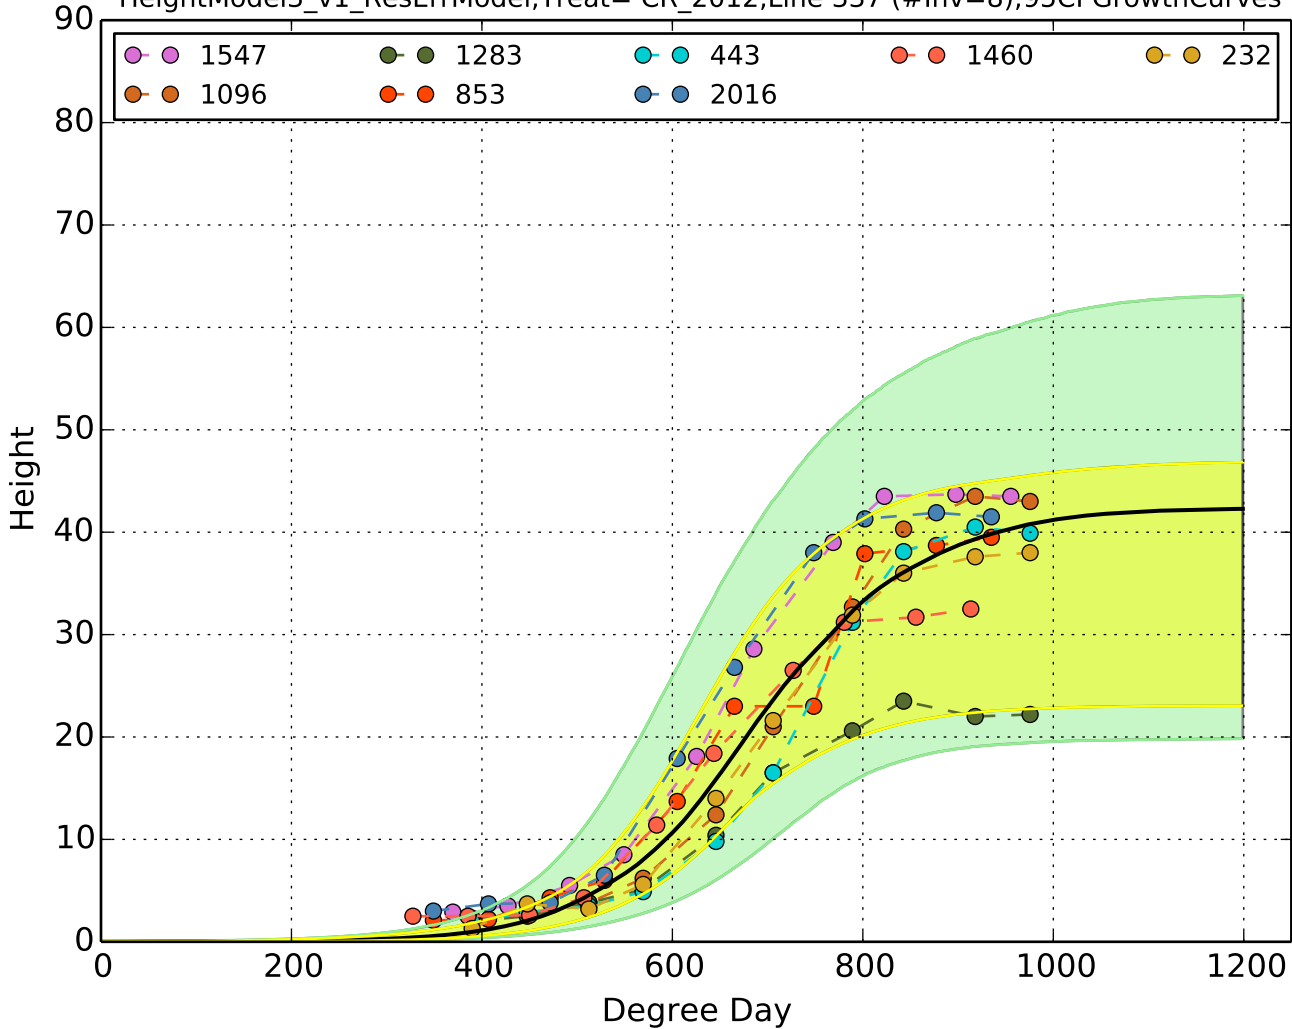



HeightModel3\_v1\_ResErrModel,Treat= CR\_2012,Line 339 (#Inv=21);95CI GrowthCurves

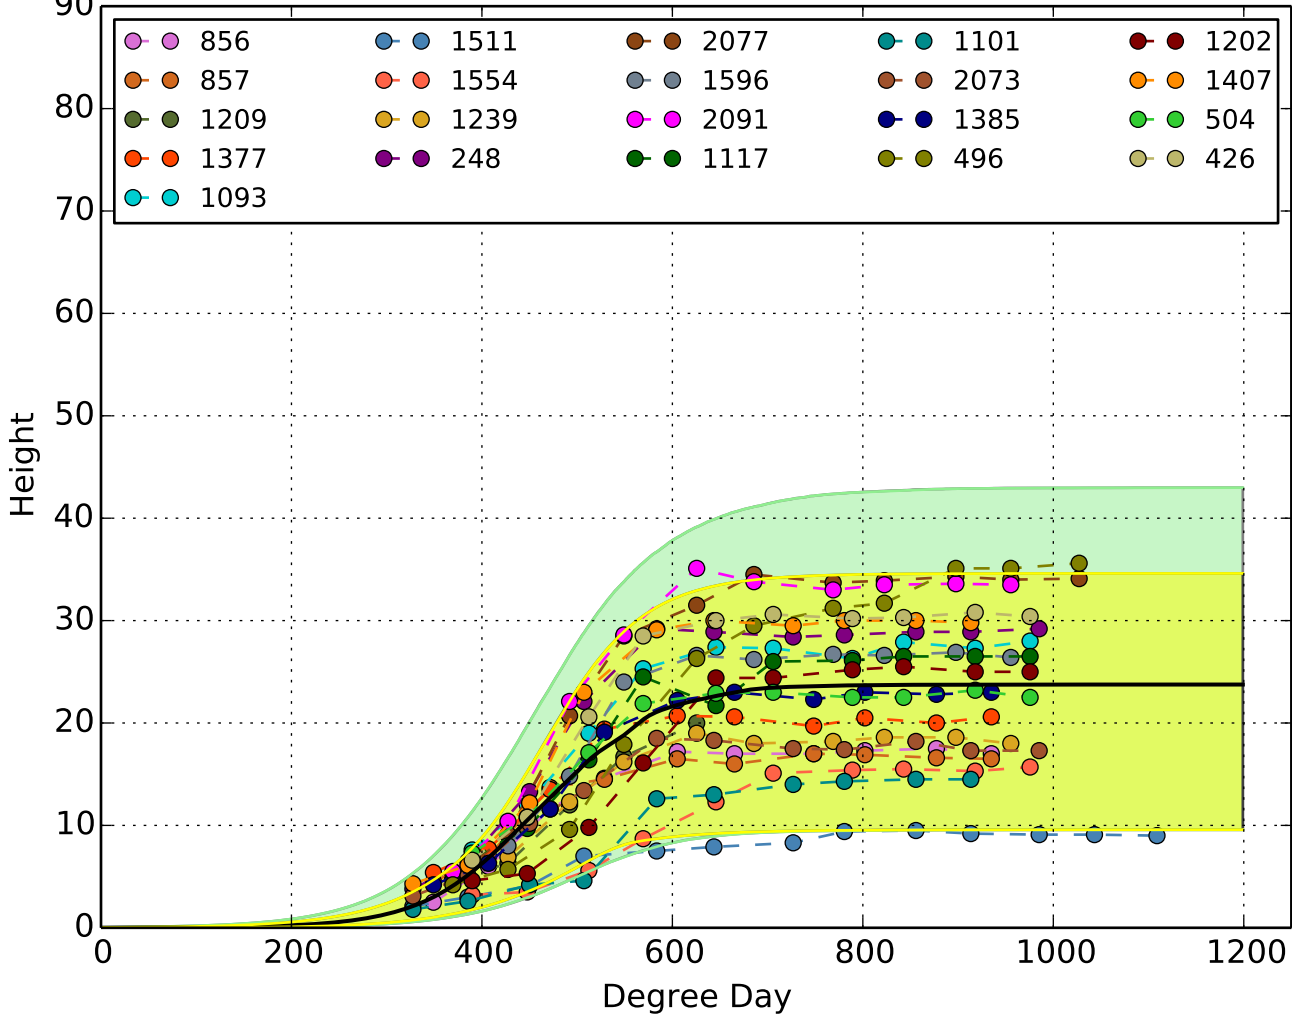

HeightModel3\_v1\_ResErrModel,Treat= CR\_2012,Line 340 (#Inv=7);95CI GrowthCurves

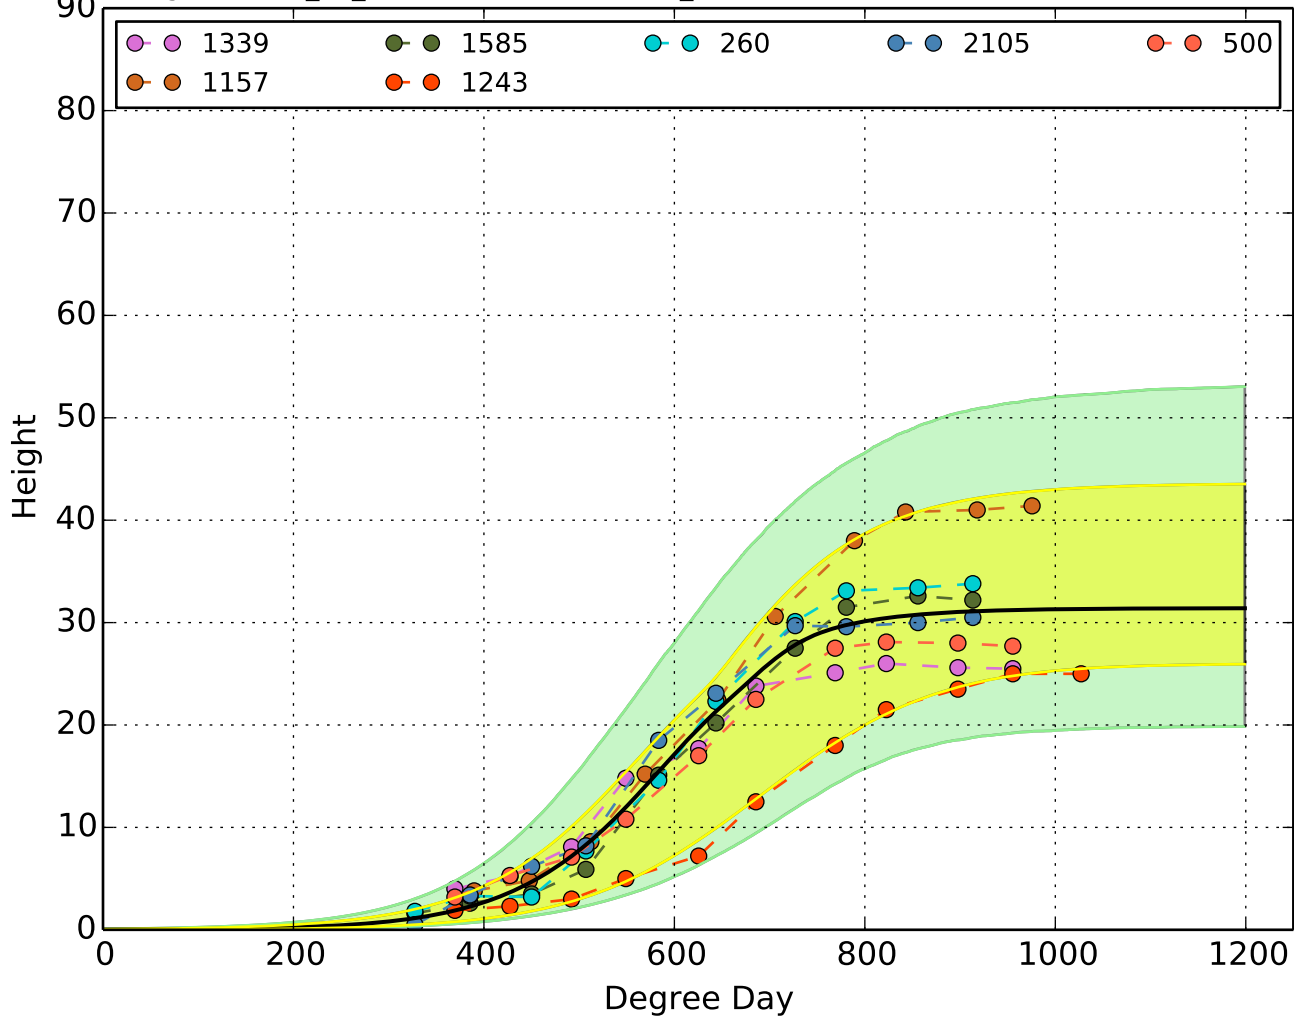

HeightModel3\_v1\_ResErrModel,Treat= CR\_2012,Line 341 (#Inv=6);95CI GrowthCurves

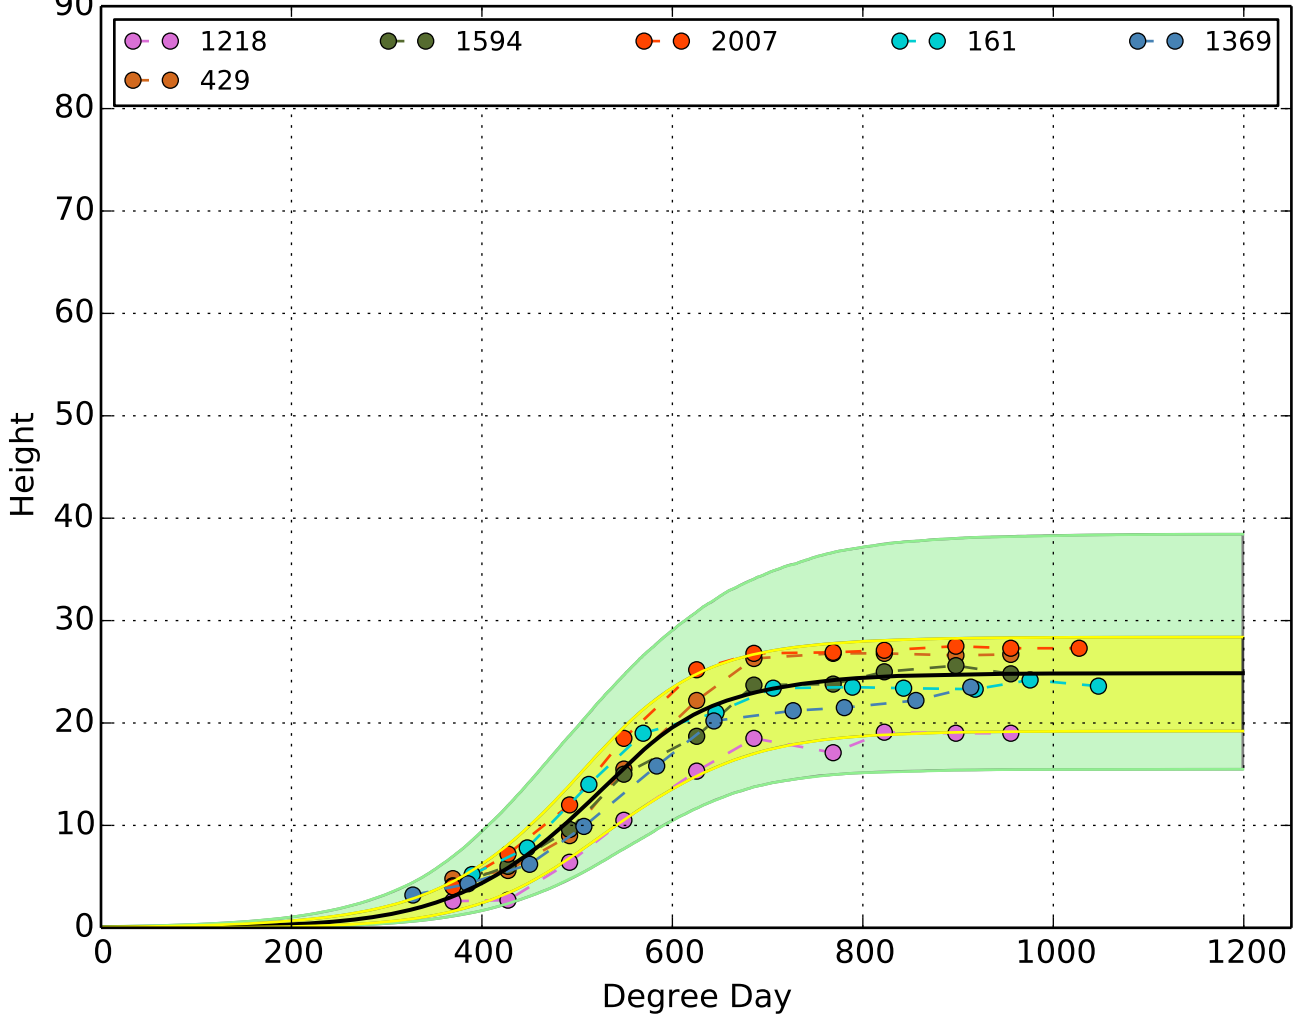

HeightModel3\_v1\_ResErrModel,Treat= CR\_2012,Line 344 (#Inv=7);95CI GrowthCurves

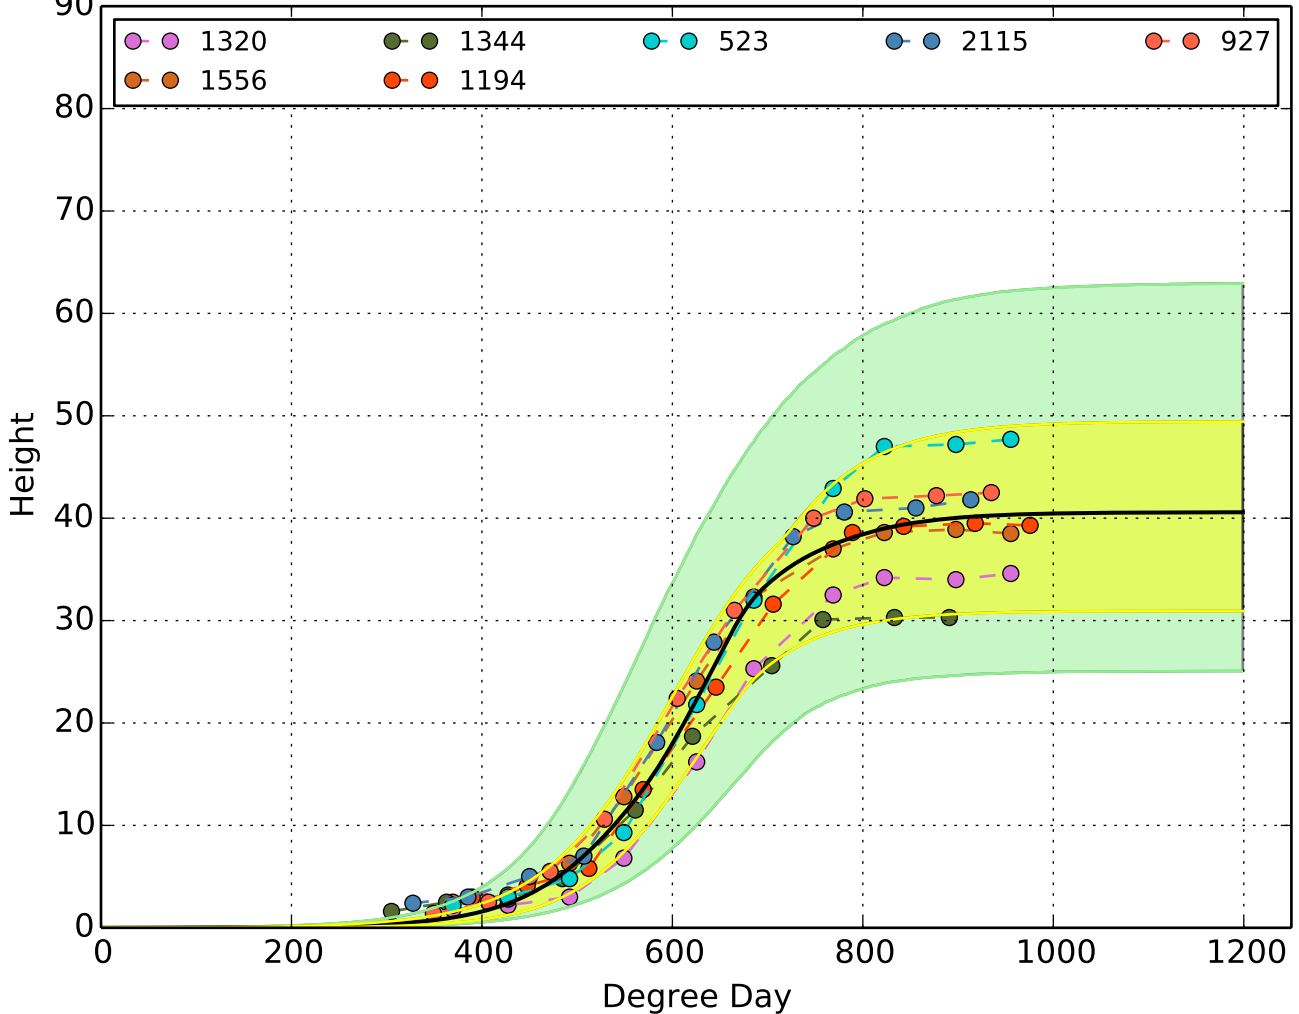

HeightModel3\_v1\_ResErrModel,Treat= CR\_2012,Line 346 (#Inv=5);95CI GrowthCurves

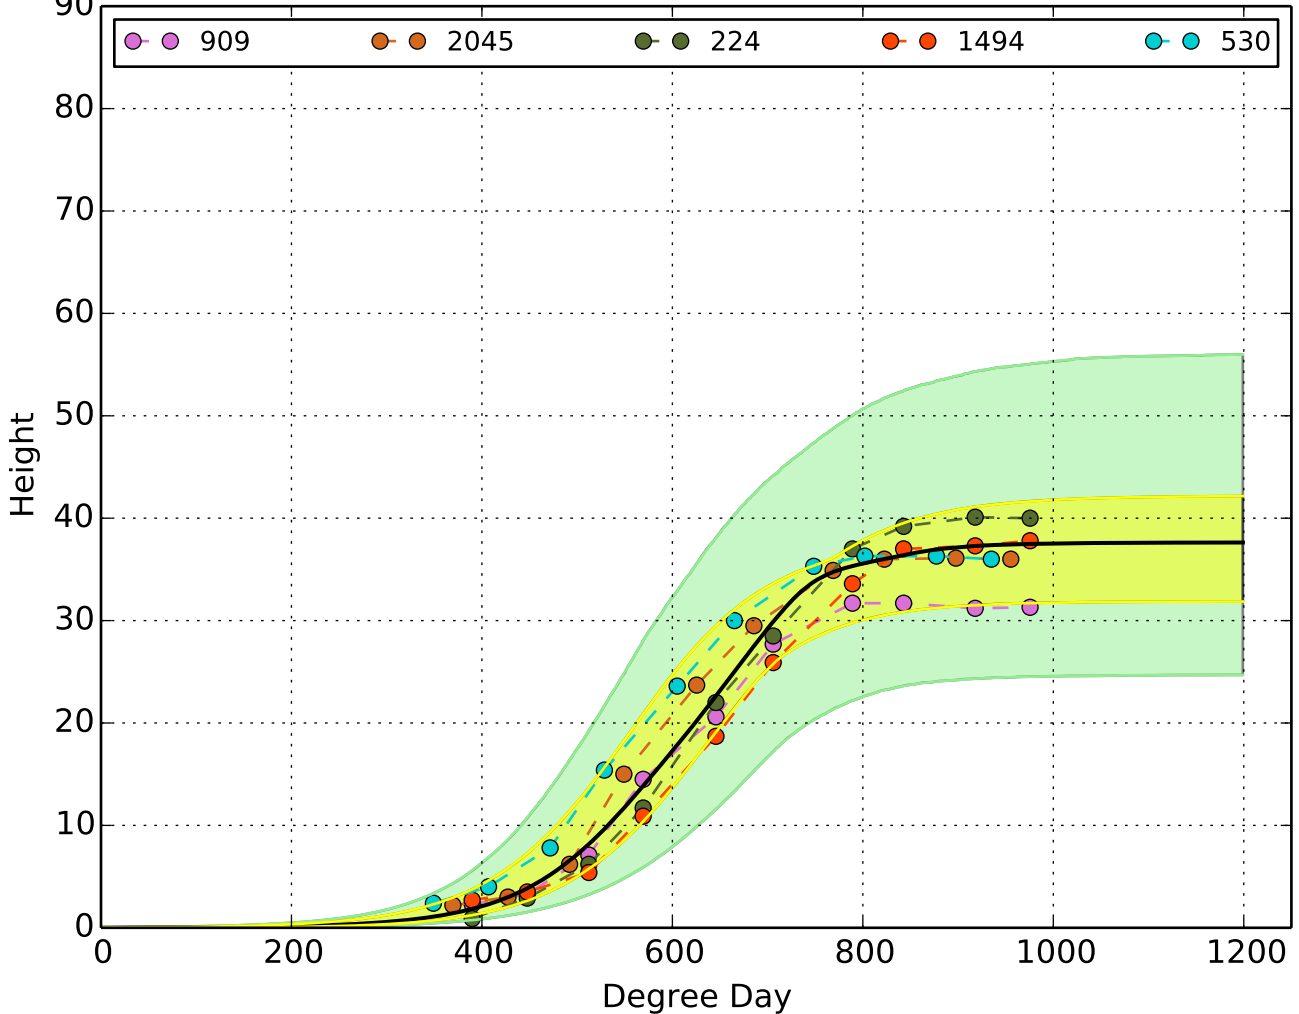

HeightModel3\_v1\_ResErrModel,Treat= CR\_2012,Line 347 (#Inv=13);95CI GrowthCurves

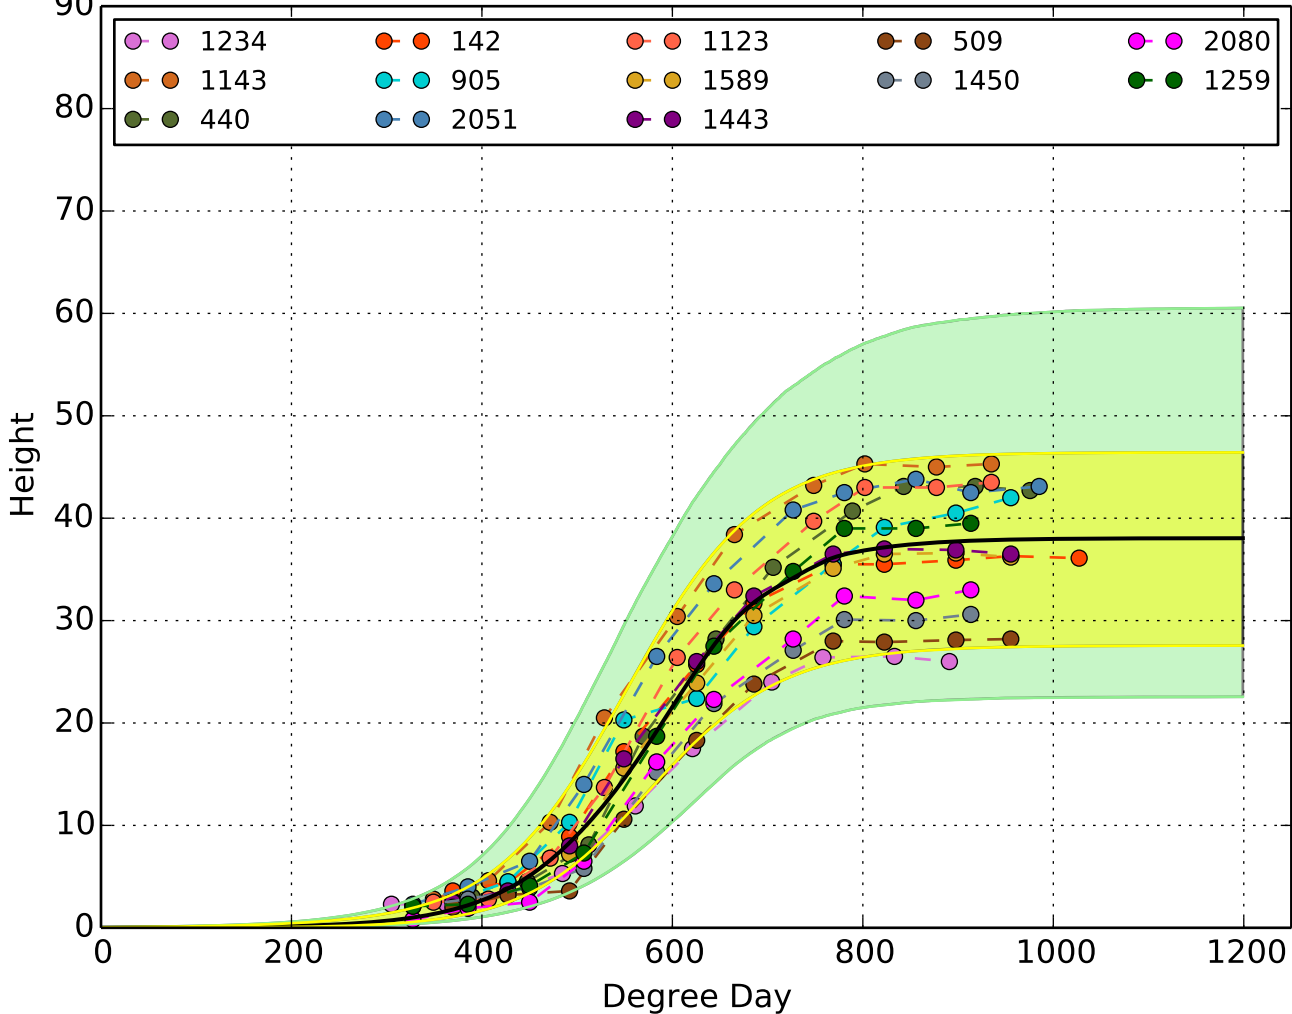

HeightModel3\_v1\_ResErrModel,Treat= CR\_2012,Line 353 (#Inv=6);95CI GrowthCurves

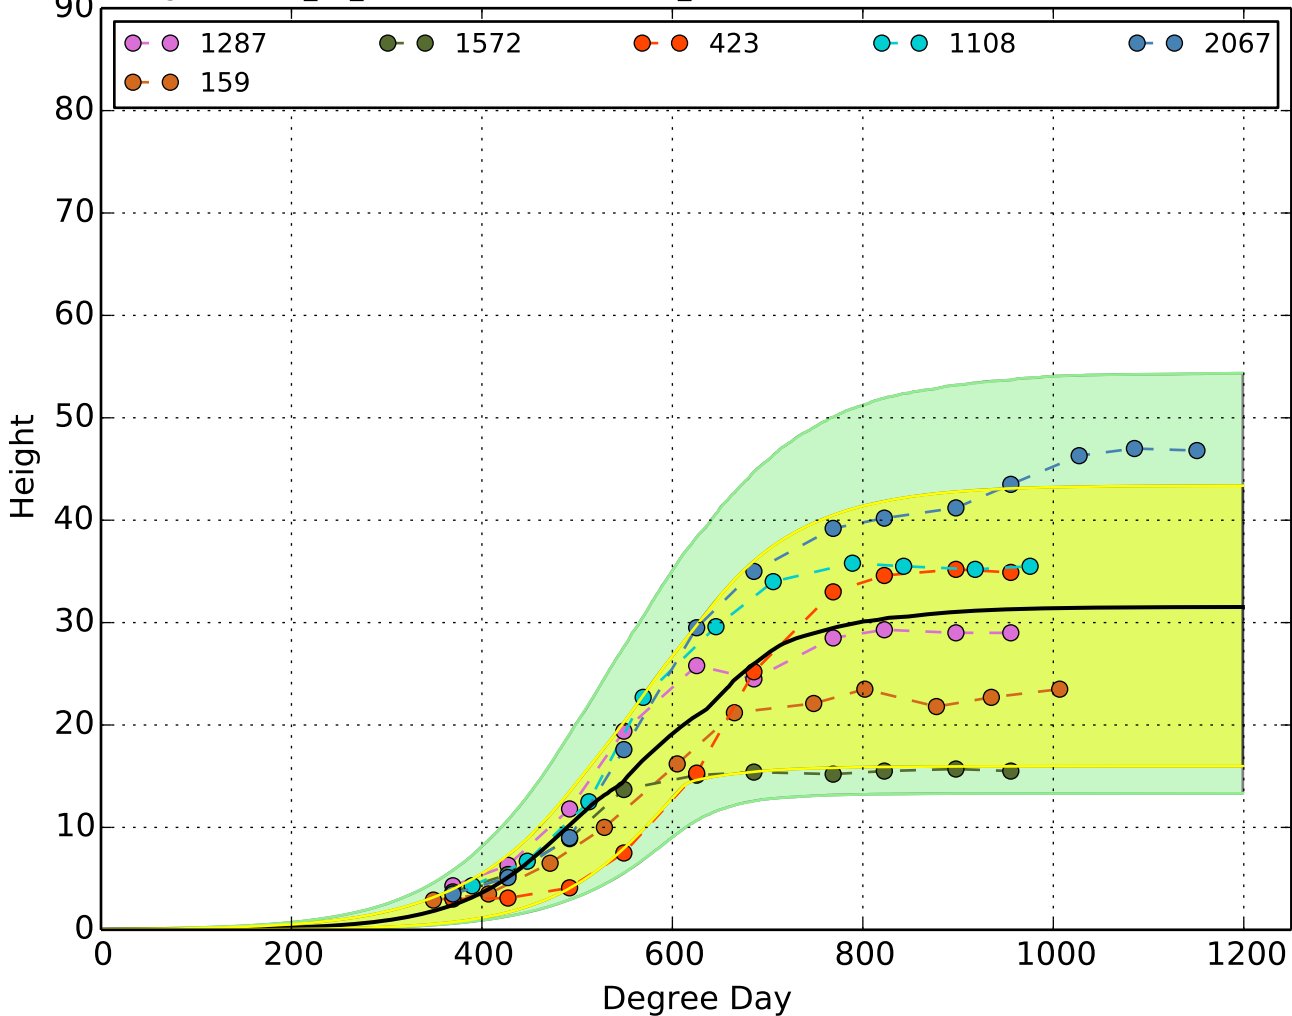

HeightModel3\_v1\_ResErrModel,Treat= CR\_2012,Line 354 (#Inv=8);95CI GrowthCurves

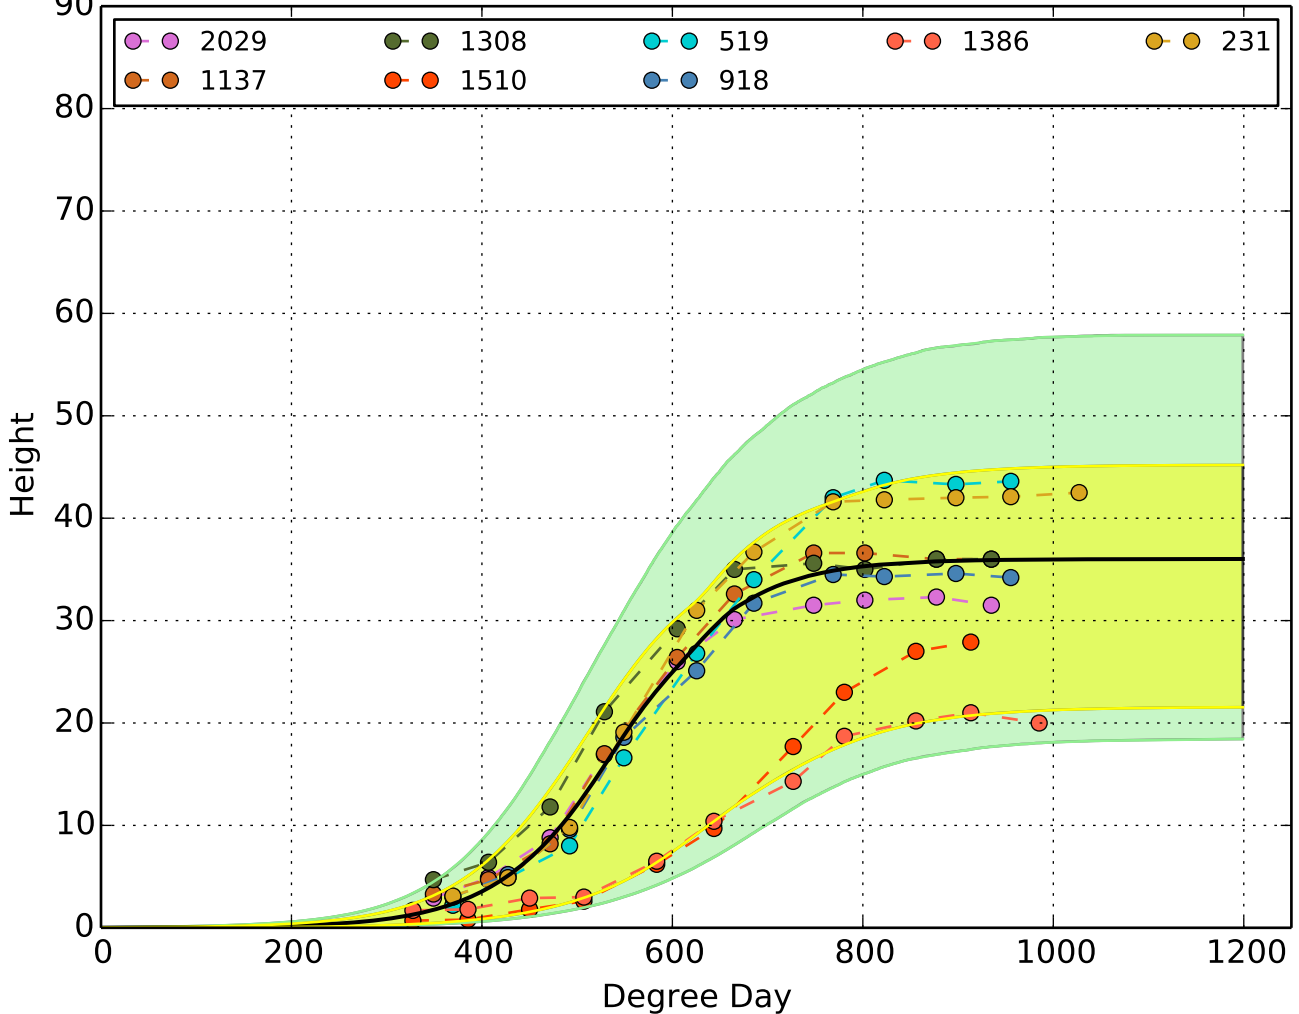



HeightModel3\_v1\_ResErrModel,Treat= CR\_2012,Line 355 (#Inv=7);95CI GrowthCurves

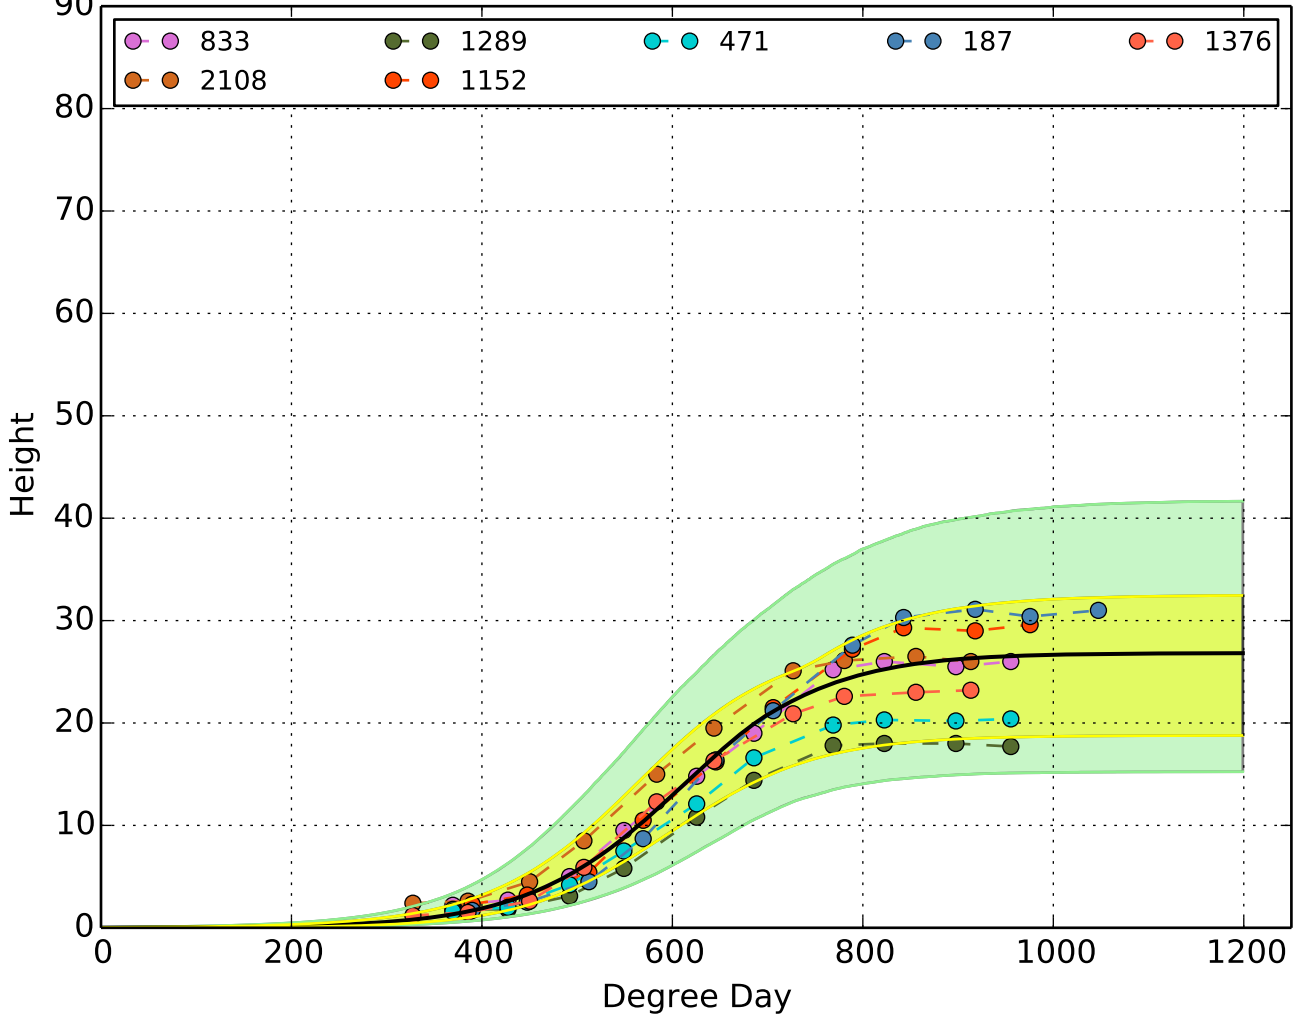

HeightModel3\_v1\_ResErrModel,Treat= CR\_2012,Line 357 (#Inv=6);95CI GrowthCurves

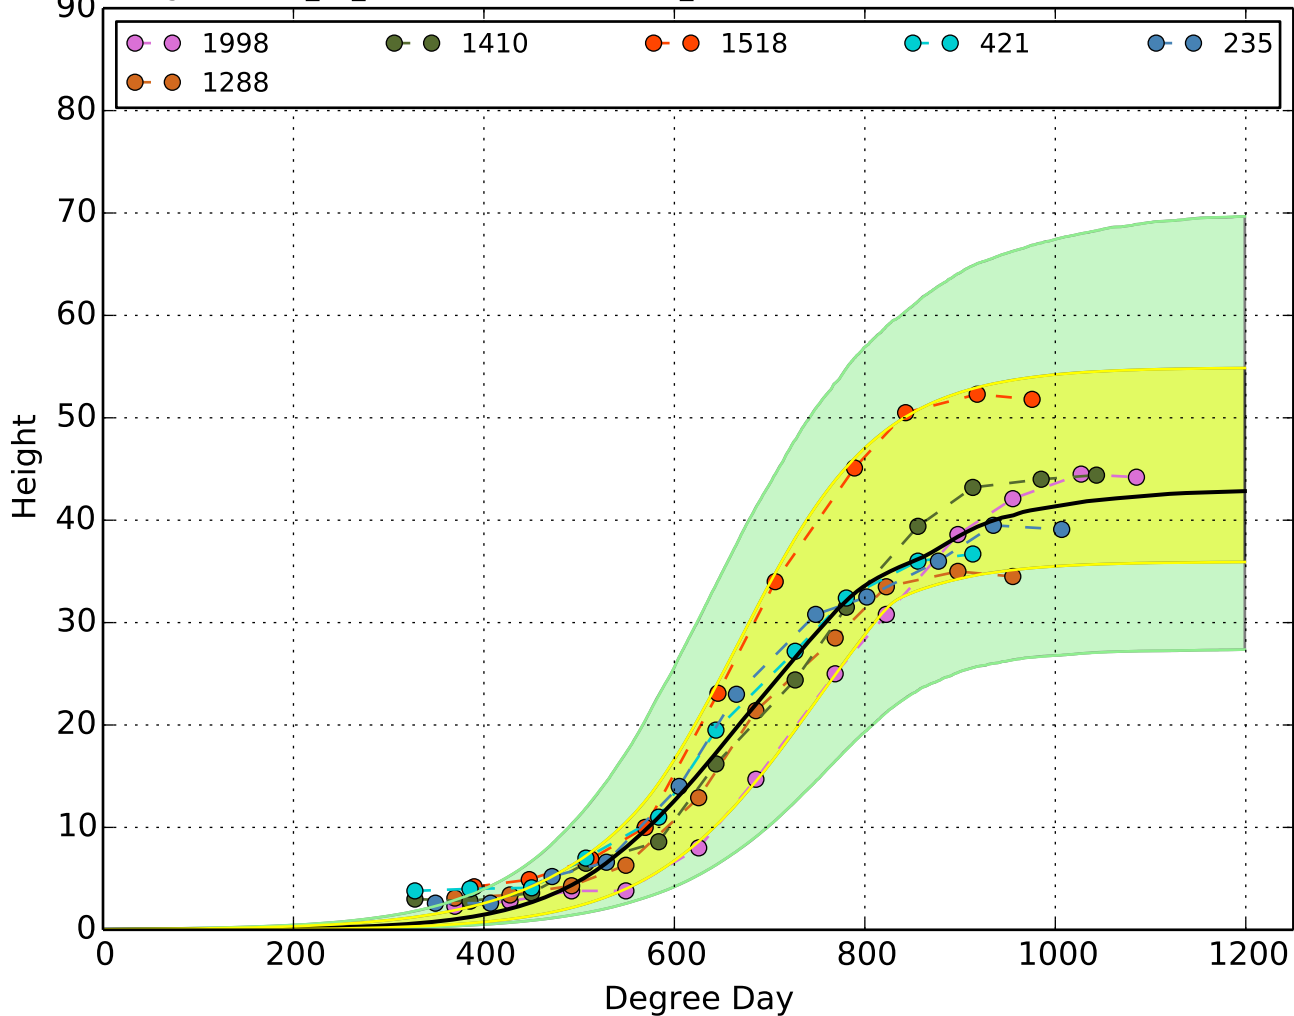

HeightModel3\_v1\_ResErrModel,Treat= CR\_2012,Line 359 (#Inv=6);95CI GrowthCurves

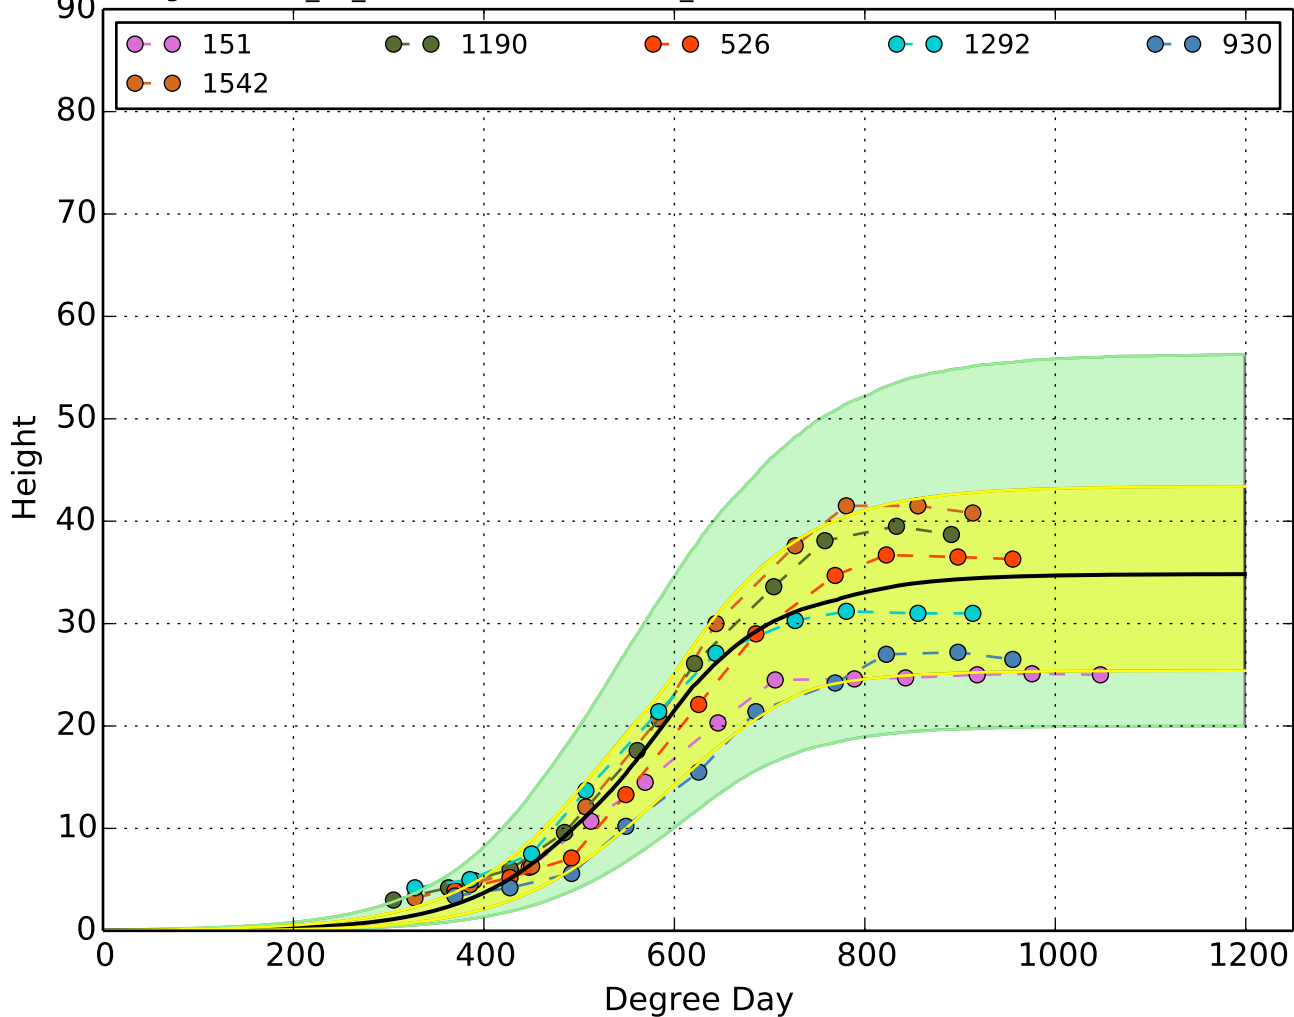

HeightModel3\_v1\_ResErrModel,Treat= CR\_2012,Line 360 (#Inv=7);95CI GrowthCurves

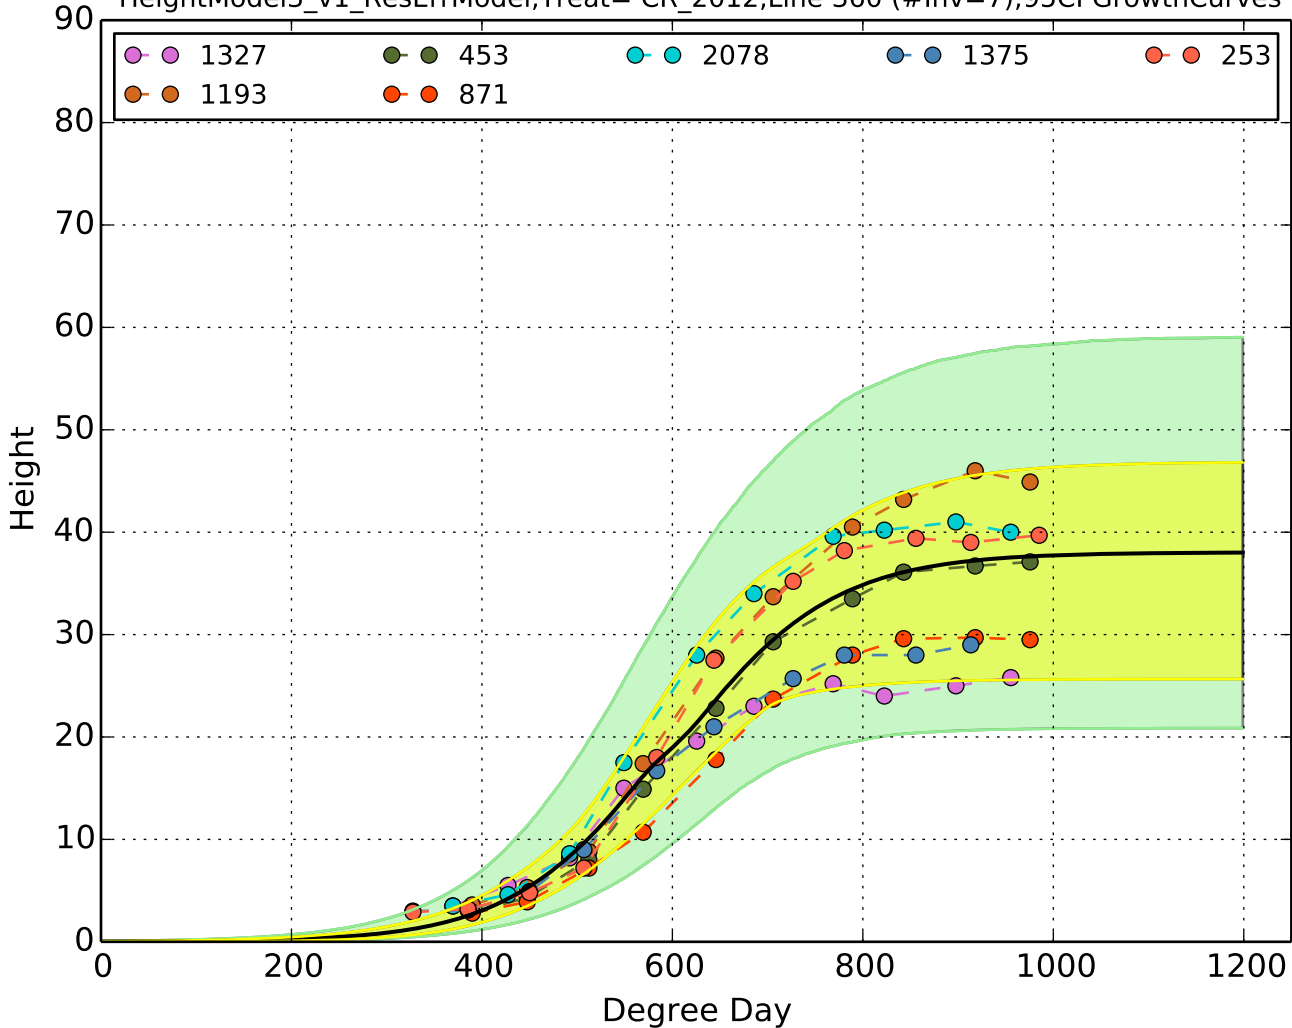

HeightModel3\_v1\_ResErrModel,Treat= CR\_2012,Line 363 (#Inv=8);95CI GrowthCurves

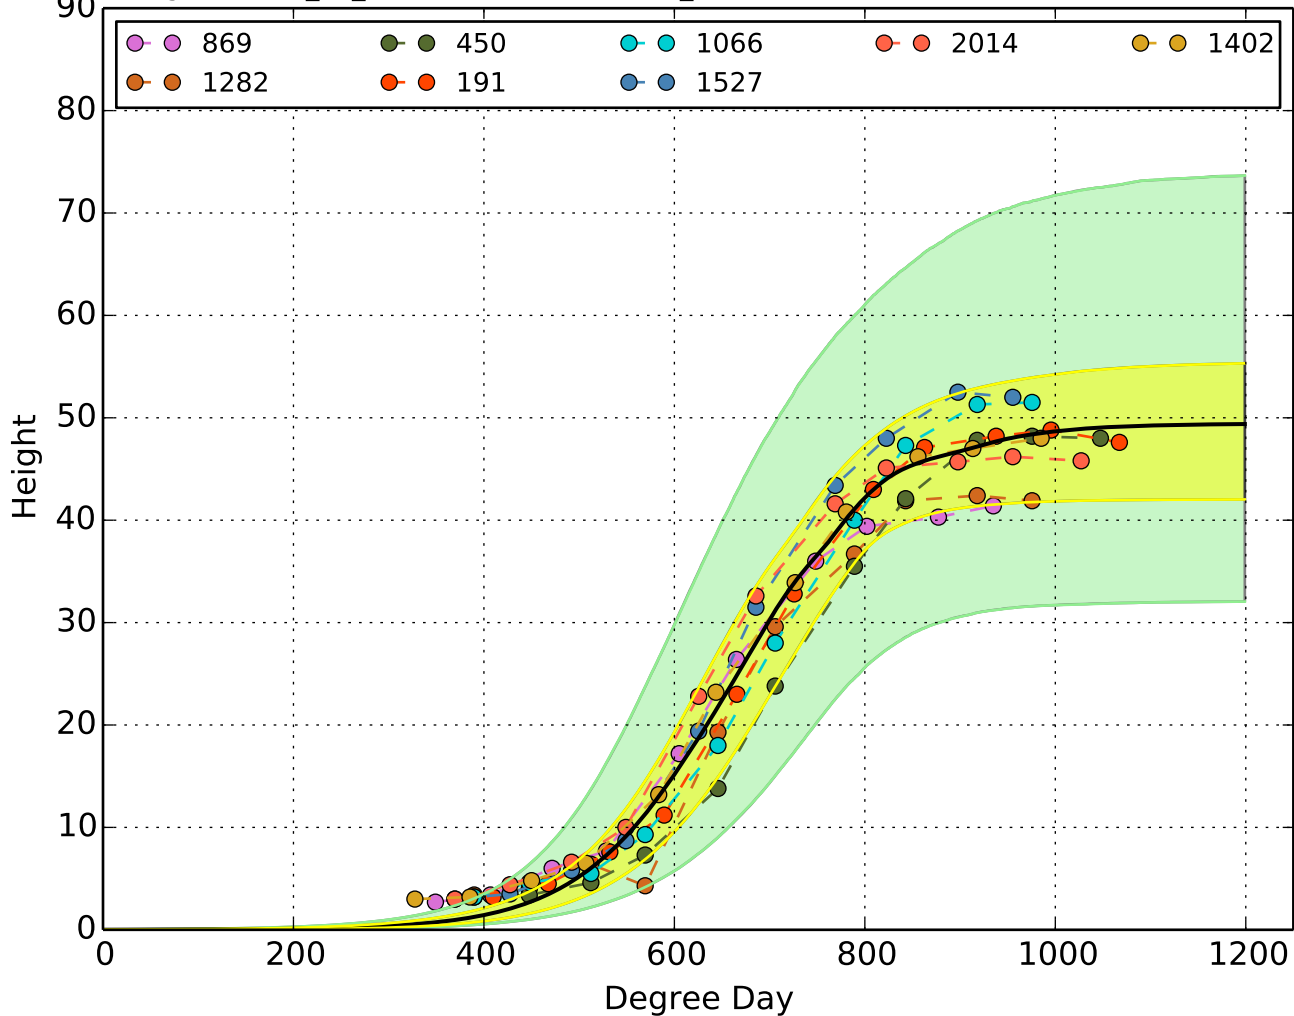

HeightModel3\_v1\_ResErrModel,Treat= CR\_2012,Line 373 (#Inv=7);95CI GrowthCurves

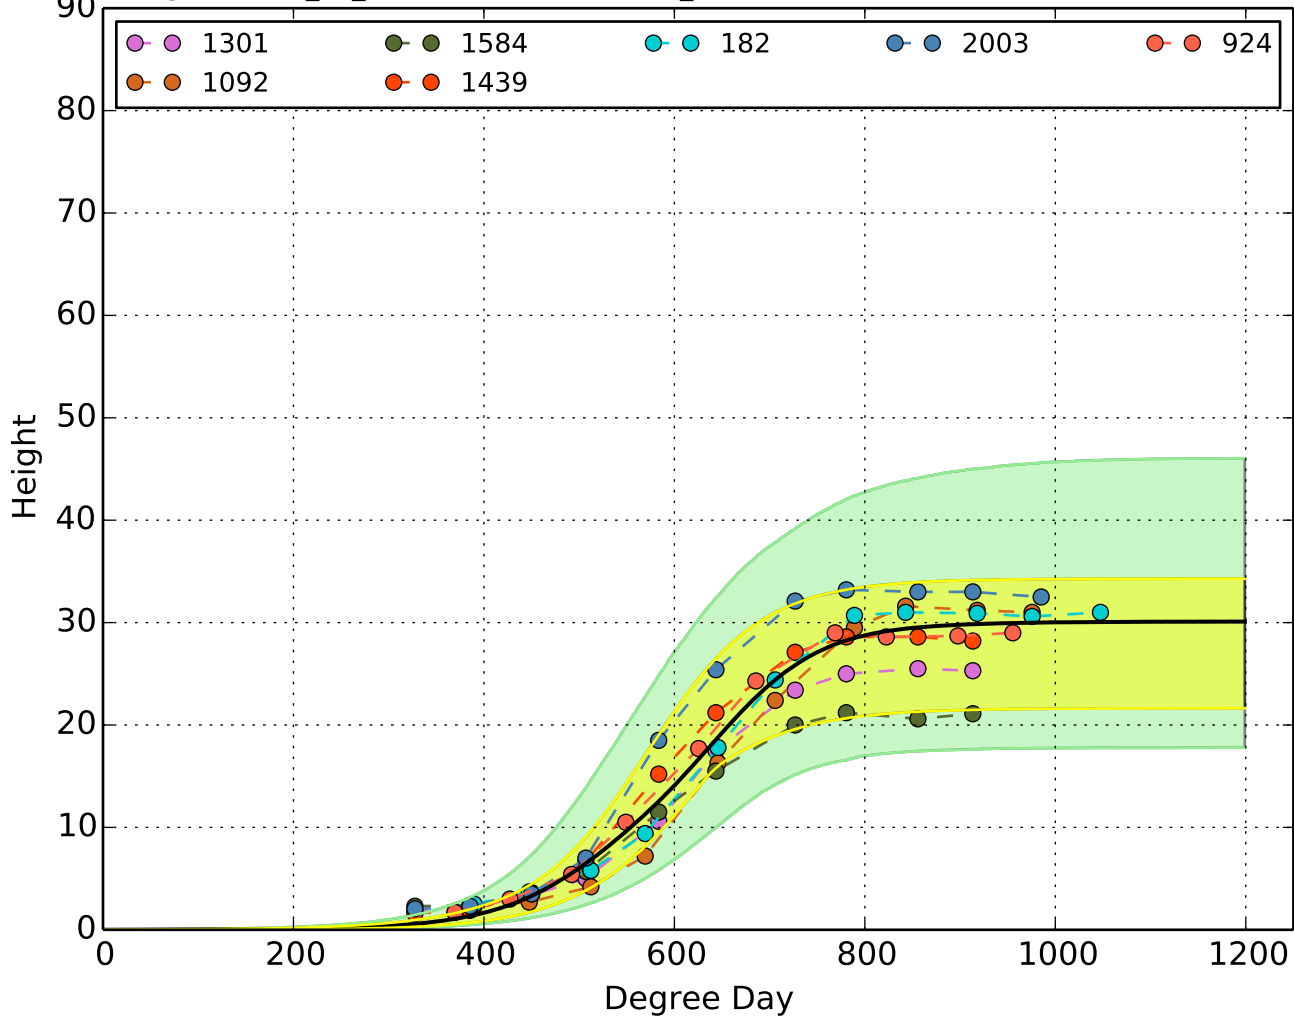

HeightModel3\_v1\_ResErrModel,Treat= CR\_2012,Line 376 (#Inv=5);95CI GrowthCurves

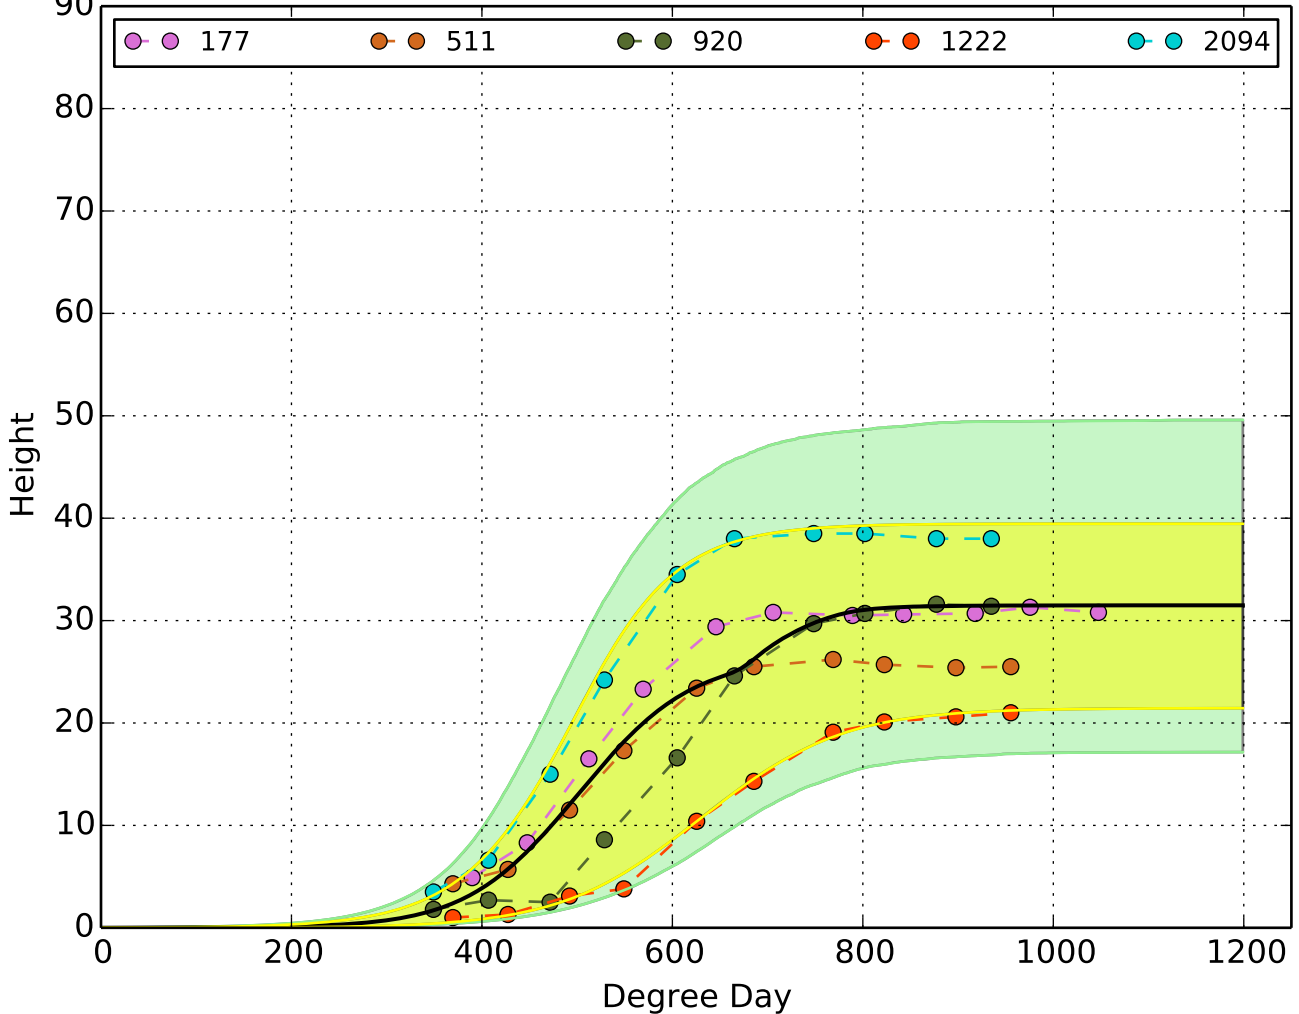

HeightModel3\_v1\_ResErrModel,Treat= CR\_2012,Line 380 (#Inv=8);95CI GrowthCurves

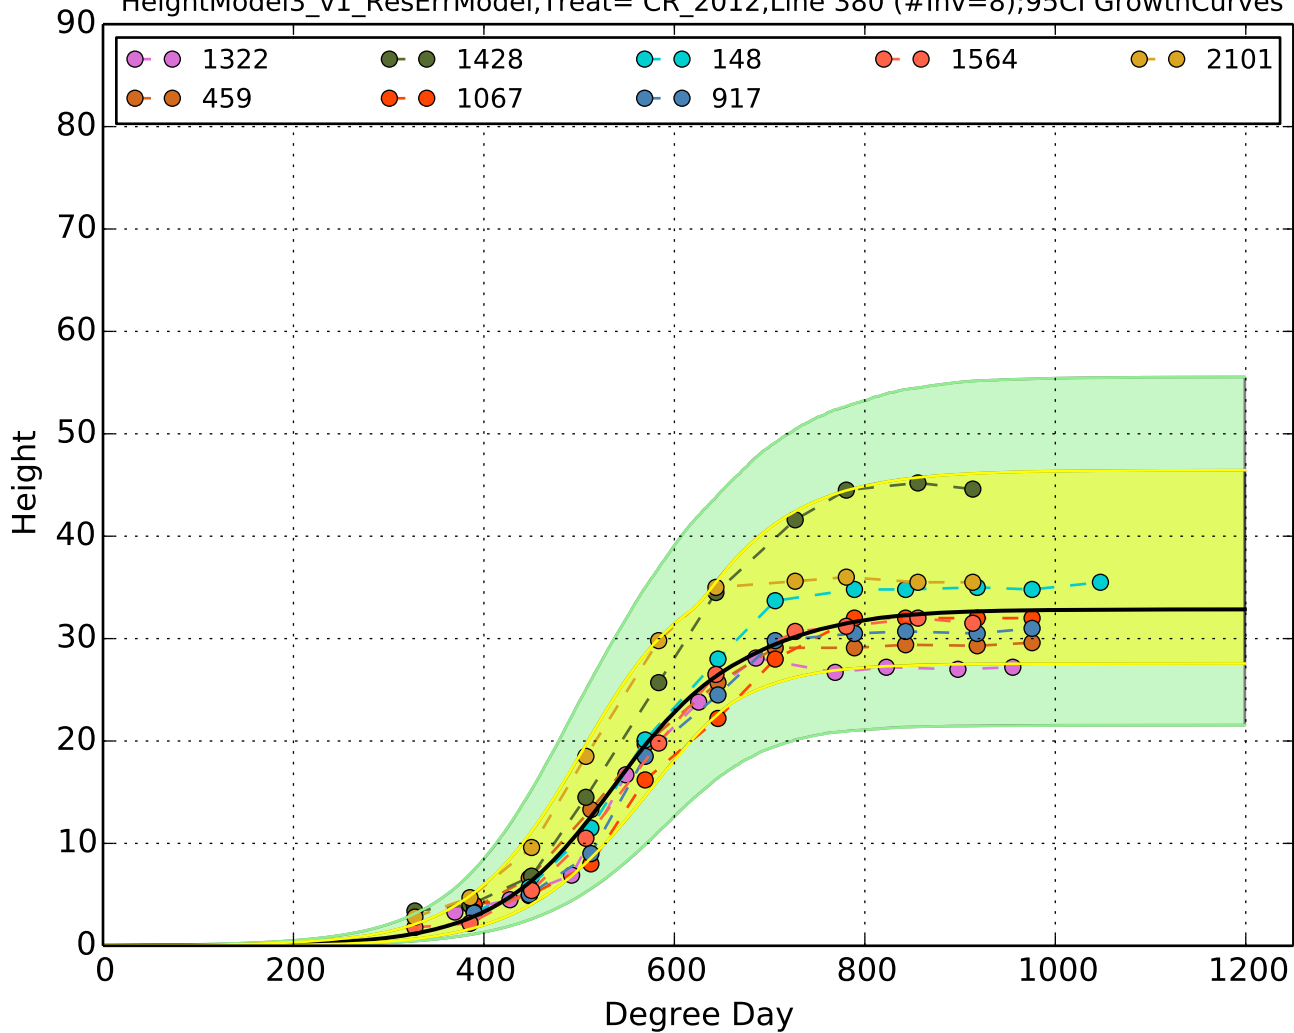



HeightModel3\_v1\_ResErrModel,Treat= CR\_2012,Line 500 (#Inv=8);95CI GrowthCurves

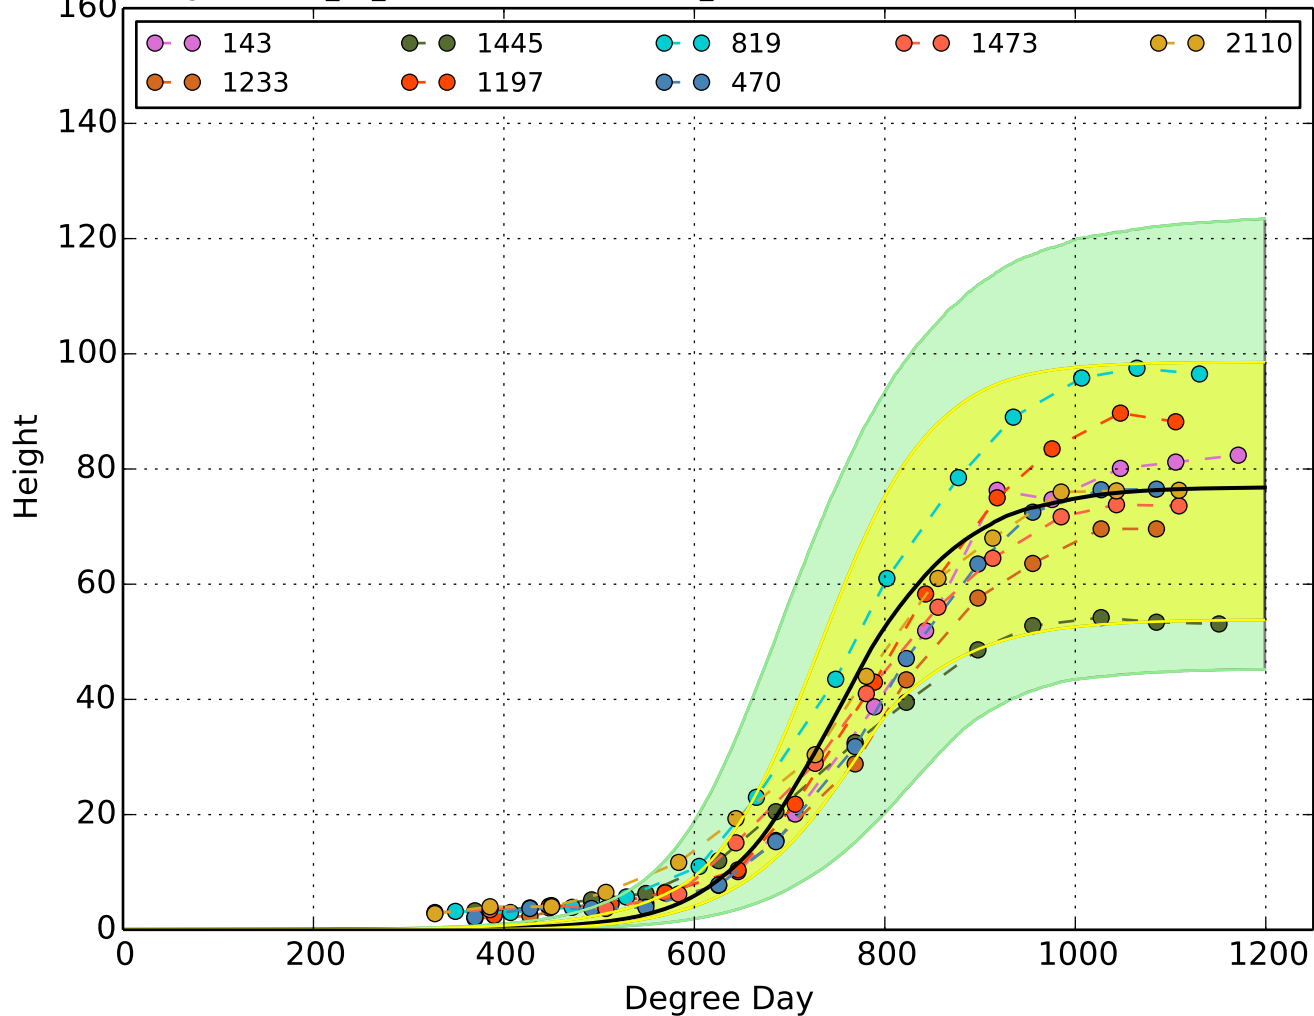

HeightModel3\_v1\_ResErrModel,Treat= CR\_2012,Line 511 (#Inv=8);95CI GrowthCurves

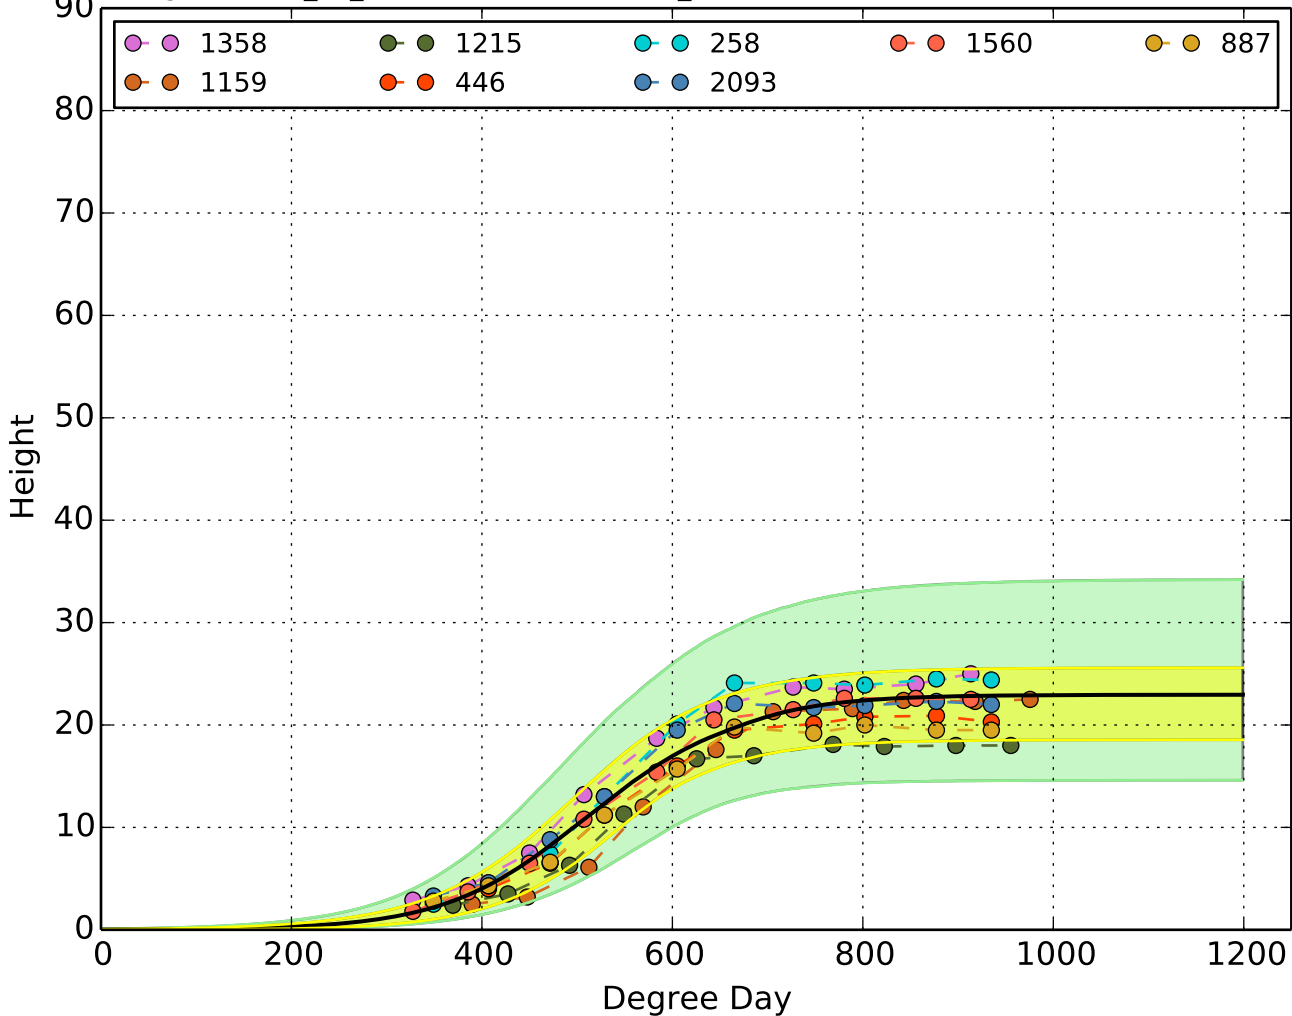

HeightModel3\_v1\_ResErrModel,Treat= CR\_2012,Line 1 (#Inv=5);95CI GrowthCurves

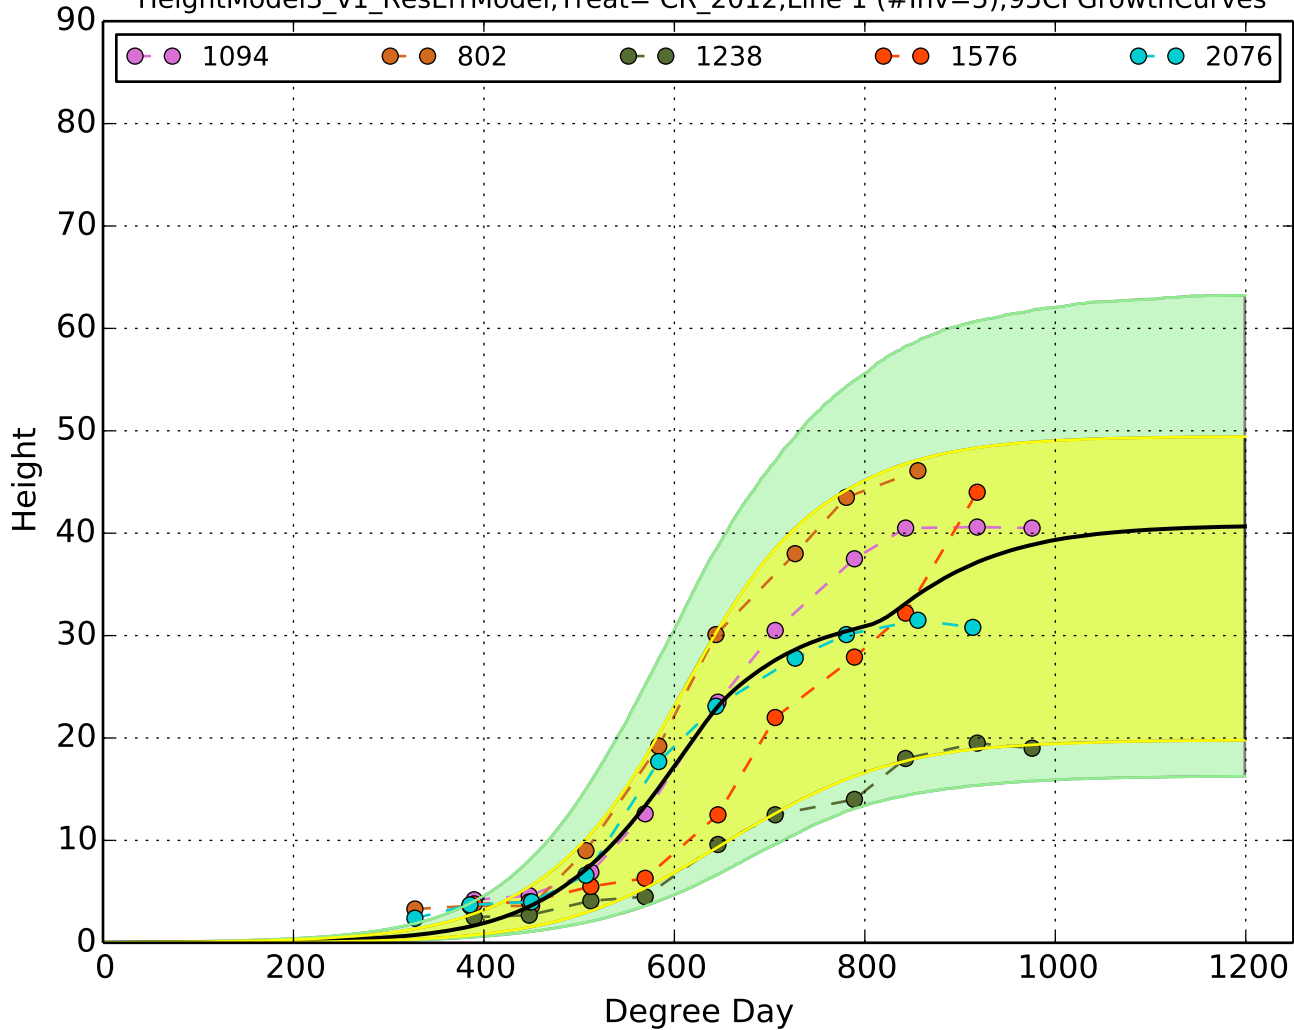

HeightModel3\_v1\_ResErrModel,Treat= CR\_2012,Line 2 (#Inv=5);95CI GrowthCurves

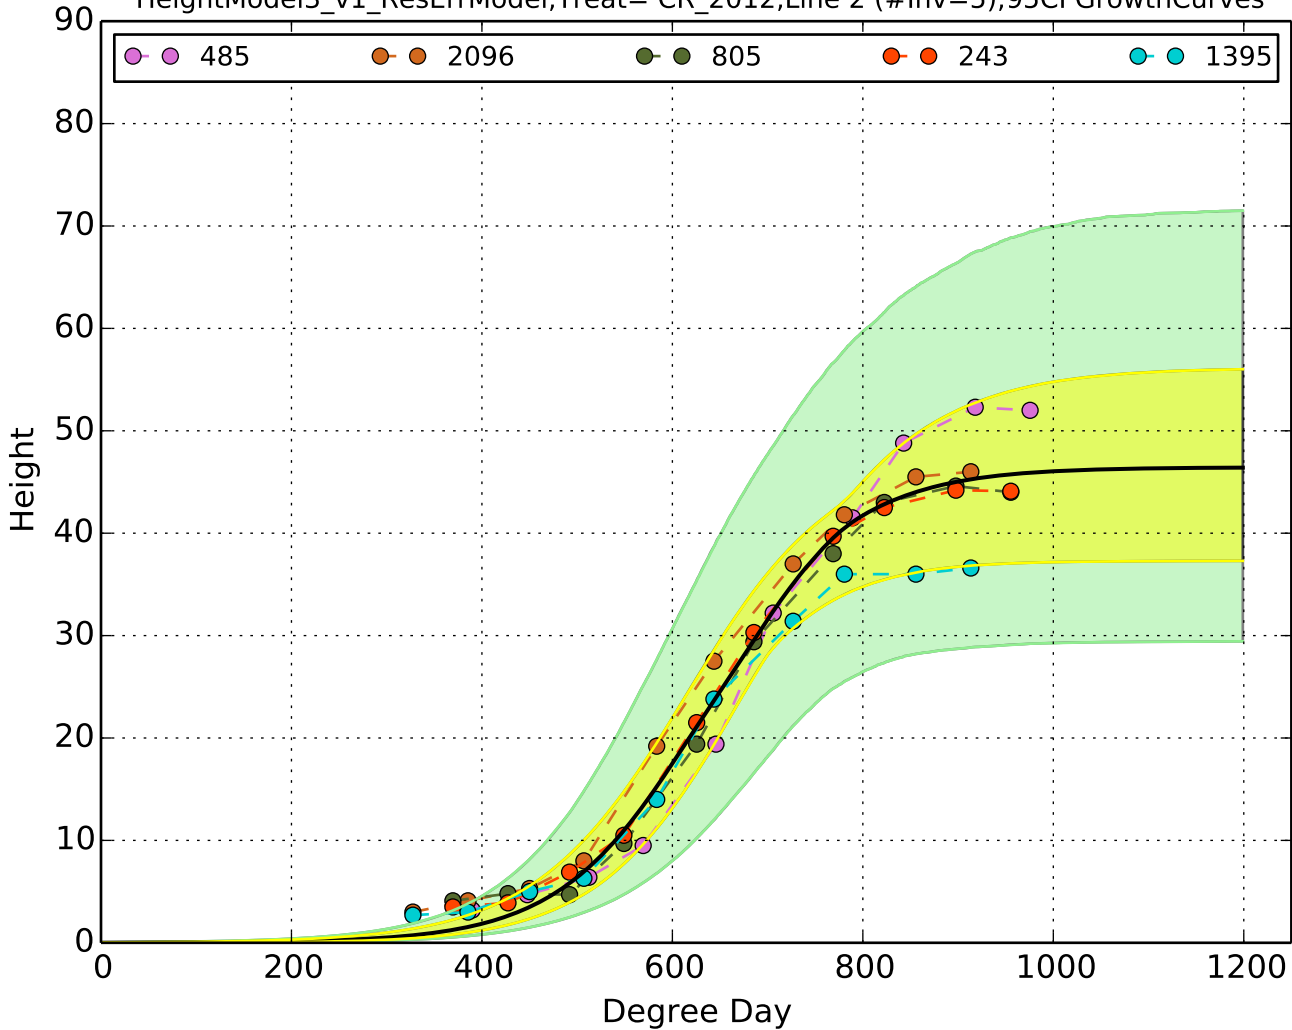

HeightModel3\_v1\_ResErrModel,Treat= CR\_2012,Line 7 (#Inv=6);95CI GrowthCurves

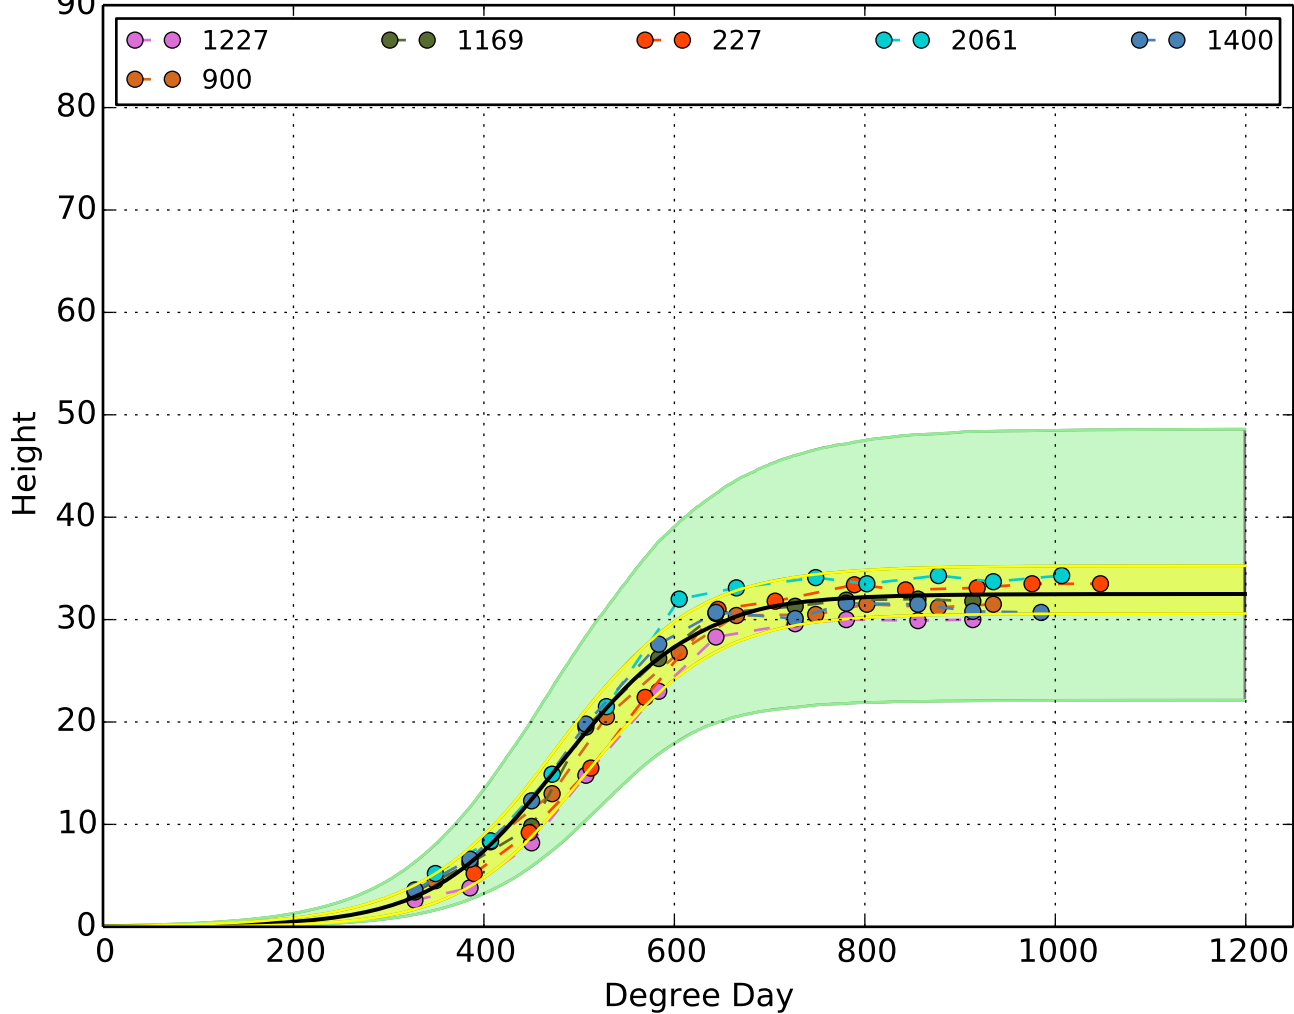

HeightModel3\_v1\_ResErrModel,Treat= CR\_2012,Line 9 (#Inv=7);95CI GrowthCurves

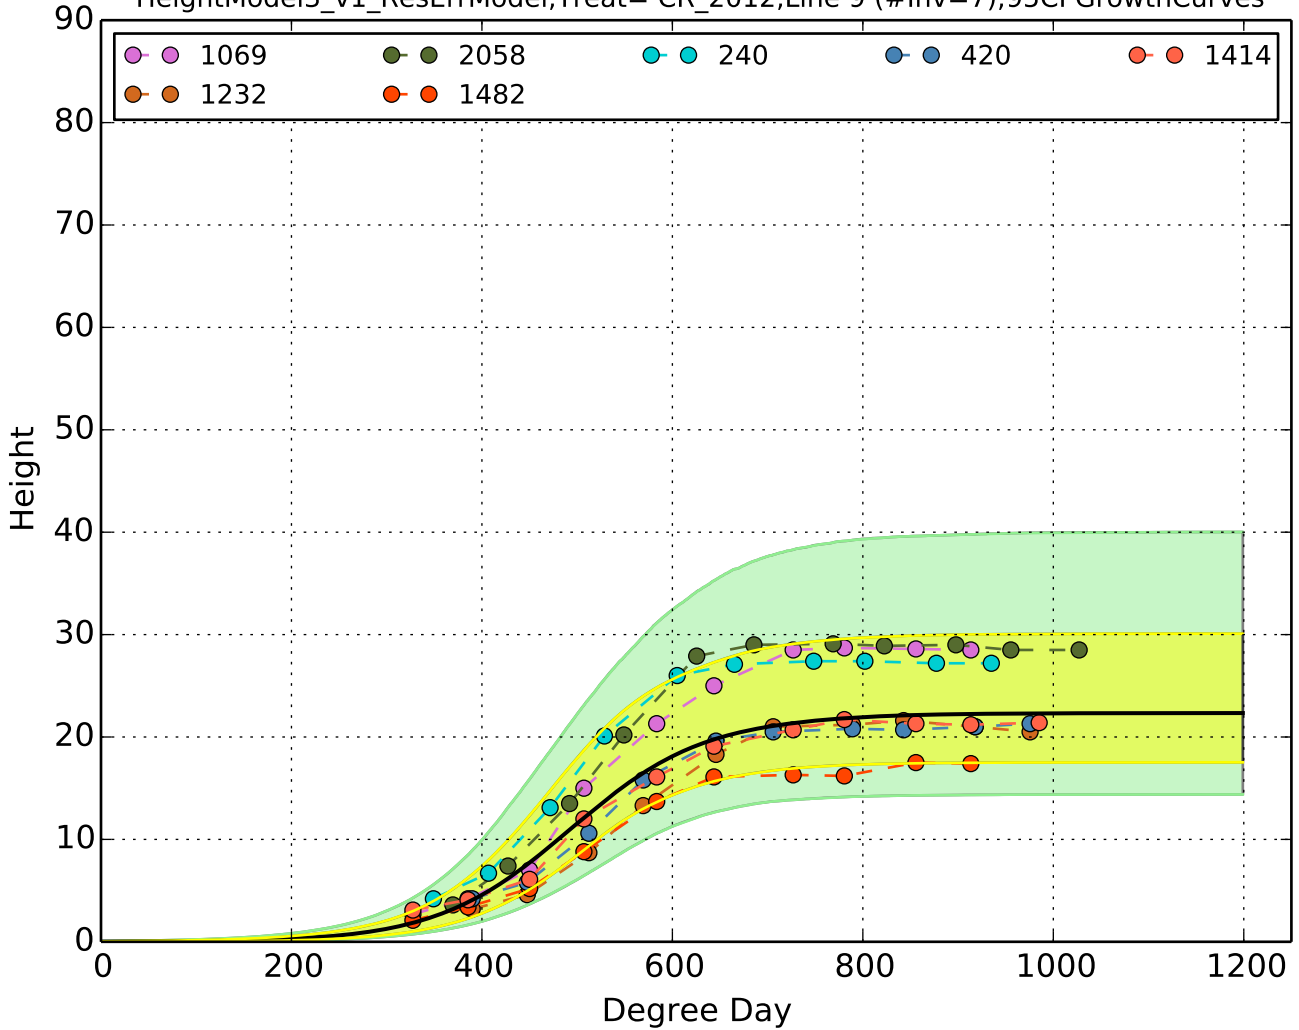

HeightModel3\_v1\_ResErrModel,Treat= CR\_2012,Line 12 (#Inv=12);95CI GrowthCurves

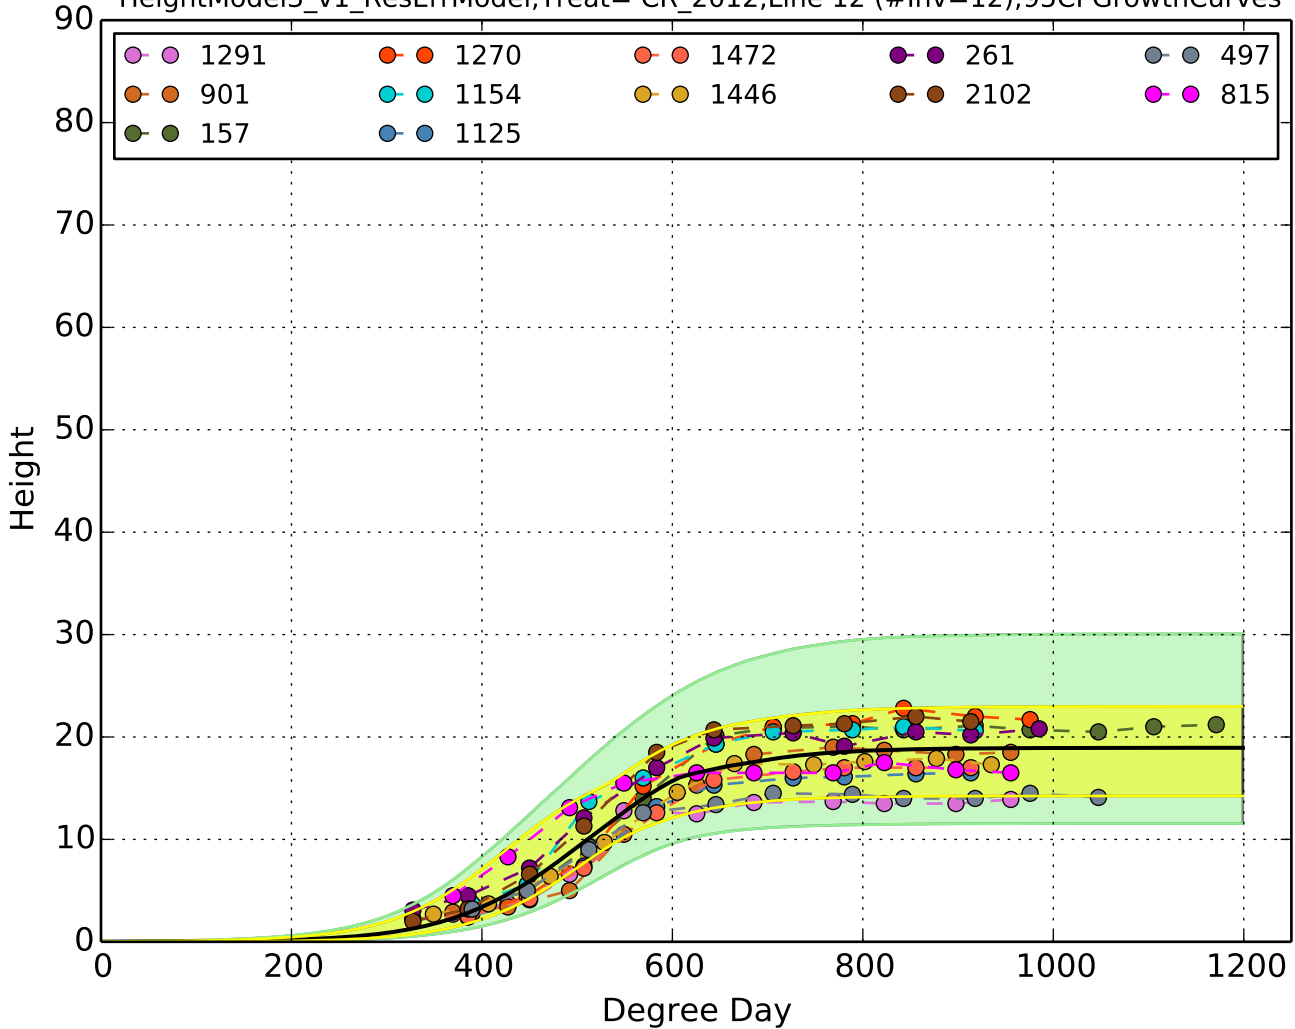

HeightModel3\_v1\_ResErrModel,Treat= CR\_2012,Line 15 (#Inv=6);95CI GrowthCurves

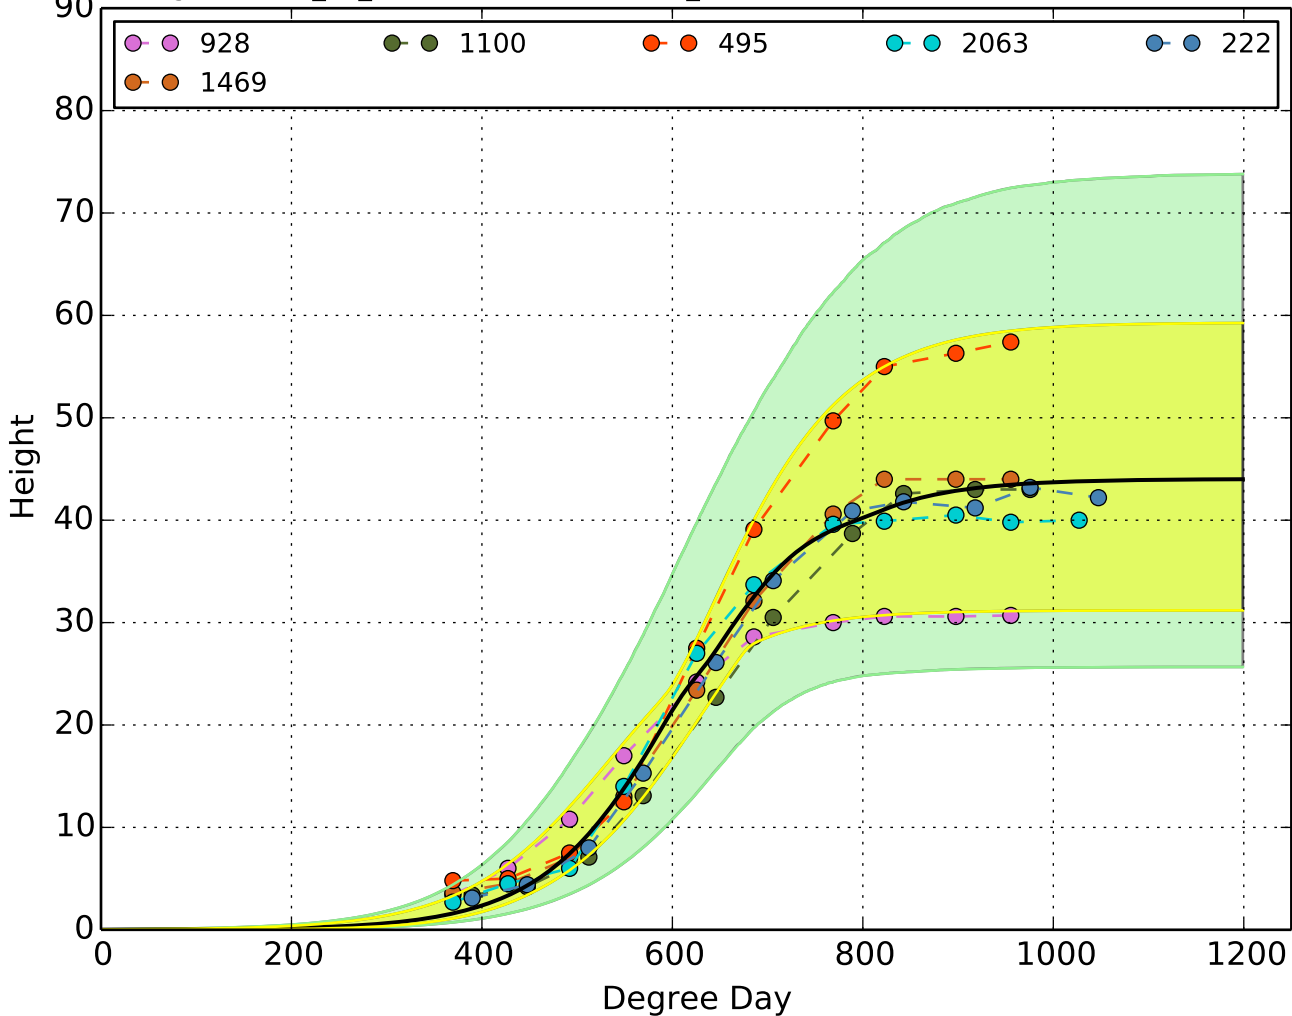



HeightModel3\_v1\_ResErrModel,Treat= CR\_2012,Line 16 (#Inv=6);95CI GrowthCurves

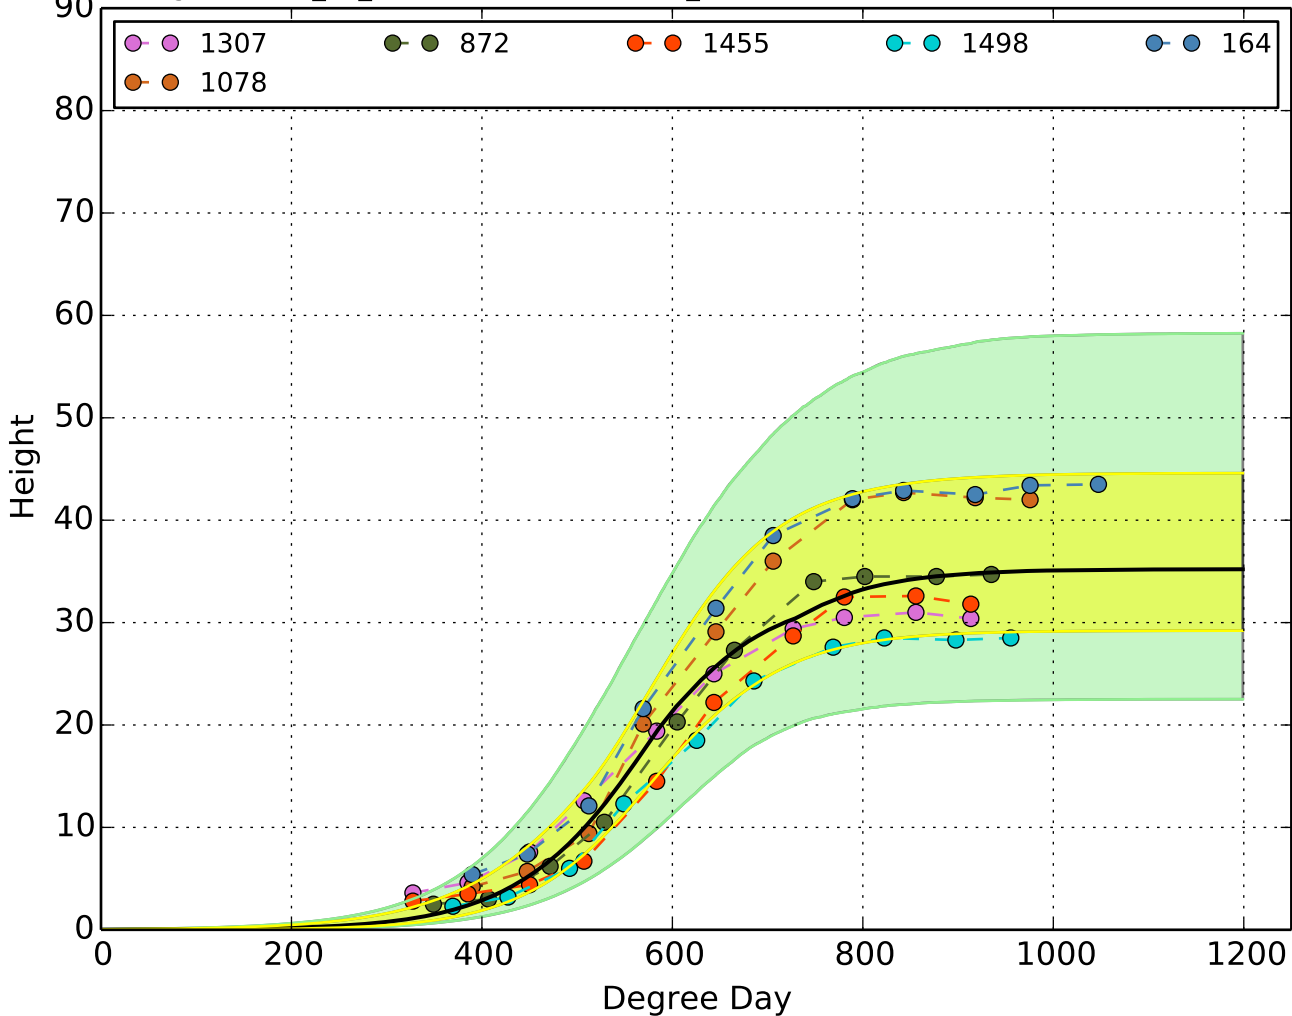

HeightModel3\_v1\_ResErrModel,Treat= CR\_2012,Line 21 (#Inv=6);95CI GrowthCurves

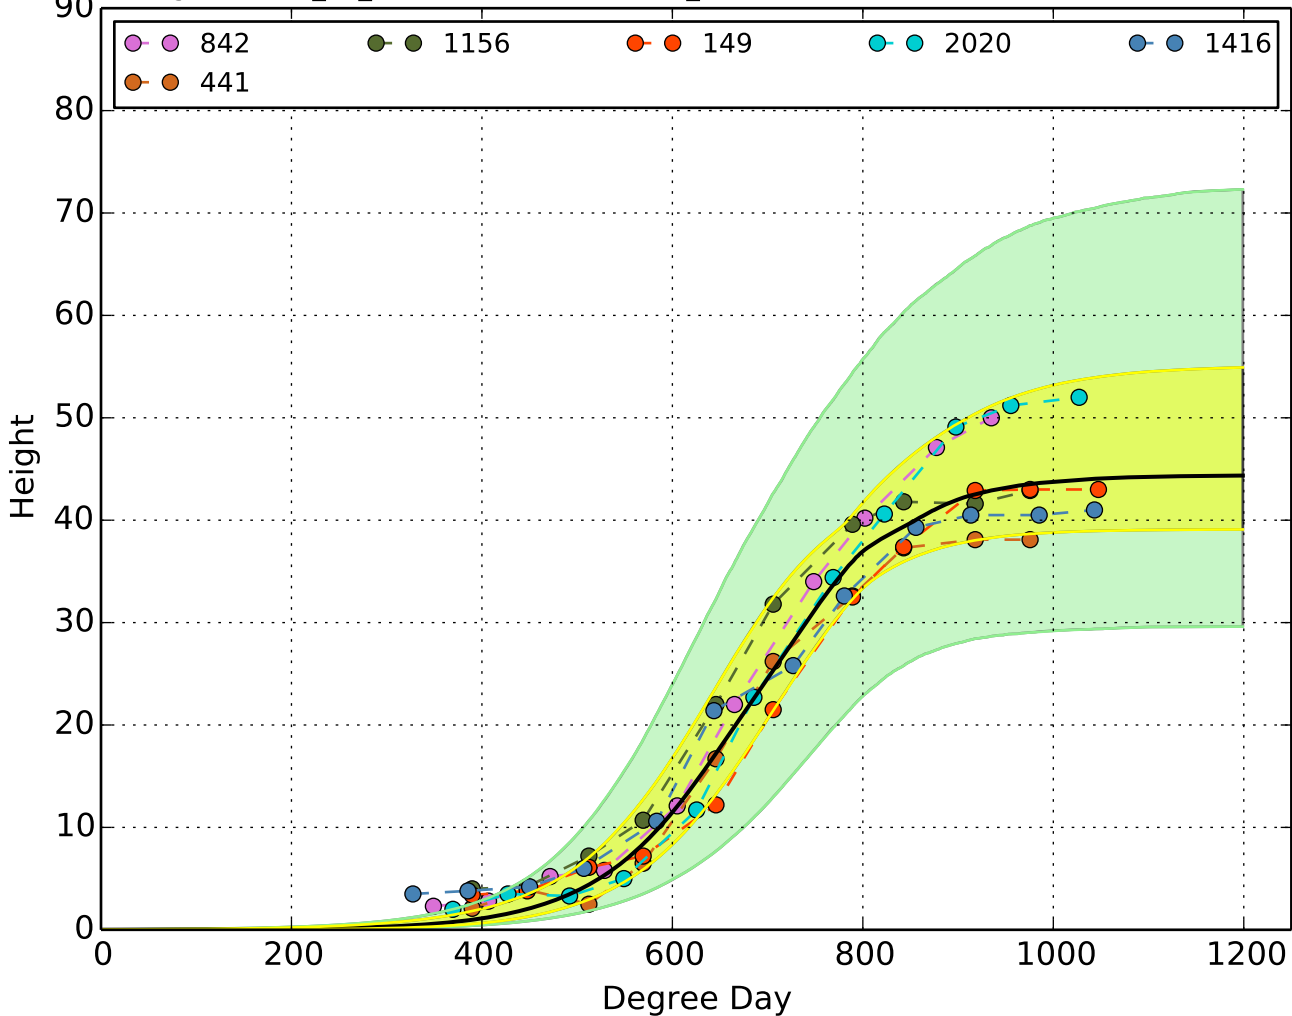

HeightModel3\_v1\_ResErrModel,Treat= CR\_2012,Line 23 (#Inv=4);95CI GrowthCurves

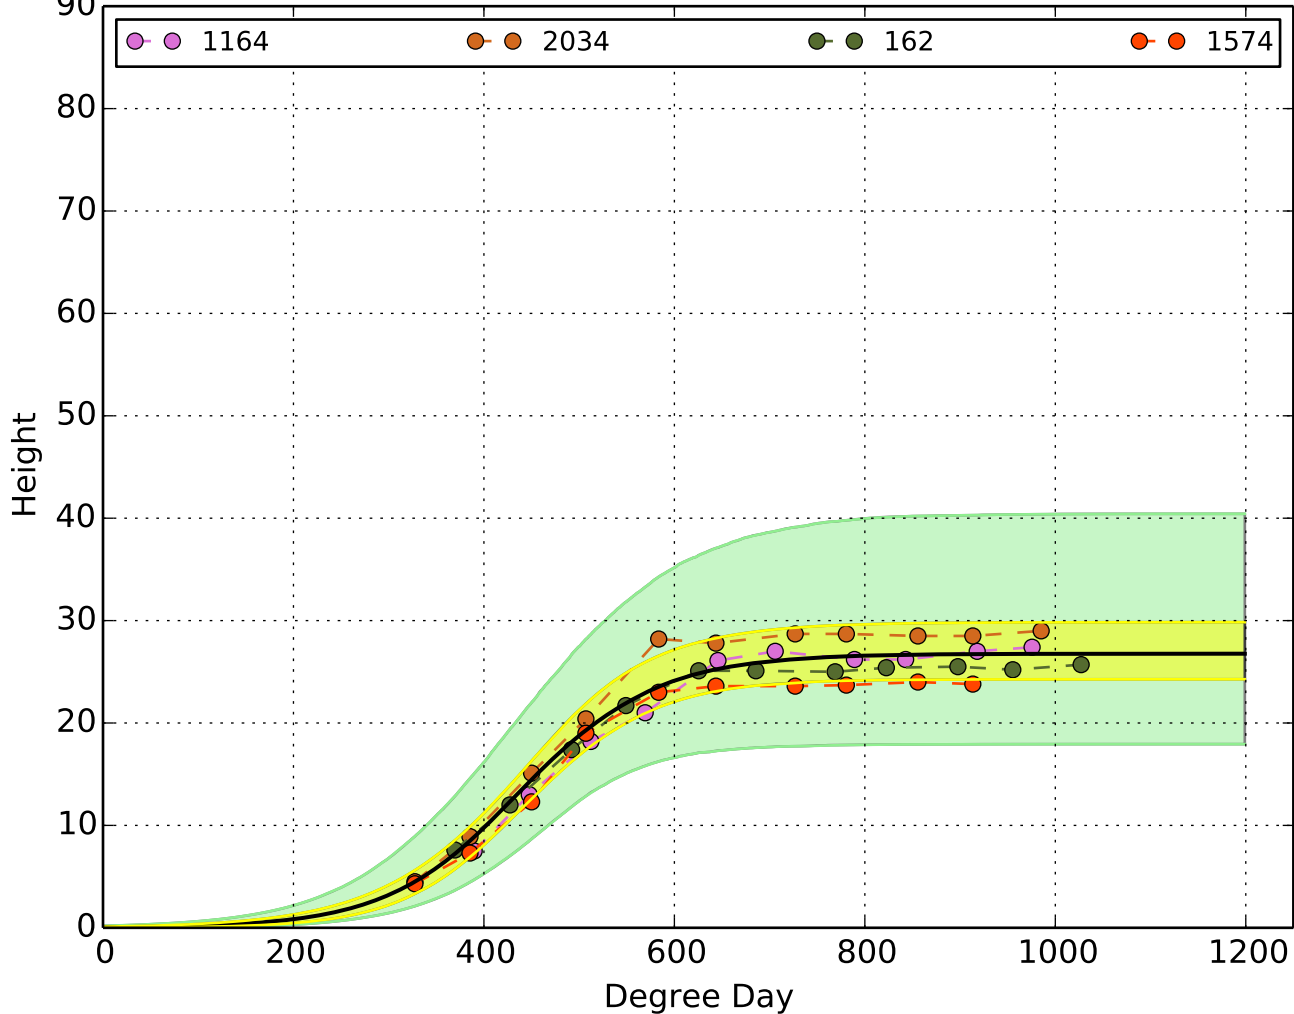

HeightModel3\_v1\_ResErrModel,Treat= CR\_2012,Line 25 (#Inv=6);95CI GrowthCurves

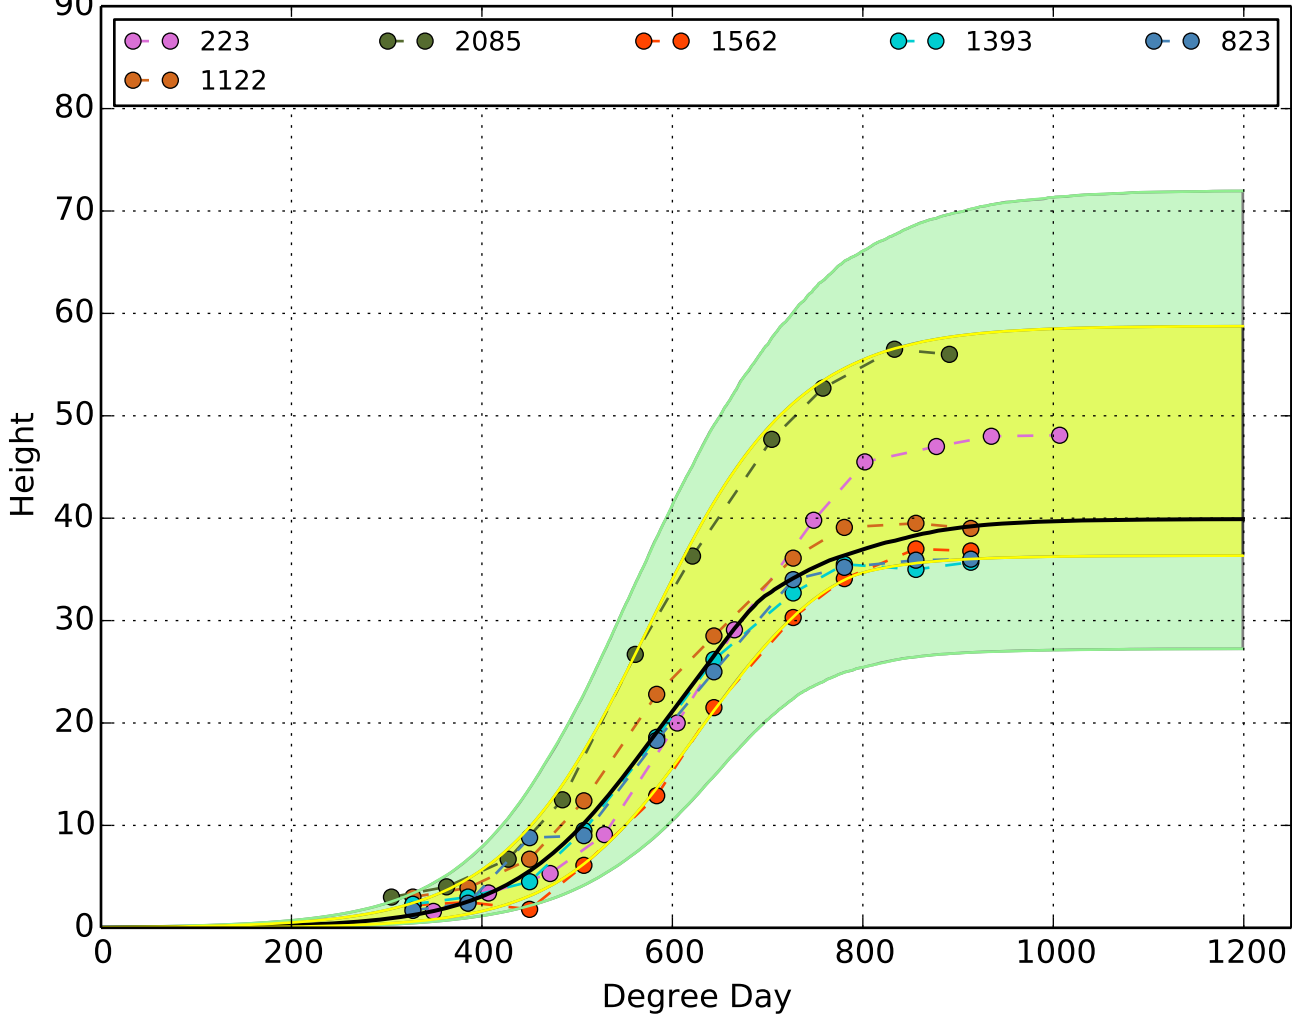

HeightModel3\_v1\_ResErrModel,Treat= CR\_2012,Line 30 (#Inv=8);95CI GrowthCurves

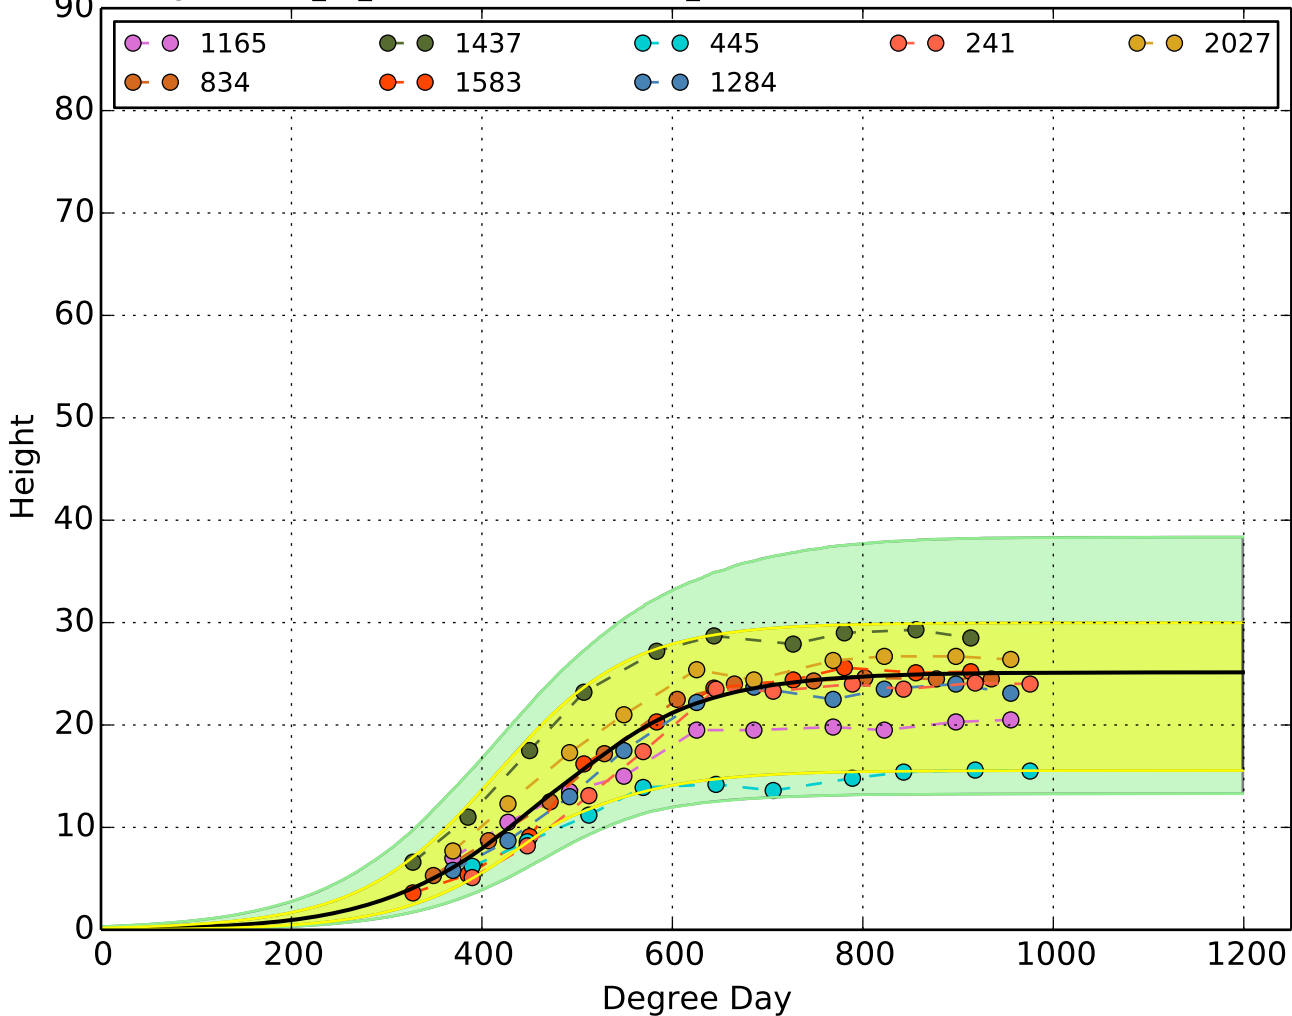

HeightModel3\_v1\_ResErrModel,Treat= CR\_2012,Line 31 (#Inv=6);95CI GrowthCurves

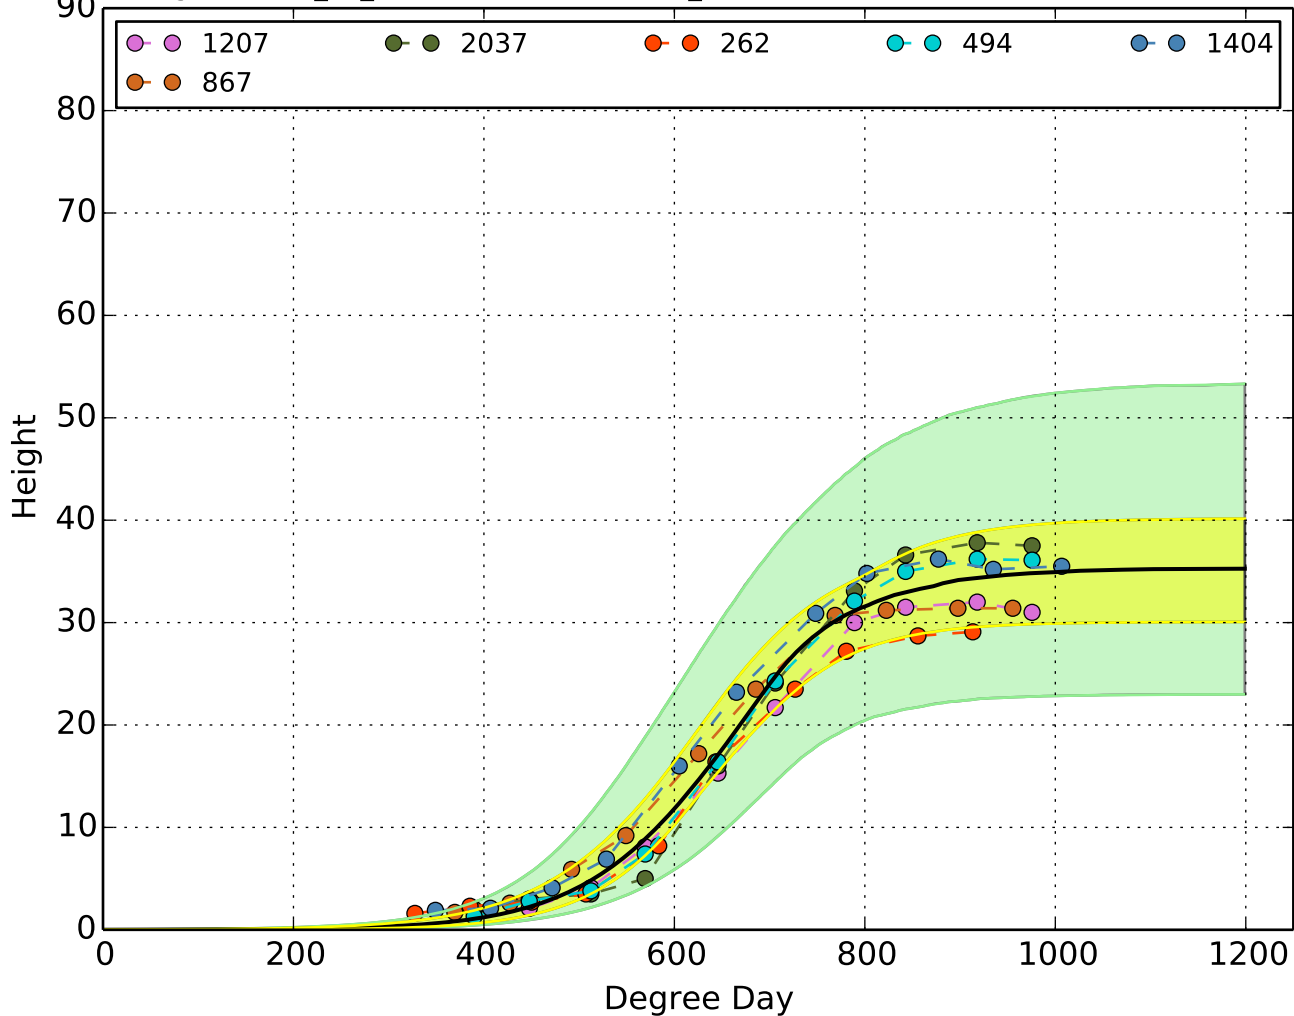

HeightModel3\_v1\_ResErrModel,Treat= CR\_2012,Line 36 (#Inv=13);95CI GrowthCurves

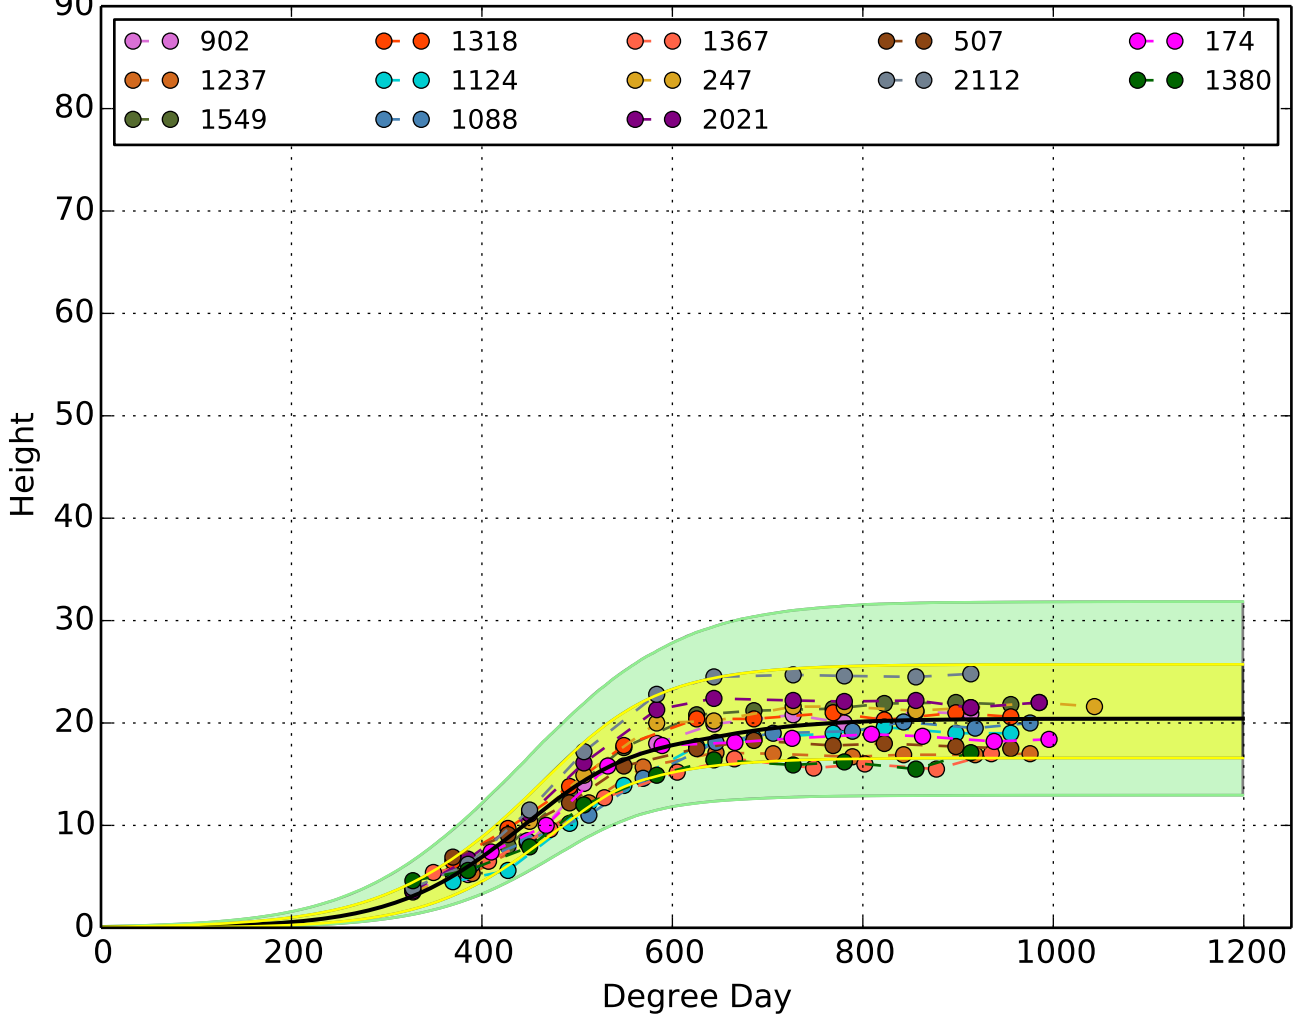

HeightModel3\_v1\_ResErrModel,Treat= CR\_2012,Line 39 (#Inv=4);95CI GrowthCurves

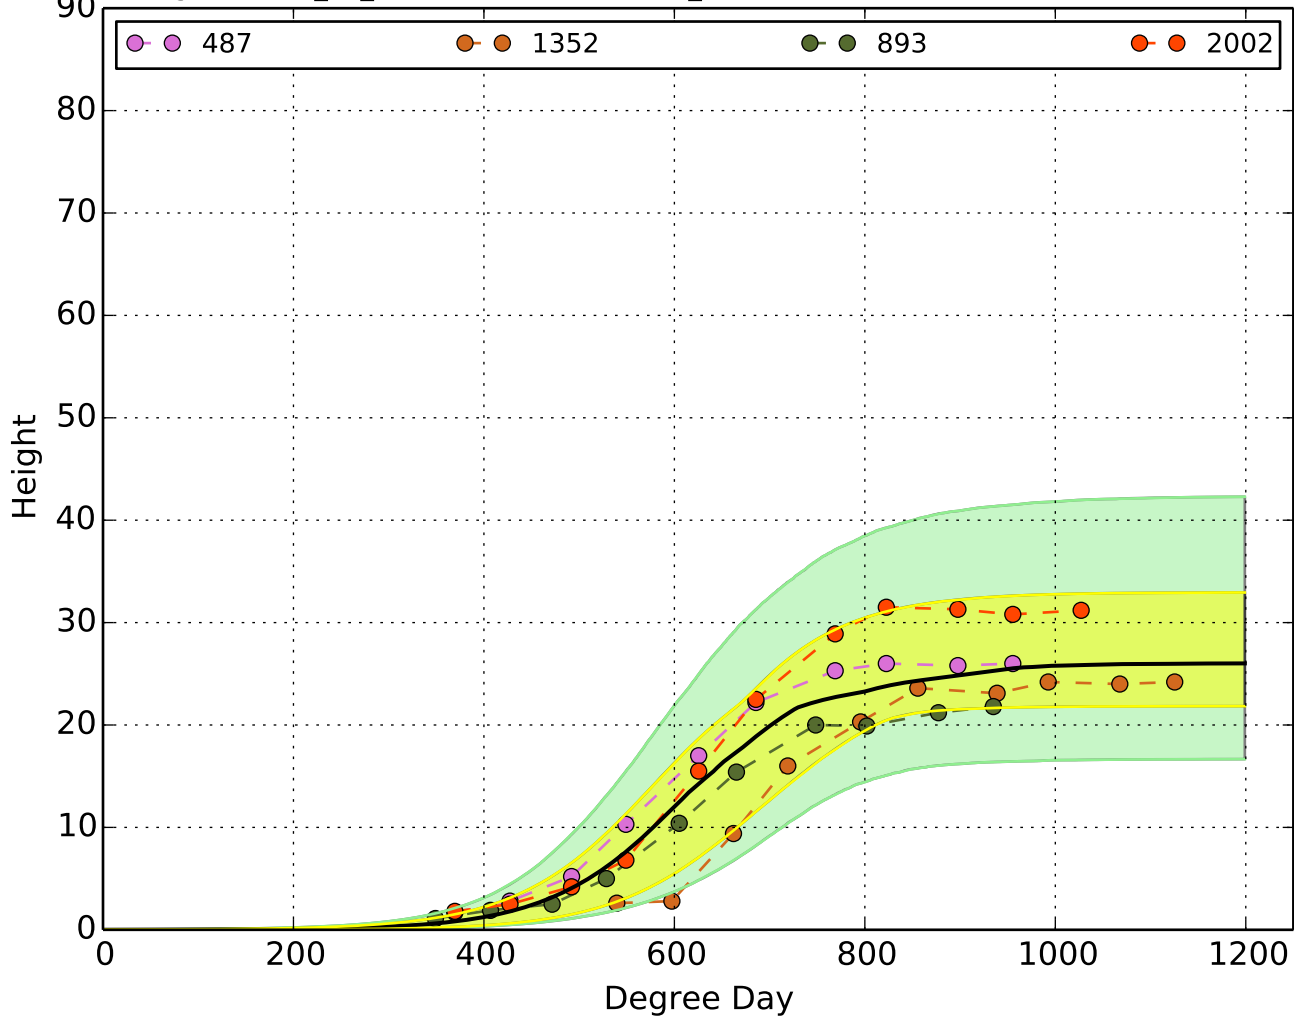



HeightModel3\_v1\_ResErrModel,Treat= CR\_2012,Line 42 (#Inv=7);95CI GrowthCurves

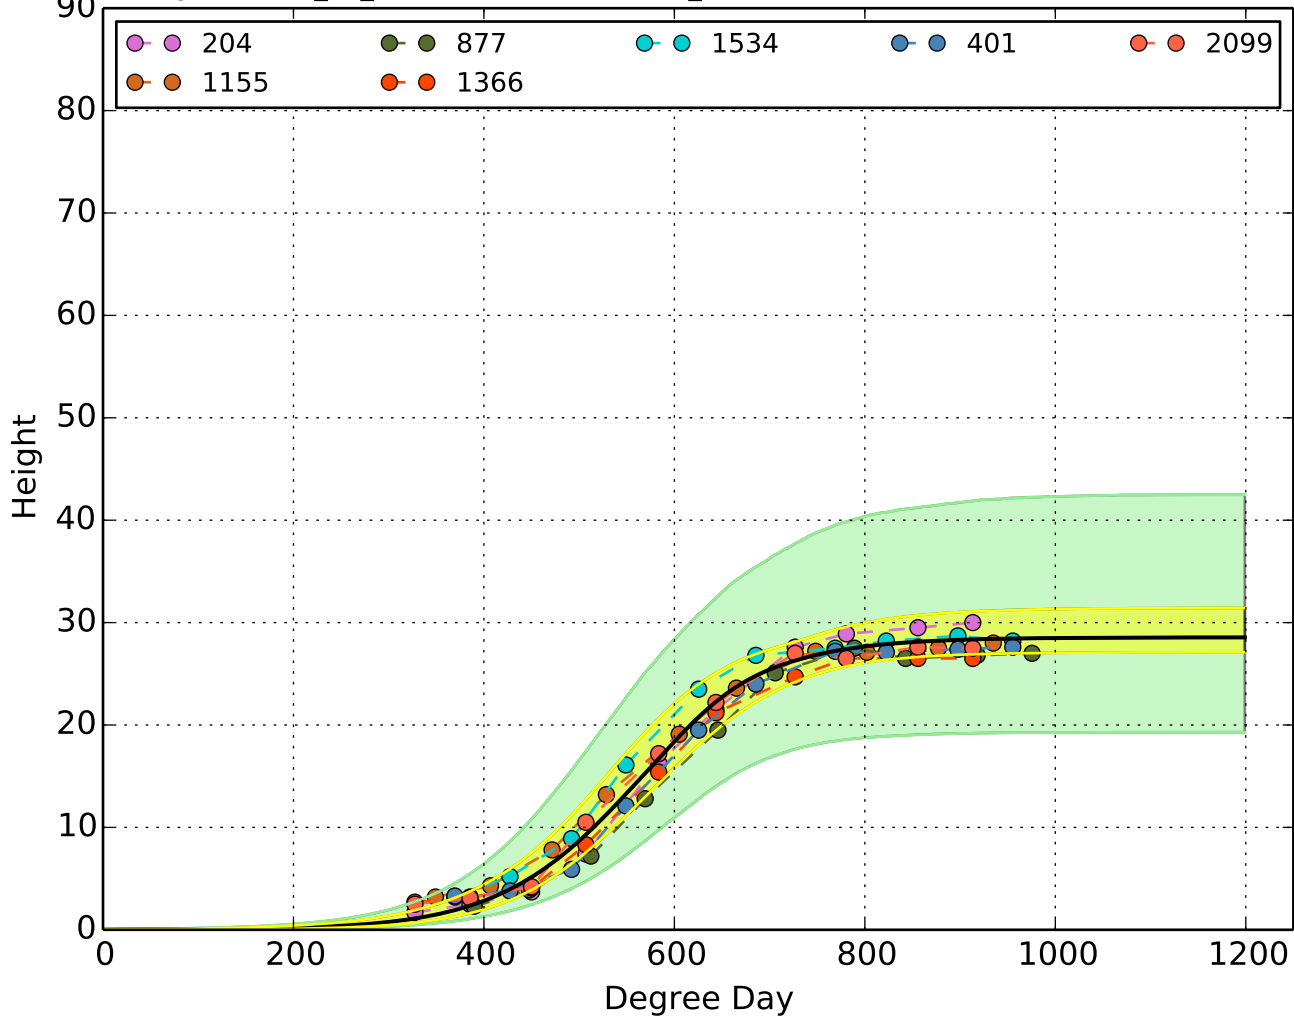

HeightModel3\_v1\_ResErrModel,Treat= CR\_2012,Line 46 (#Inv=5);95CI GrowthCurves

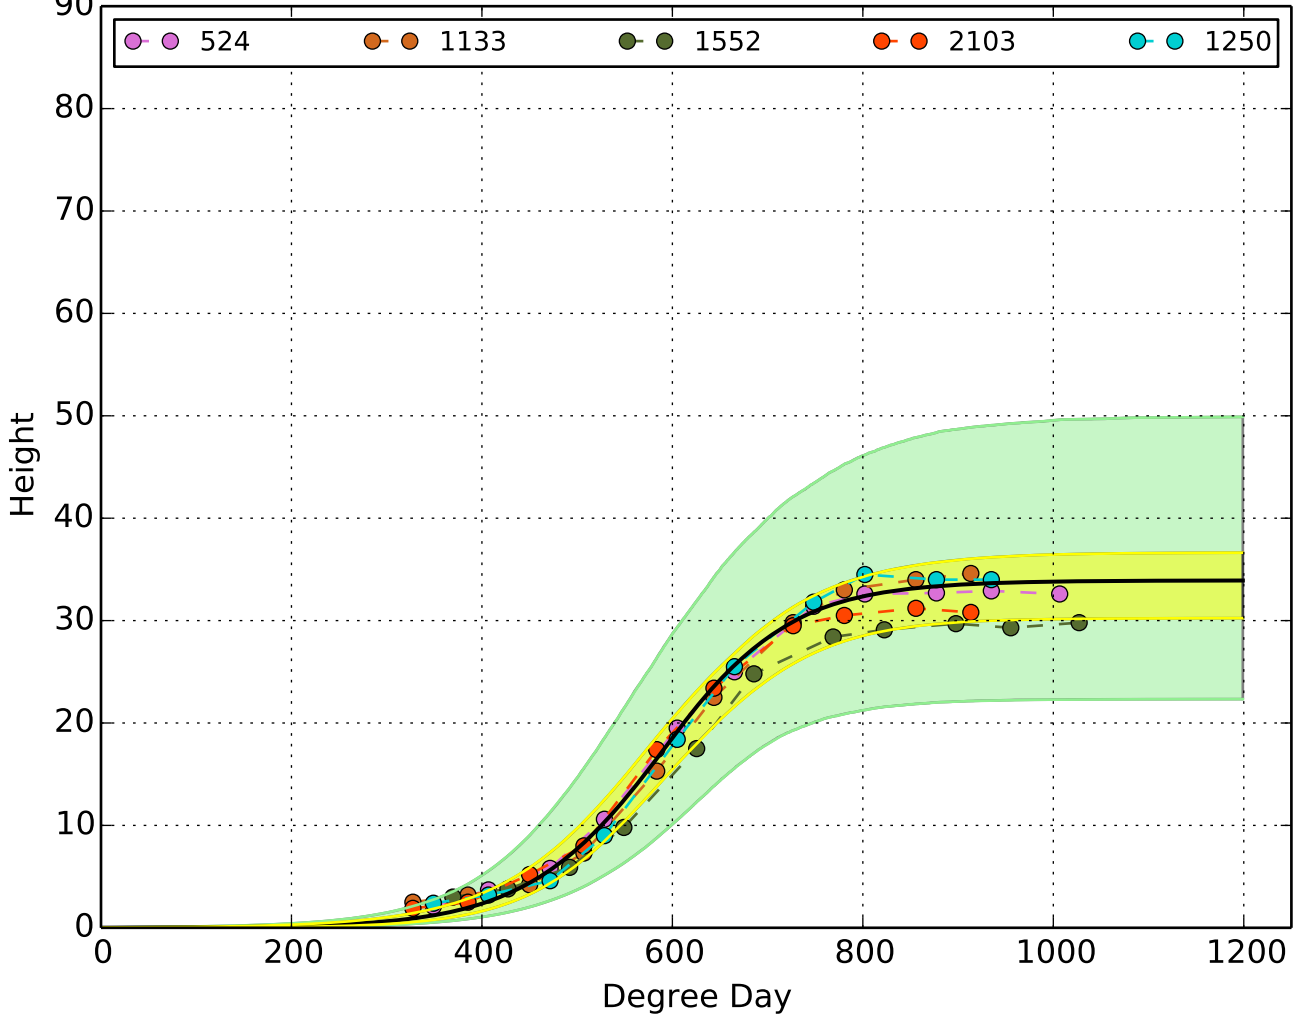

HeightModel3\_v1\_ResErrModel,Treat= CR\_2012,Line 53 (#Inv=13);95CI GrowthCurves

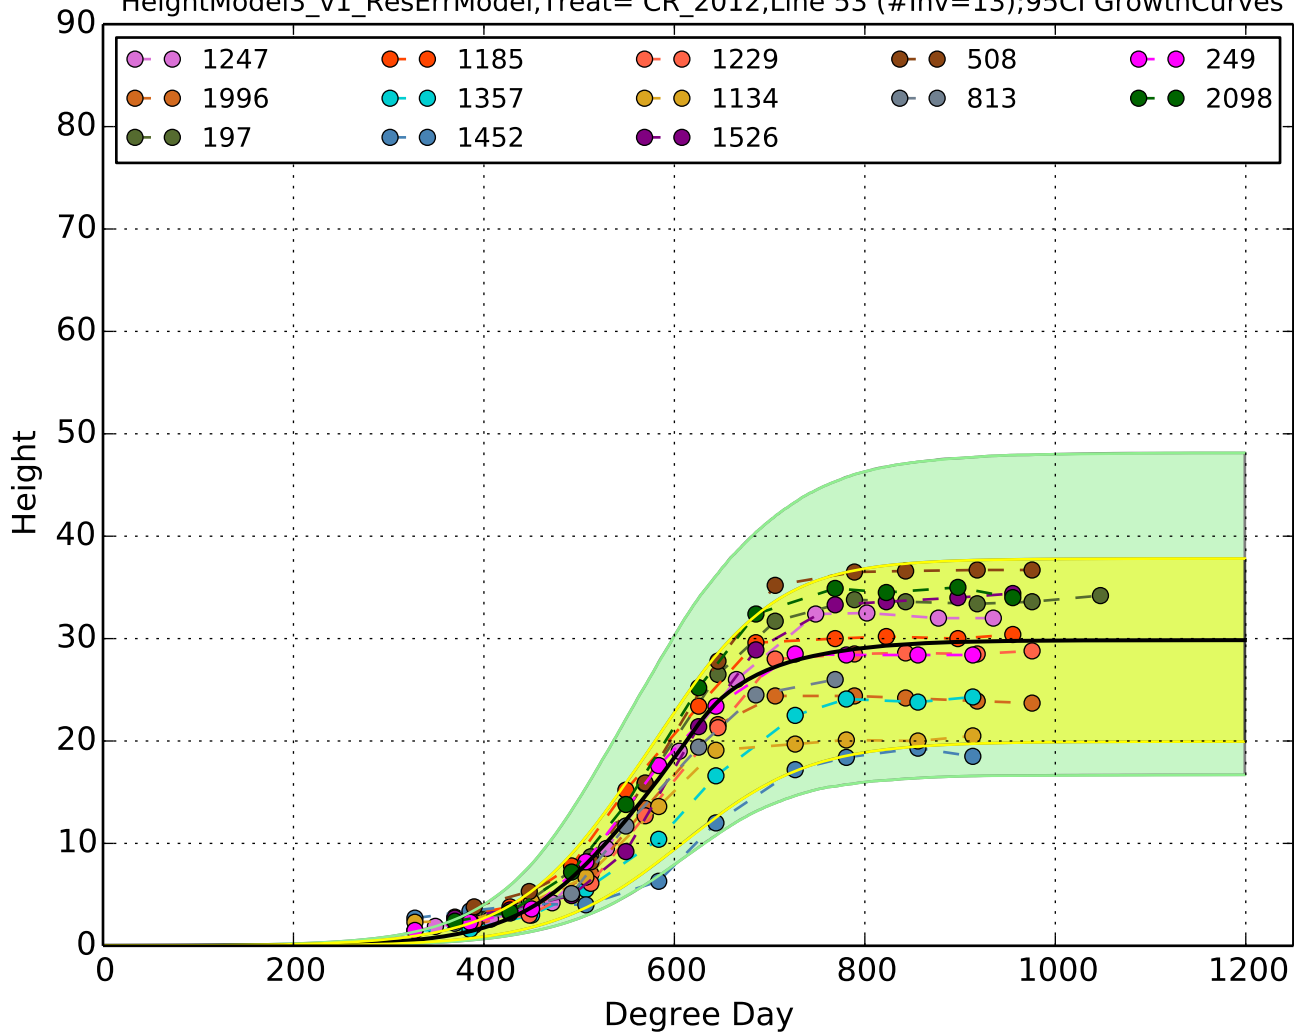

HeightModel3\_v1\_ResErrModel,Treat= CR\_2012,Line 60 (#Inv=7);95CI GrowthCurves

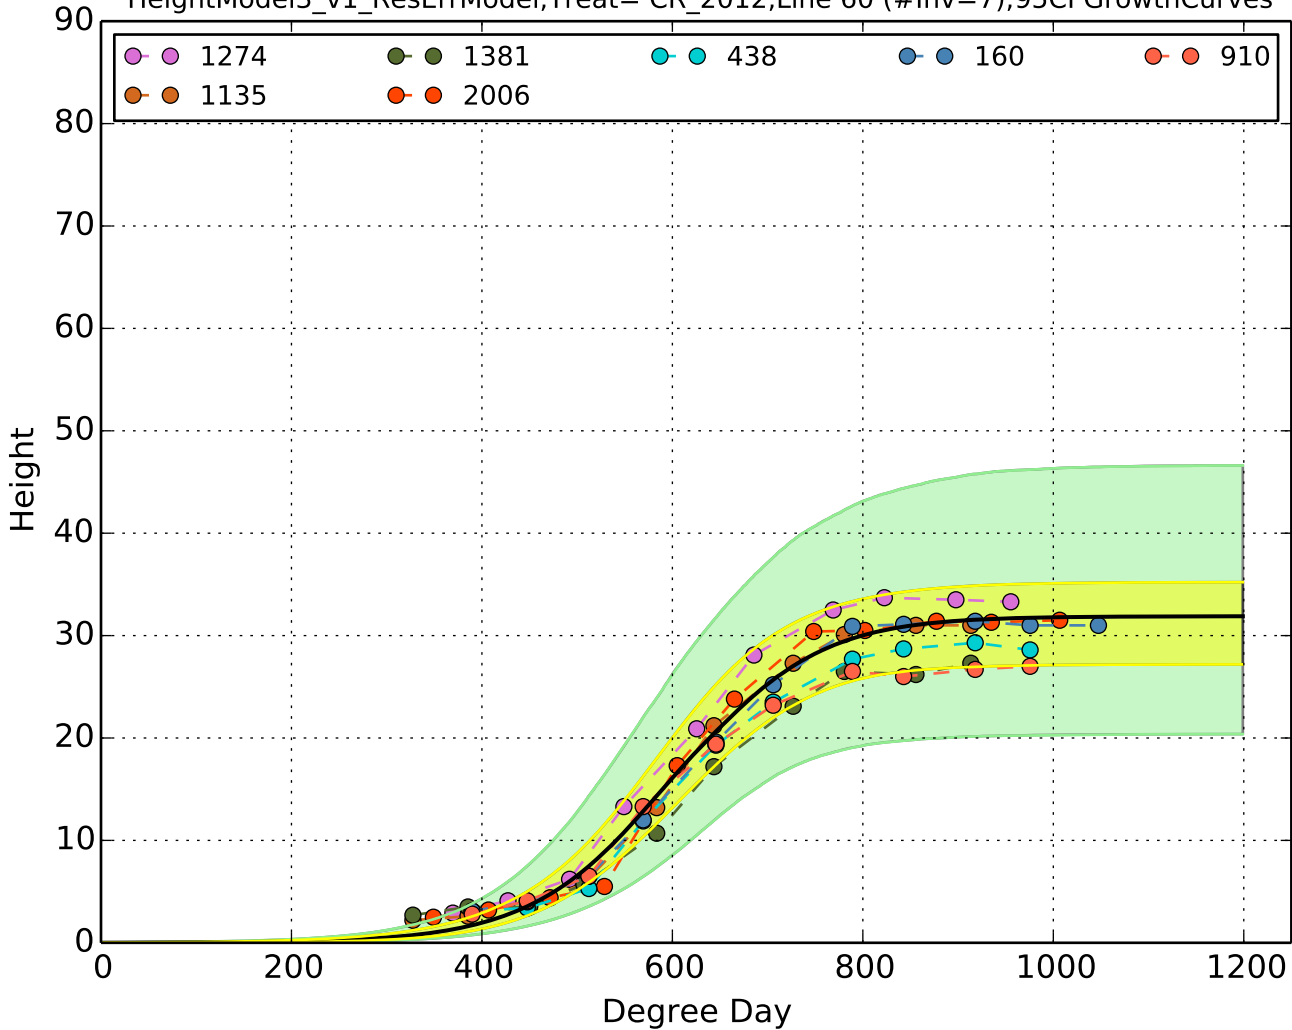

HeightModel3\_v1\_ResErrModel,Treat= CR\_2012,Line 63 (#Inv=8);95CI GrowthCurves

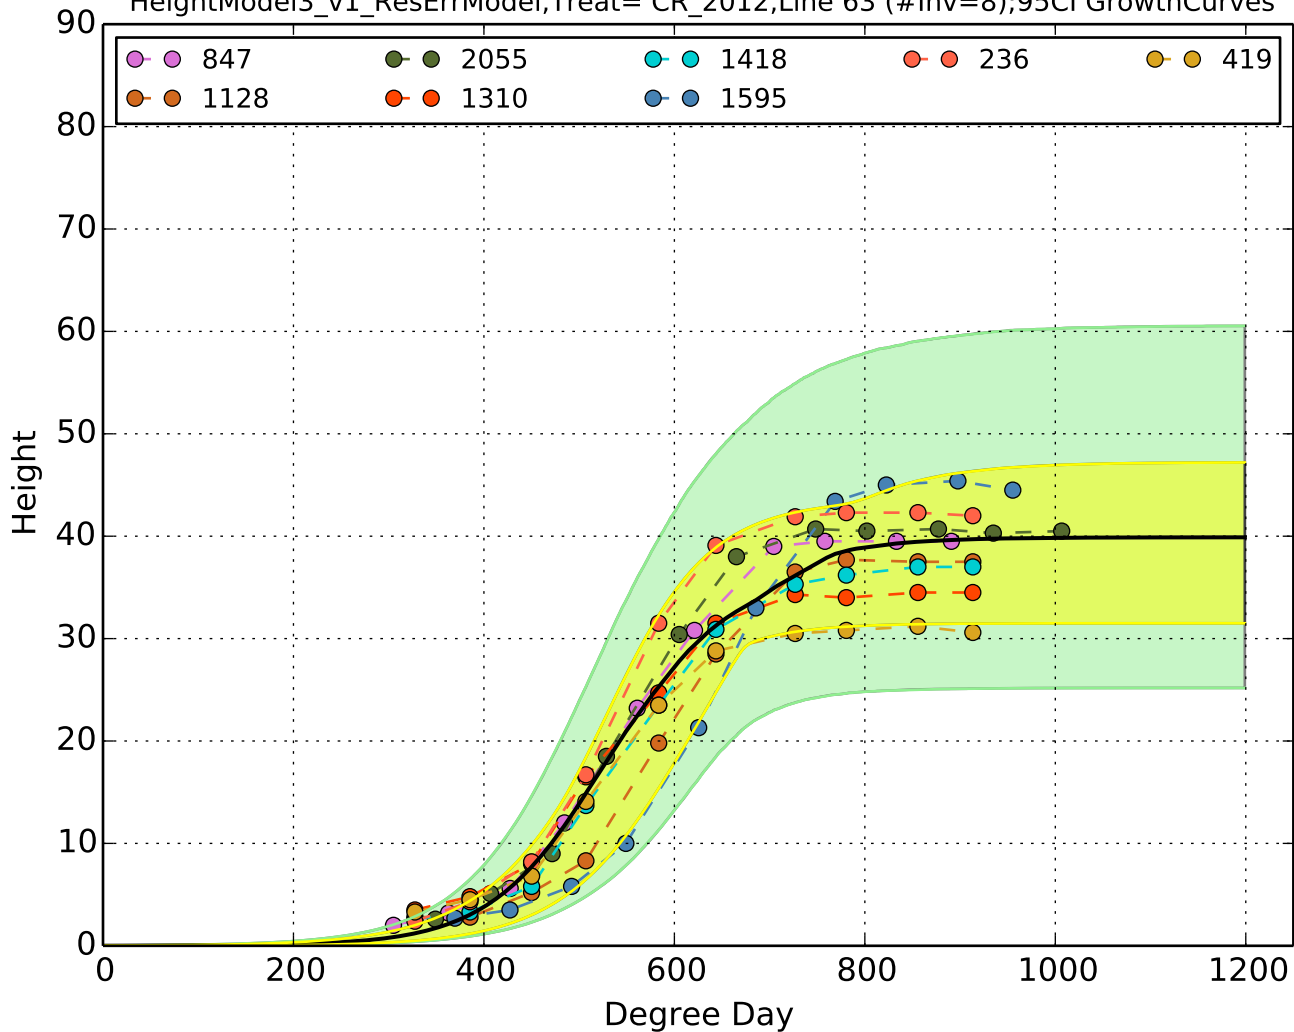

HeightModel3\_v1\_ResErrModel,Treat= CR\_2012,Line 65 (#Inv=5);95CI GrowthCurves

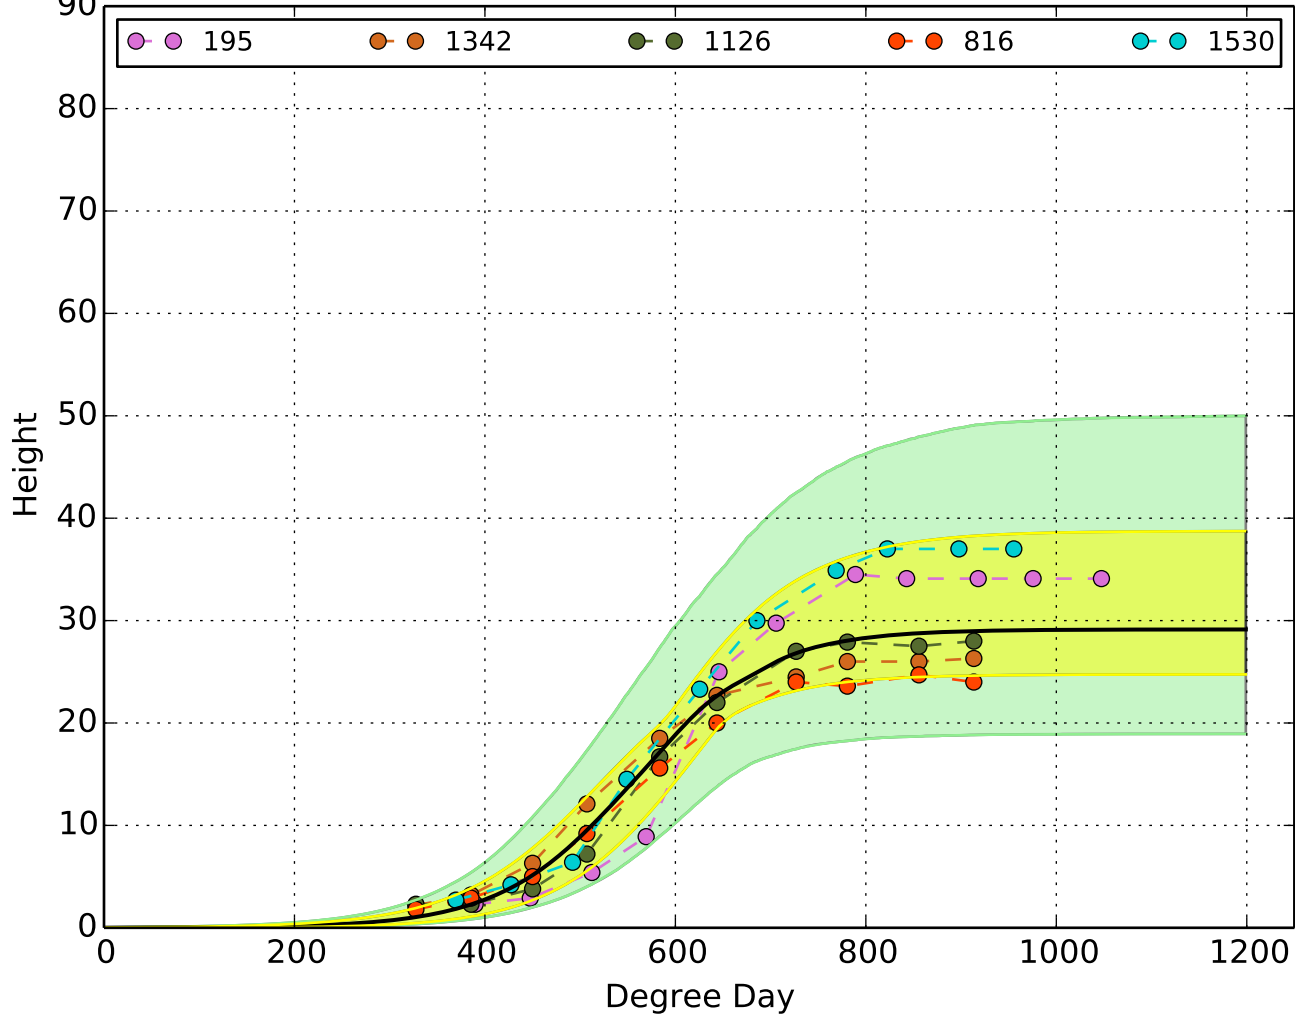

HeightModel3\_v1\_ResErrModel,Treat= CR\_2012,Line 66 (#Inv=7);95CI GrowthCurves

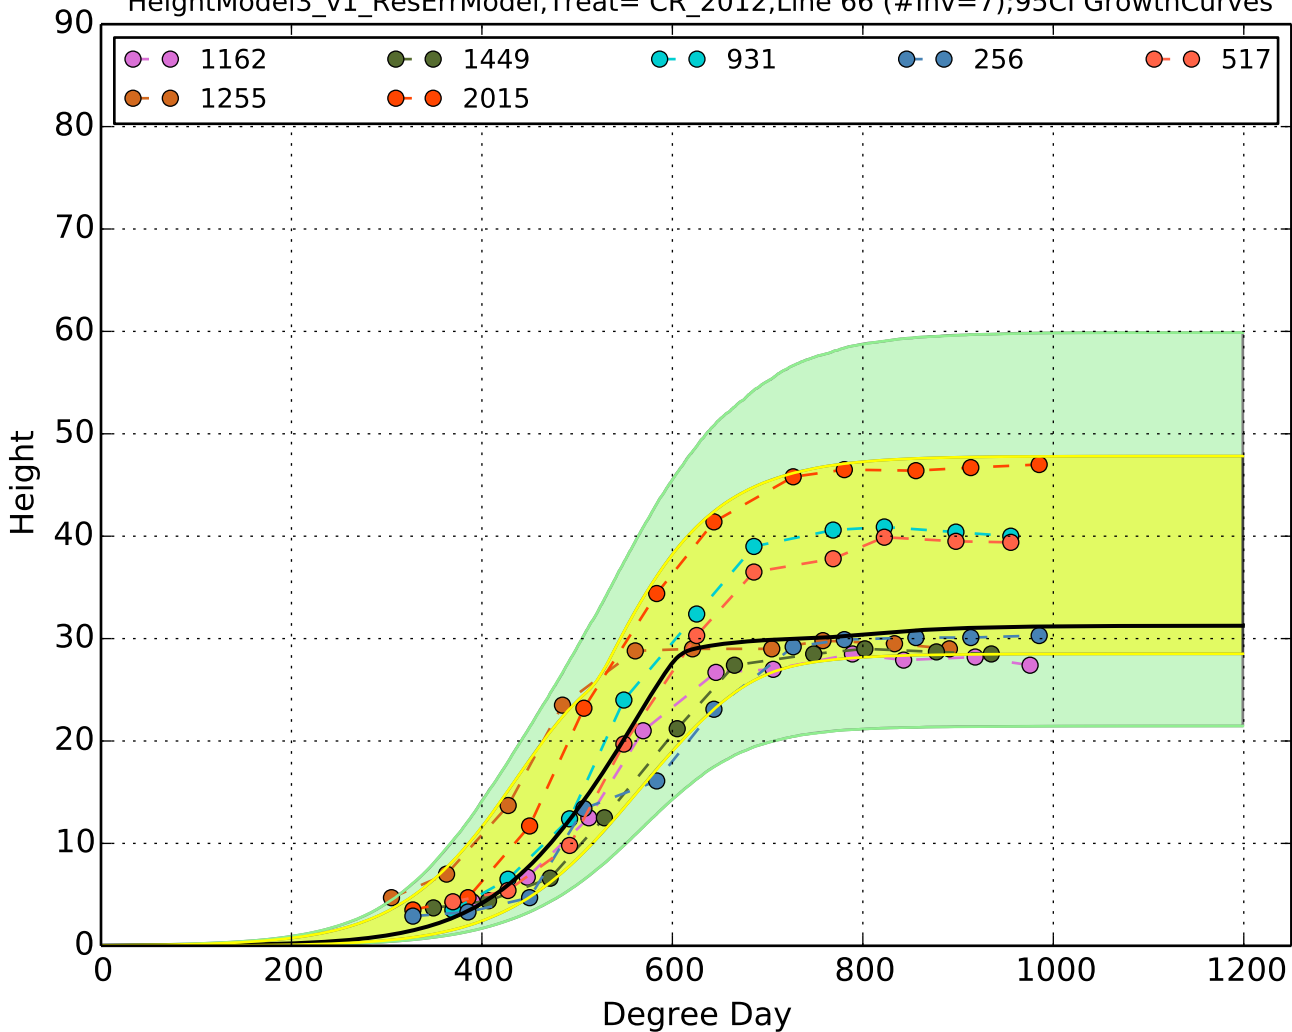

HeightModel3\_v1\_ResErrModel,Treat= CR\_2012,Line 69 (#Inv=6);95CI GrowthCurves

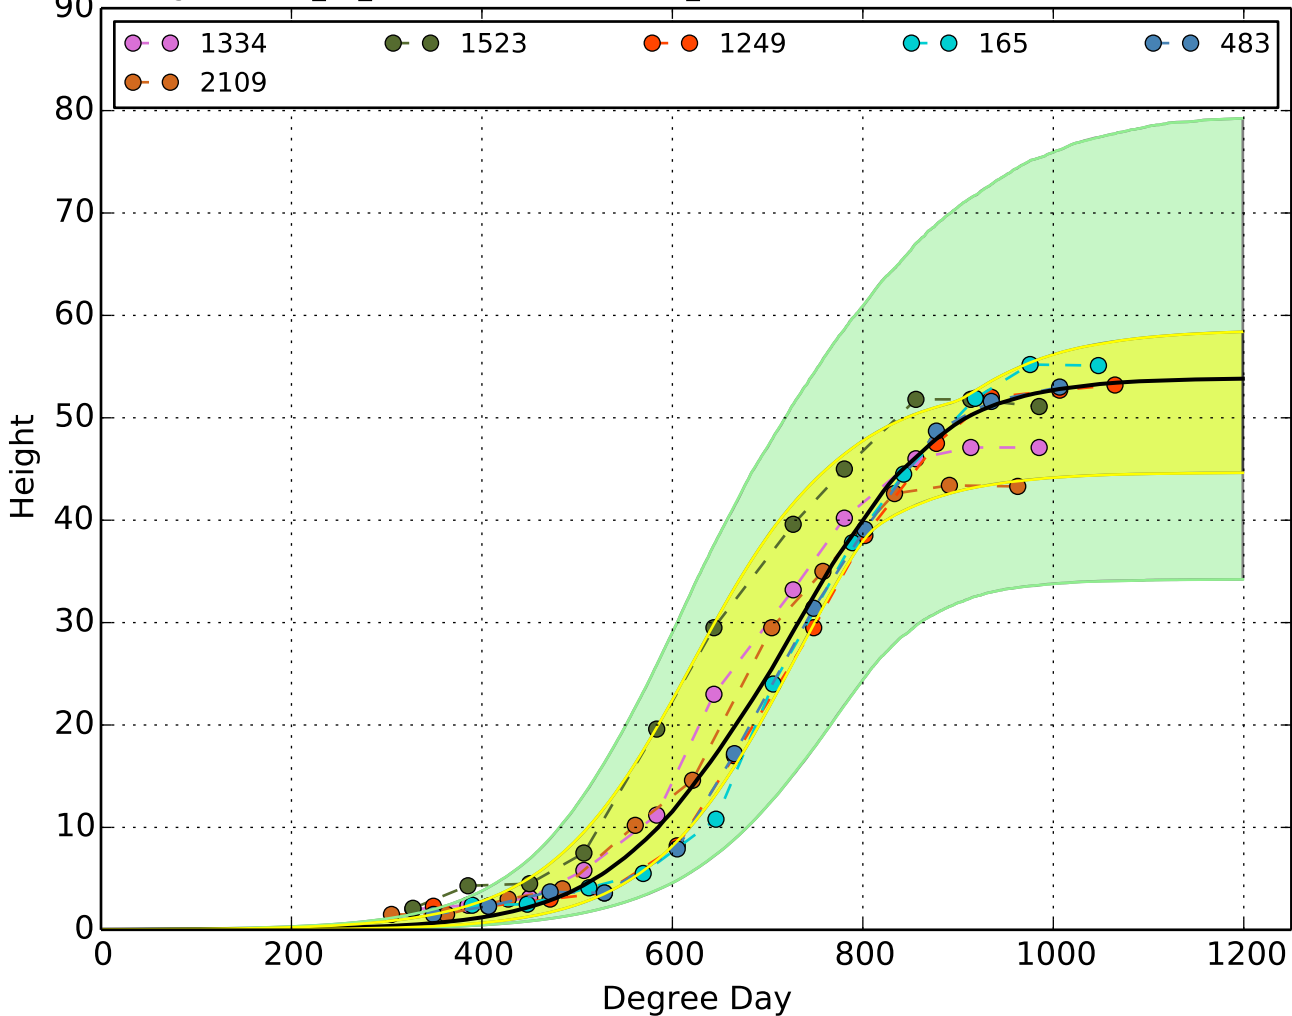



HeightModel3\_v1\_ResErrModel,Treat= CR\_2012,Line 70 (#Inv=7);95CI GrowthCurves

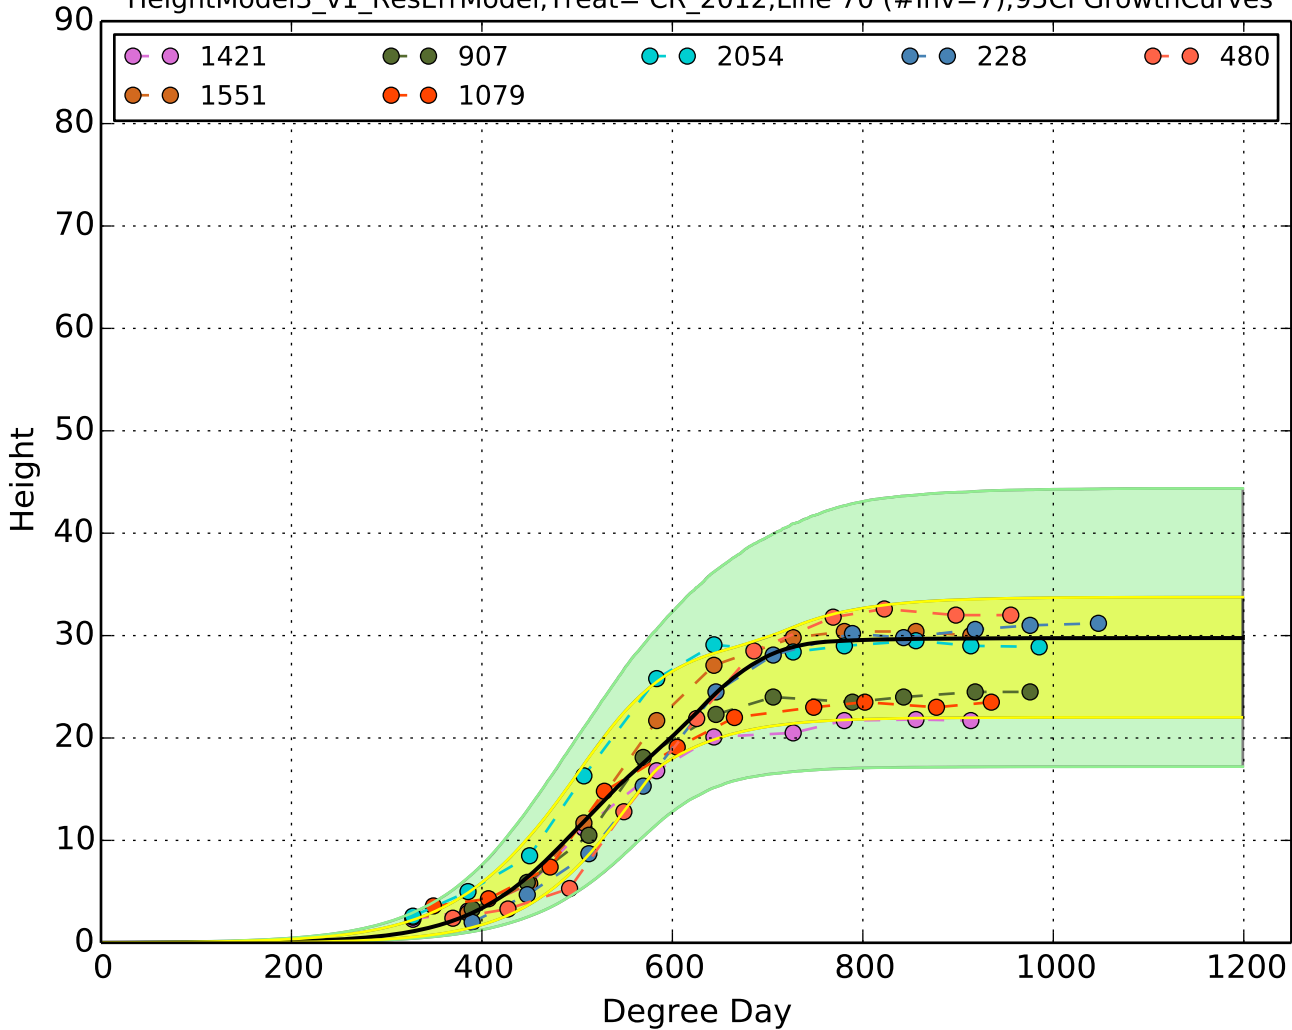

HeightModel3\_v1\_ResErrModel,Treat= CR\_2012,Line 73 (#Inv=8);95CI GrowthCurves

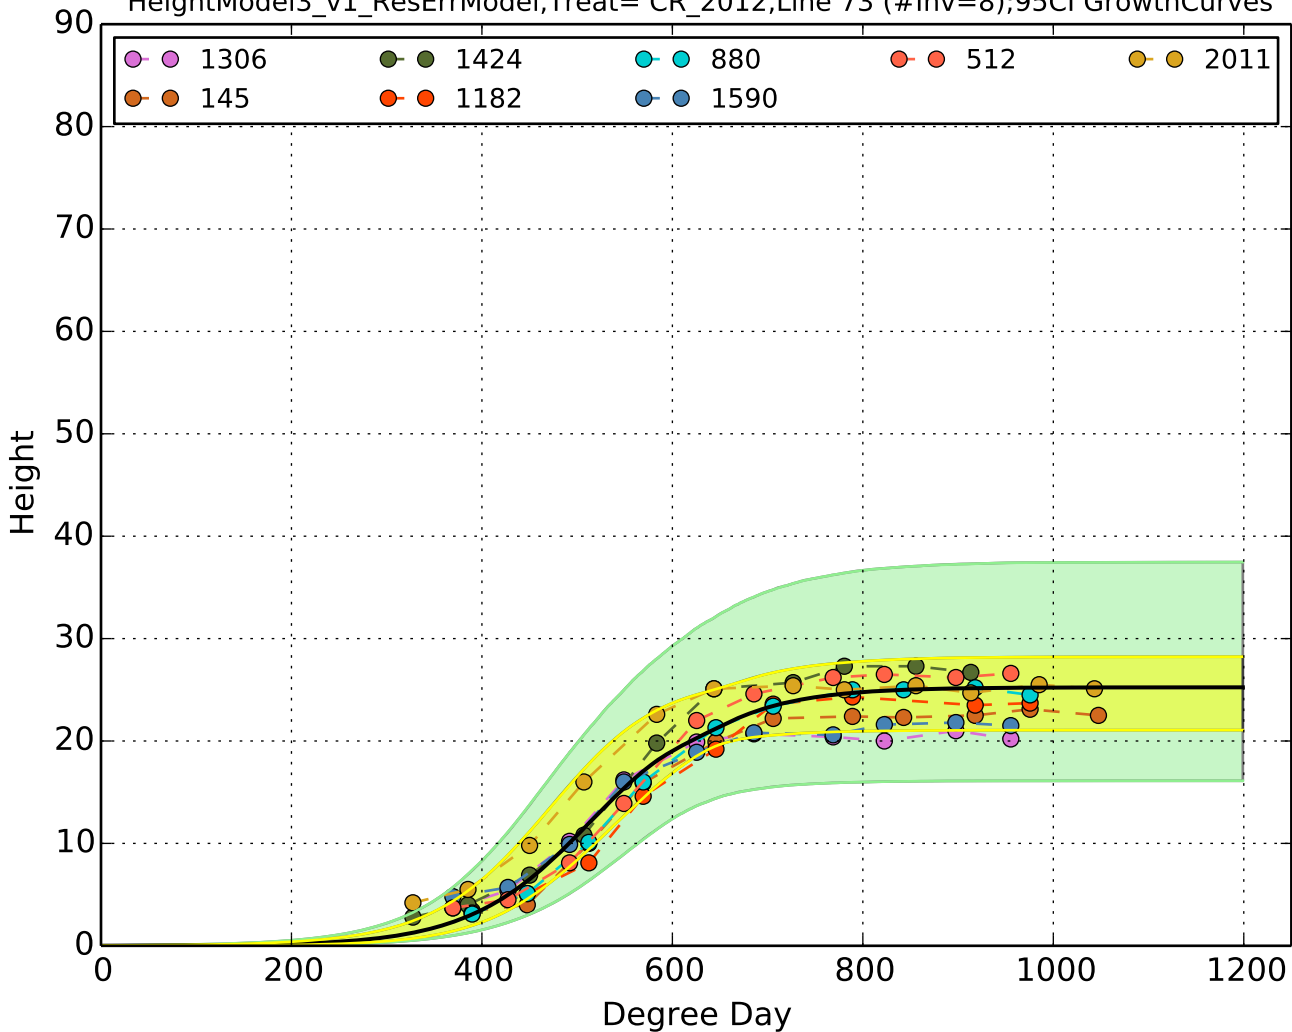

HeightModel3\_v1\_ResErrModel,Treat= CR\_2012,Line 76 (#Inv=7);95CI GrowthCurves

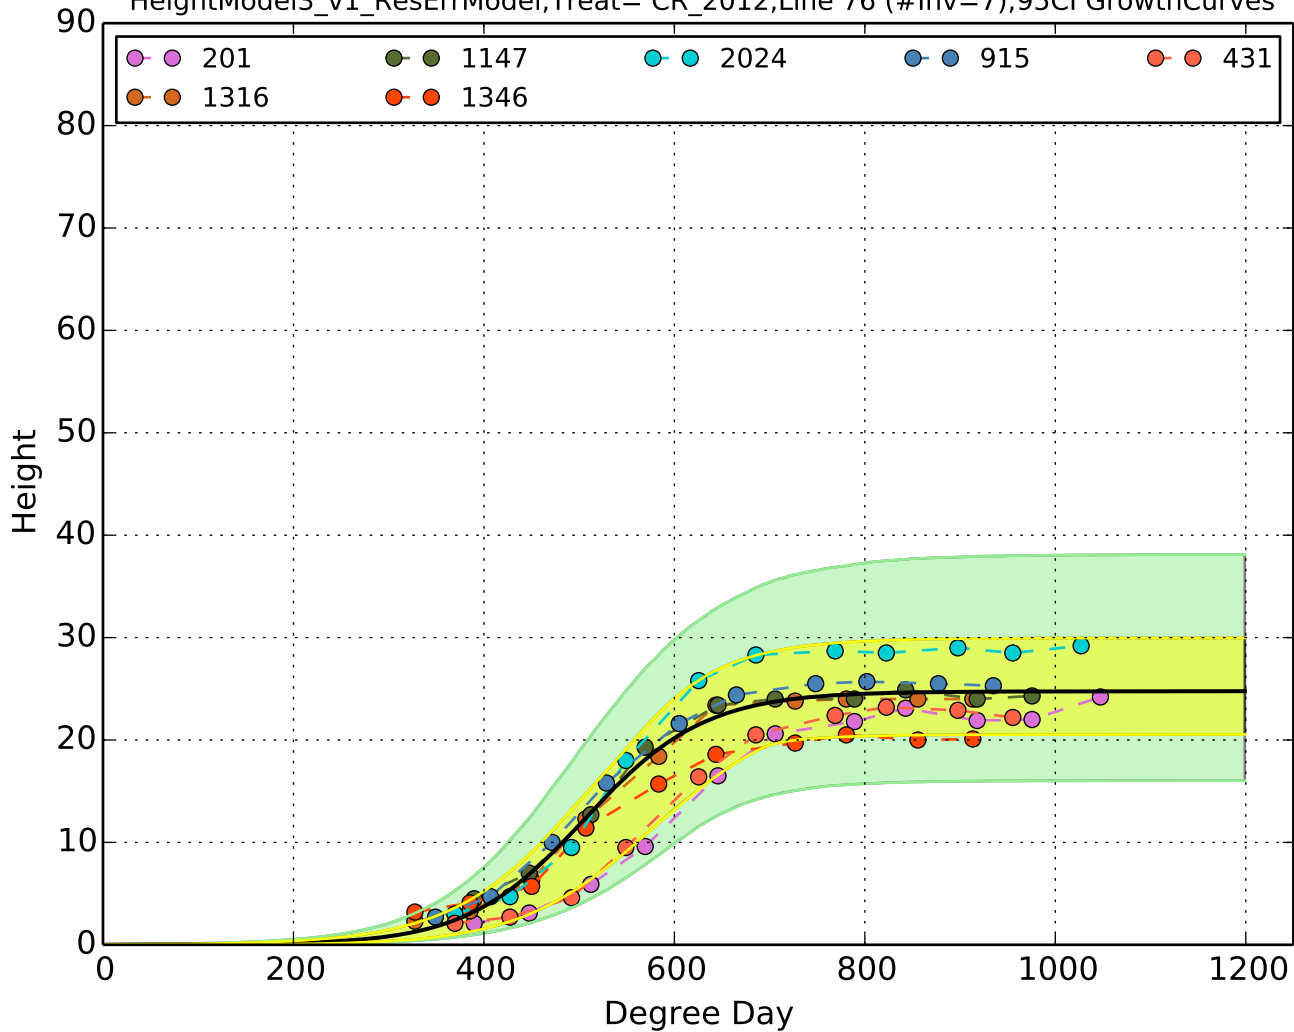

HeightModel3\_v1\_ResErrModel,Treat= CR\_2012,Line 80 (#Inv=5);95CI GrowthCurves

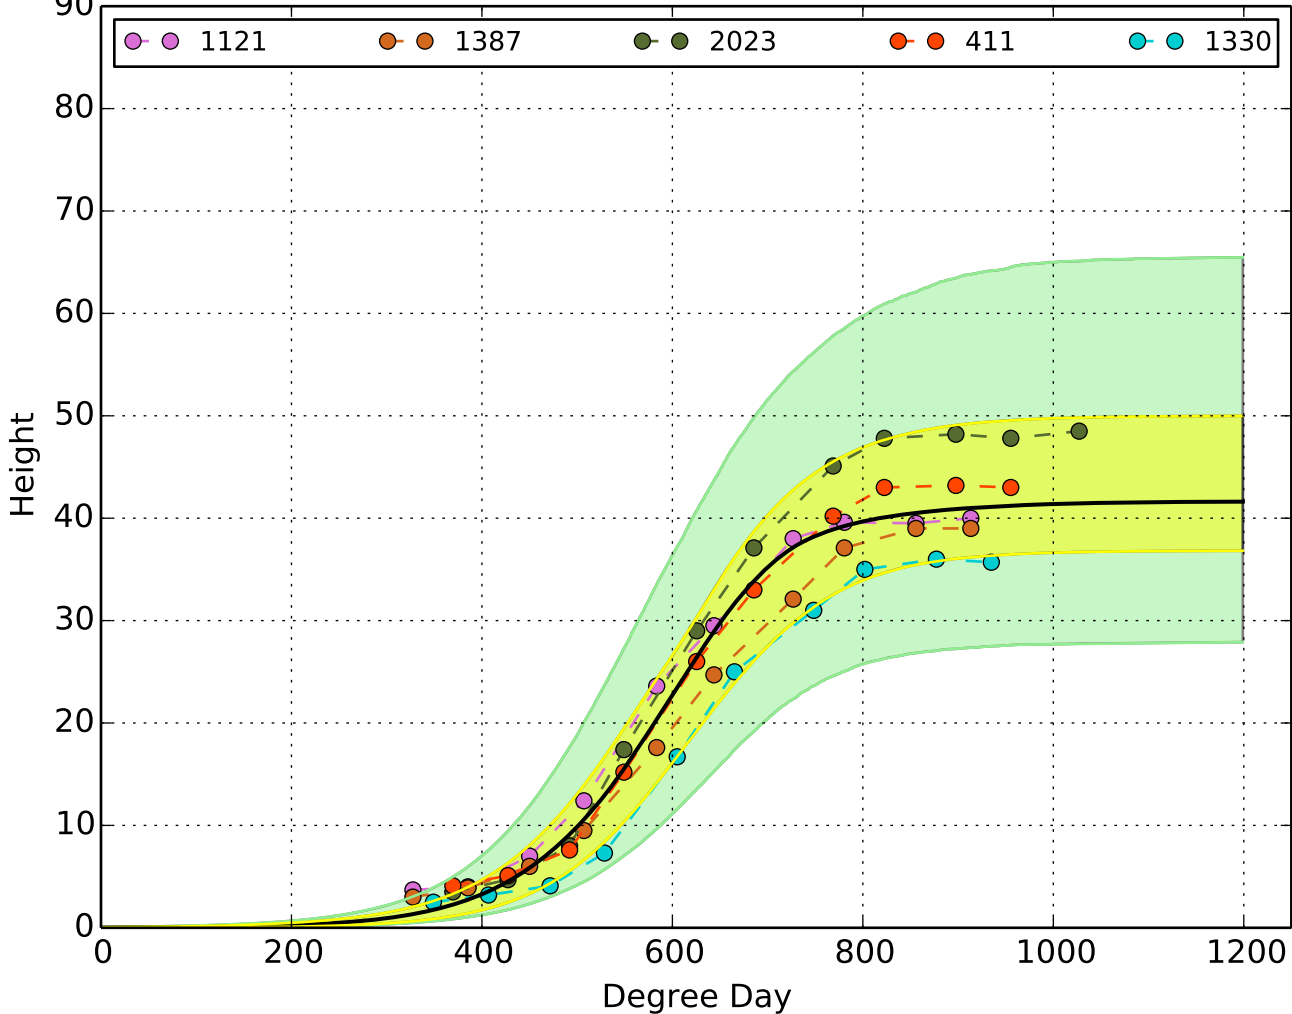

HeightModel3\_v1\_ResErrModel,Treat= CR\_2012,Line 89 (#Inv=8);95CI GrowthCurves

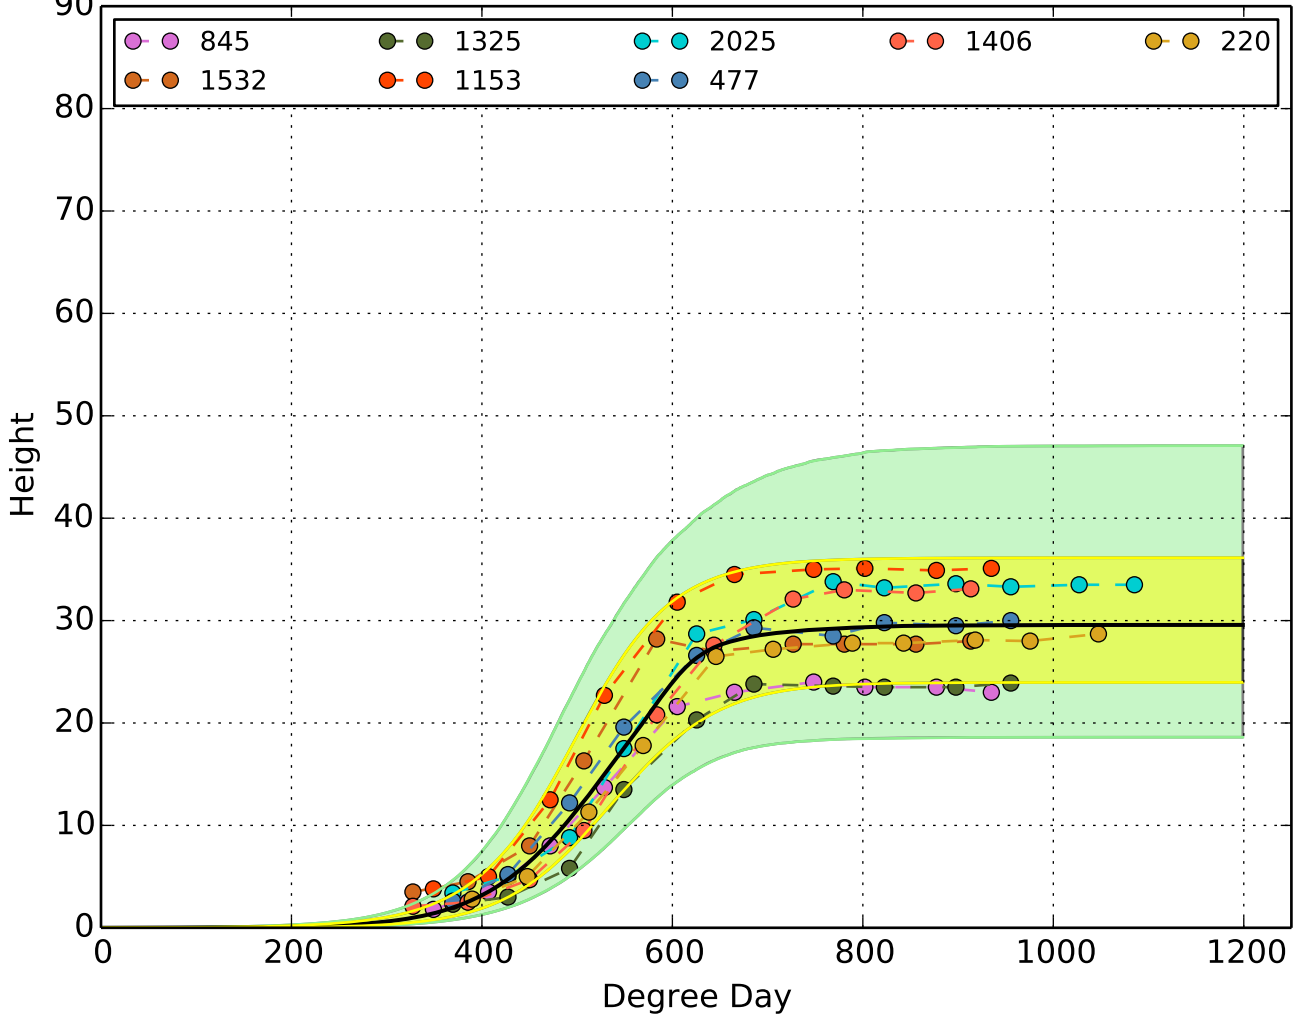

HeightModel3\_v1\_ResErrModel,Treat= CR\_2012,Line 93 (#Inv=7);95CI GrowthCurves

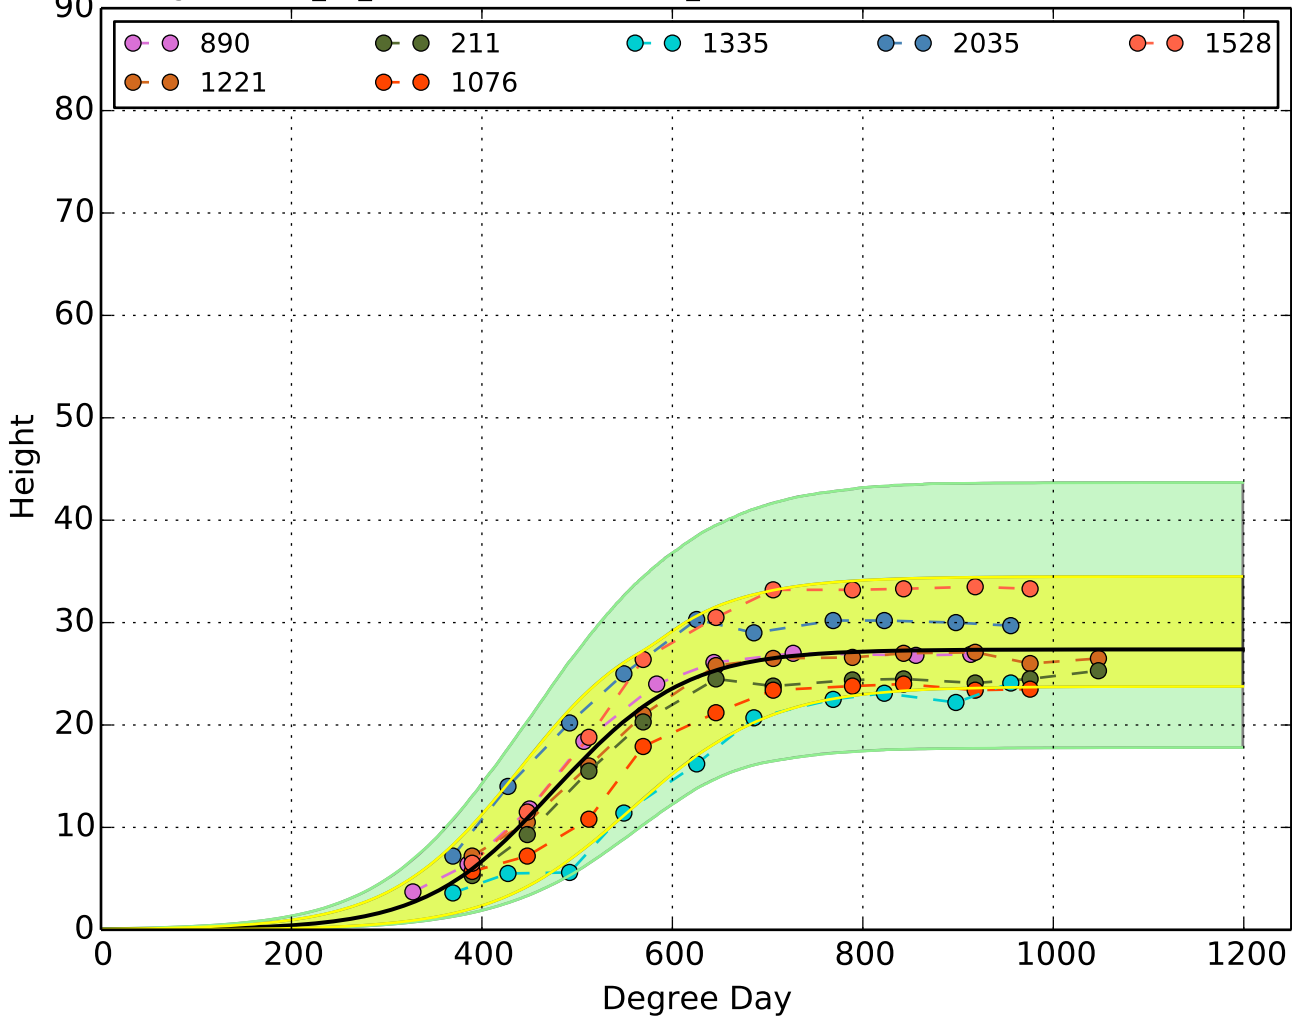

HeightModel3\_v1\_ResErrModel,Treat= CR\_2012,Line 103 (#Inv=7);95CI GrowthCurves

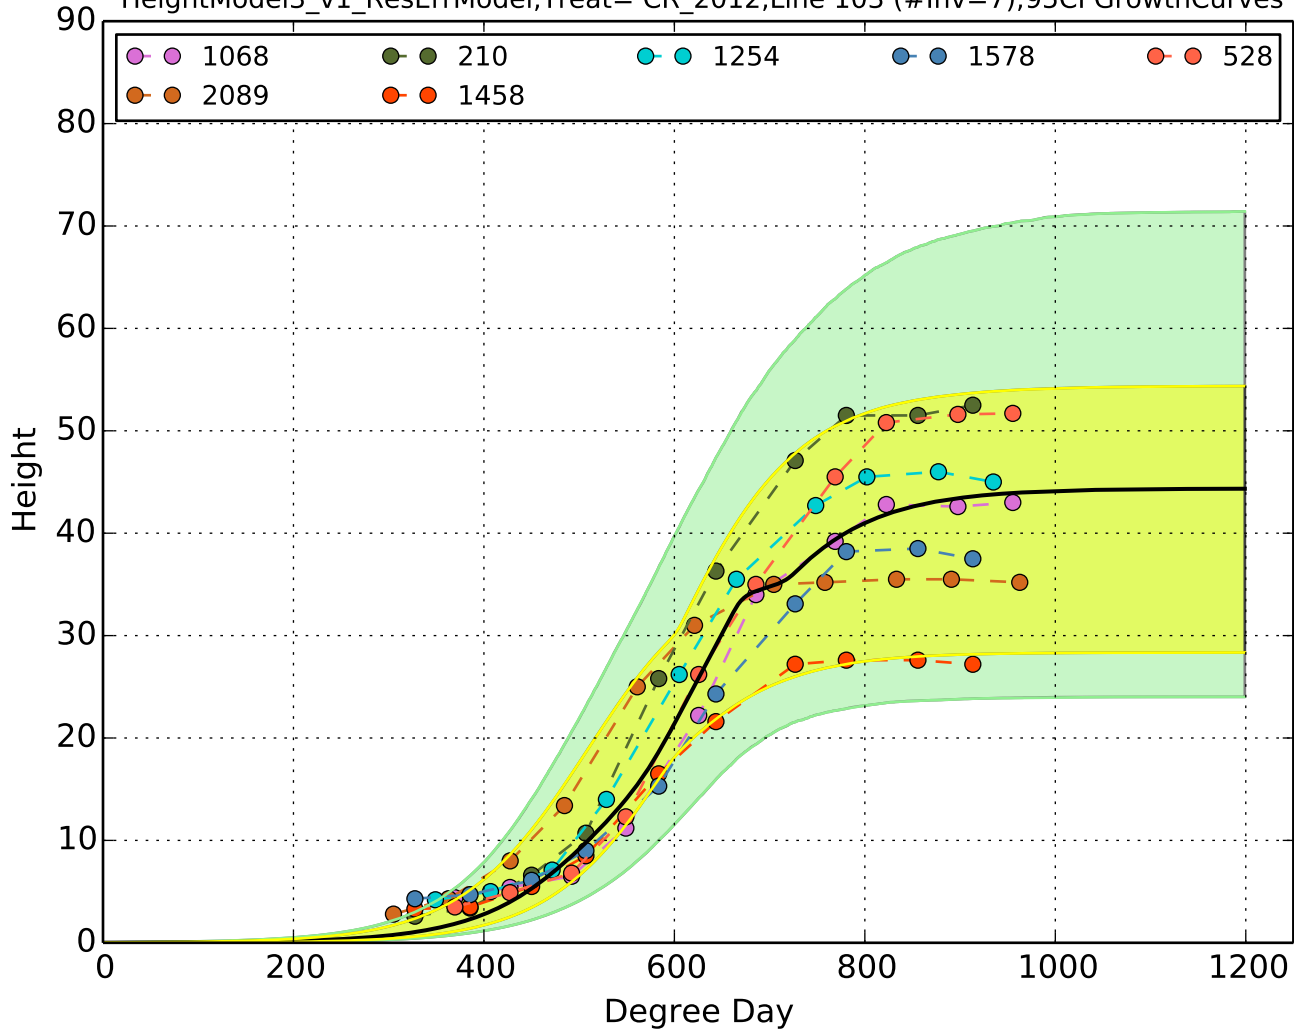

HeightModel3\_v1\_ResErrModel,Treat= CR\_2012,Line 115 (#Inv=7);95CI GrowthCurves

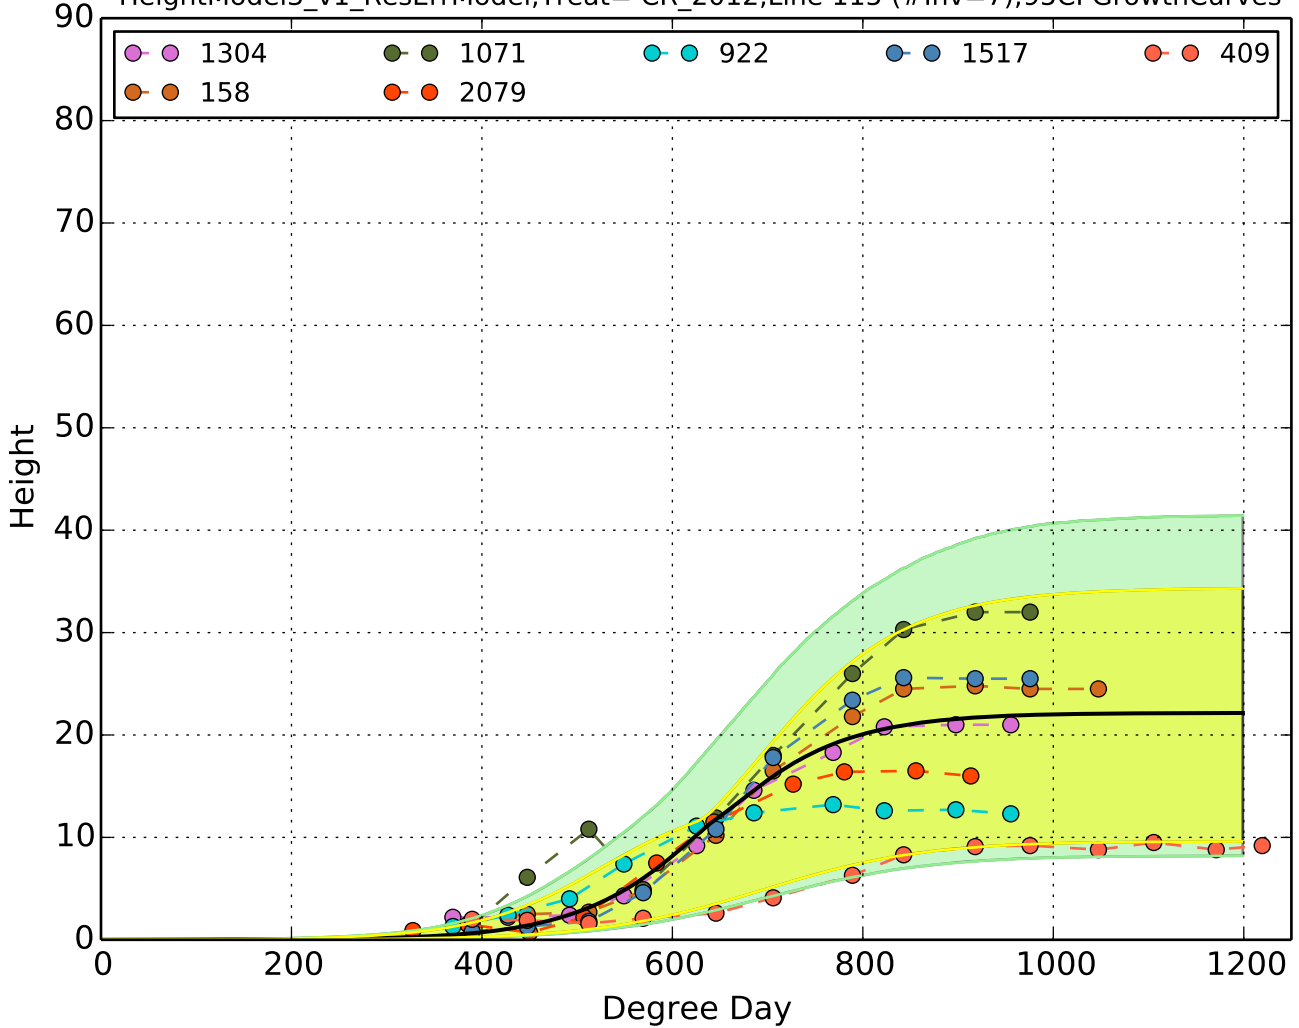



HeightModel3\_v1\_ResErrModel,Treat= CR\_2012,Line 124 (#Inv=7);95CI GrowthCurves

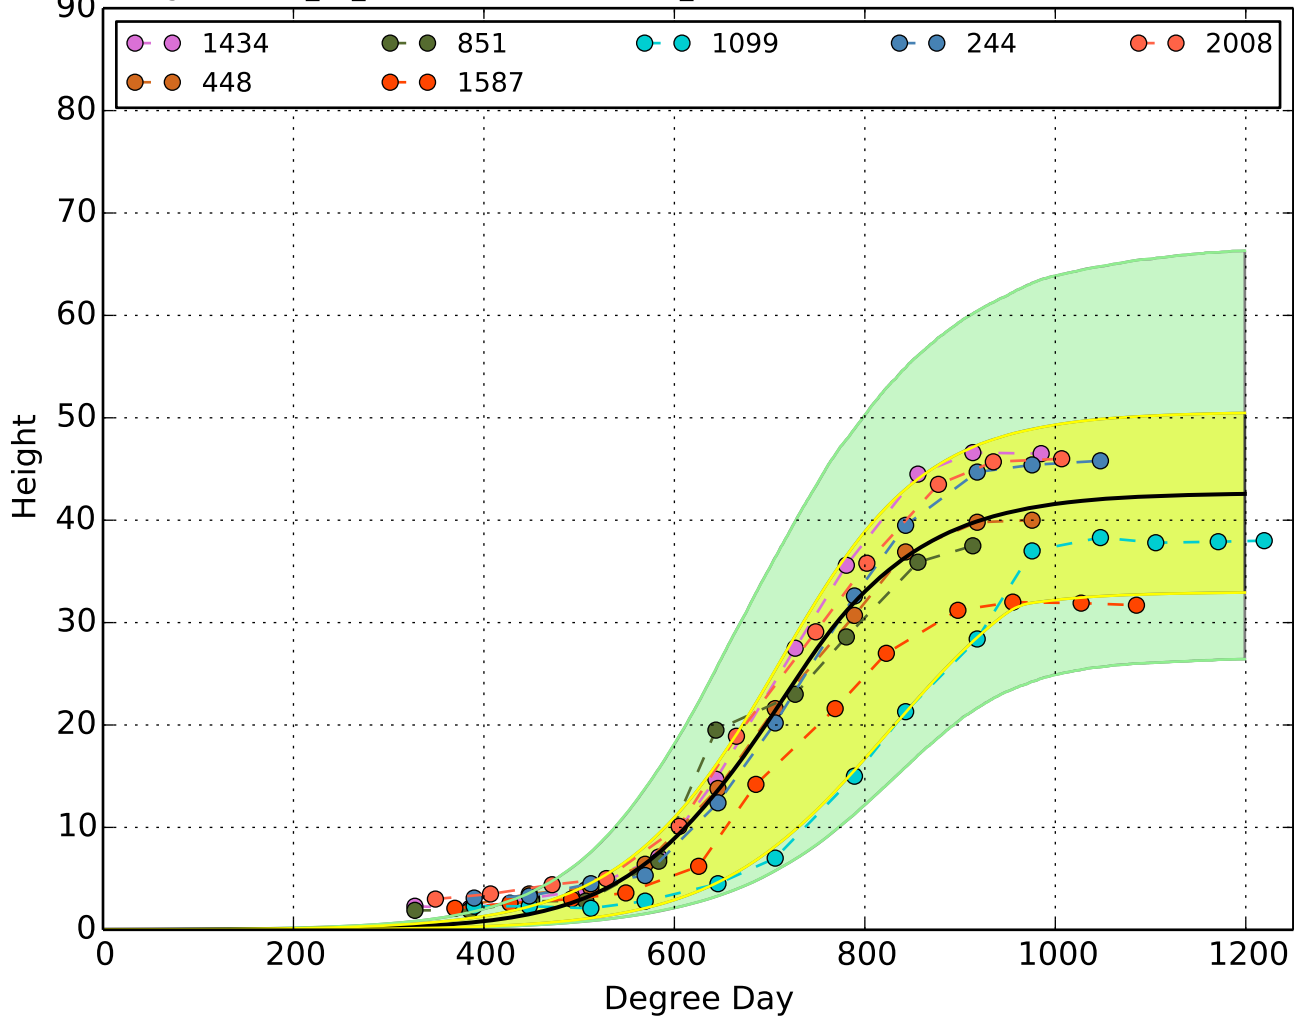

HeightModel3\_v1\_ResErrModel,Treat= CR\_2012,Line 131 (#Inv=8);95CI GrowthCurves

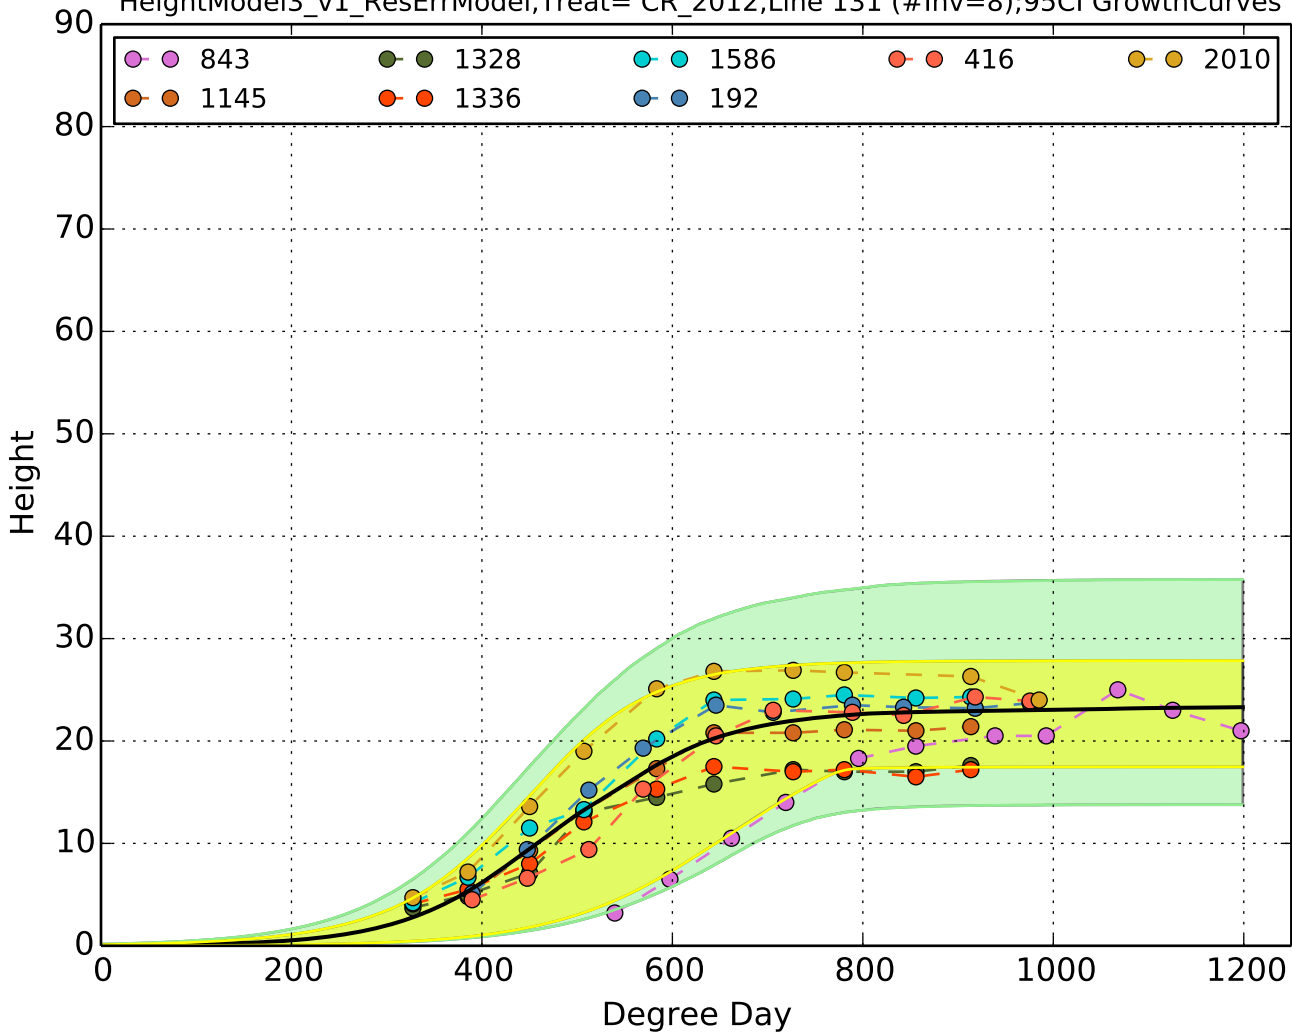

HeightModel3\_v1\_ResErrModel,Treat= CR\_2012,Line 136 (#Inv=8);95CI GrowthCurves

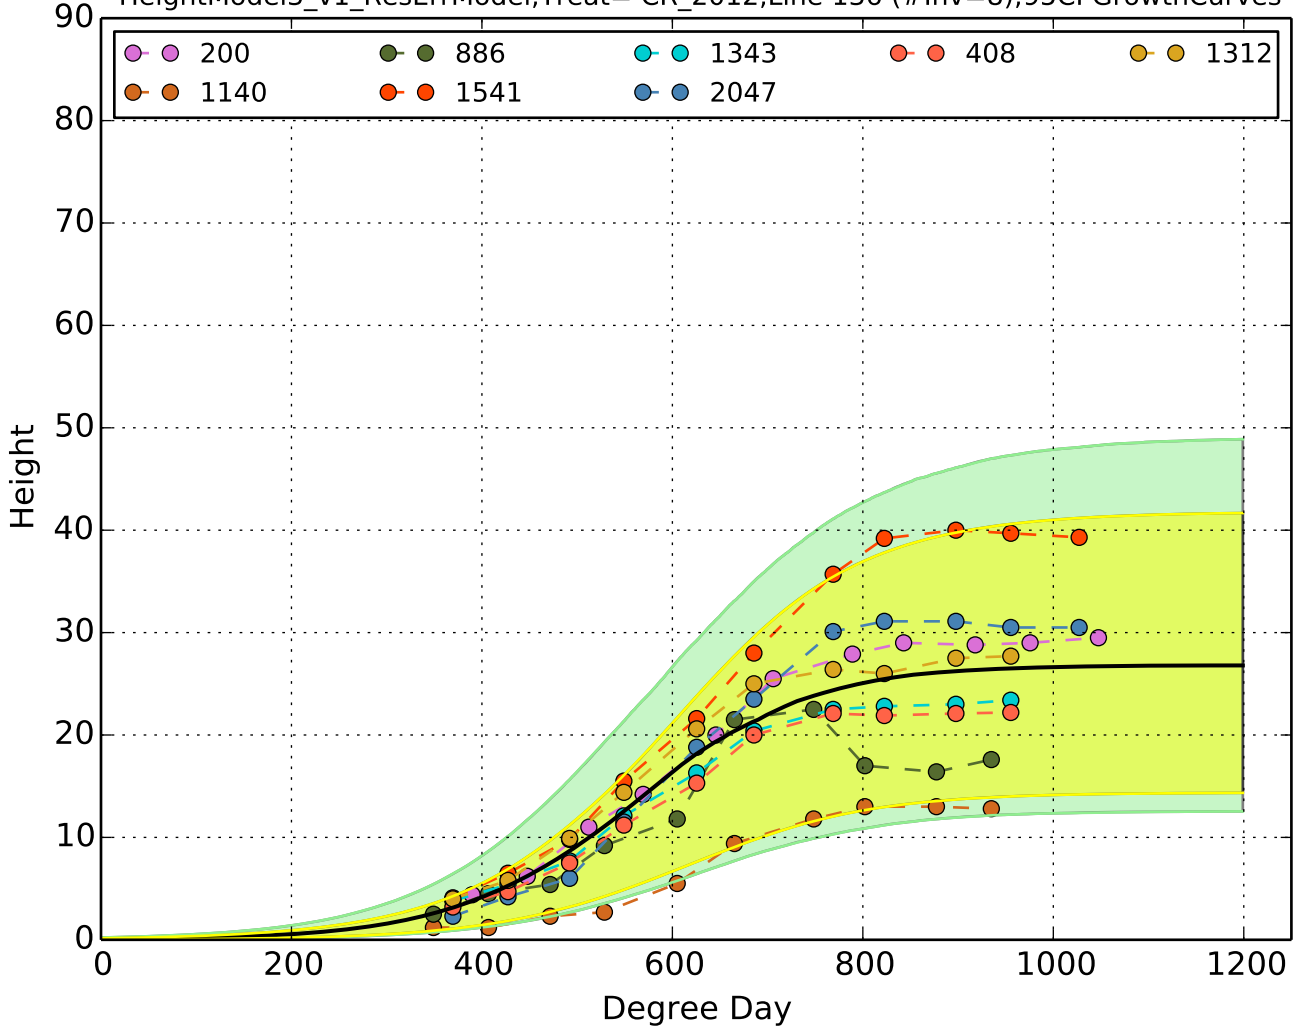

HeightModel3\_v1\_ResErrModel,Treat= CR\_2012,Line 143 (#Inv=6);95CI GrowthCurves

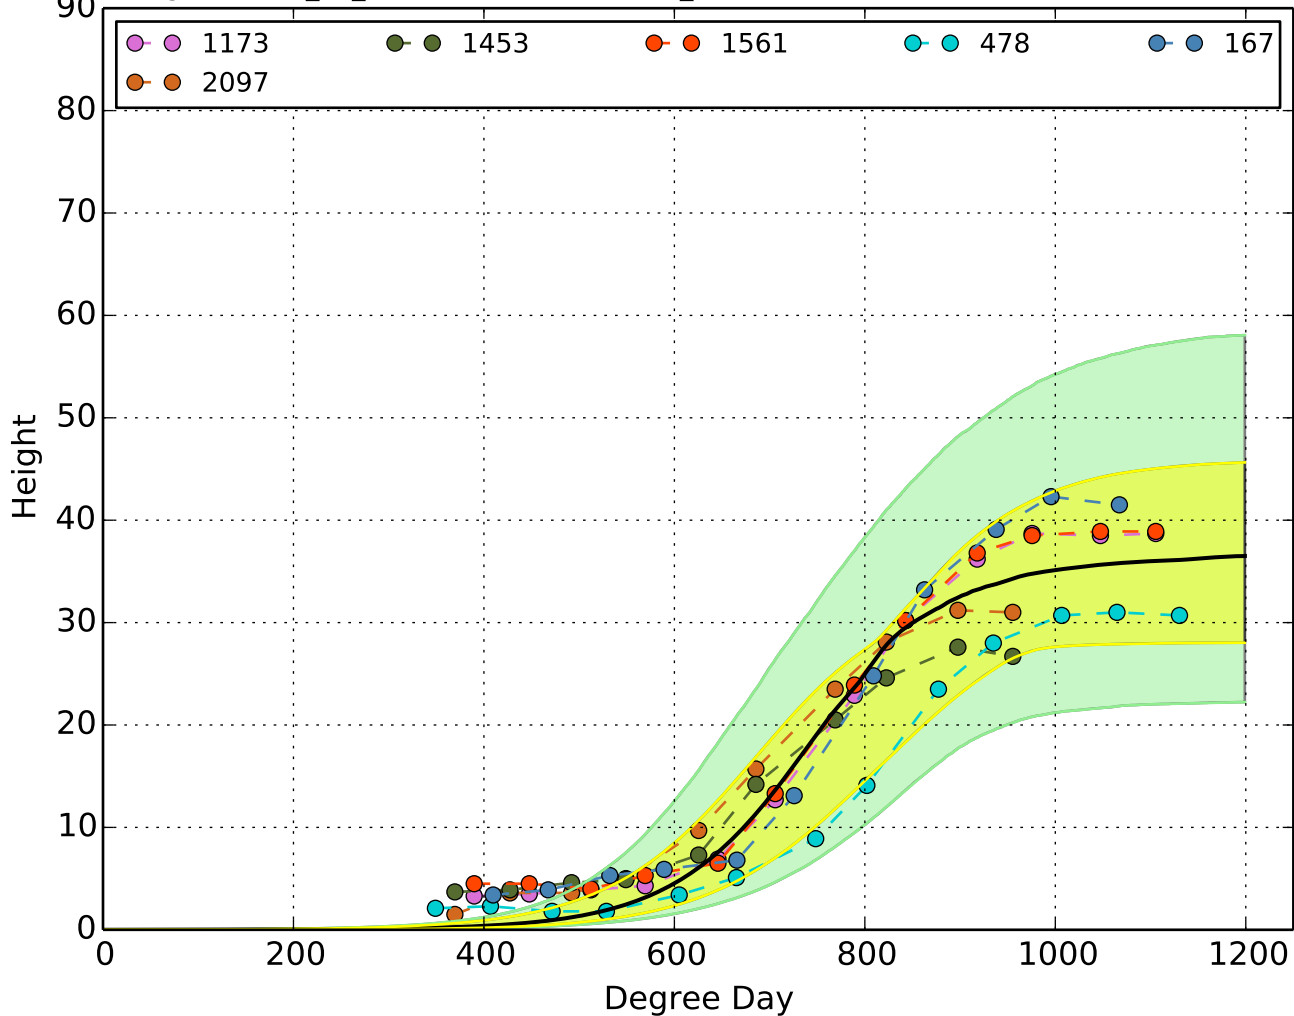

HeightModel3\_v1\_ResErrModel,Treat= CR\_2012,Line 146 (#Inv=7);95CI GrowthCurves

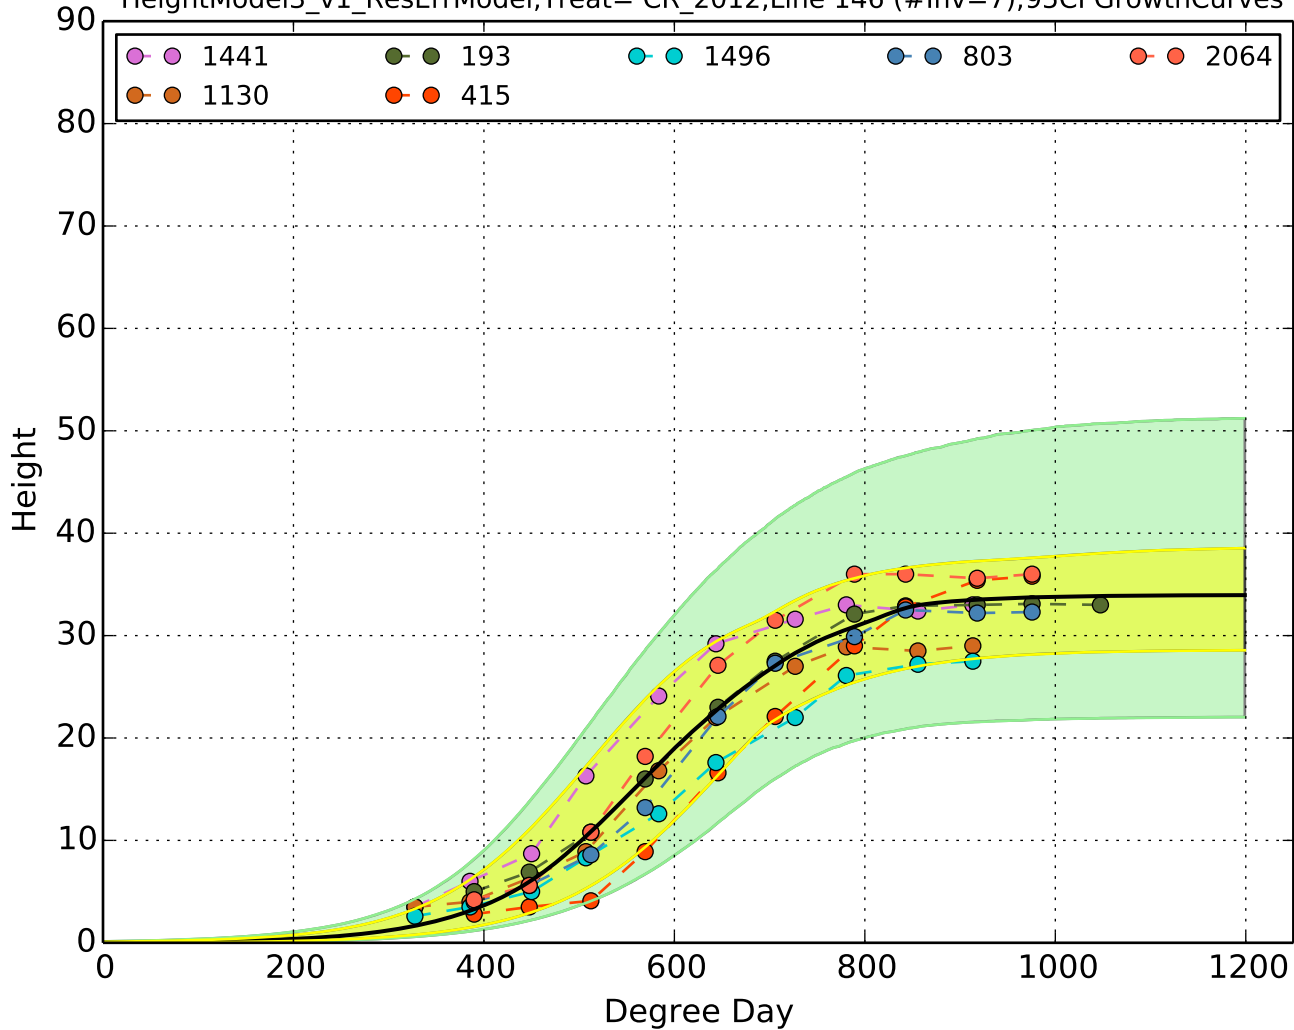

HeightModel3\_v1\_ResErrModel,Treat= CR\_2012,Line 147 (#Inv=6);95CI GrowthCurves

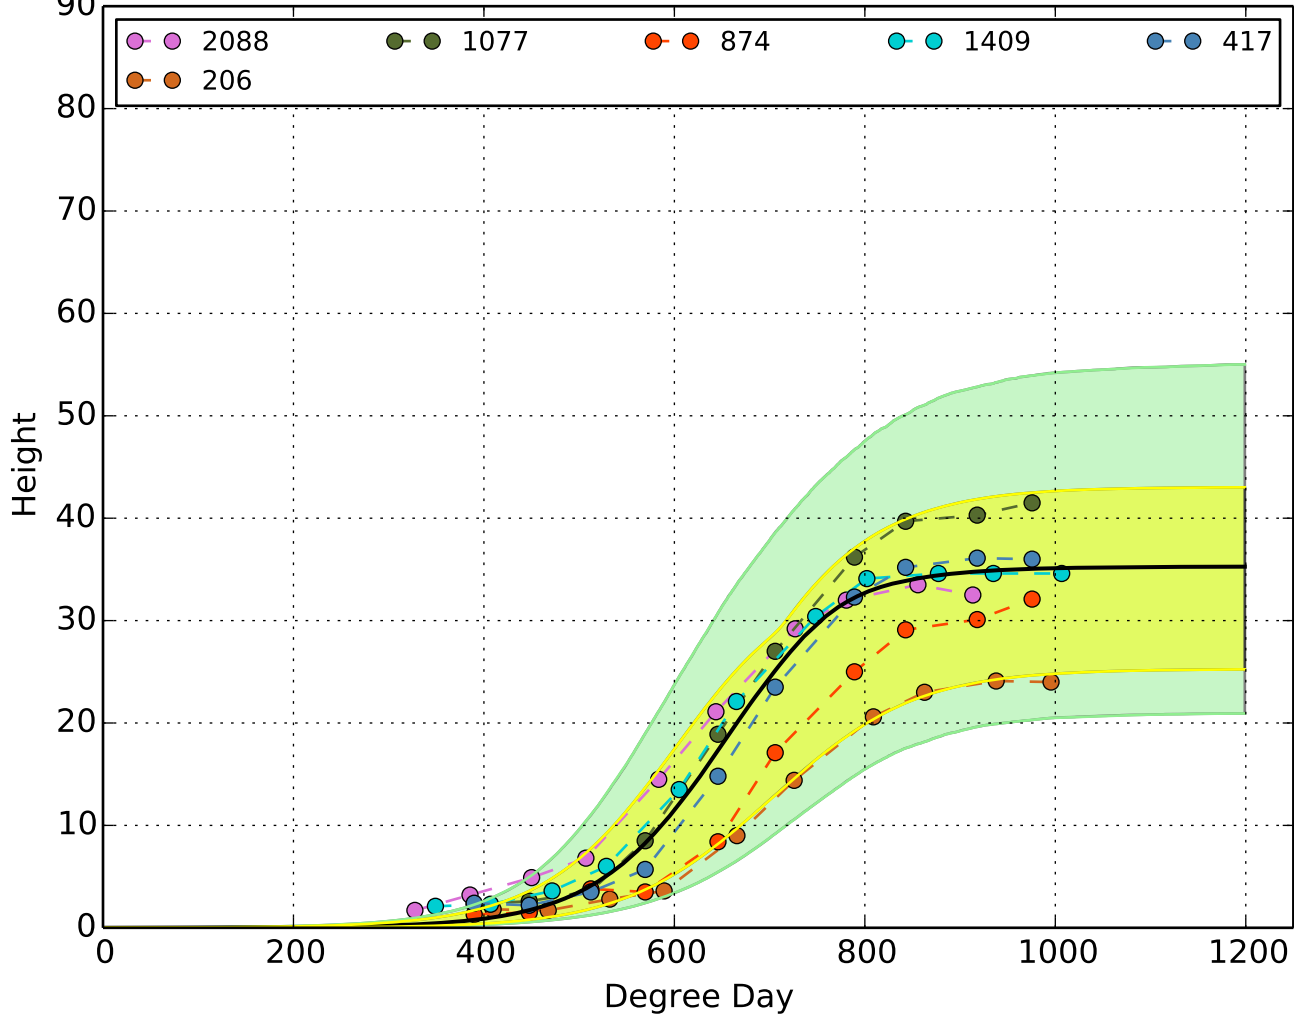

HeightModel3\_v1\_ResErrModel,Treat= CR\_2012,Line 150 (#Inv=8);95CI GrowthCurves

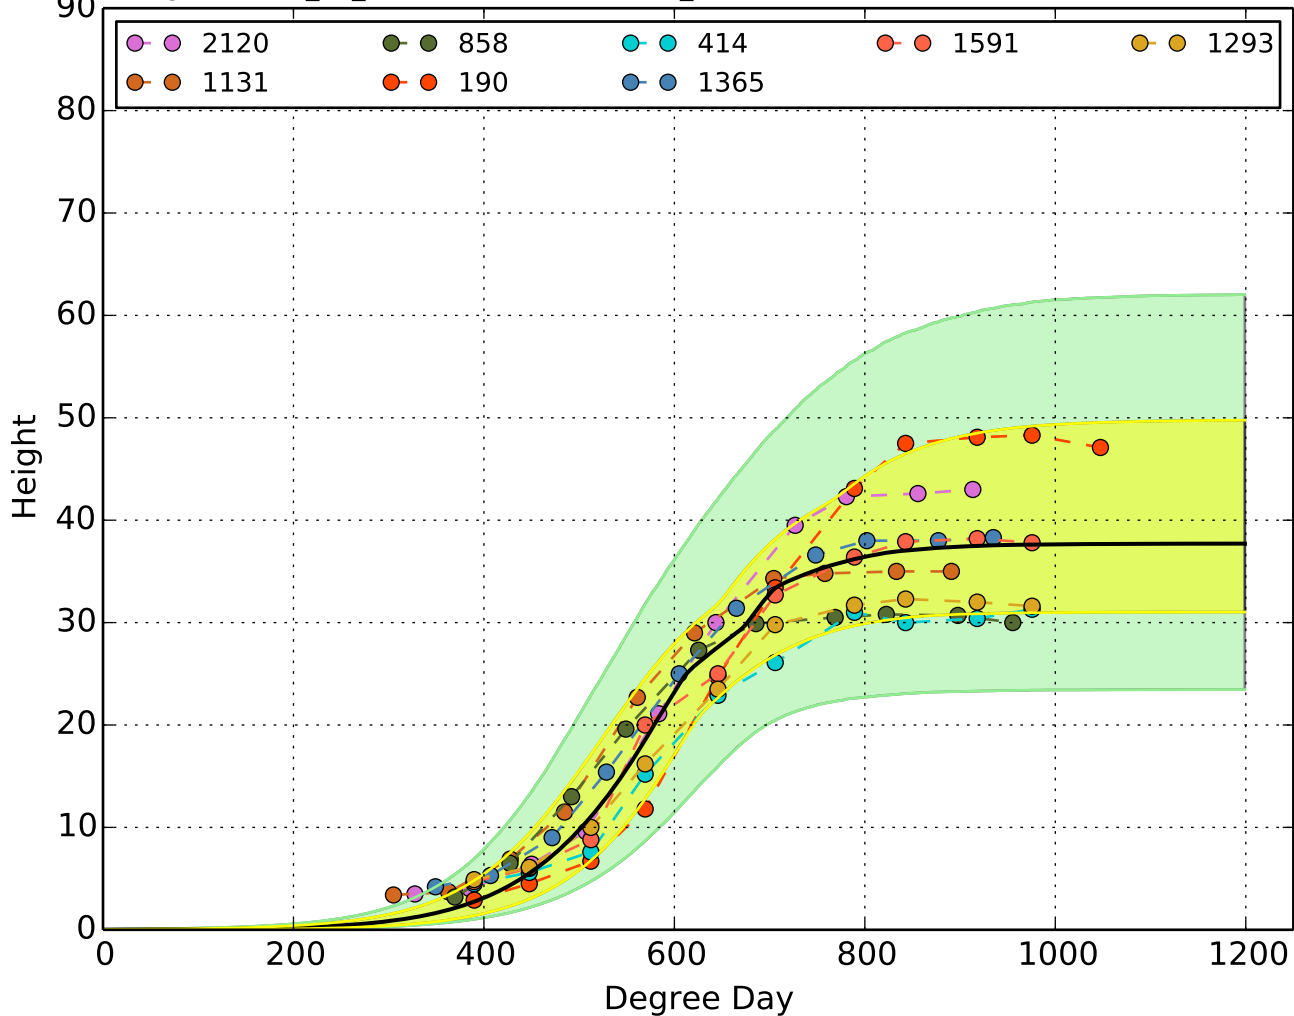

HeightModel3\_v1\_ResErrModel,Treat= CR\_2012,Line 154 (#Inv=7);95CI GrowthCurves

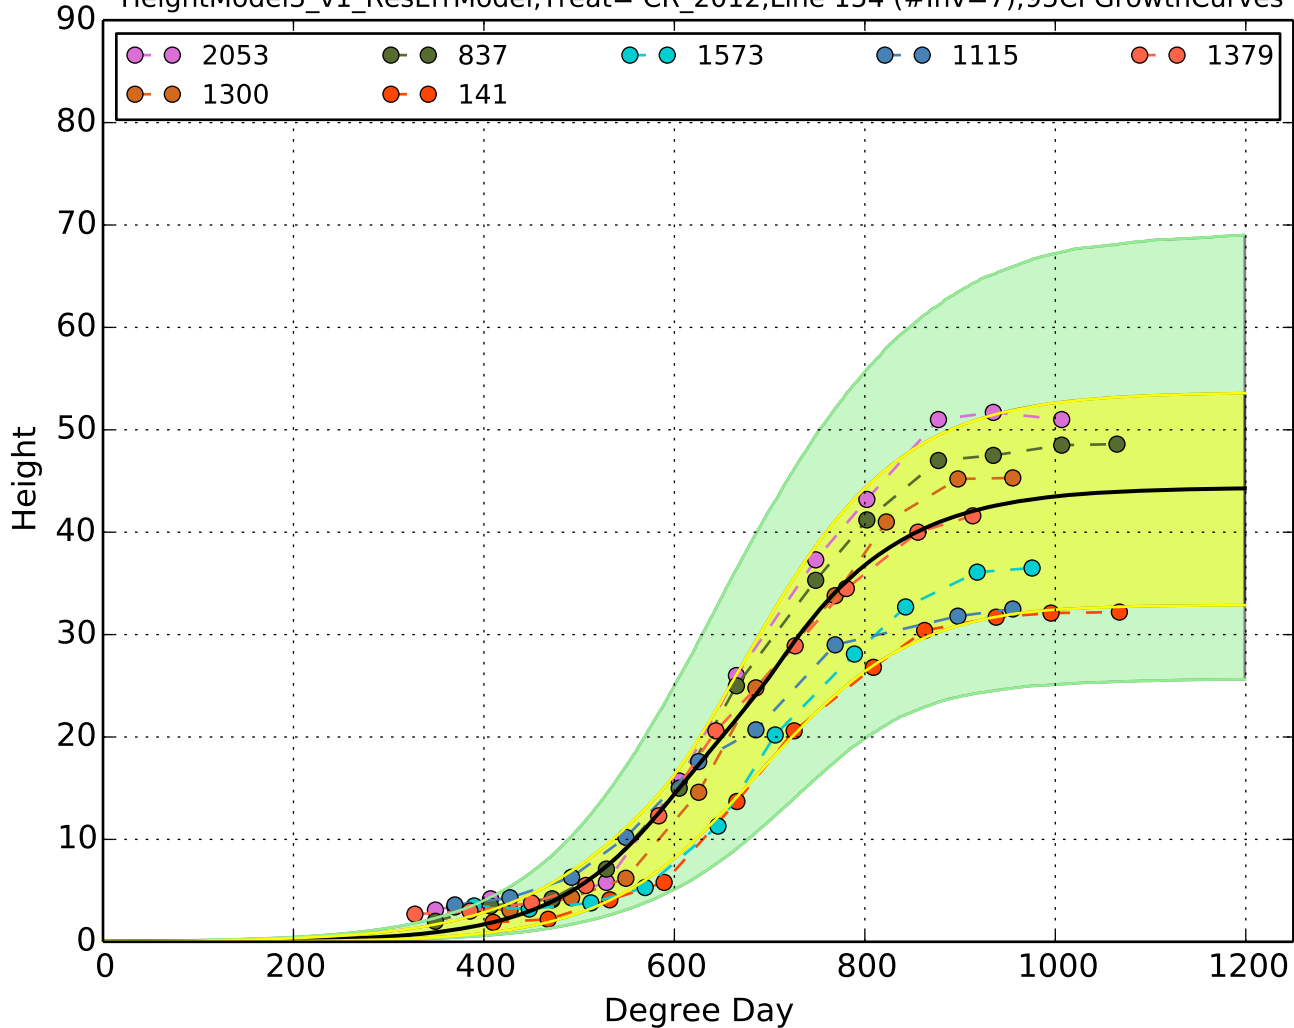



HeightModel3\_v1\_ResErrModel,Treat= CR\_2012,Line 155 (#Inv=7);95CI GrowthCurves

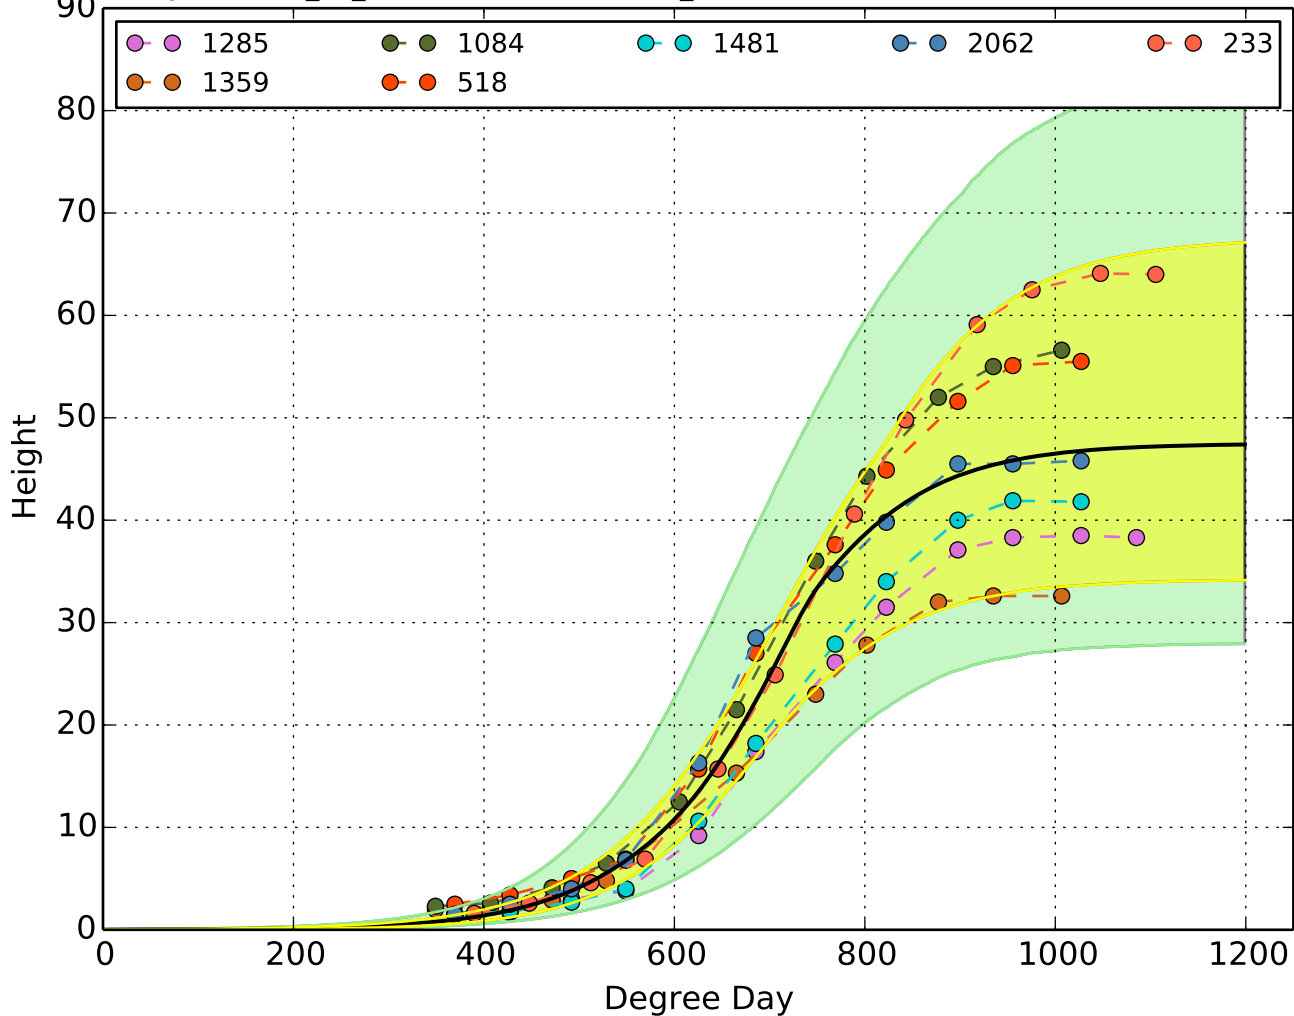

HeightModel3\_v1\_ResErrModel,Treat= CR\_2012,Line 164 (#Inv=7);95CI GrowthCurves

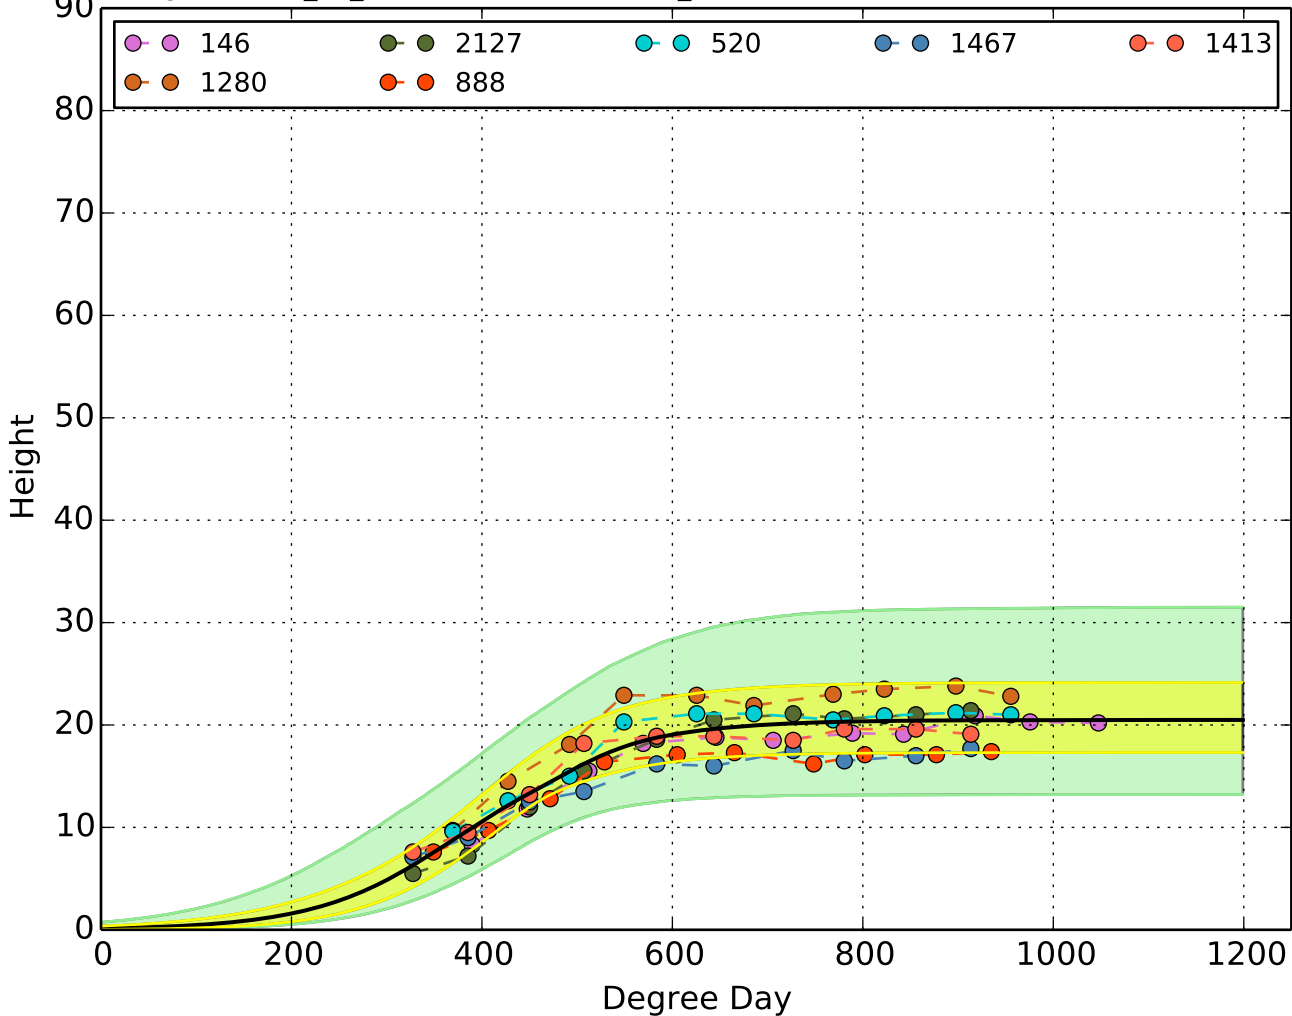

HeightModel3\_v1\_ResErrModel,Treat= CR\_2012,Line 171 (#Inv=7);95CI GrowthCurves

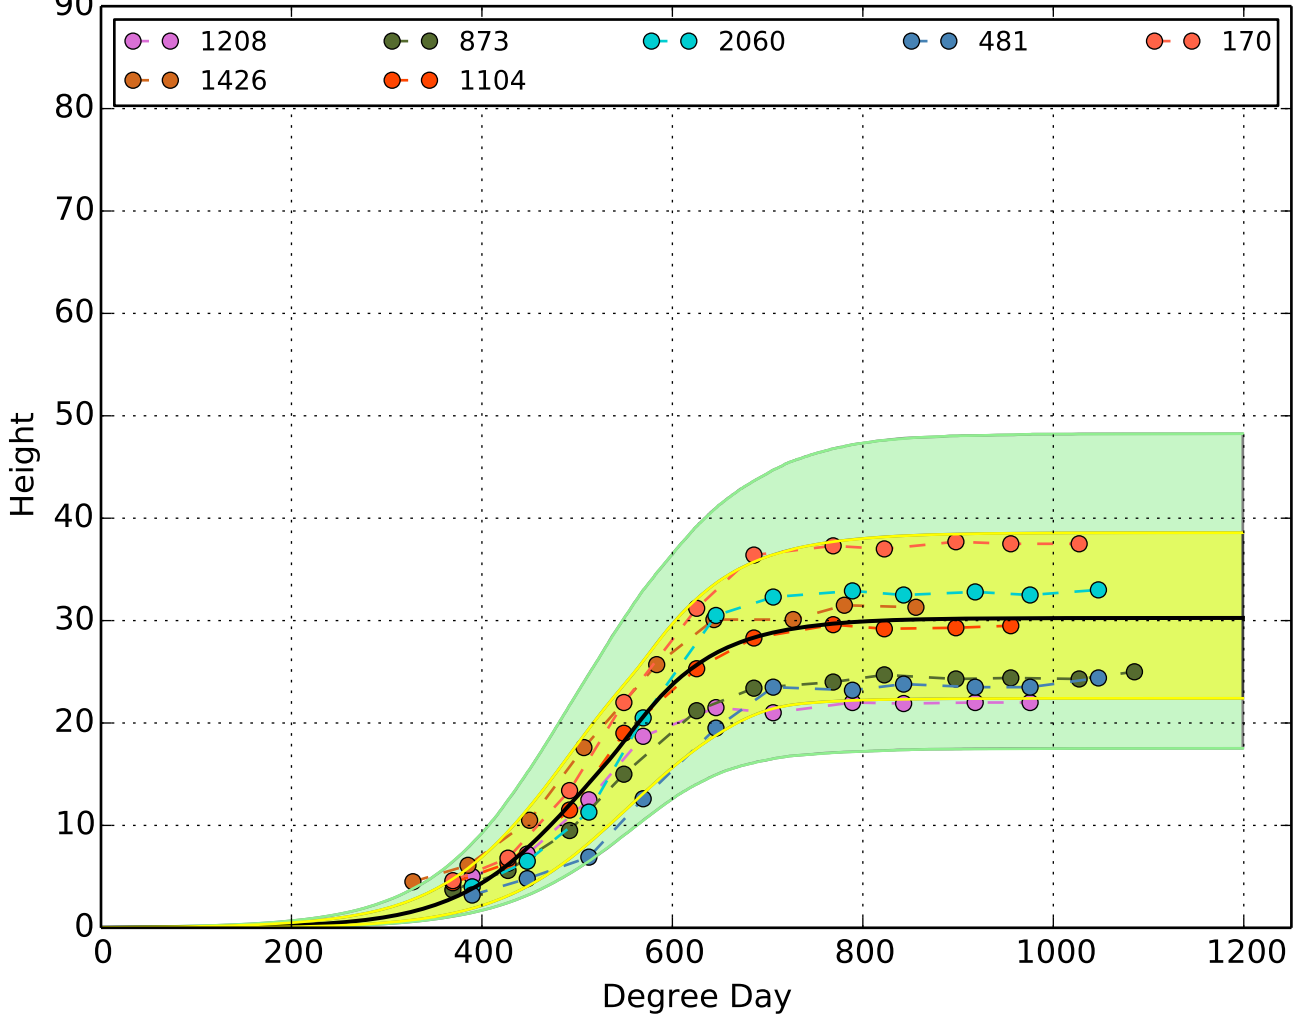

HeightModel3\_v1\_ResErrModel,Treat= CR\_2012,Line 174 (#Inv=8);95CI GrowthCurves

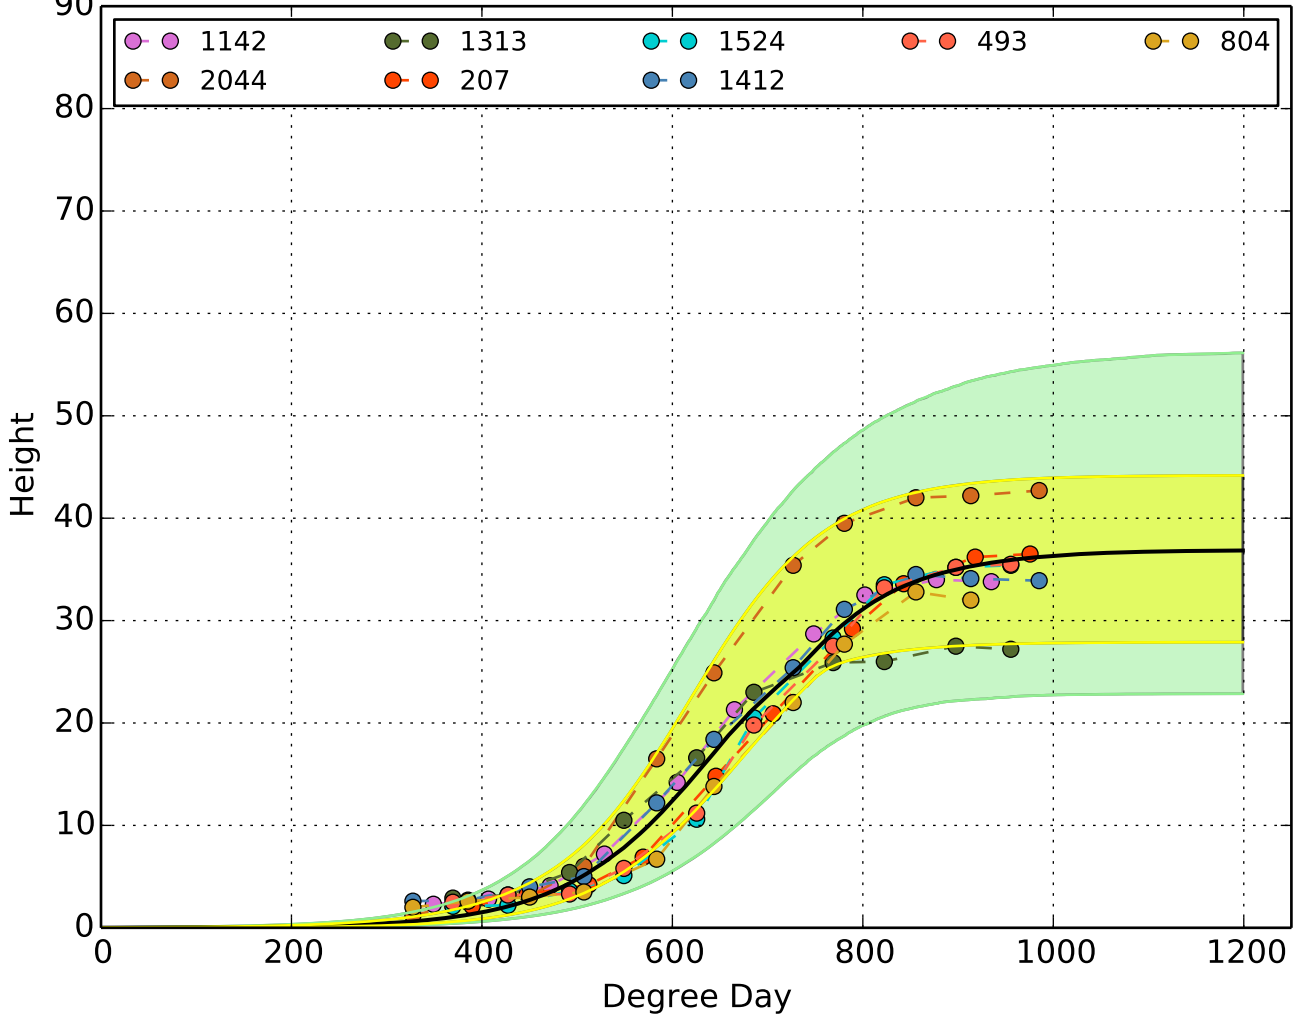

HeightModel3\_v1\_ResErrModel,Treat= CR\_2012,Line 175 (#Inv=7);95CI GrowthCurves

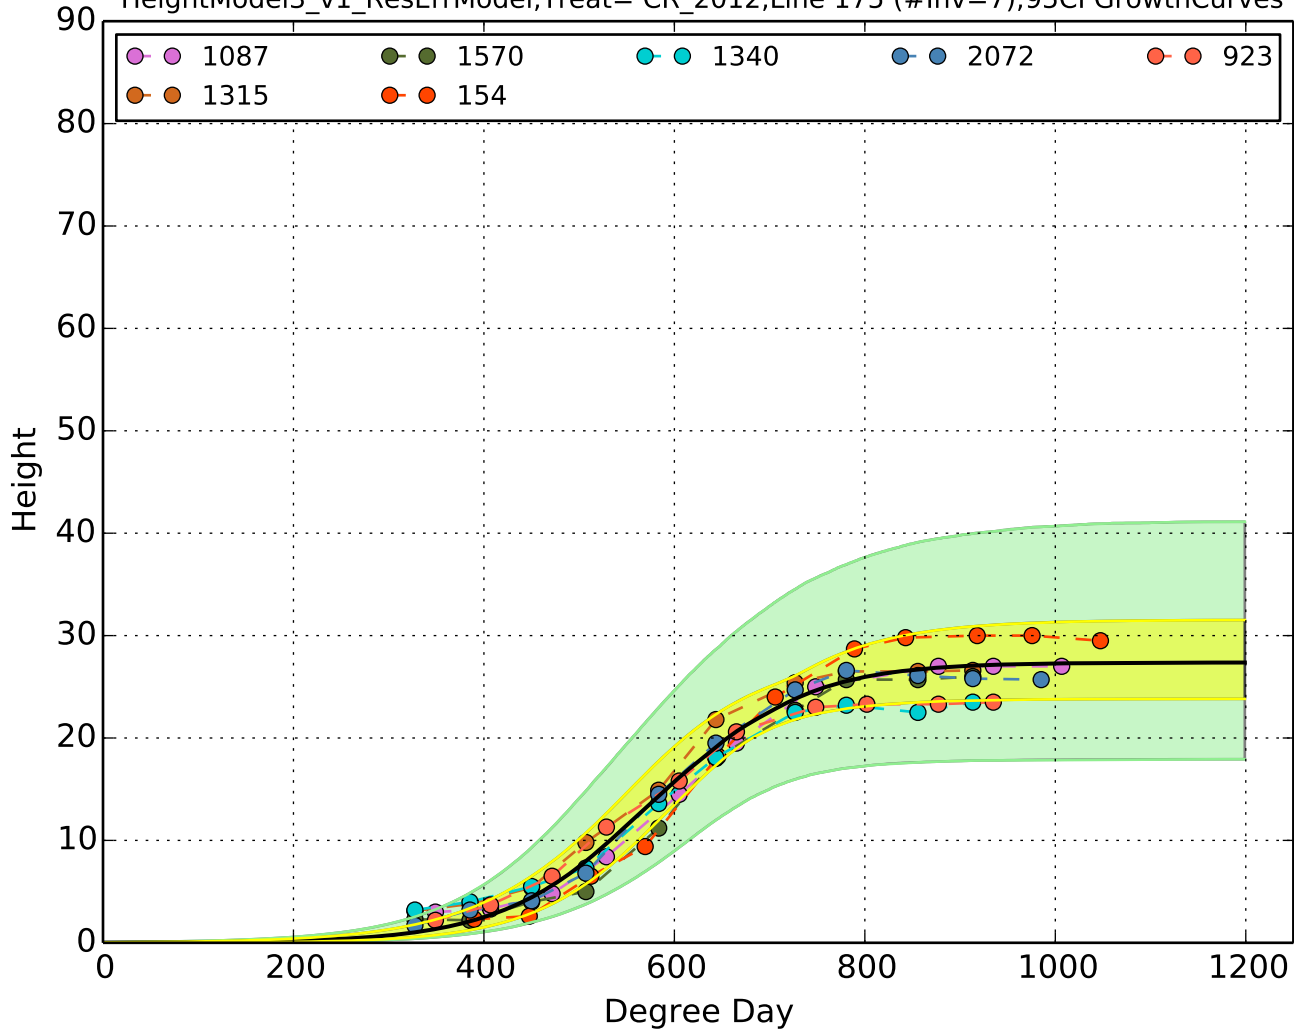

HeightModel3\_v1\_ResErrModel,Treat= CR\_2012,Line 176 (#Inv=7);95CI GrowthCurves

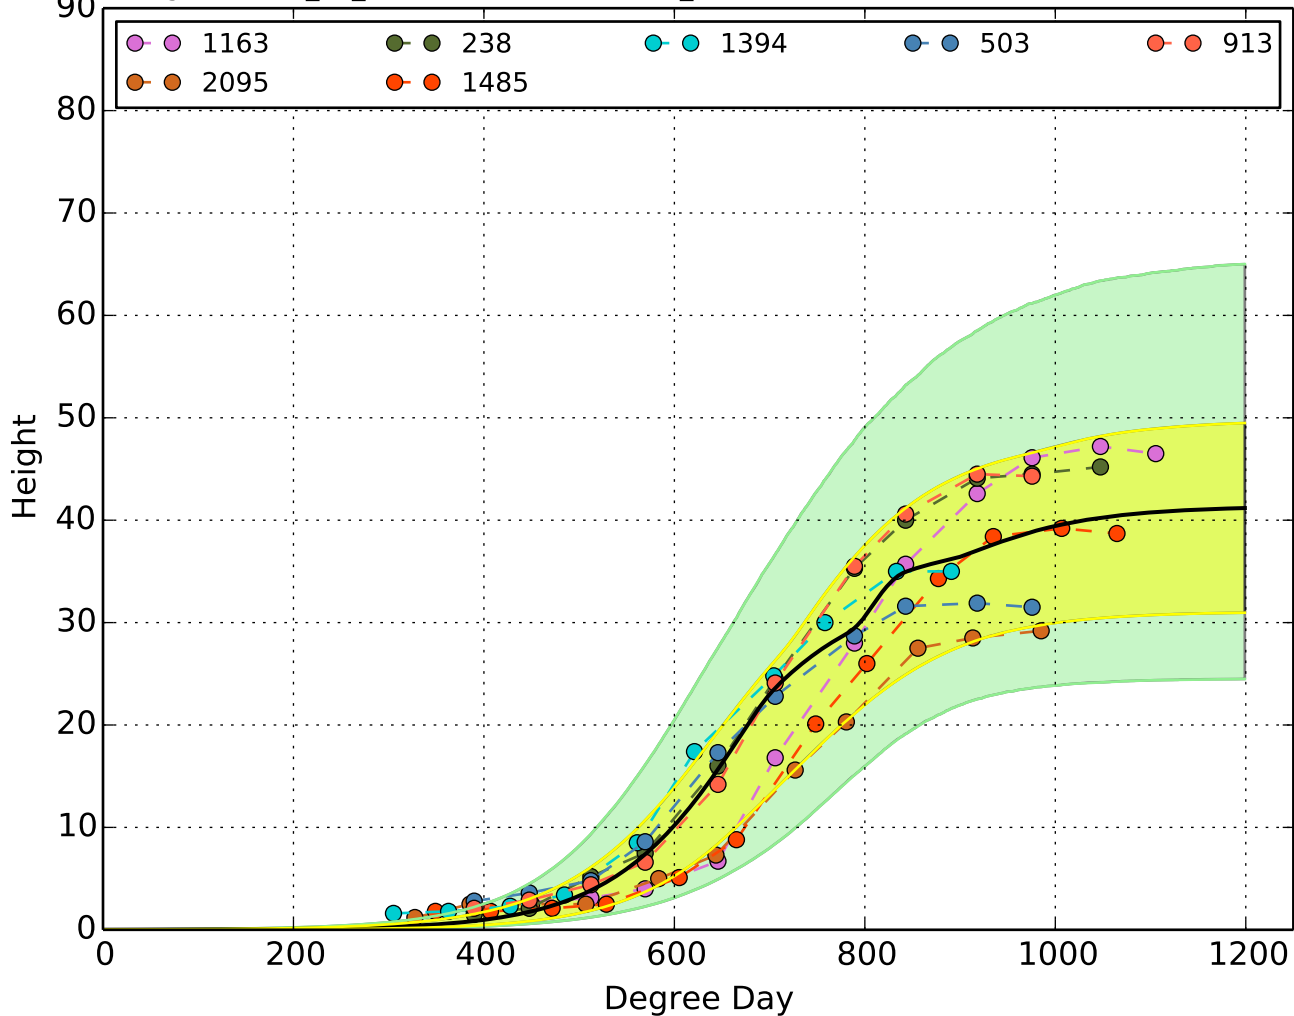

HeightModel3\_v1\_ResErrModel,Treat= CR\_2012,Line 182 (#Inv=7);95CI GrowthCurves

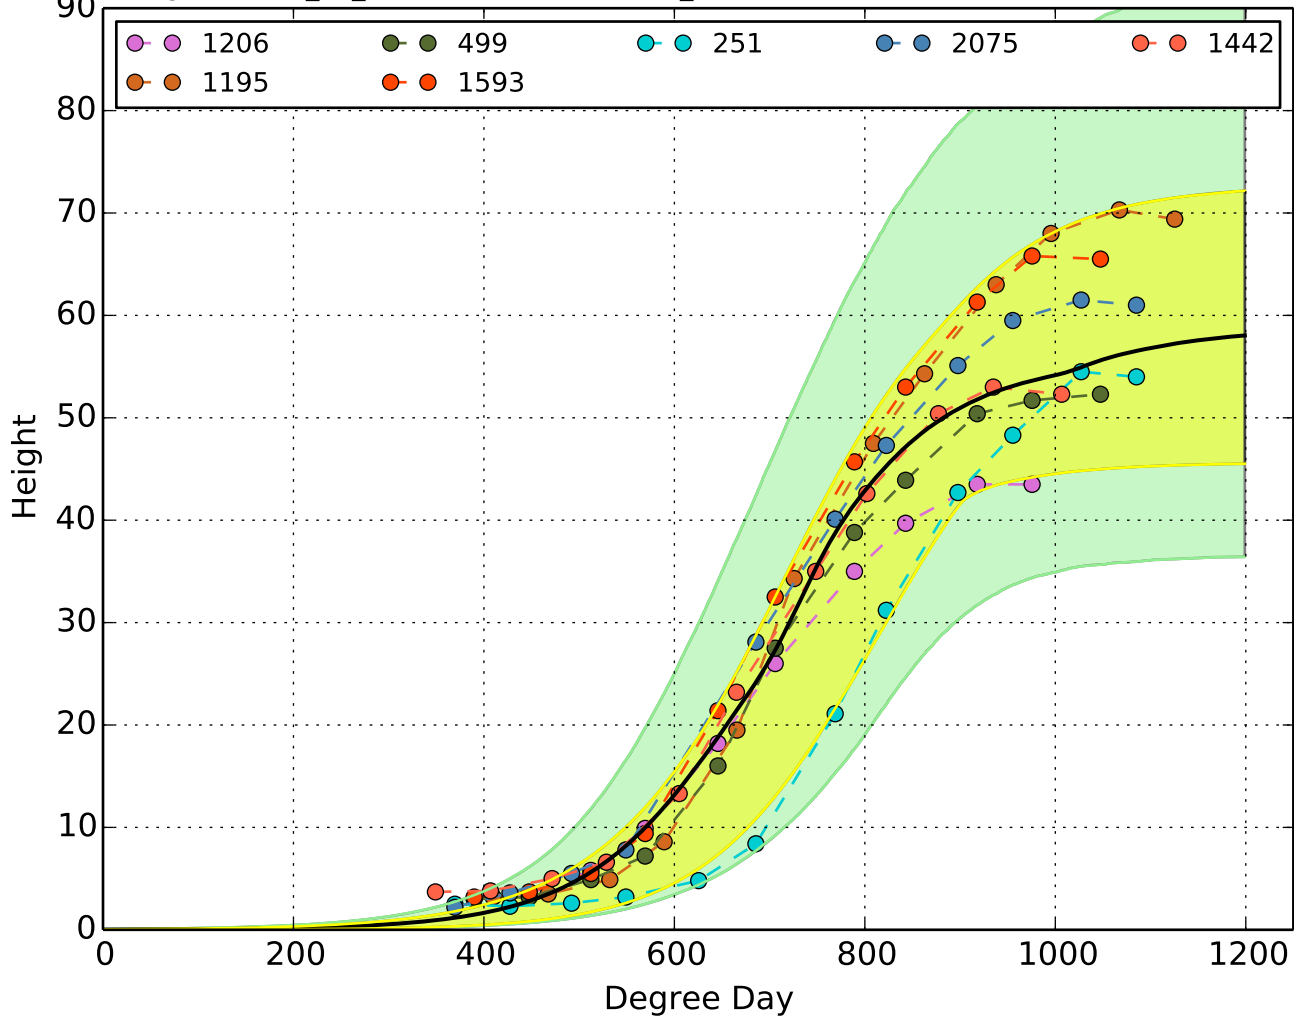

HeightModel3\_v1\_ResErrModel,Treat= CR\_2012,Line 183 (#Inv=7);95CI GrowthCurves

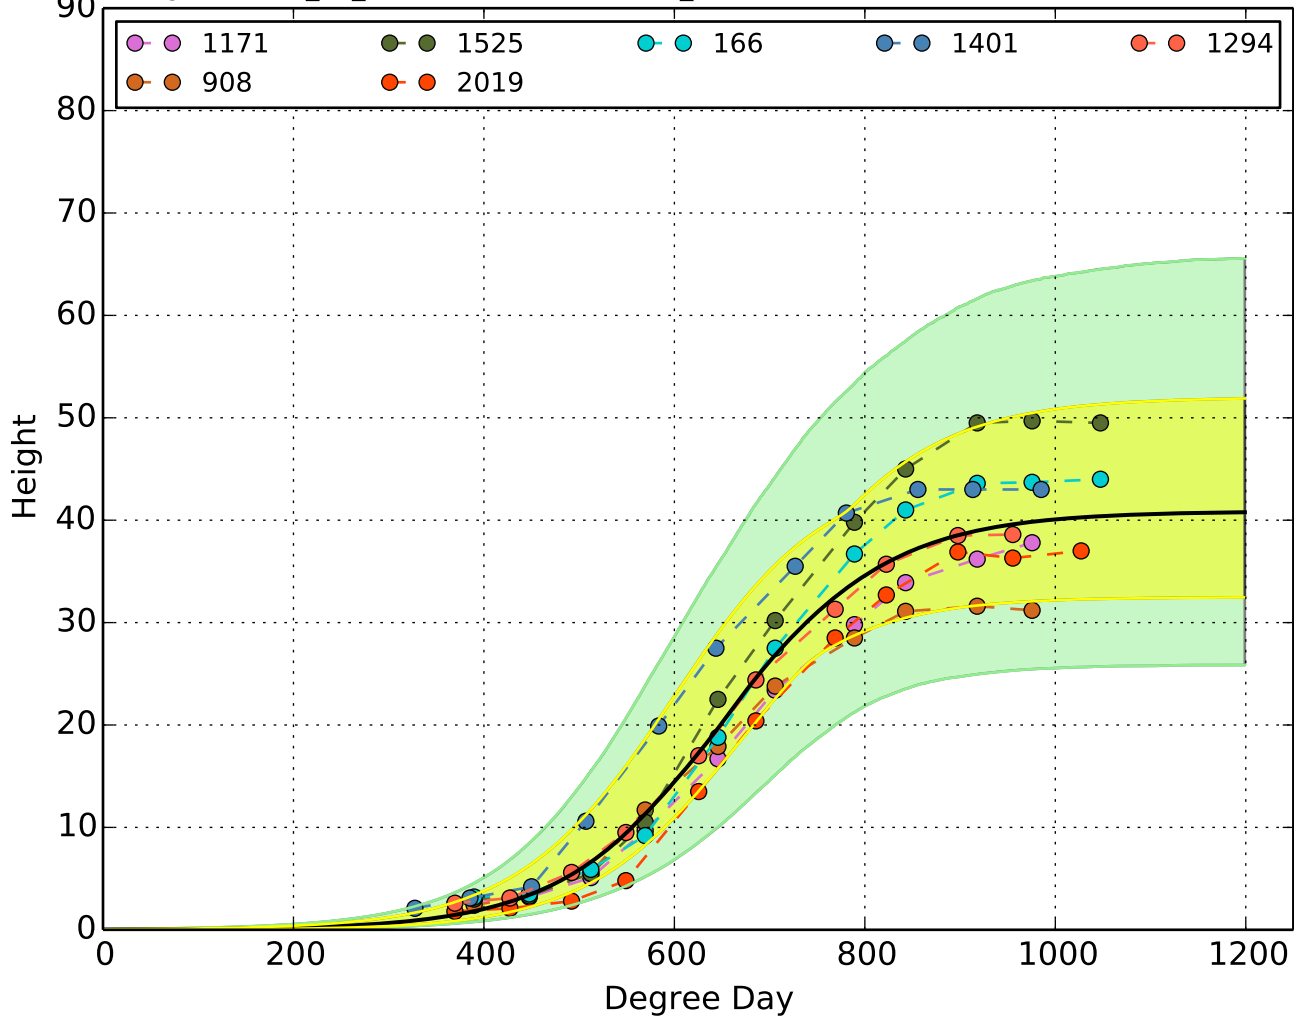



HeightModel3\_v1\_ResErrModel,Treat= CR\_2012,Line 184 (#Inv=7);95CI GrowthCurves

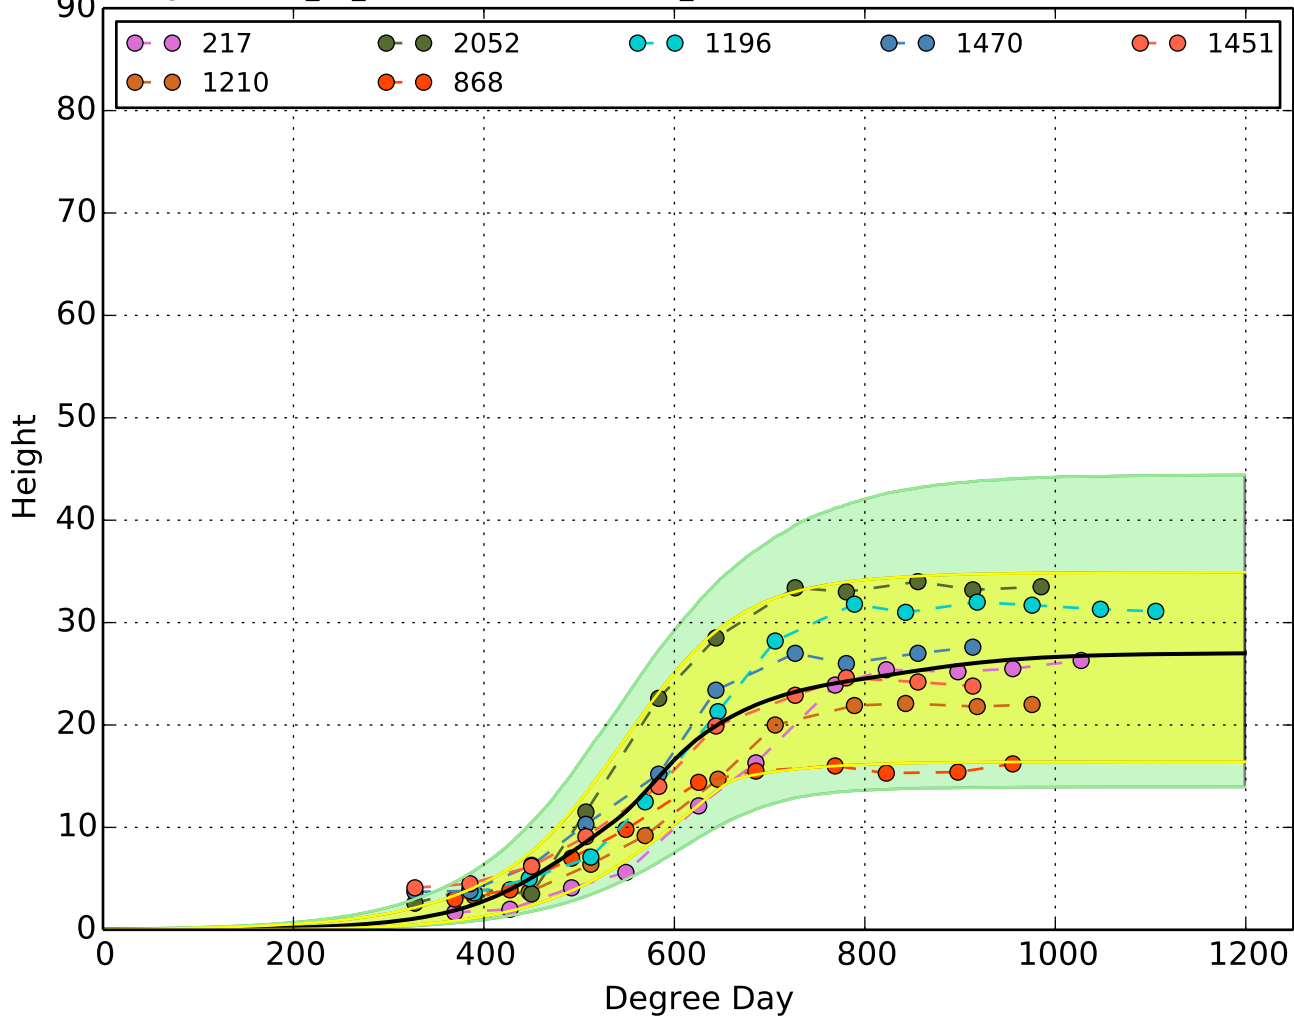

HeightModel3\_v1\_ResErrModel,Treat= CR\_2012,Line 187 (#Inv=7);95CI GrowthCurves

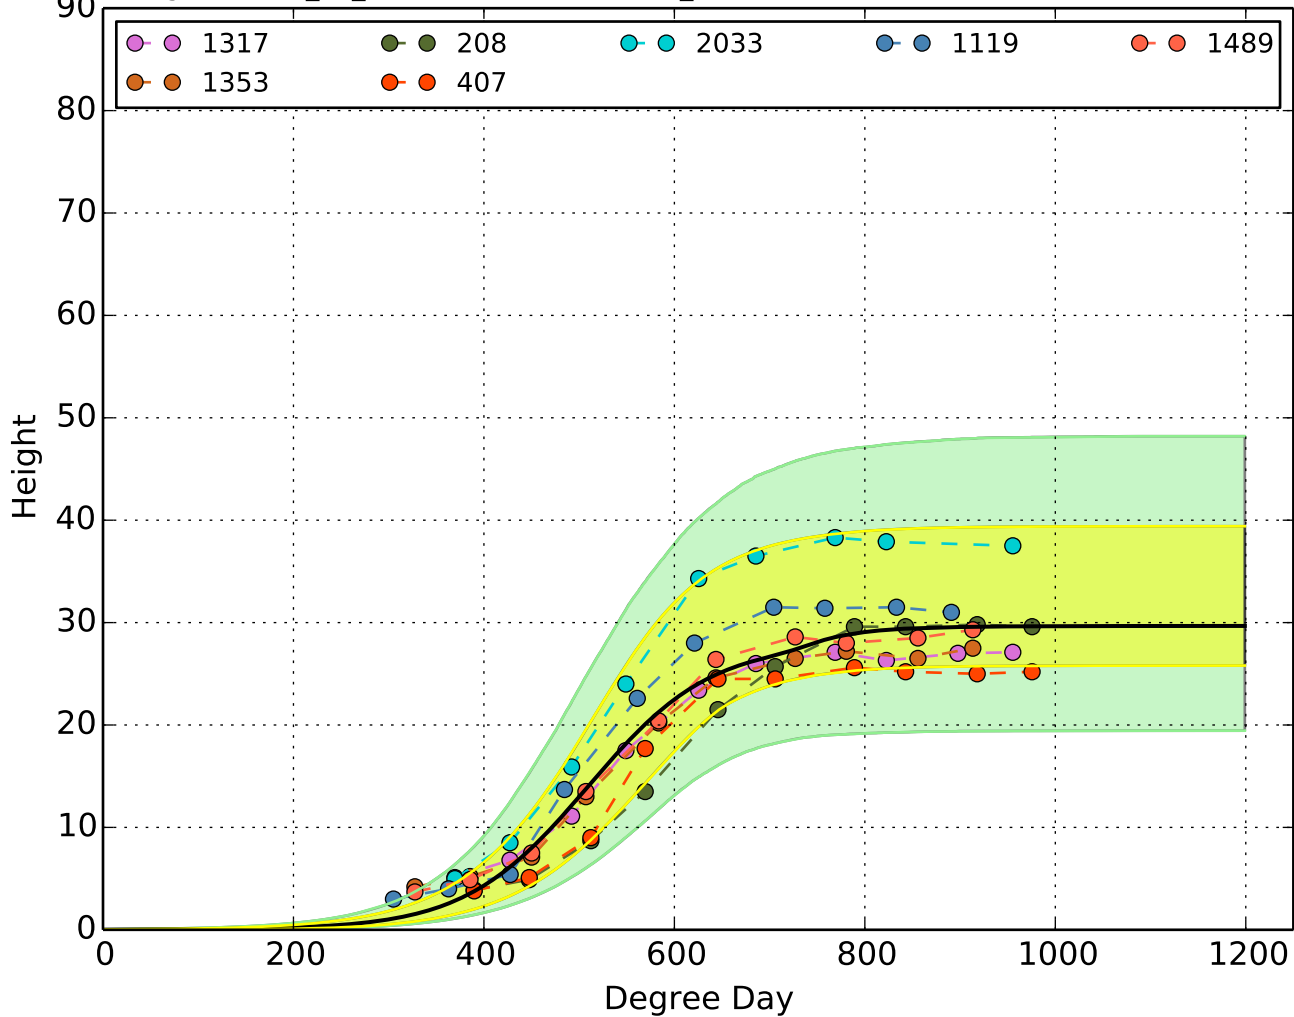

HeightModel3\_v1\_ResErrModel,Treat= CR\_2012,Line 190 (#Inv=6);95CI GrowthCurves

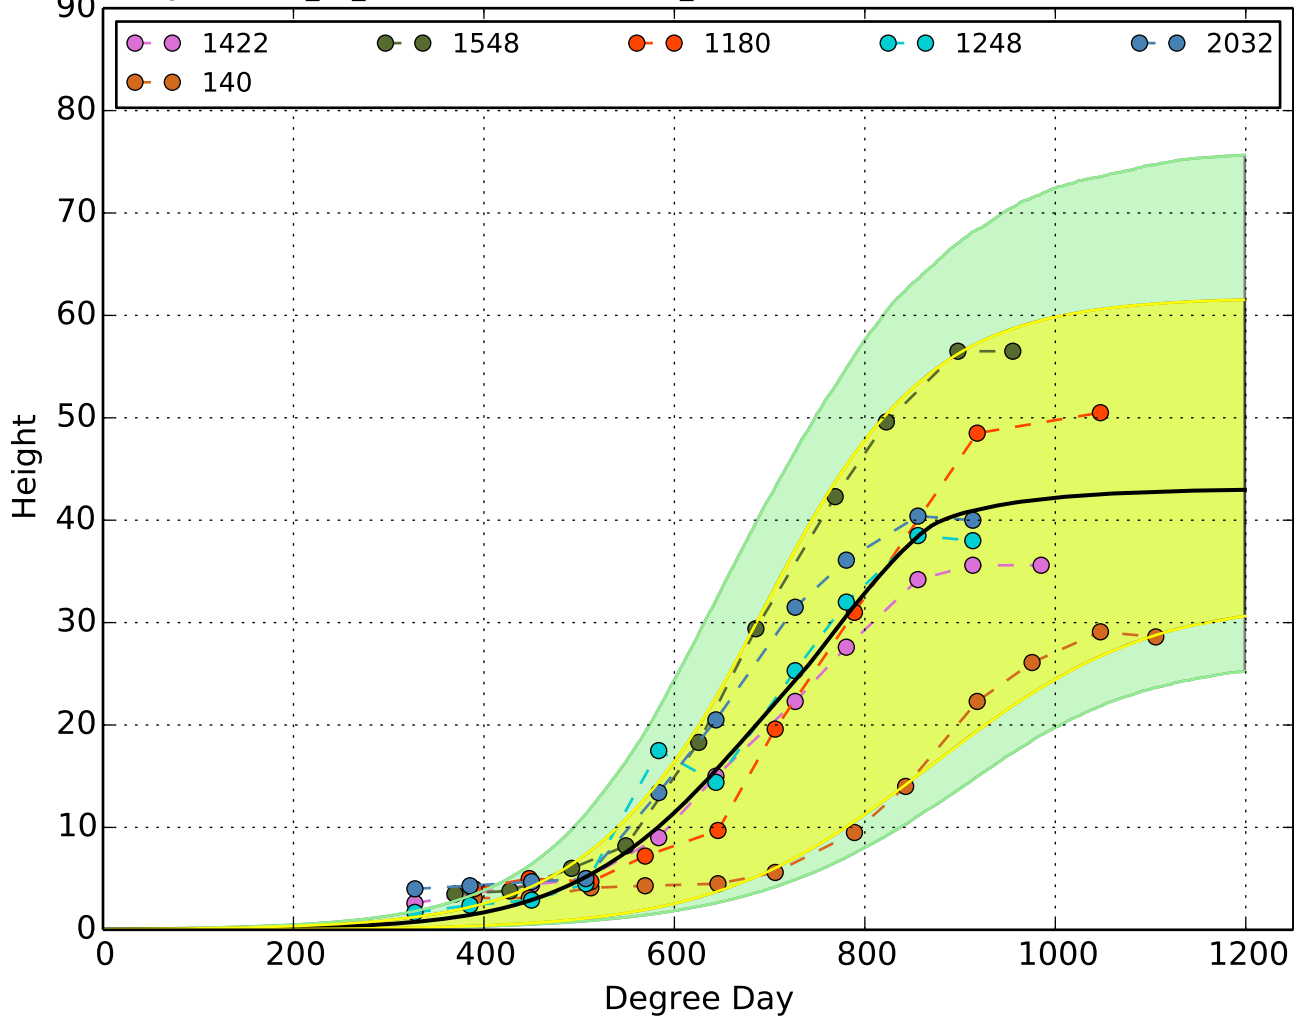

HeightModel3\_v1\_ResErrModel,Treat= CR\_2012,Line 193 (#Inv=8);95CI GrowthCurves

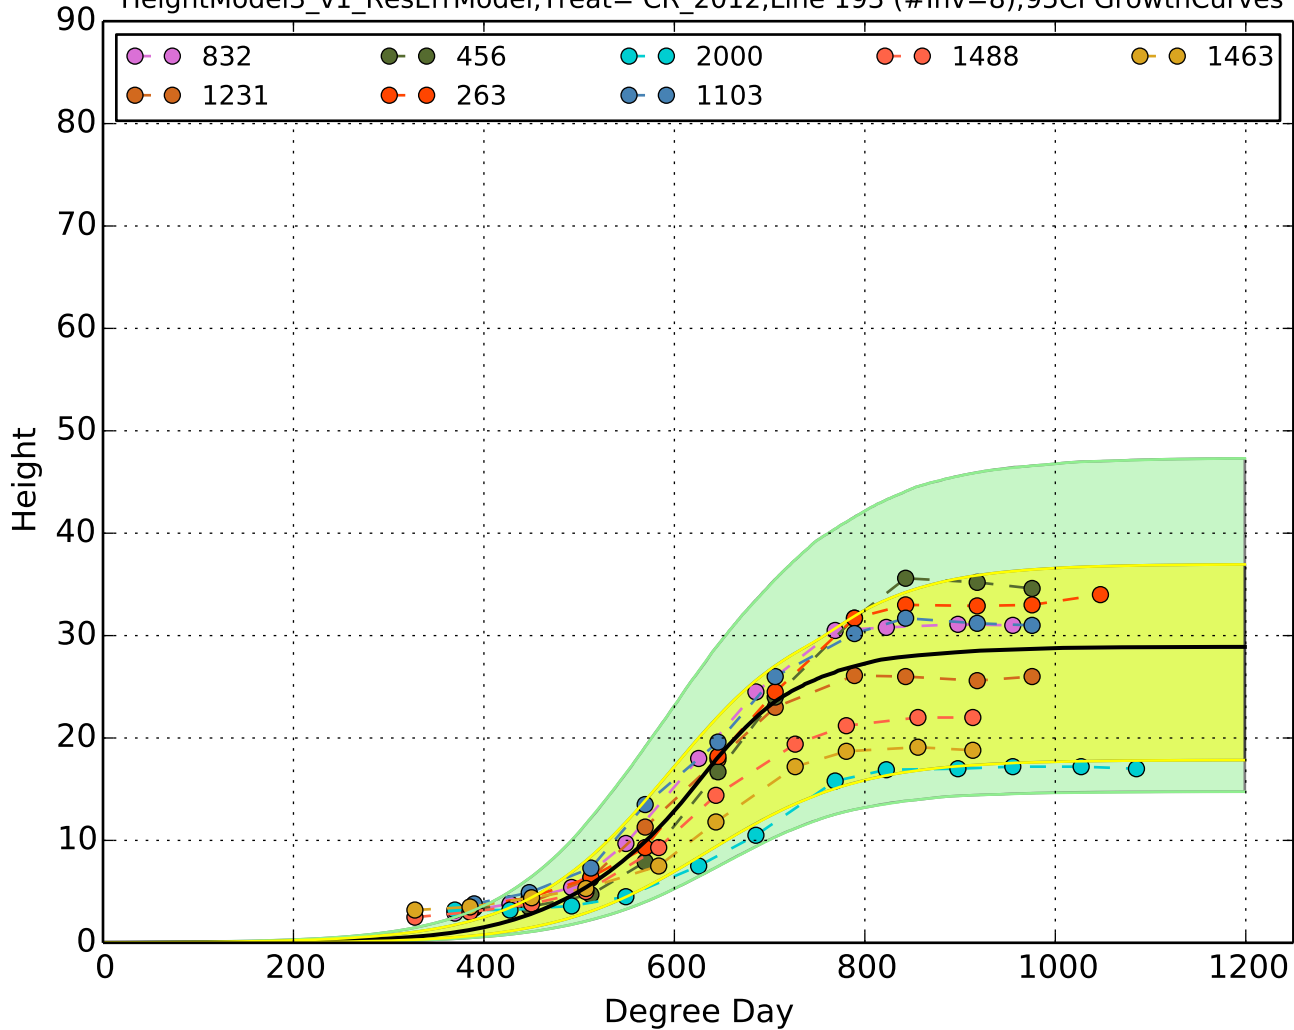

HeightModel3\_v1\_ResErrModel,Treat= CR\_2012,Line 198 (#Inv=6);95CI GrowthCurves

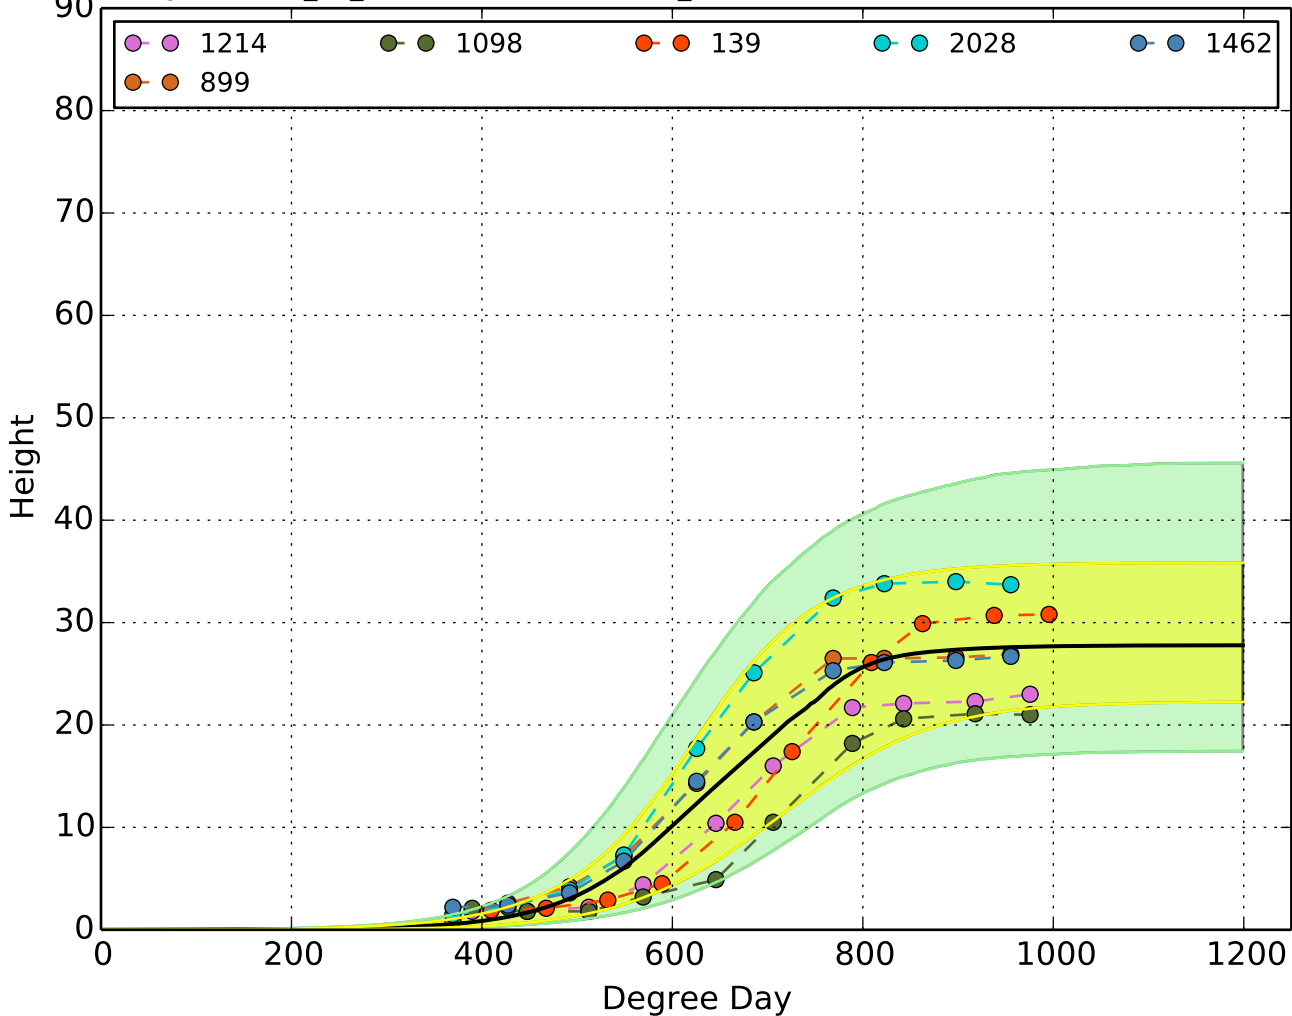

HeightModel3\_v1\_ResErrModel,Treat= CR\_2012,Line 199 (#Inv=7);95CI GrowthCurves

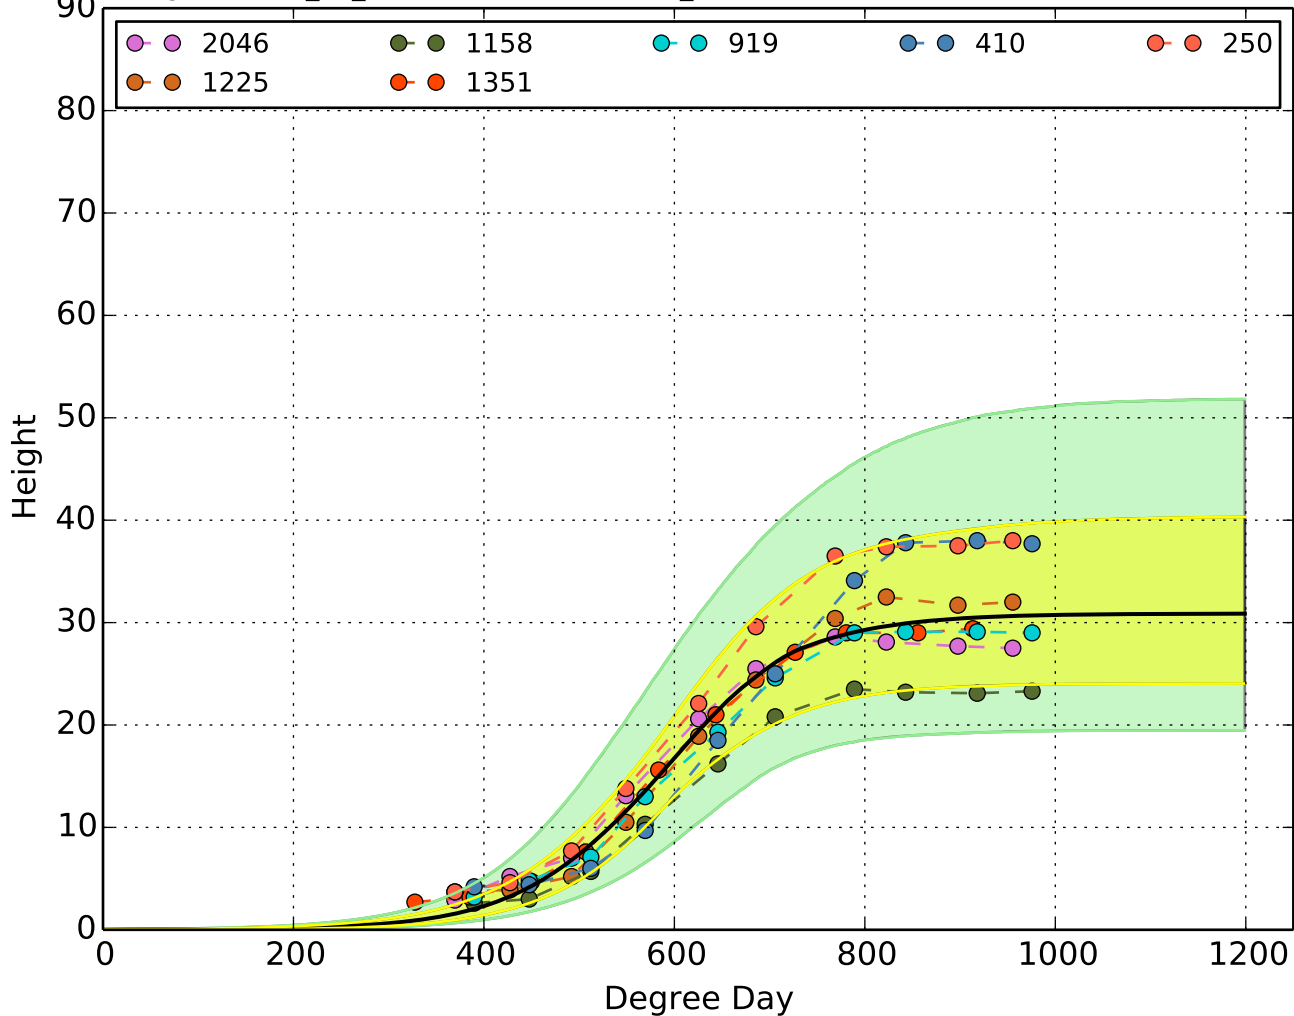

HeightModel3\_v1\_ResErrModel,Treat= CR\_2012,Line 201 (#Inv=8);95CI GrowthCurves

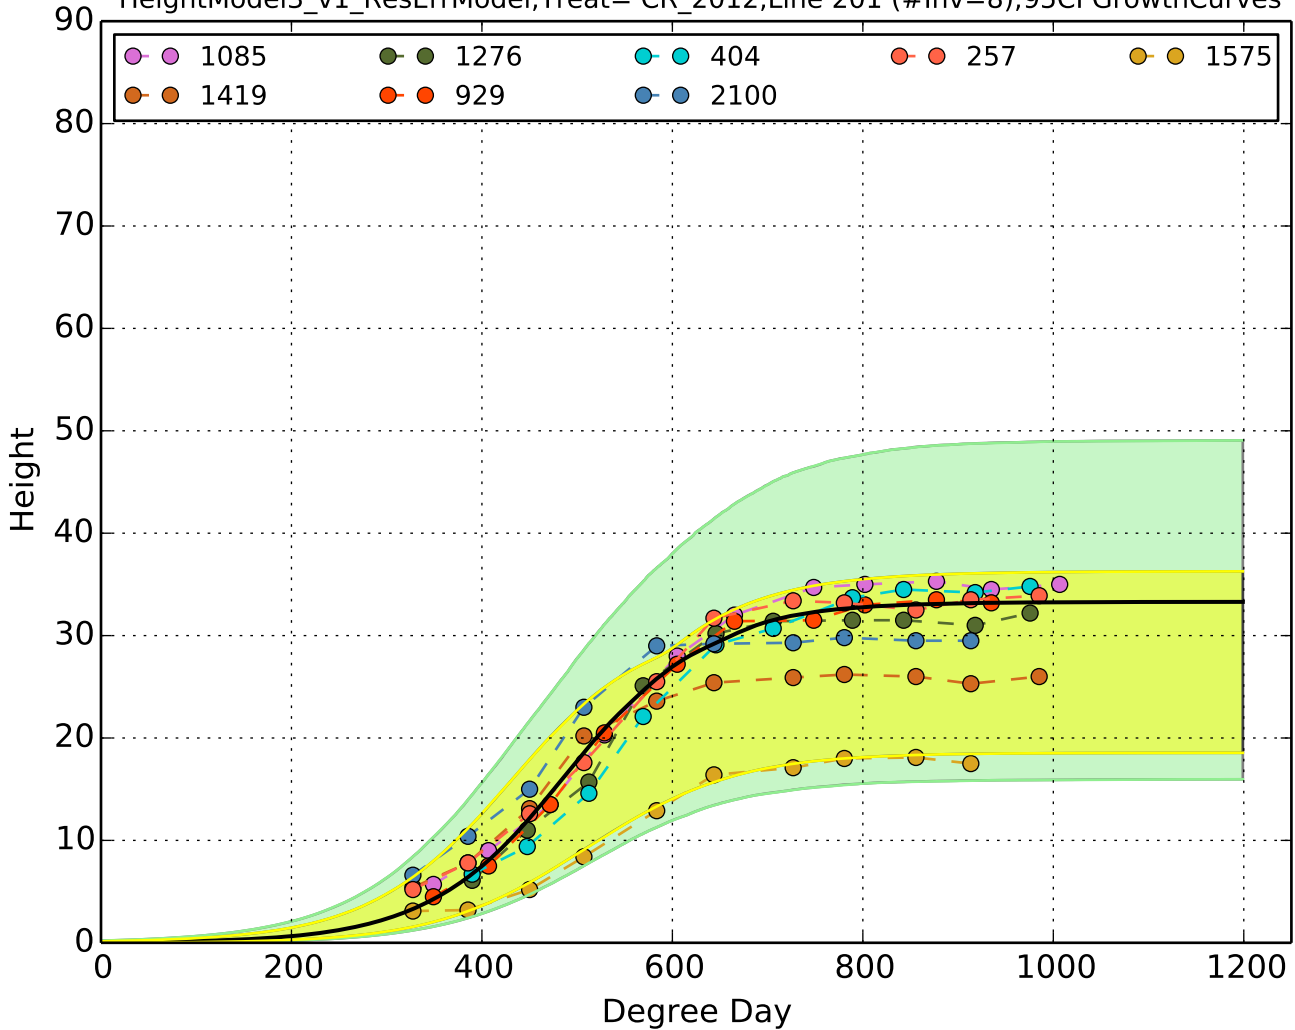

HeightModel3\_v1\_ResErrModel,Treat= CR\_2012,Line 204 (#Inv=6);95CI GrowthCurves

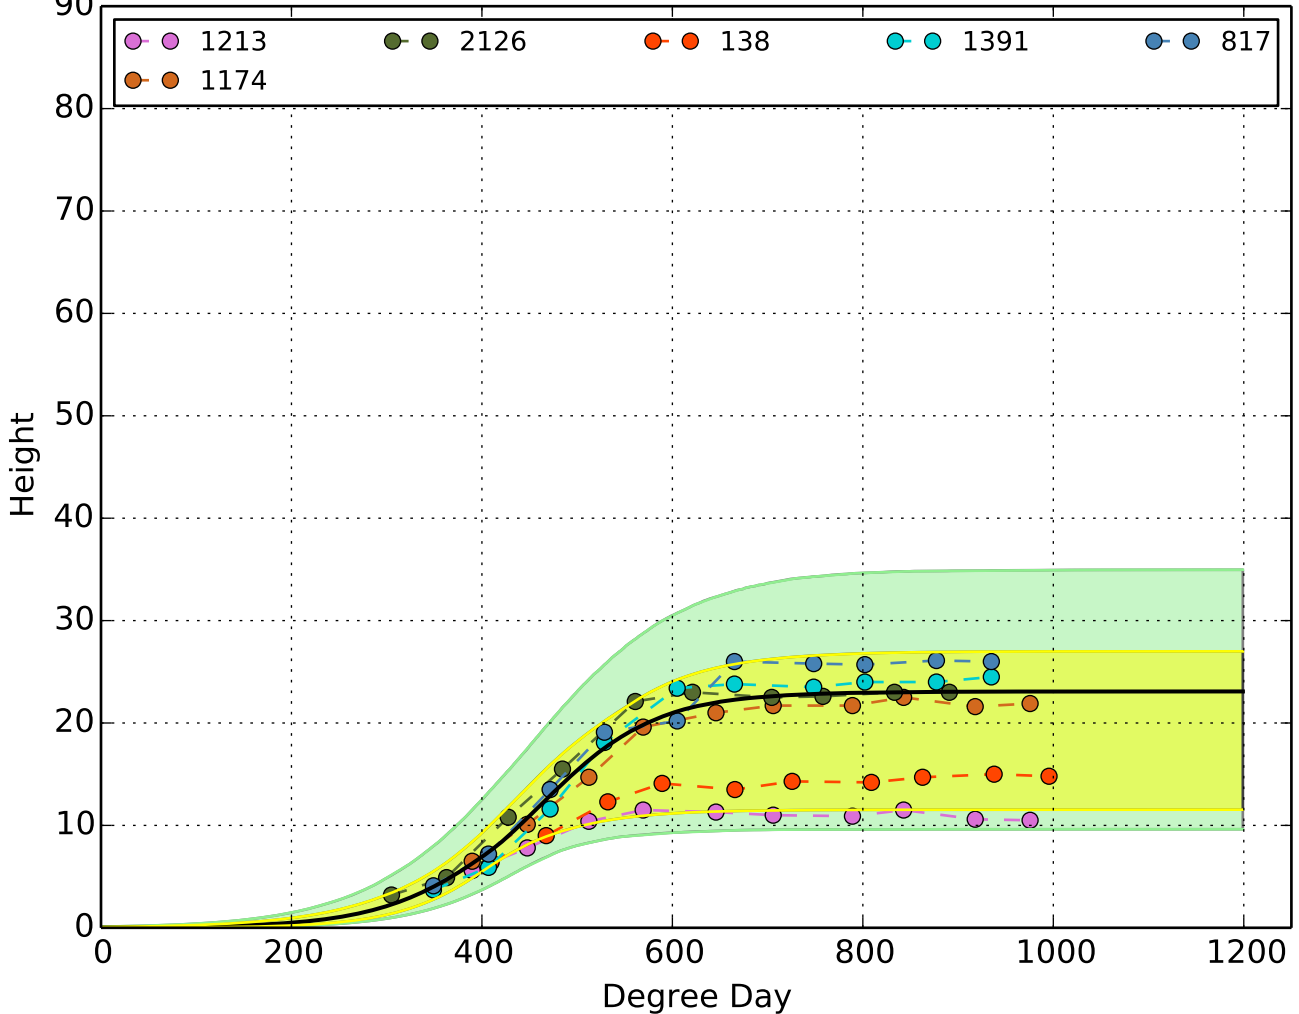



HeightModel3\_v1\_ResErrModel,Treat= CR\_2012,Line 205 (#Inv=6);95CI GrowthCurves

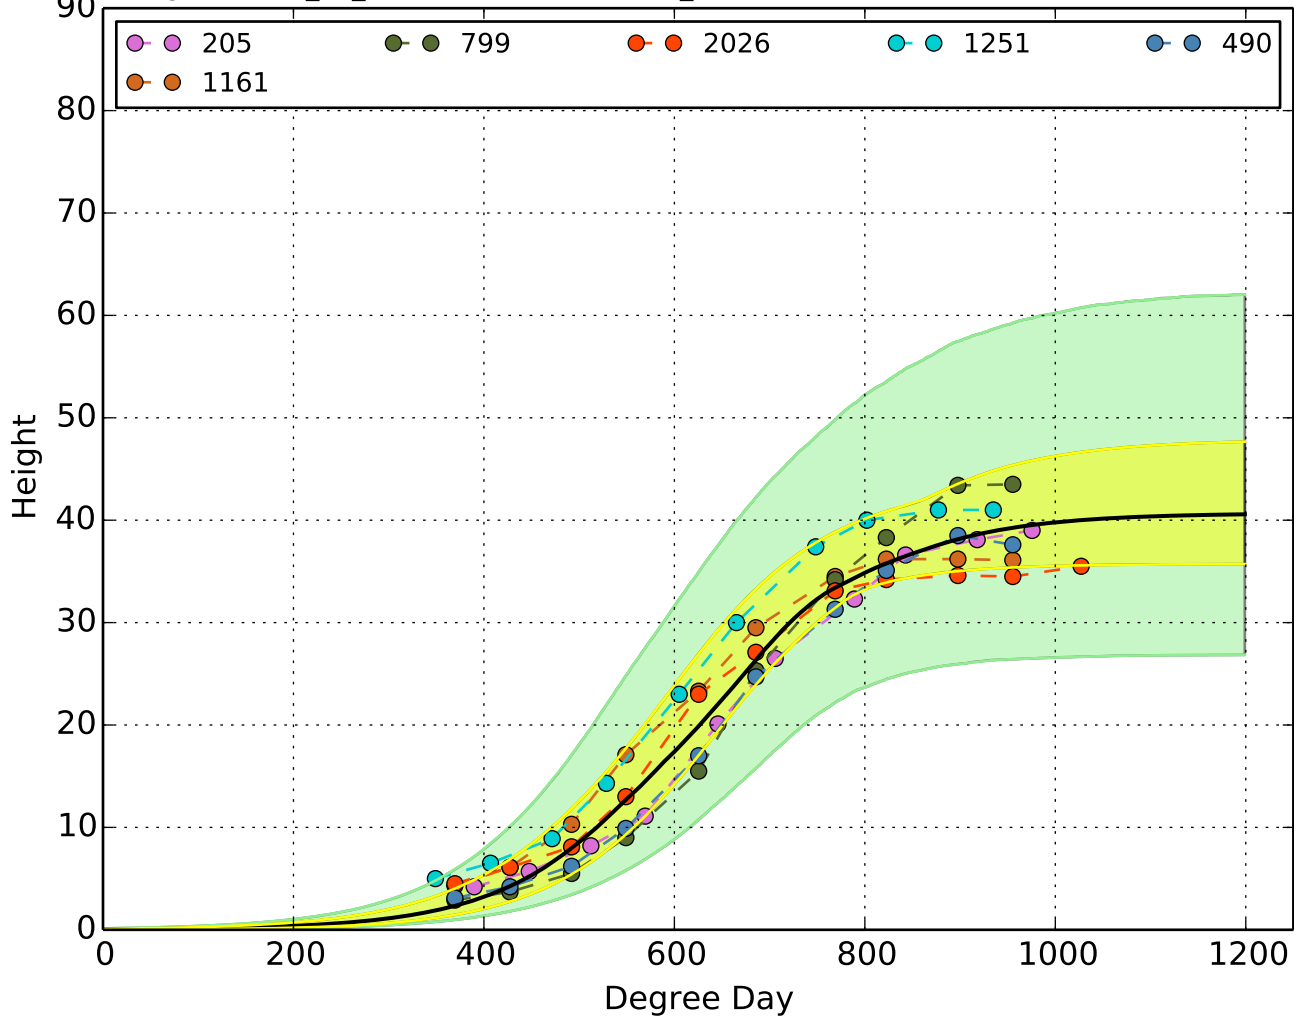

HeightModel3\_v1\_ResErrModel,Treat= CR\_2012,Line 206 (#Inv=7);95CI GrowthCurves

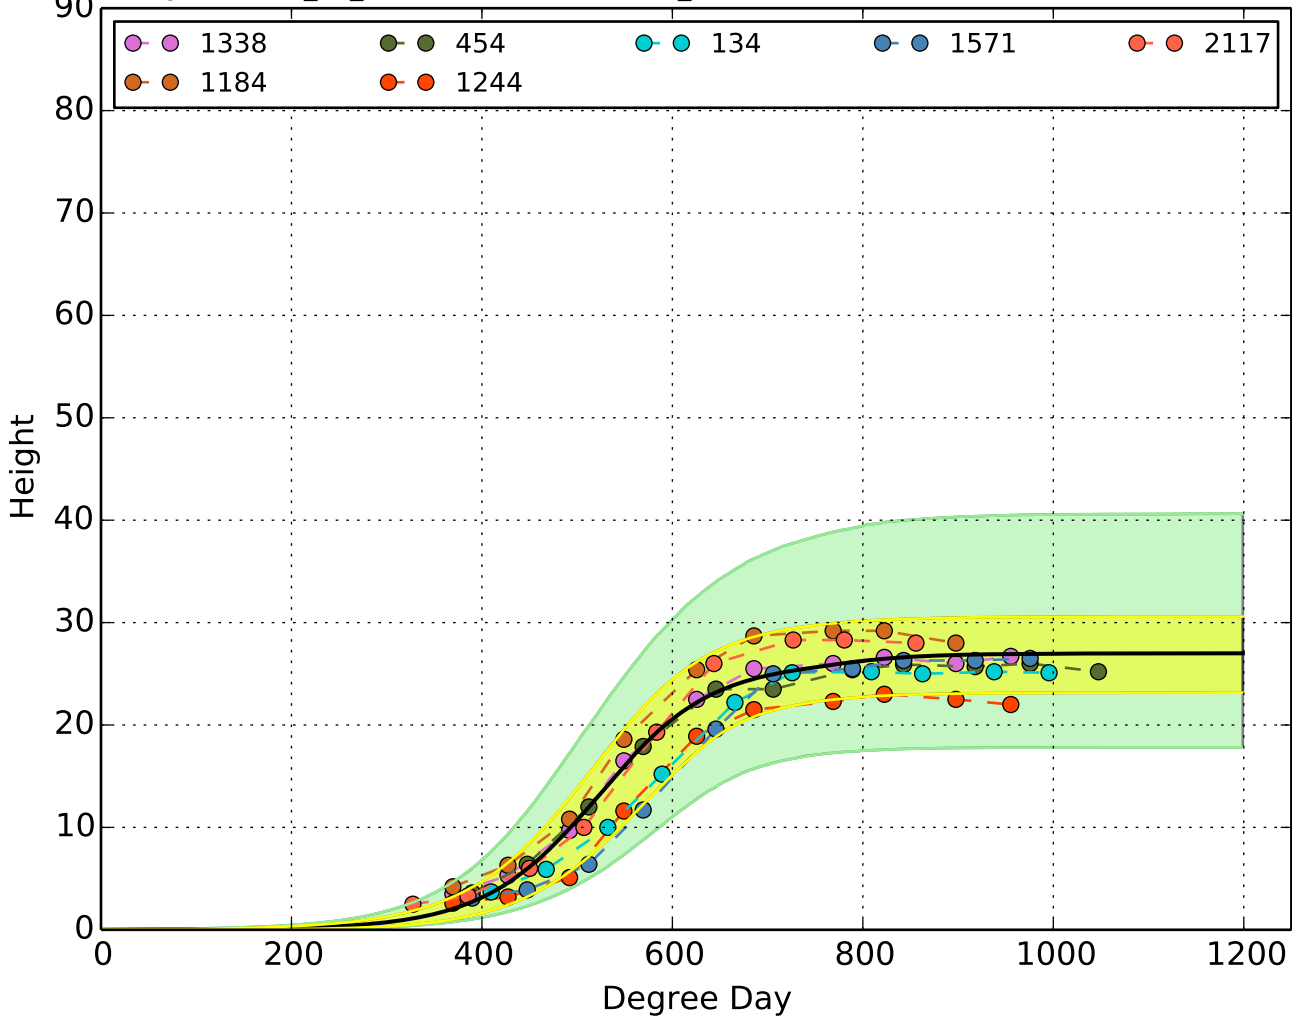

HeightModel3\_v1\_ResErrModel,Treat= CR\_2012,Line 207 (#Inv=6);95CI GrowthCurves

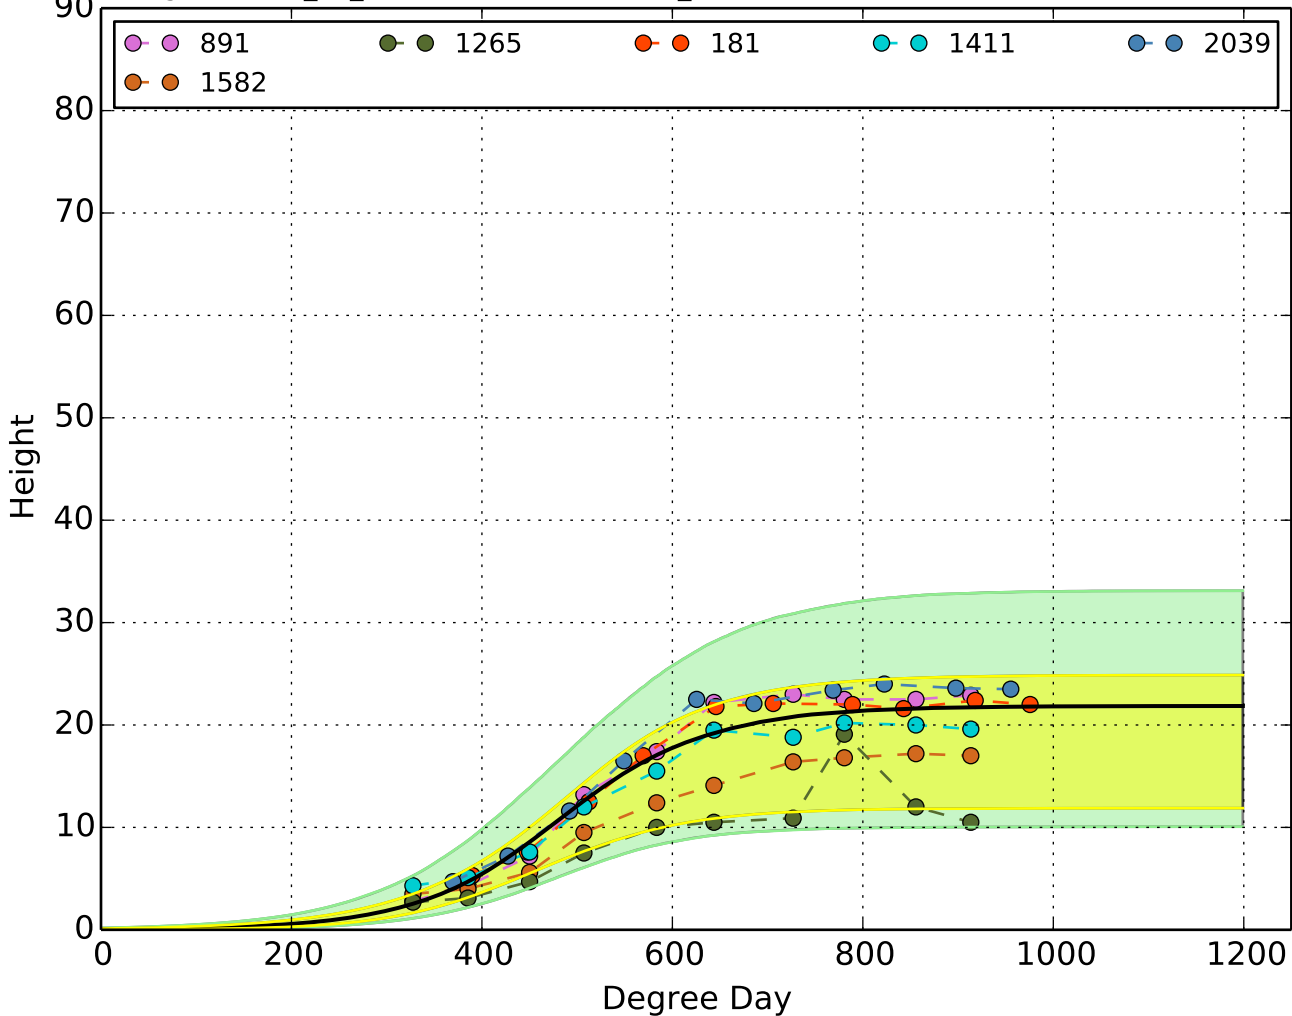

HeightModel3\_v1\_ResErrModel,Treat= CR\_2012,Line 208 (#Inv=7);95CI GrowthCurves

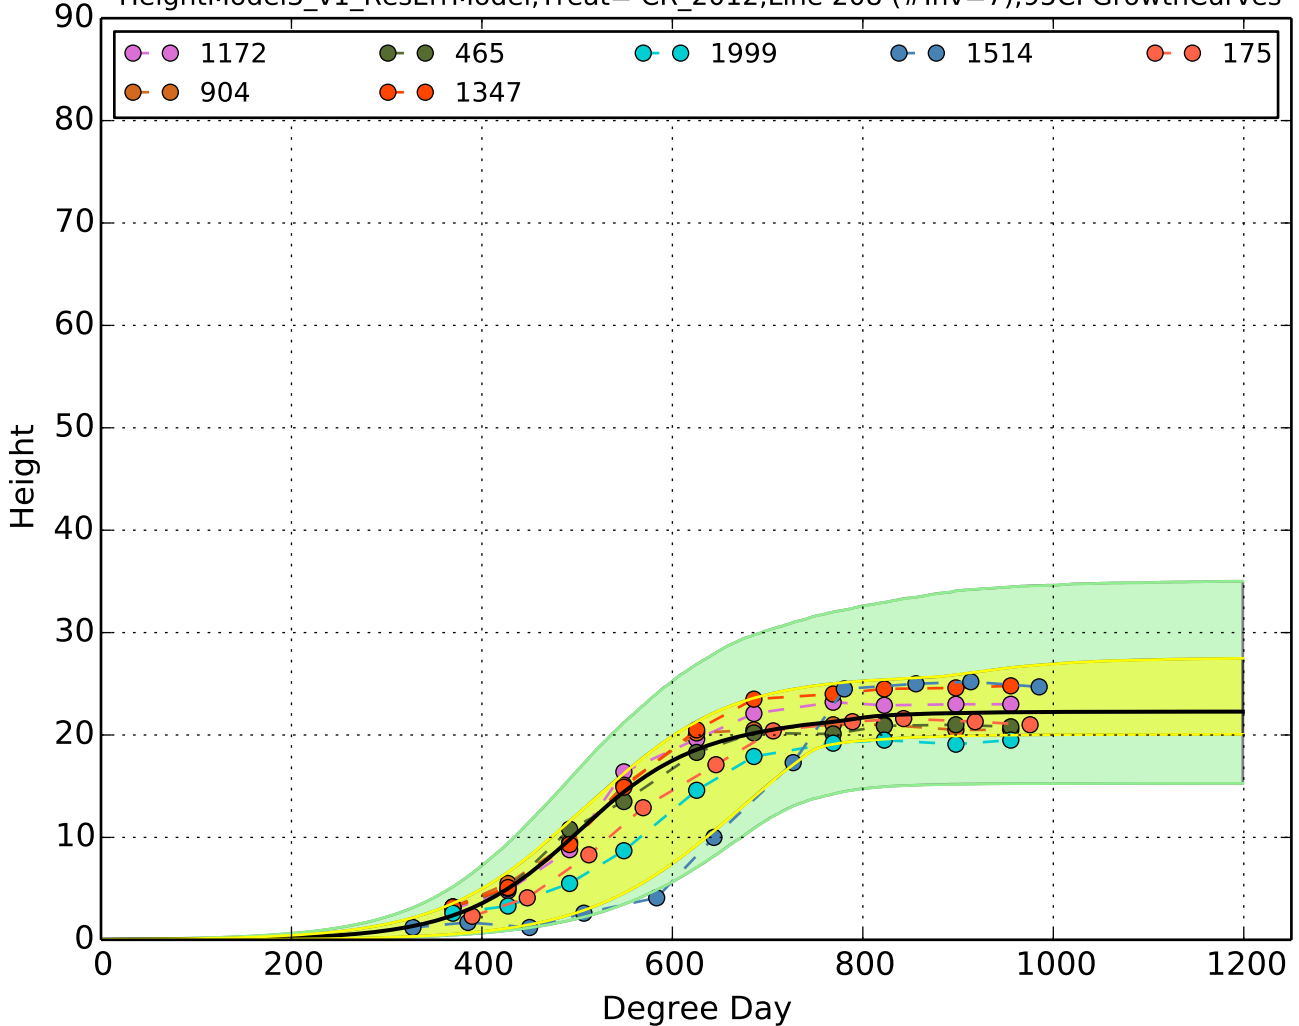

HeightModel3\_v1\_ResErrModel,Treat= CR\_2012,Line 211 (#Inv=8);95CI GrowthCurves

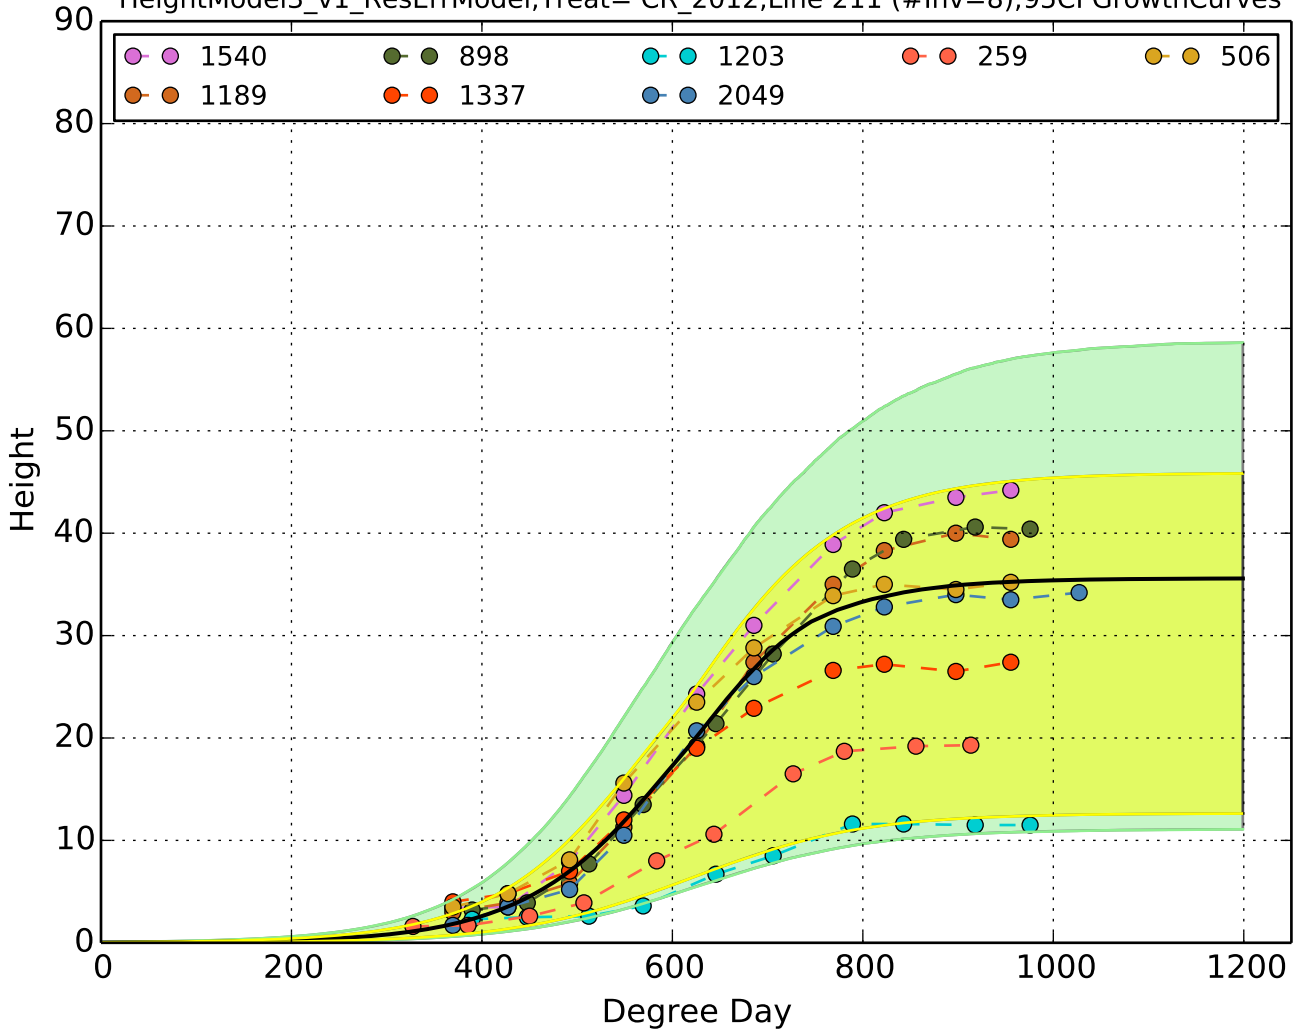

HeightModel3\_v1\_ResErrModel,Treat= CR\_2012,Line 212 (#Inv=8);95CI GrowthCurves

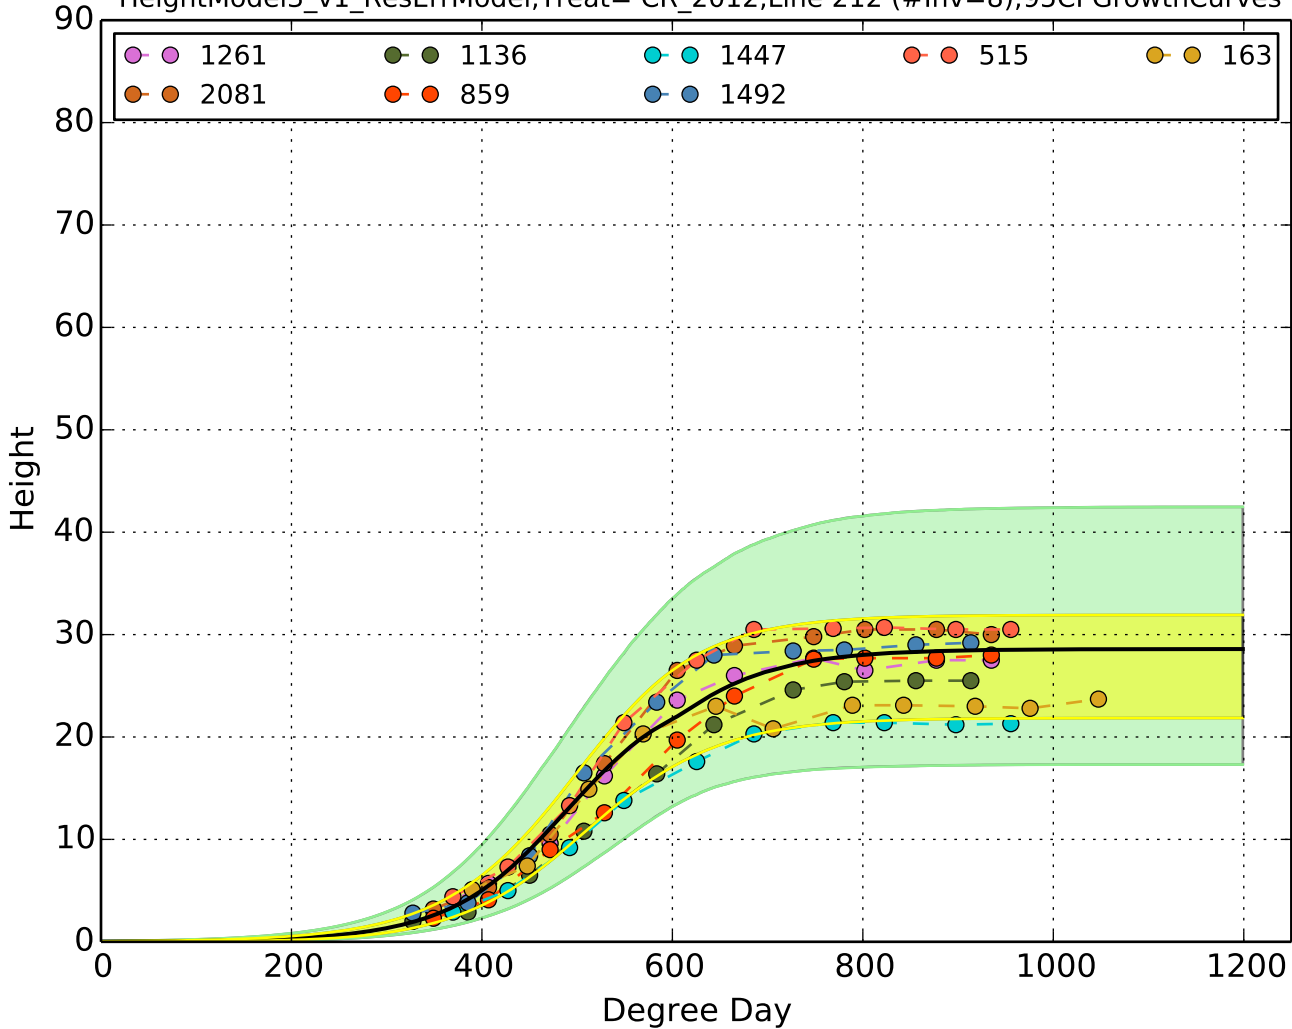

HeightModel3\_v1\_ResErrModel,Treat= CR\_2012,Line 213 (#Inv=8);95CI GrowthCurves

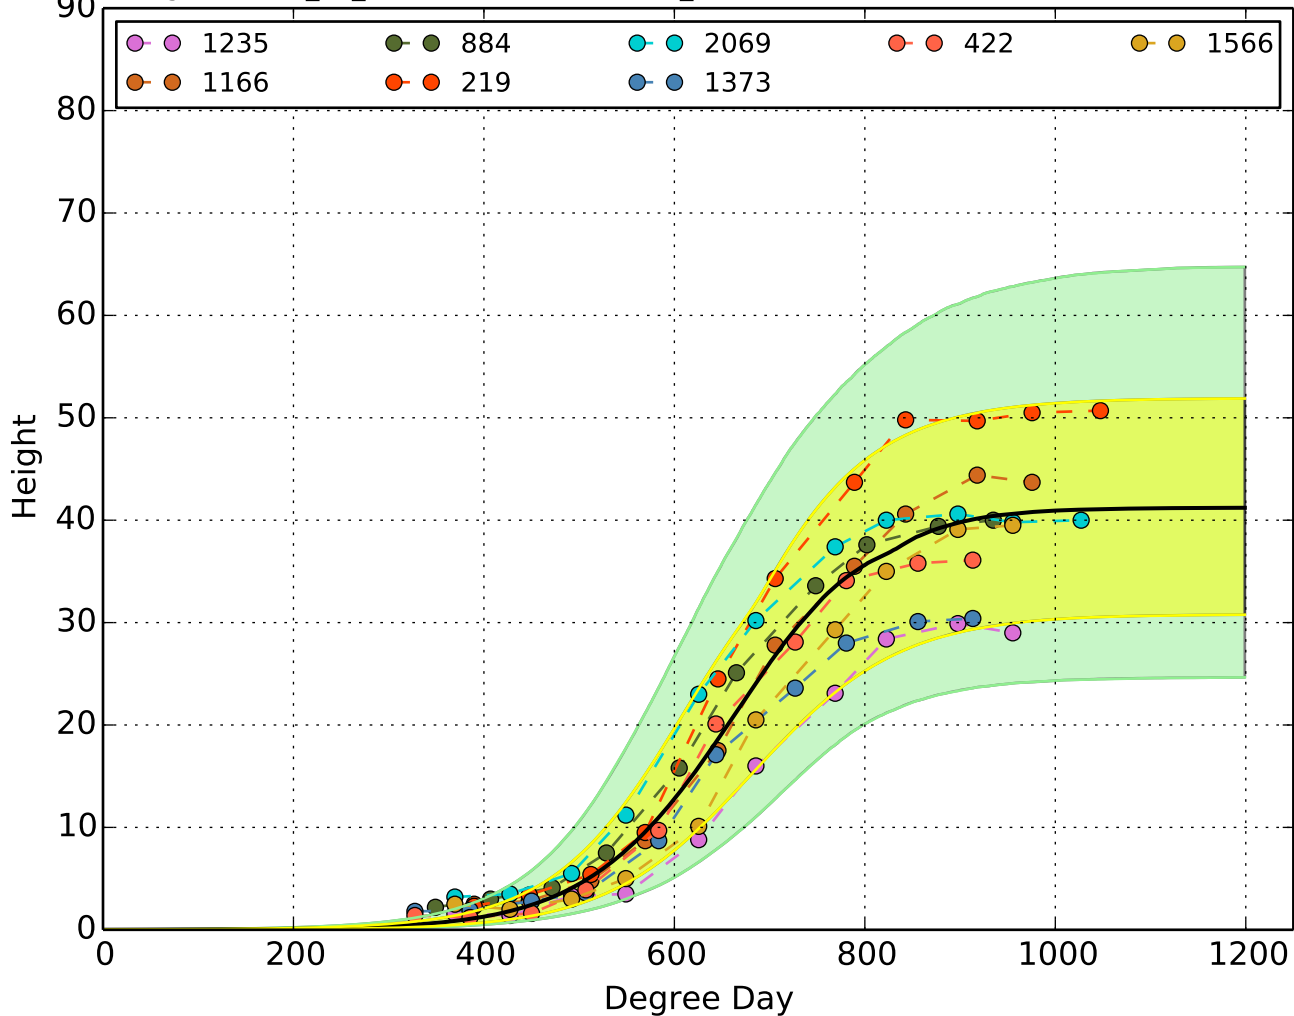

HeightModel3\_v1\_ResErrModel,Treat= CR\_2012,Line 215 (#Inv=7);95CI GrowthCurves

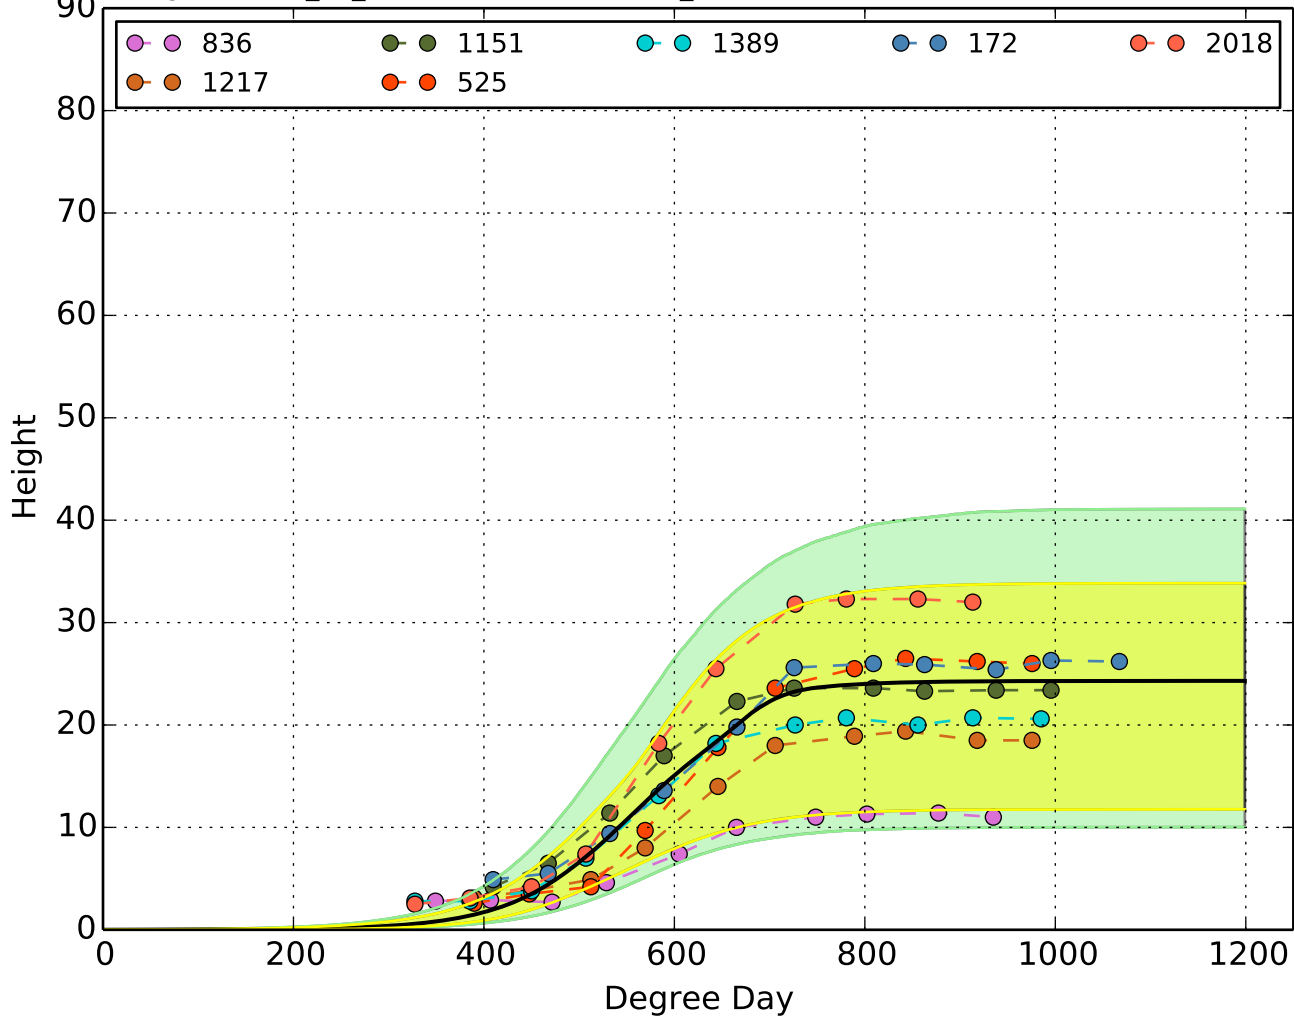



HeightModel3\_v1\_ResErrModel,Treat= CR\_2012,Line 222 (#Inv=8);95CI GrowthCurves

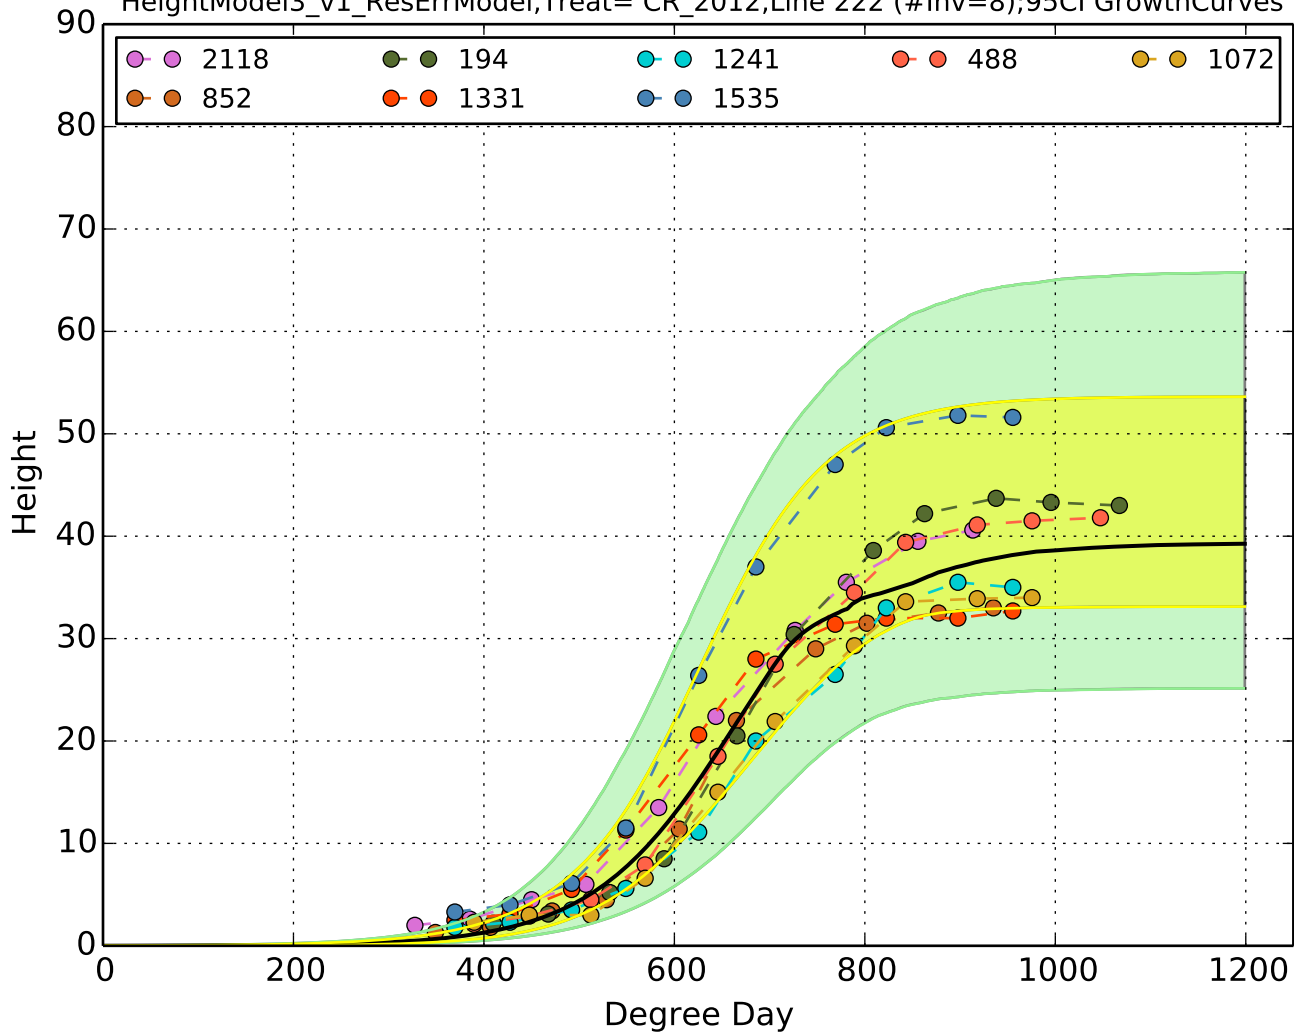

HeightModel3\_v1\_ResErrModel,Treat= CR\_2012,Line 223 (#Inv=6);95CI GrowthCurves

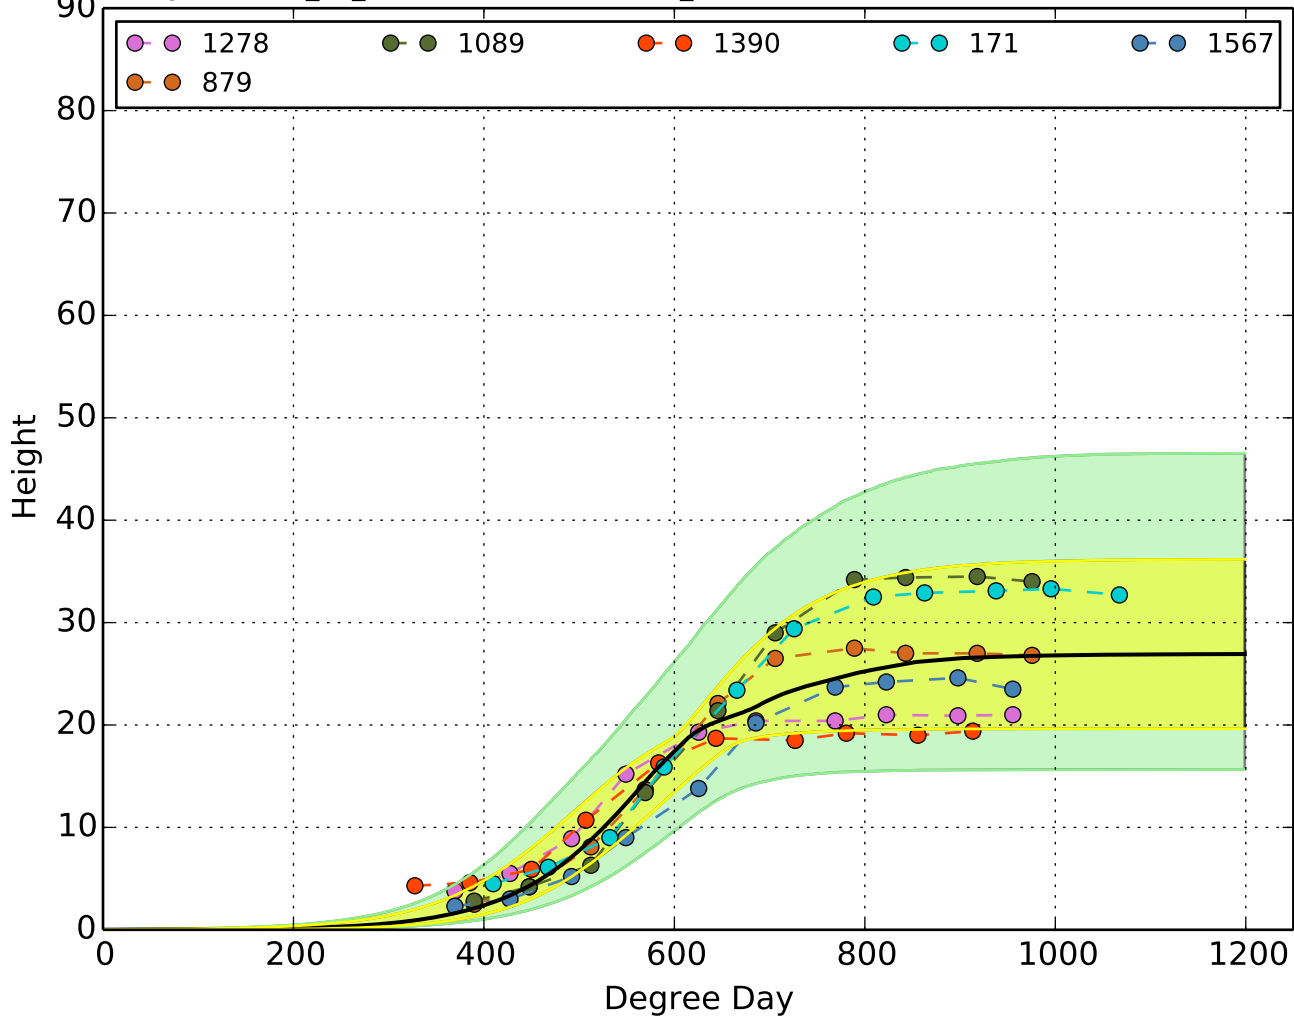

HeightModel3\_v1\_ResErrModel,Treat= CR\_2012,Line 225 (#Inv=8);95CI GrowthCurves

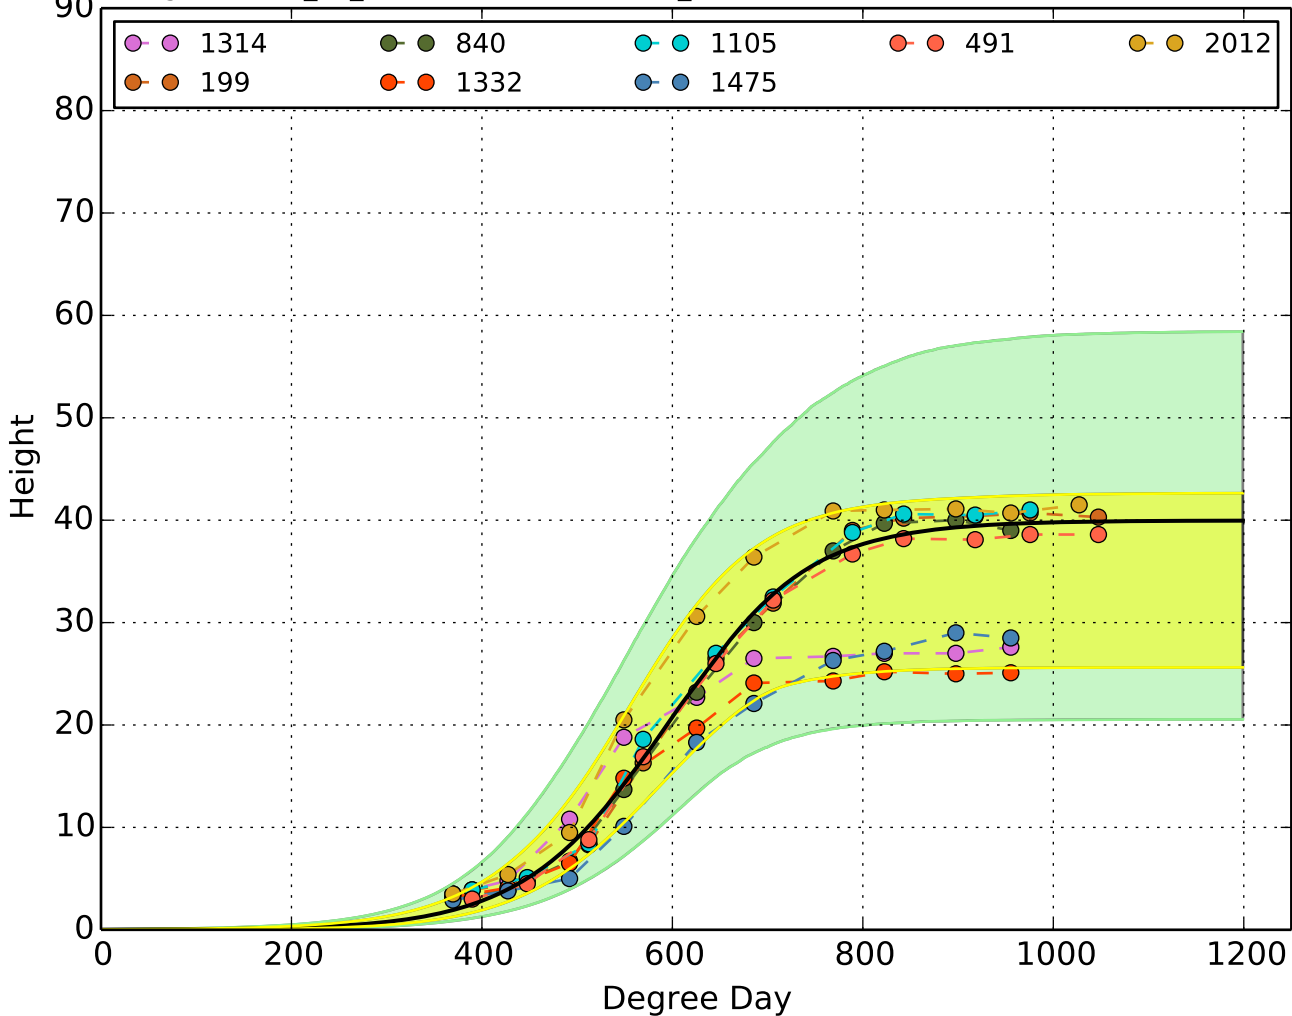

HeightModel3\_v1\_ResErrModel,Treat= CR\_2012,Line 228 (#Inv=7);95CI GrowthCurves

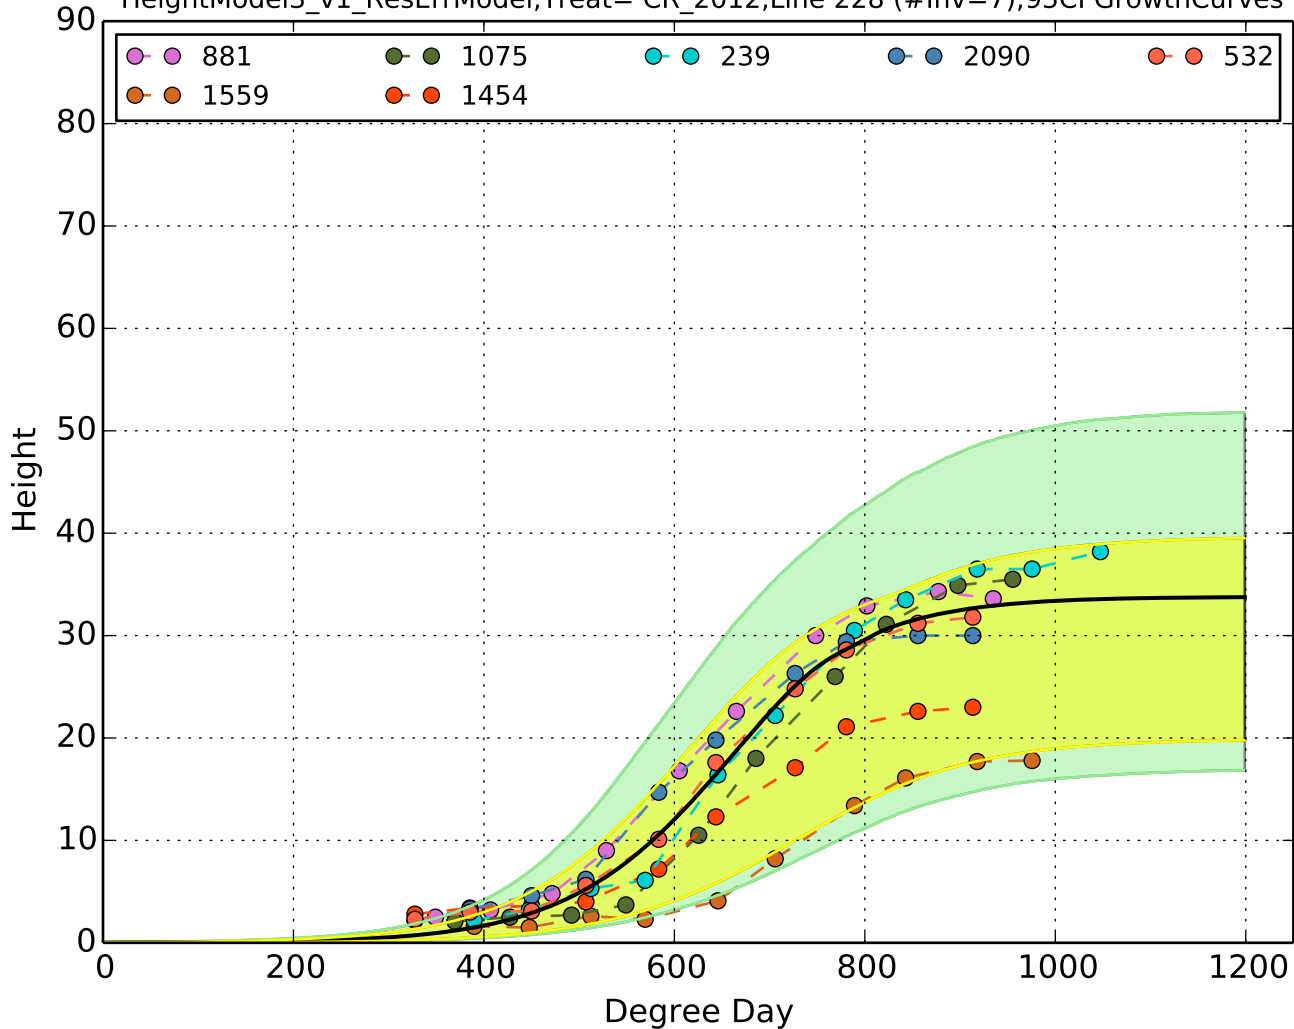

HeightModel3\_v1\_ResErrModel,Treat= CR\_2012,Line 229 (#Inv=7);95CI GrowthCurves

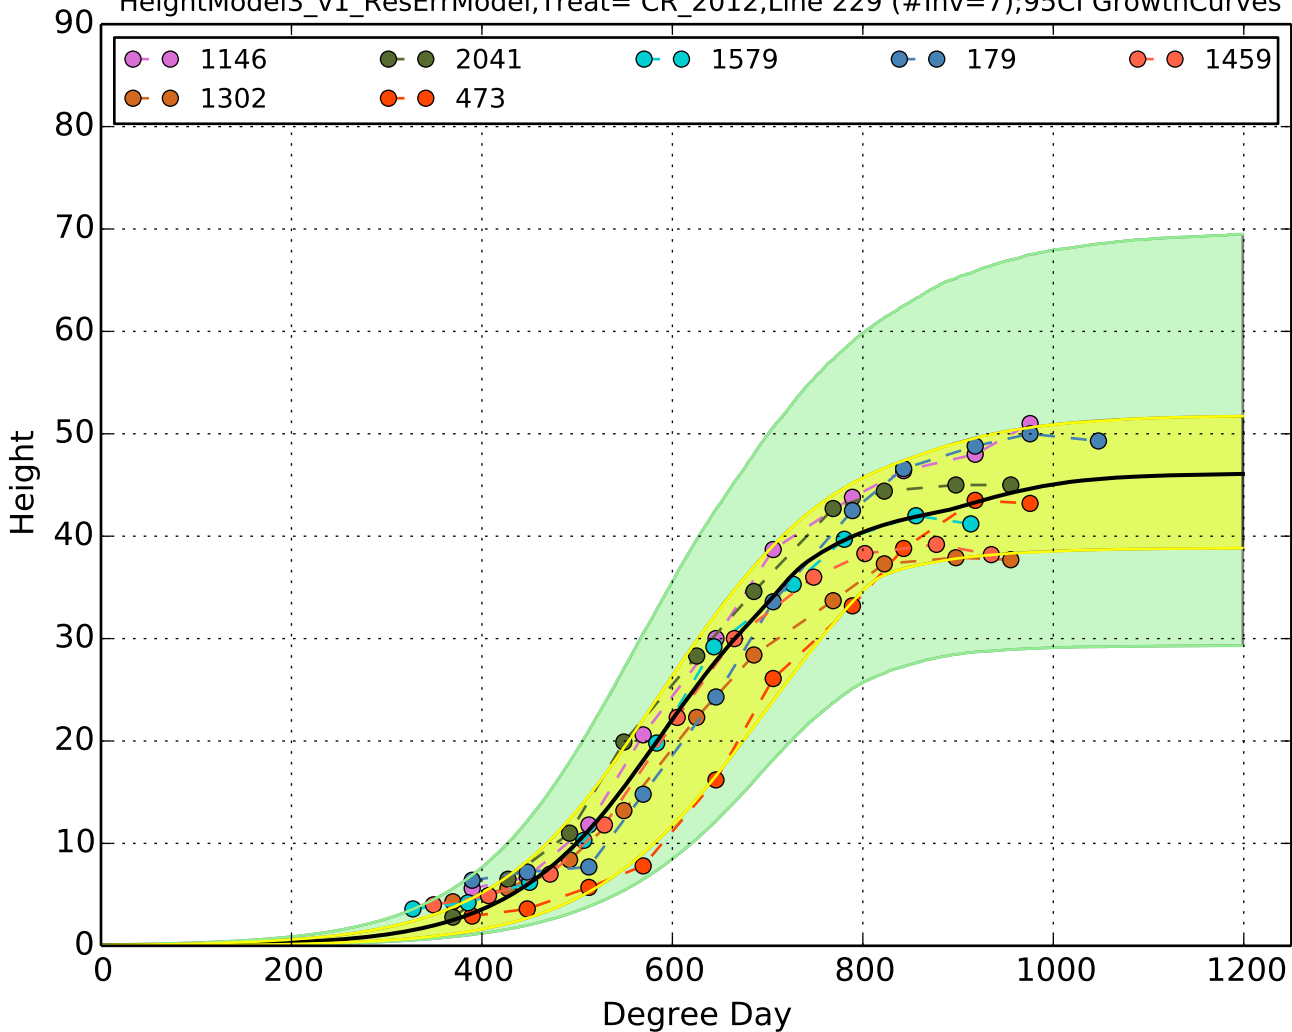

HeightModel3\_v1\_ResErrModel,Treat= CR\_2012,Line 232 (#Inv=7);95CI GrowthCurves

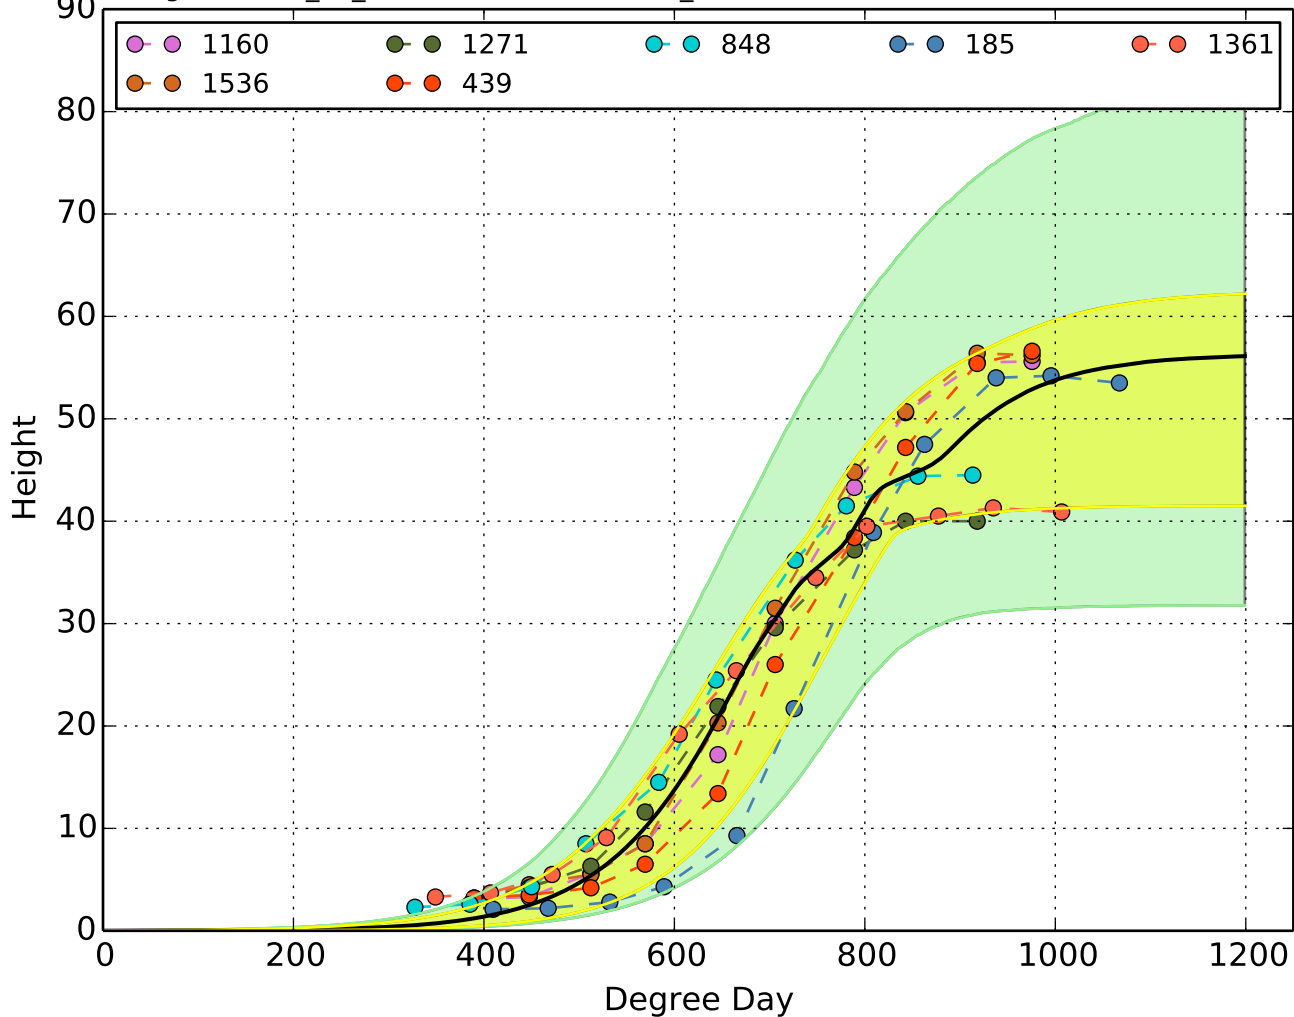

HeightModel3\_v1\_ResErrModel,Treat= CR\_2012,Line 234 (#Inv=8);95CI GrowthCurves

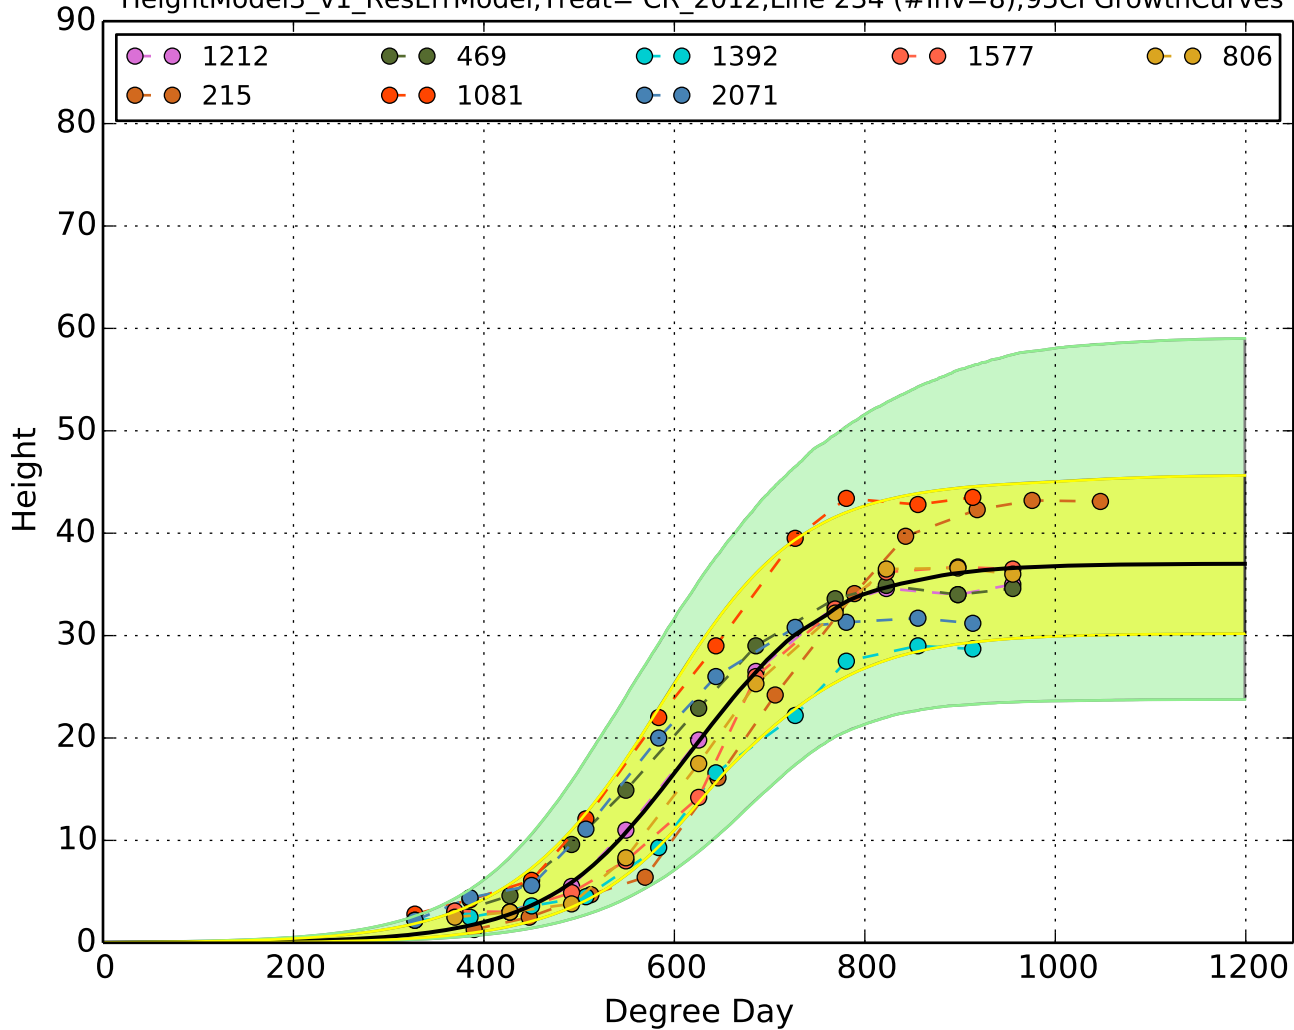

HeightModel3\_v1\_ResErrModel,Treat= CR\_2012,Line 235 (#Inv=7);95CI GrowthCurves

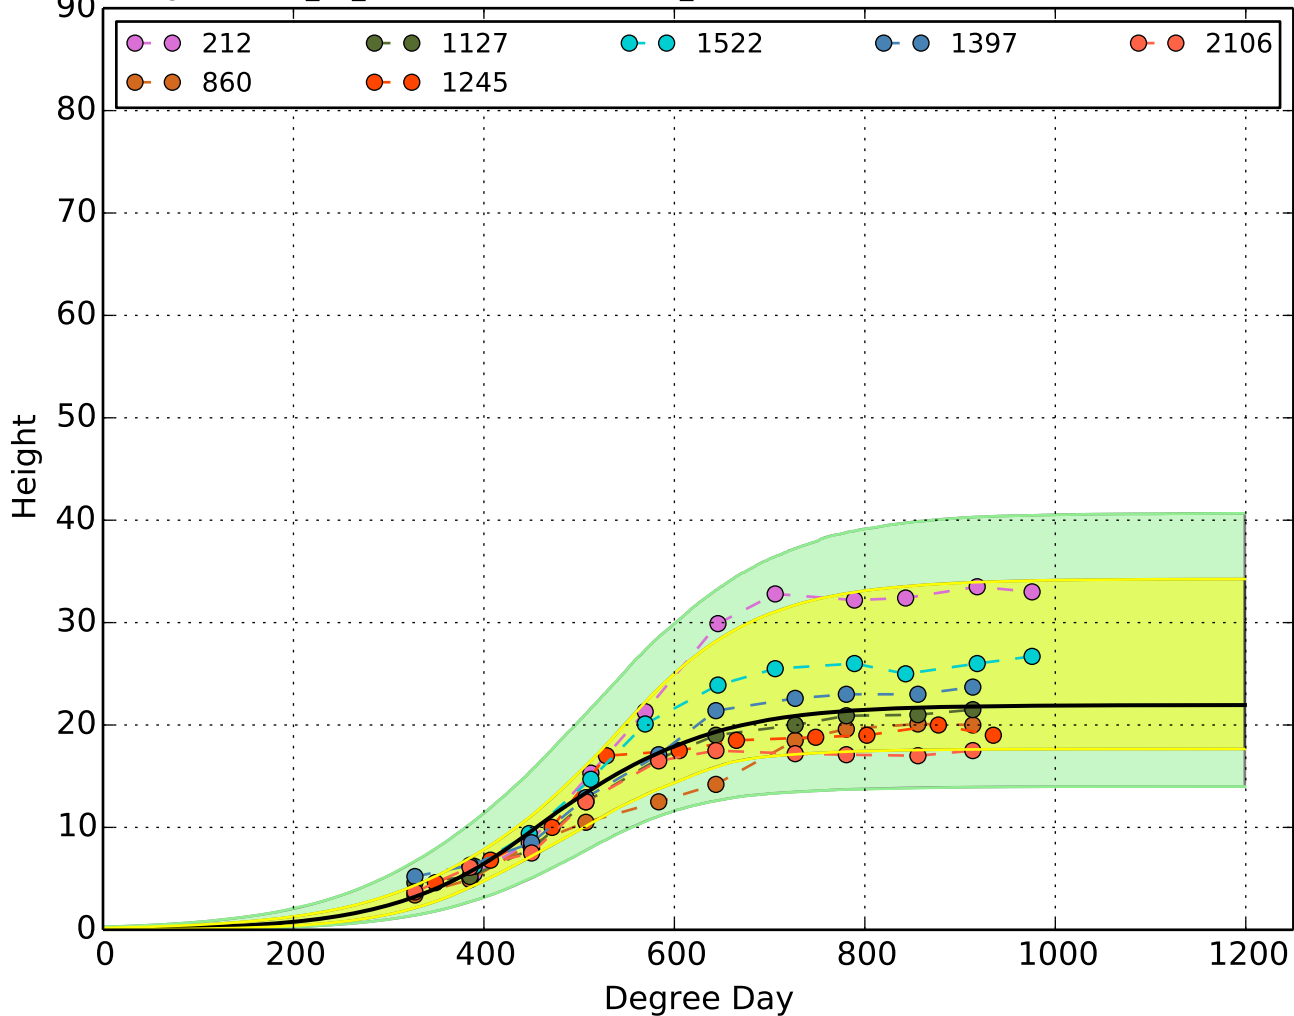



HeightModel3\_v1\_ResErrModel,Treat= CR\_2012,Line 240 (#Inv=5);95CI GrowthCurves

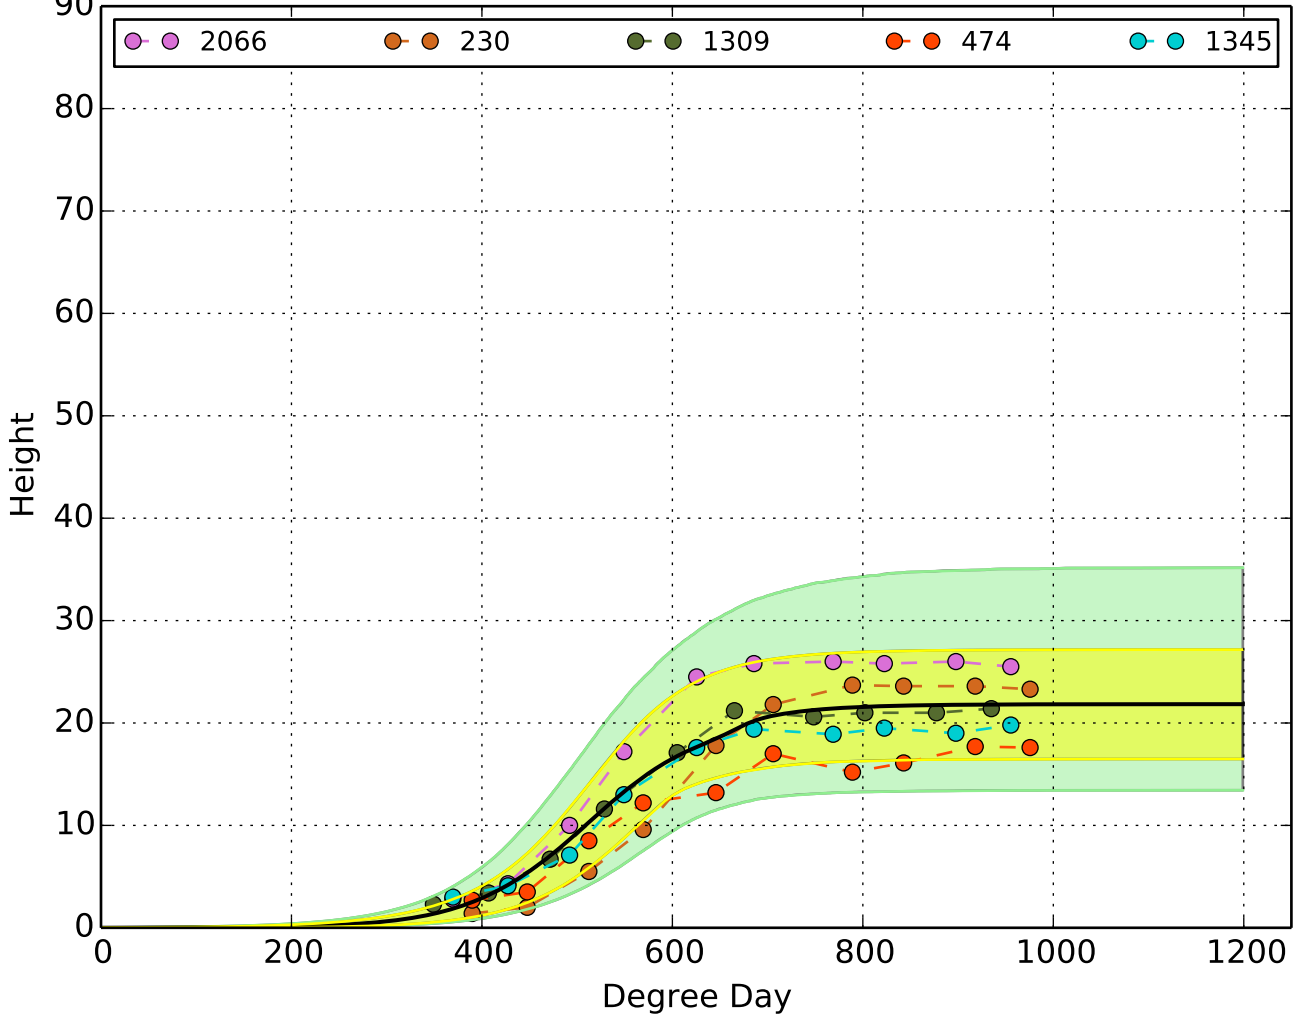

HeightModel3\_v1\_ResErrModel,Treat= CR\_2012,Line 242 (#Inv=8);95CI GrowthCurves

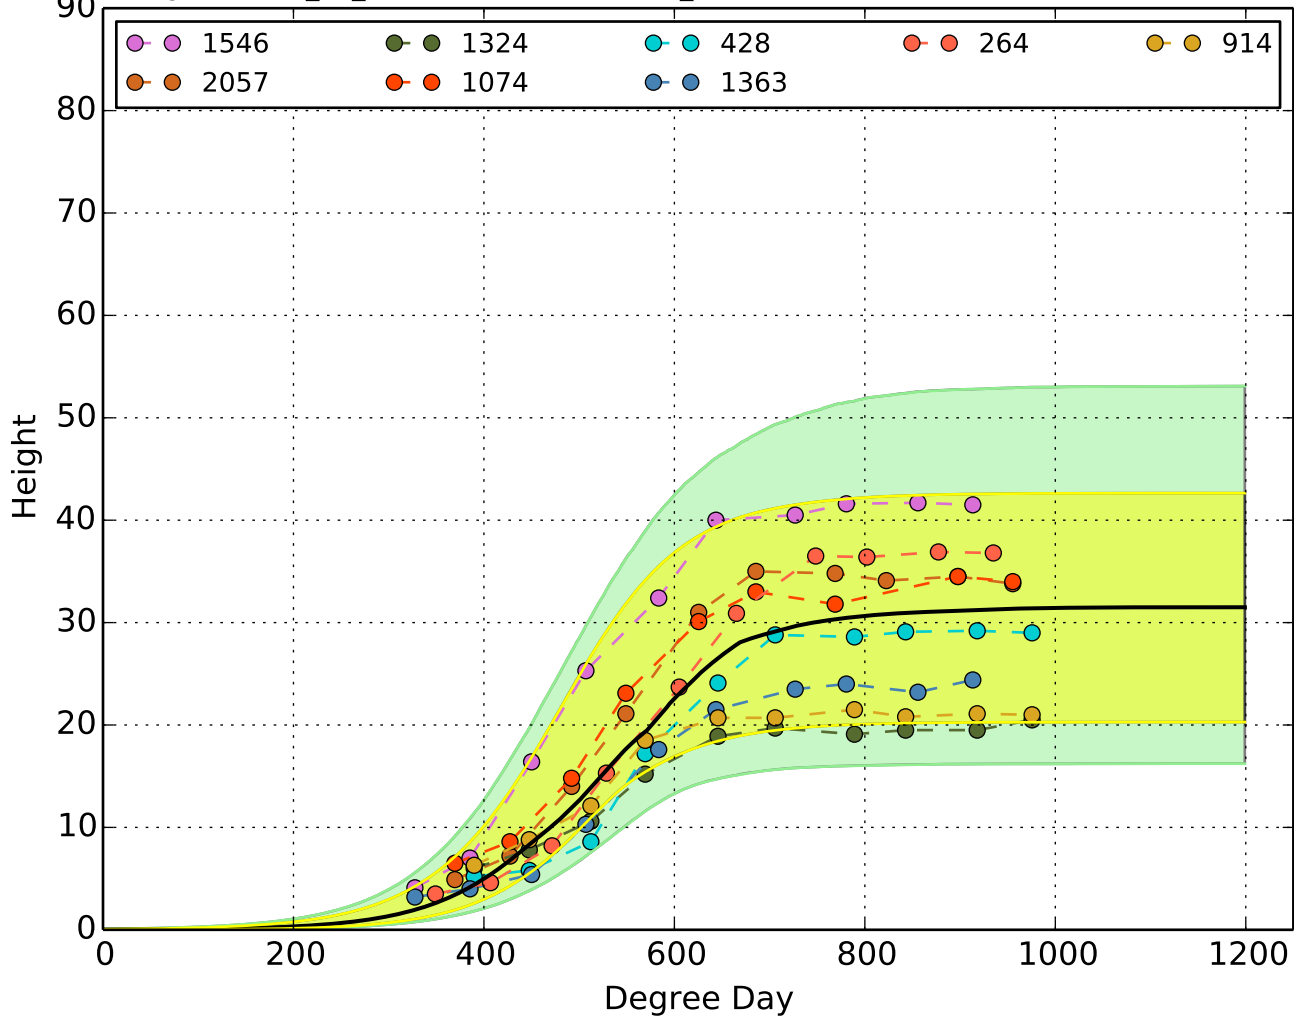

HeightModel3\_v1\_ResErrModel,Treat= CR\_2012,Line 243 (#Inv=7);95CI GrowthCurves

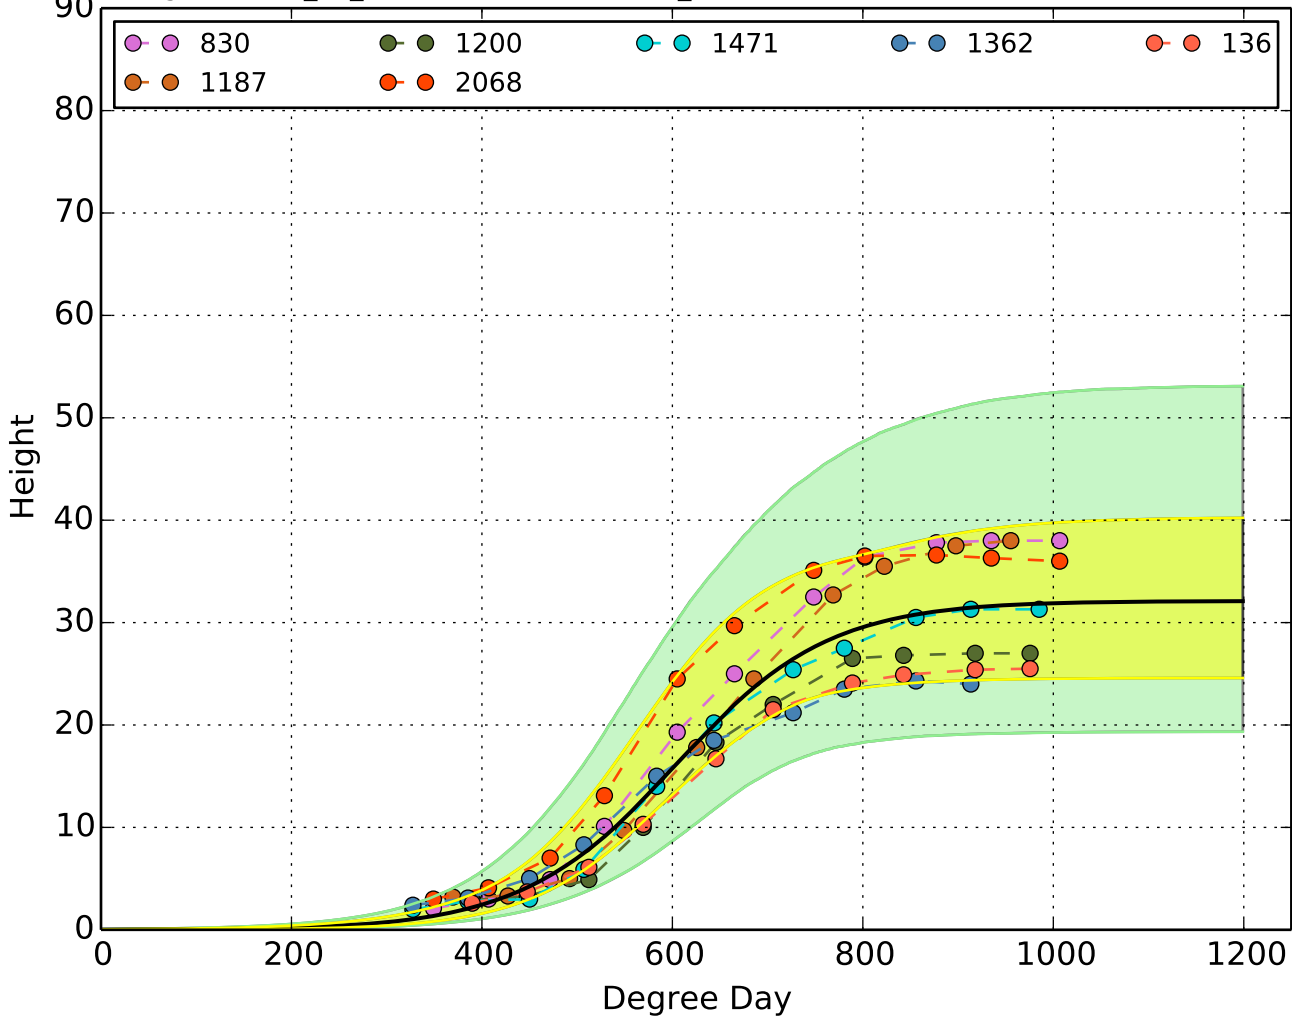

HeightModel3\_v1\_ResErrModel,Treat= CR\_2012,Line 248 (#Inv=7);95CI GrowthCurves

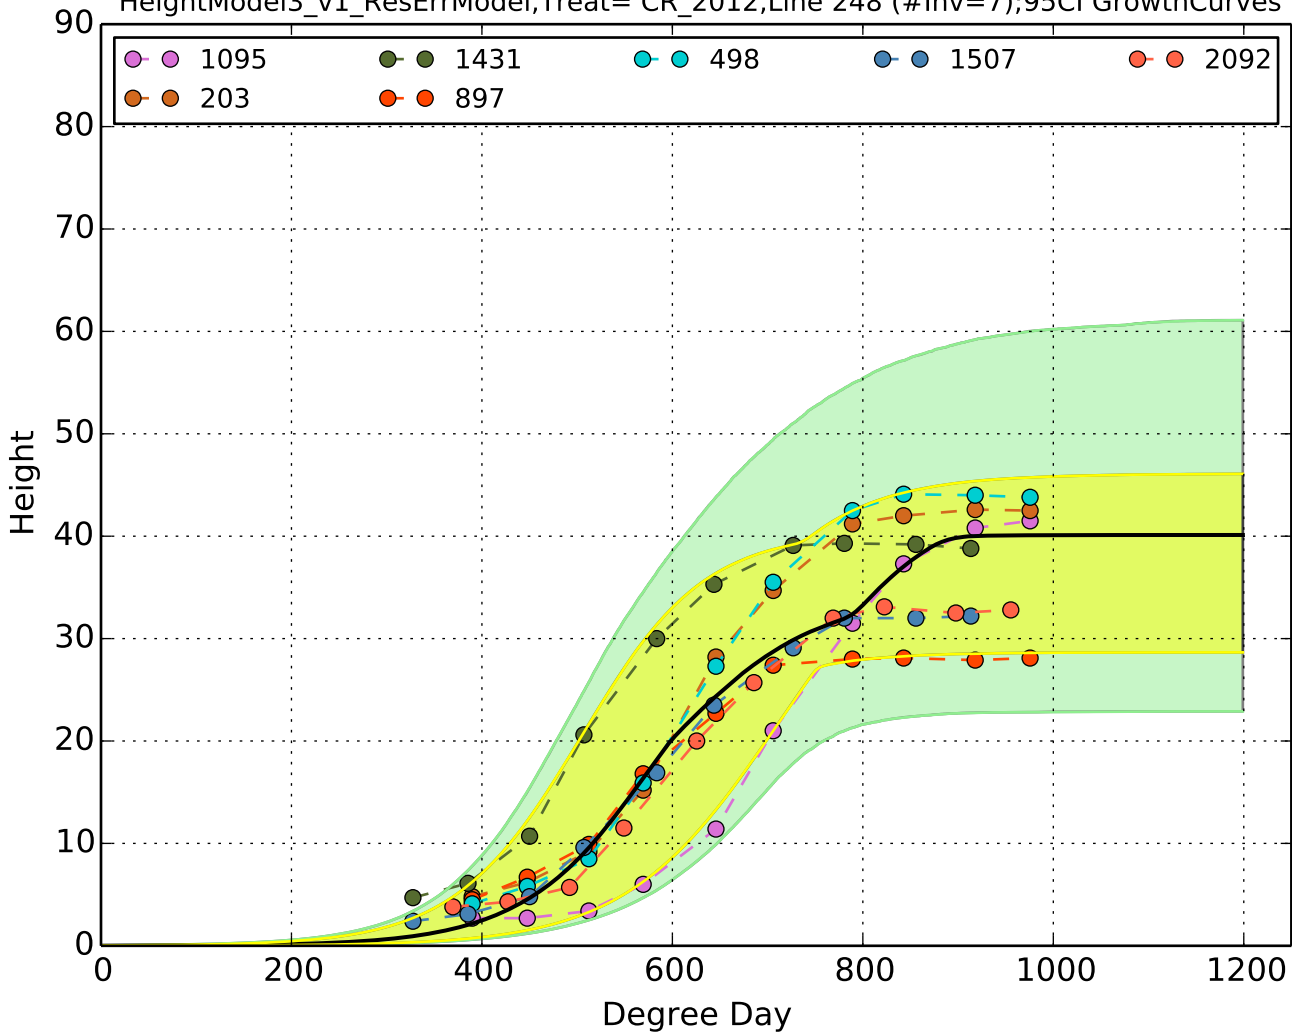

HeightModel3\_v1\_ResErrModel,Treat= CR\_2012,Line 250 (#Inv=8);95CI GrowthCurves

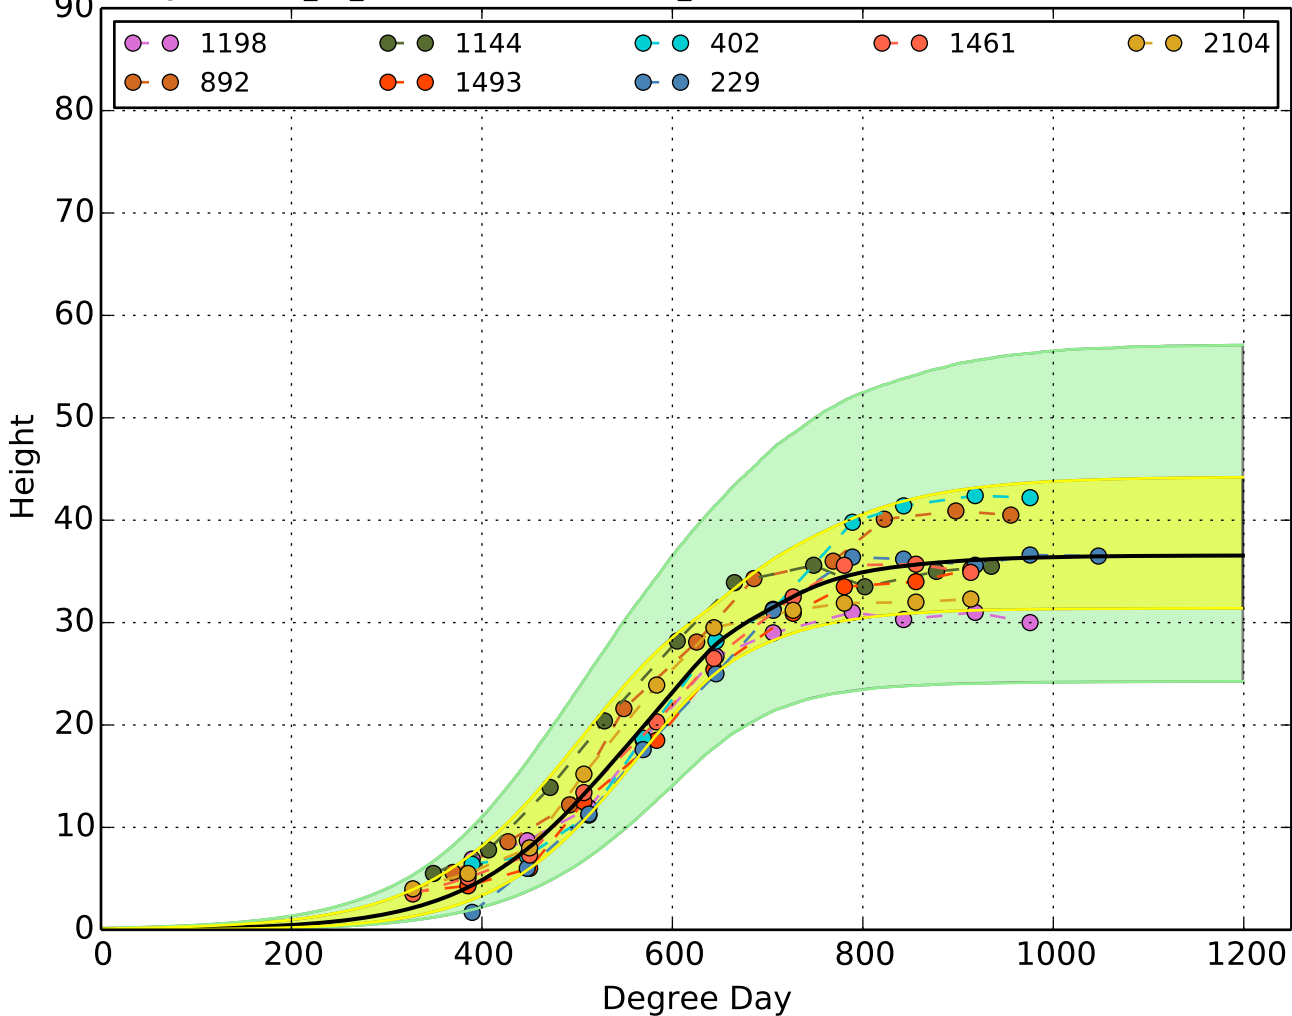

HeightModel3\_v1\_ResErrModel,Treat= CR\_2012,Line 251 (#Inv=8);95CI GrowthCurves

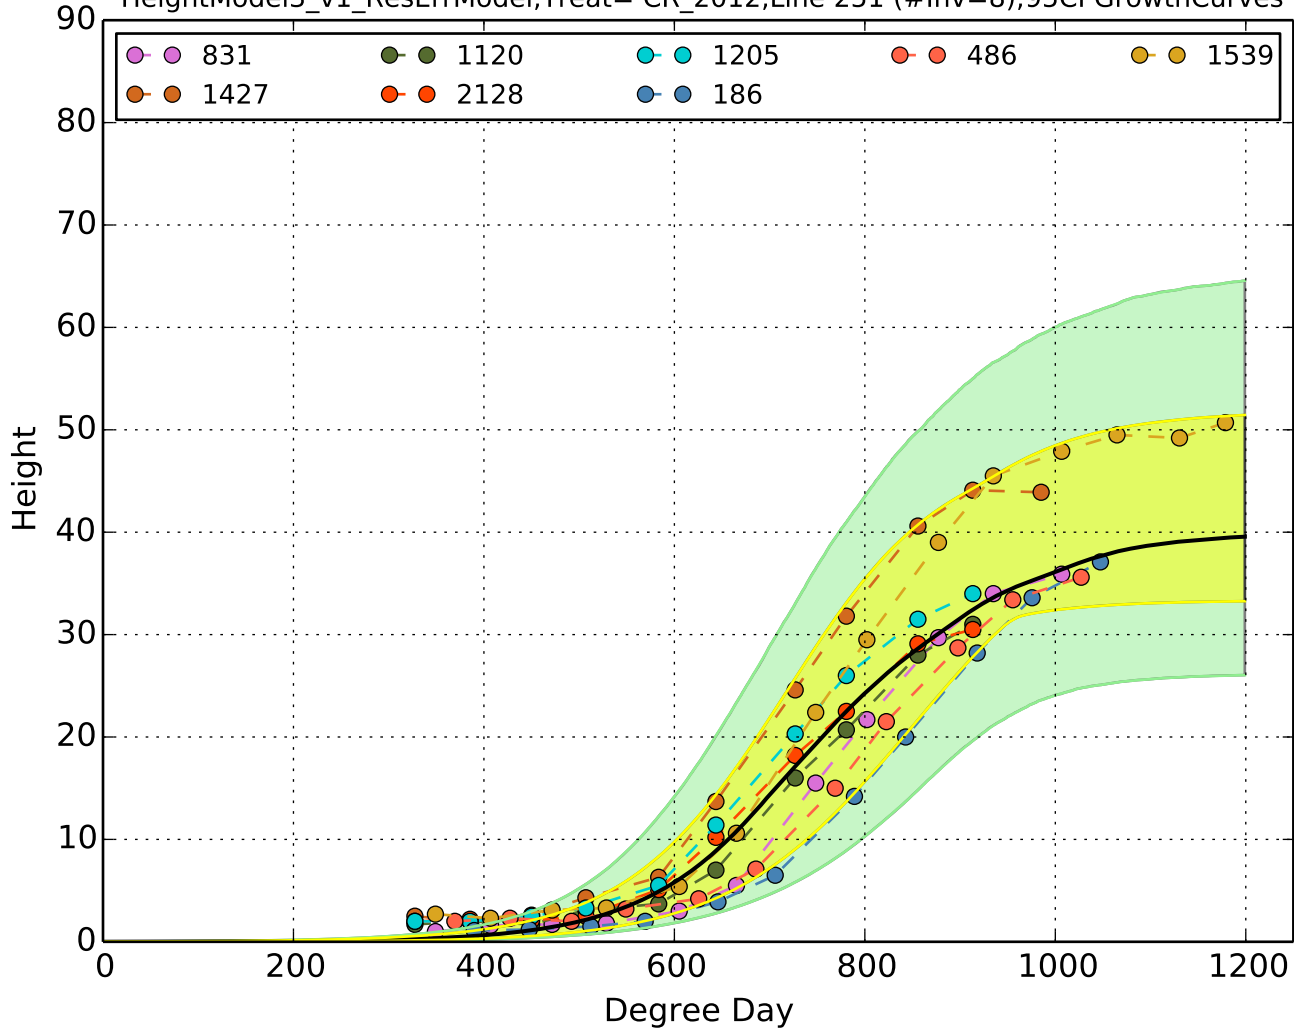

HeightModel3\_v1\_ResErrModel,Treat= CR\_2012,Line 253 (#Inv=7);95CI GrowthCurves

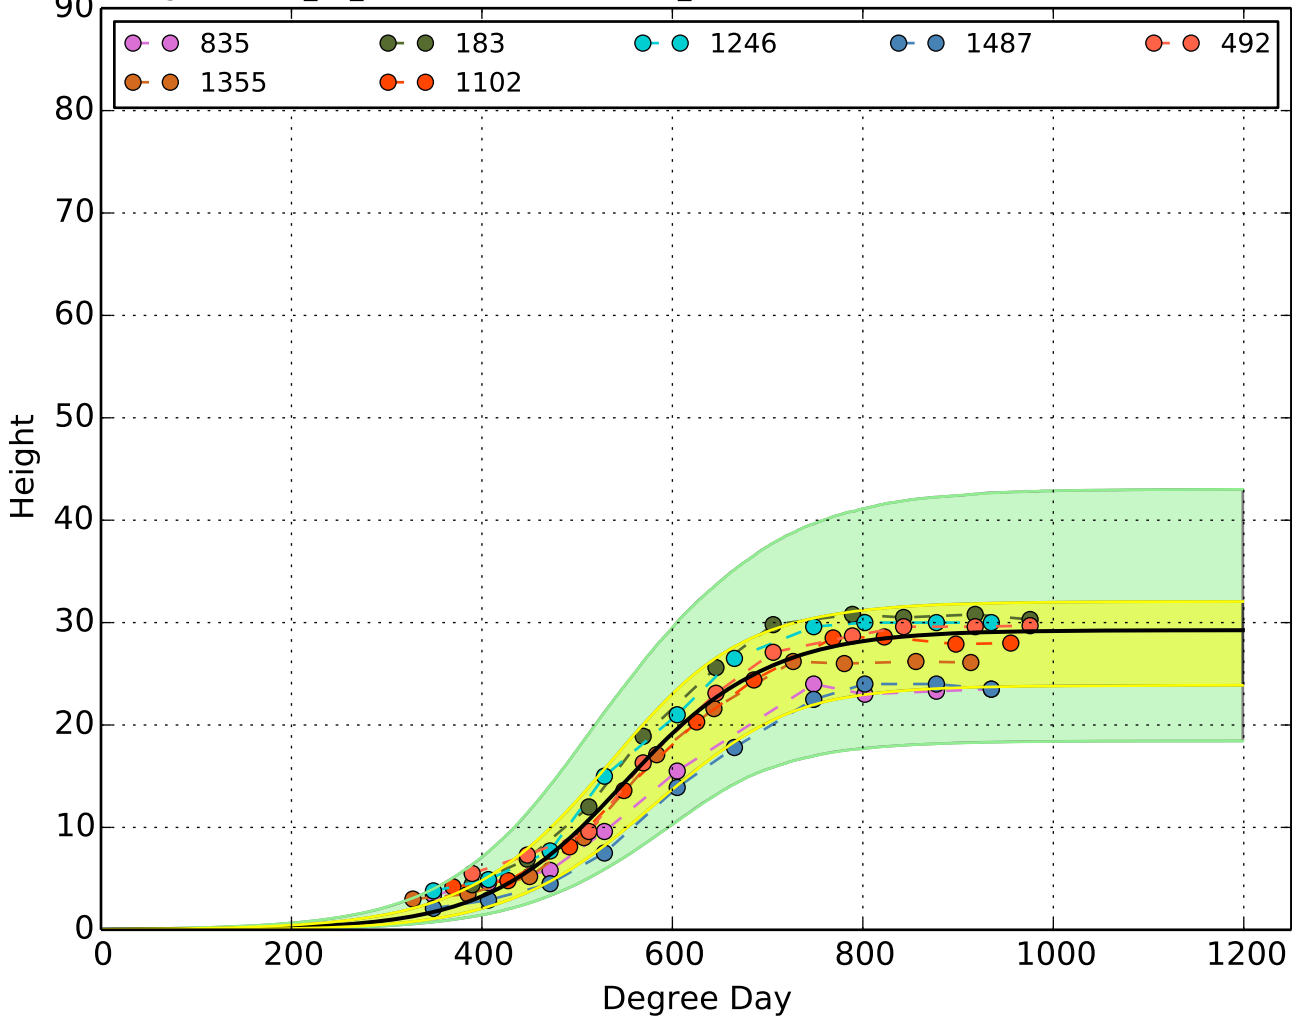

HeightModel3\_v1\_ResErrModel,Treat= CR\_2012,Line 255 (#Inv=8);95CI GrowthCurves

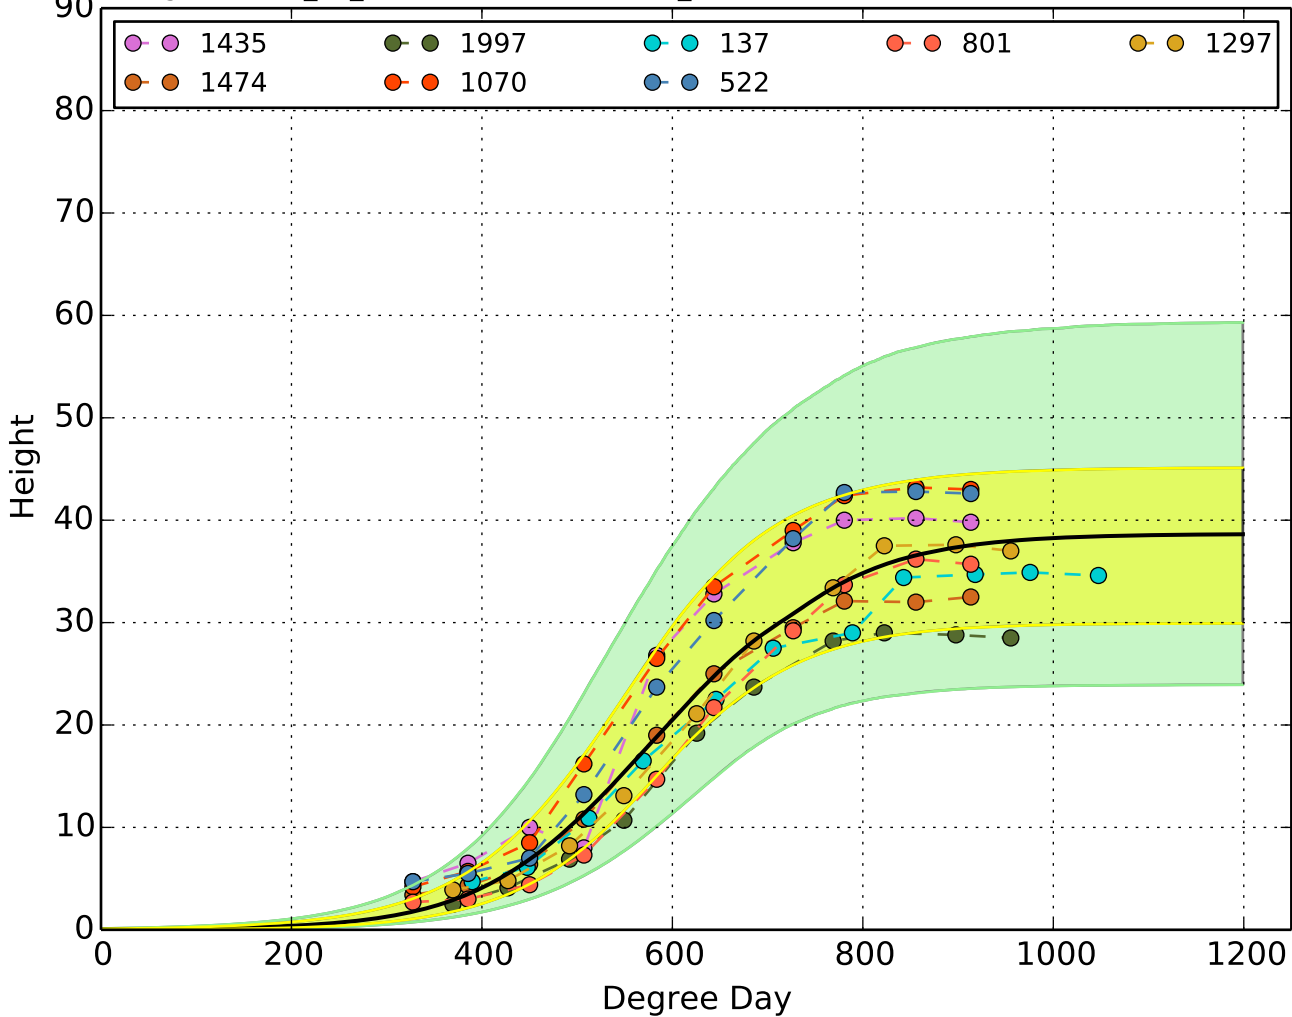



HeightModel3\_v1\_ResErrModel,Treat= CR\_2012,Line 256 (#Inv=8);95CI GrowthCurves

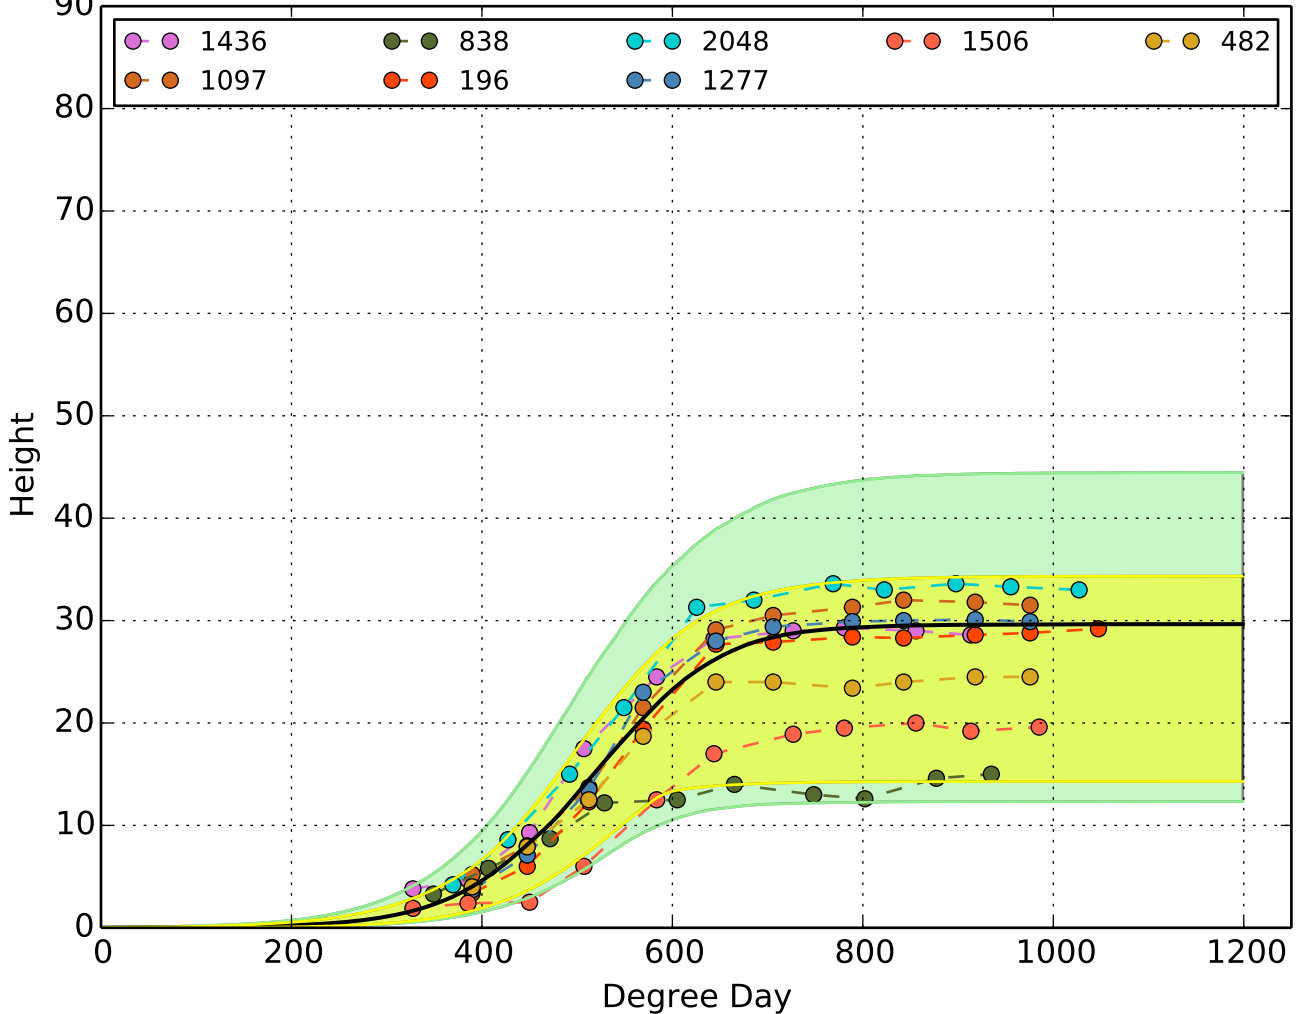

HeightModel3\_v1\_ResErrModel,Treat= CR\_2012,Line 259 (#Inv=8);95CI GrowthCurves

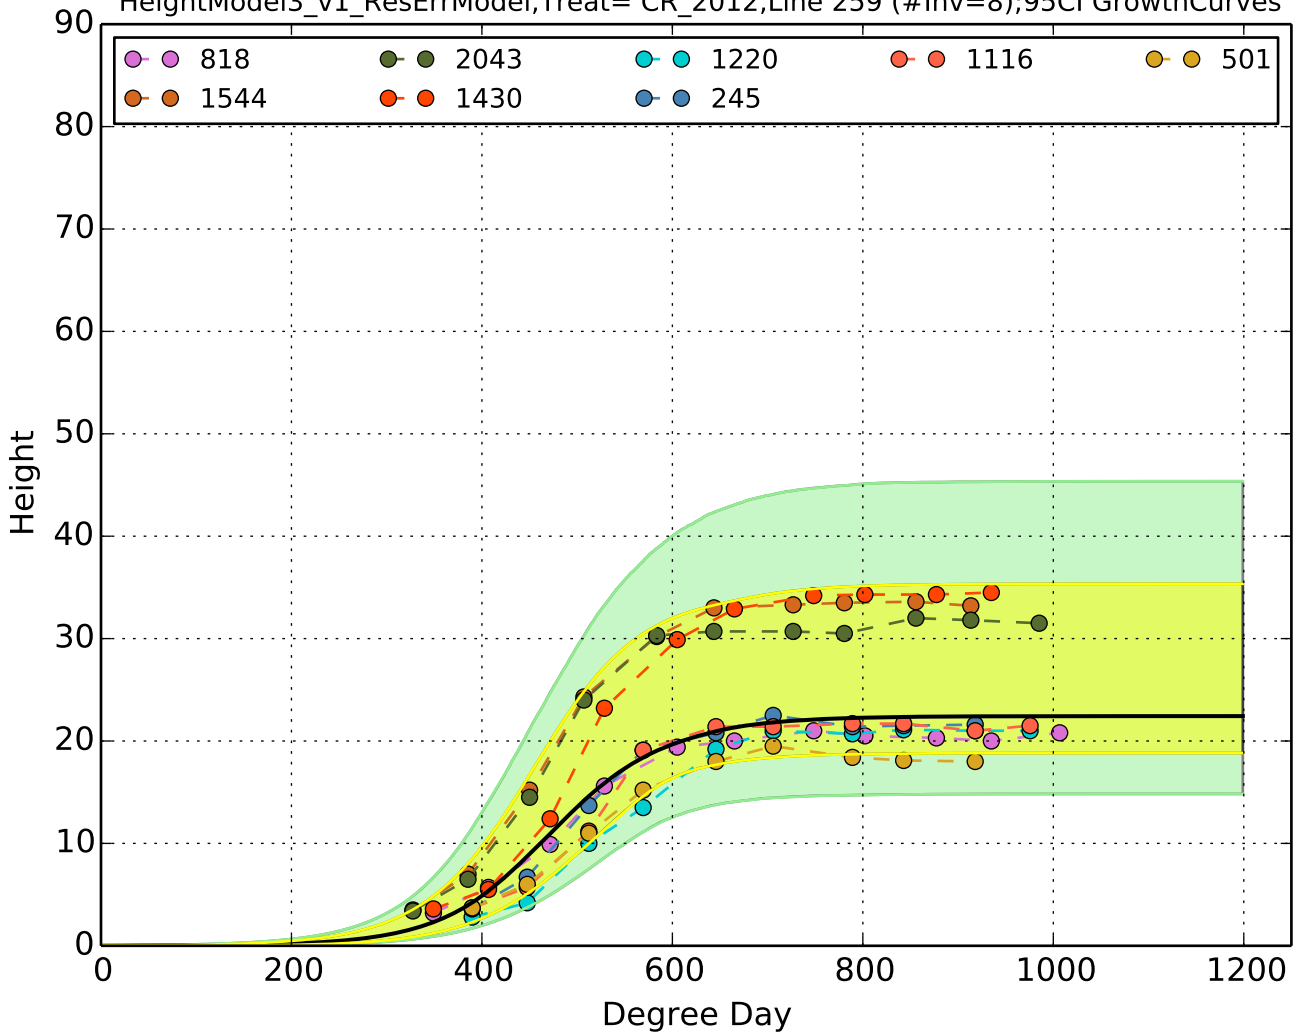

HeightModel3\_v1\_ResErrModel,Treat= CR\_2012,Line 264 (#Inv=7);95CI GrowthCurves

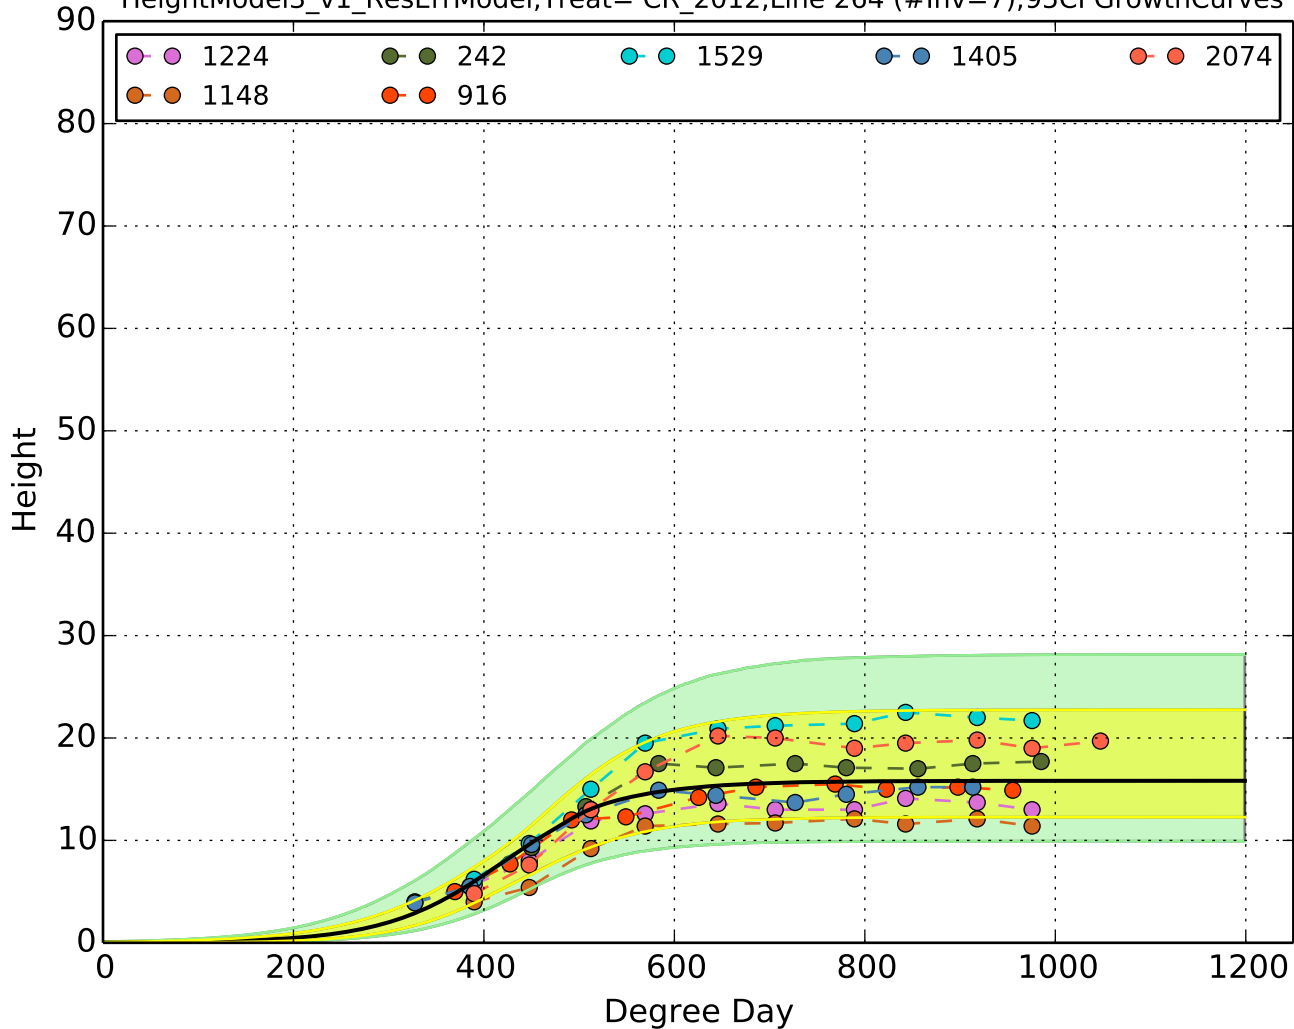

HeightModel3\_v1\_ResErrModel,Treat= CR\_2012,Line 265 (#Inv=5);95CI GrowthCurves

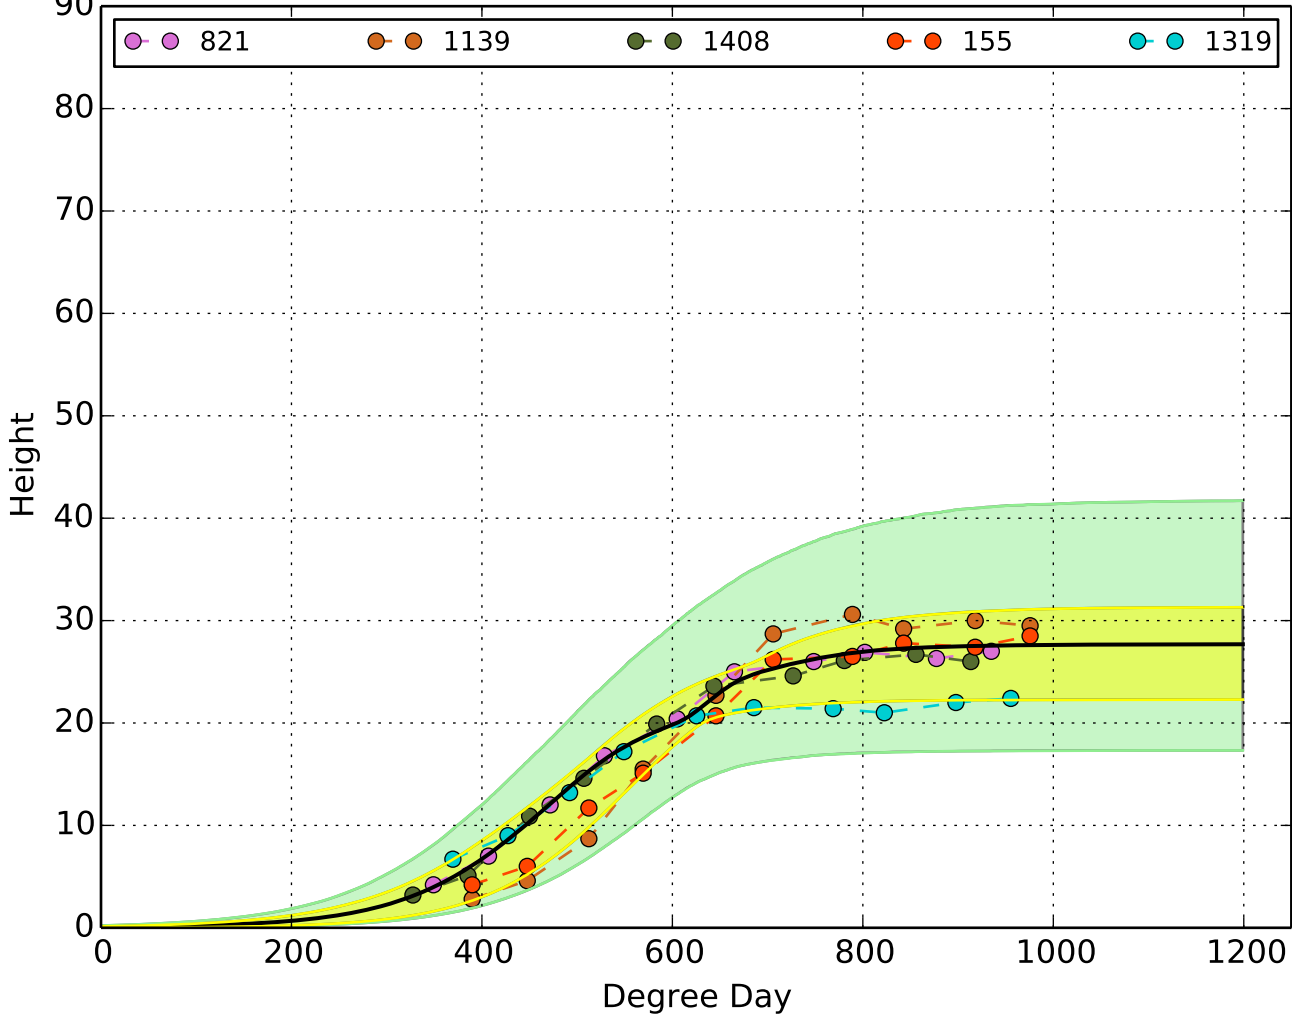

HeightModel3\_v1\_ResErrModel,Treat= CR\_2012,Line 267 (#Inv=6);95CI GrowthCurves

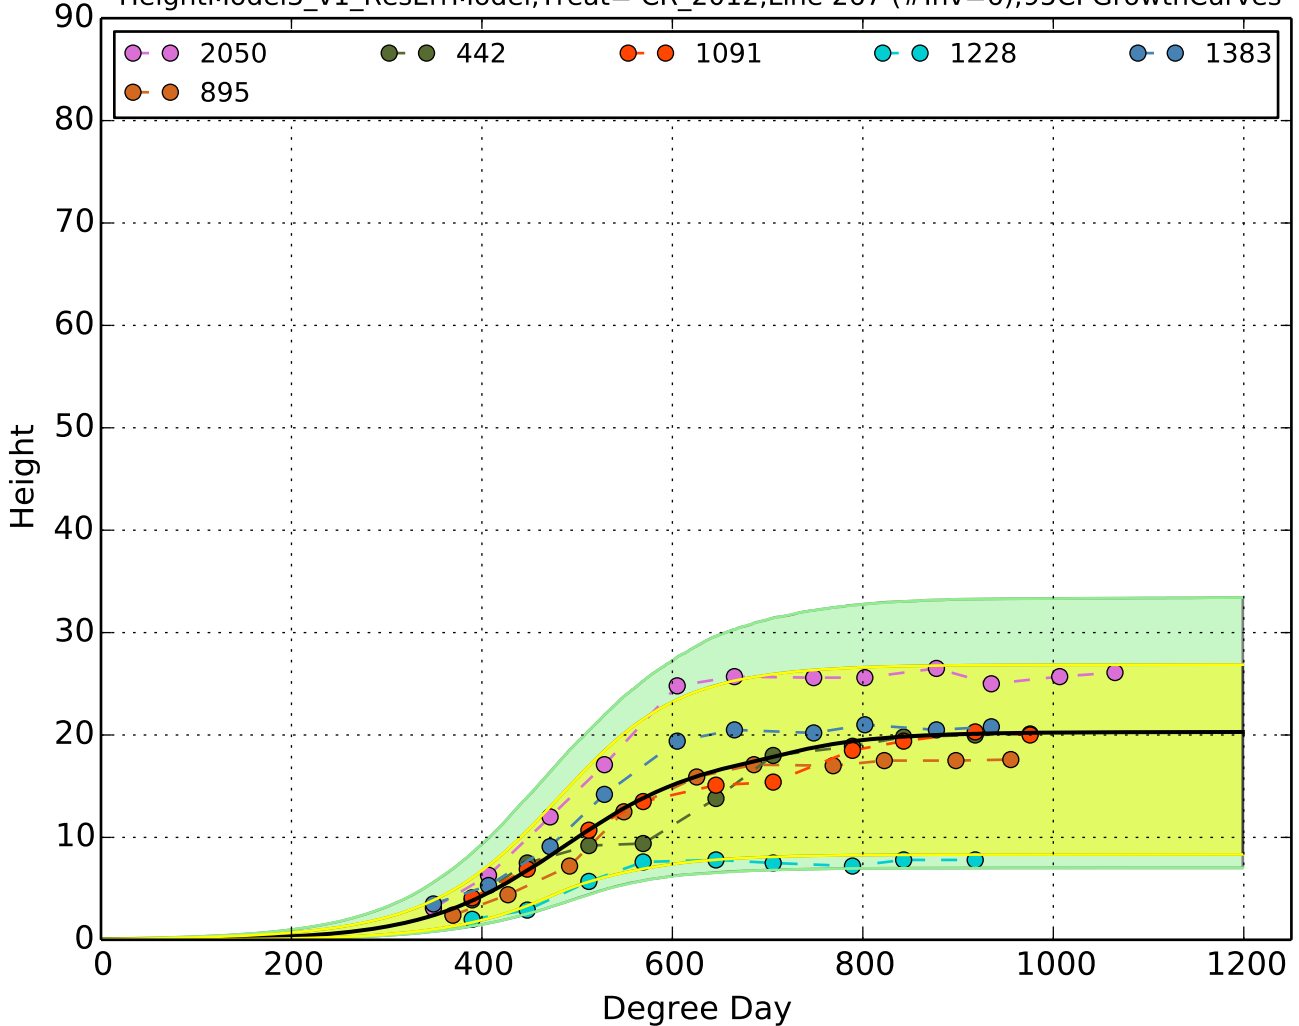

HeightModel3\_v1\_ResErrModel,Treat= CR\_2012,Line 268 (#Inv=5);95CI GrowthCurves

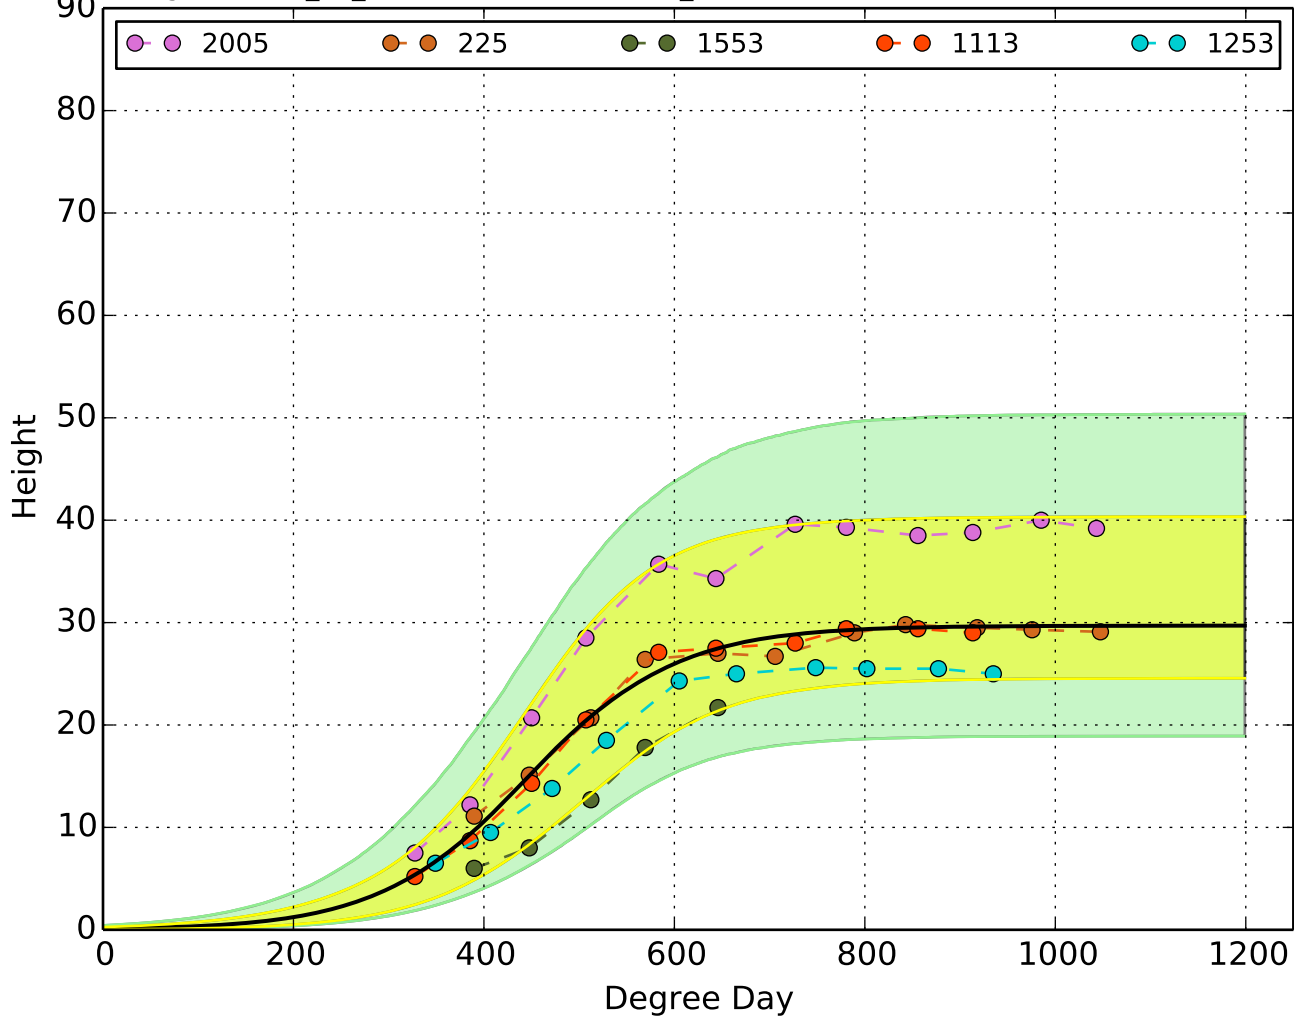

HeightModel3\_v1\_ResErrModel,Treat= CR\_2012,Line 270 (#Inv=5);95CI GrowthCurves

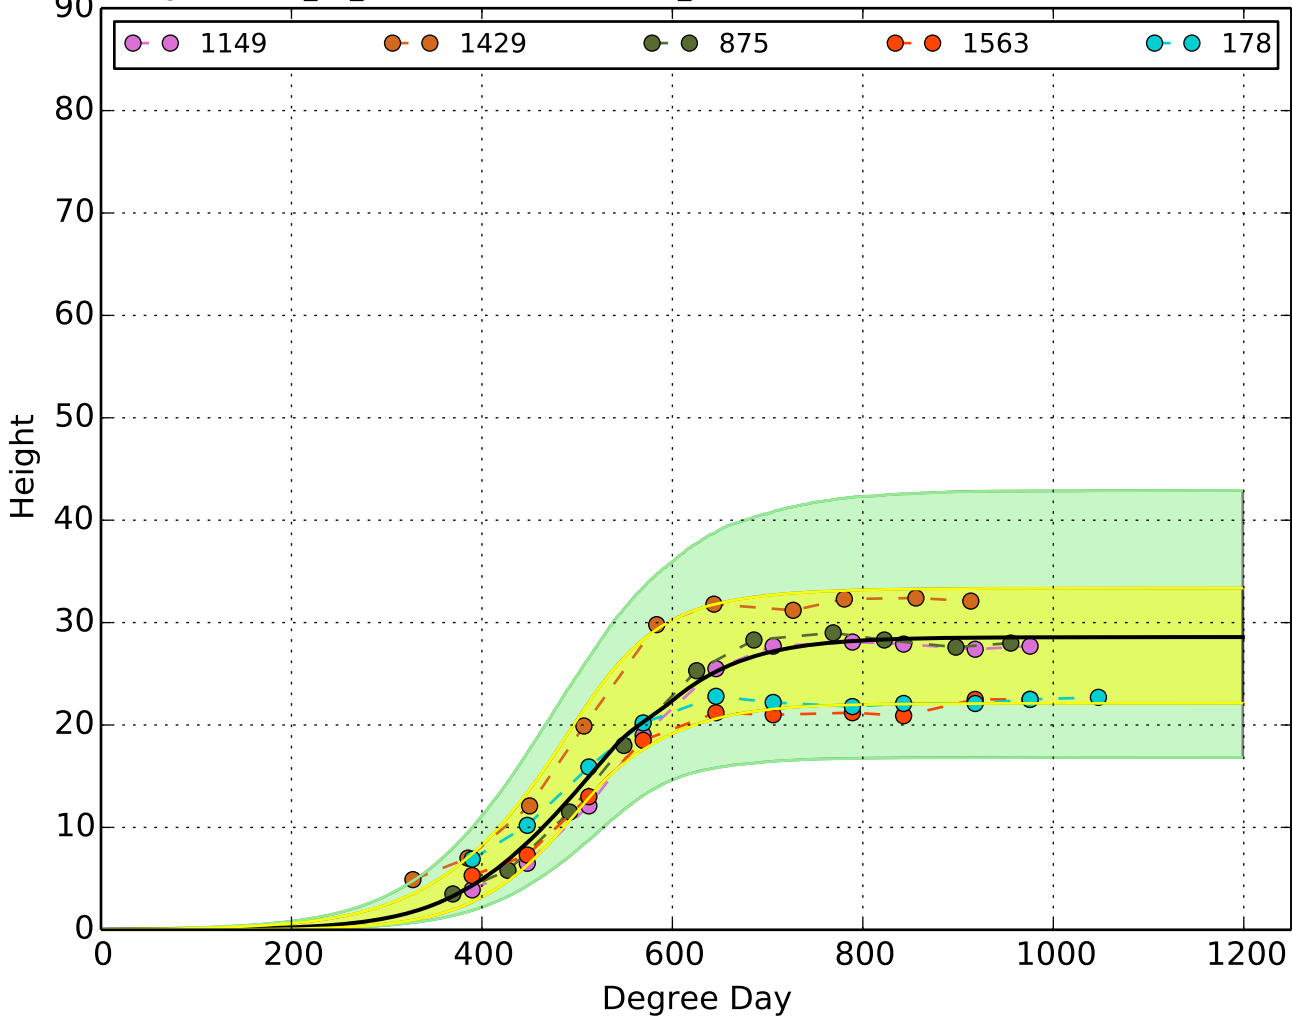

HeightModel3\_v1\_ResErrModel,Treat= CR\_2012,Line 277 (#Inv=8);95CI GrowthCurves

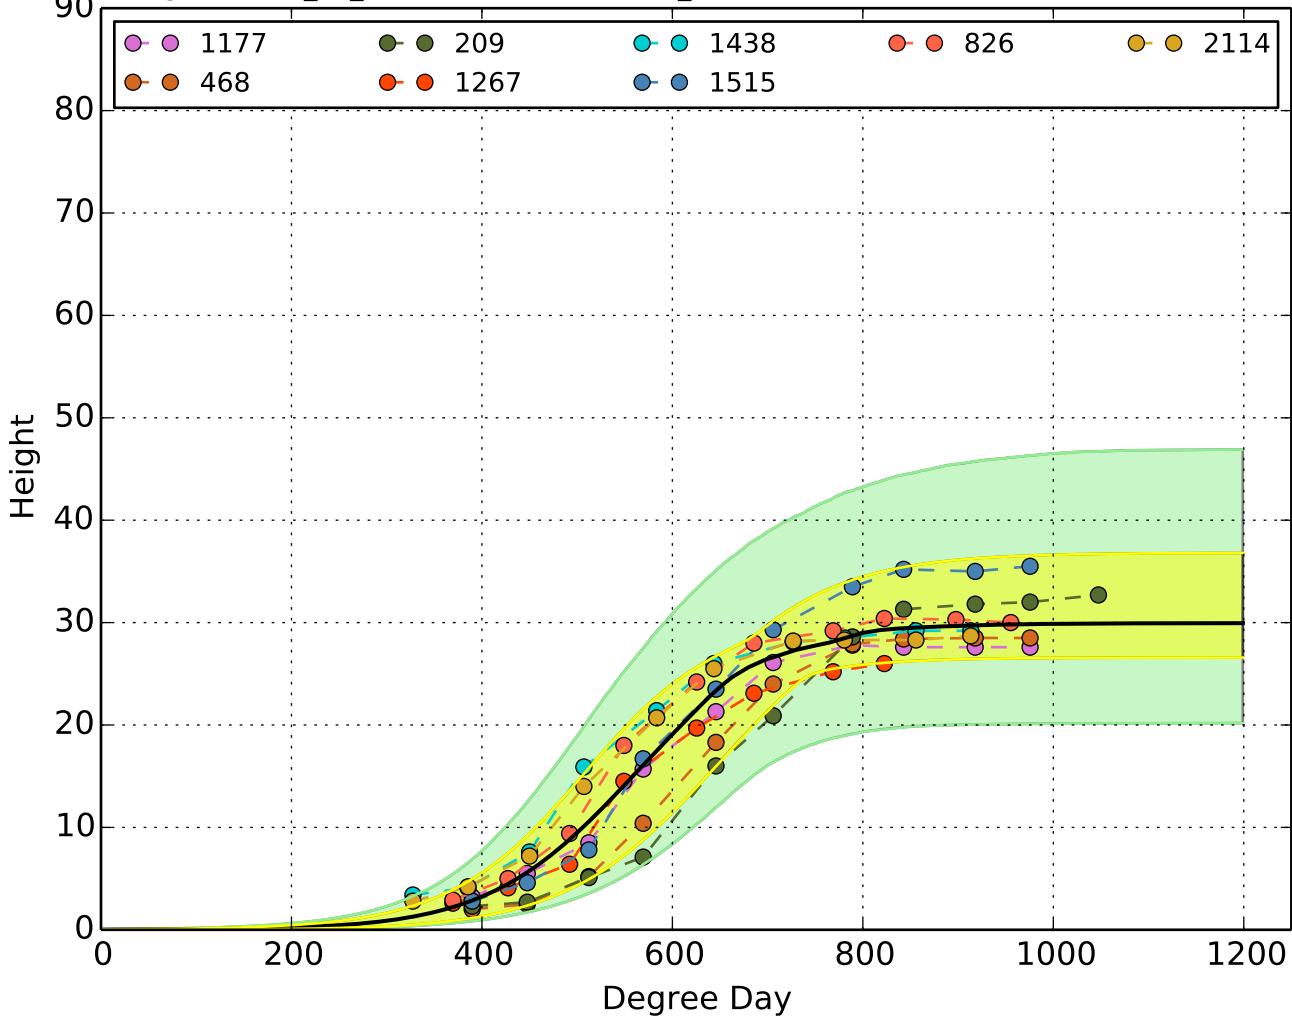



HeightModel3\_v1\_ResErrModel,Treat= CR\_2012,Line 281 (#Inv=8);95CI GrowthCurves

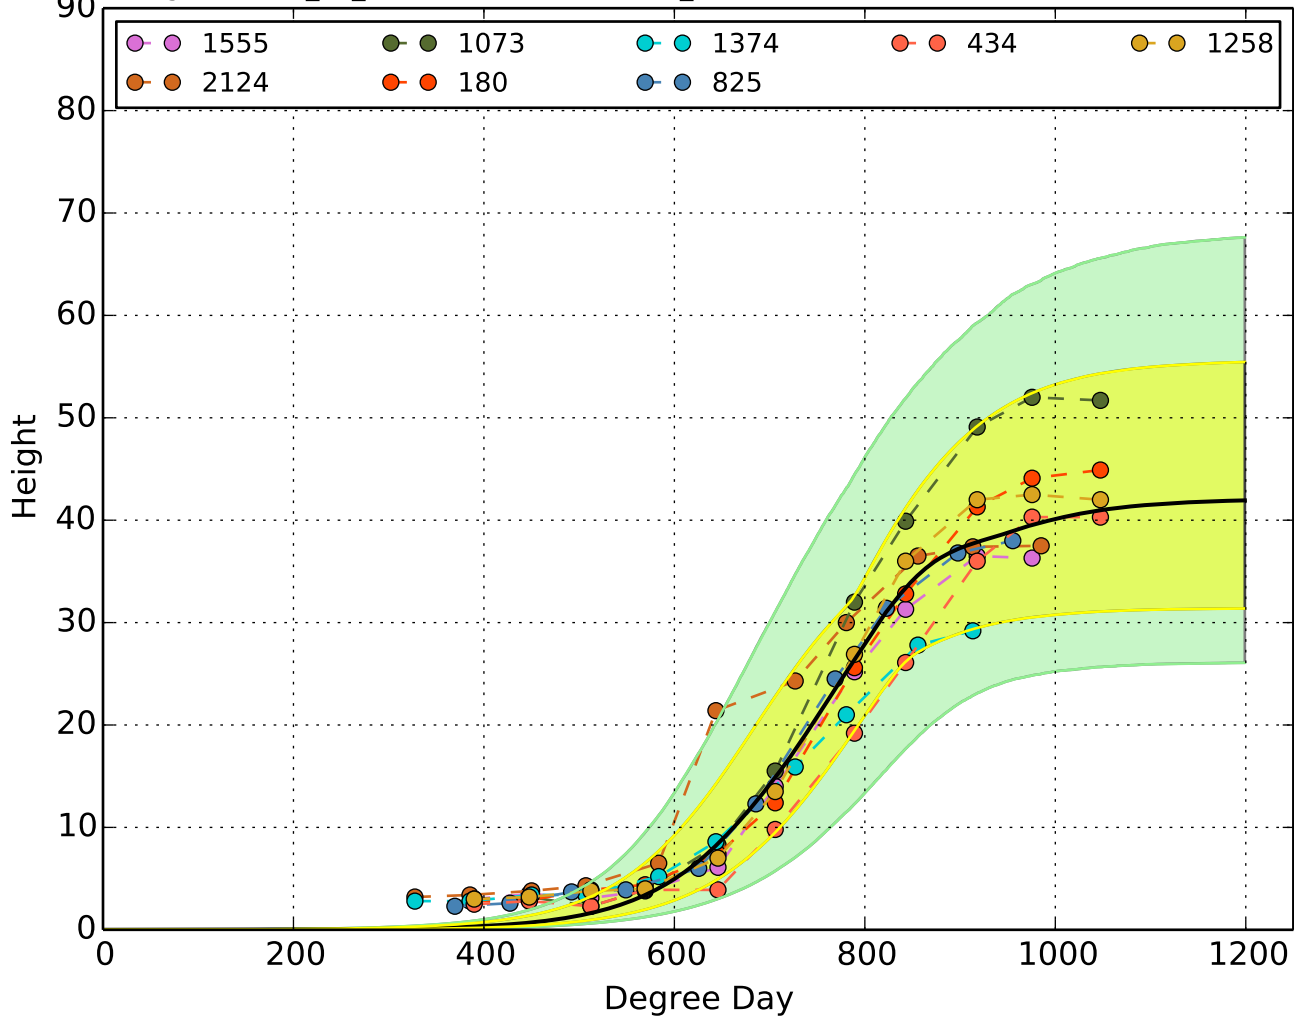

HeightModel3\_v1\_ResErrModel,Treat= CR\_2012,Line 282 (#Inv=7);95CI GrowthCurves

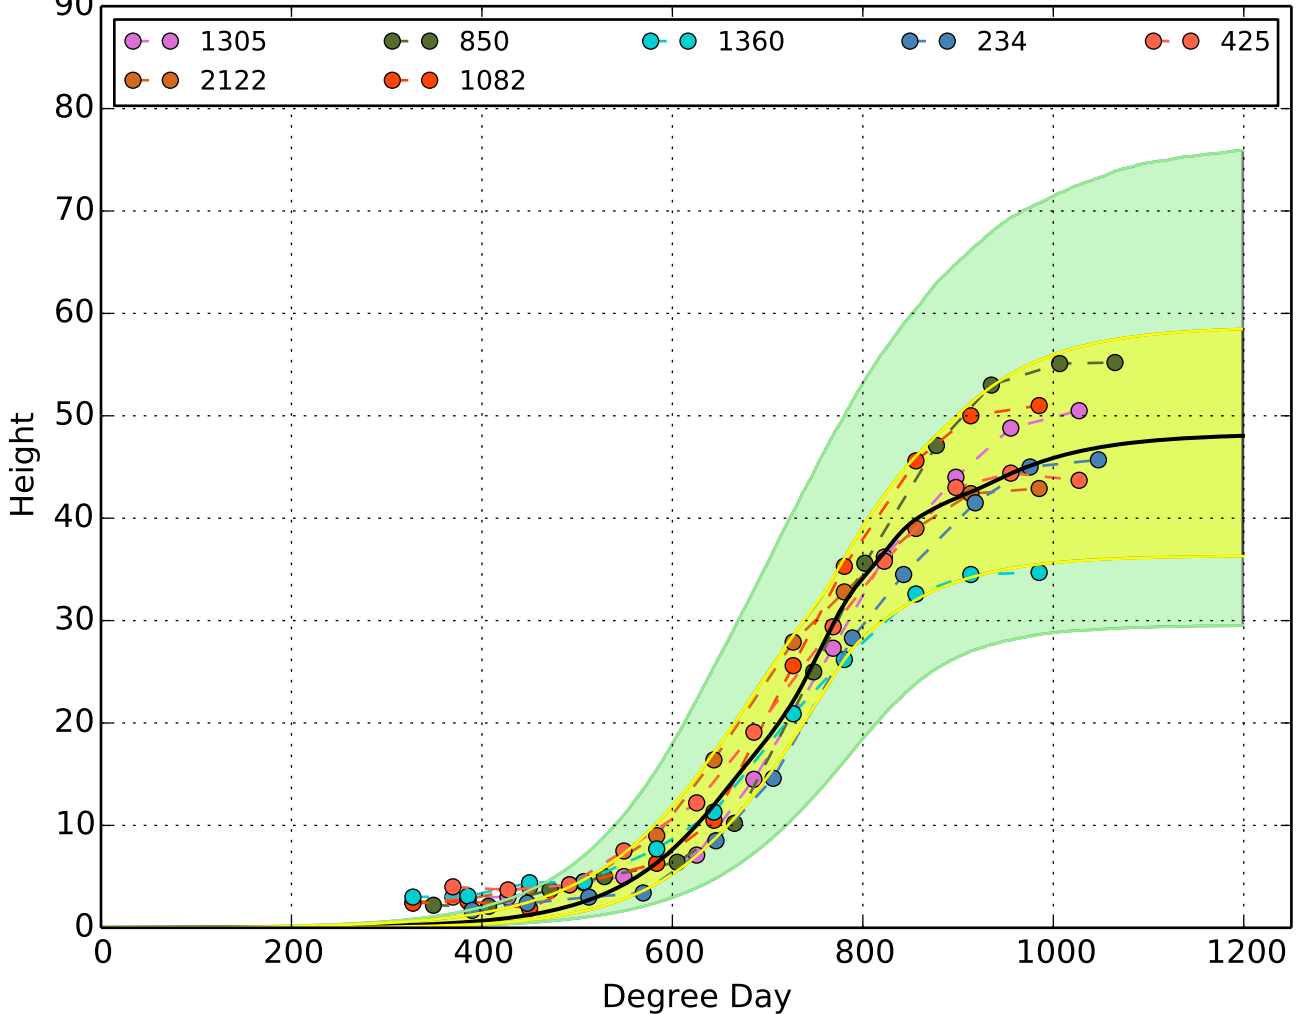

HeightModel3\_v1\_ResErrModel,Treat= CR\_2012,Line 284 (#Inv=8);95CI GrowthCurves

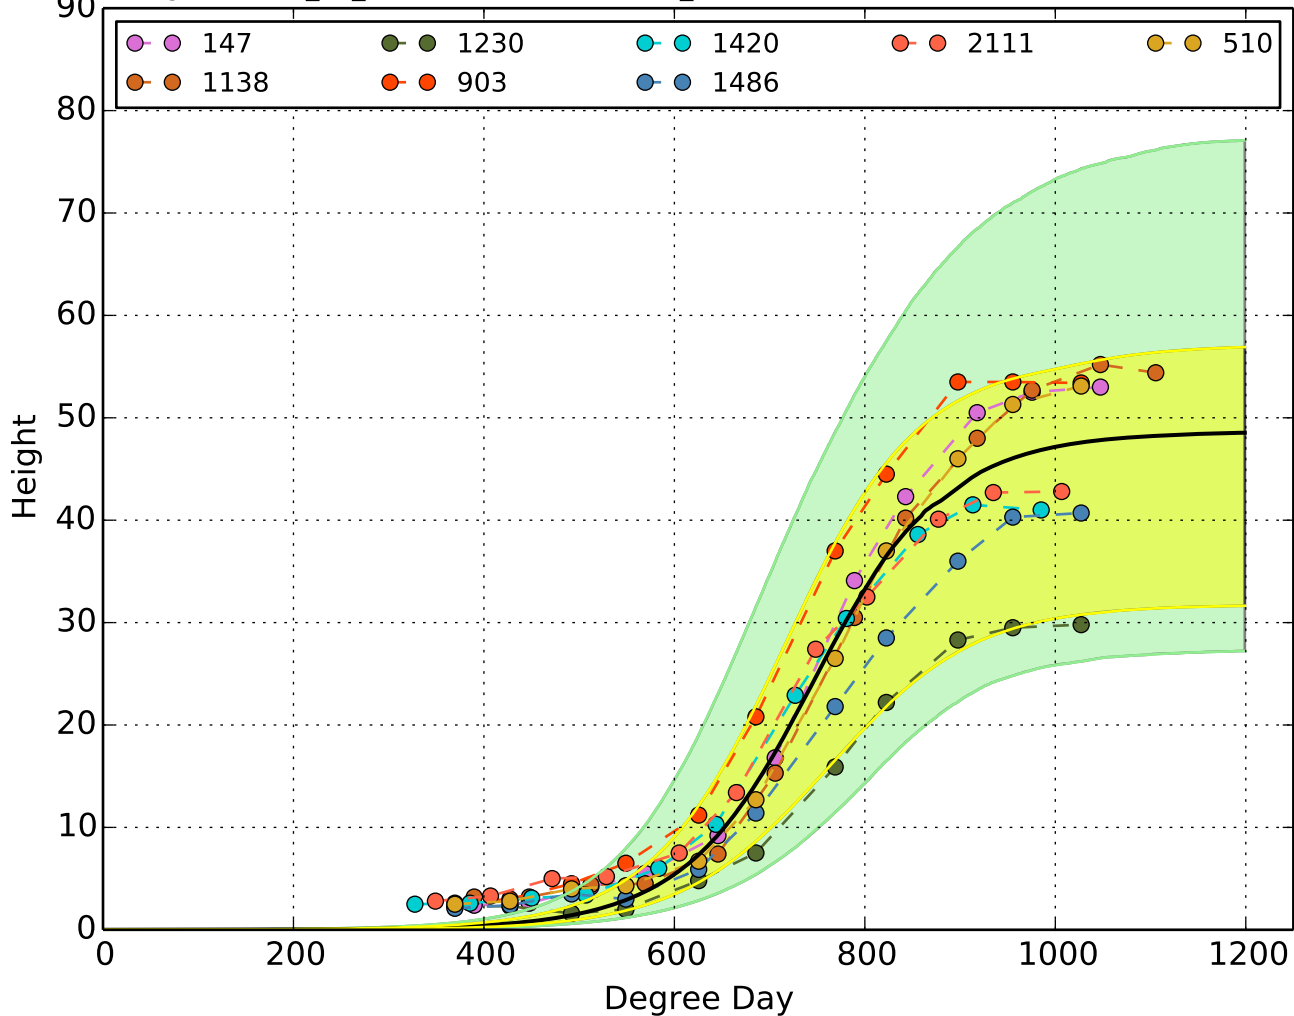

HeightModel3\_v1\_ResErrModel,Treat= CR\_2012,Line 285 (#Inv=7);95CI GrowthCurves

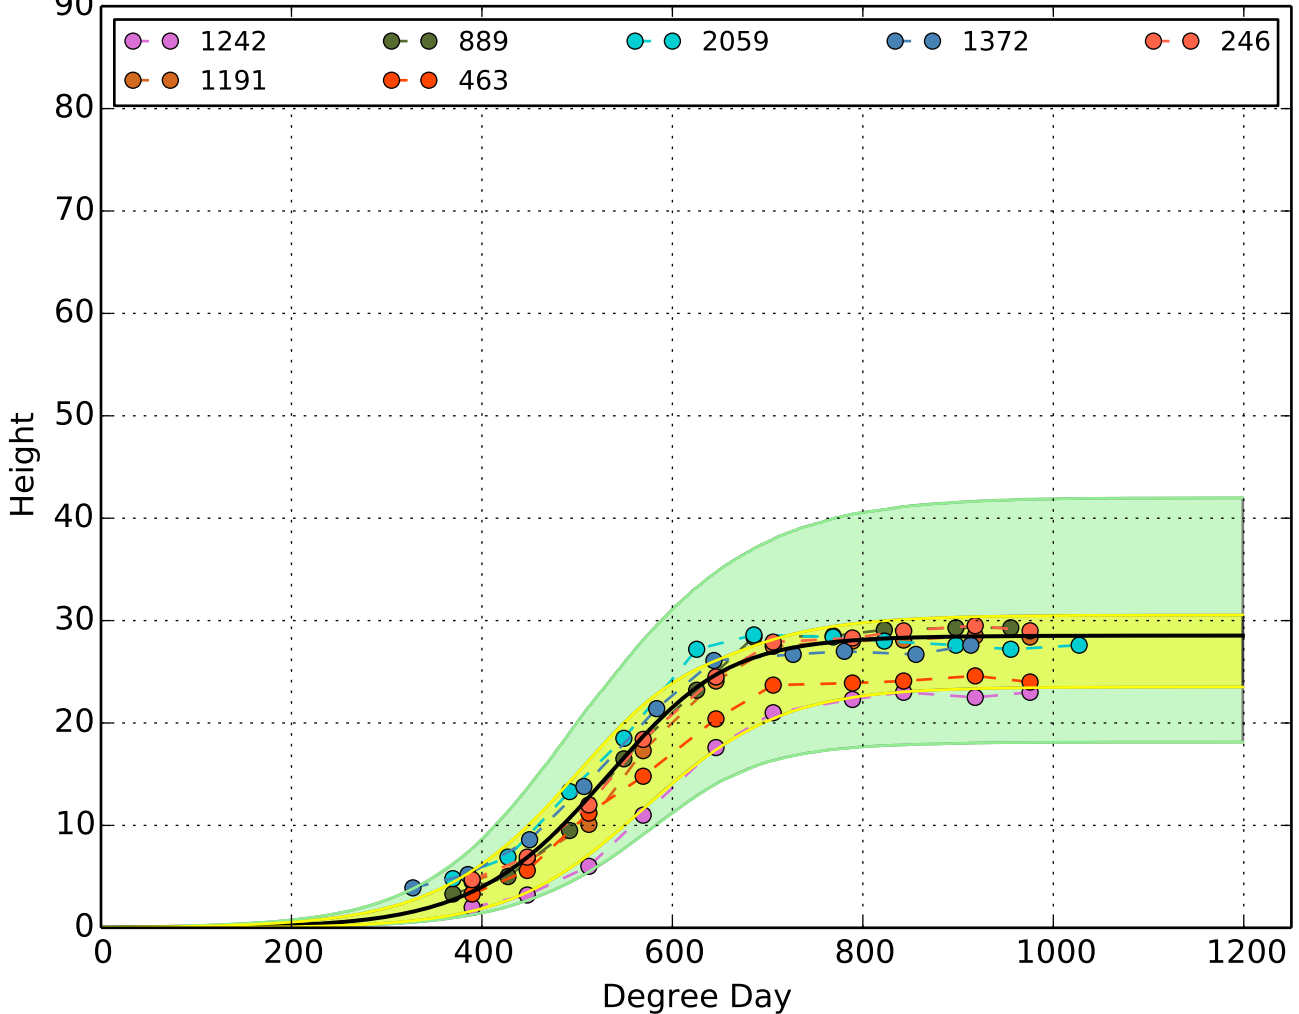

HeightModel3\_v1\_ResErrModel,Treat= CR\_2012,Line 288 (#Inv=6);95CI GrowthCurves

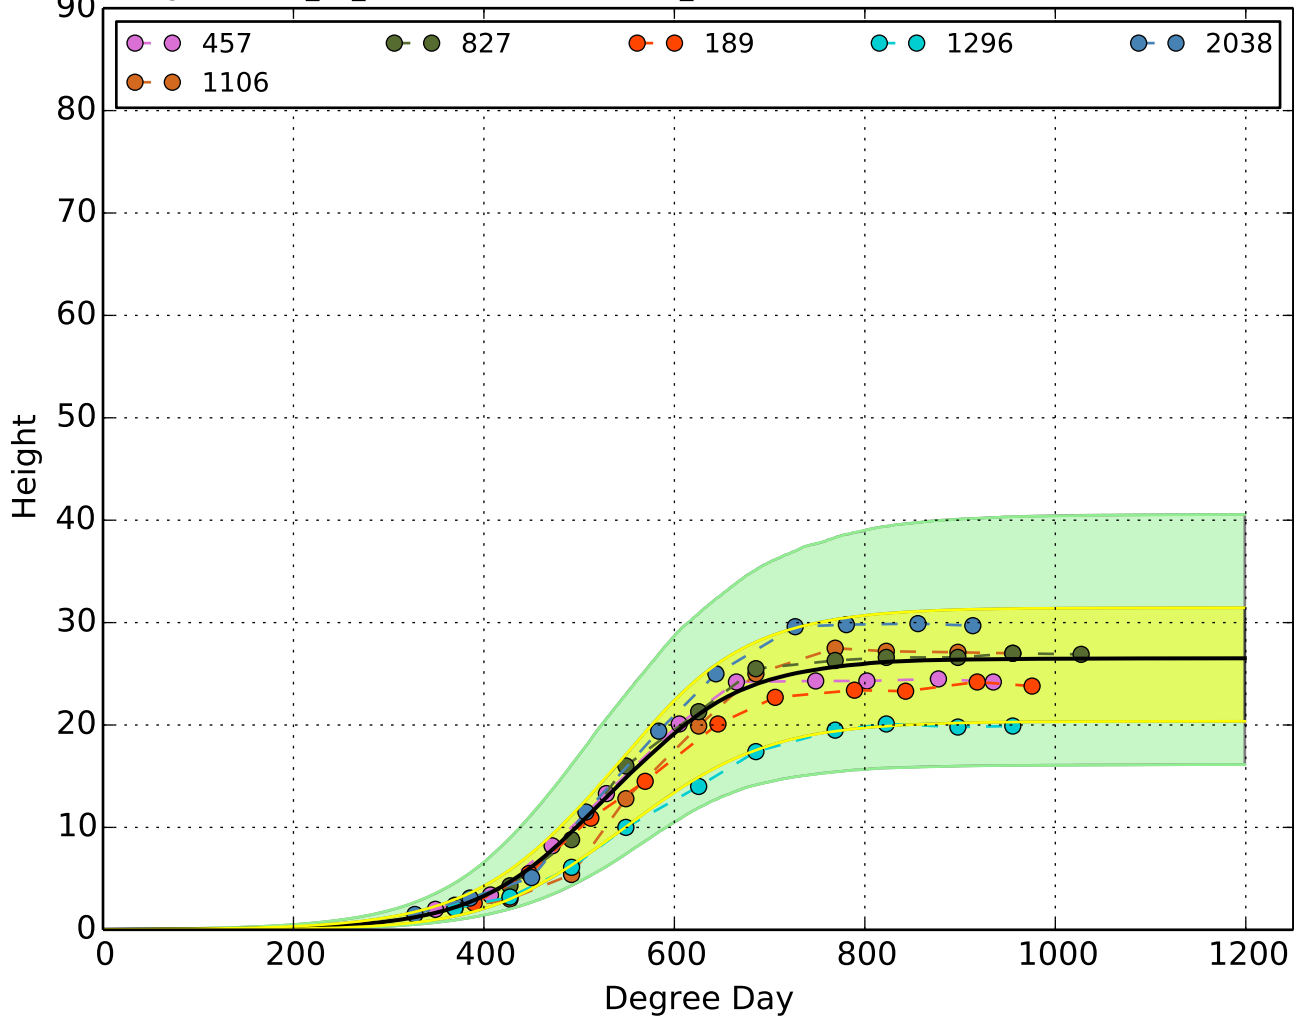

HeightModel3\_v1\_ResErrModel,Treat= CR\_2012,Line 289 (#Inv=6);95CI GrowthCurves

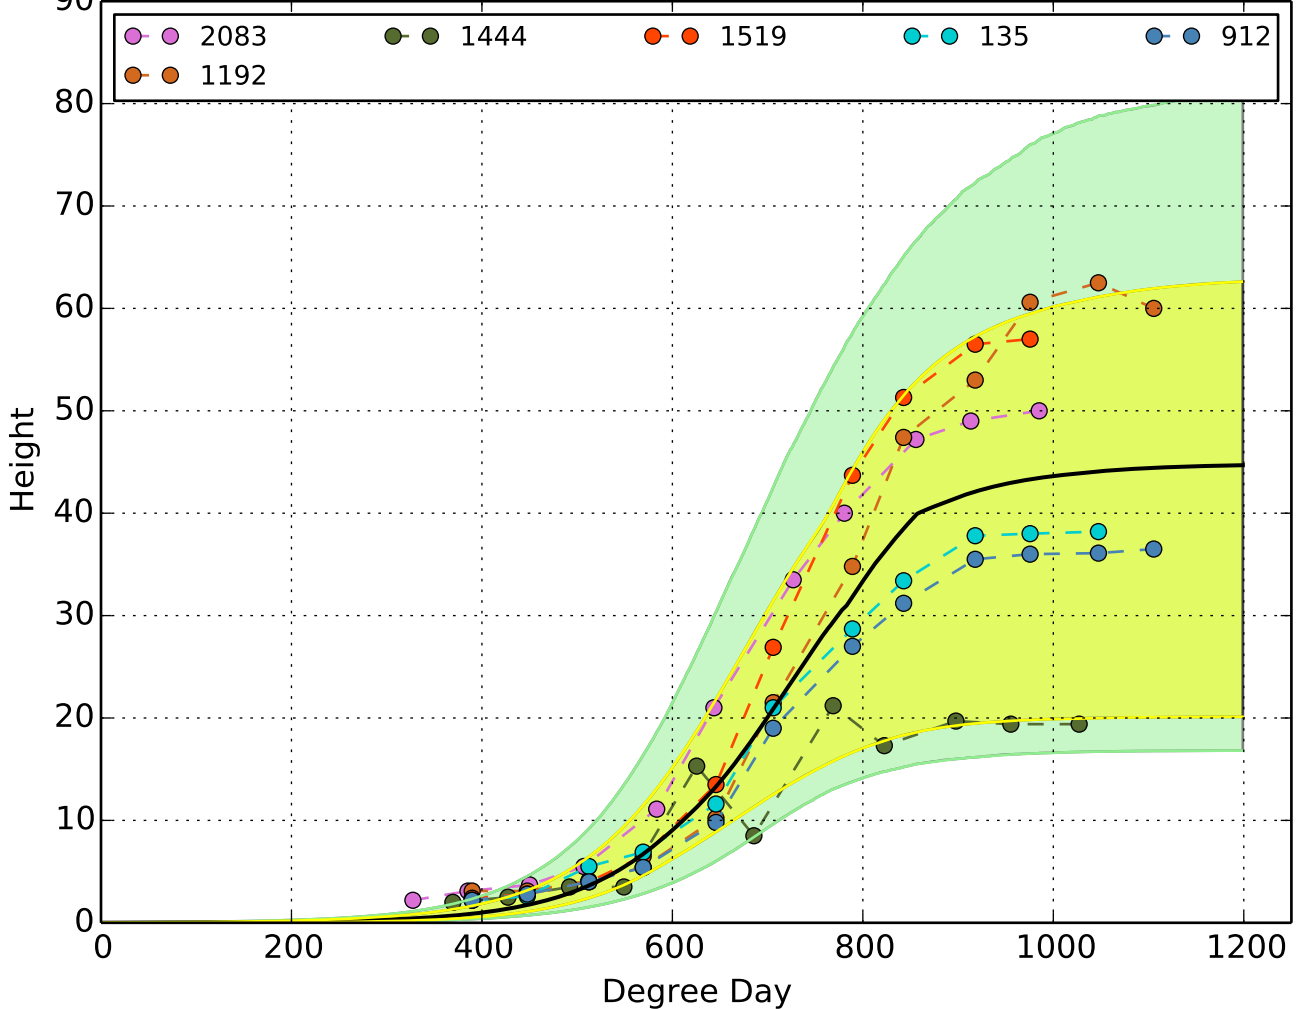

HeightModel3\_v1\_ResErrModel,Treat= CR\_2012,Line 290 (#Inv=6);95CI GrowthCurves

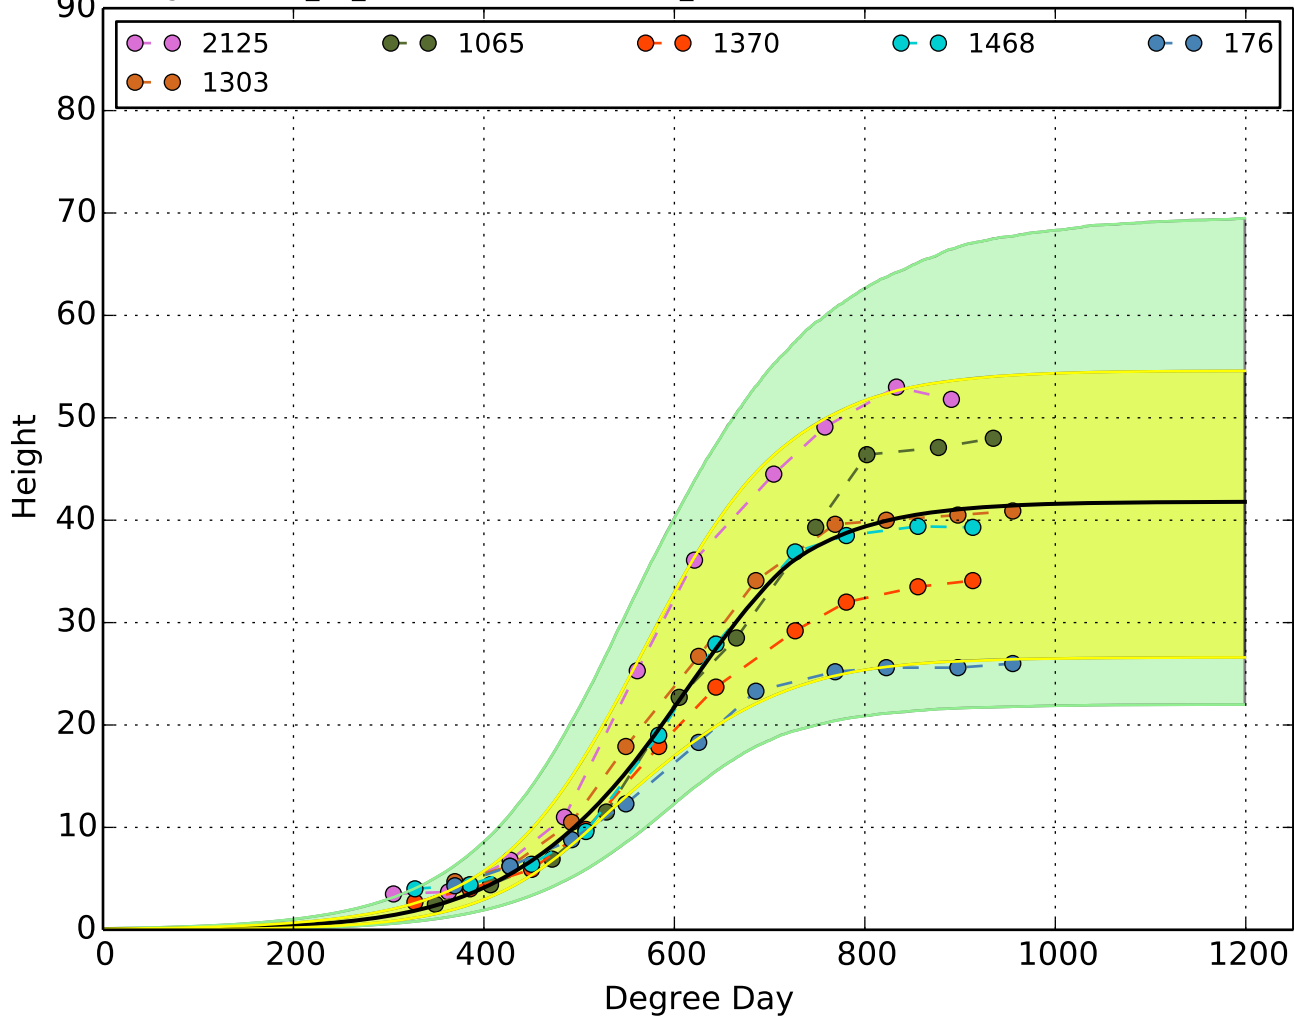

HeightModel3\_v1\_ResErrModel,Treat= CR\_2012,Line 300 (#Inv=8);95CI GrowthCurves

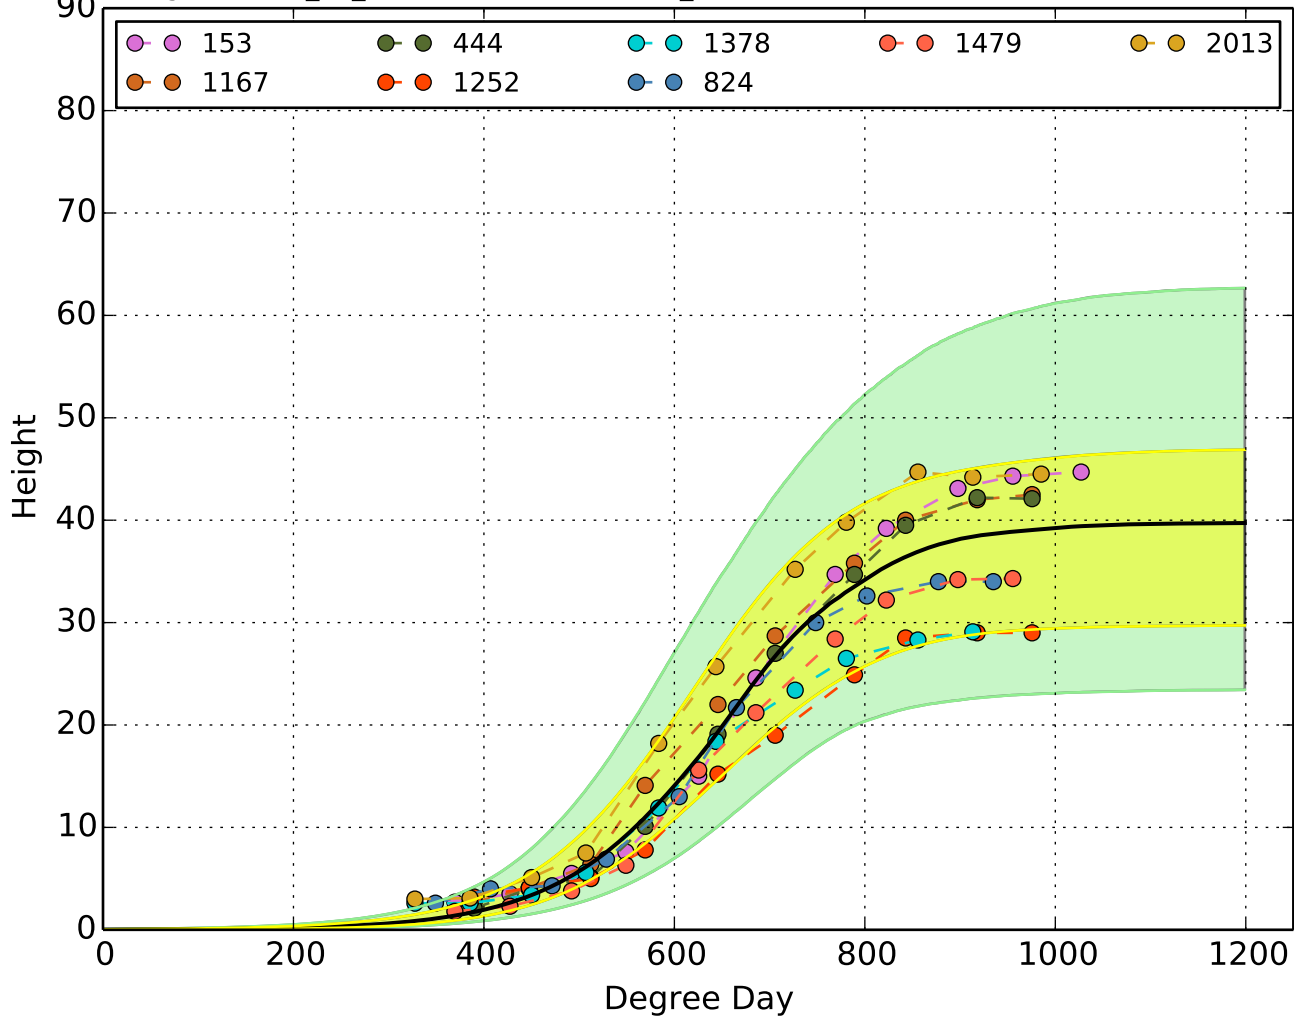



HeightModel3\_v1\_ResErrModel,Treat= CR\_2012,Line 301 (#Inv=7);95CI GrowthCurves

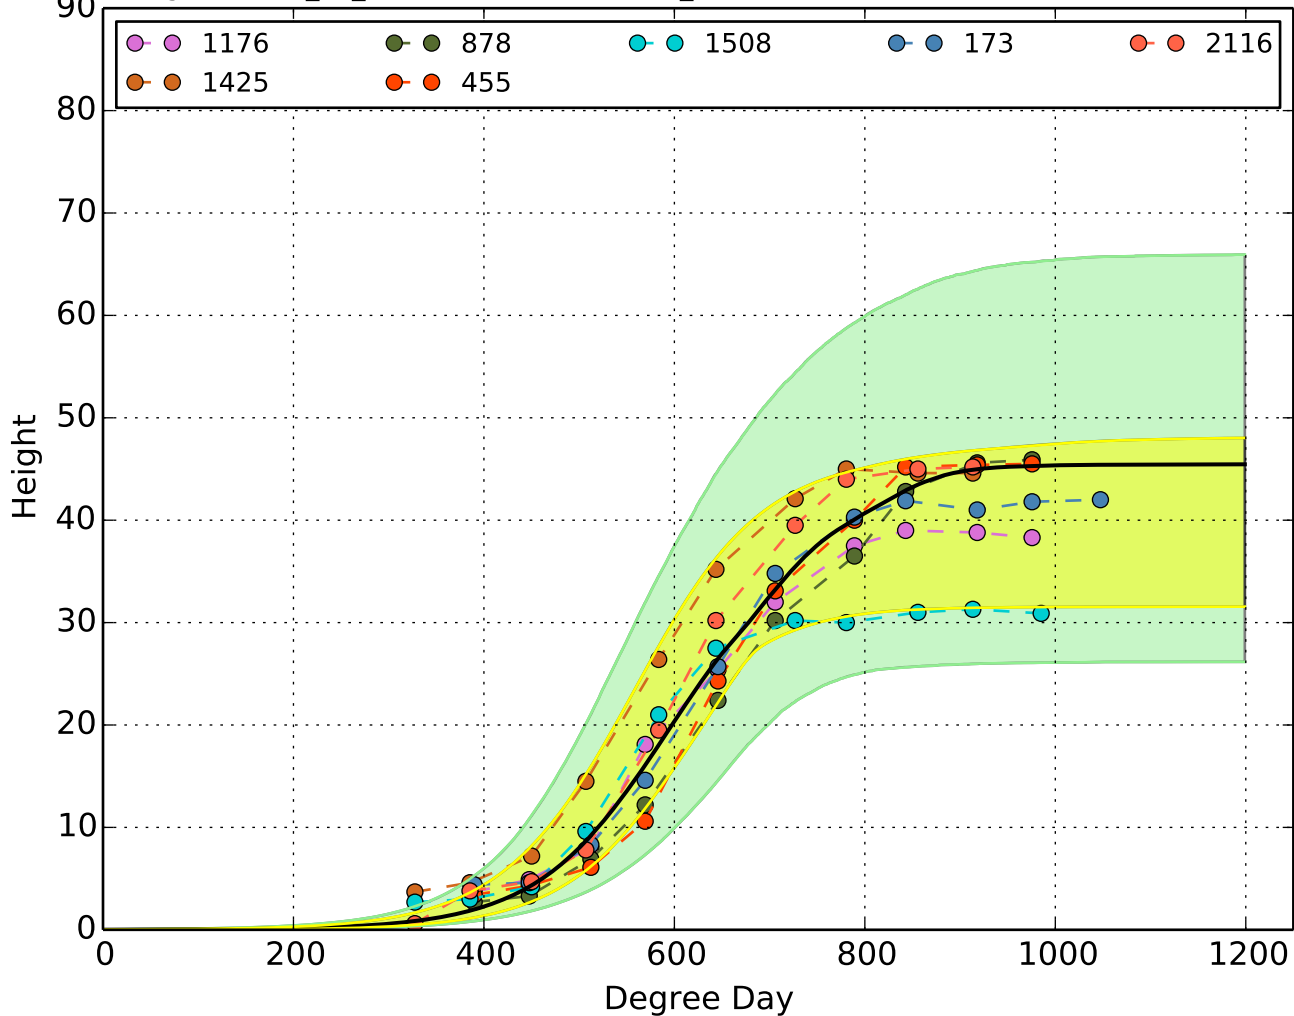

HeightModel3\_v1\_ResErrModel,Treat= CR\_2012,Line 303 (#Inv=7);95CI GrowthCurves

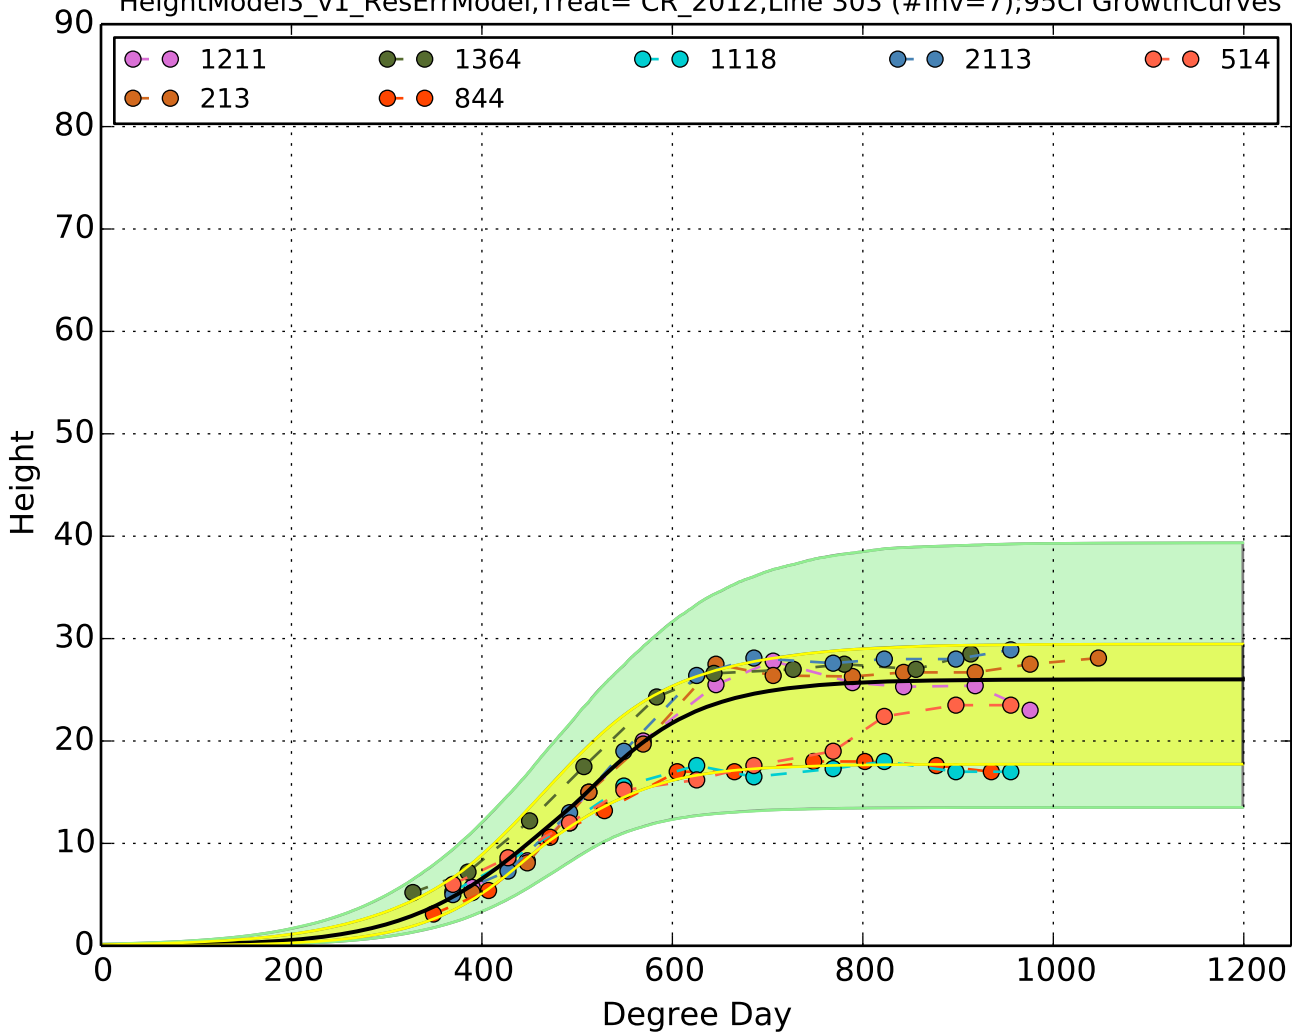

HeightModel3\_v1\_ResErrModel,Treat= CR\_2012,Line 308 (#Inv=6);95CI GrowthCurves

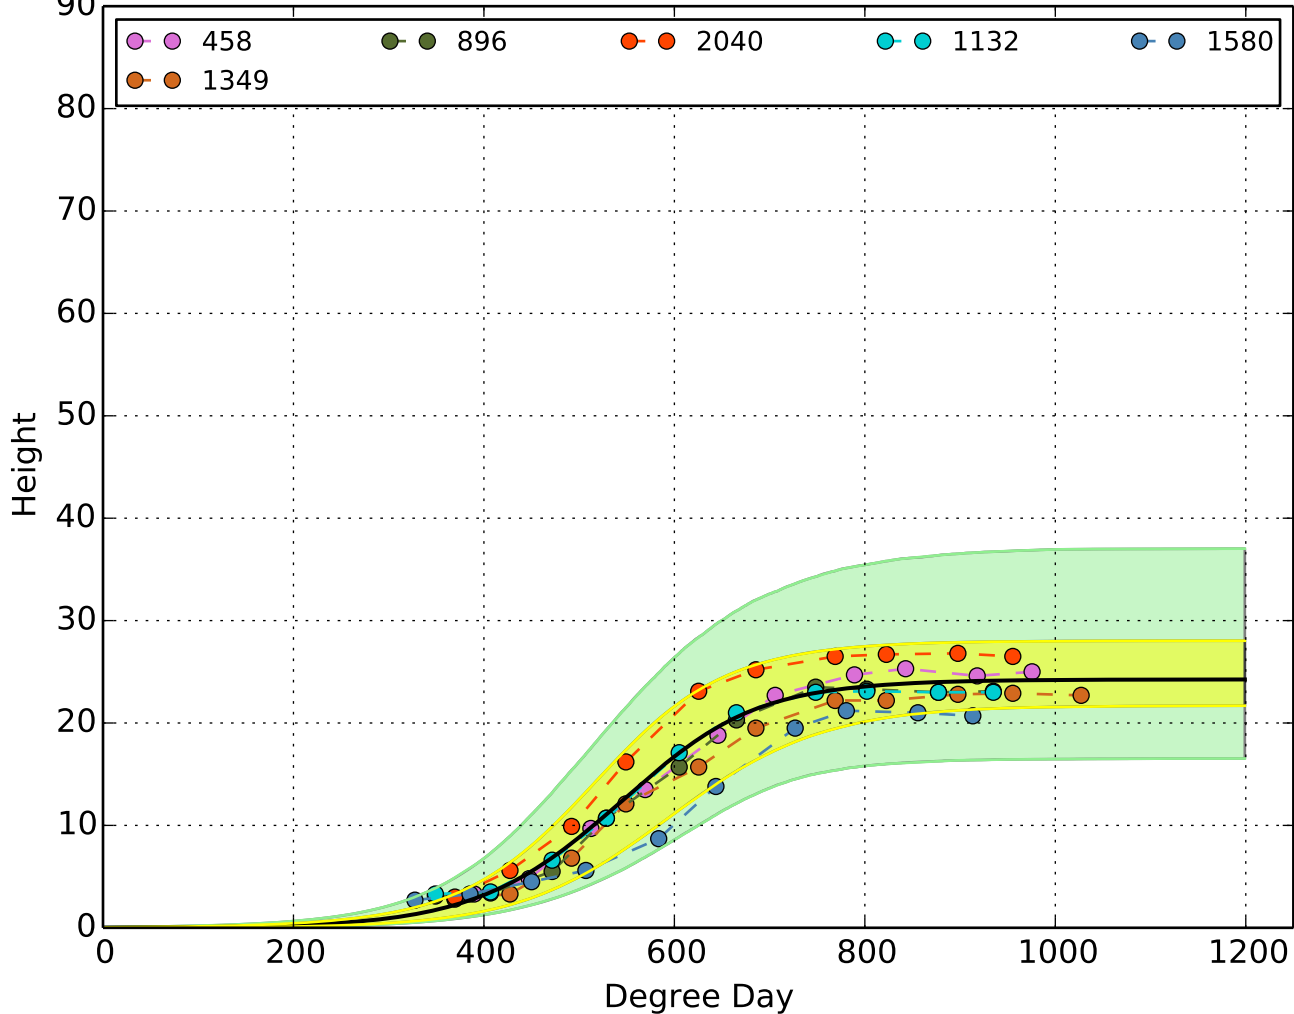

HeightModel3\_v1\_ResErrModel,Treat= CR\_2012,Line 311 (#Inv=5);95CI GrowthCurves

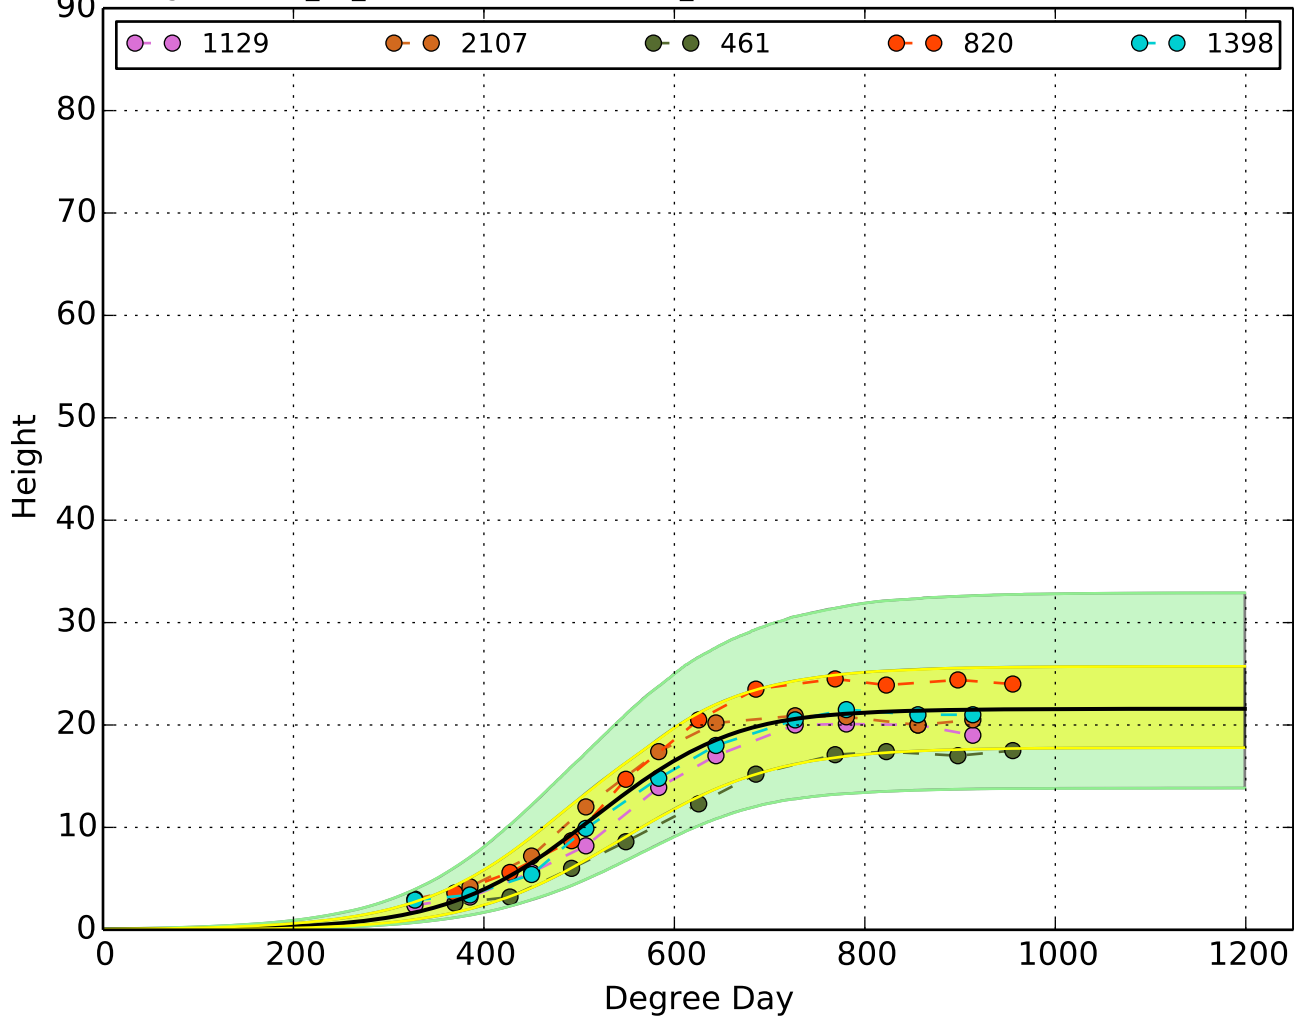

HeightModel3\_v1\_ResErrModel,Treat= CR\_2012,Line 318 (#Inv=6);95CI GrowthCurves

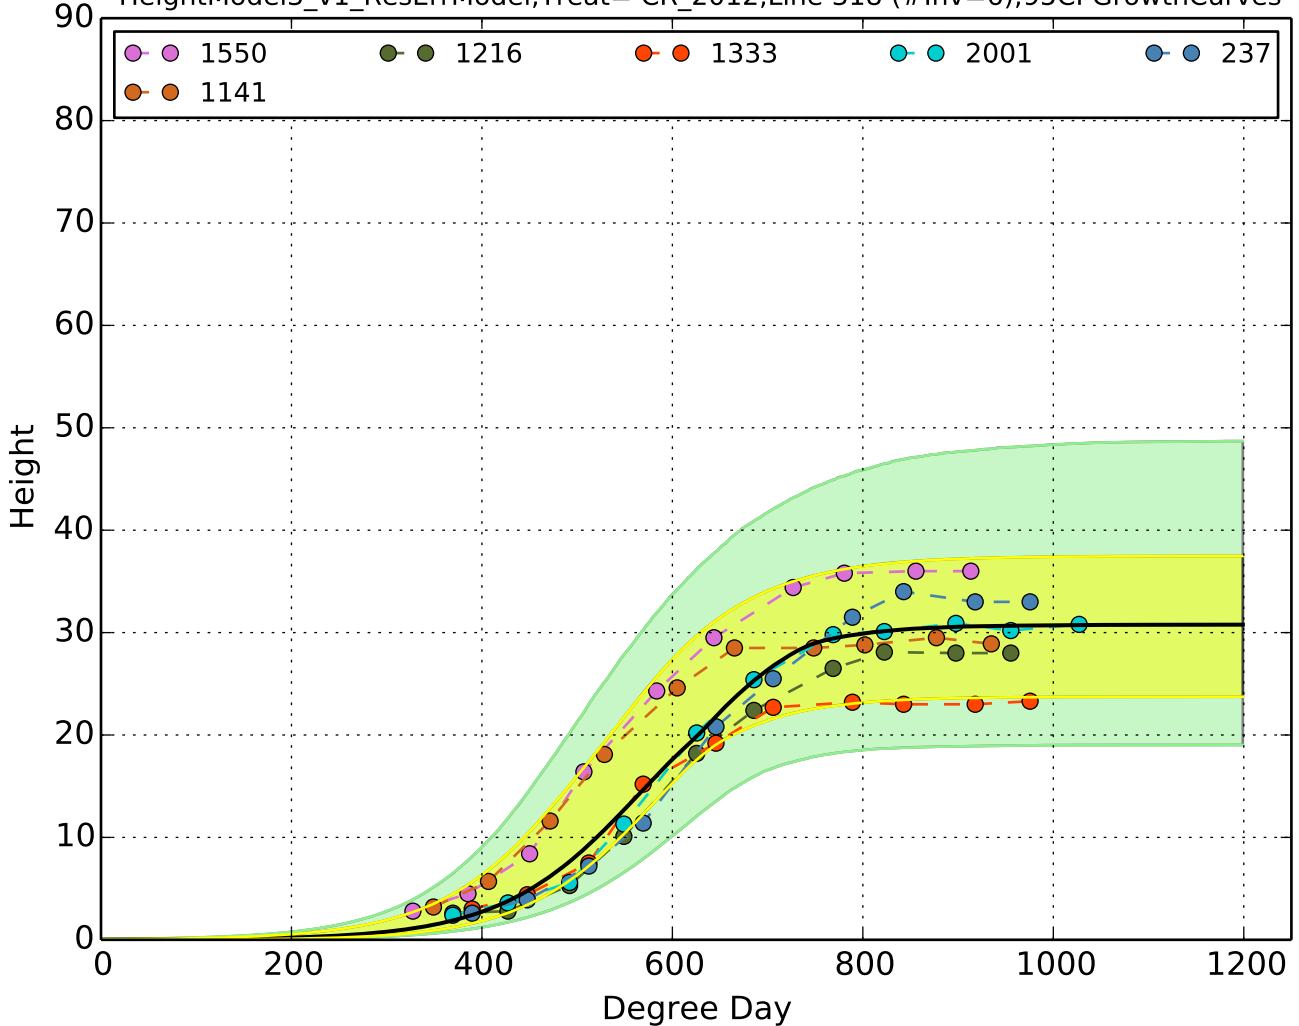

HeightModel3\_v1\_ResErrModel,Treat= CR\_2012,Line 325 (#Inv=8);95CI GrowthCurves

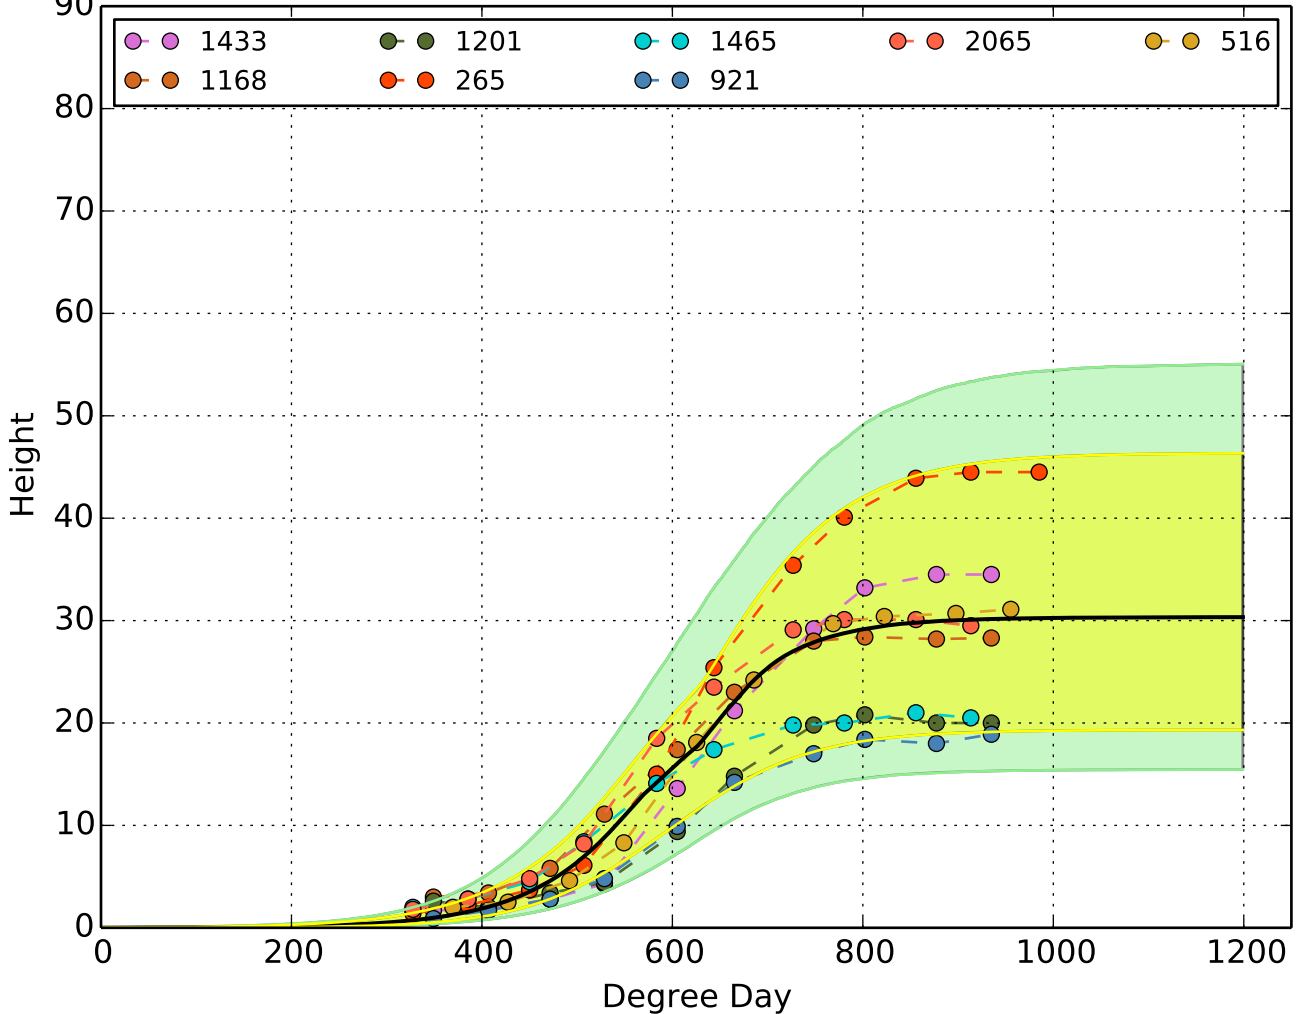

HeightModel3\_v1\_ResErrModel,Treat= CR\_2012,Line 328 (#Inv=6);95CI GrowthCurves

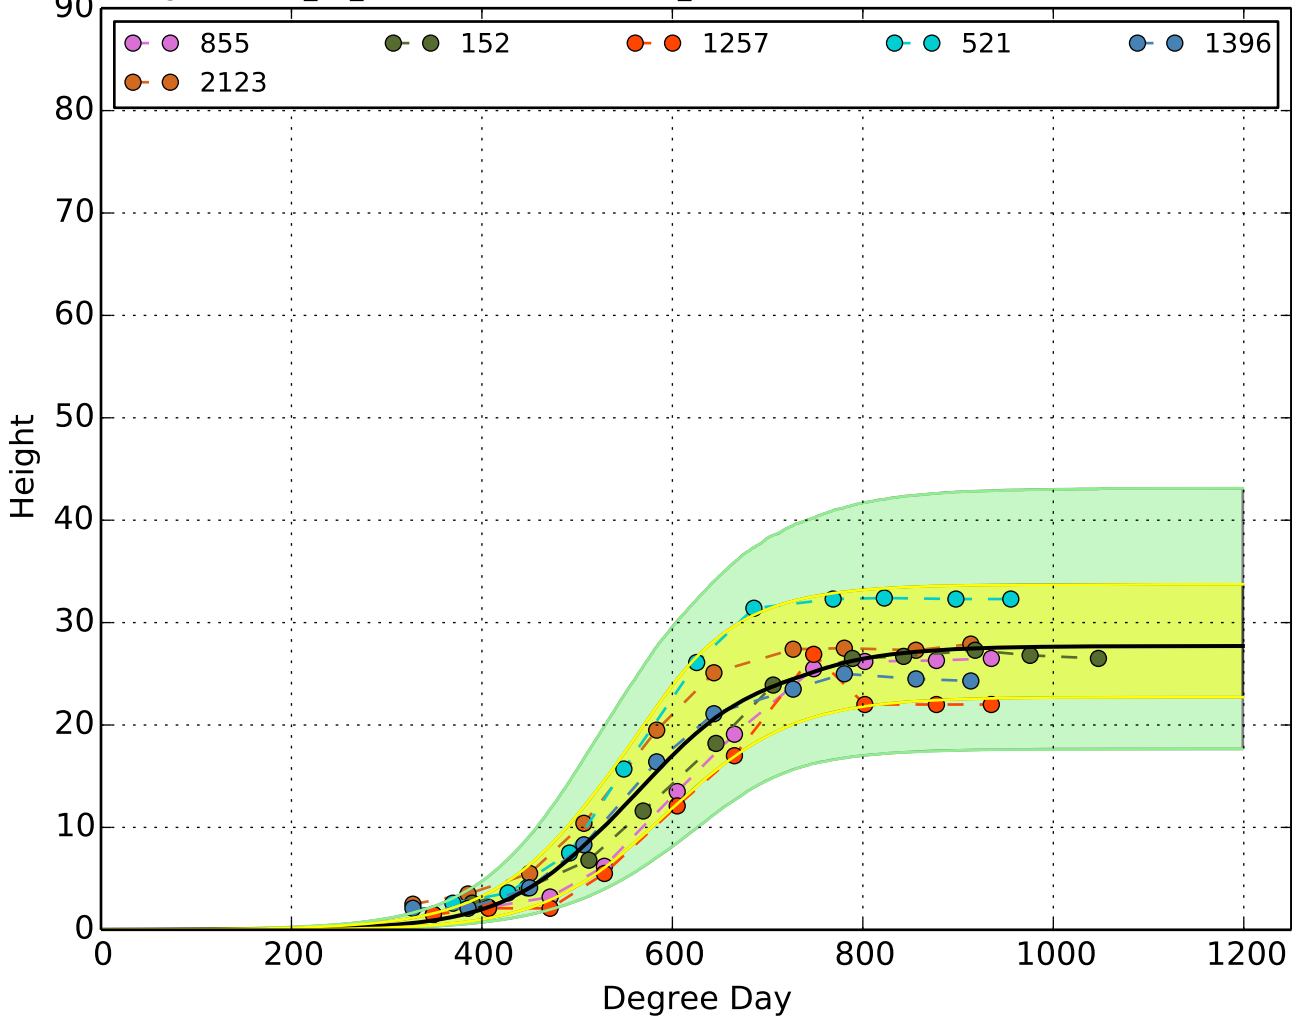

HeightModel3\_v1\_ResErrModel,Treat= CR\_2012,Line 332 (#Inv=8);95CI GrowthCurves

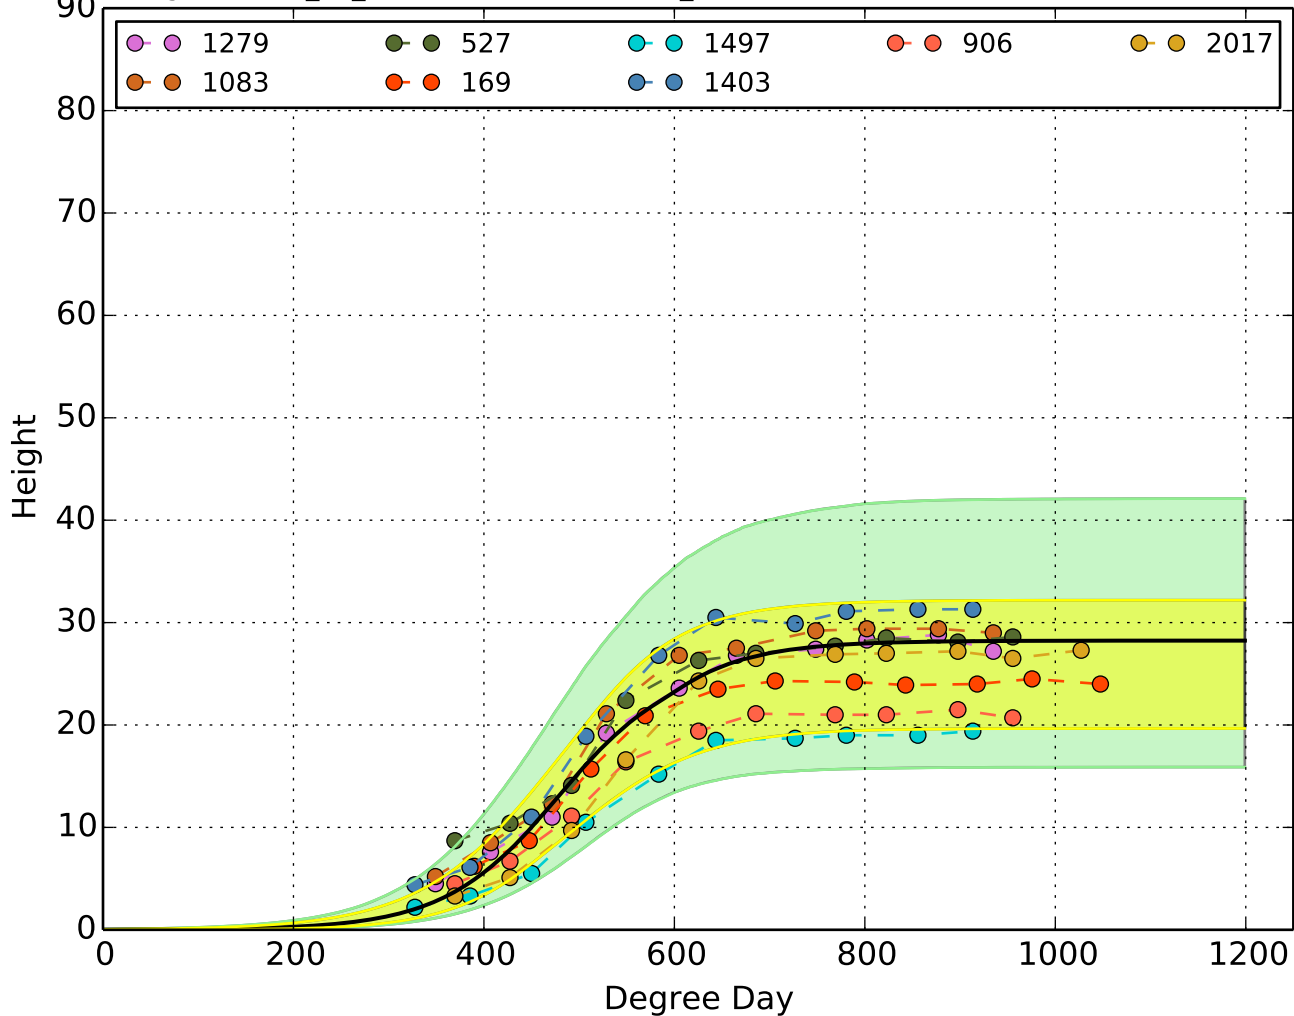



HeightModel3\_v1\_ResErrModel,Treat= CR\_2012,Line 337 (#Inv=8);95CI GrowthCurves

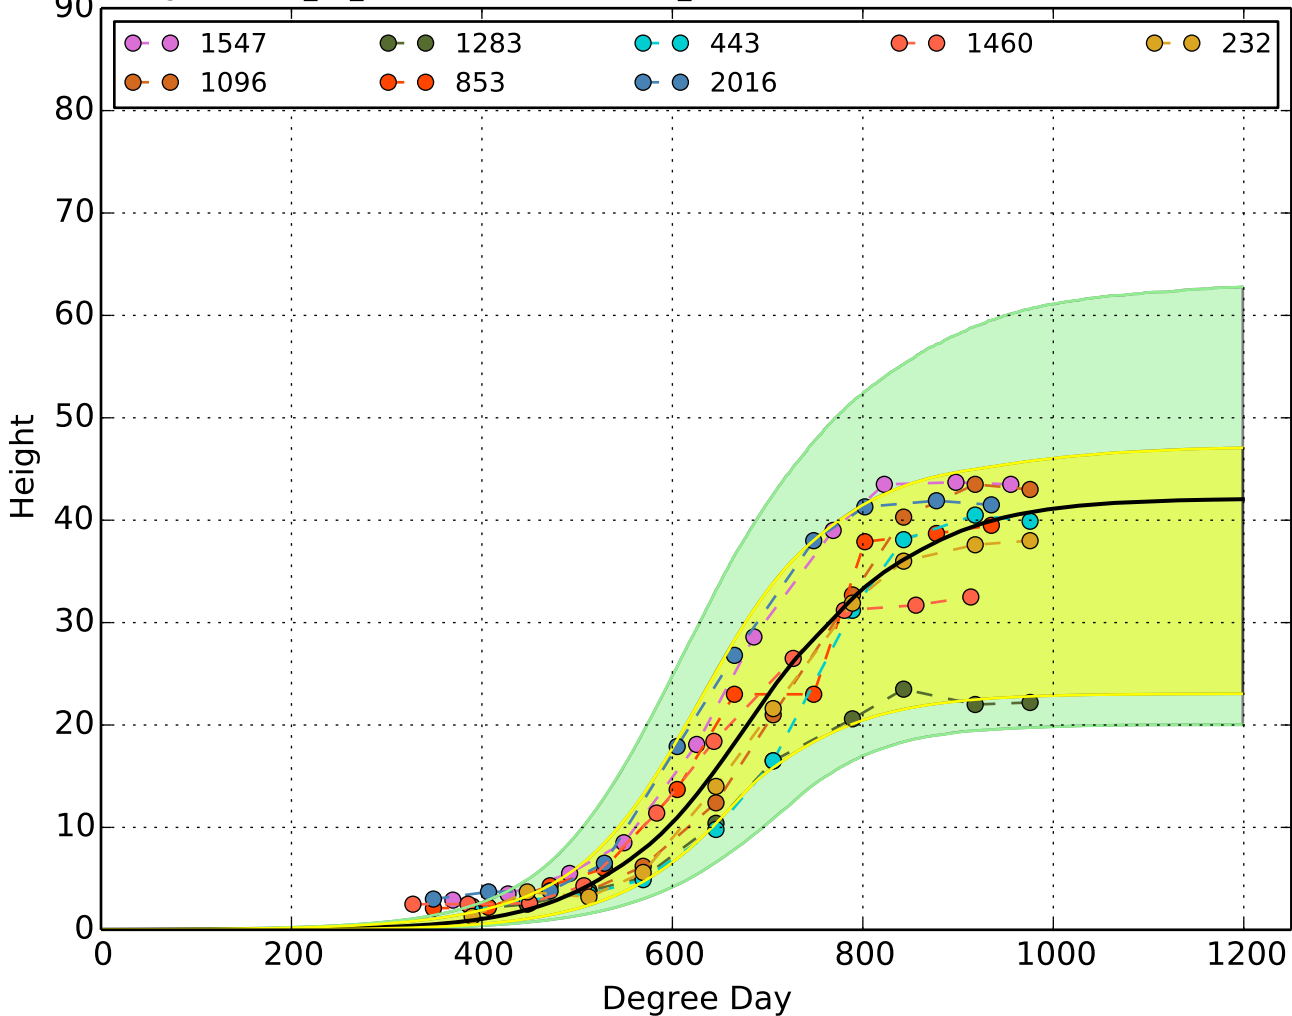

HeightModel3\_v1\_ResErrModel,Treat= CR\_2012,Line 339 (#Inv=21);95CI GrowthCurves

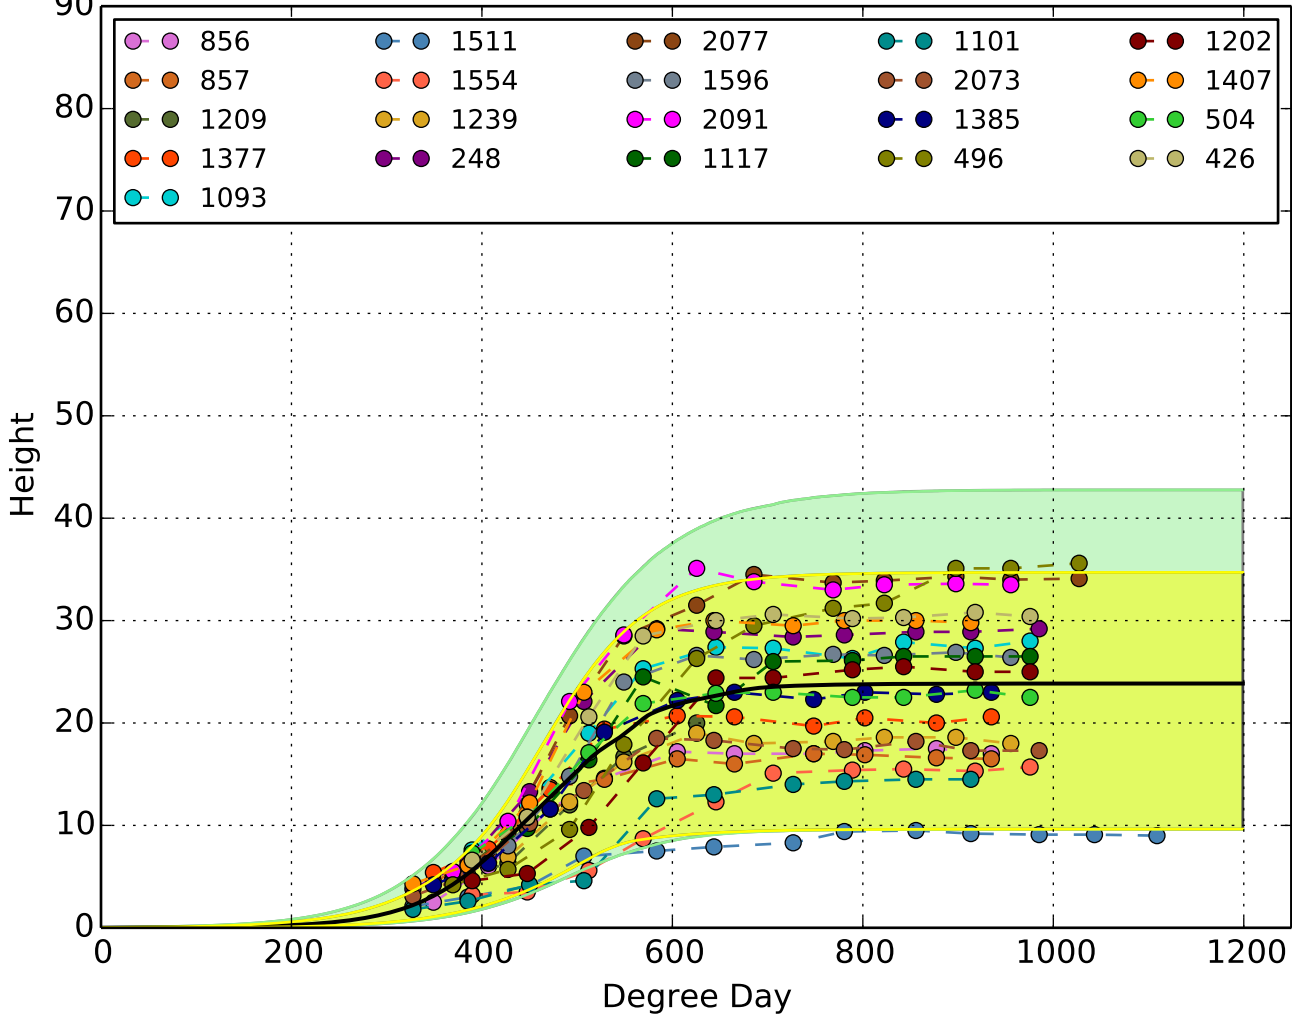

HeightModel3\_v1\_ResErrModel,Treat= CR\_2012,Line 340 (#Inv=7);95CI GrowthCurves

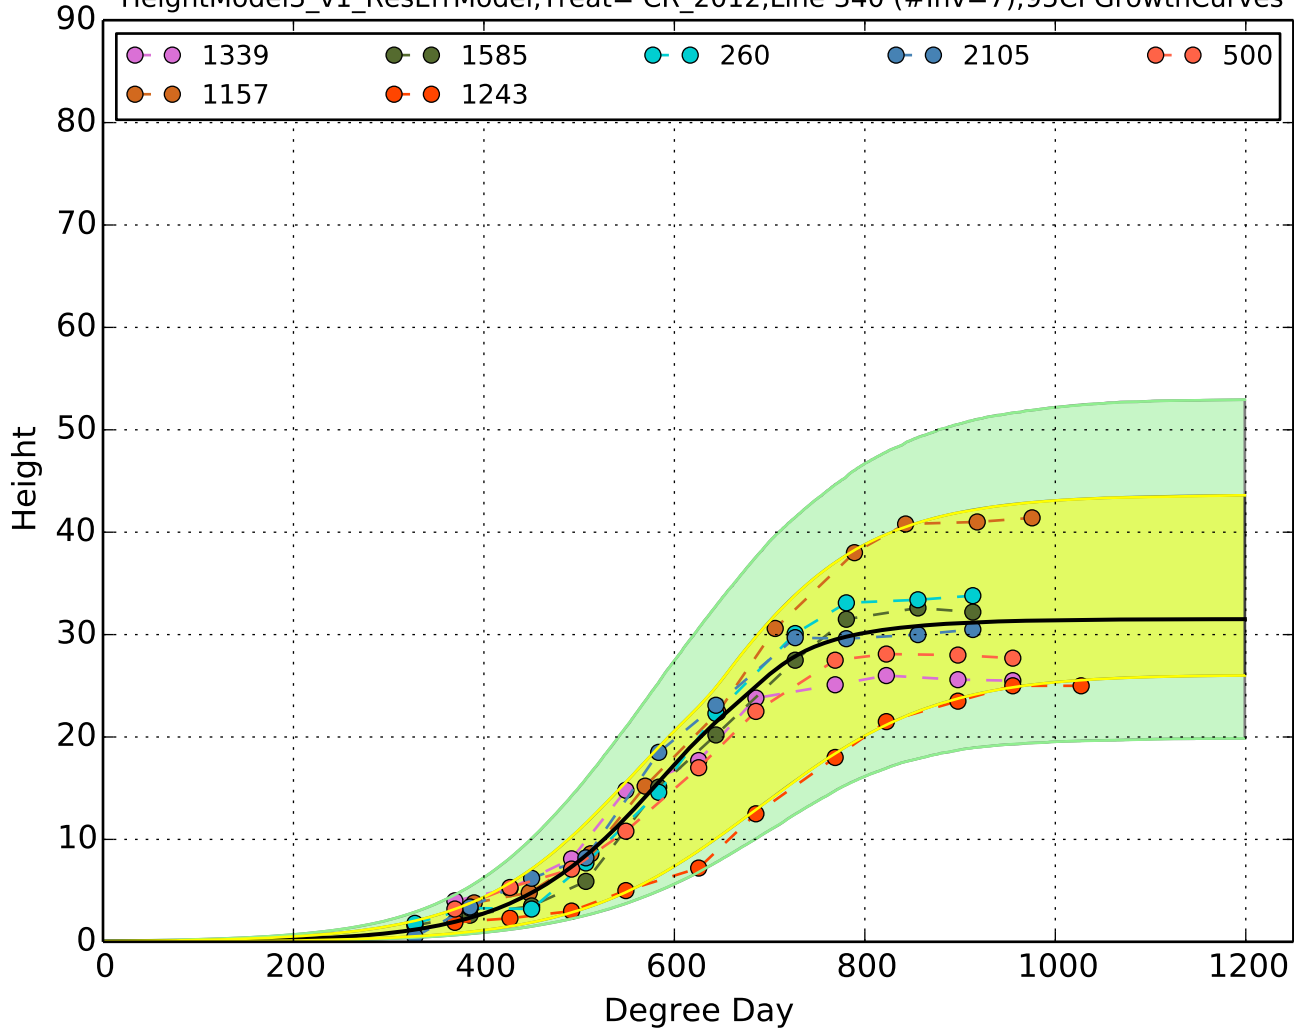

HeightModel3\_v1\_ResErrModel,Treat= CR\_2012,Line 341 (#Inv=6);95CI GrowthCurves

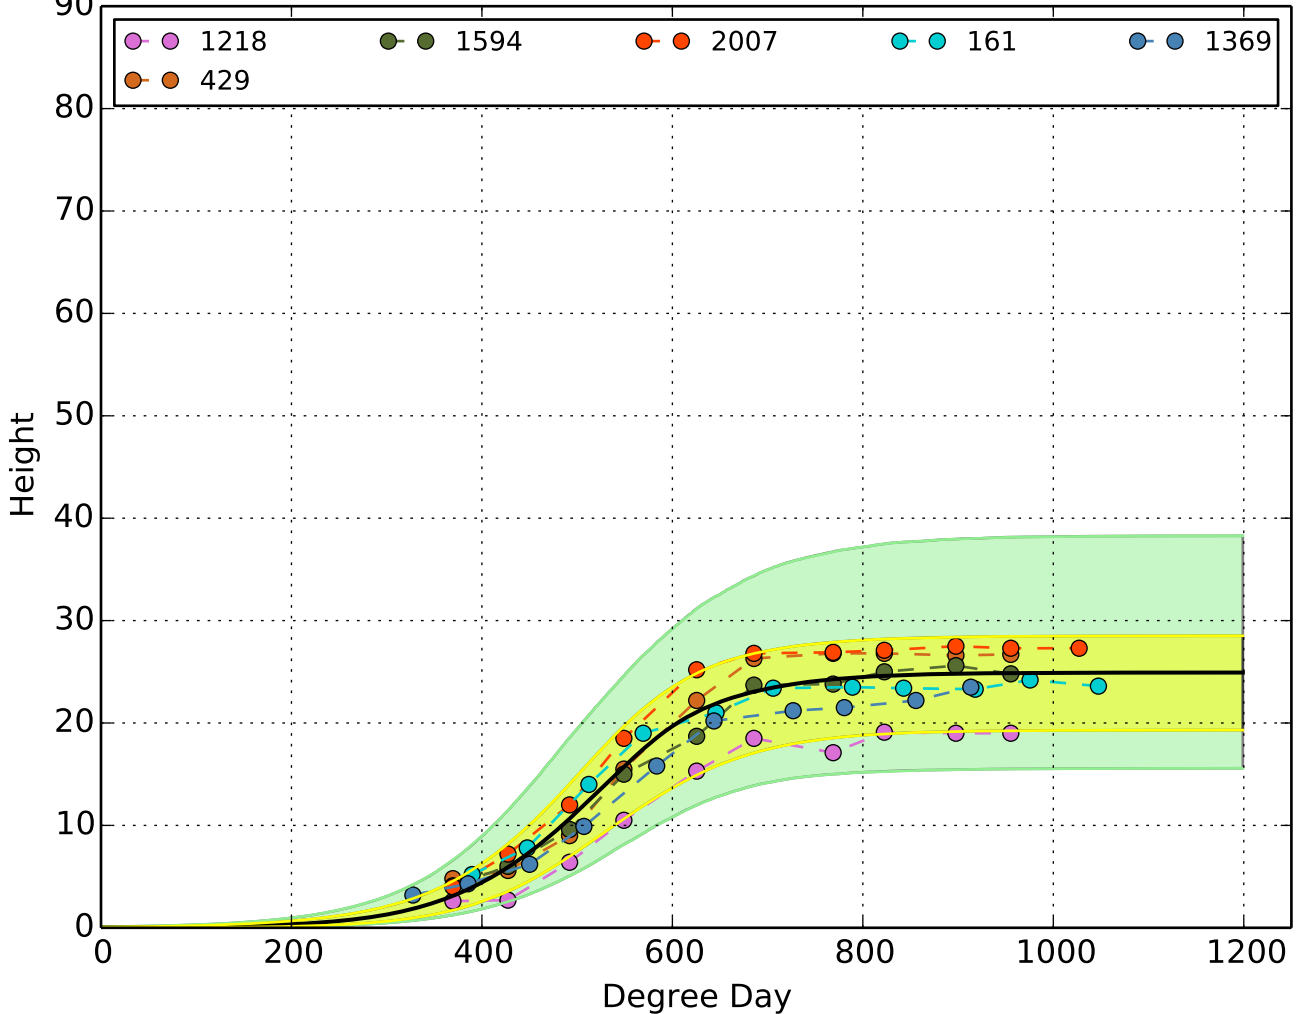

HeightModel3\_v1\_ResErrModel,Treat= CR\_2012,Line 344 (#Inv=7);95CI GrowthCurves

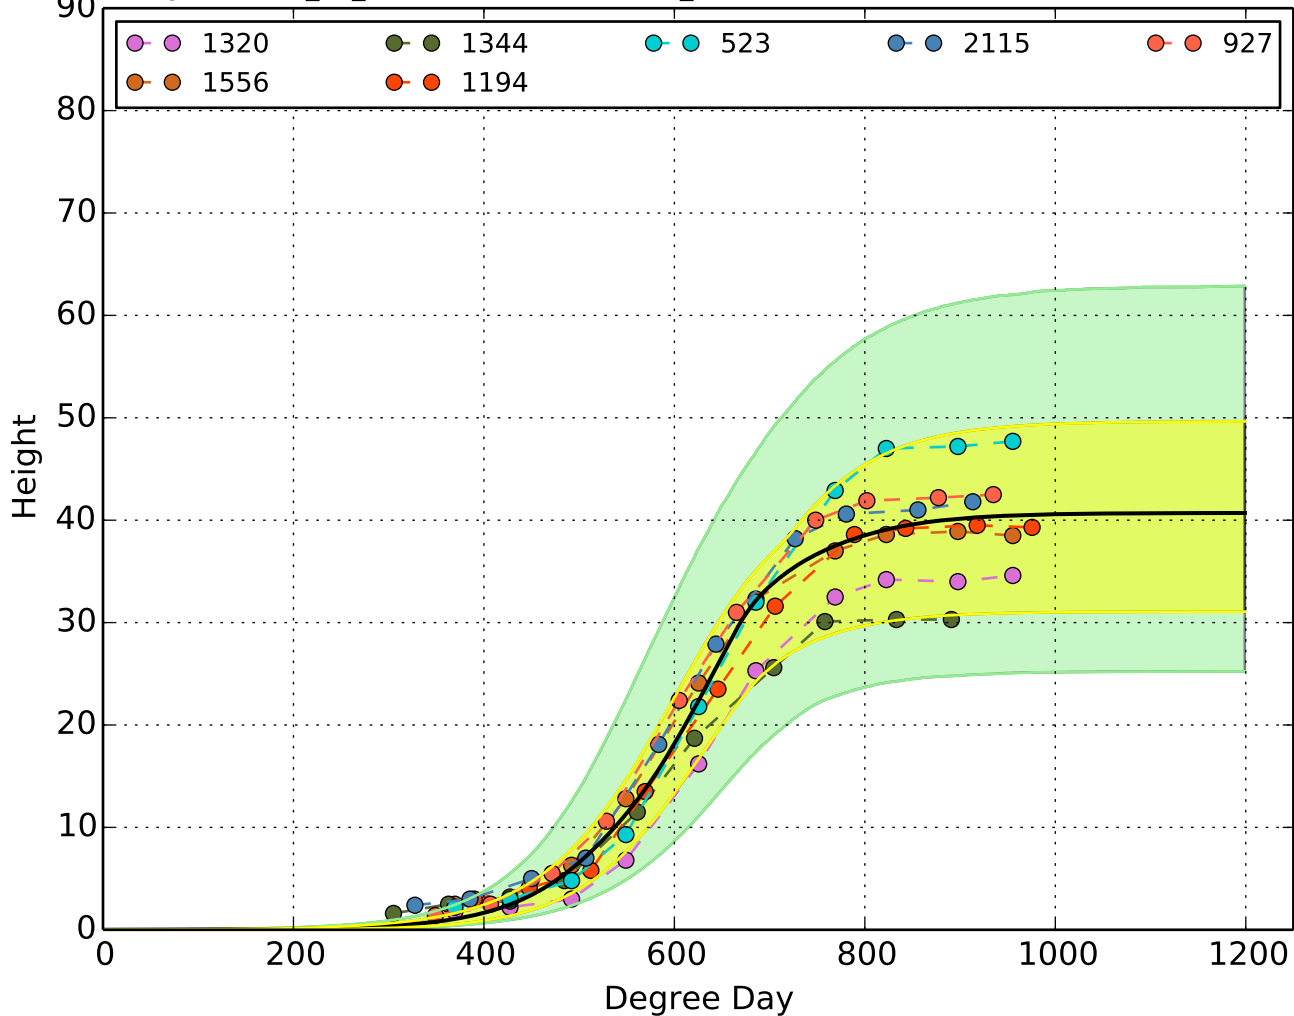

HeightModel3\_v1\_ResErrModel,Treat= CR\_2012,Line 346 (#Inv=5);95CI GrowthCurves

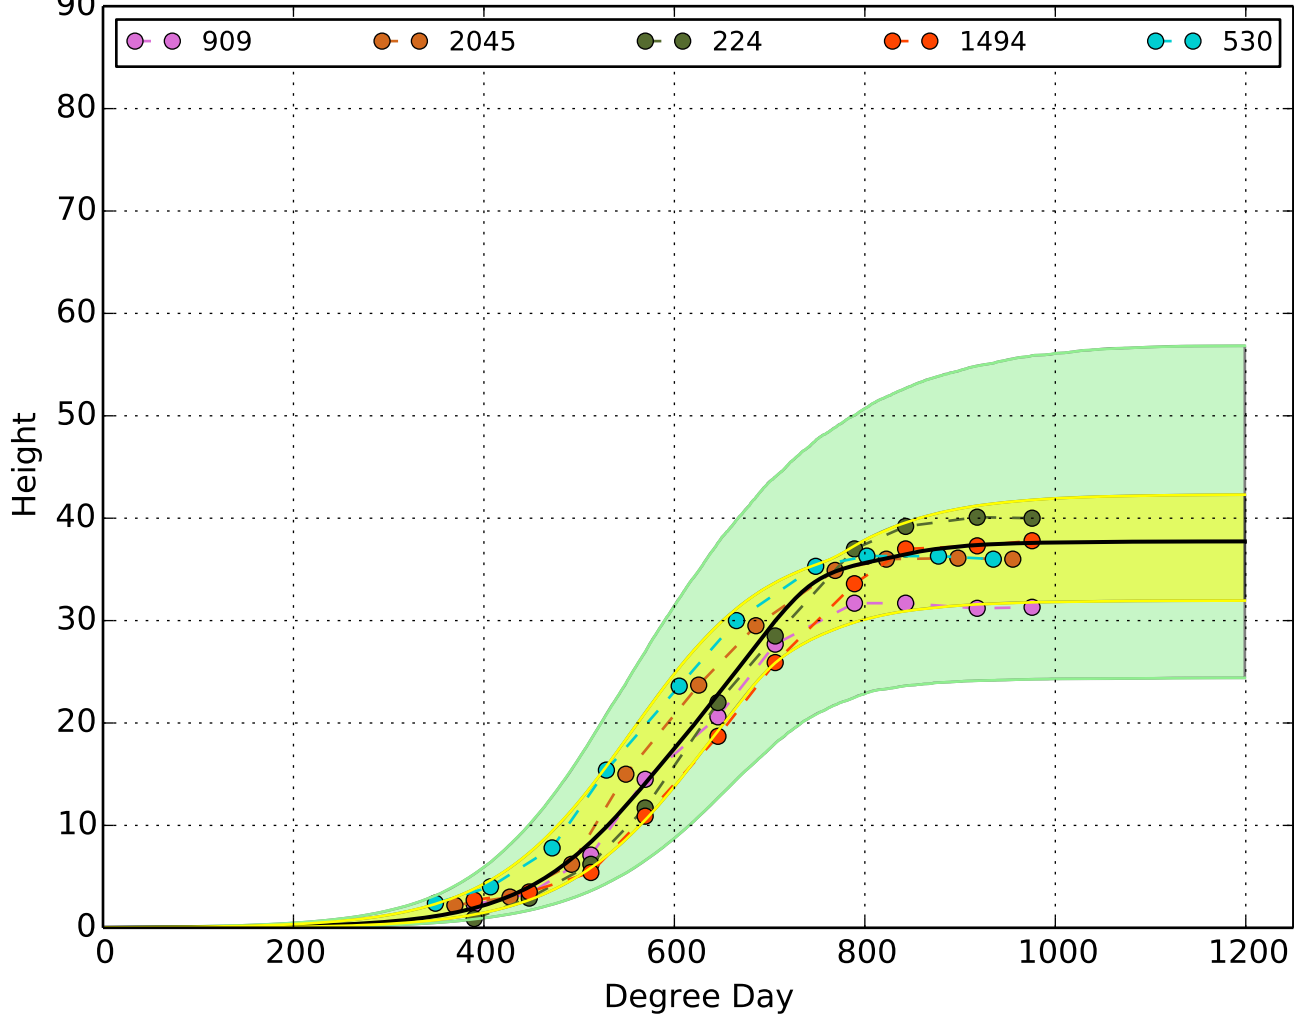

HeightModel3\_v1\_ResErrModel,Treat= CR\_2012,Line 347 (#Inv=13);95CI GrowthCurves

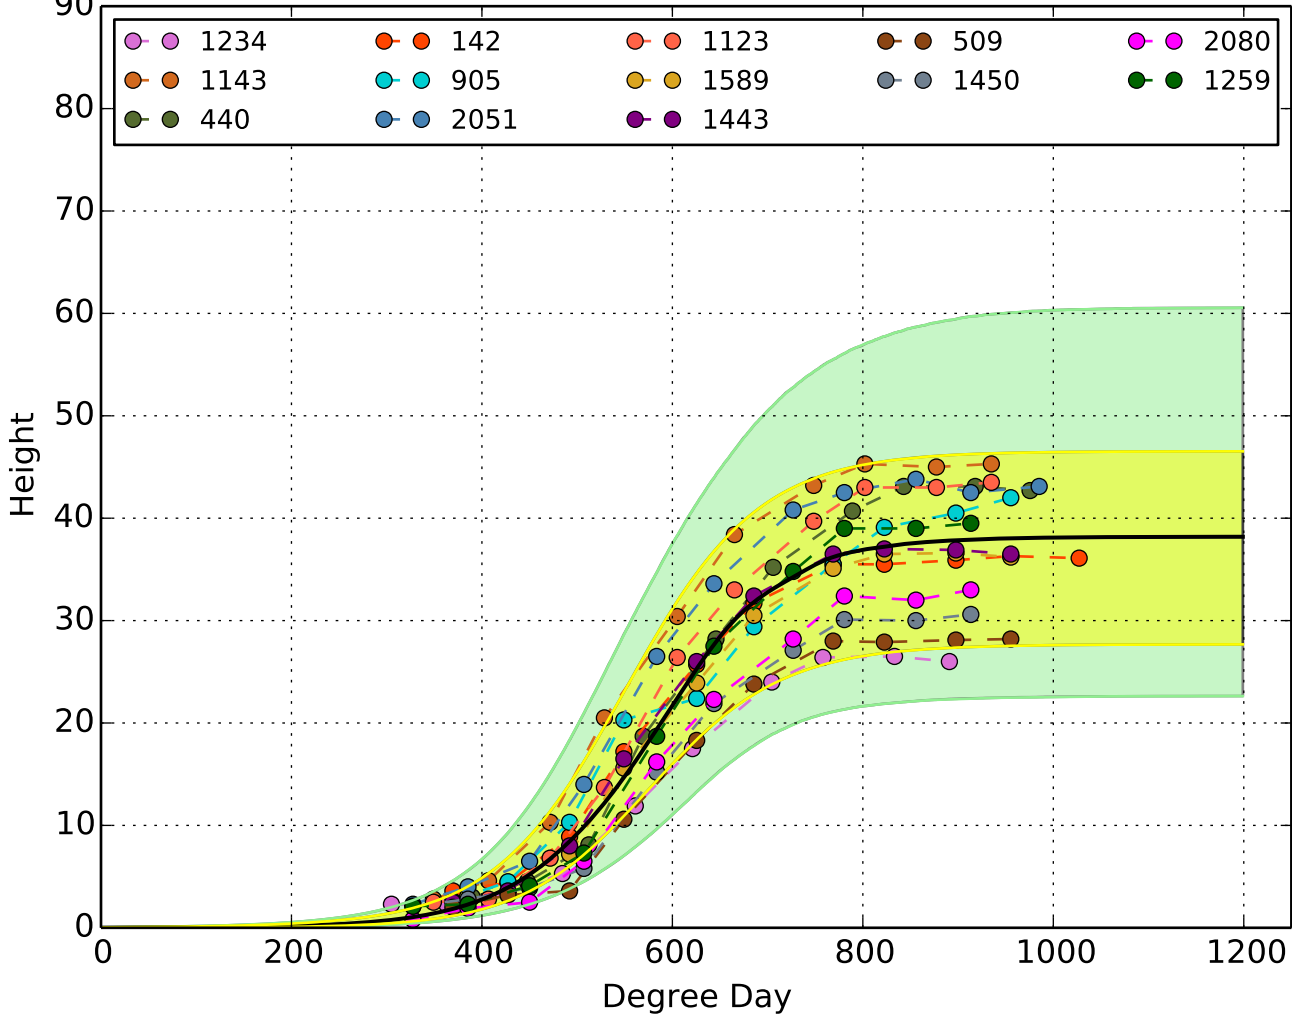

HeightModel3\_v1\_ResErrModel,Treat= CR\_2012,Line 353 (#Inv=6);95CI GrowthCurves

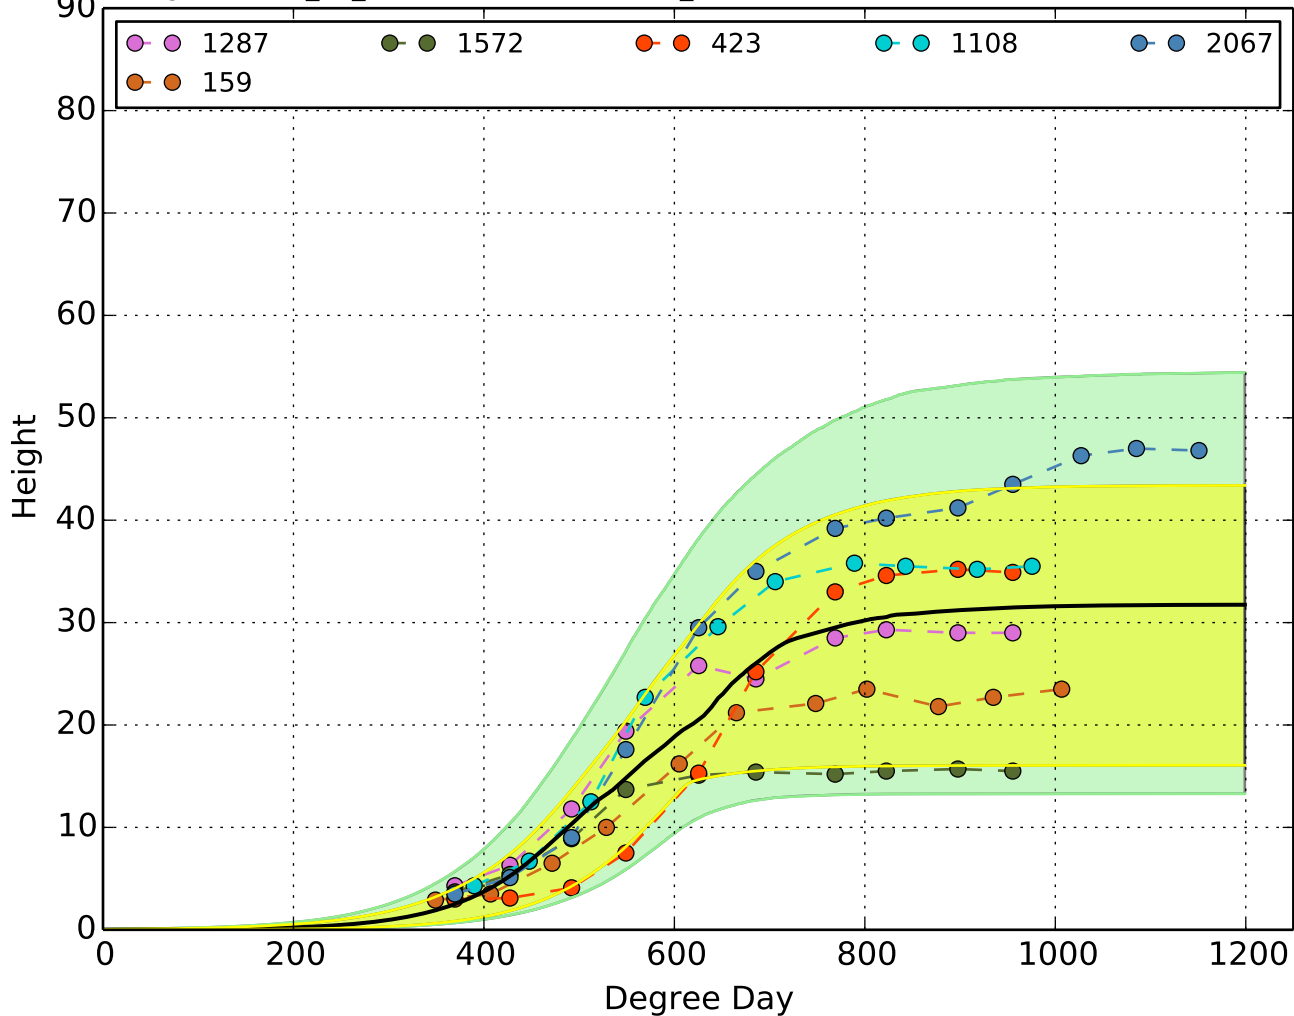



HeightModel3\_v1\_ResErrModel,Treat= CR\_2012,Line 354 (#Inv=8);95CI GrowthCurves

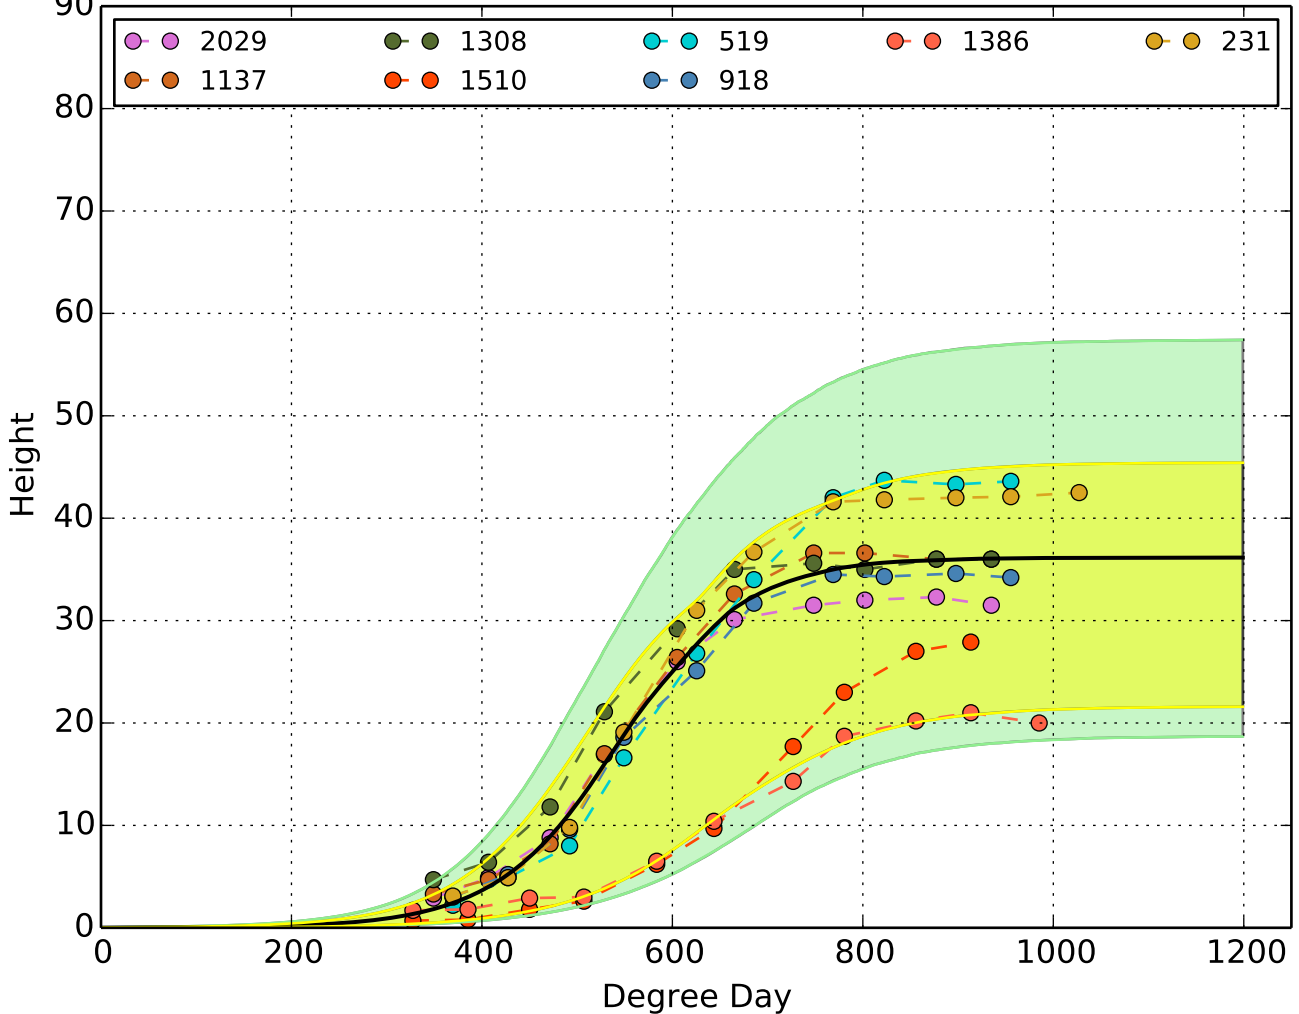

HeightModel3\_v1\_ResErrModel,Treat= CR\_2012,Line 355 (#Inv=7);95CI GrowthCurves

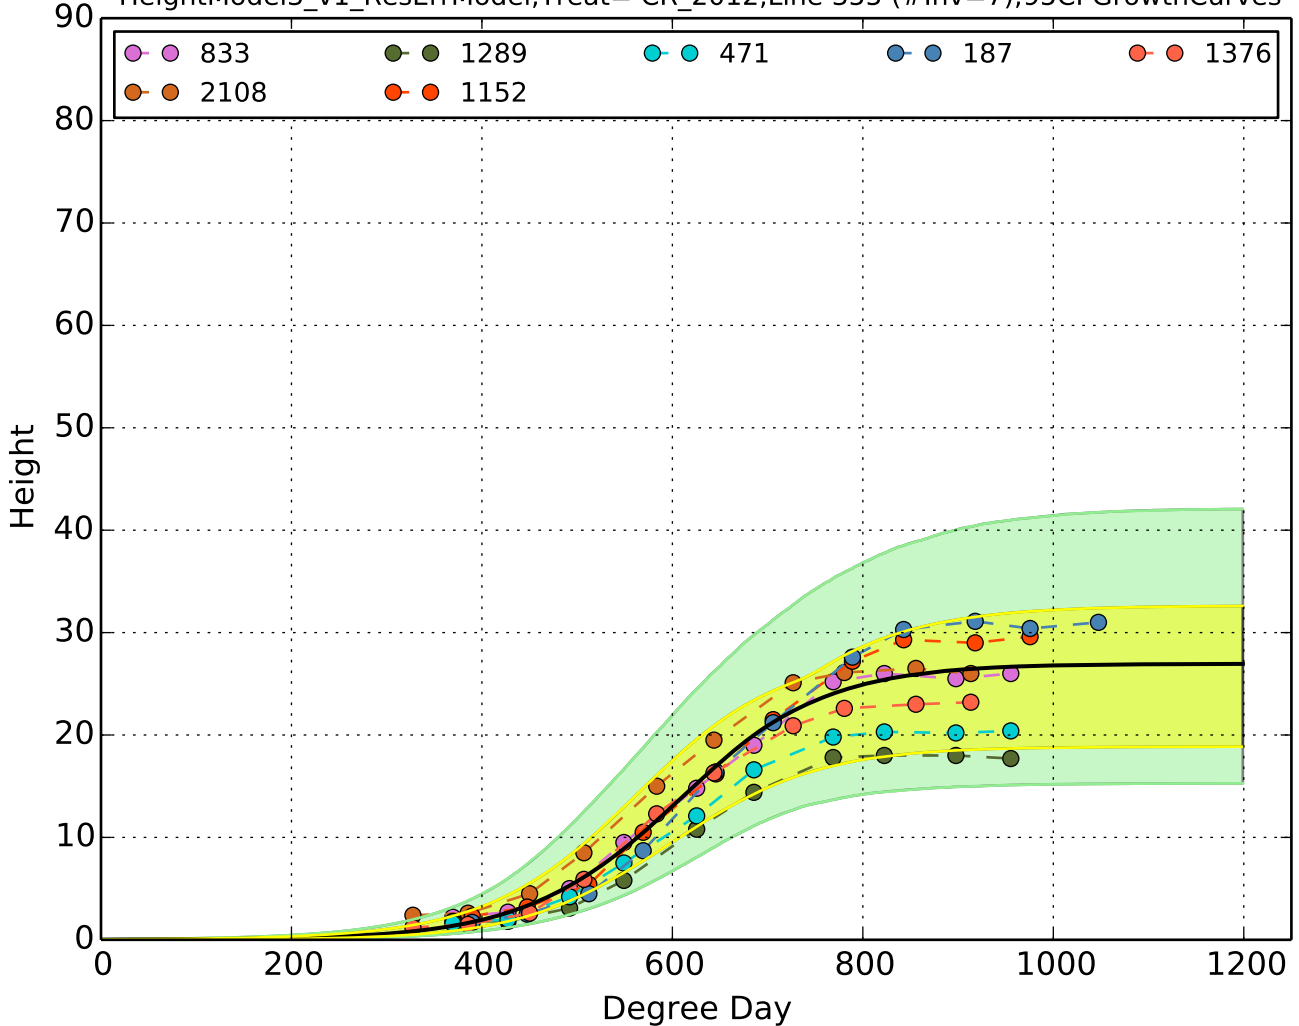

HeightModel3\_v1\_ResErrModel,Treat= CR\_2012,Line 357 (#Inv=6);95CI GrowthCurves

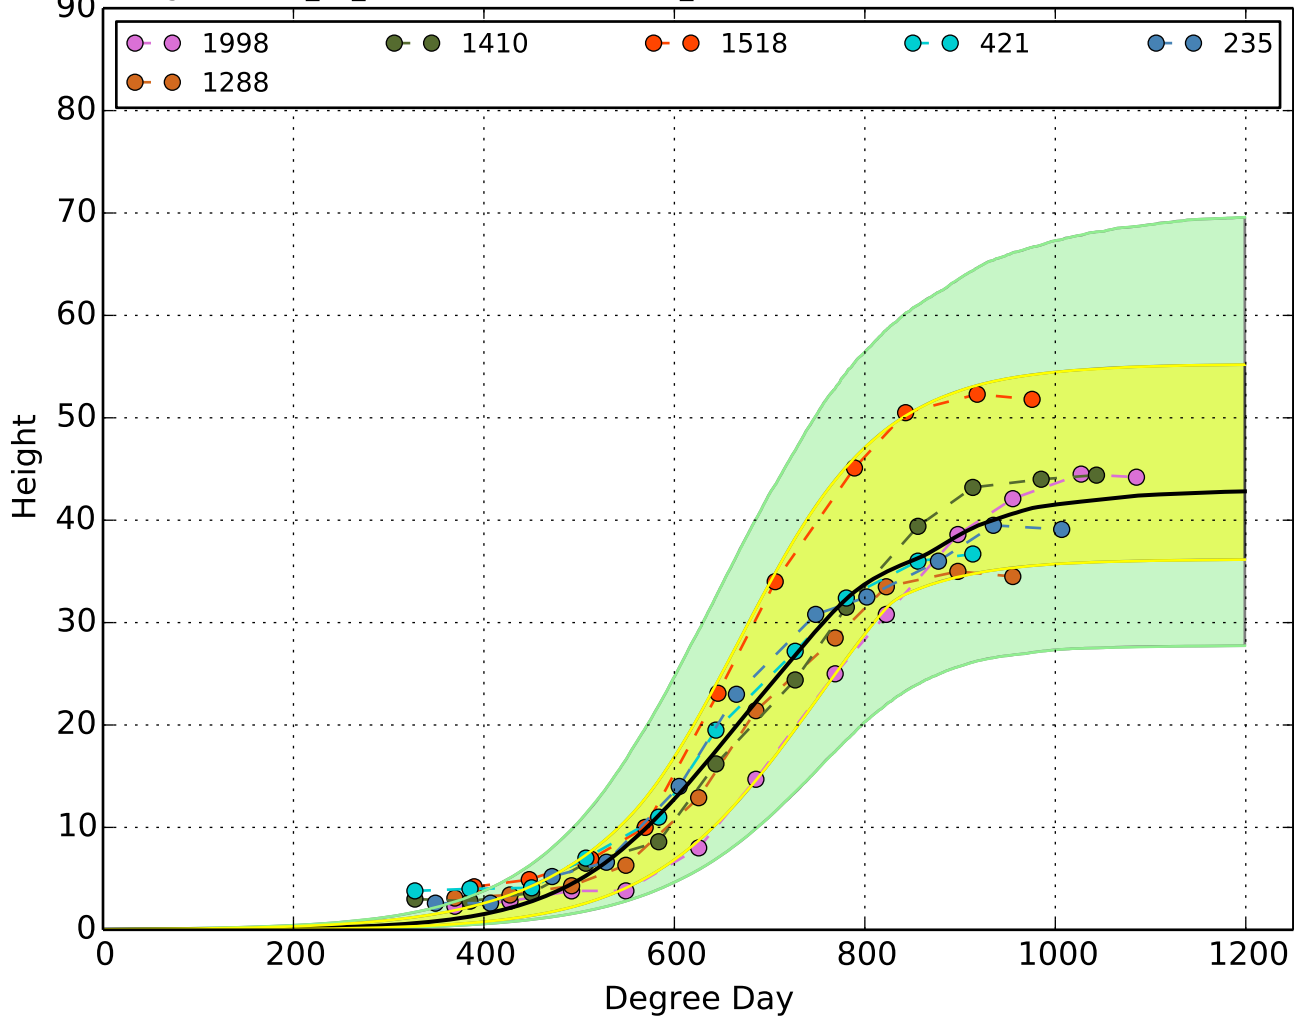

HeightModel3\_v1\_ResErrModel,Treat= CR\_2012,Line 359 (#Inv=6);95CI GrowthCurves

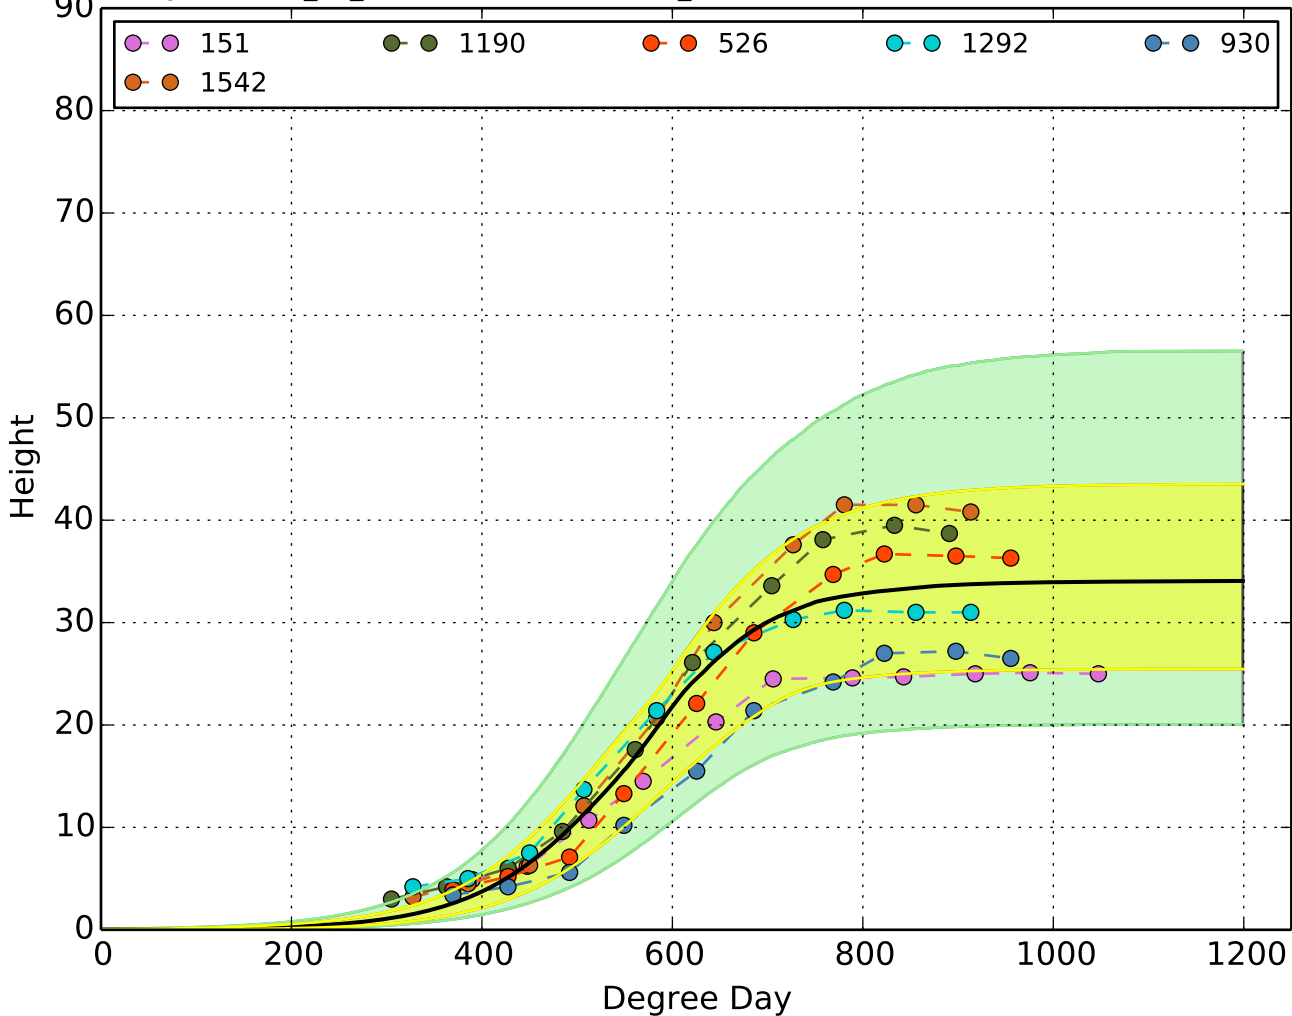

HeightModel3\_v1\_ResErrModel,Treat= CR\_2012,Line 360 (#Inv=7);95CI GrowthCurves

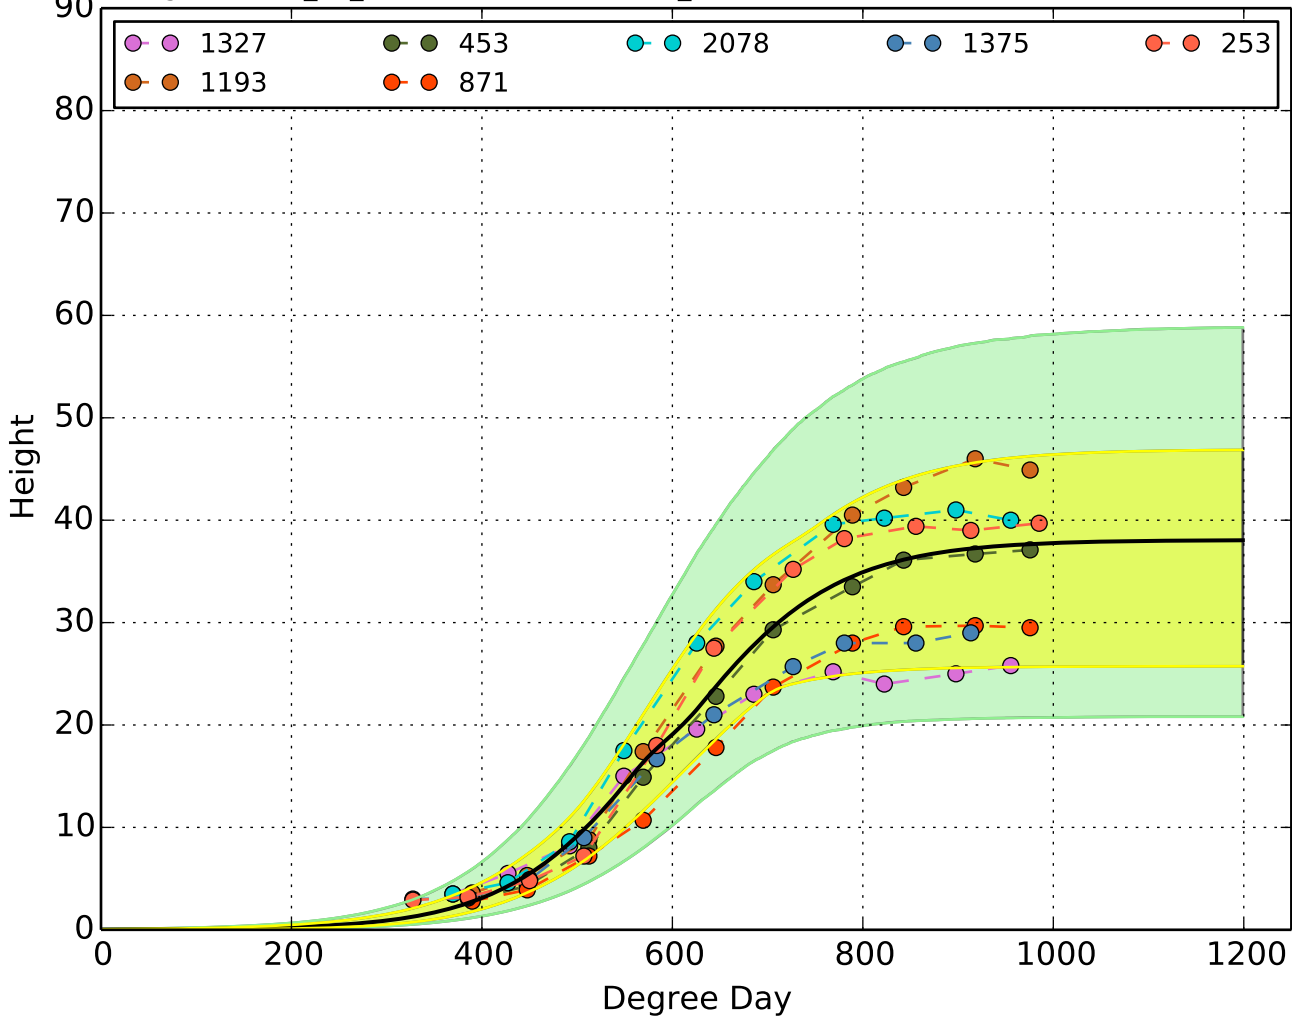

HeightModel3\_v1\_ResErrModel,Treat= CR\_2012,Line 363 (#Inv=8);95CI GrowthCurves

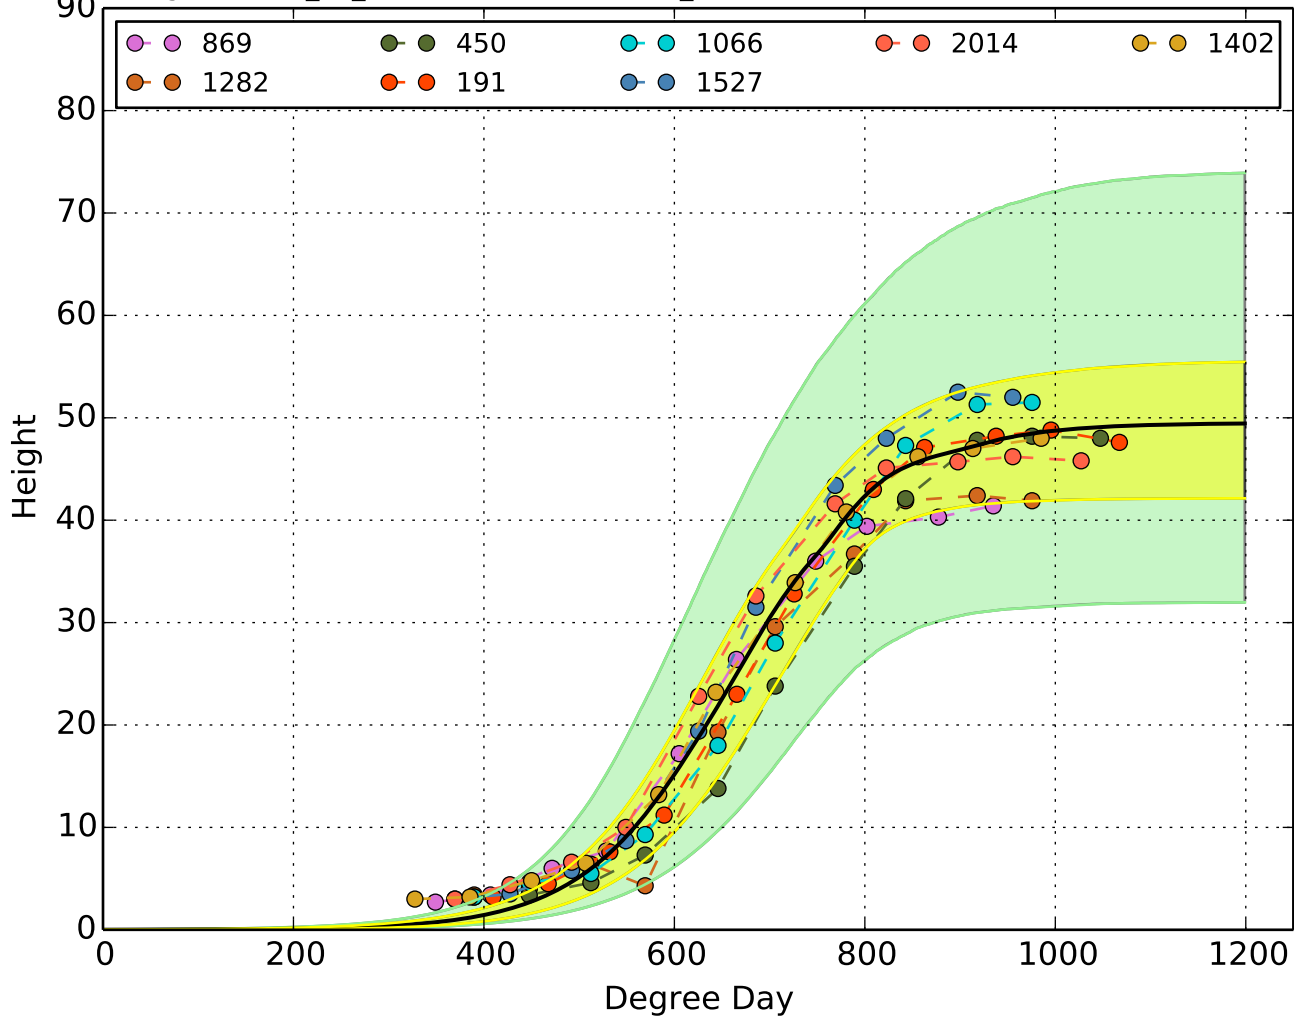

HeightModel3\_v1\_ResErrModel,Treat= CR\_2012,Line 373 (#Inv=7);95CI GrowthCurves

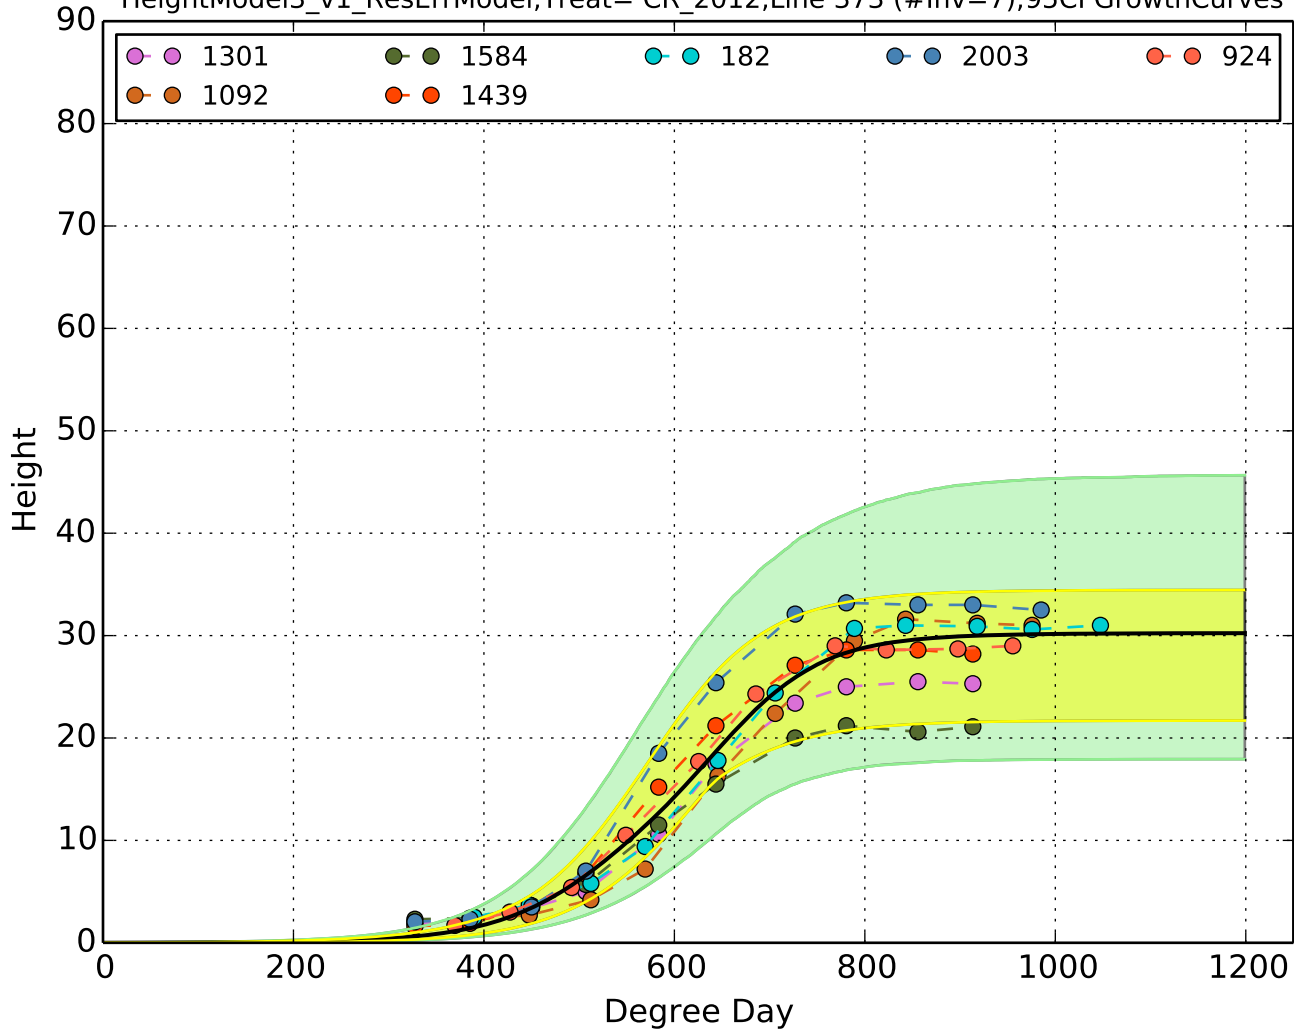

HeightModel3\_v1\_ResErrModel,Treat= CR\_2012,Line 376 (#Inv=5);95CI GrowthCurves

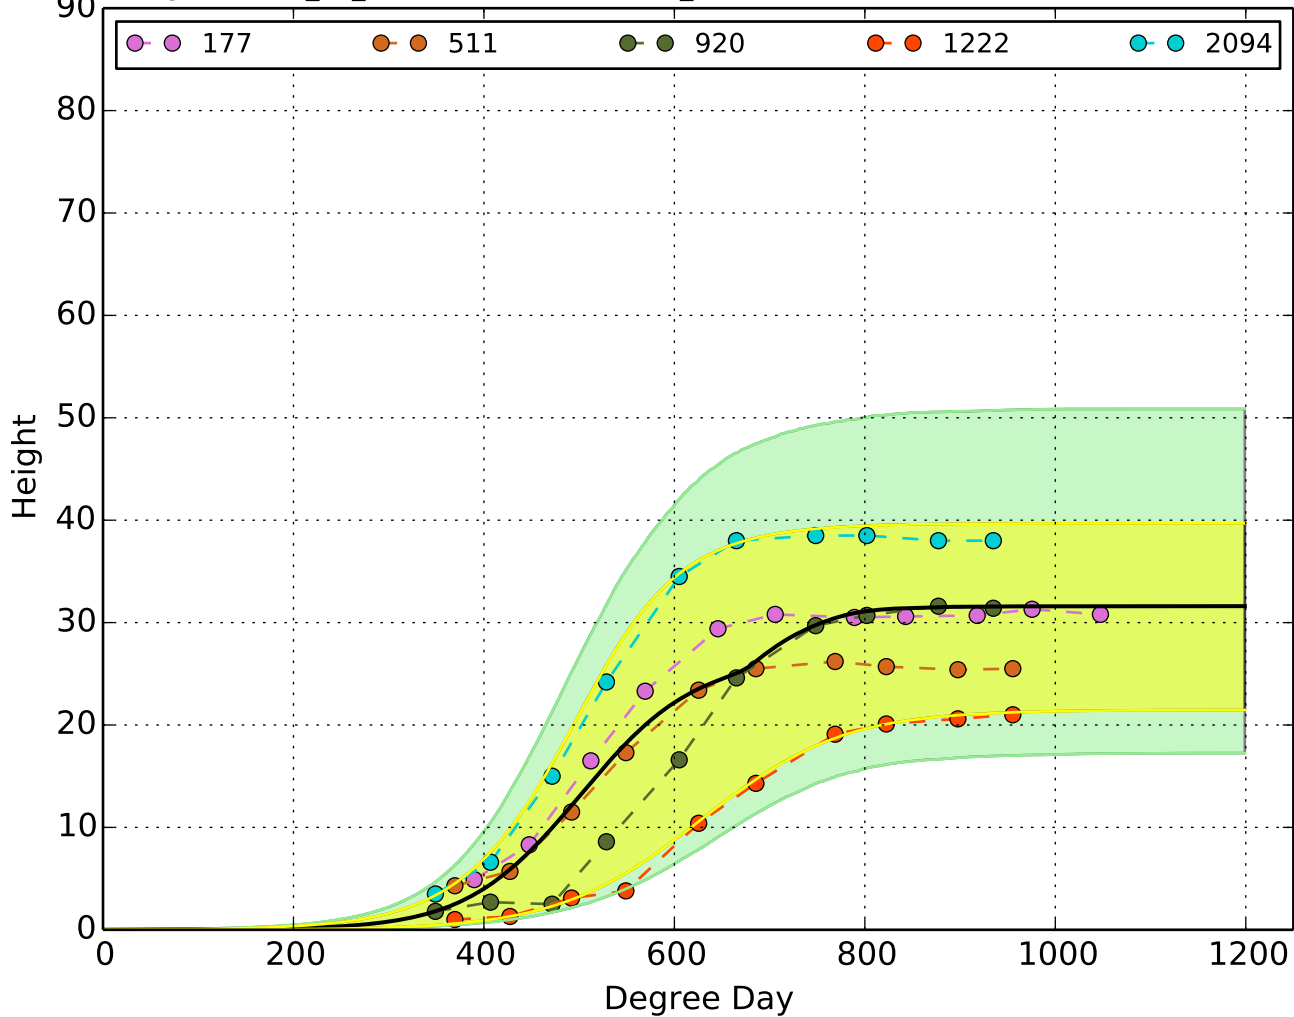



HeightModel3\_v1\_ResErrModel,Treat= CR\_2012,Line 380 (#Inv=8);95CI GrowthCurves

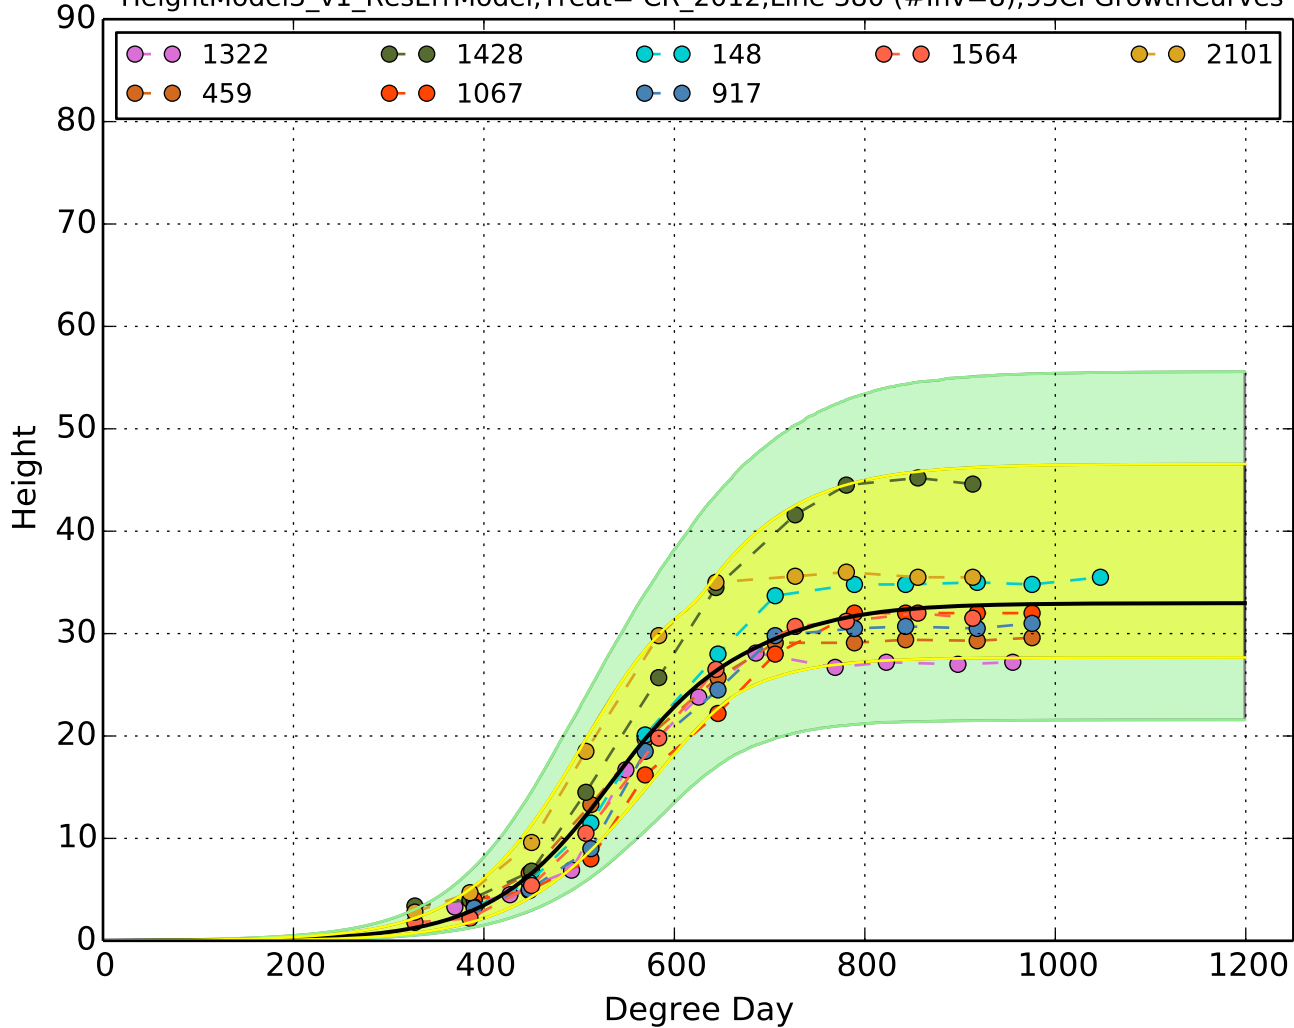

HeightModel3\_v1\_ResErrModel,Treat= CR\_2012,Line 500 (#Inv=8);95CI GrowthCurves

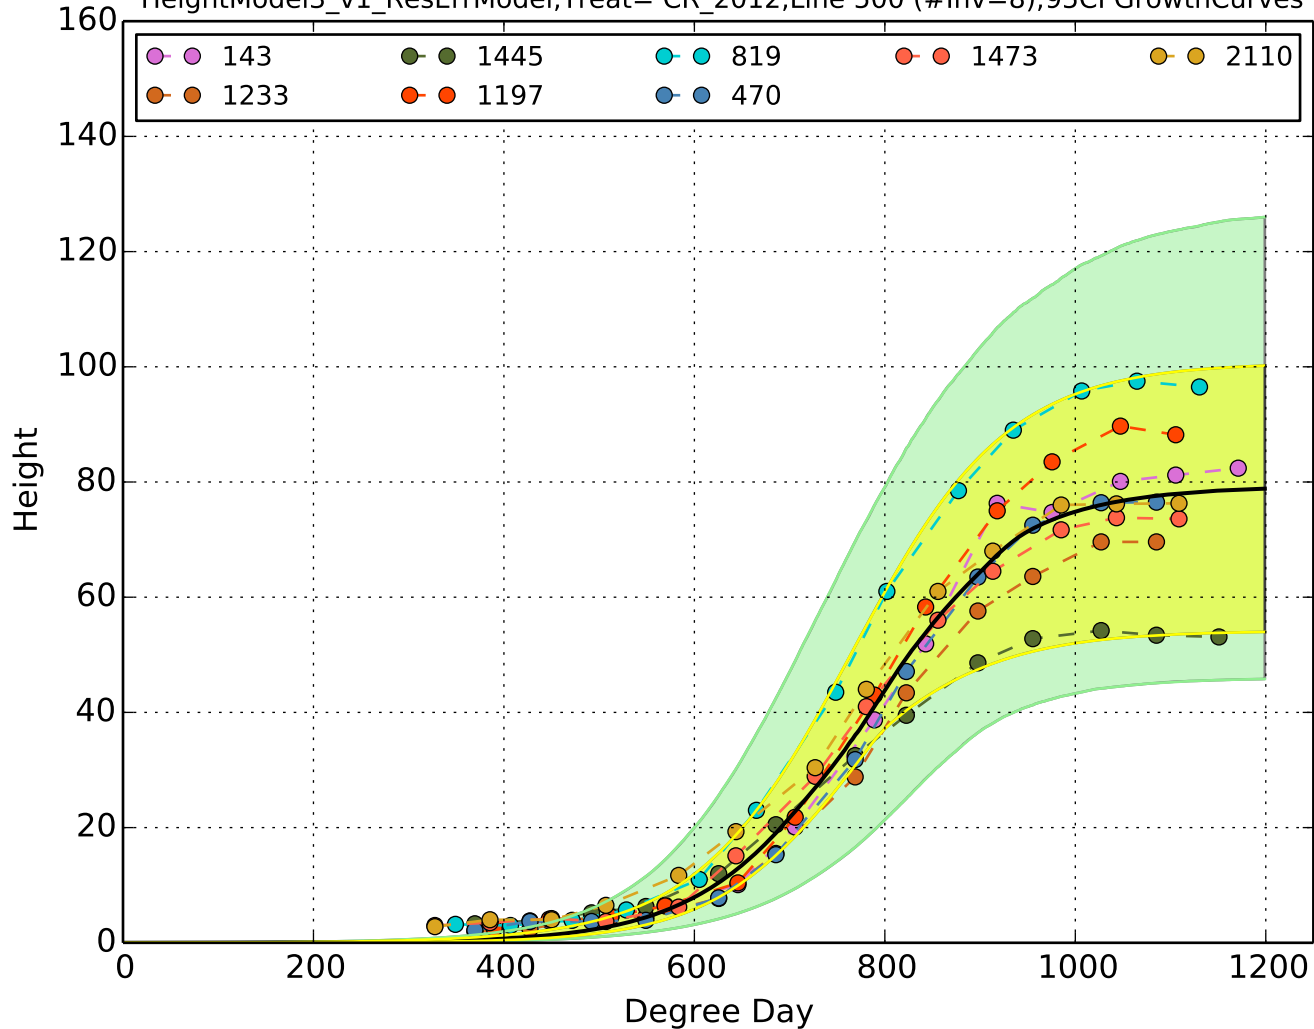

HeightModel3\_v1\_ResErrModel,Treat= CR\_2012,Line 511 (#Inv=8);95CI GrowthCurves

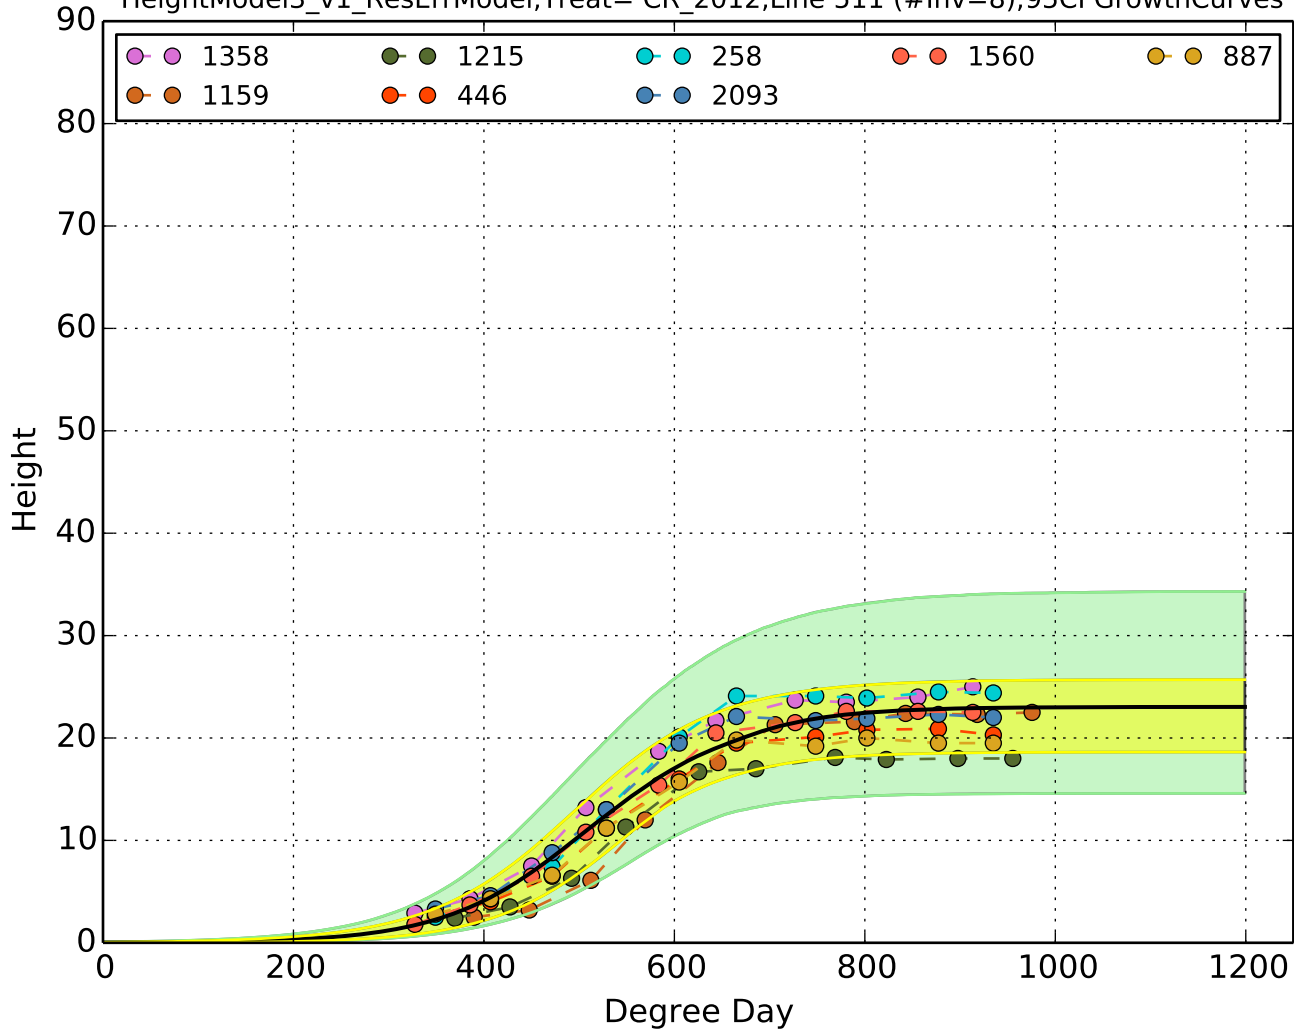

Supplement: pgen.1008367.s001.pdf [file pgen.1008367.s001.pdf]
