# Supplementary material for: Integrating transcriptomic network reconstruction and eQTL analyses reveals mechanistic connections between genomic architecture and Brassica rapa development
Source: PubMed Central journal article supplement (PMC6759183; doi:10.1371/journal.pgen.1008367), 2019-09-12

MR10

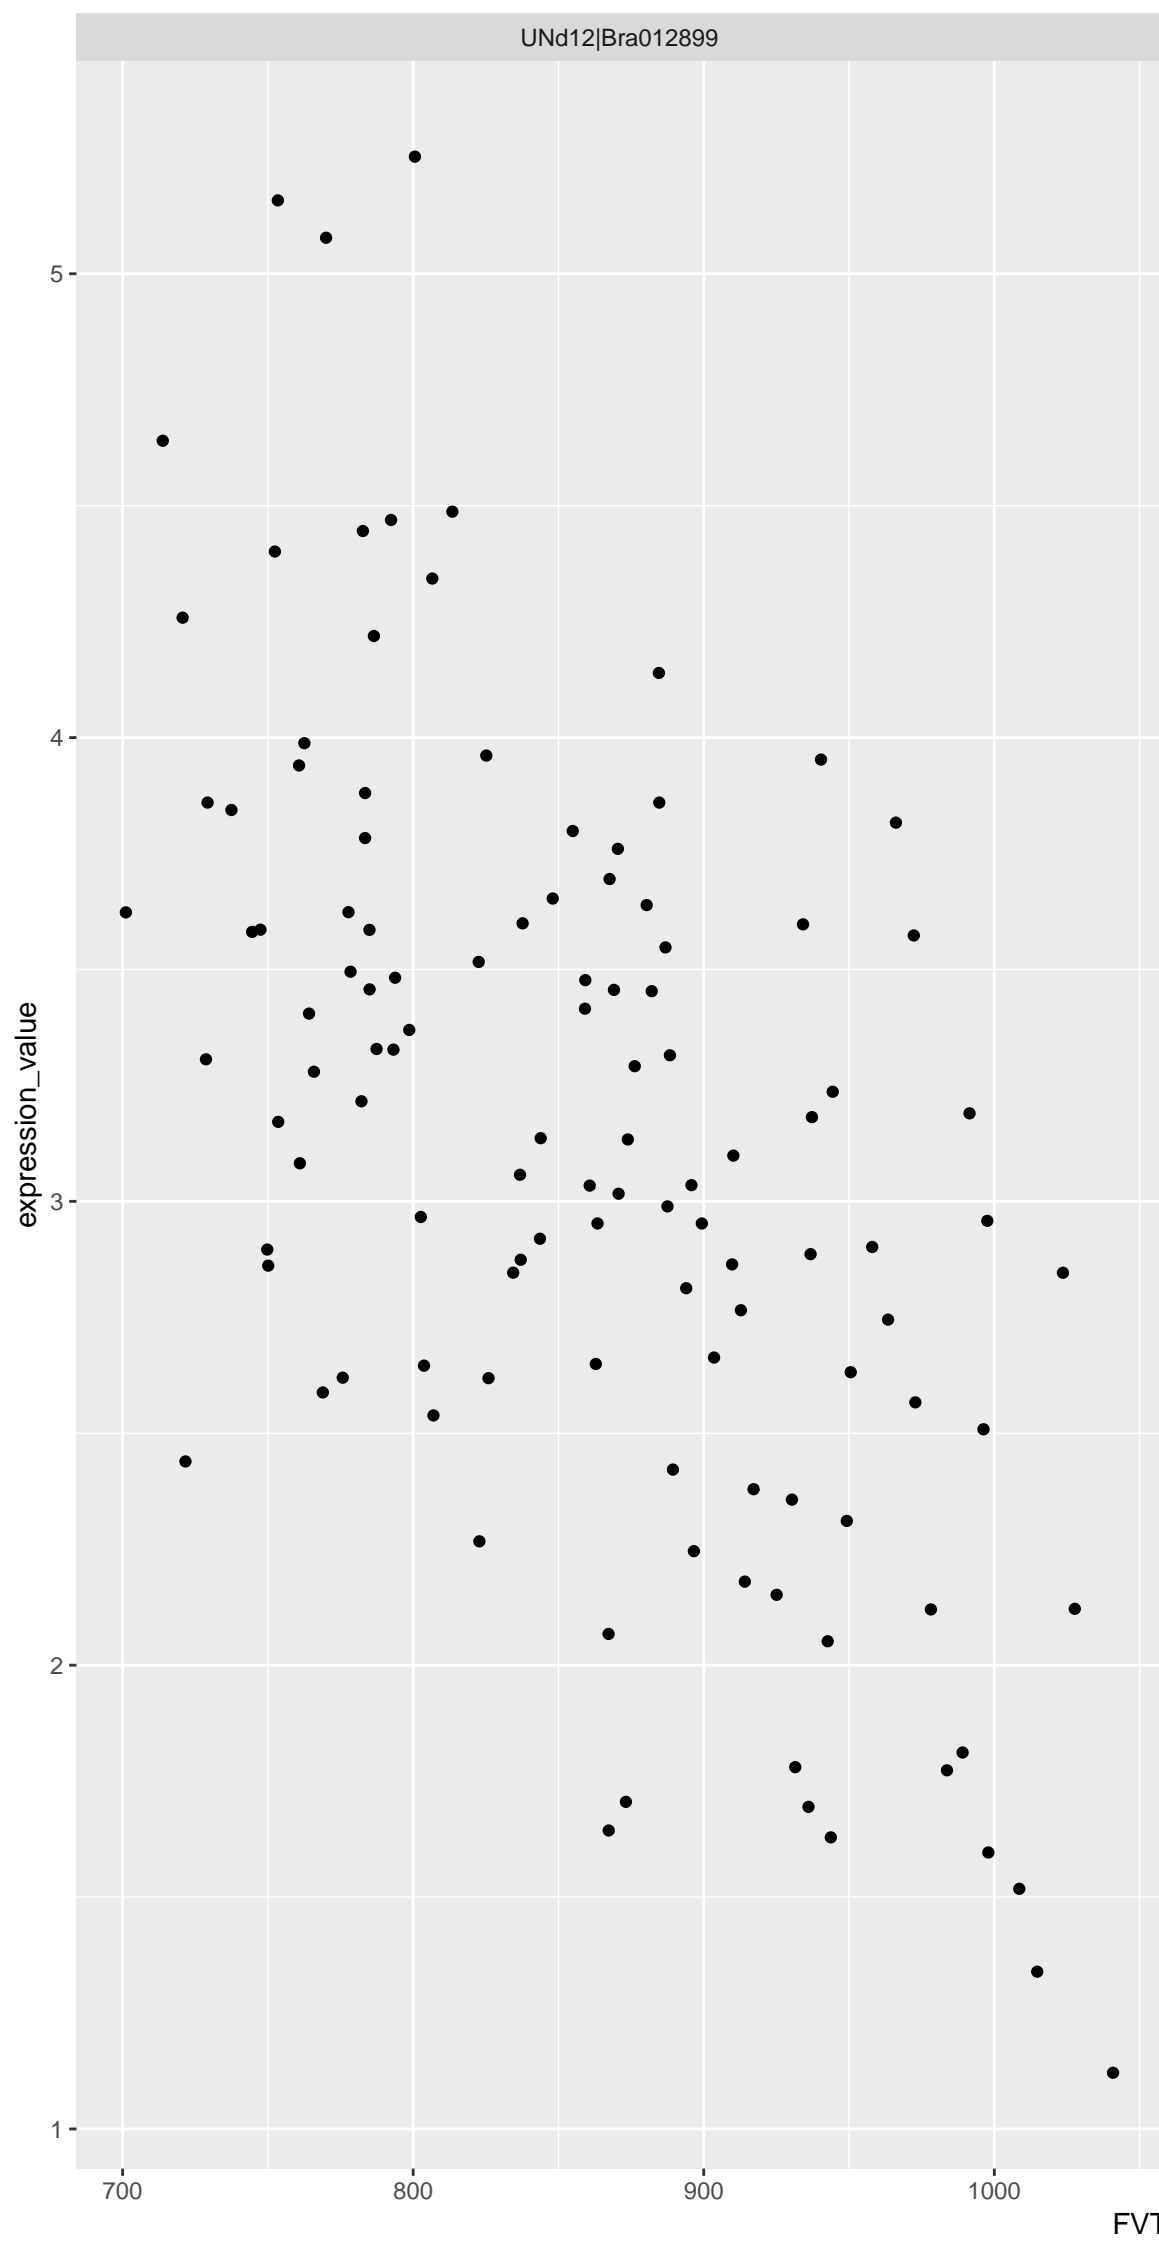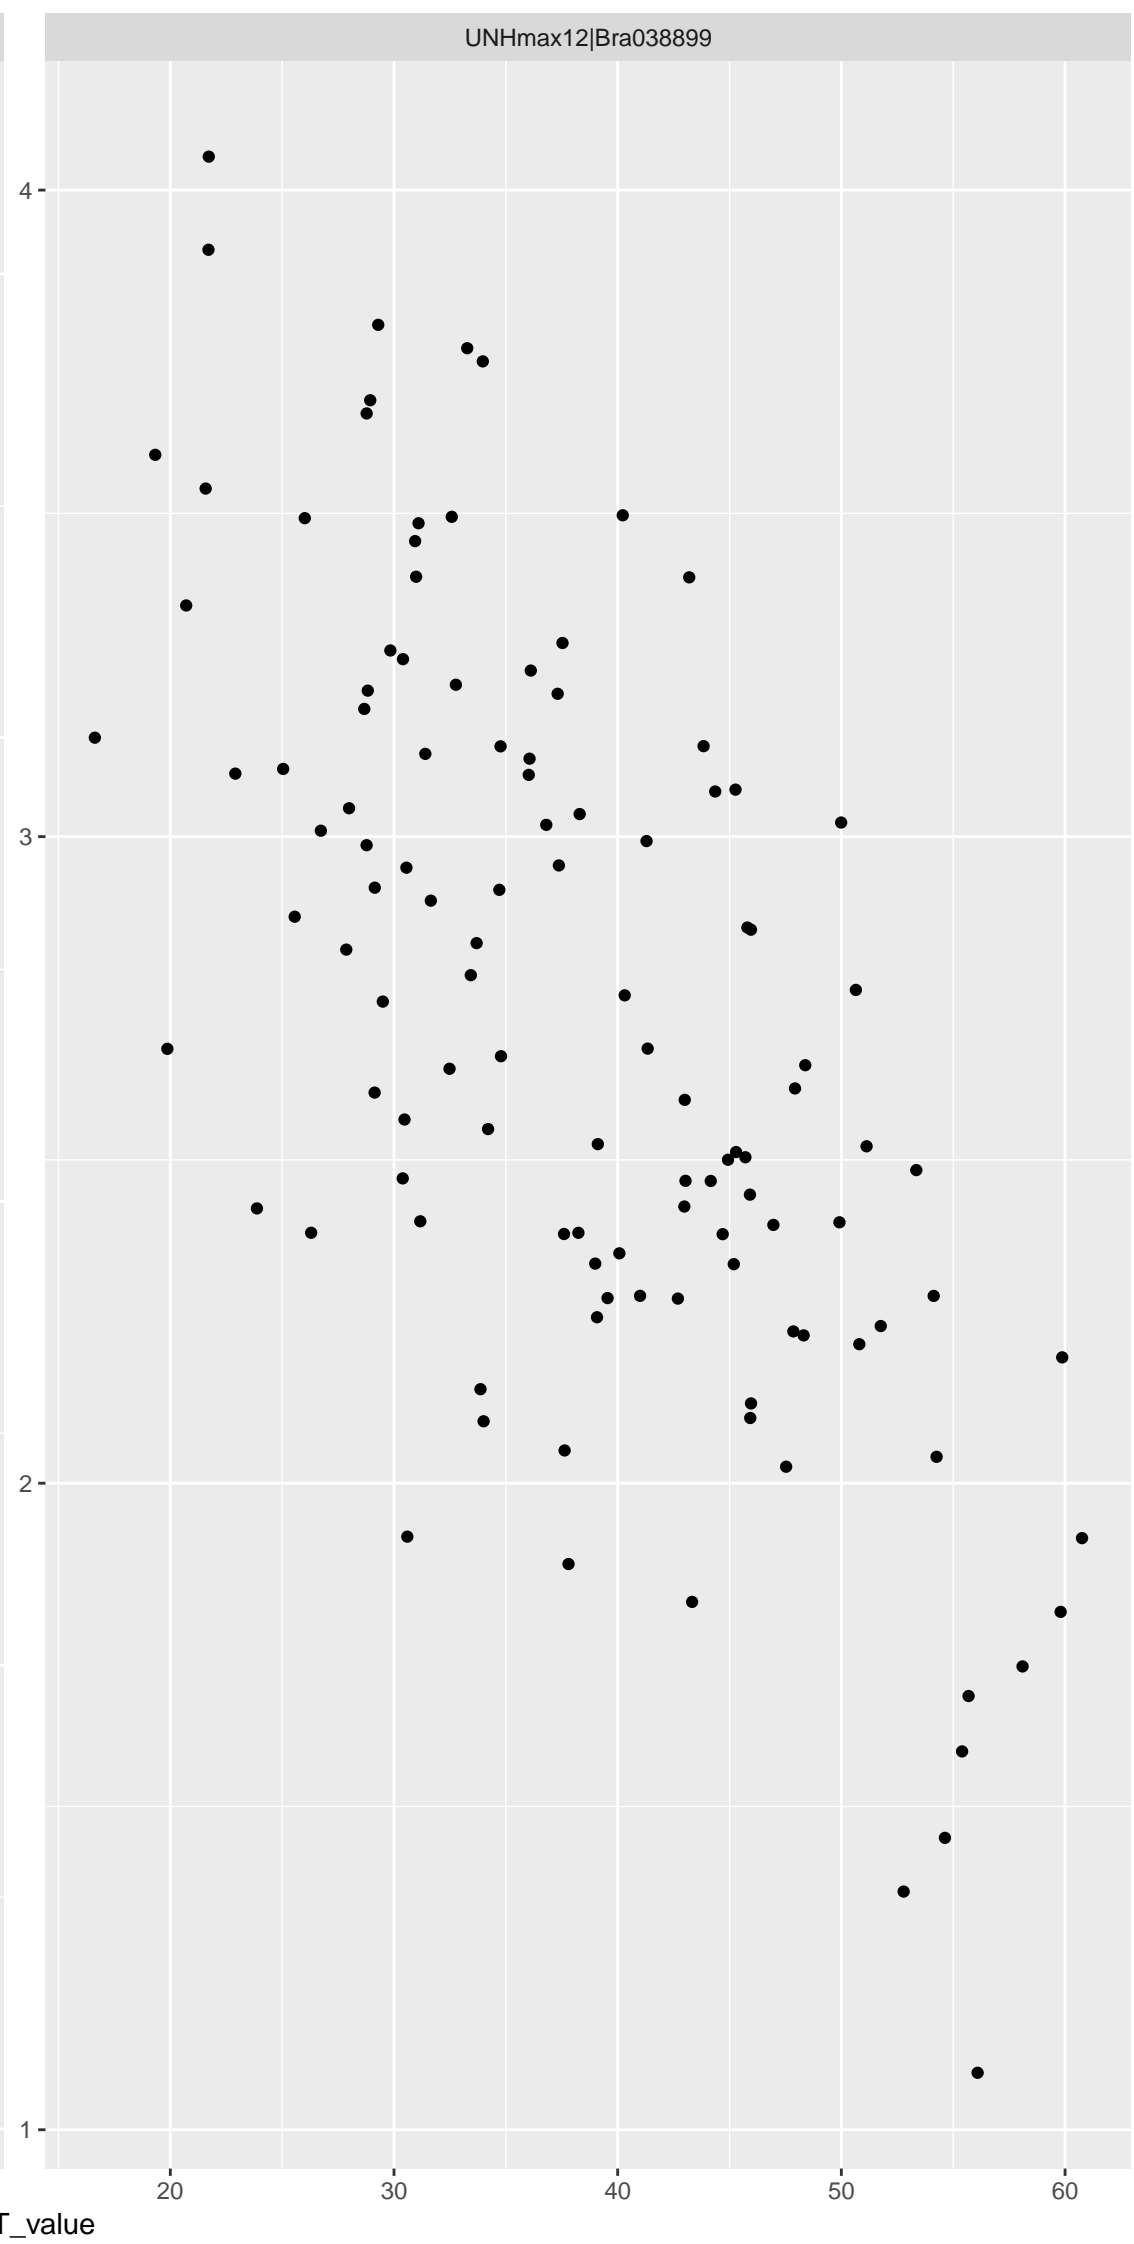

MR20

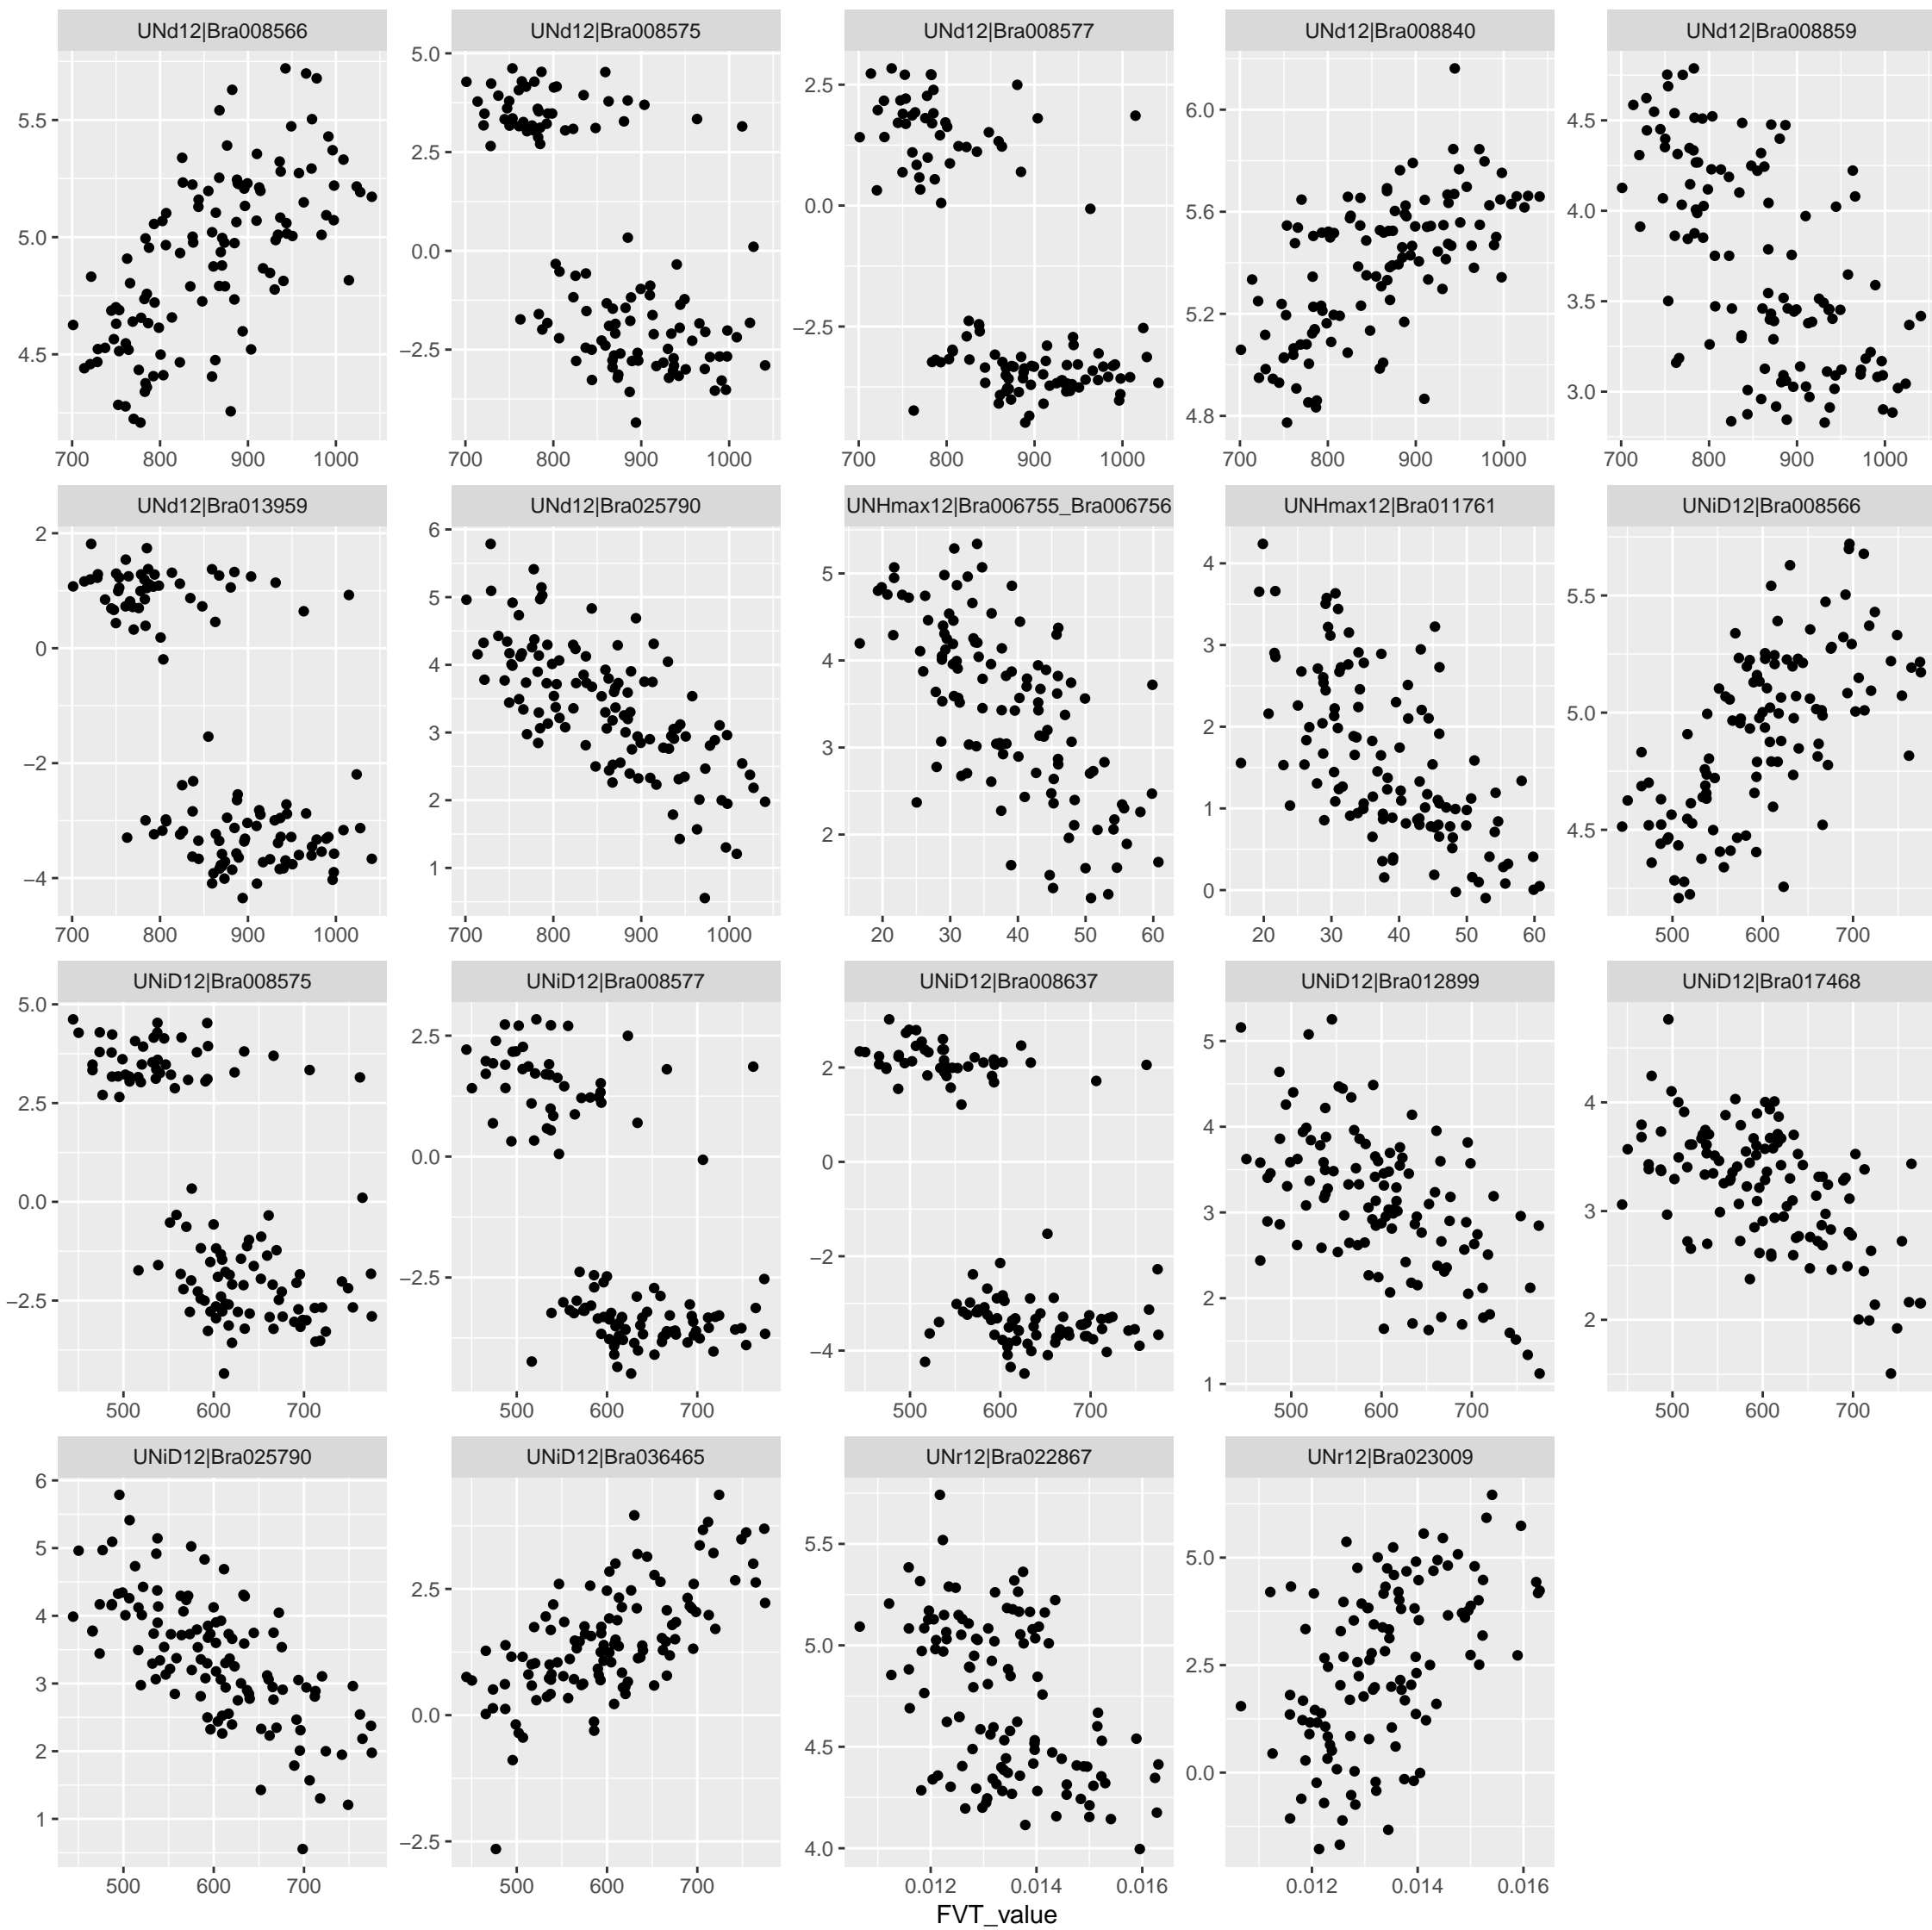

## MR30

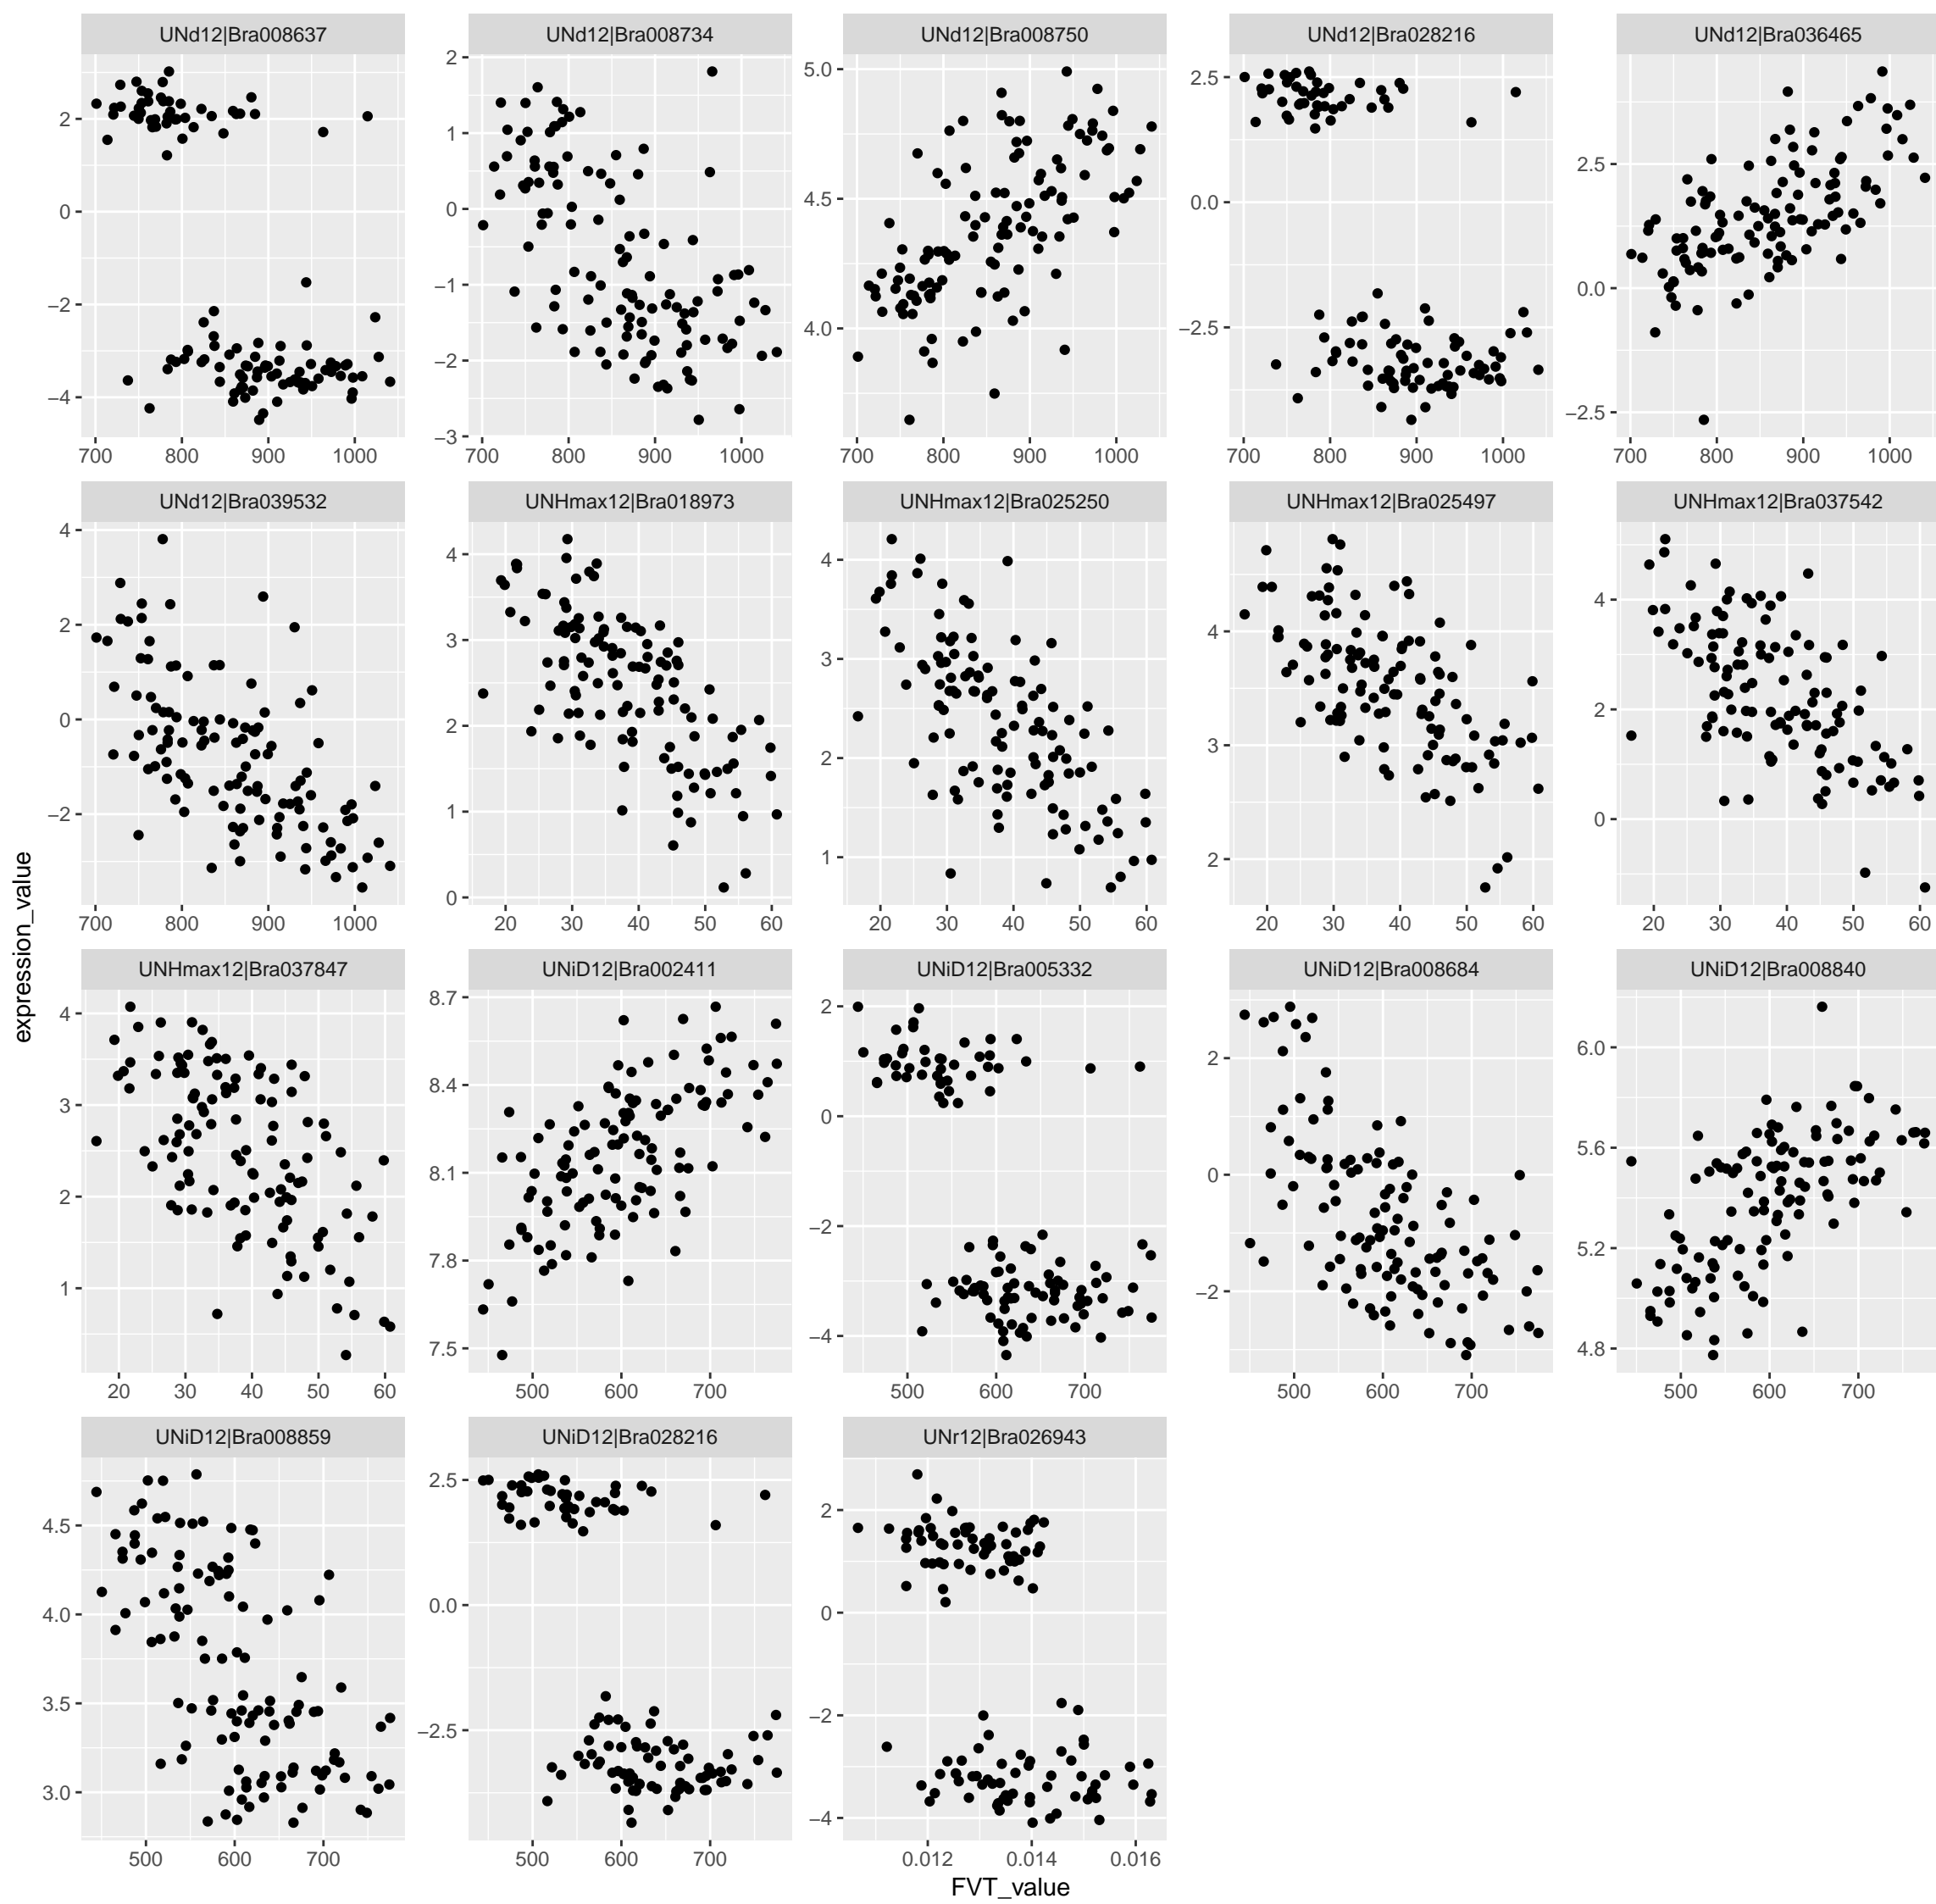

## MR50

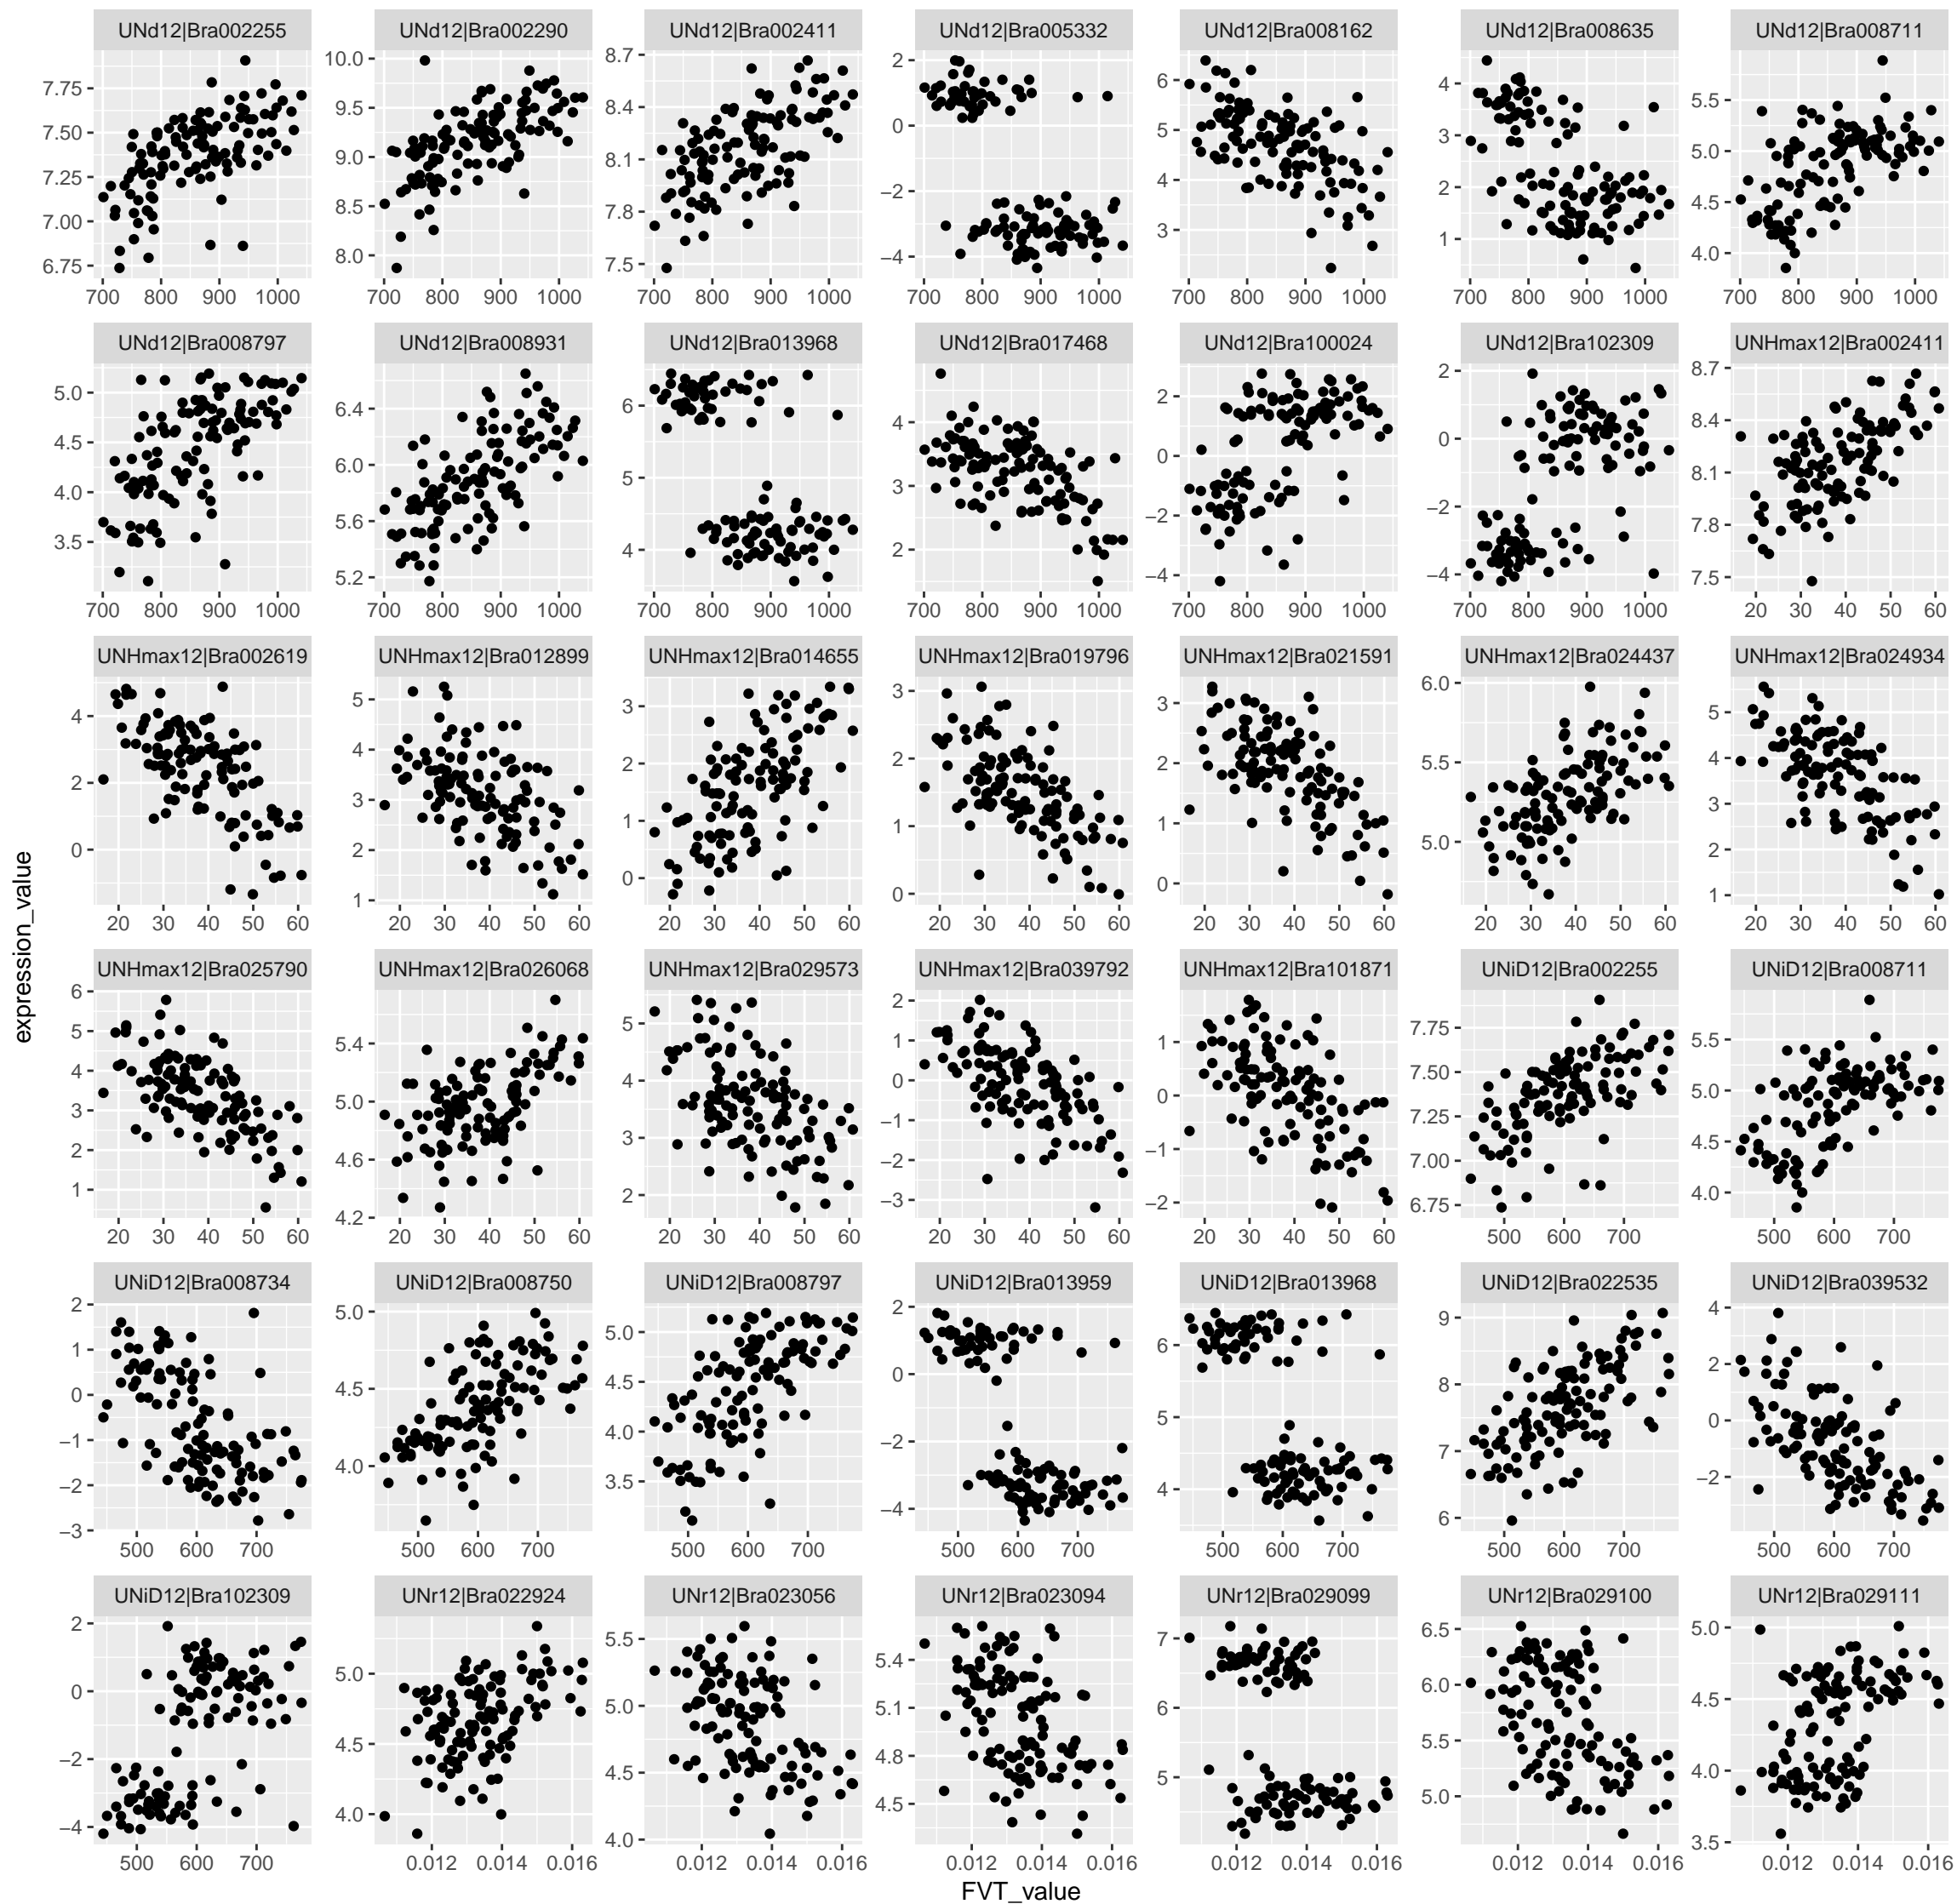

Supplement: pgen.1008367.s005.pdf [file pgen.1008367.s005.pdf]
